# Supplementary material for: Determinants of Protein Abundance and Translation Efficiency in S. cerevisiae
Source: PLoS Comput Biol. 2007 Dec 21;3(12):e248. doi: 10.1371/journal.pcbi.0030248 (PMC2230678; doi:10.1371/journal.pcbi.0030248)
Supplement: Table S4 — The list of genes in each cluster and bi-cluster is depicted together with the GO enrichment categories (for each of the ontologies: process, function, and component) of each cluster/bi-cluster. The score of each bi-cluster (by Expander) is depicted near the name of the bi-cluster (as mentioned by the authors of the pertaining Expander software used there, these scores are good only for comparing bi-clusters with the same size). The mean pattern of each bi-cluster and the index of conditions that are related to it (x-axis) appear near each bi-cluster. (1.6 MB XLS) [file pcbi.0030248.st004.xls]

## Sheet: Sheet1
Table S3 A: Clustering (sheet 1) and bi-clustering (sheet 2) of the predicted protein
abundance from the work of Sheehan et al. The list of genes in each cluster and
bi-cluster is depicted together with the GO enrichment categories (for each of the
ontologies: Process, Function, and Component) of each cluster/bi-cluster.
The score of each bi-cluster (by Expander) is depicted near the name of the bi-cluster (As mentioned by the authors of the pertaining Expander software used there, these scores are good only for comparing bi-clusters with the same size).
The mean pattern of each bi-cluster and the index of conditions that are related to it (x-axis) appear near each bi-cluster
Clusters
Cluster 1
Genes
YNR033W	ABZ1	YNR033W
YAR015W	ADE1	YAR015W
YNL220W	ADE12	YNL220W
YOR128C	ADE2	YOR128C
YMR300C	ADE4	YMR300C
YGL234W	"ADE5	YGL234W
YDR408C	ADE8	YDR408C
YCR011C	ADP1	YCR011C
YER017C	AFG3	YER017C
YDL178W	DLD2	YDL178W
YPL061W	ALD6	YPL061W
YNL048W	ALG11	YNL048W
YGL065C	ALG2	YGL065C
YEL036C	ANP1	YEL036C
YCL050C	APA1	YCL050C
YKL135C	APL2	YKL135C
YBL037W	APL3	YBL037W
YPL195W	APL5	YPL195W
YGR261C	APL6	YGR261C
YML022W	APT1	YML022W
YDR441C	APT2	YDR441C
YGL105W	ARC1	YGL105W
YHR013C	ARD1	YHR013C
YOL058W	ARG1	YOL058W
YHR018C	ARG4	YHR018C
YDR127W	ARO1	YDR127W
YBR249C	ARO4	YBR249C
YPR060C	ARO7	YPR060C
YHR137W	ARO9	YHR137W
YPR034W	ARP7	YPR034W
YMR301C	ATM1	YMR301C
YKL004W	AUR1	YKL004W
YJR148W	BAT2	YJR148W
YER155C	BEM2	YER155C
YPL115C	BEM3	YPL115C
YER177W	BMH1	YER177W
YER114C	BOI2	YER114C
YER172C	BRR2	YER172C
YJR092W	BUD4	YJR092W
YML102W	CAC2	YML102W
YOR276W	CAF20	YOR276W
YEL063C	CAN1	YEL063C
YJR060W	CBF1	YJR060W
YDR270W	CCC2	YDR270W
YJR076C	CDC11	YJR076C
YHR107C	CDC12	YHR107C
YFR028C	CDC14	YFR028C
YOL139C	CDC33	YOL139C
YCR093W	CDC39	YCR093W
YBR202W	CDC47	YBR202W
YPR019W	CDC54	YPR019W
YGL190C	CDC55	YGL190C
YLR418C	CDC73	YLR418C
YGL206C	CHC1	YGL206C
YGR157W	CHO2	YGR157W
YDL145C	COP1	YDL145C
YER141W	COX15	YER141W
YJR032W	CPR7	YJR032W
YNR028W	CPR8	YNR028W
YGL238W	CSE1	YGL238W
YOL007C	CSI2	YOL007C
YML112W	CTK3	YML112W
YPR124W	CTR1	YPR124W
YHR175W	CTR2	YHR175W
YCR054C	CTR86	YCR054C
YGR036C	CAX4	YGR036C
YKL096W	CWP1	YKL096W
YNL111C	CYB5	YNL111C
YMR032W	HOF1	YMR032W
YGL078C	DBP3	YGL078C
YNR038W	DBP6	YNR038W
YHR169W	DBP8	YHR169W
YOL149W	DCP1	YOL149W
YFL001W	DEG1	YFL001W
YMR238W	DFG5	YMR238W
YOR236W	DFR1	YOR236W
YIR004W	DJP1	YIR004W
YNL186W	UBP10	YNL186W
YKL191W	DPH2	YKL191W
YBR252W	DUT1	YBR252W
YHR068W	DYS1	YHR068W
YAL059W	ECM1	YAL059W
YHL030W	ECM29	YHL030W
YER176W	ECM32	YER176W
YNL327W	EGT2	YNL327W
YJL196C	ELO1	YJL196C
YFL048C	EMP47	YFL048C
YPL028W	ERG10	YPL028W
YGL012W	ERG4	YGL012W
YMR220W	ERG8	YMR220W
YGR207C	non	YGR207C
YJL085W	EXO70	YJL085W
YJL168C	SET2	YJL168C
YPL231W	FAS2	YPL231W
YMR277W	FCP1	YMR277W
YMR058W	FET3	YMR058W
YDR519W	FPR2	YDR519W
YER145C	FTR1	YER145C
YBR179C	FZO1	YBR179C
YER027C	GAL83	YER027C
YCL011C	GBP2	YCL011C
YOR260W	GCD1	YOR260W
YJL125C	GCD14	YJL125C
YLR291C	GCD7	YLR291C
YGL195W	GCN1	YGL195W
YDL226C	GCS1	YDL226C
YAL044C	GCV3	YAL044C
YEL042W	GDA1	YEL042W
YHR061C	GIC1	YHR061C
YKL173W	SNU114	YKL173W
YER107C	GLE2	YER107C
YPL091W	GLR1	YPL091W
YCR034W	FEN1	YCR034W
YOL059W	GPD2	YOL059W
YDR331W	GPI8	YDR331W
YBR121C	GRS1	YBR121C
YMR189W	GCV2	YMR189W
YDR454C	GUK1	YDR454C
YOL064C	MET22	YOL064C
YJR069C	HAM1	YJR069C
YCR065W	HCM1	YCR065W
YGR187C	HGH1	YGR187C
YPL127C	HHO1	YPL127C
YLL022C	HIF1	YLL022C
YGR191W	HIP1	YGR191W
YCL030C	HIS4	YCL030C
YIL116W	HIS5	YIL116W
YBR248C	HIS7	YBR248C
YML075C	HMG1	YML075C
YLR450W	HMG2	YLR450W
YJR147W	HMS2	YJR147W
YBR034C	HMT1	YBR034C
YDR158W	HOM2	YDR158W
YER052C	HOM3	YER052C
YDR399W	HPT1	YDR399W
YNL004W	HRB1	YNL004W
YPL204W	HRR25	YPL204W
YBR272C	HSM3	YBR272C
YHR127W	non	YHR127W
YOL012C	HTZ1	YOL012C
YPR033C	HTS1	YPR033C
YHR187W	IKI1	YHR187W
YBL076C	ILS1	YBL076C
YER086W	ILV1	YER086W
YJR016C	ILV3	YJR016C
YCL009C	ILV6	YCL009C
YIL026C	IRR1	YIL026C
YBR017C	KAP104	YBR017C
YMR308C	PSE1	YMR308C
YER110C	KAP123	YER110C
YHR158C	KEL1	YHR158C
YPL263C	KEL3	YPL263C
YPL145C	KES1	YPL145C
YIL125W	KGD1	YIL125W
YGR229C	SMI1	YGR229C
YKL110C	KTI12	YKL110C
YOR099W	KTR1	YOR099W
YBR205W	KTR3	YBR205W
YHL003C	LAG1	YHL003C
YMR296C	LCB1	YMR296C
YDR062W	LCB2	YDR062W
YNL104C	LEU4	YNL104C
YDL051W	LHP1	YDL051W
YKL205W	LOS1	YKL205W
YKL021C	MAK11	YKL021C
YPR051W	MAK3	YPR051W
YBL091C	MAP2	YBL091C
YBR185C	MBA1	YBR185C
YDL003W	MCD1	YDL003W
YBL023C	MCM2	YBL023C
YBR247C	ENP1	YBR247C
YGR264C	MES1	YGR264C
YIL128W	MET18	YIL128W
YER091C	MET6	YER091C
YOR232W	MGE1	YOR232W
YJR077C	MIR1	YJR077C
YDR245W	MNN10	YDR245W
YJL183W	MNN11	YJL183W
YPL050C	MNN9	YPL050C
YDR347W	MRP1	YDR347W
YGR084C	MRP13	YGR084C
YHL004W	MRP4	YHL004W
YDL202W	MRPL11	YDL202W
YNL185C	MRPL19	YNL185C
YKR085C	MRPL20	YKR085C
YDR322W	MRPL35	YDR322W
YBR122C	MRPL36	YBR122C
YBR268W	MRPL37	YBR268W
YKL170W	MRPL38	YKL170W
YJL096W	MRPL49	YJL096W
YJL063C	MRPL8	YJL063C
YGR220C	MRPL9	YGR220C
YKL009W	MRT4	YKL009W
YOR188W	MSB1	YOR188W
YOL090W	MSH2	YOL090W
YOR370C	MRS6	YOR370C
YDR194C	MSS116	YDR194C
YKR080W	MTD1	YKR080W
YOR160W	MTR10	YOR160W
YGR007W	MUQ1	YGR007W
YHR086W	NAM8	YHR086W
YML031W	NDC1	YML031W
YDL208W	NHP2	YDL208W
YPR052C	NHP6A	YPR052C
YDR456W	NHX1	YDR456W
YFR002W	NIC96	YFR002W
YPL124W	SPC29	YPL124W
YPL211W	NIP7	YPL211W
YHR170W	NMD3	YHR170W
YJR132W	NMD5	YJR132W
YJR112W	NNF1	YJR112W
YNL061W	NOP2	YNL061W
YPL043W	NOP4	YPL043W
YOR310C	NOP58	YOR310C
YLR197W	SIK1	YLR197W
YIL038C	NOT3	YIL038C
YBR170C	NPL4	YBR170C
YDL167C	NRP1	YDL167C
YGR159C	NSR1	YGR159C
YOR098C	NUP1	YOR098C
YKL068W	NUP100	YKL068W
YKR082W	NUP133	YKR082W
YGL092W	NUP145	YGL092W
YER105C	NUP157	YER105C
YIL115C	NUP159	YIL115C
YML103C	NUP188	YML103C
YLR335W	NUP2	YLR335W
YJL061W	NUP82	YJL061W
YJR042W	NUP85	YJR042W
YGR038W	ORM1	YGR038W
YER154W	OXA1	YER154W
YER165W	PAB1	YER165W
YGR078C	PAC10	YGR078C
YCR077C	PAT1	YCR077C
YEL058W	PCM1	YEL058W
YOR360C	PDE2	YOR360C
YGL016W	KAP122	YGL016W
YCR012W	PGK1	YCR012W
YKL127W	PGM1	YKL127W
YDL236W	PHO13	YDL236W
YBR106W	PHO88	YBR106W
YBL105C	PKC1	YBL105C
YGL008C	PMA1	YGL008C
YAL023C	PMT2	YAL023C
YKL128C	PMU1	YKL128C
YEL055C	POL5	YEL055C
YNR052C	POP2	YNR052C
YHR201C	PPX1	YHR201C
YER023W	PRO3	YER023W
YLL036C	PRP19	YLL036C
YML046W	PRP39	YML046W
YGL120C	PRP43	YGL120C
YER099C	PRS2	YER099C
YHL011C	PRS3	YHL011C
YBL068W	PRS4	YBL068W
YOL061W	PRS5	YOL061W
YOR361C	PRT1	YOR361C
YAL043C	PTA1	YAL043C
YPL212C	PUS1	YPL212C
YDL103C	QRI1	YDL103C
YEL037C	RAD23	YEL037C
YKL113C	RAD27	YKL113C
YER095W	RAD51	YER095W
YNL216W	RAP1	YNL216W
YFR051C	RET2	YFR051C
YJL173C	RFA3	YJL173C
YNL290W	RFC3	YNL290W
YOL094C	RFC4	YOL094C
YBR087W	RFC5	YBR087W
YOL066C	RIB2	YOL066C
YDR487C	RIB3	YDR487C
YDR257C	SET7	YDR257C
YMR235C	RNA1	YMR235C
YMR061W	RNA14	YMR061W
YER070W	RNR1	YER070W
YPR065W	ROX1	YPR065W
YJR063W	RPA12	YJR063W
YDR156W	RPA14	YDR156W
YOR341W	RPA190	YOR341W
YJL148W	RPA34	YJL148W
YOR340C	RPA43	YOR340C
YIL021W	RPB3	YIL021W
YGL070C	RPB9	YGL070C
YNL113W	RPC19	YNL113W
YDL150W	RPC53	YDL150W
YJL121C	RPE1	YJL121C
YPR102C	RPL11A	YPR102C
YEL054C	RPL12A	YEL054C
YGL135W	RPL1B	YGL135W
YMR242C	RPL20A	YMR242C
YOR063W	RPL3	YOR063W
YPL131W	RPL5	YPL131W
YHL033C	RPL8A	YHL033C
YGL147C	RPL9A	YGL147C
YHR027C	RPN1	YHR027C
YHR200W	RPN10	YHR200W
YPR108W	RPN7	YPR108W
YHR062C	RPP1	YHR062C
YOL039W	RPP2A	YOL039W
YML063W	RPS1B	YML063W
YGL048C	RPT6	YGL048C
YDR087C	RRP1	YDR087C
YHR069C	RRP4	YHR069C
YGR195W	SKI6	YGR195W
YDL111C	RRP42	YDL111C
YCR035C	RRP43	YCR035C
YCL031C	RRP7	YCL031C
YKR008W	RSC4	YKR008W
YFR037C	RSC8	YFR037C
YML049C	RSE1	YML049C
YGR152C	RSR1	YGR152C
YKL212W	SAC1	YKL212W
YER043C	SAH1	YER043C
YDR502C	SAM2	YDR502C
YJL098W	SAP185	YJL098W
YBR070C	ALG14	YBR070C
YHR103W	SBE22	YHR103W
YHL034C	SBP1	YHL034C
YHR205W	SCH9	YHR205W
YMR214W	SCJ1	YMR214W
YOL020W	TAT2	YOL020W
YER120W	SCS2	YER120W
YGL126W	SCS3	YGL126W
YBL011W	SCT1	YBL011W
YNL287W	SEC21	YNL287W
YLR268W	SEC22	YLR268W
YDL195W	SEC31	YDL195W
YPL094C	SEC62	YPL094C
YML105C	SEC65	YML105C
YDR170C	SEC7	YDR170C
YGR208W	SER2	YGR208W
YLR321C	SFH1	YLR321C
YLR058C	SHM2	YLR058C
YER118C	SHO1	YER118C
YNL236W	SIN4	YNL236W
YDL042C	SIR2	YDL042C
YPR189W	SKI3	YPR189W
YDL052C	SLC1	YDL052C
YDR189W	SLY1	YDR189W
YNR015W	SMM1	YNR015W
YPR182W	SMX3	YPR182W
YBR172C	SMY2	YBR172C
YIL016W	SNL1	YIL016W
YMR016C	SOK2	YMR016C
YHR163W	SOL3	YHR163W
YJL124C	LSM1	YJL124C
YEL031W	SPF1	YEL031W
YHR136C	SPL2	YHR136C
YGR116W	SPT6	YGR116W
YIR012W	SQT1	YIR012W
YER022W	SRB4	YER022W
YIL140W	AXL2	YIL140W
YCL037C	SRO9	YCL037C
YPL243W	SRP68	YPL243W
YPL210C	SRP72	YPL210C
YDL229W	SSB1	YDL229W
YHR066W	SSF1	YHR066W
YBR283C	SSH1	YBR283C
YHR084W	STE12	YHR084W
YDR410C	STE14	YDR410C
YIL126W	STH1	YIL126W
YGL022W	STT3	YGL022W
YLR045C	STU2	YLR045C
YMR054W	STV1	YMR054W
YGL169W	SUA5	YGL169W
YJR007W	SUI2	YJR007W
YNL066W	SUN4	YNL066W
YBR143C	SUP45	YBR143C
YDR297W	SUR2	YDR297W
YLR372W	SUR4	YLR372W
YML052W	SUR7	YML052W
YDR167W	TAF10	YDR167W
YGL112C	TAF6	YGL112C
YDR161W	non	YDR161W
YHR025W	THR1	YHR025W
YJL138C	TIF2	YJL138C
YJL143W	TIM17	YJL143W
YNR017W	MAS6	YNR017W
YIL022W	TIM44	YIL022W
YGL145W	TIP20	YGL145W
YGR082W	TOM20	YGR082W
YNL088W	TOP2	YNL088W
YJL087C	TRL1	YJL087C
YDR120C	TRM1	YDR120C
YER090W	TRP2	YER090W
YKL211C	TRP3	YKL211C
YDR354W	TRP4	YDR354W
YDR353W	TRR1	YDR353W
YBR015C	MNN2	YBR015C
YBR166C	TYR1	YBR166C
YDR177W	UBC1	YDR177W
YDR207C	UME6	YDR207C
YJL130C	URA2	YJL130C
YML106W	URA5	YML106W
YDL058W	USO1	YDL058W
YER112W	LSM4	YER112W
YEL040W	UTR2	YEL040W
YEL038W	UTR4	YEL038W
YBR069C	TAT1	YBR069C
YGR094W	VAS1	YGR094W
YKL080W	VMA5	YKL080W
YOR270C	VPH1	YOR270C
YKR001C	VPS1	YKR001C
YLR396C	VPS33	YLR396C
YJL154C	VPS35	YJL154C
YML097C	VPS9	YML097C
YOL097C	WRS1	YOL097C
YAL007C	ERP2	YAL007C
YAL033W	POP5	YAL033W
YAL036C	RBG1	YAL036C
YAR002W	NUP60	YAR002W
YPL239W	YAR1	YPL239W
YBL024W	NCL1	YBL024W
YBL055C	non	YBL055C
YBL104C	non	YBL104C
YBR002C	RER2	YBR002C
YBR028C	non	YBR028C
YBR061C	TRM7	YBR061C
YBR086C	IST2	YBR086C
YBR095C	RXT2	YBR095C
YBR155W	CNS1	YBR155W
YBR162C	TOS1	YBR162C
YBR254C	TRS20	YBR254C
YBR265W	TSC10	YBR265W
YBR267W	REI1	YBR267W
YNL154C	YCK2	YNL154C
YER123W	YCK3	YER123W
YCR017C	CWH43	YCR017C
YCR044C	PER1	YCR044C
YCR051W	non	YCR051W
YCR057C	PWP2	YCR057C
YNL064C	YDJ1	YNL064C
YDL018C	ERP3	YDL018C
YDL060W	TSR1	YDL060W
YDL100C	GET3	YDL100C
YDL144C	non	YDL144C
YDL166C	FAP7	YDL166C
YDL201W	TRM8	YDL201W
YDL203C	ACK1	YDL203C
YDL225W	SHS1	YDL225W
YDR033W	MRH1	YDR033W
YDR061W	non	YDR061W
YDR083W	RRP8	YDR083W
YDR101C	ARX1	YDR101C
YDR111C	ALT2	YDR111C
YDR175C	RSM24	YDR175C
YDR190C	RVB1	YDR190C
YDR205W	MSC2	YDR205W
YDR233C	RTN1	YDR233C
YDR239C	non	YDR239C
YDR302W	GPI11	YDR302W
YDR352W	non	YDR352W
YDR361C	BCP1	YDR361C
YDR384C	ATO3	YDR384C
YDR398W	UTP5	YDR398W
YDR449C	UTP6	YDR449C
YDR465C	RMT2	YDR465C
YDR517W	GRH1	YDR517W
YDR524C	AGE1	YDR524C
YDR527W	RBA50	YDR527W
YLR249W	YEF3	YLR249W
YEL001C	IRC22	YEL001C
YEL015W	EDC3	YEL015W
YEL048C	non	YEL048C
YEL065W	SIT1	YEL065W
YER006W	NUG1	YER006W
YER018C	SPC25	YER018C
YER049W	TPA1	YER049W
YER072W	VTC1	YER072W
YER092W	IES5	YER092W
YER113C	non	YER113C
YER126C	NSA2	YER126C
YER156C	non	YER156C
YFL004W	VTC2	YFL004W
YFL047W	RGD2	YFL047W
YFR001W	LOC1	YFR001W
YFR006W	non	YFR006W
YFR011C	non	YFR011C
YGL067W	NPY1	YGL067W
YGL068W	MNP1	YGL068W
YGL099W	LSG1	YGL099W
YGL101W	non	YGL101W
YGL107C	RMD9	YGL107C
YGL111W	NSA1	YGL111W
YGL133W	ITC1	YGL133W
YGL246C	RAI1	YGL246C
YGR012W	non	YGR012W
YGR031W	non	YGR031W
YGR081C	SLX9	YGR081C
YGR095C	RRP46	YGR095C
YGR103W	NOP7	YGR103W
YGR128C	UTP8	YGR128C
YGR173W	RBG2	YGR173W
YGR251W	non	YGR251W
YGR262C	BUD32	YGR262C
YGR234W	YHB1	YGR234W
YHL013C	OTU2	YHL013C
YMR241W	YHM2	YMR241W
YHR003C	non	YHR003C
YHR046C	INM1	YHR046C
YHR049W	FSH1	YHR049W
YHR063C	PAN5	YHR063C
YHR073W	OSH3	YHR073W
YHR085W	IPI1	YHR085W
YHR108W	GGA2	YHR108W
YHR122W	non	YHR122W
YHR133C	NSG1	YHR133C
YHR149C	SKG6	YHR149C
YHR162W	non	YHR162W
YHR196W	UTP9	YHR196W
YHR197W	RIX1	YHR197W
YIL039W	non	YIL039W
YIL040W	APQ12	YIL040W
YIL074C	SER33	YIL074C
YIL091C	non	YIL091C
YIL093C	RSM25	YIL093C
YIL145C	PAN6	YIL145C
YIL158W	non	YIL158W
YJL010C	NOP9	YJL010C
YJL062W	LAS21	YJL062W
YJL104W	PAM16	YJL104W
YJL109C	UTP10	YJL109C
YJL122W	ALB1	YJL122W
YJL145W	SFH5	YJL145W
YJL186W	MNN5	YJL186W
YJL207C	LAA1	YJL207C
YJL212C	OPT1	YJL212C
YJR003C	non	YJR003C
YJR013W	GPI14	YJR013W
YJR070C	LIA1	YJR070C
YJR072C	NPA3	YJR072C
YJR080C	FMP26	YJR080C
YJR097W	JJJ3	YJR097W
YJR113C	RSM7	YJR113C
YKL008C	LAC1	YKL008C
YKL029C	MAE1	YKL029C
YKL116C	PRR1	YKL116C
YKL120W	OAC1	YKL120W
YKL183W	LOT5	YKL183W
YKL192C	ACP1	YKL192C
YKR043C	non	YKR043C
YKR045C	non	YKR045C
YKR060W	UTP30	YKR060W
YKR065C	PAM17	YKR065C
YKR071C	DRE2	YKR071C
YKR079C	TRZ1	YKR079C
YKR090W	PXL1	YKR090W
YLL028W	TPO1	YLL028W
YLL032C	non	YLL032C
YLR002C	NOC3	YLR002C
YLR022C	SDO1	YLR022C
YLR073C	non	YLR073C
YLR084C	RAX2	YLR084C
YLR221C	RSA3	YLR221C
YLR222C	UTP13	YLR222C
YLR328W	NMA1	YLR328W
YLR386W	VAC14	YLR386W
YLR405W	DUS4	YLR405W
YLR413W	non	YLR413W
YLR432W	IMD3	YLR432W
YLR435W	TSR2	YLR435W
YLR440C	SEC39	YLR440C
YPR024W	YME1	YPR024W
YML005W	TRM12	YML005W
YML014W	TRM9	YML014W
YML018C	non	YML018C
YML059C	NTE1	YML059C
YML080W	DUS1	YML080W
YML082W	non	YML082W
YML093W	UTP14	YML093W
YML096W	non	YML096W
YMR010W	non	YMR010W
YMR048W	CSM3	YMR048W
YMR086W	non	YMR086W
YMR093W	UTP15	YMR093W
YMR153W	NUP53	YMR153W
YMR212C	EFR3	YMR212C
YMR237W	BCH1	YMR237W
YMR259C	non	YMR259C
YMR266W	RSN1	YMR266W
YMR309C	NIP1	YMR309C
YMR313C	TGL3	YMR313C
YNL010W	non	YNL010W
YNL058C	non	YNL058C
YNL065W	AQR1	YNL065W
YNL078W	NIS1	YNL078W
YNL087W	TCB2	YNL087W
YNL119W	NCS2	YNL119W
YNL123W	NMA111	YNL123W
YNL163C	RIA1	YNL163C
YNL168C	FMP41	YNL168C
YNL175C	NOP13	YNL175C
YNL181W	non	YNL181W
YNL201C	PSY2	YNL201C
YNL206C	RTT106	YNL206C
YNL207W	RIO2	YNL207W
YNL278W	CAF120	YNL278W
YNL308C	KRI1	YNL308C
YNL313C	non	YNL313C
YNR029C	non	YNR029C
YNR039C	ZRG17	YNR039C
YNR048W	non	YNR048W
YNR051C	BRE5	YNR051C
YOL022C	non	YOL022C
YOL027C	MDM38	YOL027C
YOL041C	NOP12	YOL041C
YOL077C	BRX1	YOL077C
YOL080C	REX4	YOL080C
YOL092W	non	YOL092W
YOL093W	TRM10	YOL093W
YOL124C	TRM11	YOL124C
YOL142W	RRP40	YOL142W
YOL144W	NOP8	YOL144W
YOR004W	UTP23	YOR004W
YOR051C	non	YOR051C
YOR056C	NOB1	YOR056C
YOR206W	NOC2	YOR206W
YOR226C	ISU2	YOR226C
YOR239W	ABP140	YOR239W
YOR241W	MET7	YOR241W
YOR247W	SRL1	YOR247W
YOR252W	TMA16	YOR252W
YOR271C	FSF1	YOR271C
YOR283W	non	YOR283W
YOR286W	FMP31	YOR286W
YOR291W	non	YOR291W
YOR342C	non	YOR342C
YOR354C	MSC6	YOR354C
YOR359W	VTS1	YOR359W
YOR372C	NDD1	YOR372C
YDL235C	YPD1	YDL235C
YPL093W	NOG1	YPL093W
YPL126W	NAN1	YPL126W
YPL137C	GIP3	YPL137C
YPL146C	NOP53	YPL146C
YPL183C	non	YPL183C
YPL184C	MRN1	YPL184C
YPL207W	TYW1	YPL207W
YPL208W	RKM1	YPL208W
YPL246C	RBD2	YPL246C
YPL252C	YAH1	YPL252C
YPR008W	HAA1	YPR008W
YPR114W	non	YPR114W
YPR118W	non	YPR118W
YPR125W	YLH47	YPR125W
YPR128C	ANT1	YPR128C
YPR137W	RRP9	YPR137W
YPR143W	RRP15	YPR143W
YPR169W	JIP5	YPR169W
YML001W	YPT7	YML001W
YIR026C	YVH1	YIR026C
YMR243C	ZRC1	YMR243C
GO Enrichments
Process
GOID	GO_term	Cluster frequency	Background frequency	P-value	Gene(s) annotated to the term	Directly Annotated GOID List
22613	ribonucleoprotein complex biogenesis and assembly	126 out of 652 genes, 19.3%	400 out of 7288 background genes, 5.5%	2.86e-37	POP5:RBG1:ECM1:NCL1:PRS4:HMT1:ENP1:REI1:RRP7:SRO9:RRP43:PWP2:PAT1:TSR1:RRP42:FAP7:NRP1:TRM8:NHP2:RRP8:RRP1:ARX1:TRM1:YDR161W:BCP1:UTP5:UTP6:RMT2:RPL12A:NUG1:TPA1:NSA2:PAB1:BRR2:LOC1:DBP3:LSG1:NSA1:PRP43:RAI1:SLX9:RRP46:NOP7:UTP8:NSR1:HGH1:SKI6:MRPL9:YGR251W:PRS3:SBP1:RPP1:SSF1:RRP4:IPI1:NAM8:DBP8:NMD3:UTP9:RIX1:NUP159:SQT1:YVH1:NOP9:UTP10:ALB1:GCD14:TIF2:RPA34:YJR003C:SUI2:RPA12:LIA1:MRT4:MAK11:S…	391:288:74:395:8298:396:30468:398:6400:6402:105:43248:6404:6406:6407:7067:6446:46515:184:6376:290:6379:6913:723:30437:16070:16072:5977:42273:18216:42274:6412:6413:6414:6270:6166:226:6999:6451:154:1403:6383:910:54:55:43330:6207:30488:30489:30846:7117:7047:7049:6281:162:6606:18195:6464:27:28:8283:349:278:30490:6970:42254:42255:747:7124:8033:7126:17183:6979:6611:6360:7059:245:6364:31118:6365:280:618…
42254	ribosome biogenesis and assembly	113 out of 652 genes, 17.3%	330 out of 7288 background genes, 4.5%	6.37e-37	POP5:RBG1:ECM1:NCL1:PRS4:HMT1:ENP1:REI1:RRP7:SRO9:RRP43:PWP2:TSR1:RRP42:FAP7:NRP1:TRM8:NHP2:RRP8:RRP1:ARX1:TRM1:YDR161W:BCP1:UTP5:UTP6:RMT2:RPL12A:NUG1:TPA1:NSA2:LOC1:DBP3:LSG1:NSA1:PRP43:RAI1:SLX9:RRP46:NOP7:UTP8:NSR1:HGH1:SKI6:MRPL9:YGR251W:PRS3:SBP1:RPP1:SSF1:RRP4:IPI1:DBP8:NMD3:UTP9:RIX1:NUP159:SQT1:YVH1:NOP9:UTP10:ALB1:GCD14:RPA34:YJR003C:RPA12:LIA1:MRT4:MAK11:DPH2:UTP30:NOC3:SDO1:SIK1:RSA3:…	391:288:8298:30468:6400:6402:105:43248:6404:6406:6407:7067:46515:6913:6379:30437:723:16070:16072:5977:18216:42273:42274:6412:6413:6414:6270:6166:226:6999:6451:154:1403:6383:54:910:55:43330:6207:30488:30489:30846:7117:7047:7049:6281:162:6606:18195:6464:27:8283:28:278:30490:6970:42254:42255:747:7124:17183:7126:8033:6979:6360:6611:7059:31118:6364:6365:280:6189:8361
16043	cellular component organization and biogenesis	335 out of 652 genes, 51.4%	2183 out of 7288 background genes, 30.0%	2.52e-30	ERP2:POP5:RBG1:PTA1:GCV3:ECM1:NUP60:MCM2:NCL1:YBL055C:PRS4:PKC1:RER2:KAP104:HMT1:RFC5:RXT2:PHO88:GRS1:SUP45:SMY2:FZO1:MBA1:CDC47:KTR3:ENP1:TRS20:REI1:SSH1:GBP2:RRP7:SRO9:CWH43:RRP43:PWP2:HCM1:PAT1:CDC39:MCD1:ERP3:SIR2:USO1:TSR1:GET3:RRP42:COP1:FAP7:NRP1:SEC31:TRM8:NHP2:SHS1:GCS1:PHO13:RRP8:RRP1:ARX1:TRM1:RPA14:YDR161W:TAF10:SEC7:UBC1:SLY1:RVB1:UME6:MNN10:CCC2:BCP1:UTP5:UTP6:NHX1:RMT2:GRH1:AGE1:RA…	715:8298:6400:45026:7131:6402:6403:6404:6405:9749:6260:6333:7062:6406:6334:6407:6408:7064:6409:7067:6265:6338:7068:6267:6268:31055:1324:6913:722:6842:723:5977:6412:6413:6414:6342:6415:6270:6271:2:6418:226:6272:48017:42493:154:7076:6348:1402:43001:1403:731:735:45041:46856:16192:45045:30846:30847:45047:16197:7155:6353:6426:6281:6354:162:6355:6357:6359:6289:9408:42144:742:42147:42148:747:749:6797:45…
9987	cellular process	550 out of 652 genes, 84.4%	4701 out of 7288 background genes, 64.5%	4.39e-29	ERP2:PMT2:POP5:RBG1:PTA1:GCV3:ECM1:NUP60:ADE1:SCT1:MCM2:NCL1:YBL055C:PRS4:ILS1:MAP2:PKC1:RER2:MNN2:KAP104:HMT1:TRM7:ALG14:RFC5:RXT2:PHO88:GRS1:MRPL36:SUP45:CNS1:TYR1:NPL4:SMY2:FZO1:MBA1:CDC47:KTR3:ENP1:HIS7:ARO4:DUT1:TRS20:TSC10:REI1:MRPL37:HSM3:SSH1:ILV6:GBP2:HIS4:RRP7:SRO9:APA1:PGK1:CWH43:FEN1:RRP43:PER1:PWP2:HCM1:PAT1:CDC39:MCD1:ERP3:SIR2:LHP1:SLC1:USO1:TSR1:GET3:QRI1:RRP42:COP1:RPC53:FAP7:NRP…	715:9098:7568:8298:8299:6696:6400:45026:7131:6402:6403:6404:6405:9749:6260:6333:7062:6406:6334:6407:6408:7064:6409:7067:6265:6338:7068:6267:6268:6269:31055:1324:6913:722:6915:6842:723:724:5977:16255:16259:6412:6413:6414:6342:6415:6270:6271:2:6418:226:6272:48017:154:42493:7076:6348:1402:43001:1403:15892:8380:731:735:19674:6857:6784:45041:46855:46856:16192:45045:30846:30847:45047:6350:16197:7155:63…
6996	organelle organization and biogenesis	224 out of 652 genes, 34.4%	1293 out of 7288 background genes, 17.7%	5.1e-24	POP5:RBG1:GCV3:ECM1:NUP60:NCL1:YBL055C:PRS4:PKC1:HMT1:RFC5:RXT2:PHO88:SMY2:FZO1:MBA1:ENP1:REI1:SSH1:GBP2:RRP7:SRO9:RRP43:PWP2:HCM1:MCD1:SIR2:TSR1:RRP42:FAP7:NRP1:TRM8:NHP2:GCS1:PHO13:RRP8:RRP1:ARX1:TRM1:RPA14:YDR161W:TAF10:UBC1:RVB1:UME6:MNN10:BCP1:UTP5:UTP6:NHX1:RMT2:GRH1:RAD23:RPL12A:NUG1:SPC25:TPA1:RNR1:VTC1:RAD51:NUP157:GLE2:SCS2:NSA2:OXA1:BEM2:VTC2:LOC1:NIC96:RSC8:RPB9:DBP3:NUP145:LSG1:NSA1:…	715:8298:6400:7131:6402:6404:6405:6260:6333:7062:6406:6334:6407:6408:7064:6409:7067:6265:6338:7068:31055:6913:722:6842:723:5977:6412:6413:6414:6342:6270:6271:2:226:6272:42493:154:7076:6348:43001:1403:731:735:16192:30846:45047:16197:6281:6354:162:6355:6357:6359:6289:42144:742:42148:747:6797:45053:8104:8033:9847:6360:7165:6364:7094:6365:6366:8610:6367:6368:6298:755:45132:6513:7243:46515:183:30433:6…
6364	rRNA processing	61 out of 652 genes, 9.4%	176 out of 7288 background genes, 2.4%	6.55e-19	POP5:ENP1:RRP7:RRP43:PWP2:TSR1:RRP42:FAP7:NHP2:RRP8:RRP1:UTP5:UTP6:NUG1:NSA2:DBP3:PRP43:RAI1:SLX9:RRP46:NOP7:UTP8:NSR1:SKI6:YGR251W:SBP1:RPP1:RRP4:IPI1:DBP8:UTP9:RIX1:NOP9:UTP10:MRT4:MAK11:UTP30:NOC3:SDO1:SIK1:UTP13:TSR2:UTP14:UTP15:NOP2:RIA1:RIO2:DBP6:REX4:RRP40:NOP8:UTP23:NOB1:NOP58:NOP4:NOG1:NAN1:NOP53:NIP7:RRP9:RRP15	6402:723:6270:154:30846:8033:6364:6365:6379:910:27:28:42254:42255:6979:30468:42273:42274:54:55:30489:30490:391:43248:16070:43330:7049:8283:31118
8152	metabolic process	415 out of 652 genes, 63.7%	3509 out of 7288 background genes, 48.1%	5.61e-14	PMT2:POP5:PTA1:GCV3:NUP60:ADE1:SCT1:MCM2:NCL1:YBL055C:PRS4:ILS1:MAP2:PKC1:RER2:MNN2:HMT1:TRM7:ALG14:RFC5:RXT2:GRS1:MRPL36:SUP45:CNS1:TYR1:NPL4:MBA1:CDC47:KTR3:ENP1:HIS7:ARO4:DUT1:TSC10:MRPL37:HSM3:ILV6:HIS4:RRP7:SRO9:APA1:PGK1:FEN1:RRP43:PER1:PWP2:HCM1:PAT1:CDC39:SIR2:LHP1:SLC1:USO1:TSR1:QRI1:RRP42:RPC53:FAP7:DLD2:TRM8:MRPL11:NHP2:SSB1:PHO13:LCB2:RRP8:RRP1:TRM1:ARO1:RPA14:HOM2:TAF10:RSM24:UBC1:RV…	715:9098:7568:8299:6696:6400:7131:6402:6404:9749:6260:6333:7062:6406:6334:6407:7064:6408:6409:7067:6265:6338:7068:6267:6268:6269:31055:1324:6913:722:6915:723:724:5977:16255:16259:6412:6413:6414:6342:6415:6270:6271:2:226:6418:6272:48017:154:42493:6348:1402:1403:19740:8380:731:735:19674:6857:6784:45041:46855:46856:16192:30846:30847:45047:6350:7155:6353:6426:6427:6281:6354:162:6355:6357:6359:6289:67…
44238	primary metabolic process	386 out of 652 genes, 59.2%	3207 out of 7288 background genes, 44.0%	2.37e-13	PMT2:POP5:PTA1:GCV3:NUP60:ADE1:SCT1:MCM2:NCL1:YBL055C:PRS4:ILS1:MAP2:PKC1:RER2:MNN2:HMT1:TRM7:ALG14:RFC5:RXT2:GRS1:MRPL36:SUP45:CNS1:TYR1:NPL4:CDC47:KTR3:ENP1:HIS7:ARO4:DUT1:TSC10:MRPL37:HSM3:ILV6:HIS4:RRP7:SRO9:APA1:PGK1:FEN1:RRP43:PER1:PWP2:HCM1:PAT1:CDC39:SIR2:LHP1:SLC1:USO1:TSR1:QRI1:RRP42:RPC53:FAP7:TRM8:MRPL11:NHP2:SSB1:PHO13:LCB2:RRP8:RRP1:TRM1:ARO1:RPA14:HOM2:TAF10:RSM24:UBC1:RVB1:MSS116:…	715:9098:7568:8299:6696:6400:7131:6402:6404:9749:6260:6333:7062:6406:6334:6407:7064:6408:6409:7067:6265:6338:7068:6267:6268:6269:31055:1324:6913:722:6915:723:724:5977:16255:16259:6412:6413:6414:6342:6415:6270:6271:2:226:6418:6272:48017:154:42493:6348:1402:1403:8380:731:735:19674:45041:46855:46856:16192:30846:30847:45047:6350:7155:6353:6426:6427:6281:6354:162:6355:6357:6359:6289:42148:747:749:1714…
44237	cellular metabolic process	404 out of 652 genes, 62.0%	3429 out of 7288 background genes, 47.0%	8.36e-13	PMT2:POP5:PTA1:GCV3:NUP60:ADE1:SCT1:MCM2:NCL1:YBL055C:PRS4:ILS1:MAP2:PKC1:RER2:MNN2:HMT1:TRM7:ALG14:RFC5:RXT2:GRS1:MRPL36:SUP45:CNS1:TYR1:NPL4:MBA1:CDC47:KTR3:ENP1:HIS7:ARO4:DUT1:TSC10:MRPL37:HSM3:ILV6:HIS4:RRP7:SRO9:APA1:PGK1:FEN1:RRP43:PER1:PWP2:HCM1:PAT1:CDC39:SIR2:LHP1:SLC1:TSR1:QRI1:RRP42:RPC53:FAP7:DLD2:TRM8:MRPL11:NHP2:SSB1:PHO13:LCB2:RRP8:RRP1:TRM1:ARO1:RPA14:HOM2:TAF10:RSM24:UBC1:RVB1:MS…	715:9098:7568:8299:6696:6400:7131:6402:6404:9749:6260:6333:7062:6406:6334:6407:7064:6408:6409:7067:6265:6338:7068:6267:6268:6269:31055:1324:6913:722:723:724:5977:16255:16259:6412:6413:6414:6342:6415:6270:6271:2:226:6418:6272:48017:154:42493:6348:1402:1403:8380:731:735:19674:6857:6784:45041:46855:46856:16192:30846:30847:45047:6350:7155:6353:6426:6427:6281:6354:162:6355:6357:6359:6289:6790:42148:74…
6396	RNA processing	82 out of 652 genes, 12.6%	368 out of 7288 background genes, 5.0%	1.3e-12	POP5:PTA1:ENP1:RRP7:RRP43:PWP2:CDC39:LHP1:TSR1:RRP42:FAP7:NHP2:RRP8:RRP1:MSS116:UTP5:UTP6:NUG1:LSM4:NSA2:BRR2:DEG1:DBP3:NUP145:PRP43:RAI1:SLX9:RRP46:NOP7:UTP8:NSR1:SKI6:YGR251W:SBP1:RPP1:RRP4:IPI1:NAM8:DBP8:UTP9:RIX1:NOT3:NOP9:TRL1:UTP10:MRT4:MAK11:SNU114:LOS1:UTP30:TRZ1:PRP19:NOC3:SDO1:SIK1:UTP13:TSR2:PRP39:RSE1:UTP14:RNA14:UTP15:NOP2:RIA1:RIO2:SMM1:DBP6:POP2:REX4:RRP40:NOP8:UTP23:NOB1:NOP58:NOP…	6400:6402:6406:6407:6408:6409:723:6270:154:8380:30846:30847:6357:749:8033:245:6364:6365:6368:6511:6376:6378:6379:6388:910:6606:6607:6608:6609:27:349:6396:28:42254:42255:6979:6610:6611:30969:288:289:30468:42779:42273:42274:50000:6999:54:55:30489:30490:16567:391:395:74:396:398:43248:16070:43330:122:7049:8283:7124:31118
16072	rRNA metabolic process	63 out of 652 genes, 9.7%	257 out of 7288 background genes, 3.5%	3.38e-11	POP5:ENP1:RRP7:RRP43:PWP2:TSR1:RRP42:FAP7:NHP2:RRP8:RRP1:UTP5:UTP6:NUG1:NSA2:DBP3:PRP43:RAI1:SLX9:RRP46:NOP7:UTP8:NSR1:SKI6:YGR251W:SBP1:RPP1:RRP4:IPI1:DBP8:UTP9:RIX1:NOP9:UTP10:MRT4:MAK11:UTP30:NOC3:SDO1:SIK1:UTP13:TSR2:UTP14:UTP15:RNA1:NOP2:RIA1:RIO2:DBP6:NOP12:REX4:RRP40:NOP8:UTP23:NOB1:NOP58:NOP4:NOG1:NAN1:NOP53:NIP7:RRP9:RRP15	6402:6404:6407:723:6270:154:30846:8033:6364:6365:6379:910:6606:27:28:42254:42255:6979:30468:42273:42274:54:55:30489:30490:391:43248:16070:16072:43330:7049:8283:31118
42273	ribosomal large subunit biogenesis and assembly	28 out of 652 genes, 4.3%	63 out of 7288 background genes, 0.9%	7.99e-11	REI1:ARX1:RPL12A:NSA2:LOC1:DBP3:NSA1:PRP43:NOP7:MRPL9:SSF1:IPI1:NMD3:RIX1:SQT1:ALB1:MRT4:MAK11:RSA3:RIA1:DBP6:BRX1:NOP8:RPL3:NOG1:RPL5:NIP7:RPL11A	8298:6402:6913:723:6412:747:6364:6365:27:278:42254:42273:54:55:30489:30490:391:7117:7049:8283:8361
6139	nucleobase, nucleoside, nucleotide and nucleic acid metabolic process	211 out of 652 genes, 32.4%	1510 out of 7288 background genes, 20.7%	1.8e-10	POP5:PTA1:ADE1:MCM2:NCL1:YBL055C:PRS4:TRM7:RFC5:RXT2:GRS1:CDC47:ENP1:HIS7:DUT1:HSM3:RRP7:APA1:RRP43:PWP2:HCM1:PAT1:CDC39:SIR2:LHP1:TSR1:QRI1:RRP42:RPC53:FAP7:TRM8:NHP2:PHO13:RRP8:RRP1:TRM1:RPA14:TAF10:RVB1:MSS116:UME6:UTP5:HPT1:ADE8:UTP6:GUK1:RBA50:EDC3:RAD23:POL5:NUG1:SRB4:TPA1:RNR1:RAD51:PRS2:LSM4:SCS2:NSA2:BRR2:DEG1:RSC8:NPY1:RPB9:DBP3:NUP145:ARC1:TAF6:PRP43:ITC1:ADE5,7:RAI1:SLX9:VAS1:RRP46:NO…	715:6400:7131:6402:6404:6406:6260:6333:7062:6334:6407:7064:6408:6409:7067:6265:6338:7068:6267:6268:6269:31055:722:723:724:6412:6413:6342:6270:6271:6418:6272:154:42493:6348:1403:8380:731:735:19674:30846:30847:45047:6350:6353:6426:6427:6281:6354:162:6355:6357:6359:6289:42148:747:749:8033:6431:6360:6436:245:6364:6438:6365:6366:6367:6368:6298:31087:45132:6511:6446:183:184:6376:30433:6378:6379:30437:6…
16070	RNA metabolic process	157 out of 652 genes, 24.1%	1022 out of 7288 background genes, 14.0%	3.65e-10	POP5:PTA1:NCL1:TRM7:RXT2:GRS1:ENP1:RRP7:RRP43:PWP2:HCM1:PAT1:CDC39:SIR2:LHP1:TSR1:RRP42:RPC53:FAP7:TRM8:NHP2:RRP8:RRP1:TRM1:RPA14:TAF10:RVB1:MSS116:UME6:UTP5:UTP6:RBA50:EDC3:POL5:NUG1:SRB4:TPA1:LSM4:SCS2:NSA2:BRR2:DEG1:RPB9:DBP3:NUP145:ARC1:TAF6:PRP43:ITC1:RAI1:SLX9:VAS1:RRP46:NOP7:SPT6:UTP8:NSR1:SKI6:YGR251W:BUD32:MES1:SBP1:RPP1:RRP4:STE12:IPI1:NAM8:DBP8:IKI1:UTP9:RIX1:RPB3:NOT3:MET18:NOP9:TRL1:…	6400:7131:6402:6404:6406:6333:6334:6407:6408:6409:6338:7068:6268:6269:723:724:6412:6413:6342:6270:6271:6418:42493:154:6348:1403:8380:735:30846:30847:45047:6353:6426:6427:6281:6354:6355:6357:6359:6289:747:749:8033:6431:6360:6436:245:6364:6438:6365:6366:6367:6368:6298:31087:6511:6446:183:184:6376:6378:6379:30437:6950:6451:335:7329:6383:6388:910:6020:46020:6606:6607:6608:6609:43488:6468:27:349:6396:…
51169	nuclear transport	37 out of 652 genes, 5.7%	115 out of 7288 background genes, 1.6%	1.42e-09	ECM1:NUP60:KAP104:HMT1:GBP2:BCP1:NUP157:GLE2:KAP123:NIC96:KAP122:NUP145:LSG1:ARC1:CSE1:NMD3:RIX1:APQ12:NUP159:NUP82:NUP85:NMD5:NUP100:LOS1:NUP133:NUP2:NDC1:NUP188:NUP53:RNA1:PSE1:HRB1:NUP1:MTR10:NOC2:NOG1:NOP53	6403:6404:6405:6406:6407:6408:6409:6913:723:6342:6418:42493:6348:747:6365:30437:6388:6606:6607:6608:6609:27:42254:42255:6610:6611:16973:42273:50000:6998:6999:54:55:59:30489:7020:16072:7103:7047:7049:18195:6259:8361
6913	nucleocytoplasmic transport	38 out of 652 genes, 5.8%	122 out of 7288 background genes, 1.7%	2.18e-09	ECM1:NUP60:KAP104:HMT1:REI1:GBP2:BCP1:NUP157:GLE2:KAP123:NIC96:KAP122:NUP145:LSG1:ARC1:CSE1:NMD3:RIX1:APQ12:NUP159:NUP82:NUP85:NMD5:NUP100:LOS1:NUP133:NUP2:NDC1:NUP188:NUP53:RNA1:PSE1:HRB1:NUP1:MTR10:NOC2:NOG1:NOP53	6403:6404:6405:6406:6407:6408:6409:6913:723:6342:6418:42493:6348:747:6365:30437:6388:6606:6607:6608:6609:27:278:42254:42255:6610:6611:16973:42273:50000:6998:6999:54:55:59:30489:7020:16072:7103:7117:7047:7049:18195:6259:8361
6611	protein export from nucleus	23 out of 652 genes, 3.5%	51 out of 7288 background genes, 0.7%	9.58e-09	ECM1:BCP1:NUP157:GLE2:NIC96:NUP145:LSG1:CSE1:NMD3:RIX1:NUP159:NUP82:NUP85:NUP100:NUP133:NUP2:NUP188:NUP53:RNA1:NUP1:NOC2:NOG1:NOP53	6404:6405:6406:6407:6408:6409:6342:6348:747:6365:30437:6388:6606:6607:6608:6609:27:42254:42255:6610:6611:42273:50000:6998:6999:54:55:59:30489:16072:7047:6259
6519	amino acid and derivative metabolic process	48 out of 652 genes, 7.4%	200 out of 7288 background genes, 2.7%	1e-07	GCV3:PRS4:GRS1:TYR1:HIS7:ARO4:ILV6:HIS4:ARO1:HOM2:TRP4:SAM2:PRO3:SAH1:HOM3:ILV1:TRP2:MET6:PRS2:ARC1:MUQ1:VAS1:SER2:MES1:PRS3:ARG4:THR1:DYS1:ARO9:SER33:HIS5:MET18:URA2:ILV3:CBF1:LIA1:BAT2:MAE1:TRP3:GCV2:LEU4:ARG1:PRS5:MET22:WRS1:HTS1:ARO7:YPR118W	9098:6333:6409:723:16259:226:6418:42493:6353:6426:6427:162:6289:6431:6436:6438:6366:8612:46515:6520:6526:19856:42254:6541:19509:6546:6549:6555:6561:52:6566:53:6207:6570:6646:9127:103:105:6730:6090:6166:9070:9072:9073:42538:9082:9083:9086:7059:6189:8361:9090:9092
51168	nuclear export	31 out of 652 genes, 4.8%	97 out of 7288 background genes, 1.3%	1.17e-07	ECM1:HMT1:GBP2:BCP1:NUP157:GLE2:NIC96:NUP145:LSG1:ARC1:CSE1:NMD3:RIX1:APQ12:NUP159:NUP82:NUP85:NUP100:LOS1:NUP133:NUP2:NDC1:NUP188:NUP53:RNA1:PSE1:HRB1:NUP1:NOC2:NOG1:NOP53	6404:6405:6406:6407:6408:6409:723:6342:6418:6348:747:6365:30437:6388:6606:6607:6608:6609:27:42254:42255:6610:6611:16973:42273:50000:6998:6999:54:55:59:30489:7020:16072:7103:7047:18195:6259
51170	nuclear import	21 out of 652 genes, 3.2%	48 out of 7288 background genes, 0.7%	1.58e-07	NUP60:KAP104:NUP157:GLE2:KAP123:NIC96:KAP122:NUP145:NUP82:NUP85:NMD5:NUP100:NUP133:NUP2:NDC1:NUP188:NUP53:RNA1:PSE1:NUP1:MTR10	6403:6404:6405:6406:6407:6408:6409:6913:723:6342:42493:6348:6388:6606:6607:6608:6609:6610:6611:50000:6998:6999:54:59:7020:16072:7103:7049:6259:8361
6606	protein import into nucleus	21 out of 652 genes, 3.2%	48 out of 7288 background genes, 0.7%	1.58e-07	NUP60:KAP104:NUP157:GLE2:KAP123:NIC96:KAP122:NUP145:NUP82:NUP85:NMD5:NUP100:NUP133:NUP2:NDC1:NUP188:NUP53:RNA1:PSE1:NUP1:MTR10	6403:6404:6405:6406:6407:6408:6409:6913:723:6342:42493:6348:6388:6606:6607:6608:6609:6610:6611:50000:6998:6999:54:59:7020:16072:7103:7049:6259:8361
9308	amine metabolic process	51 out of 652 genes, 7.8%	223 out of 7288 background genes, 3.1%	1.67e-07	GCV3:PRS4:GRS1:TYR1:HIS7:ARO4:TSC10:ILV6:HIS4:QRI1:ARO1:HOM2:TRP4:SAM2:PCM1:PRO3:SAH1:HOM3:ILV1:TRP2:MET6:PRS2:ARC1:MUQ1:VAS1:SER2:MES1:PRS3:ARG4:THR1:ARO9:SER33:HIS5:MET18:URA2:ILV3:CBF1:BAT2:MAE1:TRP3:GCV2:BCH1:LEU4:ABZ1:ARG1:PRS5:MET22:WRS1:HTS1:ARO7:YPR118W	9098:6333:6409:723:16259:6418:42493:6353:6426:6427:162:6289:6431:6436:6438:6366:6520:6526:19856:6893:42254:6038:6541:19509:6546:6549:6045:6048:6555:46482:6561:52:6566:53:6207:6570:6646:9127:103:105:6730:30148:6666:6090:6166:9070:9072:9073:42538:9082:9083:9086:7059:6189:8361:9090:9092
17038	protein import	30 out of 652 genes, 4.6%	93 out of 7288 background genes, 1.3%	1.82e-07	NUP60:KAP104:AFG3:NUP157:GLE2:KAP123:NIC96:KAP122:NUP145:TOM20:TIM44:DJP1:NUP82:PAM16:TIM17:NUP85:NMD5:NUP100:PAM17:NUP133:NUP2:NDC1:NUP188:NUP53:RNA1:PSE1:MAS6:NUP1:MTR10:MGE1	6403:6404:6405:6406:6407:6408:6409:6913:723:6412:6342:42493:6348:45041:6508:6388:6606:6607:6461:6608:6609:6465:6610:6611:50000:6998:6999:54:59:16558:7020:16072:7103:30150:7049:6259:8361
30490	processing of 20S pre-rRNA	20 out of 652 genes, 3.1%	44 out of 7288 background genes, 0.6%	1.86e-07	PWP2:FAP7:UTP5:UTP6:PRP43:NOP7:UTP8:UTP9:UTP10:SIK1:UTP13:TSR2:UTP14:UTP15:RIO2:UTP23:NOB1:NOP58:NAN1:RRP9	154:6364:6365:910:42254:6979:30468:42273:42274:30489:30490:391:43248:7049:8283
6520	amino acid metabolic process	45 out of 652 genes, 6.9%	185 out of 7288 background genes, 2.5%	2.46e-07	GCV3:PRS4:GRS1:TYR1:HIS7:ARO4:ILV6:HIS4:ARO1:HOM2:TRP4:SAM2:PRO3:SAH1:HOM3:ILV1:TRP2:MET6:PRS2:ARC1:VAS1:SER2:MES1:PRS3:ARG4:THR1:ARO9:SER33:HIS5:MET18:URA2:ILV3:CBF1:BAT2:MAE1:TRP3:GCV2:LEU4:ARG1:PRS5:MET22:WRS1:HTS1:ARO7:YPR118W	9098:6333:6409:723:16259:6418:42493:6353:6426:6427:162:6289:6431:6436:6438:6366:6520:6526:19856:42254:6541:19509:6546:6549:6555:6561:52:6566:53:6207:6570:9127:103:105:6730:6090:6166:9070:9072:9073:42538:9082:9083:9086:7059:6189:8361:9090:9092
46907	intracellular transport	90 out of 652 genes, 13.8%	526 out of 7288 background genes, 7.2%	4.42e-07	ERP2:ECM1:NUP60:RER2:KAP104:HMT1:TRS20:REI1:SSH1:GBP2:USO1:GET3:COP1:SEC31:GCS1:SEC7:SLY1:CCC2:BCP1:NHX1:AGE1:AFG3:NUP157:GLE2:KAP123:SCS2:EMP47:NIC96:RET2:KAP122:NUP145:LSG1:ARC1:TIP20:CSE1:TOM20:APL6:GGA2:NMD3:CTR2:RIX1:TIM44:APQ12:NUP159:DJP1:NUP82:EXO70:PAM16:TIM17:VPS35:LAA1:NUP85:NMD5:NUP100:APL2:LOS1:VPS1:PAM17:NUP133:SEC22:NUP2:SUR4:VPS33:YPT7:NDC1:VPS9:NUP188:SEC65:NUP53:RNA1:BCH1:RSN1:P…	6403:6404:6405:6406:6407:6408:6409:6913:723:6412:6342:6418:42493:6348:43001:45041:16192:45047:16197:9408:42144:42147:747:8104:45053:6508:6365:10038:6879:19408:30433:30437:30004:6886:6887:6888:11:6458:6388:910:6020:6890:6891:6892:6893:6895:6896:6897:6606:6607:6461:6608:6609:6465:43488:27:278:42254:42255:6038:6610:6611:6613:6617:30469:30036:30037:6620:6623:6626:6486:16973:42273:50000:45324:15672:69…
6725	aromatic compound metabolic process	22 out of 652 genes, 3.4%	56 out of 7288 background genes, 0.8%	7.18e-07	PRS4:TYR1:ARO4:ARO1:TRP4:ADE8:TRP2:PRS2:ADE5,7:PRS3:ARO9:URA2:TRP3:MTD1:APT1:URA5:ADE4:ABZ1:PRS5:ADE2:DFR1:ARO7	723:162:19856:42254:6541:46482:6207:9113:6570:6144:105:46084:6730:6164:6166:6167:6168:9072:9073:6189:8361:6760
6807	nitrogen compound metabolic process	52 out of 652 genes, 8.0%	244 out of 7288 background genes, 3.3%	1.63e-06	GCV3:PRS4:GRS1:TYR1:HIS7:ARO4:TSC10:ILV6:HIS4:QRI1:ARO1:HOM2:TRP4:ATO3:SAM2:PCM1:PRO3:SAH1:HOM3:ILV1:TRP2:MET6:PRS2:ARC1:MUQ1:VAS1:SER2:MES1:PRS3:ARG4:THR1:ARO9:SER33:HIS5:MET18:URA2:ILV3:CBF1:BAT2:MAE1:TRP3:GCV2:BCH1:LEU4:ABZ1:ARG1:PRS5:MET22:WRS1:HTS1:ARO7:YPR118W	9098:6333:6409:723:16259:6418:42493:19740:6353:6426:6427:162:6289:6431:6436:6438:6366:6520:6526:19856:6893:42254:6038:6541:19509:6546:6549:6045:6048:6555:46482:6561:52:6566:53:6207:6570:6646:9127:15696:103:105:6730:30148:6666:6090:6166:9070:9072:9073:42538:9082:9083:9086:7059:6189:8361:9090:9092
9126	purine nucleoside monophosphate metabolic process	12 out of 652 genes, 1.8%	18 out of 7288 background genes, 0.2%	2.72e-06	ADE1:PRS4:HIS7:ADE8:GUK1:PRS2:ADE5,7:PRS3:APT1:ADE4:PRS5:ADE2	723:42493:162:42254:46037:6207:6144:9127:105:46084:6164:6166:6167:6168:6189:8361
22618	protein-RNA complex assembly	36 out of 652 genes, 5.5%	140 out of 7288 background genes, 1.9%	3.27e-06	RRP7:PAT1:RPL12A:PAB1:BRR2:DBP3:NSR1:MRPL9:SSF1:IPI1:NAM8:NMD3:RIX1:SQT1:TIF2:SUI2:MAK11:SNU114:RSA3:GCD7:PRP39:RSE1:NIP1:DBP6:BRX1:REX4:CDC33:RRP40:NOP8:RPL3:NOC2:GCD1:PRT1:RPL5:NIP7:RPL11A	6402:723:6412:6413:747:245:6364:6365:6446:184:6376:27:349:28:42254:42255:290:42273:54:55:30489:74:395:396:398:7059:8361
6609	mRNA-binding (hnRNP) protein import into nucleus	14 out of 652 genes, 2.1%	25 out of 7288 background genes, 0.3%	3.28e-06	KAP104:NUP157:GLE2:NIC96:NUP145:NUP82:NUP85:NUP100:NUP133:NUP2:NUP188:NUP53:NUP1:MTR10	6403:6404:6405:6406:6407:6408:6409:6342:6348:6388:6606:6607:6608:6609:6610:6611:50000:6998:6999:59:7049:6259
6605	protein targeting	51 out of 652 genes, 7.8%	245 out of 7288 background genes, 3.4%	5.54e-06	ECM1:NUP60:KAP104:SSH1:BCP1:AFG3:NUP157:GLE2:KAP123:SCS2:NIC96:KAP122:NUP145:LSG1:CSE1:TOM20:GGA2:NMD3:RIX1:TIM44:NUP159:DJP1:NUP82:PAM16:TIM17:NUP85:NMD5:NUP100:VPS1:PAM17:NUP133:NUP2:NDC1:VPS9:NUP188:SEC65:NUP53:RNA1:PSE1:YDJ1:MAS6:NUP1:MTR10:NOC2:MGE1:VTS1:NOG1:SEC62:NOP53:SRP72:SRP68	6403:6404:6405:6406:6407:6408:6409:6913:723:6412:6342:42493:6348:45041:45047:747:45053:6508:6365:30433:30437:6458:6388:6020:6895:6896:6606:6607:6461:6608:6609:6465:43488:27:42254:42255:6610:6611:6613:6617:30036:6620:6623:6626:42273:50000:6998:6999:54:55:59:30489:16558:7020:16072:7103:7031:7034:43328:30150:42026:7047:7049:6259:8361
51649	establishment of cellular localization	94 out of 652 genes, 14.4%	586 out of 7288 background genes, 8.0%	5.71e-06	ERP2:ECM1:NUP60:RER2:KAP104:HMT1:TRS20:REI1:SSH1:GBP2:ERP3:USO1:GET3:COP1:SEC31:GCS1:SEC7:SLY1:CCC2:BCP1:NHX1:AGE1:AFG3:NUP157:GLE2:KAP123:SCS2:EMP47:NIC96:RET2:KAP122:NUP145:LSG1:ARC1:TIP20:CSE1:TOM20:APL6:OSH3:GGA2:NMD3:CTR2:RIX1:TIM44:APQ12:NUP159:DJP1:NUP82:EXO70:PAM16:TIM17:VPS35:LAA1:NUP85:NMD5:NUP100:APL2:LOS1:SAC1:VPS1:PAM17:NUP133:SEC22:NUP2:SUR4:VPS33:SEC39:YPT7:NDC1:VPS9:NUP188:SEC65:N…	6403:6404:6405:6406:6407:6408:6409:6913:723:6412:6342:6418:48017:42493:6348:43001:1403:45041:46856:16192:45045:45047:16197:9408:42144:742:42147:747:8104:45053:6508:6365:10038:17157:6879:19408:30433:30437:30004:6886:6887:6888:11:6458:6388:910:6020:6890:6891:6892:6893:6895:6896:6897:6606:6607:6461:6608:6609:6465:43488:27:278:42254:42255:6038:6610:6611:6613:6617:30469:30036:30037:6620:6623:6626:6486…
51029	rRNA transport	14 out of 652 genes, 2.1%	26 out of 7288 background genes, 0.4%	6.54e-06	NUP157:GLE2:NIC96:NUP145:NUP159:NUP82:NUP85:NUP100:NUP133:NUP2:NUP188:NUP53:RNA1:NUP1	6404:6405:6406:6407:6408:6409:6342:6348:6388:6606:6607:6608:6609:6610:6611:50000:6998:6999:54:59:16072:6259
6407	rRNA export from nucleus	14 out of 652 genes, 2.1%	26 out of 7288 background genes, 0.4%	6.54e-06	NUP157:GLE2:NIC96:NUP145:NUP159:NUP82:NUP85:NUP100:NUP133:NUP2:NUP188:NUP53:RNA1:NUP1	6404:6405:6406:6407:6408:6409:6342:6348:6388:6606:6607:6608:6609:6610:6611:50000:6998:6999:54:59:16072:6259
9123	nucleoside monophosphate metabolic process	12 out of 652 genes, 1.8%	19 out of 7288 background genes, 0.3%	6.8e-06	ADE1:PRS4:HIS7:ADE8:GUK1:PRS2:ADE5,7:PRS3:APT1:ADE4:PRS5:ADE2	723:42493:162:42254:46037:6207:6144:9127:105:46084:6164:6166:6167:6168:6189:8361
9127	purine nucleoside monophosphate biosynthetic process	11 out of 652 genes, 1.7%	16 out of 7288 background genes, 0.2%	7.94e-06	ADE1:PRS4:HIS7:ADE8:PRS2:ADE5,7:PRS3:APT1:ADE4:PRS5:ADE2	723:42493:162:42254:6207:6144:9127:105:46084:6164:6166:6167:6168:6189:8361
45184	establishment of protein localization	55 out of 652 genes, 8.4%	279 out of 7288 background genes, 3.8%	1.06e-05	ECM1:NUP60:KAP104:SSH1:BCP1:AFG3:NUP157:GLE2:KAP123:SCS2:OXA1:NIC96:KAP122:NUP145:LSG1:CSE1:TOM20:GGA2:NMD3:RIX1:TIM44:NUP159:DJP1:NUP82:PAM16:TIM17:NUP85:NMD5:NUP100:VPS1:PAM17:NUP133:NUP2:NDC1:VPS9:NUP188:SEC65:NUP53:RNA1:PSE1:YDJ1:MAS6:MDM38:NUP1:MTR10:NOC2:MGE1:VTS1:MRS6:NOG1:SEC62:NOP53:SRP72:SRP68:YLH47	6403:6404:6405:6406:6407:6408:6409:6913:723:6412:6342:42493:6348:45041:45047:747:45053:6508:6365:30433:30437:32979:6886:30007:6458:51204:6388:6020:6895:6896:6606:6607:6461:6608:6609:6465:43488:27:42254:42255:6610:6611:6613:6617:30036:6620:6623:6626:42273:50000:6998:6999:54:55:59:7005:30489:16558:7020:16072:7103:7031:7034:43328:30150:6813:42026:7047:7049:6259:8361
51641	cellular localization	97 out of 652 genes, 14.9%	623 out of 7288 background genes, 8.5%	1.53e-05	ERP2:ECM1:NUP60:RER2:KAP104:HMT1:TRS20:REI1:SSH1:GBP2:ERP3:USO1:GET3:COP1:SEC31:GCS1:SEC7:SLY1:CCC2:BCP1:NHX1:AGE1:AFG3:NUP157:GLE2:KAP123:SCS2:OXA1:EMP47:NIC96:RET2:KAP122:NUP145:LSG1:ARC1:TIP20:CSE1:TOM20:APL6:OSH3:GGA2:NMD3:CTR2:RIX1:TIM44:APQ12:NUP159:DJP1:NUP82:EXO70:PAM16:TIM17:VPS35:LAA1:NUP85:NMD5:NUP100:APL2:LOS1:SAC1:VPS1:PAM17:NUP133:SEC22:NUP2:SUR4:VPS33:SEC39:YPT7:NDC1:VPS9:NUP188:SE…	6403:6404:6405:6406:6407:6408:6409:6913:723:6412:6342:6418:48017:42493:6348:43001:1403:45041:46856:16192:45045:45047:16197:9408:42144:742:42147:747:8104:45053:6508:6365:10038:17157:6879:19408:30433:30437:32979:30004:6886:30007:6887:6888:11:6458:51204:6388:910:6020:6890:6891:6892:6893:6895:6896:6897:6606:6607:6461:6608:6609:6465:43488:27:278:42254:42255:6038:6610:6611:6613:6617:30469:30036:30037:6…
42255	ribosome assembly	22 out of 652 genes, 3.4%	65 out of 7288 background genes, 0.9%	1.87e-05	RRP7:RPL12A:DBP3:NSR1:MRPL9:SSF1:IPI1:NMD3:RIX1:SQT1:MAK11:RSA3:DBP6:BRX1:REX4:RRP40:NOP8:RPL3:NOC2:RPL5:NIP7:RPL11A	6402:723:6412:747:6364:6365:27:28:42254:42255:42273:54:55:30489:8361
6886	intracellular protein transport	52 out of 652 genes, 8.0%	261 out of 7288 background genes, 3.6%	1.88e-05	ECM1:NUP60:KAP104:SSH1:BCP1:AFG3:NUP157:GLE2:KAP123:SCS2:NIC96:KAP122:NUP145:LSG1:CSE1:TOM20:GGA2:NMD3:RIX1:TIM44:NUP159:DJP1:NUP82:PAM16:TIM17:NUP85:NMD5:NUP100:VPS1:PAM17:NUP133:NUP2:NDC1:VPS9:NUP188:SEC65:NUP53:RNA1:PSE1:YDJ1:MAS6:NUP1:MTR10:NOC2:MGE1:VTS1:MRS6:NOG1:SEC62:NOP53:SRP72:SRP68	6403:6404:6405:6406:6407:6408:6409:6913:723:6412:6342:42493:6348:45041:45047:747:45053:6508:6365:30433:30437:6886:6458:6388:6020:6895:6896:6606:6607:6461:6608:6609:6465:43488:27:42254:42255:6610:6611:6613:6617:30036:6620:6623:6626:42273:50000:6998:6999:54:55:59:30489:16558:7020:16072:7103:7031:7034:43328:30150:42026:7047:7049:6259:8361
9124	nucleoside monophosphate biosynthetic process	11 out of 652 genes, 1.7%	17 out of 7288 background genes, 0.2%	2.07e-05	ADE1:PRS4:HIS7:ADE8:PRS2:ADE5,7:PRS3:APT1:ADE4:PRS5:ADE2	723:42493:162:42254:6207:6144:9127:105:46084:6164:6166:6167:6168:6189:8361
9161	ribonucleoside monophosphate metabolic process	11 out of 652 genes, 1.7%	17 out of 7288 background genes, 0.2%	2.07e-05	ADE1:PRS4:ADE8:GUK1:PRS2:ADE5,7:PRS3:APT1:ADE4:PRS5:ADE2	723:42493:162:42254:46037:6207:6144:105:46084:6164:6166:6167:6168:6189:8361
9167	purine ribonucleoside monophosphate metabolic process	11 out of 652 genes, 1.7%	17 out of 7288 background genes, 0.2%	2.07e-05	ADE1:PRS4:ADE8:GUK1:PRS2:ADE5,7:PRS3:APT1:ADE4:PRS5:ADE2	723:42493:162:42254:46037:6207:6144:105:46084:6164:6166:6167:6168:6189:8361
6365	35S primary transcript processing	25 out of 652 genes, 3.8%	82 out of 7288 background genes, 1.1%	2.23e-05	ENP1:RRP7:RRP43:PWP2:RRP42:NHP2:DBP3:PRP43:RRP46:SKI6:YGR251W:SBP1:RRP4:IPI1:DBP8:RIX1:UTP30:SDO1:SIK1:DBP6:RRP40:UTP23:NOP58:NOG1:RRP9	6402:154:6364:6365:910:27:28:42254:42255:30468:42273:54:30489:30490:391:16070:43330:31118
6999	nuclear pore organization and biogenesis	14 out of 652 genes, 2.1%	28 out of 7288 background genes, 0.4%	2.29e-05	NUP157:GLE2:NIC96:NUP145:SNL1:NUP159:NUP82:NUP85:NUP100:NUP133:NUP2:NUP188:NUP53:NUP1	6405:6406:6407:6408:6409:6342:6348:6457:6388:6606:6607:6608:6609:6610:6611:50000:6998:6999:54:59:6259
27	ribosomal large subunit assembly and maintenance	17 out of 652 genes, 2.6%	41 out of 7288 background genes, 0.6%	2.44e-05	RPL12A:DBP3:MRPL9:SSF1:IPI1:NMD3:RIX1:SQT1:MAK11:RSA3:DBP6:BRX1:NOP8:RPL3:RPL5:NIP7:RPL11A	6412:747:6364:6365:27:42254:42273:54:55:30489:8361
9072	aromatic amino acid family metabolic process	12 out of 652 genes, 1.8%	21 out of 7288 background genes, 0.3%	3.35e-05	PRS4:TYR1:ARO4:ARO1:TRP4:TRP2:PRS2:PRS3:ARO9:TRP3:PRS5:ARO7	723:162:42254:6207:6570:105:6166:9072:9073:6189:8361
8104	protein localization	58 out of 652 genes, 8.9%	312 out of 7288 background genes, 4.3%	3.83e-05	ECM1:NUP60:KAP104:SSH1:BCP1:AFG3:NUP157:GLE2:KAP123:SCS2:OXA1:VTC2:NIC96:KAP122:NUP145:LSG1:CSE1:TOM20:GGA2:NMD3:RIX1:TIM44:NUP159:DJP1:NUP82:PAM16:TIM17:VPS35:LAA1:NUP85:NMD5:NUP100:VPS1:PAM17:NUP133:NUP2:NDC1:VPS9:NUP188:SEC65:NUP53:RNA1:PSE1:YDJ1:MAS6:MDM38:NUP1:MTR10:NOC2:MGE1:VTS1:MRS6:NOG1:SEC62:NOP53:SRP72:SRP68:YLH47	6403:6404:6405:6406:6407:6408:6409:6913:723:6412:6342:42493:6348:45041:45047:42144:42147:747:45053:8104:6508:6365:30433:30437:32979:6886:30007:6458:51204:6388:6020:6895:6896:6606:6607:6461:6608:6609:6465:43488:27:42254:42255:6610:6611:6613:6617:30036:6620:6623:6626:42273:50000:6998:6999:54:55:59:7005:30489:16558:7020:16072:7103:7031:7034:43328:30150:6813:42026:7047:7049:6259:8361
51031	tRNA transport	14 out of 652 genes, 2.1%	29 out of 7288 background genes, 0.4%	4.07e-05	NUP157:GLE2:NIC96:NUP145:ARC1:NUP82:NUP85:NUP100:LOS1:NUP133:NUP2:NUP188:NUP53:NUP1	6405:6406:6407:6408:6409:6342:6418:6348:6388:6606:6607:6608:6609:6610:6611:50000:6998:6999:59:6259
6409	tRNA export from nucleus	14 out of 652 genes, 2.1%	29 out of 7288 background genes, 0.4%	4.07e-05	NUP157:GLE2:NIC96:NUP145:ARC1:NUP82:NUP85:NUP100:LOS1:NUP133:NUP2:NUP188:NUP53:NUP1	6405:6406:6407:6408:6409:6342:6418:6348:6388:6606:6607:6608:6609:6610:6611:50000:6998:6999:59:6259
15031	protein transport	52 out of 652 genes, 8.0%	267 out of 7288 background genes, 3.7%	4.16e-05	ECM1:NUP60:KAP104:SSH1:BCP1:AFG3:NUP157:GLE2:KAP123:SCS2:NIC96:KAP122:NUP145:LSG1:CSE1:TOM20:GGA2:NMD3:RIX1:TIM44:NUP159:DJP1:NUP82:PAM16:TIM17:NUP85:NMD5:NUP100:VPS1:PAM17:NUP133:NUP2:NDC1:VPS9:NUP188:SEC65:NUP53:RNA1:PSE1:YDJ1:MAS6:NUP1:MTR10:NOC2:MGE1:VTS1:MRS6:NOG1:SEC62:NOP53:SRP72:SRP68	6403:6404:6405:6406:6407:6408:6409:6913:723:6412:6342:42493:6348:45041:45047:747:45053:6508:6365:30433:30437:6886:6458:6388:6020:6895:6896:6606:6607:6461:6608:6609:6465:43488:27:42254:42255:6610:6611:6613:6617:30036:6620:6623:6626:42273:50000:6998:6999:54:55:59:30489:16558:7020:16072:7103:7031:7034:43328:30150:42026:7047:7049:6259:8361
6399	tRNA metabolic process	30 out of 652 genes, 4.6%	115 out of 7288 background genes, 1.6%	4.81e-05	POP5:PTA1:NCL1:TRM7:GRS1:LHP1:TRM8:TRM1:NUP145:ARC1:VAS1:MES1:RPP1:IKI1:TRL1:GCD14:KTI12:LOS1:TRZ1:DUS4:TRM12:TRM9:DUS1:SMM1:RIB2:TRM10:WRS1:TRM11:PUS1:HTS1	6400:6406:6407:6408:6409:6412:6418:30846:30847:6353:6426:6427:6357:8033:6431:6436:6364:6438:6378:6379:6950:6388:6606:6607:6608:6609:42254:6610:6611:30969:42779:50000:6999:16049:30488:9231:31119
8652	amino acid biosynthetic process	28 out of 652 genes, 4.3%	103 out of 7288 background genes, 1.4%	5.19e-05	PRS4:HIS7:ARO4:ILV6:HIS4:ARO1:HOM2:TRP4:PRO3:HOM3:ILV1:TRP2:MET6:PRS2:SER2:PRS3:ARG4:SER33:HIS5:ILV3:CBF1:BAT2:TRP3:LEU4:ARG1:PRS5:MET22:ARO7	9098:6333:723:42493:162:6526:42254:6555:6561:52:6566:53:6207:9127:103:105:6166:9070:9073:42538:9082:9083:9086:7059:6189:8361:9090
19752	carboxylic acid metabolic process	57 out of 652 genes, 8.7%	308 out of 7288 background genes, 4.2%	5.96e-05	GCV3:PRS4:GRS1:TYR1:HIS7:ARO4:ILV6:HIS4:PGK1:FEN1:DLD2:ARO1:HOM2:TRP4:SAM2:PRO3:SAH1:HOM3:ILV1:TRP2:MET6:PRS2:ARC1:VAS1:SER2:MES1:PRS3:ARG4:THR1:ARO9:SER33:HIS5:KGD1:MET18:URA2:ELO1:ILV3:CBF1:BAT2:MAE1:ACP1:TRP3:SUR4:GCV2:LEU4:ABZ1:ARG1:PRS5:MET22:WRS1:DFR1:ALD6:FAS2:HTS1:ARO7:YPR118W:ANT1	9098:6333:6409:723:16259:6418:42493:16192:6353:6426:6427:162:6289:6431:6436:6438:6366:6520:19413:6526:19856:6892:6103:42254:6541:19509:6546:19368:6549:18065:6555:46482:6633:6561:6635:52:6566:53:6207:6570:30497:9127:103:105:6089:6730:30148:7031:6090:6166:6094:6096:9070:6099:9072:9073:42538:15867:9082:9083:9086:7059:6189:8361:9090:9092:6760
6082	organic acid metabolic process	57 out of 652 genes, 8.7%	308 out of 7288 background genes, 4.2%	5.96e-05	GCV3:PRS4:GRS1:TYR1:HIS7:ARO4:ILV6:HIS4:PGK1:FEN1:DLD2:ARO1:HOM2:TRP4:SAM2:PRO3:SAH1:HOM3:ILV1:TRP2:MET6:PRS2:ARC1:VAS1:SER2:MES1:PRS3:ARG4:THR1:ARO9:SER33:HIS5:KGD1:MET18:URA2:ELO1:ILV3:CBF1:BAT2:MAE1:ACP1:TRP3:SUR4:GCV2:LEU4:ABZ1:ARG1:PRS5:MET22:WRS1:DFR1:ALD6:FAS2:HTS1:ARO7:YPR118W:ANT1	9098:6333:6409:723:16259:6418:42493:16192:6353:6426:6427:162:6289:6431:6436:6438:6366:6520:19413:6526:19856:6892:6103:42254:6541:19509:6546:19368:6549:18065:6555:46482:6633:6561:6635:52:6566:53:6207:6570:30497:9127:103:105:6089:6730:30148:7031:6090:6166:6094:6096:9070:6099:9072:9073:42538:15867:9082:9083:9086:7059:6189:8361:9090:9092:6760
9156	ribonucleoside monophosphate biosynthetic process	10 out of 652 genes, 1.5%	15 out of 7288 background genes, 0.2%	6.21e-05	ADE1:PRS4:ADE8:PRS2:ADE5,7:PRS3:APT1:ADE4:PRS5:ADE2	723:42493:162:42254:6207:6144:105:46084:6164:6166:6167:6168:6189:8361
9168	purine ribonucleoside monophosphate biosynthetic process	10 out of 652 genes, 1.5%	15 out of 7288 background genes, 0.2%	6.21e-05	ADE1:PRS4:ADE8:PRS2:ADE5,7:PRS3:APT1:ADE4:PRS5:ADE2	723:42493:162:42254:6207:6144:105:46084:6164:6166:6167:6168:6189:8361
44271	nitrogen compound biosynthetic process	29 out of 652 genes, 4.4%	111 out of 7288 background genes, 1.5%	7.8e-05	PRS4:HIS7:ARO4:ILV6:HIS4:ARO1:HOM2:TRP4:PRO3:HOM3:ILV1:TRP2:MET6:PRS2:MUQ1:SER2:PRS3:ARG4:SER33:HIS5:ILV3:CBF1:BAT2:TRP3:LEU4:ARG1:PRS5:MET22:ARO7	9098:6333:723:42493:162:6526:42254:6555:6561:52:6566:53:6207:6646:9127:103:105:6166:9070:9073:42538:9082:9083:9086:7059:6189:8361:9090
9309	amine biosynthetic process	29 out of 652 genes, 4.4%	111 out of 7288 background genes, 1.5%	7.8e-05	PRS4:HIS7:ARO4:ILV6:HIS4:ARO1:HOM2:TRP4:PRO3:HOM3:ILV1:TRP2:MET6:PRS2:MUQ1:SER2:PRS3:ARG4:SER33:HIS5:ILV3:CBF1:BAT2:TRP3:LEU4:ARG1:PRS5:MET22:ARO7	9098:6333:723:42493:162:6526:42254:6555:6561:52:6566:53:6207:6646:9127:103:105:6166:9070:9073:42538:9082:9083:9086:7059:6189:8361:9090
42257	ribosomal subunit assembly	19 out of 652 genes, 2.9%	54 out of 7288 background genes, 0.7%	8.68e-05	RRP7:RPL12A:DBP3:NSR1:MRPL9:SSF1:IPI1:NMD3:RIX1:SQT1:MAK11:RSA3:DBP6:BRX1:NOP8:RPL3:RPL5:NIP7:RPL11A	723:6412:747:6364:6365:27:28:42254:42273:54:55:30489:8361
51030	snRNA transport	12 out of 652 genes, 1.8%	23 out of 7288 background genes, 0.3%	0.00013	NUP157:GLE2:NIC96:NUP145:NUP82:NUP85:NUP100:NUP133:NUP2:NUP188:NUP53:NUP1	6405:6406:6407:6408:6409:6342:6348:6388:6606:6607:6608:6609:6610:6611:50000:6998:6999:59:6259
6408	snRNA export from nucleus	12 out of 652 genes, 1.8%	23 out of 7288 background genes, 0.3%	0.00013	NUP157:GLE2:NIC96:NUP145:NUP82:NUP85:NUP100:NUP133:NUP2:NUP188:NUP53:NUP1	6405:6406:6407:6408:6409:6342:6348:6388:6606:6607:6608:6609:6610:6611:50000:6998:6999:59:6259
6607	NLS-bearing substrate import into nucleus	12 out of 652 genes, 1.8%	23 out of 7288 background genes, 0.3%	0.00013	NUP157:GLE2:NIC96:NUP145:NUP82:NUP85:NUP100:NUP133:NUP2:NUP188:NUP53:NUP1	6405:6406:6407:6408:6409:6342:6348:6388:6606:6607:6608:6609:6610:6611:50000:6998:6999:59:6259
6608	snRNP protein import into nucleus	12 out of 652 genes, 1.8%	23 out of 7288 background genes, 0.3%	0.00013	NUP157:GLE2:NIC96:NUP145:NUP82:NUP85:NUP100:NUP133:NUP2:NUP188:NUP53:NUP1	6405:6406:6407:6408:6409:6342:6348:6388:6606:6607:6608:6609:6610:6611:50000:6998:6999:59:6259
6610	ribosomal protein import into nucleus	12 out of 652 genes, 1.8%	23 out of 7288 background genes, 0.3%	0.00013	NUP157:GLE2:NIC96:NUP145:NUP82:NUP85:NUP100:NUP133:NUP2:NUP188:NUP53:NUP1	6405:6406:6407:6408:6409:6342:6348:6388:6606:6607:6608:6609:6610:6611:50000:6998:6999:59:6259
9073	aromatic amino acid family biosynthetic process	10 out of 652 genes, 1.5%	16 out of 7288 background genes, 0.2%	0.00015	PRS4:ARO4:ARO1:TRP4:TRP2:PRS2:PRS3:TRP3:PRS5:ARO7	723:162:42254:6207:105:6166:9073:6189:8361
50657	nucleic acid transport	23 out of 652 genes, 3.5%	78 out of 7288 background genes, 1.1%	0.00016	HMT1:GBP2:NUP157:GLE2:NIC96:NUP145:ARC1:APQ12:NUP159:NUP82:NUP85:NUP100:LOS1:NUP133:NUP2:NDC1:NUP188:NUP53:RNA1:PSE1:HRB1:NUP1:MTR10	6403:6404:6405:6406:6407:6408:6409:723:6342:6418:6348:6388:6606:6607:6608:6609:42254:6610:6611:16973:50000:6998:6999:54:59:7020:16072:7103:18195:6259
50658	RNA transport	23 out of 652 genes, 3.5%	78 out of 7288 background genes, 1.1%	0.00016	HMT1:GBP2:NUP157:GLE2:NIC96:NUP145:ARC1:APQ12:NUP159:NUP82:NUP85:NUP100:LOS1:NUP133:NUP2:NDC1:NUP188:NUP53:RNA1:PSE1:HRB1:NUP1:MTR10	6403:6404:6405:6406:6407:6408:6409:723:6342:6418:6348:6388:6606:6607:6608:6609:42254:6610:6611:16973:50000:6998:6999:54:59:7020:16072:7103:18195:6259
51236	establishment of RNA localization	23 out of 652 genes, 3.5%	78 out of 7288 background genes, 1.1%	0.00016	HMT1:GBP2:NUP157:GLE2:NIC96:NUP145:ARC1:APQ12:NUP159:NUP82:NUP85:NUP100:LOS1:NUP133:NUP2:NDC1:NUP188:NUP53:RNA1:PSE1:HRB1:NUP1:MTR10	6403:6404:6405:6406:6407:6408:6409:723:6342:6418:6348:6388:6606:6607:6608:6609:42254:6610:6611:16973:50000:6998:6999:54:59:7020:16072:7103:18195:6259
19438	aromatic compound biosynthetic process	10 out of 652 genes, 1.5%	17 out of 7288 background genes, 0.2%	0.00034	PRS4:ARO4:ARO1:TRP4:TRP2:PRS2:PRS3:TRP3:PRS5:ARO7	723:162:42254:6207:105:6166:9073:6189:8361
32502	developmental process	113 out of 652 genes, 17.3%	808 out of 7288 background genes, 11.1%	0.00036	NUP60:MCM2:YBL055C:RXT2:CDC47:RRP7:PWP2:PAT1:CDC39:SIR2:USO1:SHS1:RPA14:TAF10:UBC1:UME6:RPL12A:AFG3:GAL83:RAD51:BOI2:SHO1:SCS2:BEM2:PAB1:BRR2:BMH1:KAP122:DBP3:LSG1:TAF6:ITC1:CDC55:SPT6:RSR1:NSR1:MRPL9:BUD32:LAG1:PRS3:GIC1:SSF1:OSH3:STE12:IPI1:NAM8:CDC12:KEL1:NMD3:RIX1:SCH9:IRR1:AXL2:SQT1:YVH1:EXO70:TIF2:SET2:SUI2:CDC11:BUD4:HMS2:LAC1:MAK11:KTI12:RAD27:SNU114:PXL1:HIF1:RAX2:RSA3:GCD7:NUP2:PRP39:RS…	7568:6400:45026:6402:7131:9749:6406:6260:6333:6407:6334:6408:7064:6409:6338:7068:6267:6268:1324:6913:722:6915:723:5977:6412:6413:6342:6270:226:42493:6348:1402:1403:731:735:45041:45047:7155:6281:6354:162:6355:6357:742:42148:747:749:6797:7232:9847:6360:6508:7165:245:6364:7094:6365:6366:7096:6367:6368:6298:9272:755:6513:46513:6446:183:184:6376:30433:30437:902:6887:6888:335:7329:910:6020:46020:6892:6…
65003	macromolecular complex assembly	55 out of 652 genes, 8.4%	310 out of 7288 background genes, 4.3%	0.00043	NUP60:MCM2:CDC47:RRP7:PAT1:USO1:TAF10:RPL12A:AFG3:GAL83:PAB1:BRR2:DBP3:TAF6:SPT6:NSR1:MRPL9:SSF1:IPI1:NAM8:NMD3:RIX1:SQT1:TIF2:SUI2:MAK11:SNU114:HIF1:RSA3:GCD7:PRP39:RSE1:CAC2:SEC65:NUP53:NIP1:DBP6:BRX1:REX4:CDC33:RRP40:NOP8:NOB1:RPL3:NOC2:GCD1:VPH1:PRT1:RPL5:SRP72:NIP7:SRP68:HAA1:CDC54:RPL11A	6402:6406:6407:6334:6408:6409:6267:6268:6913:723:6412:6413:6342:6270:6348:1403:45041:45047:7155:6281:6355:747:6797:6508:7165:245:6364:6365:6367:6368:6446:184:6376:6888:6607:6461:6608:6609:6465:6468:27:349:28:42254:42255:6610:6611:6617:6473:290:42273:42274:6999:54:55:59:30489:30490:16568:74:395:396:398:43248:16573:43254:7035:114:6325:7059:8361
15931	nucleobase, nucleoside, nucleotide and nucleic acid transport	24 out of 652 genes, 3.7%	88 out of 7288 background genes, 1.2%	0.00044	HMT1:GBP2:NUP157:GLE2:NIC96:NUP145:ARC1:APQ12:NUP159:NUP82:NUP85:NUP100:LOS1:NUP133:NUP2:NDC1:NUP188:NUP53:RNA1:PSE1:HRB1:NUP1:MTR10:ANT1	6403:6404:6405:6406:6407:6408:6409:723:6342:6418:6348:6388:6606:6607:6608:6609:42254:6610:6611:16973:50000:6998:6999:6635:54:59:7020:16072:7103:7031:18195:15867:6259
6403	RNA localization	24 out of 652 genes, 3.7%	88 out of 7288 background genes, 1.2%	0.00044	HMT1:GBP2:NUP157:GLE2:LOC1:NIC96:NUP145:ARC1:APQ12:NUP159:NUP82:NUP85:NUP100:LOS1:NUP133:NUP2:NDC1:NUP188:NUP53:RNA1:PSE1:HRB1:NUP1:MTR10	8298:6403:6404:6405:6406:6407:6408:6409:723:6342:6418:6348:6388:6606:6607:6608:6609:42254:6610:6611:16973:42273:50000:6998:6999:54:59:7020:16072:7103:18195:6259
46040	IMP metabolic process	9 out of 652 genes, 1.4%	14 out of 7288 background genes, 0.2%	0.00047	ADE1:PRS4:ADE8:PRS2:ADE5,7:PRS3:ADE4:PRS5:ADE2	723:42493:162:42254:6207:6144:105:46084:6164:6166:6189:8361
6188	IMP biosynthetic process	9 out of 652 genes, 1.4%	14 out of 7288 background genes, 0.2%	0.00047	ADE1:PRS4:ADE8:PRS2:ADE5,7:PRS3:ADE4:PRS5:ADE2	723:42493:162:42254:6207:6144:105:46084:6164:6166:6189:8361
6189	'de novo' IMP biosynthetic process	9 out of 652 genes, 1.4%	14 out of 7288 background genes, 0.2%	0.00047	ADE1:PRS4:ADE8:PRS2:ADE5,7:PRS3:ADE4:PRS5:ADE2	723:42493:162:42254:6207:6144:105:46084:6164:6166:6189:8361
6405	RNA export from nucleus	22 out of 652 genes, 3.4%	77 out of 7288 background genes, 1.1%	0.00055	HMT1:GBP2:NUP157:GLE2:NIC96:NUP145:ARC1:APQ12:NUP159:NUP82:NUP85:NUP100:LOS1:NUP133:NUP2:NDC1:NUP188:NUP53:RNA1:PSE1:HRB1:NUP1	6404:6405:6406:6407:6408:6409:723:6342:6418:6348:6388:6606:6607:6608:6609:42254:6610:6611:16973:50000:6998:6999:54:59:7020:16072:7103:18195:6259
8610	lipid biosynthetic process	29 out of 652 genes, 4.4%	121 out of 7288 background genes, 1.7%	0.00057	SCT1:RER2:TSC10:FEN1:PER1:SLC1:LCB2:SUR2:GPI11:GPI8:ERG4:MUQ1:CAX4:CHO2:LAG1:NSG1:LAS21:ELO1:GPI14:LAC1:ACP1:SUR4:HMG2:HMG1:ERG8:LCB1:CYB5:ERG10:FAS2	7568:8299:6696:723:16255:16192:6506:8610:19408:46513:6888:6892:30026:19368:8654:6118:18065:6486:6487:6633:31505:6646:16126:30497:6656:30148:6665:6666:1302
30488	tRNA methylation	9 out of 652 genes, 1.4%	15 out of 7288 background genes, 0.2%	0.00108	NCL1:TRM7:TRM8:TRM1:GCD14:TRM12:TRM9:TRM10:TRM11	6412:6950:42254:30488
43170	macromolecule metabolic process	307 out of 652 genes, 47.1%	2801 out of 7288 background genes, 38.4%	0.00151	PMT2:POP5:PTA1:NUP60:MCM2:NCL1:YBL055C:ILS1:MAP2:PKC1:RER2:MNN2:HMT1:TRM7:ALG14:RFC5:RXT2:GRS1:MRPL36:SUP45:CNS1:NPL4:CDC47:KTR3:ENP1:MRPL37:HSM3:RRP7:SRO9:PGK1:RRP43:PER1:PWP2:HCM1:PAT1:CDC39:SIR2:LHP1:USO1:TSR1:QRI1:RRP42:RPC53:FAP7:TRM8:MRPL11:NHP2:SSB1:PHO13:RRP8:RRP1:TRM1:RPA14:TAF10:RSM24:UBC1:RVB1:MSS116:UME6:MNN10:GPI11:MRPL35:GPI8:MRP1:UTP5:STE14:UTP6:RMT2:RBA50:EDC3:SPF1:ANP1:RAD23:GDA1…	715:6400:7131:6402:6404:9749:6260:6333:7062:6406:6334:6407:7064:6408:6409:7067:6265:6338:7068:6267:6268:6269:31055:1324:6913:722:723:724:5977:16255:6412:6413:6414:6342:6415:6270:6271:2:6418:6272:48017:42493:154:6348:1402:1403:8380:731:735:45041:46855:46856:30846:30847:45047:6350:7155:6353:6426:6427:6281:6354:6355:6357:6359:6289:42148:747:749:17148:6797:8033:6431:9847:6360:6506:6508:6436:7165:245:…
6400	tRNA modification	16 out of 652 genes, 2.5%	48 out of 7288 background genes, 0.7%	0.00211	NCL1:TRM7:TRM8:TRM1:IKI1:GCD14:KTI12:DUS4:TRM12:TRM9:DUS1:SMM1:RIB2:TRM10:TRM11:PUS1	6400:6412:6357:8033:6950:42254:16049:30488:9231:31119
6402	mRNA catabolic process	18 out of 652 genes, 2.8%	59 out of 7288 background genes, 0.8%	0.00211	RRP43:PAT1:CDC39:RRP42:EDC3:TPA1:LSM4:RRP46:SKI6:RRP4:NOT3:LSM1:MRT4:POP2:CDC33:RRP40:DCP1:SKI3	6402:723:6413:6357:749:6364:6365:6368:31087:6446:184:6451:42254:42255:288:289:290:42273:16567:74:398:43330:122:7124:7059
9058	biosynthetic process	153 out of 652 genes, 23.5%	1220 out of 7288 background genes, 16.7%	0.00233	PMT2:ADE1:SCT1:PRS4:ILS1:RER2:MNN2:TRM7:ALG14:GRS1:MRPL36:SUP45:KTR3:HIS7:ARO4:TSC10:MRPL37:ILV6:HIS4:SRO9:PGK1:FEN1:PER1:PAT1:SLC1:QRI1:MRPL11:SSB1:LCB2:ARO1:HOM2:RSM24:MNN10:SUR2:GPI11:MRPL35:GPI8:MRP1:TRP4:ADE8:RIB3:SPF1:ANP1:GDA1:RPL12A:PCM1:AFG3:PRO3:TPA1:HOM3:ILV1:TRP2:MET6:PRS2:COX15:PAB1:ECM32:ERG4:STT3:ALG2:MNP1:ARC1:RPL1B:RPL9A:CDC55:GCN1:ADE5,7:MUQ1:CAX4:MRP13:VAS1:CHO2:SER2:MRPL9:SMI1…	9098:7568:8299:6696:6402:6333:6409:723:16255:6412:6413:6414:6415:2:226:6418:42493:6784:45041:16192:6353:6426:6427:162:17148:6431:6506:6508:6436:6438:7094:8610:8612:6874:19408:46513:6446:46515:6448:184:6449:6888:19413:6450:6451:6526:910:19856:917:6892:6893:6461:6465:27:42254:6038:17183:30026:6541:6470:32:19368:288:8654:51083:6118:6045:18065:6048:6555:290:6486:6487:6488:6633:6561:6490:6491:52:6566:…
42398	amino acid derivative biosynthetic process	10 out of 652 genes, 1.5%	20 out of 7288 background genes, 0.3%	0.00252	PRS4:TRP4:TRP2:PRS2:MUQ1:PRS3:DYS1:LIA1:TRP3:PRS5	723:226:162:8612:46515:42254:6207:6646:105:6166:6189:8361
6997	nuclear organization and biogenesis	17 out of 652 genes, 2.6%	55 out of 7288 background genes, 0.8%	0.00332	YBL055C:NUP157:GLE2:NIC96:NUP145:OSH3:SNL1:NUP159:NUP82:NUP85:NUP100:NUP133:NUP2:NUP188:NUP53:YNL313C:NUP1	6405:6406:6407:6408:6409:6342:6348:1403:742:6887:6457:6388:6897:6606:6607:6608:6609:6979:6610:6611:30469:50000:6998:6999:54:59:15918:6309:7124:6259
162	tryptophan biosynthetic process	7 out of 652 genes, 1.1%	10 out of 7288 background genes, 0.1%	0.00427	PRS4:TRP4:TRP2:PRS2:PRS3:TRP3:PRS5	723:162:42254:6207:105:6166:6189:8361
42430	indole and derivative metabolic process	7 out of 652 genes, 1.1%	10 out of 7288 background genes, 0.1%	0.00427	PRS4:TRP4:TRP2:PRS2:PRS3:TRP3:PRS5	723:162:42254:6207:105:6166:6189:8361
42434	indole derivative metabolic process	7 out of 652 genes, 1.1%	10 out of 7288 background genes, 0.1%	0.00427	PRS4:TRP4:TRP2:PRS2:PRS3:TRP3:PRS5	723:162:42254:6207:105:6166:6189:8361
42435	indole derivative biosynthetic process	7 out of 652 genes, 1.1%	10 out of 7288 background genes, 0.1%	0.00427	PRS4:TRP4:TRP2:PRS2:PRS3:TRP3:PRS5	723:162:42254:6207:105:6166:6189:8361
46219	indolalkylamine biosynthetic process	7 out of 652 genes, 1.1%	10 out of 7288 background genes, 0.1%	0.00427	PRS4:TRP4:TRP2:PRS2:PRS3:TRP3:PRS5	723:162:42254:6207:105:6166:6189:8361
6568	tryptophan metabolic process	7 out of 652 genes, 1.1%	10 out of 7288 background genes, 0.1%	0.00427	PRS4:TRP4:TRP2:PRS2:PRS3:TRP3:PRS5	723:162:42254:6207:105:6166:6189:8361
6586	indolalkylamine metabolic process	7 out of 652 genes, 1.1%	10 out of 7288 background genes, 0.1%	0.00427	PRS4:TRP4:TRP2:PRS2:PRS3:TRP3:PRS5	723:162:42254:6207:105:6166:6189:8361
9096	aromatic amino acid family biosynthetic process, anthranilate pathway	7 out of 652 genes, 1.1%	10 out of 7288 background genes, 0.1%	0.00427	PRS4:TRP4:TRP2:PRS2:PRS3:TRP3:PRS5	723:162:42254:6207:105:6166:6189:8361
6163	purine nucleotide metabolic process	15 out of 652 genes, 2.3%	46 out of 7288 background genes, 0.6%	0.006	ADE1:PRS4:HIS7:HPT1:ADE8:GUK1:PRS2:ADE5,7:PRS3:IMD3:APT1:ADE4:ADE12:PRS5:ADE2	723:42493:162:42254:46037:6207:6144:9127:105:46084:46086:6164:6166:6167:6168:32263:32264:6183:6189:8361
51234	establishment of localization	125 out of 652 genes, 19.2%	969 out of 7288 background genes, 13.3%	0.00636	ERP2:ECM1:NUP60:APL3:RER2:KAP104:HMT1:TAT1:PHO88:TRS20:REI1:SSH1:GBP2:ADP1:FEN1:ERP3:USO1:GET3:COP1:SEC31:GCS1:SEC7:UBC1:SLY1:CCC2:BCP1:ATO3:NHX1:AGE1:CAN1:SIT1:AFG3:NUP157:GLE2:KAP123:SCS2:FTR1:OXA1:EMP47:NIC96:RET2:PMA1:KAP122:NUP145:LSG1:ARC1:TIP20:CHC1:CSE1:TOM20:HIP1:APL6:OSH3:GGA2:NMD3:CTR2:RIX1:TIM44:APQ12:NUP159:DJP1:NUP82:EXO70:PAM16:TIM17:SFH5:VPS35:LAA1:OPT1:NUP85:MIR1:NMD5:NUP100:OAC1…	6403:6404:6405:9749:6406:6407:6408:6409:6913:6842:723:6412:6342:2:6418:48017:42493:6348:43001:1403:15892:15893:19740:6857:45041:46856:16192:45045:45047:16197:9408:42144:742:6790:42147:6865:747:8104:45053:9847:6508:6365:10038:17157:6879:6513:19408:30433:30437:15992:902:32979:6882:30004:6885:6886:30007:6887:6888:11:6458:51204:6388:910:6020:6890:6891:6892:6893:6895:6896:6897:15718:6606:6607:6461:660…
6810	transport	123 out of 652 genes, 18.9%	950 out of 7288 background genes, 13.0%	0.00639	ERP2:ECM1:NUP60:APL3:RER2:KAP104:HMT1:TAT1:PHO88:TRS20:REI1:SSH1:GBP2:ADP1:FEN1:ERP3:USO1:GET3:COP1:SEC31:GCS1:SEC7:UBC1:SLY1:CCC2:BCP1:ATO3:NHX1:AGE1:CAN1:SIT1:AFG3:NUP157:GLE2:KAP123:SCS2:FTR1:EMP47:NIC96:RET2:PMA1:KAP122:NUP145:LSG1:ARC1:TIP20:CHC1:CSE1:TOM20:HIP1:APL6:OSH3:GGA2:NMD3:CTR2:RIX1:TIM44:APQ12:NUP159:DJP1:NUP82:EXO70:PAM16:TIM17:SFH5:VPS35:LAA1:OPT1:NUP85:MIR1:NMD5:NUP100:OAC1:APL2…	6403:6404:6405:9749:6406:6407:6408:6409:6913:6842:723:6412:6342:2:6418:48017:42493:6348:43001:1403:15892:15893:19740:6857:45041:46856:16192:45045:45047:16197:9408:42144:742:6790:42147:6865:747:8104:45053:9847:6508:6365:10038:17157:6879:6513:19408:30433:30437:15992:902:6882:30004:6885:6886:30007:6887:6888:11:6458:51204:6388:910:6020:6890:6891:6892:6893:6895:6896:6897:15718:6606:6607:6461:6608:6609…
51028	mRNA transport	18 out of 652 genes, 2.8%	64 out of 7288 background genes, 0.9%	0.00765	HMT1:GBP2:NUP157:GLE2:NIC96:NUP145:APQ12:NUP159:NUP82:NUP85:NUP100:NUP133:NUP2:NUP188:NUP53:PSE1:HRB1:NUP1	6405:6406:6407:6408:6409:723:6342:6348:6388:6606:6607:6608:6609:42254:6610:6611:16973:50000:6998:6999:54:59:18195:6259
6406	mRNA export from nucleus	18 out of 652 genes, 2.8%	64 out of 7288 background genes, 0.9%	0.00765	HMT1:GBP2:NUP157:GLE2:NIC96:NUP145:APQ12:NUP159:NUP82:NUP85:NUP100:NUP133:NUP2:NUP188:NUP53:PSE1:HRB1:NUP1	6405:6406:6407:6408:6409:723:6342:6348:6388:6606:6607:6608:6609:42254:6610:6611:16973:50000:6998:6999:54:59:18195:6259
Function
GOID	GO_term	Cluster frequency	Background frequency	P-value	Gene(s) annotated to the term	Directly Annotated GOID List
3824	catalytic activity	275 out of 652 genes, 42.2%	1988 out of 7288 background genes, 27.3%	2.55e-15	PMT2:POP5:GCV3:ADE1:SCT1:MCM2:NCL1:YBL055C:PRS4:ILS1:MAP2:PKC1:RER2:MNN2:YBR028C:HMT1:TRM7:ALG14:RFC5:RXT2:GRS1:TYR1:FZO1:CDC47:KTR3:HIS7:ARO4:DUT1:TSC10:ILV6:HIS4:APA1:ADP1:PGK1:FEN1:RRP43:CDC39:SIR2:SLC1:GET3:QRI1:RRP42:RPC53:FAP7:DLD2:TRM8:SSB1:YPD1:PHO13:YDR061W:LCB2:RRP8:ALT2:TRM1:ARO1:RPA14:HOM2:UBC1:RVB1:MSS116:UME6:MNN10:CCC2:SUR2:GPI11:GPI8:TRR1:TRP4:HPT1:ADE8:STE14:GUK1:RMT2:RIB3:SAM2:F…	8296:4084:210:4088:42626:4730:51377:4806:4735:4809:4591:4592:51015:8441:3938:3866:4596:3869:50072:42054:16251:4160:4306:4309:17057:4239:4169:150:31202:5545:4671:4672:158:3871:4674:9:16765:4748:4749:8451:45547:4679:4315:4316:4170:17136:4175:4176:4820:4821:4822:4750:309:4825:8897:4680:4681:16772:16846:5487:4758:4759:3887:4322:19829:4326:17076:16274:16279:4830:170:4832:8977:171:246:175:4764:4765:469…
16740	transferase activity	105 out of 652 genes, 16.1%	694 out of 7288 background genes, 9.5%	8.26e-06	PMT2:SCT1:NCL1:PRS4:PKC1:RER2:MNN2:YBR028C:HMT1:TRM7:ALG14:KTR3:HIS7:ARO4:ILV6:PGK1:FEN1:SLC1:QRI1:RPC53:TRM8:YPD1:LCB2:RRP8:ALT2:TRM1:ARO1:RPA14:MNN10:GPI11:TRP4:HPT1:ADE8:STE14:GUK1:RMT2:SAM2:ANP1:POL5:GAL83:HOM3:MET6:PRS2:YCK3:STT3:ALG2:RPB9:MUQ1:CHO2:MRPL9:BUD32:LAG1:PRS3:ARD1:THR1:DYS1:ARO9:SCH9:RPB3:HIS5:LAS21:TRL1:GCD14:URA2:RPA34:SET2:MNN11:MNN5:ELO1:GPI14:RPA12:BAT2:AUR1:LAC1:PRR1:SHM2:N…	4084:4088:51377:4809:51015:3866:4596:42054:4306:4169:4671:4672:3871:4674:9:16765:4749:45547:4679:4315:4316:309:8897:4680:4681:16772:5487:4758:3887:16274:16279:4764:4765:4693:4697:4400:3899:16423:9922:16428:16429:3972:3977:8483:16431:4413:45140:3984:3985:4422:26:3999:4366:46975:30:43495:4372:51730:4376:48:50291:3723:4385:8168:4608:3735:8173:8175:8176:8757:4618:4478:4113:4044:4048:107:4702:4631:551…
16462	pyrophosphatase activity	54 out of 652 genes, 8.3%	276 out of 7288 background genes, 3.8%	9.17e-06	MCM2:RFC5:FZO1:CDC47:DUT1:HIS4:APA1:ADP1:GET3:FAP7:SSB1:YDR061W:RVB1:MSS116:CCC2:SPF1:GDA1:NUG1:AFG3:RAD51:BRR2:RSC8:PMA1:RPT6:NPY1:DBP3:LSG1:PRP43:CAX4:RSR1:CDC12:DBP8:PPX1:STH1:HAM1:NPA3:VMA5:SNU114:VPS1:RSC4:SFH1:YPT7:STV1:ATM1:RIA1:RFC3:DBP6:YNR048W:MSH2:RFC4:DCP1:VPH1:CDC54:ARP7	210:42626:50072:16251:4309:150:31202:5545:4170:4175:19829:17076:5200:45134:8047:8553:400:403:404:406:46961:16887:4003:4004:32135:4871:32137:32138:51082:16462:15662:4012:47429:43141:3723:4382:3729:8237:8094:30623:4399:8186:3682:3689:4635:4636:5524:5525:8796:3924:17111
16817	hydrolase activity, acting on acid anhydrides	54 out of 652 genes, 8.3%	276 out of 7288 background genes, 3.8%	9.17e-06	MCM2:RFC5:FZO1:CDC47:DUT1:HIS4:APA1:ADP1:GET3:FAP7:SSB1:YDR061W:RVB1:MSS116:CCC2:SPF1:GDA1:NUG1:AFG3:RAD51:BRR2:RSC8:PMA1:RPT6:NPY1:DBP3:LSG1:PRP43:CAX4:RSR1:CDC12:DBP8:PPX1:STH1:HAM1:NPA3:VMA5:SNU114:VPS1:RSC4:SFH1:YPT7:STV1:ATM1:RIA1:RFC3:DBP6:YNR048W:MSH2:RFC4:DCP1:VPH1:CDC54:ARP7	210:42626:50072:16251:4309:150:31202:5545:4170:4175:19829:17076:5200:45134:8047:8553:400:403:404:406:46961:16887:4003:4004:32135:4871:32137:32138:51082:16462:15662:4012:47429:43141:3723:4382:3729:8237:8094:30623:4399:8186:3682:3689:4635:4636:5524:5525:8796:3924:17111
16818	hydrolase activity, acting on acid anhydrides, in phosphorus-containing anhydrides	54 out of 652 genes, 8.3%	276 out of 7288 background genes, 3.8%	9.17e-06	MCM2:RFC5:FZO1:CDC47:DUT1:HIS4:APA1:ADP1:GET3:FAP7:SSB1:YDR061W:RVB1:MSS116:CCC2:SPF1:GDA1:NUG1:AFG3:RAD51:BRR2:RSC8:PMA1:RPT6:NPY1:DBP3:LSG1:PRP43:CAX4:RSR1:CDC12:DBP8:PPX1:STH1:HAM1:NPA3:VMA5:SNU114:VPS1:RSC4:SFH1:YPT7:STV1:ATM1:RIA1:RFC3:DBP6:YNR048W:MSH2:RFC4:DCP1:VPH1:CDC54:ARP7	210:42626:50072:16251:4309:150:31202:5545:4170:4175:19829:17076:5200:45134:8047:8553:400:403:404:406:46961:16887:4003:4004:32135:4871:32137:32138:51082:16462:15662:4012:47429:43141:3723:4382:3729:8237:8094:30623:4399:8186:3682:3689:4635:4636:5524:5525:8796:3924:17111
30515	snoRNA binding	14 out of 652 genes, 2.1%	28 out of 7288 background genes, 0.4%	1.1e-05	ENP1:PWP2:UTP5:UTP6:SLX9:UTP8:SBP1:UTP9:UTP10:UTP13:UTP14:UTP15:NAN1:RRP9	30515
16741	transferase activity, transferring one-carbon groups	22 out of 652 genes, 3.4%	85 out of 7288 background genes, 1.2%	0.00166	NCL1:HMT1:TRM7:TRM8:RRP8:TRM1:ADE8:STE14:RMT2:MET6:CHO2:GCD14:URA2:SET2:SHM2:TRM12:TRM9:NOP2:TRM10:TRM11:ABP140:RKM1	4088:4809:51015:42054:4671:3871:16274:16279:16423:16428:16429:16431:46975:4372:3723:8168:4608:8173:8175:8176:8757:5515:4644:4070:30674
17111	nucleoside-triphosphatase activity	45 out of 652 genes, 6.9%	255 out of 7288 background genes, 3.5%	0.00284	MCM2:RFC5:FZO1:CDC47:ADP1:GET3:FAP7:SSB1:YDR061W:RVB1:MSS116:CCC2:SPF1:NUG1:AFG3:RAD51:BRR2:RSC8:PMA1:RPT6:DBP3:LSG1:PRP43:RSR1:CDC12:DBP8:STH1:NPA3:VMA5:SNU114:VPS1:RSC4:SFH1:YPT7:STV1:ATM1:RIA1:RFC3:DBP6:YNR048W:MSH2:RFC4:VPH1:CDC54:ARP7	42626:16251:150:31202:5545:4175:19829:17076:5200:8553:400:403:404:406:46961:16887:4003:4004:32135:4871:32137:32138:51082:15662:4012:43141:3723:8237:8094:30623:8186:3682:3689:5524:5525:3924:17111
175	3'-5'-exoribonuclease activity	9 out of 652 genes, 1.4%	18 out of 7288 background genes, 0.2%	0.00394	RRP43:CDC39:RRP42:RRP46:SKI6:RRP4:NOT3:POP2:RRP40	175:4842:3723
42623	ATPase activity, coupled	29 out of 652 genes, 4.4%	137 out of 7288 background genes, 1.9%	0.00402	MCM2:RFC5:CDC47:ADP1:YDR061W:RVB1:MSS116:CCC2:SPF1:RAD51:BRR2:RSC8:PMA1:DBP3:PRP43:DBP8:STH1:VMA5:RSC4:SFH1:STV1:ATM1:RFC3:DBP6:YNR048W:RFC4:VPH1:CDC54:ARP7	42626:16251:150:31202:19829:17076:8553:46961:16887:4003:4004:15662:4012:43141:3723:8094:8186:3682:3689:5524
8168	methyltransferase activity	21 out of 652 genes, 3.2%	83 out of 7288 background genes, 1.1%	0.00409	NCL1:HMT1:TRM7:TRM8:RRP8:TRM1:ADE8:STE14:RMT2:MET6:CHO2:GCD14:SET2:SHM2:TRM12:TRM9:NOP2:TRM10:TRM11:ABP140:RKM1	4809:51015:42054:4671:3871:16274:16279:16423:16428:16429:16431:46975:4372:3723:8168:4608:8173:8175:8176:8757:5515:4644:30674
Component
GOID	GO_term	Cluster frequency	Background frequency	P-value	Gene(s) annotated to the term	Directly Annotated GOID List
44464	cell part	648 out of 652 genes, 99.4%	5495 out of 7288 background genes, 75.4%	2.15e-74	ERP2:PMT2:POP5:RBG1:PTA1:GCV3:ECM1:NUP60:ADE1:SCT1:MCM2:NCL1:APL3:YBL055C:PRS4:ILS1:MAP2:YBL104C:PKC1:RER2:MNN2:KAP104:YBR028C:HMT1:TRM7:TAT1:ALG14:IST2:RFC5:RXT2:PHO88:GRS1:MRPL36:SUP45:CNS1:TOS1:TYR1:NPL4:SMY2:FZO1:MBA1:CDC47:KTR3:ENP1:HIS7:ARO4:DUT1:TRS20:TSC10:REI1:MRPL37:HSM3:SSH1:ILV6:GBP2:HIS4:RRP7:SRO9:APA1:ADP1:PGK1:CWH43:FEN1:RRP43:PER1:YCR051W:CTR86:PWP2:HCM1:PAT1:CDC39:MCD1:ERP3:SIR2:…	5677:5960:5678:932:790:30684:46695:30686:30687:794:795:142:30688:42555:144:145:798:502:5823:508:31415:5681:5682:5829:31417:5685:5758:5686:5759:5688:5971:30904:30478:30690:30691:17059:220:221:1400:228:31207:5619:5830:159:1405:5761:5835:5762:5763:31428:5768:32806:8023:30121:30122:30123:5621:30125:5622:19898:30126:42645:30127:5624:18444:5625:5628:5840:5842:5770:5843:5844:5845:5773:812:5774:5847:5849…
5622	intracellular	623 out of 652 genes, 95.6%	5087 out of 7288 background genes, 69.8%	2.27e-64	ERP2:PMT2:POP5:RBG1:PTA1:GCV3:ECM1:NUP60:ADE1:SCT1:MCM2:NCL1:APL3:YBL055C:PRS4:ILS1:MAP2:YBL104C:PKC1:RER2:MNN2:KAP104:YBR028C:HMT1:TRM7:ALG14:RFC5:RXT2:PHO88:GRS1:MRPL36:SUP45:CNS1:TOS1:TYR1:NPL4:SMY2:FZO1:MBA1:CDC47:ENP1:HIS7:ARO4:DUT1:TRS20:TSC10:REI1:MRPL37:HSM3:SSH1:ILV6:GBP2:HIS4:RRP7:SRO9:APA1:ADP1:PGK1:FEN1:RRP43:PER1:YCR051W:CTR86:PWP2:HCM1:PAT1:CDC39:MCD1:SIR2:LHP1:SLC1:TSR1:GET3:QRI1:R…	5677:5960:5678:932:790:30684:46695:30686:30687:794:795:142:30688:42555:144:145:798:502:5823:508:31415:5681:5682:5829:31417:5685:5758:5686:5759:5688:5971:30904:30478:30690:30691:17059:220:221:1400:228:31207:5619:5830:159:1405:5761:5835:5762:5763:31428:5768:32806:8023:30121:30122:30123:5621:30125:5622:19898:30126:42645:30127:5624:5625:18444:5628:5840:5842:5770:5843:5844:5845:5773:812:5774:5847:5849…
44424	intracellular part	619 out of 652 genes, 94.9%	5052 out of 7288 background genes, 69.3%	3.46e-62	ERP2:PMT2:POP5:RBG1:PTA1:GCV3:ECM1:NUP60:ADE1:SCT1:MCM2:NCL1:APL3:YBL055C:PRS4:ILS1:MAP2:YBL104C:PKC1:RER2:MNN2:KAP104:YBR028C:HMT1:TRM7:ALG14:RFC5:RXT2:PHO88:GRS1:MRPL36:SUP45:CNS1:TOS1:TYR1:NPL4:SMY2:FZO1:MBA1:CDC47:ENP1:ARO4:DUT1:TRS20:TSC10:REI1:MRPL37:HSM3:SSH1:ILV6:GBP2:RRP7:SRO9:APA1:ADP1:PGK1:FEN1:RRP43:PER1:YCR051W:CTR86:PWP2:HCM1:PAT1:CDC39:MCD1:SIR2:LHP1:SLC1:TSR1:GET3:QRI1:RRP42:YDL14…	5677:5960:5678:932:790:30684:46695:30686:30687:794:795:142:30688:42555:144:145:798:502:5823:508:31415:5681:5682:5829:31417:5685:5758:5686:5759:5688:5971:30904:30478:30690:30691:17059:220:221:1400:228:31207:5619:5830:159:1405:5761:5835:5762:5763:31428:5768:32806:8023:30121:30122:30123:5621:30125:5622:19898:30126:42645:30127:5624:5625:18444:5628:5840:5842:5770:5843:5844:5845:5773:812:5774:5847:5849…
43229	intracellular organelle	501 out of 652 genes, 76.8%	4021 out of 7288 background genes, 55.2%	8.83e-31	ERP2:PMT2:POP5:PTA1:GCV3:ECM1:NUP60:ADE1:SCT1:MCM2:NCL1:APL3:PKC1:RER2:MNN2:HMT1:ALG14:RFC5:RXT2:PHO88:GRS1:MRPL36:TOS1:NPL4:FZO1:MBA1:CDC47:ENP1:ARO4:DUT1:TRS20:TSC10:REI1:MRPL37:SSH1:ILV6:GBP2:RRP7:APA1:ADP1:PGK1:FEN1:RRP43:PER1:YCR051W:PWP2:HCM1:PAT1:CDC39:MCD1:SIR2:LHP1:TSR1:GET3:QRI1:RRP42:YDL144C:COP1:RPC53:FAP7:DLD2:SEC31:TRM8:MRPL11:ACK1:NHP2:SHS1:GCS1:PHO13:MRH1:YDR061W:LCB2:RRP8:RRP1:AR…	5677:5960:5678:932:790:30684:46695:30686:30687:794:795:142:30688:42555:144:798:502:5823:508:31415:5681:5682:5829:5685:5758:5686:5759:5688:30904:30478:30690:30691:17059:220:221:1400:228:31207:5619:5830:159:1405:5761:5835:5762:5763:31428:5768:32806:8023:30121:30122:5621:30125:5622:19898:30126:42645:30127:5624:5628:5840:5842:5770:5843:5773:812:5774:5847:5849:5777:5779:818:45121:31942:31588:30134:435…
43226	organelle	501 out of 652 genes, 76.8%	4022 out of 7288 background genes, 55.2%	9.62e-31	ERP2:PMT2:POP5:PTA1:GCV3:ECM1:NUP60:ADE1:SCT1:MCM2:NCL1:APL3:PKC1:RER2:MNN2:HMT1:ALG14:RFC5:RXT2:PHO88:GRS1:MRPL36:TOS1:NPL4:FZO1:MBA1:CDC47:ENP1:ARO4:DUT1:TRS20:TSC10:REI1:MRPL37:SSH1:ILV6:GBP2:RRP7:APA1:ADP1:PGK1:FEN1:RRP43:PER1:YCR051W:PWP2:HCM1:PAT1:CDC39:MCD1:SIR2:LHP1:TSR1:GET3:QRI1:RRP42:YDL144C:COP1:RPC53:FAP7:DLD2:SEC31:TRM8:MRPL11:ACK1:NHP2:SHS1:GCS1:PHO13:MRH1:YDR061W:LCB2:RRP8:RRP1:AR…	5677:5960:5678:932:790:30684:46695:30686:30687:794:795:142:30688:42555:144:798:502:5823:508:31415:5681:5682:5829:5685:5758:5686:5759:5688:30904:30478:30690:30691:17059:220:221:1400:228:31207:5619:5830:159:1405:5761:5835:5762:5763:31428:5768:32806:8023:30121:30122:5621:30125:5622:19898:30126:42645:30127:5624:5628:5840:5842:5770:5843:5773:812:5774:5847:5849:5777:5779:818:45121:31942:31588:30134:435…
43227	membrane-bound organelle	467 out of 652 genes, 71.6%	3674 out of 7288 background genes, 50.4%	2.84e-28	ERP2:PMT2:POP5:PTA1:GCV3:ECM1:NUP60:ADE1:SCT1:MCM2:NCL1:APL3:PKC1:RER2:MNN2:HMT1:ALG14:RXT2:PHO88:GRS1:MRPL36:TOS1:NPL4:FZO1:MBA1:CDC47:ENP1:ARO4:DUT1:TRS20:TSC10:MRPL37:SSH1:ILV6:GBP2:RRP7:APA1:ADP1:PGK1:FEN1:RRP43:PER1:YCR051W:PWP2:HCM1:CDC39:MCD1:SIR2:LHP1:TSR1:GET3:QRI1:RRP42:YDL144C:COP1:RPC53:FAP7:DLD2:SEC31:TRM8:MRPL11:ACK1:NHP2:GCS1:PHO13:MRH1:YDR061W:LCB2:RRP8:RRP1:ARX1:ALT2:TRM1:RPA14:H…	5677:5960:5678:790:30684:46695:30686:30687:794:795:30688:42555:798:502:508:5681:5682:5829:5685:5758:5686:5759:5688:30904:30690:30691:17059:220:221:228:31207:5619:5830:159:1405:5761:5835:5762:5763:31428:5768:32806:8023:30121:30122:5621:30125:5622:19898:30126:42645:30127:5624:5840:5842:5770:5773:812:5774:5847:5849:5777:5779:818:45121:31942:31588:30134:43529:243:30136:8250:30137:5634:5635:172:5637:1…
43231	intracellular membrane-bound organelle	467 out of 652 genes, 71.6%	3674 out of 7288 background genes, 50.4%	2.84e-28	ERP2:PMT2:POP5:PTA1:GCV3:ECM1:NUP60:ADE1:SCT1:MCM2:NCL1:APL3:PKC1:RER2:MNN2:HMT1:ALG14:RXT2:PHO88:GRS1:MRPL36:TOS1:NPL4:FZO1:MBA1:CDC47:ENP1:ARO4:DUT1:TRS20:TSC10:MRPL37:SSH1:ILV6:GBP2:RRP7:APA1:ADP1:PGK1:FEN1:RRP43:PER1:YCR051W:PWP2:HCM1:CDC39:MCD1:SIR2:LHP1:TSR1:GET3:QRI1:RRP42:YDL144C:COP1:RPC53:FAP7:DLD2:SEC31:TRM8:MRPL11:ACK1:NHP2:GCS1:PHO13:MRH1:YDR061W:LCB2:RRP8:RRP1:ARX1:ALT2:TRM1:RPA14:H…	5677:5960:5678:790:30684:46695:30686:30687:794:795:30688:42555:798:502:508:5681:5682:5829:5685:5758:5686:5759:5688:30904:30690:30691:17059:220:221:228:31207:5619:5830:159:1405:5761:5835:5762:5763:31428:5768:32806:8023:30121:30122:5621:30125:5622:19898:30126:42645:30127:5624:5840:5842:5770:5773:812:5774:5847:5849:5777:5779:818:45121:31942:31588:30134:43529:243:30136:8250:30137:5634:5635:172:5637:1…
5737	cytoplasm	466 out of 652 genes, 71.5%	3694 out of 7288 background genes, 50.7%	4e-27	ERP2:PMT2:RBG1:GCV3:ADE1:SCT1:MCM2:APL3:YBL055C:PRS4:ILS1:MAP2:YBL104C:PKC1:RER2:MNN2:KAP104:YBR028C:TRM7:ALG14:PHO88:GRS1:MRPL36:SUP45:CNS1:TOS1:TYR1:NPL4:SMY2:FZO1:MBA1:CDC47:ENP1:ARO4:DUT1:TRS20:TSC10:REI1:MRPL37:HSM3:SSH1:ILV6:APA1:ADP1:PGK1:FEN1:RRP43:PER1:YCR051W:CTR86:PWP2:PAT1:CDC39:SLC1:TSR1:GET3:QRI1:RRP42:YDL144C:COP1:FAP7:NRP1:DLD2:SEC31:MRPL11:ACK1:SHS1:GCS1:YPD1:PHO13:MRH1:YDR061W:L…	5960:932:790:30684:30686:30687:795:142:30688:42555:144:145:502:5823:31415:5681:5829:31417:5758:5759:5971:30904:30478:30690:30691:17059:220:221:1400:31207:5619:5830:1405:5761:5835:5762:5763:5768:8023:30121:30122:30123:5621:30125:5622:19898:30126:42645:30127:5624:5625:18444:5628:5840:5842:5770:5843:5845:5773:5774:5849:5777:5779:45121:16272:31942:31588:30134:43529:30136:8250:30137:5634:5635:5637:176…
5634	nucleus	271 out of 652 genes, 41.6%	1994 out of 7288 background genes, 27.4%	5.77e-14	POP5:PTA1:ECM1:NUP60:ADE1:MCM2:NCL1:PKC1:HMT1:RXT2:CDC47:ENP1:ARO4:DUT1:GBP2:RRP7:APA1:RRP43:YCR051W:PWP2:HCM1:CDC39:MCD1:SIR2:LHP1:TSR1:QRI1:RRP42:YDL144C:RPC53:FAP7:TRM8:NHP2:PHO13:RRP8:RRP1:ARX1:ALT2:TRM1:RPA14:HOM2:YDR161W:TAF10:RVB1:MSC2:UME6:SET7:TRP4:BCP1:UTP5:HPT1:ADE8:UTP6:GUK1:RMT2:RAD23:UTR4:POL5:PCM1:NUG1:SPC25:SRB4:GAL83:TPA1:IES5:RAD51:NUP157:GLE2:KAP123:LSM4:YCK3:NSA2:YER156C:PAB1:…	5677:5678:790:30684:46695:30686:30687:794:795:30688:42555:798:502:508:5681:5682:5829:5685:5686:5759:5688:30690:30691:228:159:31428:32806:8023:5840:5842:812:5847:5849:818:31588:243:5634:5635:172:5637:176:177:8540:30427:5783:5856:5789:16281:31011:108:30869:5641:5643:329:5934:8623:5935:5938:111:16363:119:32040:5724:408:16585:16586:5654:5655:5656:5876:16514:30014:775:30015:123:776:124:778:5730:5732:1…
44422	organelle part	297 out of 652 genes, 45.6%	2270 out of 7288 background genes, 31.1%	1.6e-13	ERP2:POP5:PTA1:ECM1:NUP60:MCM2:APL3:ALG14:RFC5:RXT2:MRPL36:FZO1:MBA1:CDC47:ENP1:TRS20:TSC10:REI1:MRPL37:SSH1:ILV6:RRP7:FEN1:RRP43:PER1:PWP2:PAT1:CDC39:MCD1:SIR2:LHP1:TSR1:GET3:RRP42:COP1:RPC53:DLD2:SEC31:MRPL11:NHP2:SHS1:GCS1:LCB2:RRP8:RRP1:ARX1:TRM1:RPA14:TAF10:SEC7:RSM24:SLY1:RVB1:MSS116:UME6:RTN1:MNN10:CCC2:GPI11:MRPL35:GPI8:MRP1:YDR352W:UTP5:STE14:UTP6:RIB3:FPR2:SPF1:ANP1:RAD23:UTR2:RPL12A:PO…	5677:5678:932:790:46695:30686:30687:794:795:142:30688:42555:144:798:502:5823:508:5681:5682:5829:5685:5758:5686:5759:5688:30478:30690:30691:17059:220:221:1400:228:31207:5619:1405:5761:5762:5763:31428:5768:32806:8023:30121:30122:30125:19898:30126:42645:30127:5624:5628:5840:5842:5770:5843:5773:812:5774:5847:5849:5777:5779:818:31942:31588:30134:43529:30136:243:8250:30137:5634:5635:172:5637:176:177:58…
44446	intracellular organelle part	297 out of 652 genes, 45.6%	2270 out of 7288 background genes, 31.1%	1.6e-13	ERP2:POP5:PTA1:ECM1:NUP60:MCM2:APL3:ALG14:RFC5:RXT2:MRPL36:FZO1:MBA1:CDC47:ENP1:TRS20:TSC10:REI1:MRPL37:SSH1:ILV6:RRP7:FEN1:RRP43:PER1:PWP2:PAT1:CDC39:MCD1:SIR2:LHP1:TSR1:GET3:RRP42:COP1:RPC53:DLD2:SEC31:MRPL11:NHP2:SHS1:GCS1:LCB2:RRP8:RRP1:ARX1:TRM1:RPA14:TAF10:SEC7:RSM24:SLY1:RVB1:MSS116:UME6:RTN1:MNN10:CCC2:GPI11:MRPL35:GPI8:MRP1:YDR352W:UTP5:STE14:UTP6:RIB3:FPR2:SPF1:ANP1:RAD23:UTR2:RPL12A:PO…	5677:5678:932:790:46695:30686:30687:794:795:142:30688:42555:144:798:502:5823:508:5681:5682:5829:5685:5758:5686:5759:5688:30478:30690:30691:17059:220:221:1400:228:31207:5619:1405:5761:5762:5763:31428:5768:32806:8023:30121:30122:30125:19898:30126:42645:30127:5624:5628:5840:5842:5770:5843:5773:812:5774:5847:5849:5777:5779:818:31942:31588:30134:43529:30136:243:8250:30137:5634:5635:172:5637:176:177:58…
32991	macromolecular complex	227 out of 652 genes, 34.8%	1626 out of 7288 background genes, 22.3%	4.69e-12	POP5:PTA1:GCV3:NUP60:MCM2:APL3:ALG14:RFC5:RXT2:MRPL36:SUP45:CDC47:ENP1:TRS20:REI1:MRPL37:SSH1:ILV6:SRO9:RRP43:PWP2:PAT1:CDC39:MCD1:SIR2:GET3:RRP42:RPC53:MRPL11:NHP2:SSB1:LCB2:ARX1:RPA14:TAF10:RSM24:UBC1:RVB1:UME6:YDR239C:MNN10:MRPL35:GPI8:MRP1:UTP5:UTP6:EDC3:ANP1:RAD23:RPL12A:AFG3:SPC25:SRB4:GAL83:RNR1:TRP2:NUP157:GLE2:KAP123:LSM4:NSA2:PAB1:BRR2:ECM32:NIC96:CDC14:RSC8:KAP122:STT3:RPT6:MNP1:RPB9:N…	5677:5960:5678:932:790:30684:46695:30686:30687:30688:42555:145:798:502:508:31415:5681:5682:5829:31417:5685:5686:5759:5688:5971:30904:30690:30691:17059:220:221:31207:5830:159:1405:5761:5835:5762:5763:31428:5768:32806:8023:30121:30122:30123:42645:5624:5625:18444:5840:5842:5770:5843:5844:5845:812:5847:5849:818:16272:31942:31588:43529:30136:243:8250:5634:172:176:5850:177:5851:8540:8541:5852:5783:5784…
31974	membrane-enclosed lumen	137 out of 652 genes, 21.0%	818 out of 7288 background genes, 11.2%	7.74e-12	POP5:PTA1:ECM1:MCM2:RXT2:MRPL36:CDC47:ENP1:MRPL37:ILV6:RRP7:PWP2:CDC39:SIR2:LHP1:TSR1:RPC53:DLD2:MRPL11:NHP2:RRP8:RRP1:ARX1:RPA14:TAF10:RSM24:RVB1:MSS116:UME6:MRPL35:MRP1:UTP5:UTP6:RIB3:POL5:NUG1:SRB4:GAL83:LSM4:NSA2:CDC14:RSC8:MNP1:RPB9:DBP3:NSA1:TAF6:ITC1:SLX9:MRP13:NOP7:SPT6:UTP8:NSR1:MRPL9:YHB1:YGR251W:MRP4:SBP1:RPP1:SSF1:IPI1:DBP8:IKI1:UTP9:RIX1:PPX1:RPB3:TIM44:NOT3:YIL091C:RSM25:KGD1:STH1:M…	5677:5678:790:46695:30686:30687:30688:42555:508:5829:5758:5759:5688:30690:30691:1405:5761:5762:5763:31428:8023:42645:5842:812:5847:5849:31588:5634:5635:172:5637:9277:5788:5789:31011:30869:5641:8623:9353:16363:119:32040:5724:16585:16586:5654:5655:5656:5948:16514:30014:775:30015:123:124:5730:5732:16592:16593:5736:5737:5665:5666:5739:5669:5886:783:5743:5816:46540:30532
43233	organelle lumen	137 out of 652 genes, 21.0%	818 out of 7288 background genes, 11.2%	7.74e-12	POP5:PTA1:ECM1:MCM2:RXT2:MRPL36:CDC47:ENP1:MRPL37:ILV6:RRP7:PWP2:CDC39:SIR2:LHP1:TSR1:RPC53:DLD2:MRPL11:NHP2:RRP8:RRP1:ARX1:RPA14:TAF10:RSM24:RVB1:MSS116:UME6:MRPL35:MRP1:UTP5:UTP6:RIB3:POL5:NUG1:SRB4:GAL83:LSM4:NSA2:CDC14:RSC8:MNP1:RPB9:DBP3:NSA1:TAF6:ITC1:SLX9:MRP13:NOP7:SPT6:UTP8:NSR1:MRPL9:YHB1:YGR251W:MRP4:SBP1:RPP1:SSF1:IPI1:DBP8:IKI1:UTP9:RIX1:PPX1:RPB3:TIM44:NOT3:YIL091C:RSM25:KGD1:STH1:M…	5677:5678:790:46695:30686:30687:30688:42555:508:5829:5758:5759:5688:30690:30691:1405:5761:5762:5763:31428:8023:42645:5842:812:5847:5849:31588:5634:5635:172:5637:9277:5788:5789:31011:30869:5641:8623:9353:16363:119:32040:5724:16585:16586:5654:5655:5656:5948:16514:30014:775:30015:123:124:5730:5732:16592:16593:5736:5737:5665:5666:5739:5669:5886:783:5743:5816:46540:30532
5730	nucleolus	66 out of 652 genes, 10.1%	303 out of 7288 background genes, 4.2%	1.14e-09	POP5:ECM1:ENP1:RRP7:PWP2:SIR2:LHP1:TSR1:NHP2:RRP8:RRP1:RPA14:UTP5:UTP6:POL5:NUG1:LSM4:NSA2:CDC14:DBP3:NSA1:SLX9:NOP7:UTP8:NSR1:YGR251W:SBP1:RPP1:SSF1:DBP8:UTP9:YIL091C:NOP9:UTP10:RPA34:RPA12:MRT4:UTP30:NOC3:SIK1:RSA3:UTP13:UTP14:UTP15:NOP2:RPC19:NOP13:KRI1:DBP6:NOP12:BRX1:REX4:NOP8:UTP23:NOC2:NOP58:RPA43:RPA190:NOP4:NOG1:NAN1:NOP53:NIP7:RRP9:RRP15:JIP5	5677:30686:30687:30688:5688:30690:30691:31428:5842:5634:172:30869:32040:5724:5654:5655:5730:5732:5736:5737:5666:5739:783:5816:46540:30532
31981	nuclear lumen	103 out of 652 genes, 15.8%	602 out of 7288 background genes, 8.3%	7.16e-09	POP5:PTA1:ECM1:MCM2:RXT2:CDC47:ENP1:RRP7:PWP2:CDC39:SIR2:LHP1:TSR1:RPC53:NHP2:RRP8:RRP1:ARX1:RPA14:TAF10:RVB1:UME6:UTP5:UTP6:POL5:NUG1:SRB4:LSM4:NSA2:CDC14:RSC8:RPB9:DBP3:NSA1:TAF6:ITC1:SLX9:NOP7:SPT6:UTP8:NSR1:YGR251W:SBP1:RPP1:SSF1:IPI1:DBP8:IKI1:UTP9:RIX1:RPB3:NOT3:YIL091C:STH1:MET18:NOP9:TRL1:UTP10:RPA34:RPA12:MRT4:LOS1:RSC4:UTP30:HIF1:NOC3:SIK1:RSA3:UTP13:SFH1:CDC73:UTP14:CAC2:RNA14:UTP15:NO…	5677:5678:790:46695:30686:30687:30688:42555:508:5688:30690:30691:31428:8023:5842:812:5847:5849:5634:172:5637:31011:30869:8623:16363:119:32040:5724:16585:16586:5654:5655:5656:16514:30014:775:30015:123:124:5730:5732:16592:16593:5736:5737:5665:5739:5666:5669:783:5816:46540:30532
44428	nuclear part	159 out of 652 genes, 24.4%	1105 out of 7288 background genes, 15.2%	2.36e-08	POP5:PTA1:ECM1:NUP60:MCM2:RXT2:CDC47:ENP1:RRP7:RRP43:PWP2:CDC39:MCD1:SIR2:LHP1:TSR1:RRP42:RPC53:NHP2:RRP8:RRP1:ARX1:TRM1:RPA14:TAF10:RVB1:UME6:UTP5:UTP6:RAD23:POL5:NUG1:SPC25:SRB4:GAL83:RAD51:NUP157:GLE2:KAP123:LSM4:NSA2:BRR2:NIC96:CDC14:RSC8:KAP122:RPB9:DBP3:NUP145:NSA1:TAF6:PRP43:ITC1:CSE1:SLX9:RRP46:NOP7:SPT6:UTP8:NSR1:SKI6:YGR251W:SBP1:RPP1:SSF1:RRP4:IPI1:NAM8:DBP8:IKI1:UTP9:RIX1:SNL1:RPB3:IR…	5677:5678:790:46695:30686:30687:794:795:30688:42555:798:502:508:5681:5682:5685:5686:5759:5688:30690:30691:228:31428:32806:8023:5842:812:5847:5849:818:31588:243:5634:5635:172:5637:176:177:5783:5789:31011:108:30869:5641:5643:8623:5938:111:16363:119:32040:5724:16585:16586:5654:5655:5656:5876:16514:30014:775:30015:123:776:124:778:5730:5732:16592:16593:5662:5736:5737:5665:5739:5666:5669:922:780:781:78…
43228	non-membrane-bound organelle	150 out of 652 genes, 23.0%	1025 out of 7288 background genes, 14.1%	2.76e-08	POP5:ECM1:MCM2:PKC1:RFC5:MRPL36:CDC47:ENP1:REI1:MRPL37:RRP7:PWP2:PAT1:MCD1:SIR2:LHP1:TSR1:MRPL11:NHP2:SHS1:GCS1:RRP8:RRP1:ARX1:RPA14:RSM24:YDR239C:MRPL35:MRP1:UTP5:UTP6:UTR2:RPL12A:POL5:NUG1:SPC25:RAD51:LSM4:NSA2:PAB1:CDC14:MNP1:DBP3:NSA1:RPL1B:RPL9A:GCN1:SLX9:MRP13:NOP7:UTP8:NSR1:MRPL9:YGR251W:MRP4:OTU2:RPL8A:SBP1:ARD1:GIC1:RPP1:SSF1:CDC12:DBP8:NMD3:UTP9:IRR1:YIL091C:RSM25:AXL2:SQT1:NOP9:MRPL8:M…	5677:5678:932:790:30686:30687:794:795:142:30688:42555:144:798:5823:31415:5829:5688:30478:30690:30691:1400:228:5619:5830:5761:5762:5763:31428:5768:30121:5628:5840:5842:5843:818:30136:5634:172:5850:30427:5783:5856:9277:16281:30869:5643:5934:5935:5938:5793:43614:32040:5724:5654:5655:5656:5940:5876:43332:775:776:778:5802:5730:5732:5662:5736:5663:5737:5666:5739:922:5884:5887:780:781:783:131:788:5816:4…
43232	intracellular non-membrane-bound organelle	150 out of 652 genes, 23.0%	1025 out of 7288 background genes, 14.1%	2.76e-08	POP5:ECM1:MCM2:PKC1:RFC5:MRPL36:CDC47:ENP1:REI1:MRPL37:RRP7:PWP2:PAT1:MCD1:SIR2:LHP1:TSR1:MRPL11:NHP2:SHS1:GCS1:RRP8:RRP1:ARX1:RPA14:RSM24:YDR239C:MRPL35:MRP1:UTP5:UTP6:UTR2:RPL12A:POL5:NUG1:SPC25:RAD51:LSM4:NSA2:PAB1:CDC14:MNP1:DBP3:NSA1:RPL1B:RPL9A:GCN1:SLX9:MRP13:NOP7:UTP8:NSR1:MRPL9:YGR251W:MRP4:OTU2:RPL8A:SBP1:ARD1:GIC1:RPP1:SSF1:CDC12:DBP8:NMD3:UTP9:IRR1:YIL091C:RSM25:AXL2:SQT1:NOP9:MRPL8:M…	5677:5678:932:790:30686:30687:794:795:142:30688:42555:144:798:5823:31415:5829:5688:30478:30690:30691:1400:228:5619:5830:5761:5762:5763:31428:5768:30121:5628:5840:5842:5843:818:30136:5634:172:5850:30427:5783:5856:9277:16281:30869:5643:5934:5935:5938:5793:43614:32040:5724:5654:5655:5656:5940:5876:43332:775:776:778:5802:5730:5732:5662:5736:5663:5737:5666:5739:922:5884:5887:780:781:783:131:788:5816:4…
43234	protein complex	177 out of 652 genes, 27.1%	1291 out of 7288 background genes, 17.7%	8.43e-08	PTA1:GCV3:NUP60:MCM2:APL3:ALG14:RFC5:RXT2:MRPL36:SUP45:CDC47:TRS20:REI1:MRPL37:SSH1:ILV6:RRP43:PAT1:CDC39:MCD1:SIR2:GET3:RRP42:RPC53:MRPL11:LCB2:ARX1:RPA14:TAF10:RSM24:UBC1:RVB1:UME6:MNN10:MRPL35:GPI8:MRP1:EDC3:ANP1:RAD23:RPL12A:AFG3:SPC25:SRB4:GAL83:RNR1:TRP2:NUP157:GLE2:KAP123:NIC96:CDC14:RSC8:KAP122:STT3:RPT6:RPB9:NUP145:ARC1:TAF6:ITC1:RPL1B:RPL9A:CDC55:PAC10:TOM20:MRP13:RRP46:SPT6:SKI6:MRPL9:…	5677:5960:5678:932:790:46695:42555:145:798:502:508:31415:5829:31417:5685:5759:5971:30904:30690:30691:17059:220:221:31207:5830:159:1405:5835:5762:5763:5768:32806:8023:30121:30122:30123:42645:5624:18444:5840:5842:5770:5843:5845:812:5847:5849:818:16272:31942:31588:43529:30136:243:8250:5634:176:5850:177:5851:8540:8541:5852:5783:5784:5789:16281:31011:108:30869:5641:5643:329:31307:5934:8623:9353:5935:5…
44444	cytoplasmic part	316 out of 652 genes, 48.5%	2700 out of 7288 background genes, 37.0%	1.09e-07	ERP2:PMT2:GCV3:SCT1:APL3:ILS1:RER2:MNN2:KAP104:ALG14:PHO88:GRS1:MRPL36:SUP45:TOS1:NPL4:FZO1:MBA1:ENP1:TRS20:TSC10:REI1:MRPL37:SSH1:ILV6:ADP1:PGK1:FEN1:RRP43:PER1:PWP2:PAT1:SLC1:GET3:RRP42:COP1:DLD2:SEC31:MRPL11:ACK1:SHS1:GCS1:MRH1:YDR061W:LCB2:ARX1:TRM1:SEC7:RSM24:SLY1:MSS116:MSC2:RTN1:YDR239C:MNN10:CCC2:SUR2:GPI11:MRPL35:GPI8:MRP1:YDR352W:ATO3:STE14:NHX1:RIB3:FPR2:IRC22:EDC3:SPF1:ANP1:RAD23:UTR2…	5960:932:790:30684:30686:30687:795:142:30688:144:145:502:5823:31415:5681:5829:31417:5758:5759:5971:30904:30478:30690:30691:17059:220:221:1400:31207:5619:5830:1405:5761:5835:5762:5763:5768:8023:30121:30122:30123:5621:30125:5622:19898:30126:42645:30127:5624:18444:5628:5840:5842:5770:5843:5845:5773:5774:5849:5777:5779:45121:16272:31942:30134:43529:30136:8250:30137:5634:5635:5637:176:5850:177:5851:85…
12505	endomembrane system	58 out of 652 genes, 8.9%	298 out of 7288 background genes, 4.1%	2.52e-06	NUP60:APL3:ALG14:NPL4:SSH1:FEN1:COP1:SEC31:LCB2:TRM1:RTN1:CCC2:GPI11:GPI8:STE14:FPR2:SPF1:GAL83:NUP157:GLE2:KAP123:NIC96:RET2:KAP122:STT3:NUP145:CHC1:CSE1:CAX4:SNL1:APQ12:NUP159:NUP82:LAS21:TRL1:VPS35:LAA1:GPI14:NUP85:NUP100:APL2:SAC1:NUP133:NUP2:SUR4:SEC39:HMG2:NDC1:HMG1:NUP188:NUP53:LCB1:CYB5:YNL181W:SEC21:NUP1:SEC62:KES1	790:5759:30904:17059:31207:5768:30121:30122:30125:19898:30126:30127:5624:5840:31588:30136:8250:5634:5635:5637:5783:5784:5789:5641:5643:5792:5794:43541:12510:5654:42175:5737:5739:5887:139:5741:16020:5816:30173:42765:30176
30684	preribosome	10 out of 652 genes, 1.5%	15 out of 7288 background genes, 0.2%	2.32e-05	ENP1:PWP2:NSA2:SLX9:NOC3:RSA3:DBP6:NOB1:NOC2:NOG1	30684:30686:30687:30688:30690:30691:5634:5730:5732:5737:5739
30685	nucleolar preribosome	9 out of 652 genes, 1.4%	14 out of 7288 background genes, 0.2%	0.00017	ENP1:PWP2:NSA2:SLX9:NOC3:RSA3:DBP6:NOC2:NOG1	30686:30687:30688:30690:30691:5634:5730:5732:5737:5739
30529	ribonucleoprotein complex	91 out of 652 genes, 14.0%	618 out of 7288 background genes, 8.5%	0.00023	POP5:MRPL36:ENP1:REI1:MRPL37:SRO9:PWP2:PAT1:MRPL11:NHP2:SSB1:ARX1:RSM24:YDR239C:MRPL35:MRP1:UTP5:UTP6:RPL12A:LSM4:NSA2:PAB1:BRR2:ECM32:MNP1:PRP43:RPL1B:RPL9A:GCN1:SLX9:MRP13:UTP8:MRPL9:MRP4:OTU2:RPL8A:ARD1:RPP1:NAM8:NMD3:UTP9:RSM25:SQT1:MRPL8:MRPL49:UTP10:ALB1:TIF2:LAA1:SUI2:RSM7:MRPL38:SNU114:MRPL20:YLL032C:PRP19:NOC3:SIK1:RSA3:UTP13:YEF3:PRP39:RSE1:RPS1B:UTP14:SEC65:YMR086W:UTP15:BCH1:RPL20A:HR…	932:30684:30686:30687:30688:31415:5681:5682:5829:5685:5686:5688:30690:30691:5830:5761:5762:5763:31428:30121:5625:5840:5842:5843:5844:30136:243:5634:172:5850:5783:5786:16281:30869:43614:32040:5654:5655:5730:5732:5737:5739:30530:46540:30532
5635	nuclear envelope	27 out of 652 genes, 4.1%	109 out of 7288 background genes, 1.5%	0.00026	NUP60:TRM1:GAL83:NUP157:GLE2:KAP123:NIC96:KAP122:NUP145:CSE1:SNL1:APQ12:NUP159:NUP82:TRL1:NUP85:NUP100:NUP133:NUP2:SEC39:HMG2:NDC1:HMG1:NUP188:NUP53:YNL181W:NUP1	790:5759:31588:5634:5635:5637:5783:5789:5641:5643:5654:5737:5739:16020:5816
31965	nuclear membrane	19 out of 652 genes, 2.9%	61 out of 7288 background genes, 0.8%	0.00028	NUP60:TRM1:NUP157:GLE2:KAP123:NIC96:KAP122:NUP145:NUP159:NUP82:TRL1:NUP85:NUP100:NUP133:NUP2:NDC1:NUP188:NUP53:NUP1	790:5634:5635:5637:5643:5654:5737:5739:5816
44453	nuclear membrane part	19 out of 652 genes, 2.9%	61 out of 7288 background genes, 0.8%	0.00028	NUP60:TRM1:NUP157:GLE2:KAP123:NIC96:KAP122:NUP145:NUP159:NUP82:TRL1:NUP85:NUP100:NUP133:NUP2:NDC1:NUP188:NUP53:NUP1	790:5634:5635:5637:5643:5654:5737:5739:5816
44425	membrane part	90 out of 652 genes, 13.8%	614 out of 7288 background genes, 8.4%	0.00034	NUP60:APL3:ALG14:NPL4:FZO1:TSC10:SSH1:ADP1:CWH43:FEN1:ERP3:COP1:SEC31:LCB2:TRM1:RTN1:CCC2:GPI11:GPI8:STE14:FPR2:SPF1:CAN1:AFG3:VTC1:NUP157:GLE2:KAP123:SCS2:NIC96:RET2:PMA1:KAP122:STT3:NUP145:CHC1:YGR012W:CAX4:TOM20:APL6:YHR003C:SKG6:SNL1:TIM44:NUP159:AXL2:NUP82:LAS21:TRL1:PAM16:URA2:TIM17:VPS35:LAA1:OPT1:GPI14:NUP85:NUP100:VMA5:APL2:SAC1:VPS1:PAM17:NUP133:SEC22:NUP2:SUR4:VPS33:HMG2:YPT7:NDC1:SUR7…	790:5829:5759:30904:17059:220:221:31207:5619:1405:5768:30121:30122:30123:30125:19898:30126:30127:5624:5840:5770:5773:5777:5779:45121:31942:30136:8250:5634:5635:5637:5783:5784:46658:5789:5643:329:31307:5934:5935:5938:5792:5794:43541:31310:12510:5654:5940:42175:5737:5739:5886:5887:131:139:30897:16020:5741:5742:16021:5816:30173:42765:5743:5744:5745:30176
46930	pore complex	17 out of 652 genes, 2.6%	51 out of 7288 background genes, 0.7%	0.00037	NUP60:NUP157:GLE2:KAP123:NIC96:KAP122:NUP145:NUP159:NUP82:NUP85:NUP100:NUP133:NUP2:NDC1:NUP188:NUP53:NUP1	790:5634:5643:5737:5739:5816
5643	nuclear pore	17 out of 652 genes, 2.6%	51 out of 7288 background genes, 0.7%	0.00037	NUP60:NUP157:GLE2:KAP123:NIC96:KAP122:NUP145:NUP159:NUP82:NUP85:NUP100:NUP133:NUP2:NDC1:NUP188:NUP53:NUP1	790:5634:5643:5737:5739:5816
5783	endoplasmic reticulum	58 out of 652 genes, 8.9%	344 out of 7288 background genes, 4.7%	0.00045	PMT2:SCT1:RER2:ALG14:NPL4:TSC10:SSH1:ADP1:FEN1:PER1:GET3:LCB2:SLY1:MSC2:RTN1:SUR2:GPI11:GPI8:STE14:FPR2:IRC22:SPF1:SCS2:ERG4:STT3:ALG2:SCS3:TIP20:CAX4:ORM1:CHO2:LAG1:RPN1:NSG1:SNL1:YIL039W:APQ12:LAS21:OPT1:GPI14:LAC1:SAC1:SEC22:SUR4:SEC39:HMG2:NTE1:HMG1:SCJ1:LCB1:ALG11:CYB5:YNL181W:ZRG17:SEC62:GIP3:TYW1:YPR114W	5759:17059:31207:5624:5840:30134:43529:8250:5634:5635:8540:5783:5784:5788:5789:329:5792:5794:43541:42175:5737:5739:5887:16020:5741:16021:30173:42765:30176
31090	organelle membrane	90 out of 652 genes, 13.8%	619 out of 7288 background genes, 8.5%	0.00048	NUP60:APL3:ALG14:FZO1:MBA1:TSC10:SSH1:FEN1:PER1:COP1:SEC31:LCB2:TRM1:RTN1:CCC2:GPI11:GPI8:YDR352W:STE14:FPR2:SPF1:AFG3:VTC1:NUP157:GLE2:KAP123:YCK3:COX15:OXA1:VTC2:NIC96:RET2:KAP122:STT3:NUP145:CHC1:YGR012W:CAX4:TOM20:YHR003C:CTR2:SCH9:SNL1:TIM44:NUP159:NUP82:LAS21:TRL1:PAM16:TIM17:LAA1:GPI14:NUP85:NUP100:VMA5:OAC1:APL2:SAC1:VPS1:PAM17:NUP133:TPO1:NUP2:SUR4:VAC14:VPS33:HMG2:YPT7:YML018C:NDC1:HMG1…	790:5829:5759:17059:220:221:31207:1405:5768:30121:30122:30125:19898:42645:30126:30127:5624:5840:5770:5773:5774:5777:5779:31942:30136:8250:5634:5635:5637:5783:5784:5789:5643:31307:329:5933:5792:5794:43541:31310:12510:5654:42175:5737:5739:5886:5887:139:30897:16020:5741:16021:5742:5816:30173:42765:5743:5744:5745:30176
16020	membrane	138 out of 652 genes, 21.2%	1080 out of 7288 background genes, 14.8%	0.00115	NUP60:APL3:TAT1:ALG14:IST2:PHO88:NPL4:FZO1:MBA1:TSC10:SSH1:ADP1:CWH43:FEN1:PER1:ERP3:COP1:SEC31:MRH1:LCB2:TRM1:MSC2:RTN1:CCC2:GPI11:GPI8:YDR352W:ATO3:STE14:FPR2:SPF1:CAN1:AFG3:GAL83:VTC1:NUP157:GLE2:KAP123:SHO1:SCS2:YCK3:COX15:FTR1:OXA1:VTC2:NIC96:RET2:PMA1:KAP122:STT3:NUP145:CHC1:CSE1:YGR012W:CAX4:TOM20:RSR1:HIP1:APL6:YHR003C:SKG6:CTR2:PPX1:SCH9:SNL1:TIM44:APQ12:NUP159:AXL2:NUP82:LAS21:TRL1:PAM1…	790:144:5829:5759:30904:17059:220:221:1400:31207:5619:1405:5768:30121:30122:30123:5621:30125:19898:42645:30126:30127:5624:5628:5840:5770:5773:5774:5777:5779:45121:31942:31588:30136:8250:5634:5635:5637:5783:5784:46658:5789:5641:5643:31307:329:5933:5934:5935:5937:5938:5792:5794:43541:31310:12510:5654:5940:43332:42175:5801:5737:5739:5886:5887:131:136:139:30897:5741:16020:5742:16021:5816:30173:42765:…
30687	nucleolar preribosome, large subunit precursor	6 out of 652 genes, 0.9%	7 out of 7288 background genes, 0.1%	0.00123	NSA2:NOC3:RSA3:DBP6:NOC2:NOG1	30687:30690:30691:5634:5730:5739
Cluster 2
Genes
YBR236C	ABD1	YBR236C
YEL052W	AFG1	YEL052W
YBR132C	AGP2	YBR132C
YMR092C	AIP1	YMR092C
YOR374W	ALD4	YOR374W
YBR110W	ALG1	YBR110W
YNL219C	ALG9	YNL219C
YPR180W	AOS1	YPR180W
YIL062C	ARC15	YIL062C
YLR370C	ARC18	YLR370C
YKL013C	ARC19	YKL013C
YNR035C	ARC35	YNR035C
YOR094W	ARF3	YOR094W
YBR211C	AME1	YBR211C
YNL059C	ARP5	YNL059C
YDL088C	ASM4	YDL088C
YBL069W	AST1	YBL069W
YOR377W	ATF1	YOR377W
YNL315C	ATP11	YNL315C
YLR295C	ATP14	YLR295C
YPL271W	ATP15	YPL271W
YBR039W	ATP3	YBR039W
YPL078C	ATP4	YPL078C
YNL259C	ATX1	YNL259C
YNR007C	ATG3	YNR007C
YDL070W	BDF2	YDL070W
YDR099W	BMH2	YDR099W
YBR290W	BSD2	YBR290W
YDR252W	BTT1	YDR252W
YER159C	BUR6	YER159C
YKL007W	CAP1	YKL007W
YIL034C	CAP2	YIL034C
YKR066C	CCP1	YKR066C
YAL041W	CDC24	YAL041W
YDR054C	CDC34	YDR054C
YDL165W	CDC36	YDL165W
YDR168W	CDC37	YDR168W
YDR364C	CDC40	YDR364C
YDL017W	CDC7	YDL017W
YGL130W	CEG1	YGL130W
YIL035C	CKA1	YIL035C
YGR167W	CLC1	YGR167W
YBR109C	CMD1	YBR109C
YLR433C	CNA1	YLR433C
YBL045C	COR1	YBL045C
YOR316C	COT1	YOR316C
YNL052W	COX5A	YNL052W
YMR256C	COX7	YMR256C
YLR395C	COX8	YLR395C
YNL027W	CRZ1	YNL027W
YKL049C	CSE4	YKL049C
YBR036C	CSG2	YBR036C
YKL139W	CTK1	YKL139W
YDR304C	CPR5	YDR304C
YER143W	DDI1	YER143W
YDR068W	DOS2	YDR068W
YDR294C	DPL1	YDR294C
YMR276W	DSK2	YMR276W
YJR137C	ECM17	YJR137C
YBL101C	ECM21	YBL101C
YJL201W	ECM25	YJL201W
YNR030W	ALG12	YNR030W
YGR060W	ERG25	YGR060W
YMR015C	ERG5	YMR015C
YHR190W	ERG9	YHR190W
YML012W	ERV25	YML012W
YBR222C	PCS60	YBR222C
YKL060C	FBA1	YKL060C
YCR028C	FEN2	YCR028C
YFL041W	FET5	YFL041W
YBR207W	FTH1	YBR207W
YPL262W	FUM1	YPL262W
YOR375C	GDH1	YOR375C
YLR200W	YKE2	YLR200W
YDR505C	PSP1	YDR505C
YMR311C	GLC8	YMR311C
YDR272W	GLO2	YDR272W
YER122C	GLO3	YER122C
YHR005C	GPA1	YHR005C
YER020W	GPA2	YER020W
YPR160W	GPH1	YPR160W
YPL076W	GPI2	YPL076W
YOL056W	GPM3	YOL056W
YHR104W	GRE3	YHR104W
YOR185C	GSP2	YOR185C
YFR015C	GSY1	YFR015C
YML121W	GTR1	YML121W
YGL181W	GTS1	YGL181W
YBL021C	HAP3	YBL021C
YDL205C	HEM3	YDL205C
YIL020C	HIS6	YIL020C
YJR075W	HOC1	YJR075W
YER062C	HOR2	YER062C
YGL194C	HOS2	YGL194C
YMR027W	non	YMR027W
YMR186W	HSC82	YMR186W
YFL014W	HSP12	YFL014W
YBR072W	HSP26	YBR072W
YCR021C	HSP30	YCR021C
YDR258C	HSP78	YDR258C
YPL015C	HST2	YPL015C
YKL189W	HYM1	YKL189W
YIR037W	HYR1	YIR037W
YNL037C	IDH1	YNL037C
YOR136W	IDH2	YOR136W
YJL146W	IDS2	YJL146W
YLR309C	IMH1	YLR309C
YKL032C	IXR1	YKL032C
YJR091C	JSN1	YJR091C
YCL055W	KAR4	YCL055W
YDR483W	KRE2	YDR483W
YBR199W	KTR4	YBR199W
YKL103C	LAP4	YKL103C
YOR171C	LCB4	YOR171C
YOR196C	LIP5	YOR196C
YDR503C	LPP1	YDR503C
YPR073C	LTP1	YPR073C
YIR034C	LYS1	YIR034C
YIL094C	LYS12	YIL094C
YNR050C	LYS9	YNR050C
YHR024C	MAS2	YHR024C
YNL173C	MDG1	YNL173C
YKL085W	MDH1	YKL085W
YOL126C	MDH2	YOL126C
YFL016C	MDJ1	YFL016C
YPL270W	MDL2	YPL270W
YDL005C	MED2	YDL005C
YBR193C	MED8	YBR193C
YJR010W	MET3	YJR010W
YNL103W	MET4	YNL103W
YML062C	MFT1	YML062C
YJL042W	MHP1	YJL042W
YKL089W	MIF2	YKL089W
YNL085W	MKT1	YNL085W
YOR274W	MOD5	YOR274W
YOL088C	MPD2	YOL088C
YKL167C	MRP49	YKL167C
YKL142W	MRP8	YKL142W
YNL005C	MRP7	YNL005C
YOR150W	MRPL23	YOR150W
YMR193W	MRPL24	YMR193W
YGR076C	MRPL25	YGR076C
YBR282W	MRPL27	YBR282W
YKL138C	MRPL31	YKL138C
YCR003W	MRPL32	YCR003W
YMR286W	MRPL33	YMR286W
YHR147C	MRPL6	YHR147C
YBR251W	MRPS5	YBR251W
YER042W	MXR1	YER042W
YKL129C	MYO3	YKL129C
YGL122C	NAB2	YGL122C
YGR147C	NAT2	YGR147C
YLR457C	NBP1	YLR457C
YPR149W	NCE102	YPR149W
YML120C	NDI1	YML120C
YBR212W	NGR1	YBR212W
YDL002C	NHP10	YDL002C
YLR351C	NIT3	YLR351C
YDR432W	NPL3	YDR432W
YNL183C	NPR1	YNL183C
YDR001C	NTH1	YDR001C
YGL172W	NUP49	YGL172W
YHL020C	OPI1	YHL020C
YJR073C	OPI3	YJR073C
YJL002C	OST1	YJL002C
YBR279W	PAF1	YBR279W
YKL025C	PAN3	YKL025C
YKR002W	PAP1	YKR002W
YNL015W	PBI2	YNL015W
YCL052C	PBN1	YCL052C
YGR178C	PBP1	YGR178C
YER059W	PCL6	YER059W
YGR202C	PCT1	YGR202C
YER178W	PDA1	YER178W
YHR064C	SSZ1	YHR064C
YOR158W	PET123	YOR158W
YGL153W	PEX14	YGL153W
YDL065C	PEX19	YDL065C
YDR329C	PEX3	YDR329C
YJL179W	PFD1	YJL179W
YEL003W	GIM4	YEL003W
YNL153C	GIM3	YNL153C
YGR240C	PFK1	YGR240C
YBR196C	PGI1	YBR196C
YGR231C	PHB2	YGR231C
YPR113W	PIS1	YPR113W
YNL055C	POR1	YNL055C
YML016C	PPZ1	YML016C
YEL060C	PRB1	YEL060C
YOR362C	PRE10	YOR362C
YFR050C	PRE4	YFR050C
YOL038W	PRE6	YOL038W
YML092C	PRE8	YML092C
YGR075C	PRP38	YGR075C
YBR237W	PRP5	YBR237W
YNL118C	DCP2	YNL118C
YJR059W	PTK2	YJR059W
YOR157C	PUP1	YOR157C
YGR253C	PUP2	YGR253C
YHR037W	PUT2	YHR037W
YGL062W	PYC1	YGL062W
YAL038W	CDC19	YAL038W
YOR347C	PYK2	YOR347C
YDR529C	QCR7	YDR529C
YJL166W	QCR8	YJL166W
YML032C	RAD52	YML032C
YGL058W	RAD6	YGL058W
YNL098C	RAS2	YNL098C
YOR265W	RBL2	YOR265W
YJR068W	RFC2	YJR068W
YBL033C	RIB1	YBL033C
YOL143C	RIB4	YOL143C
YEL024W	RIP1	YEL024W
YGR180C	RNR4	YGR180C
YOR210W	RPB10	YOR210W
YJL140W	RPB4	YJL140W
YOR224C	RPB8	YOR224C
YNL330C	RPD3	YNL330C
YML091C	RPM2	YML091C
YFR004W	RPN11	YFR004W
YFR052W	RPN12	YFR052W
YDL147W	RPN5	YDL147W
YDR427W	RPN9	YDR427W
YIL153W	RRD1	YIL153W
YGL252C	RTG2	YGL252C
YOR014W	RTS1	YOR014W
YOR216C	RUD3	YOR216C
YCR009C	RVS161	YCR009C
YDR388W	RVS167	YDR388W
YFR040W	SAP155	YFR040W
YGL229C	SAP4	YGL229C
YKL117W	SBA1	YKL117W
YCR069W	CPR4	YCR069W
YPR129W	SCD6	YPR129W
YGL011C	SCL1	YGL011C
YDR178W	SDH4	YDR178W
YKL193C	SDS22	YKL193C
YIL084C	SDS3	YIL084C
YDR077W	SED1	YDR077W
YBL102W	SFT2	YBL102W
YPR161C	SGV1	YPR161C
YPL026C	SKS1	YPL026C
YKL130C	SHE2	YKL130C
YBR263W	SHM1	YBR263W
YBL058W	SHP1	YBL058W
YER068W	MOT2	YER068W
YNL007C	SIS1	YNL007C
YKR072C	SIS2	YKR072C
YDR328C	SKP1	YDR328C
YBL061C	SKT5	YBL061C
YHR030C	SLT2	YHR030C
YER029C	SMB1	YER029C
YFL008W	SMC1	YFL008W
YKL079W	SMY1	YKL079W
YPR032W	SRO7	YPR032W
YNR034W	SOL1	YNR034W
YPR069C	SPE3	YPR069C
YIL033C	BCY1	YIL033C
YBR253W	SRB6	YBR253W
YER103W	SSA4	YER103W
YDR293C	SSD1	YDR293C
YPL106C	SSE1	YPL106C
YBR169C	SSE2	YBR169C
YLR250W	SSP120	YLR250W
YDR086C	SSS1	YDR086C
YLR452C	SST2	YLR452C
YDR169C	STB3	YDR169C
YFL026W	STE2	YFL026W
YJR117W	STE24	YJR117W
YOR212W	STE4	YOR212W
YOR027W	STI1	YOR027W
YPR086W	SUA7	YPR086W
YJL176C	SWI3	YJL176C
YMR149W	SWP1	YMR149W
YJL004C	SYS1	YJL004C
YMR236W	TAF9	YMR236W
YPL011C	TAF3	YPL011C
YOR244W	ESA1	YOR244W
YPL048W	CAM1	YPL048W
YKL028W	TFA1	YKL028W
YNL039W	BDP1	YNL039W
YCR053W	THR4	YCR053W
YIL144W	TID3	YIL144W
YMR260C	TIF11	YMR260C
YGL049C	TIF4632	YGL049C
YKL058W	TOA2	YKL058W
YJL164C	TPK1	YJL164C
YPL203W	TPK2	YPL203W
YIL138C	TPM2	YIL138C
YBR126C	TPS1	YBR126C
YMR261C	TPS3	YMR261C
YGR209C	TRX2	YGR209C
YMR039C	SUB1	YMR039C
YGR080W	TWF1	YGR080W
YER100W	UBC6	YER100W
YGR048W	UFD1	YGR048W
YGR072W	UPF3	YGR072W
YKL216W	URA1	YKL216W
YJR103W	URA8	YJR103W
YNL229C	URE2	YNL229C
YJR049C	UTR1	YJR049C
YML115C	VAN1	YML115C
YBR105C	VID24	YBR105C
YGR105W	VMA21	YGR105W
YGR020C	VMA7	YGR020C
YOR089C	VPS21	YOR089C
YKL041W	VPS24	YKL041W
YNR006W	VPS27	YNR006W
YGL095C	VPS45	YGL095C
YEL002C	WBP1	YEL002C
YDL224C	WHI4	YDL224C
YAL032C	PRP45	YAL032C
YAL035W	FUN12	YAL035W
YAL061W	non	YAL061W
YBL036C	non	YBL036C
YBL046W	PSY4	YBL046W
YBL051C	PIN4	YBL051C
YBL064C	PRX1	YBL064C
YBR016W	non	YBR016W
YBR101C	FES1	YBR101C
YBR102C	EXO84	YBR102C
YBR149W	ARA1	YBR149W
YBR151W	APD1	YBR151W
YBR177C	EHT1	YBR177C
YBR214W	SDS24	YBR214W
YBR216C	YBP1	YBR216C
YBR227C	MCX1	YBR227C
YBR241C	non	YBR241C
YBR260C	RGD1	YBR260C
YBR262C	FMP51	YBR262C
YBR287W	ZSP1	YBR287W
YCL010C	SGF29	YCL010C
YCL028W	RNQ1	YCL028W
YCL035C	GRX1	YCL035C
YCL045C	non	YCL045C
YCR004C	YCP4	YCR004C
YCR027C	RHB1	YCR027C
YCR030C	SYP1	YCR030C
YDL015C	TSC13	YDL015C
YDL072C	YET3	YDL072C
YDL099W	BUG1	YDL099W
YDL110C	TMA17	YDL110C
YDL121C	non	YDL121C
YDL123W	SNA4	YDL123W
YDL161W	ENT1	YDL161W
YDL173W	non	YDL173W
YDL193W	NUS1	YDL193W
YDR003W	RCR2	YDR003W
YDR032C	PST2	YDR032C
YDR055W	PST1	YDR055W
YDR056C	non	YDR056C
YDR063W	non	YDR063W
YDR152W	GIR2	YDR152W
YDR202C	RAV2	YDR202C
YDR219C	MFB1	YDR219C
YDR229W	IVY1	YDR229W
YDR358W	GGA1	YDR358W
YDR372C	VPS74	YDR372C
YDR373W	FRQ1	YDR373W
YDR391C	non	YDR391C
YDR434W	GPI17	YDR434W
YDR458C	HEH2	YDR458C
YDR482C	CWC21	YDR482C
YDR486C	VPS60	YDR486C
YDR516C	EMI2	YDR516C
YER004W	FMP52	YER004W
YER030W	CHZ1	YER030W
YER034W	non	YER034W
YER035W	EDC2	YER035W
YER044C	ERG28	YER044C
YER067W	non	YER067W
YER080W	FMP29	YER080W
YER081W	SER3	YER081W
YER083C	GET2	YER083C
YER128W	non	YER128W
YKL065C	YET1	YKL065C
YFL013C	IES1	YFL013C
YFR010W	UBP6	YFR010W
YFR041C	ERJ5	YFR041C
YFR047C	BNA6	YFR047C
YGL004C	RPN14	YGL004C
YGL010W	non	YGL010W
YGL037C	PNC1	YGL037C
YGL039W	non	YGL039W
YGL056C	SDS23	YGL056C
YGL080W	FMP37	YGL080W
YGL082W	non	YGL082W
YGL129C	RSM23	YGL129C
YGL164C	YRB30	YGL164C
YGL174W	BUD13	YGL174W
YGL223C	COG1	YGL223C
YGL231C	non	YGL231C
YGR002C	SWC4	YGR002C
YGR026W	non	YGR026W
YGR106C	non	YGR106C
YGR111W	non	YGR111W
YGR120C	COG2	YGR120C
YGR136W	LSB1	YGR136W
YGR156W	PTI1	YGR156W
YGR165W	MRPS35	YGR165W
YGR205W	non	YGR205W
YGR206W	MVB12	YGR206W
YGR232W	NAS6	YGR232W
YGR235C	non	YGR235C
YGR243W	FMP43	YGR243W
YGR250C	non	YGR250C
YGR275W	RTT102	YGR275W
YGR284C	ERV29	YGR284C
YHL008C	non	YHL008C
YHL021C	FMP12	YHL021C
YHR059W	FYV4	YHR059W
YHR087W	non	YHR087W
YHR110W	ERP5	YHR110W
YHR114W	BZZ1	YHR114W
YHR146W	CRP1	YHR146W
YHR192W	non	YHR192W
YIL005W	EPS1	YIL005W
YIL041W	GVP36	YIL041W
YIL044C	AGE2	YIL044C
YIL105C	SLM1	YIL105C
YIL117C	PRM5	YIL117C
YIL135C	VHS2	YIL135C
YIL161W	non	YIL161W
YMR152W	YIM1	YMR152W
YIR003W	non	YIR003W
YJL029C	VPS53	YJL029C
YJL065C	DLS1	YJL065C
YJL082W	IML2	YJL082W
YJL091C	GWT1	YJL091C
YJL123C	non	YJL123C
YJL171C	non	YJL171C
YJL178C	ATG27	YJL178C
YJR014W	TMA22	YJR014W
YJR044C	VPS55	YJR044C
YJR083C	ACF4	YJR083C
YJR116W	non	YJR116W
YKL094W	YJU3	YKL094W
YKL023W	non	YKL023W
YKL040C	NFU1	YKL040C
YKL046C	DCW1	YKL046C
YKL059C	MPE1	YKL059C
YKL061W	non	YKL061W
YKL088W	non	YKL088W
YKL146W	AVT3	YKL146W
YKL204W	EAP1	YKL204W
YKL215C	non	YKL215C
YKR003W	OSH6	YKR003W
YKR007W	MEH1	YKR007W
YKR018C	non	YKR018C
YKR023W	non	YKR023W
YKR067W	GPT2	YKR067W
YKR100C	SKG1	YKR100C
YLL023C	non	YLL023C
YLL027W	ISA1	YLL027W
YLL029W	non	YLL029W
YLR074C	BUD20	YLR074C
YLR201C	COQ9	YLR201C
YLR219W	MSC3	YLR219W
YLR324W	PEX30	YLR324W
YLR350W	ORM2	YLR350W
YLR373C	VID22	YLR373C
YLR380W	CSR1	YLR380W
YLR421C	RPN13	YLR421C
YML020W	non	YML020W
YML071C	COG8	YML071C
YML101C	CUE4	YML101C
YML117W	NAB6	YML117W
YMR002W	MIC17	YMR002W
YMR009W	ADI1	YMR009W
YMR067C	UBX4	YMR067C
YMR099C	non	YMR099C
YMR112C	MED11	YMR112C
YMR148W	non	YMR148W
YMR184W	ADD37	YMR184W
YMR188C	MRPS17	YMR188C
YMR200W	ROT1	YMR200W
YMR255W	GFD1	YMR255W
YFR049W	YMR31	YFR049W
YKL067W	YNK1	YKL067W
YNL051W	COG5	YNL051W
YNL091W	NST1	YNL091W
YNL100W	non	YNL100W
YNL156C	NSG2	YNL156C
YNL157W	IGO1	YNL157W
YNL158W	PGA1	YNL158W
YNL166C	BNI5	YNL166C
YNL180C	RHO5	YNL180C
YNL215W	IES2	YNL215W
YNL224C	SQS1	YNL224C
YNL255C	GIS2	YNL255C
YNL264C	PDR17	YNL264C
YNL281W	HCH1	YNL281W
YNL288W	CAF40	YNL288W
YNL310C	ZIM17	YNL310C
YNL326C	PFA3	YNL326C
YNR014W	non	YNR014W
YNR024W	non	YNR024W
YLR059C	REX2	YLR059C
YOL060C	MAM3	YOL060C
YOR016C	ERP4	YOR016C
YOR104W	PIN2	YOR104W
YOR112W	non	YOR112W
YOR118W	non	YOR118W
YOR131C	non	YOR131C
YOR163W	DDP1	YOR163W
YOR189W	IES4	YOR189W
YOR215C	non	YOR215C
YOR220W	WSP1	YOR220W
YOR262W	non	YOR262W
YOR273C	TPO4	YOR273C
YOR281C	PLP2	YOR281C
YOR285W	non	YOR285W
YOR356W	non	YOR356W
YPL014W	non	YPL014W
YPL047W	SGF11	YPL047W
YPL087W	YDC1	YPL087W
YPL105C	non	YPL105C
GO Enrichments
Process
GOID	GO_term	Cluster frequency	Background frequency	P-value	Gene(s) annotated to the term	Directly Annotated GOID List
9987	cellular process	414 out of 517 genes, 80.1%	4701 out of 7288 background genes, 64.5%	8.9e-13	PRP45:FUN12:CDC19:CDC24:HAP3:RIB1:YBL036C:COR1:PSY4:PIN4:SHP1:SKT5:PRX1:AST1:ECM21:SFT2:CSG2:ATP3:HSP26:FES1:EXO84:VID24:CMD1:ALG1:TPS1:AGP2:SSE2:EHT1:MED8:PGI1:KTR4:FTH1:AME1:NGR1:SDS24:YBP1:ABD1:PRP5:MRPS5:SRB6:RGD1:SHM1:PAF1:MRPL27:BSD2:SGF29:GRX1:PBN1:KAR4:MRPL32:RVS161:RHB1:FEN2:THR4:NHP10:MED2:TSC13:CDC7:PEX19:ASM4:BUG1:RPN5:ENT1:CDC36:NUS1:HEM3:WHI4:NTH1:CDC34:PST1:SED1:SSS1:BMH2:CDC37:SDH…	15879:8295:8298:42989:6696:6400:7131:6402:1682:9749:7062:6260:6406:6261:6407:7064:6408:6409:31124:6338:7067:147:31126:51016:15959:722:6914:15887:723:42994:727:5975:16255:5977:5978:5979:6412:6413:51382:6342:1:6270:19236:2:226:6272:31204:48017:42493:6348:32872:43001:1402:1403:730:5980:6855:5981:6783:17062:19677:32447:45116:16192:30846:45045:30847:301:45046:16197:6350:19243:7155:161:6354:6281:6355:6…
6457	protein folding	23 out of 517 genes, 4.4%	83 out of 7288 background genes, 1.1%	7.67e-06	HSP26:SSE2:PEX19:BTT1:HSP78:GIM4:SSA4:MDJ1:ERJ5:PHB2:PFD1:SBA1:YKE2:HSC82:ROT1:SIS1:GIM3:HCH1:ZIM17:MPD2:STI1:RBL2:SSE1	723:6413:2:226:45046:6508:6950:6457:6458:6616:51083:6986:6625:7005:7010:7021:7023:7025:43248:45861:7031:30150:42026:7047:1302
8152	metabolic process	311 out of 517 genes, 60.2%	3509 out of 7288 background genes, 48.1%	9.04e-06	PRP45:FUN12:CDC19:HAP3:RIB1:YBL036C:COR1:PSY4:SHP1:SKT5:PRX1:CSG2:ATP3:HSP26:FES1:EXO84:VID24:ALG1:TPS1:AGP2:ARA1:SSE2:EHT1:MED8:PGI1:KTR4:SDS24:YBP1:ABD1:PRP5:MRPS5:SRB6:SHM1:PAF1:MRPL27:BSD2:SGF29:GRX1:PBN1:KAR4:MRPL32:THR4:NHP10:MED2:TSC13:CDC7:PEX19:ASM4:RPN5:CDC36:HEM3:NTH1:CDC34:BMH2:SDH4:RAV2:MFB1:BTT1:HSP78:GLO2:DPL1:SKP1:GGA1:CDC40:RPN9:GPI17:KRE2:LPP1:EMI2:QCR7:WBP1:GIM4:RIP1:PRB1:SMB1:…	15879:8295:8298:42989:6696:6400:7131:6402:1682:9749:7062:6260:6406:6261:6407:7064:6408:6409:31124:6338:31126:51016:15959:6914:722:723:42994:727:5975:16255:5977:5978:5979:6412:6413:51382:6342:1:6270:2:226:6272:42493:6348:1402:730:5980:6855:5981:6783:17062:19677:32447:45116:16192:30846:30847:45046:6350:19243:7155:6354:6281:6355:6356:15031:6357:6359:31146:9408:42144:9267:742:9269:6865:747:5992:5993:…
44237	cellular metabolic process	304 out of 517 genes, 58.8%	3429 out of 7288 background genes, 47.0%	1.84e-05	PRP45:FUN12:CDC19:HAP3:RIB1:YBL036C:COR1:PSY4:SHP1:SKT5:PRX1:CSG2:ATP3:HSP26:FES1:EXO84:VID24:ALG1:TPS1:AGP2:SSE2:EHT1:MED8:PGI1:KTR4:SDS24:YBP1:ABD1:PRP5:MRPS5:SRB6:SHM1:PAF1:MRPL27:BSD2:SGF29:GRX1:PBN1:KAR4:MRPL32:THR4:NHP10:MED2:TSC13:CDC7:PEX19:ASM4:RPN5:CDC36:HEM3:NTH1:CDC34:BMH2:SDH4:MFB1:BTT1:HSP78:GLO2:DPL1:SKP1:GGA1:CDC40:RPN9:GPI17:KRE2:LPP1:EMI2:QCR7:WBP1:GIM4:RIP1:PRB1:SMB1:CHZ1:EDC2:…	15879:8295:8298:42989:6696:6400:7131:6402:1682:9749:7062:6260:6406:6261:6407:7064:6408:6409:31124:6338:31126:51016:15959:6914:722:723:42994:727:5975:16255:5977:5978:5979:6412:6413:51382:6342:1:6270:2:226:6272:42493:6348:1402:730:5980:6855:5981:6783:17062:19677:32447:45116:16192:30846:30847:45046:6350:19243:7155:6354:6281:6355:6356:15031:6357:6359:31146:9408:42144:9267:742:9269:6865:747:5992:5993:…
44257	cellular protein catabolic process	31 out of 517 genes, 6.0%	156 out of 7288 background genes, 2.1%	0.00011	SHP1:BSD2:PBN1:RPN5:CDC34:MFB1:SKP1:GGA1:RPN9:PRB1:UBC6:DDI1:RPN11:PRE4:RPN12:RPN14:SCL1:RAD6:UFD1:PUP2:VPS24:LAP4:VID22:CSR1:PRE8:UBX4:ADD37:DSK2:PRE6:PUP1:PRE10	723:5977:51382:45116:16192:6281:15031:31146:9267:6506:6508:7096:6511:6513:30433:30435:30437:6950:30001:910:6895:6896:6461:6397:6623:45324:42787:7005:16485:43161:43162:15914:16574:82:7103:6301:86:43254:43328:7035:7039:7047:51865:209
6508	proteolysis	33 out of 517 genes, 6.4%	173 out of 7288 background genes, 2.4%	0.00011	SHP1:BSD2:PBN1:RPN5:CDC34:MFB1:SKP1:GGA1:RPN9:UBC6:DDI1:MDJ1:RPN11:PRE4:RPN12:RPN14:SCL1:RAD6:UFD1:PHB2:NAS6:PUP2:VPS24:CSR1:RPN13:PRE8:UBX4:ADD37:DSK2:PBI2:PRE6:PUP1:PRE10	723:5977:51382:45116:16192:6281:15031:31146:42144:6506:6508:7096:6511:6513:30433:30435:30437:6950:30001:6457:910:6895:6896:6461:6397:6623:45324:42787:7005:16485:43161:43162:15914:16574:45861:82:7103:6301:86:43254:43328:7035:7047:1302:30162:51865:209
44238	primary metabolic process	282 out of 517 genes, 54.5%	3207 out of 7288 background genes, 44.0%	0.00039	PRP45:FUN12:CDC19:HAP3:YBL036C:PSY4:SHP1:SKT5:CSG2:ATP3:HSP26:FES1:EXO84:VID24:ALG1:TPS1:AGP2:ARA1:SSE2:EHT1:MED8:PGI1:KTR4:SDS24:ABD1:PRP5:MRPS5:SRB6:PAF1:MRPL27:BSD2:SGF29:PBN1:KAR4:MRPL32:THR4:NHP10:MED2:TSC13:CDC7:PEX19:ASM4:RPN5:CDC36:NTH1:CDC34:BMH2:SDH4:RAV2:MFB1:BTT1:HSP78:GLO2:DPL1:SKP1:GGA1:CDC40:RPN9:GPI17:KRE2:LPP1:EMI2:QCR7:WBP1:GIM4:PRB1:SMB1:CHZ1:EDC2:ERG28:PCL6:HOR2:MOT2:SER3:UBC6…	15879:8295:8298:42989:6696:6400:7131:6402:1682:9749:7062:6260:6406:6261:6407:7064:6408:6409:31124:6338:31126:51016:15959:6914:722:723:42994:727:5975:16255:5977:5978:5979:6412:6413:51382:6342:6270:2:226:6272:42493:6348:1402:730:5980:6855:5981:17062:19677:32447:45116:16192:30846:30847:45046:6350:19243:6354:6281:6355:6356:15031:6357:6359:31146:9408:42144:9267:742:6865:747:5992:5993:749:17148:6501:80…
44265	cellular macromolecule catabolic process	46 out of 517 genes, 8.9%	303 out of 7288 background genes, 4.2%	0.00052	CDC19:SHP1:PGI1:BSD2:PBN1:RPN5:CDC36:NTH1:CDC34:MFB1:SKP1:GGA1:RPN9:PRB1:EDC2:PCL6:MOT2:UBC6:DDI1:RPN11:PRE4:RPN12:RPN14:SCL1:RAD6:UFD1:UPF3:PFK1:PUP2:GRE3:RPB4:JSN1:VPS24:FBA1:LAP4:VID22:CSR1:PRE8:UBX4:ADD37:DSK2:DCP2:PRE6:PUP1:PRE10:GPH1	6402:6406:723:5977:5979:51382:5980:5981:45116:16192:6281:15031:6357:31146:9267:747:5993:749:6506:6508:6366:7096:6368:31087:6511:6513:184:30433:30435:30437:6950:30001:910:6895:6896:6461:6397:288:289:42843:6623:290:45324:42787:7005:16485:43161:43162:16567:74:15914:16574:82:7103:6301:86:43254:43328:7035:6090:7039:6094:6096:6098:19568:122:7047:51865:209
30163	protein catabolic process	31 out of 517 genes, 6.0%	170 out of 7288 background genes, 2.3%	0.00081	SHP1:BSD2:PBN1:RPN5:CDC34:MFB1:SKP1:GGA1:RPN9:PRB1:UBC6:DDI1:RPN11:PRE4:RPN12:RPN14:SCL1:RAD6:UFD1:PUP2:VPS24:LAP4:VID22:CSR1:PRE8:UBX4:ADD37:DSK2:PRE6:PUP1:PRE10	723:5977:51382:45116:16192:6281:15031:31146:9267:6506:6508:7096:6511:6513:30433:30435:30437:6950:30001:910:6895:6896:6461:6397:6623:45324:42787:7005:16485:43161:43162:15914:16574:82:7103:6301:86:43254:43328:7035:7039:7047:51865:209
19941	modification-dependent protein catabolic process	28 out of 517 genes, 5.4%	145 out of 7288 background genes, 2.0%	0.00085	SHP1:BSD2:PBN1:RPN5:CDC34:MFB1:SKP1:GGA1:RPN9:UBC6:DDI1:RPN11:PRE4:RPN12:RPN14:SCL1:RAD6:UFD1:PUP2:VPS24:CSR1:PRE8:UBX4:ADD37:DSK2:PRE6:PUP1:PRE10	723:5977:51382:45116:16192:6281:15031:31146:6506:6508:7096:6511:6513:30433:30435:30437:6950:30001:910:6895:6896:6461:6397:6623:45324:42787:7005:16485:43161:43162:15914:16574:82:7103:6301:86:43254:43328:7035:7047:51865:209
6511	ubiquitin-dependent protein catabolic process	28 out of 517 genes, 5.4%	145 out of 7288 background genes, 2.0%	0.00085	SHP1:BSD2:PBN1:RPN5:CDC34:MFB1:SKP1:GGA1:RPN9:UBC6:DDI1:RPN11:PRE4:RPN12:RPN14:SCL1:RAD6:UFD1:PUP2:VPS24:CSR1:PRE8:UBX4:ADD37:DSK2:PRE6:PUP1:PRE10	723:5977:51382:45116:16192:6281:15031:31146:6506:6508:7096:6511:6513:30433:30435:30437:6950:30001:910:6895:6896:6461:6397:6623:45324:42787:7005:16485:43161:43162:15914:16574:82:7103:6301:86:43254:43328:7035:7047:51865:209
51603	proteolysis involved in cellular protein catabolic process	28 out of 517 genes, 5.4%	147 out of 7288 background genes, 2.0%	0.00113	SHP1:BSD2:PBN1:RPN5:CDC34:MFB1:SKP1:GGA1:RPN9:UBC6:DDI1:RPN11:PRE4:RPN12:RPN14:SCL1:RAD6:UFD1:PUP2:VPS24:CSR1:PRE8:UBX4:ADD37:DSK2:PRE6:PUP1:PRE10	723:5977:51382:45116:16192:6281:15031:31146:6506:6508:7096:6511:6513:30433:30435:30437:6950:30001:910:6895:6896:6461:6397:6623:45324:42787:7005:16485:43161:43162:15914:16574:82:7103:6301:86:43254:43328:7035:7047:51865:209
43632	modification-dependent macromolecule catabolic process	28 out of 517 genes, 5.4%	152 out of 7288 background genes, 2.1%	0.00228	SHP1:BSD2:PBN1:RPN5:CDC34:MFB1:SKP1:GGA1:RPN9:UBC6:DDI1:RPN11:PRE4:RPN12:RPN14:SCL1:RAD6:UFD1:PUP2:VPS24:CSR1:PRE8:UBX4:ADD37:DSK2:PRE6:PUP1:PRE10	723:5977:51382:45116:16192:6281:15031:31146:6506:6508:7096:6511:6513:30433:30435:30437:6950:30001:910:6895:6896:6461:6397:6623:45324:42787:7005:16485:43161:43162:15914:16574:82:7103:6301:86:43254:43328:7035:7047:51865:209
43285	biopolymer catabolic process	40 out of 517 genes, 7.7%	267 out of 7288 background genes, 3.7%	0.00423	SHP1:BSD2:PBN1:RPN5:CDC36:CDC34:MFB1:SKP1:GGA1:RPN9:PRB1:EDC2:PCL6:MOT2:UBC6:DDI1:RPN11:PRE4:RPN12:RPN14:SCL1:RAD6:UFD1:UPF3:PUP2:RPB4:JSN1:VPS24:LAP4:VID22:CSR1:PRE8:UBX4:ADD37:DSK2:DCP2:PRE6:PUP1:PRE10:GPH1	6402:6406:723:5977:5979:51382:5980:5981:45116:16192:6281:15031:6357:31146:9267:747:749:6506:6508:6366:7096:6368:31087:6511:6513:184:30433:30435:30437:6950:30001:910:6895:6896:6461:6397:288:289:6623:290:45324:42787:7005:16485:43161:43162:16567:74:15914:16574:82:7103:6301:86:43254:43328:7035:7039:122:7047:51865:209
44248	cellular catabolic process	54 out of 517 genes, 10.4%	409 out of 7288 background genes, 5.6%	0.00473	CDC19:SHP1:PGI1:BSD2:PBN1:RPN5:CDC36:NTH1:CDC34:SDH4:MFB1:GLO2:SKP1:GGA1:RPN9:PRB1:EDC2:PCL6:MOT2:UBC6:DDI1:RPN11:PRE4:RPN12:RPN14:SCL1:RAD6:UFD1:UPF3:PFK1:PUP2:PUT2:GRE3:RPB4:JSN1:VPS24:FBA1:MDH1:LAP4:VID22:CSR1:PRE8:UBX4:ADD37:DSK2:IDH1:DCP2:PRE6:IDH2:PUP1:YOR356W:PRE10:FUM1:GPH1	6402:6406:723:5975:5977:5979:51382:5980:5981:19677:45116:16192:19243:6281:15031:6357:31146:9267:747:5993:749:6506:6508:6366:7096:6368:31087:6511:6513:184:30433:30435:30437:6950:30001:910:6895:6896:6461:6537:6397:6102:6106:10133:6108:288:289:42843:6623:290:6121:45324:6562:42787:7005:16485:43161:43162:16567:74:15914:16574:82:7103:6301:86:43254:43328:7035:6090:7039:6094:6096:6098:6099:19568:122:7047…
16043	cellular component organization and biogenesis	200 out of 517 genes, 38.7%	2183 out of 7288 background genes, 30.0%	0.00672	FUN12:CDC24:SHP1:SKT5:AST1:ECM21:SFT2:EXO84:CMD1:AGP2:FTH1:AME1:NGR1:SDS24:PRP5:PAF1:BSD2:SGF29:KAR4:RVS161:RHB1:FEN2:THR4:NHP10:PEX19:ASM4:BUG1:ENT1:NUS1:WHI4:PST1:SED1:SSS1:BMH2:CDC37:RAV2:MFB1:IVY1:HSP78:SSD1:SKP1:PEX3:GGA1:CDC40:VPS74:RVS167:NPL3:KRE2:VPS60:QCR7:GPA2:CHZ1:MOT2:GET2:SSA4:GLO3:SMC1:IES1:STE2:ERJ5:PNC1:YGL039W:TIF4632:RAD6:VPS45:NAB2:PEX14:NUP49:BUD13:GTS1:HOS2:COG1:RTG2:SWC4:VM…	15879:8298:42989:6402:1682:7062:6406:6261:6407:7064:6408:6409:31124:6338:7067:147:31126:51016:722:6914:15887:723:42994:727:5977:6412:6413:51382:6342:1:2:226:6272:31204:42493:6348:32872:43001:1402:1403:730:6855:17062:32447:45116:16192:30846:45045:30847:301:45046:16197:161:6354:6281:6355:6356:6357:6359:31146:9408:8608:42144:742:42147:6865:747:749:17148:45053:6501:8033:6360:7165:245:6366:6367:7096:6…
9057	macromolecule catabolic process	46 out of 517 genes, 8.9%	333 out of 7288 background genes, 4.6%	0.00758	CDC19:SHP1:PGI1:BSD2:PBN1:RPN5:CDC36:NTH1:CDC34:MFB1:SKP1:GGA1:RPN9:PRB1:EDC2:PCL6:MOT2:UBC6:DDI1:RPN11:PRE4:RPN12:RPN14:SCL1:RAD6:UFD1:UPF3:PFK1:PUP2:GRE3:RPB4:JSN1:VPS24:FBA1:LAP4:VID22:CSR1:PRE8:UBX4:ADD37:DSK2:DCP2:PRE6:PUP1:PRE10:GPH1	6402:6406:723:5977:5979:51382:5980:5981:45116:16192:6281:15031:6357:31146:9267:747:5993:749:6506:6508:6366:7096:6368:31087:6511:6513:184:30433:30435:30437:6950:30001:910:6895:6896:6461:6397:288:289:42843:6623:290:45324:42787:7005:16485:43161:43162:16567:74:15914:16574:82:7103:6301:86:43254:43328:7035:6090:7039:6094:6096:6098:19568:122:7047:51865:209
Function
GOID	GO_term	Cluster frequency	Background frequency	P-value	Gene(s) annotated to the term	Directly Annotated GOID List
16491	oxidoreductase activity	42 out of 517 genes, 8.1%	265 out of 7288 background genes, 3.6%	0.00021	YAL061W:COR1:PRX1:ARA1:GRX1:YCP4:TSC13:SDH4:QCR7:RIP1:MXR1:SER3:PDA1:FET5:YGL039W:ERG25:RNR4:TRX2:PUT2:GRE3:EPS1:LYS12:LYS1:HYR1:QCR8:ECM17:MDH1:URA1:CCP1:COX8:NDI1:ADI1:COX7:IDH1:COX5A:LYS9:MPD2:MDH2:IDH2:YOR356W:ALD4:GDH1	4029:4152:4602:4354:8113:4449:3842:8137:47046:3756:16649:254:4754:4755:47066:4739:15035:45552:30508:4032:8177:4033:4322:8379:4129:16702:8121:4364:16616:4617:30060:16491:45290:9055:4748:4783:4130
3824	catalytic activity	187 out of 517 genes, 36.2%	1988 out of 7288 background genes, 27.3%	0.00114	FUN12:CDC19:YAL061W:RIB1:YBL036C:COR1:PRX1:ALG1:TPS1:ARA1:EHT1:PGI1:KTR4:ABD1:PRP5:SHM1:GRX1:PBN1:YCP4:RHB1:THR4:CPR4:TSC13:CDC7:CDC36:NUS1:HEM3:NTH1:CDC34:SDH4:HSP78:GLO2:DPL1:CPR5:SKP1:GPI17:KRE2:LPP1:QCR7:WBP1:RIP1:AFG1:PRB1:GPA2:MXR1:HOR2:MOT2:SER3:UBC6:SSA4:PDA1:SMC1:FET5:RPN11:UBP6:GSY1:SAP155:BNA6:PRE4:RPN12:SCL1:PNC1:YGL039W:RAD6:PYC1:CEG1:HOS2:SAP4:VMA7:ERG25:NAT2:RNR4:PCT1:TRX2:PFK1:PUP…	17040:4222:4152:51082:4514:19948:3713:3714:42623:4518:4372:42626:4373:4449:4805:217:4736:47066:4739:16757:32216:4596:50072:17050:43141:48:8379:4526:16616:4811:47938:150:31202:3729:19238:4743:4672:158:9:3872:4674:4748:3949:4026:4310:4029:4240:17136:739:4602:4175:4535:3735:3951:4754:4755:4682:3881:15035:45552:3883:4105:4032:8177:4033:17140:4322:4250:4252:16702:17076:45129:4617:30060:3743:16563:1649…
Component
GOID	GO_term	Cluster frequency	Background frequency	P-value	Gene(s) annotated to the term	Directly Annotated GOID List
44464	cell part	507 out of 517 genes, 98.1%	5495 out of 7288 background genes, 75.4%	3.16e-48	PRP45:FUN12:CDC19:CDC24:YAL061W:HAP3:RIB1:YBL036C:COR1:PSY4:PIN4:SHP1:SKT5:PRX1:AST1:ECM21:SFT2:YBR016W:CSG2:ATP3:HSP26:FES1:EXO84:VID24:CMD1:ALG1:TPS1:AGP2:ARA1:APD1:SSE2:EHT1:MED8:PGI1:KTR4:FTH1:AME1:NGR1:SDS24:YBP1:PCS60:MCX1:ABD1:PRP5:YBR241C:MRPS5:SRB6:RGD1:FMP51:SHM1:PAF1:MRPL27:ZSP1:BSD2:SGF29:RNQ1:GRX1:YCL045C:PBN1:KAR4:MRPL32:YCP4:RVS161:HSP30:RHB1:FEN2:SYP1:THR4:CPR4:NHP10:MED2:TSC13:CD…	5749:5678:19005:17119:932:5967:16602:46695:938:142:144:35267:798:145:502:506:5823:5750:5751:508:509:5681:5682:5829:5756:5758:5685:5759:5971:30479:221:43291:151:228:31206:1400:5830:159:5761:5834:5762:5763:5838:5768:30482:32806:300:8023:31932:30125:5622:19897:42645:30126:19898:307:5624:5625:5840:5770:5843:31431:5844:5845:9337:812:813:5847:5774:815:5777:5778:5779:817:45121:16272:30134:43529:30136:30…
5622	intracellular	484 out of 517 genes, 93.6%	5087 out of 7288 background genes, 69.8%	5.67e-41	PRP45:FUN12:CDC19:CDC24:YAL061W:HAP3:RIB1:YBL036C:COR1:PSY4:PIN4:SHP1:SKT5:PRX1:ECM21:SFT2:CSG2:ATP3:HSP26:FES1:EXO84:VID24:CMD1:ALG1:TPS1:AGP2:ARA1:APD1:SSE2:EHT1:MED8:PGI1:KTR4:FTH1:AME1:NGR1:SDS24:YBP1:PCS60:MCX1:ABD1:PRP5:YBR241C:MRPS5:SRB6:RGD1:FMP51:SHM1:PAF1:MRPL27:ZSP1:BSD2:SGF29:RNQ1:GRX1:YCL045C:PBN1:KAR4:MRPL32:YCP4:RVS161:THR4:NHP10:MED2:TSC13:CDC7:PEX19:BDF2:YET3:ASM4:BUG1:TMA17:YDL1…	5749:5678:19005:17119:932:5967:16602:46695:938:142:144:35267:798:145:502:506:5823:5750:5751:508:509:5681:5682:5756:5829:5758:5685:5759:5971:30479:221:43291:151:228:31206:5830:159:5761:5834:5762:5763:5838:5768:30482:32806:300:8023:31932:19897:30125:5622:42645:30126:19898:307:5624:5625:5840:5770:31431:5843:5844:5845:9337:812:813:5847:5774:815:5777:5778:5779:817:45121:16272:30134:43529:30136:30137:8…
44424	intracellular part	481 out of 517 genes, 93.0%	5052 out of 7288 background genes, 69.3%	8.52e-40	PRP45:FUN12:CDC19:CDC24:YAL061W:HAP3:RIB1:COR1:PSY4:PIN4:SHP1:SKT5:PRX1:ECM21:SFT2:CSG2:ATP3:HSP26:FES1:EXO84:VID24:CMD1:ALG1:TPS1:AGP2:ARA1:APD1:SSE2:EHT1:MED8:PGI1:KTR4:FTH1:AME1:NGR1:SDS24:YBP1:PCS60:MCX1:ABD1:PRP5:YBR241C:MRPS5:SRB6:RGD1:FMP51:SHM1:PAF1:MRPL27:ZSP1:BSD2:SGF29:RNQ1:GRX1:YCL045C:PBN1:KAR4:MRPL32:YCP4:RVS161:THR4:NHP10:MED2:TSC13:CDC7:PEX19:BDF2:YET3:ASM4:BUG1:TMA17:YDL121C:SNA4…	5749:5678:19005:17119:932:5967:16602:46695:938:142:144:35267:798:145:502:506:5823:5750:5751:508:509:5681:5682:5756:5829:5758:5685:5759:5971:30479:221:43291:151:228:31206:5830:159:5761:5834:5762:5763:5838:5768:30482:32806:300:8023:31932:19897:5622:30125:42645:30126:19898:307:5624:5625:5840:5770:31431:5843:5844:5845:9337:812:813:5847:5774:815:5777:5778:5779:817:45121:16272:30134:43529:30136:30137:8…
5737	cytoplasm	391 out of 517 genes, 75.6%	3694 out of 7288 background genes, 50.7%	6.37e-31	FUN12:CDC19:YAL061W:RIB1:COR1:PIN4:SHP1:SKT5:PRX1:ECM21:SFT2:CSG2:ATP3:HSP26:FES1:EXO84:VID24:CMD1:ALG1:TPS1:AGP2:ARA1:APD1:SSE2:EHT1:PGI1:KTR4:FTH1:AME1:NGR1:SDS24:YBP1:PCS60:MCX1:YBR241C:MRPS5:RGD1:FMP51:SHM1:MRPL27:ZSP1:BSD2:RNQ1:GRX1:YCL045C:PBN1:KAR4:MRPL32:YCP4:RVS161:THR4:TSC13:PEX19:YET3:BUG1:TMA17:YDL121C:SNA4:ENT1:CDC36:YDL173W:NUS1:HEM3:WHI4:NTH1:RCR2:PST2:CDC34:YDR056C:YDR063W:DOS2:SE…	5749:19005:17119:932:5967:46695:938:142:144:145:502:506:5823:5750:5751:5756:5829:5758:5759:5971:30479:221:43291:151:31206:5830:159:5761:5834:5762:5763:5838:5768:30482:300:31932:19897:30125:42645:30126:19898:5624:5625:5840:5770:5843:5844:9337:813:5774:815:5777:5778:5779:817:45121:16272:30134:43529:30136:30137:8250:5634:5635:5854:5782:5783:5784:31518:9277:48471:5789:16281:15629:17087:324:5643:12505…
43229	intracellular organelle	383 out of 517 genes, 74.1%	4021 out of 7288 background genes, 55.2%	1.02e-17	PRP45:FUN12:CDC24:YAL061W:HAP3:RIB1:COR1:PSY4:SHP1:SKT5:PRX1:SFT2:CSG2:ATP3:HSP26:FES1:VID24:CMD1:ALG1:AGP2:APD1:EHT1:MED8:PGI1:KTR4:FTH1:AME1:PCS60:MCX1:ABD1:PRP5:YBR241C:MRPS5:SRB6:RGD1:FMP51:SHM1:PAF1:MRPL27:ZSP1:BSD2:SGF29:GRX1:YCL045C:PBN1:KAR4:MRPL32:YCP4:RVS161:THR4:NHP10:MED2:TSC13:CDC7:BDF2:YET3:ASM4:TMA17:YDL121C:SNA4:ENT1:CDC36:NUS1:HEM3:RCR2:PST2:CDC34:YDR056C:YDR063W:SED1:SSS1:BMH2:S…	5749:5678:19005:932:17119:5967:16602:46695:938:142:144:35267:798:502:506:5823:5750:5751:508:509:5681:5682:5829:5756:5758:5685:5759:5971:30479:221:43291:151:228:31206:5830:159:5761:5834:5762:5763:5768:30482:32806:300:8023:31932:19897:30125:42645:30126:19898:5624:5625:5840:5770:31431:5843:5844:812:813:5847:5774:815:5777:5778:5779:817:45121:30134:43529:30136:30137:8250:5634:5635:8541:5854:5782:5783:…
43226	organelle	383 out of 517 genes, 74.1%	4022 out of 7288 background genes, 55.2%	1.08e-17	PRP45:FUN12:CDC24:YAL061W:HAP3:RIB1:COR1:PSY4:SHP1:SKT5:PRX1:SFT2:CSG2:ATP3:HSP26:FES1:VID24:CMD1:ALG1:AGP2:APD1:EHT1:MED8:PGI1:KTR4:FTH1:AME1:PCS60:MCX1:ABD1:PRP5:YBR241C:MRPS5:SRB6:RGD1:FMP51:SHM1:PAF1:MRPL27:ZSP1:BSD2:SGF29:GRX1:YCL045C:PBN1:KAR4:MRPL32:YCP4:RVS161:THR4:NHP10:MED2:TSC13:CDC7:BDF2:YET3:ASM4:TMA17:YDL121C:SNA4:ENT1:CDC36:NUS1:HEM3:RCR2:PST2:CDC34:YDR056C:YDR063W:SED1:SSS1:BMH2:S…	5749:5678:19005:932:17119:5967:16602:46695:938:142:144:35267:798:502:506:5823:5750:5751:508:509:5681:5682:5829:5756:5758:5685:5759:5971:30479:221:43291:151:228:31206:5830:159:5761:5834:5762:5763:5768:30482:32806:300:8023:31932:19897:30125:42645:30126:19898:5624:5625:5840:5770:31431:5843:5844:812:813:5847:5774:815:5777:5778:5779:817:45121:30134:43529:30136:30137:8250:5634:5635:8541:5854:5782:5783:…
43227	membrane-bound organelle	357 out of 517 genes, 69.1%	3674 out of 7288 background genes, 50.4%	1.45e-16	PRP45:FUN12:CDC24:YAL061W:HAP3:RIB1:COR1:PSY4:SHP1:PRX1:SFT2:CSG2:ATP3:HSP26:VID24:ALG1:AGP2:APD1:EHT1:MED8:PGI1:KTR4:FTH1:AME1:PCS60:MCX1:ABD1:PRP5:YBR241C:MRPS5:SRB6:FMP51:SHM1:PAF1:MRPL27:ZSP1:BSD2:SGF29:GRX1:YCL045C:PBN1:KAR4:MRPL32:YCP4:THR4:NHP10:MED2:TSC13:CDC7:BDF2:YET3:ASM4:TMA17:YDL121C:SNA4:CDC36:NUS1:HEM3:RCR2:PST2:CDC34:YDR056C:YDR063W:SED1:SSS1:BMH2:SDH4:MFB1:IVY1:HSP78:DPL1:CPR5:SK…	5749:5678:19005:932:17119:5967:16602:46695:938:35267:798:502:506:5823:5750:5751:508:509:5681:5682:5829:5756:5758:5685:5759:5971:30479:221:43291:151:228:31206:159:5761:5834:5762:5763:5768:32806:300:8023:31932:19897:30125:42645:30126:19898:5624:5625:5840:5770:31431:5843:5844:812:813:5847:5774:815:5777:5778:5779:817:30134:43529:30136:30137:8250:5634:5635:8541:5782:5783:5784:31518:9277:5789:31011:170…
43231	intracellular membrane-bound organelle	357 out of 517 genes, 69.1%	3674 out of 7288 background genes, 50.4%	1.45e-16	PRP45:FUN12:CDC24:YAL061W:HAP3:RIB1:COR1:PSY4:SHP1:PRX1:SFT2:CSG2:ATP3:HSP26:VID24:ALG1:AGP2:APD1:EHT1:MED8:PGI1:KTR4:FTH1:AME1:PCS60:MCX1:ABD1:PRP5:YBR241C:MRPS5:SRB6:FMP51:SHM1:PAF1:MRPL27:ZSP1:BSD2:SGF29:GRX1:YCL045C:PBN1:KAR4:MRPL32:YCP4:THR4:NHP10:MED2:TSC13:CDC7:BDF2:YET3:ASM4:TMA17:YDL121C:SNA4:CDC36:NUS1:HEM3:RCR2:PST2:CDC34:YDR056C:YDR063W:SED1:SSS1:BMH2:SDH4:MFB1:IVY1:HSP78:DPL1:CPR5:SK…	5749:5678:19005:932:17119:5967:16602:46695:938:35267:798:502:506:5823:5750:5751:508:509:5681:5682:5829:5756:5758:5685:5759:5971:30479:221:43291:151:228:31206:159:5761:5834:5762:5763:5768:32806:300:8023:31932:19897:30125:42645:30126:19898:5624:5625:5840:5770:31431:5843:5844:812:813:5847:5774:815:5777:5778:5779:817:30134:43529:30136:30137:8250:5634:5635:8541:5782:5783:5784:31518:9277:5789:31011:170…
44444	cytoplasmic part	265 out of 517 genes, 51.3%	2700 out of 7288 background genes, 37.0%	2.07e-09	FUN12:CDC19:COR1:SKT5:PRX1:SFT2:CSG2:ATP3:FES1:EXO84:VID24:CMD1:ALG1:TPS1:AGP2:ARA1:EHT1:PGI1:KTR4:FTH1:AME1:NGR1:PCS60:MCX1:YBR241C:MRPS5:RGD1:FMP51:SHM1:MRPL27:ZSP1:BSD2:RNQ1:YCL045C:PBN1:MRPL32:YCP4:RVS161:TSC13:PEX19:YET3:TMA17:YDL121C:SNA4:ENT1:NUS1:NTH1:RCR2:PST2:YDR056C:SED1:SSS1:SDH4:RAV2:MFB1:IVY1:BTT1:HSP78:DPL1:CPR5:SKP1:PEX3:GGA1:RVS167:GPI17:KRE2:VPS60:PSP1:QCR7:WBP1:GIM4:RIP1:AFG1:P…	5749:19005:17119:932:5967:938:142:144:145:506:5823:5750:5751:5756:5829:5758:5759:5971:30479:221:43291:151:31206:5830:159:5761:5834:5762:5763:5768:30482:300:31932:30125:42645:30126:19898:5624:5625:5840:5770:5843:5844:813:5774:815:5777:5778:5779:817:45121:16272:30134:43529:30136:30137:8250:5634:5635:5854:5782:5783:5784:31518:9277:48471:5789:16281:15629:17087:324:12505:328:31307:329:5933:5934:5935:5…
43234	protein complex	149 out of 517 genes, 28.8%	1291 out of 7288 background genes, 17.7%	2.45e-08	FUN12:HAP3:COR1:ATP3:EXO84:TPS1:MED8:AME1:NGR1:ABD1:MRPS5:SRB6:PAF1:MRPL27:SGF29:MRPL32:NHP10:MED2:CDC7:ASM4:RPN5:CDC36:CDC34:SSS1:SDH4:RAV2:MFB1:BTT1:SKP1:RPN9:GPI17:QCR7:WBP1:GIM4:RIP1:CHZ1:PCL6:MOT2:GET2:PDA1:SMC1:IES1:RPN11:UBP6:YMR31:PRE4:RPN12:RPN14:SCL1:TIF4632:RAD6:RSM23:NUP49:HOS2:COG1:RTG2:SWC4:VMA7:MRPL25:COG2:PTI1:MRPS35:RNR4:MVB12:NAS6:PFK1:PUP2:RTT102:GPA1:MAS2:MRPL6:CAP2:CKA1:ARC15…	5749:5678:19005:17119:932:5967:16602:46695:938:35267:798:145:502:506:5750:5751:508:509:5829:5756:5971:30479:221:43291:151:31206:5830:159:5834:5762:5763:5838:5768:32806:300:8023:31932:42645:307:5625:5840:31431:5843:5845:9337:812:813:5847:815:817:16272:43529:8250:5634:5635:8541:5854:5783:5784:31518:48471:5789:16281:31011:17087:5643:329:8623:5934:5935:5937:5794:19773:19774:118:119:16585:5654:5727:16…
32991	macromolecular complex	171 out of 517 genes, 33.1%	1626 out of 7288 background genes, 22.3%	1.17e-06	PRP45:FUN12:HAP3:COR1:ATP3:FES1:EXO84:TPS1:MED8:AME1:NGR1:ABD1:PRP5:MRPS5:SRB6:PAF1:MRPL27:SGF29:MRPL32:NHP10:MED2:CDC7:ASM4:TMA17:RPN5:CDC36:CDC34:SED1:SSS1:SDH4:RAV2:MFB1:BTT1:SKP1:CDC40:RPN9:GPI17:CWC21:QCR7:WBP1:GIM4:RIP1:SMB1:CHZ1:PCL6:MOT2:GET2:PDA1:SMC1:IES1:RPN11:UBP6:YMR31:PRE4:RPN12:RPN14:SCL1:TIF4632:RAD6:RSM23:NUP49:HOS2:COG1:RTG2:SWC4:VMA7:UPF3:PRP38:MRPL25:COG2:PTI1:MRPS35:PBP1:RNR4…	5749:5678:19005:17119:932:5967:16602:46695:938:35267:798:145:502:506:5750:5751:508:509:5681:5682:5829:5756:5685:5971:30479:221:43291:151:31206:5830:159:5761:5834:5762:5763:5838:5768:32806:300:8023:31932:42645:307:5625:5840:31431:5843:5844:5845:9337:812:813:5847:815:817:16272:43529:30137:8250:5634:5635:8541:5854:5783:5784:31518:9277:48471:5789:16281:31011:15629:17087:5643:329:8623:5934:5935:5937:5…
44429	mitochondrial part	63 out of 517 genes, 12.2%	443 out of 7288 background genes, 6.1%	1.54e-05	COR1:ATP3:EHT1:MCX1:MRPS5:MRPL27:MRPL32:SDH4:MFB1:HSP78:QCR7:RIP1:FMP52:PDA1:MDJ1:YMR31:RSM23:MRPL25:MRPS35:PHB2:MAS2:MRPL6:ERG9:ARC15:IML2:QCR8:STE24:NFU1:YNK1:MDH1:YJU3:MRPL31:MRP8:MRP49:CCP1:ISA1:COQ9:ATP14:COX8:RPM2:NDI1:MIC17:MRPS17:MRPL24:COX7:MRPL33:MRP7:IDH1:COX5A:POR1:ZIM17:ATP11:VPS21:IDH2:MRPL23:PET123:YOR285W:ALD4:ATP4:FUM1:MDL2:ATP15:PIS1	5749:932:5967:5750:5751:5829:5756:5758:5759:151:5761:5762:5763:42645:5770:5634:5783:17087:31307:5792:31315:274:5737:276:5739:5885:30678:5811:5740:5741:5743:30176
502	proteasome complex (sensu Eukaryota)	16 out of 517 genes, 3.1%	47 out of 7288 background genes, 0.6%	2.16e-05	RPN5:RPN9:RPN11:UBP6:PRE4:RPN12:RPN14:SCL1:RAD6:NAS6:PUP2:RPN13:PRE8:PRE6:PUP1:PRE10	502:5829:5838:5634:8541:19773:19774:5737:5739
31980	mitochondrial lumen	31 out of 517 genes, 6.0%	166 out of 7288 background genes, 2.3%	0.00016	MCX1:MRPS5:MRPL27:MRPL32:HSP78:PDA1:YMR31:RSM23:MRPL25:MRPS35:MAS2:MRPL6:NFU1:MDH1:MRPL31:MRP8:MRP49:ISA1:NDI1:MRPS17:MRPL24:MRPL33:MRP7:IDH1:ZIM17:ATP11:IDH2:MRPL23:PET123:ALD4:FUM1	5967:5829:5759:5761:5762:5763:42645:17087:5739
5759	mitochondrial matrix	31 out of 517 genes, 6.0%	166 out of 7288 background genes, 2.3%	0.00016	MCX1:MRPS5:MRPL27:MRPL32:HSP78:PDA1:YMR31:RSM23:MRPL25:MRPS35:MAS2:MRPL6:NFU1:MDH1:MRPL31:MRP8:MRP49:ISA1:NDI1:MRPS17:MRPL24:MRPL33:MRP7:IDH1:ZIM17:ATP11:IDH2:MRPL23:PET123:ALD4:FUM1	5967:5829:5759:5761:5762:5763:42645:17087:5739
5783	endoplasmic reticulum	50 out of 517 genes, 9.7%	344 out of 7288 background genes, 4.7%	0.00021	CSG2:ALG1:AGP2:ZSP1:BSD2:YCL045C:PBN1:TSC13:YET3:YDL121C:NUS1:YDR056C:SSS1:DPL1:CPR5:GPI17:WBP1:FMP52:ERG28:GET2:UBC6:ERJ5:YGL010W:YGL231C:UFD1:ERG25:VMA21:ERG9:EPS1:OST1:OPI3:STE24:YET1:GPT2:YLL023C:ORM2:CUE4:ERG5:SWP1:ROT1:NSG2:ALG9:ALG12:MPD2:LCB4:YOR285W:GPI2:YDC1:PIS1:NCE102	506:31206:5624:5625:5840:5774:43529:8250:5635:5783:5784:5789:329:5792:5794:5737:5739:5886:5887:5811:5741:16021:42765:30176
16020	membrane	115 out of 517 genes, 22.2%	1080 out of 7288 background genes, 14.8%	0.00064	COR1:AST1:SFT2:YBR016W:CSG2:ATP3:VID24:ALG1:AGP2:EHT1:FTH1:PCS60:YBR241C:BSD2:RVS161:HSP30:RHB1:FEN2:CPR4:TSC13:ASM4:SNA4:NUS1:RCR2:PST1:SSS1:SDH4:MFB1:IVY1:PEX3:FRQ1:GPI17:VPS60:LPP1:QCR7:WBP1:RIP1:FMP52:GPA2:ERG28:UBC6:GLO3:DDI1:HSP12:MDJ1:STE2:FET5:VPS45:PEX14:NUP49:VMA7:ERG25:VMA21:YGR106C:CLC1:PCT1:MVB12:PHB2:GPA1:ERP5:ERG9:EPS1:GVP36:SLM1:PRM5:OST1:SYS1:IML2:GWT1:QCR8:ATG27:PTK2:STE24:VPS24…	5749:5750:5751:5829:5756:30479:221:151:31206:5834:5768:31932:30125:19897:30126:19898:5624:5625:5840:5770:813:5774:815:5777:5778:5779:45121:5634:30137:8250:5635:5782:5783:5784:9277:46658:5789:324:5643:12505:31307:329:5937:5792:5793:5794:407:31315:42175:5801:5802:274:5737:276:5739:31902:5886:5887:136:5811:139:31982:16020:5741:16021:30173:5743:42765:16023:30176
31090	organelle membrane	73 out of 517 genes, 14.1%	619 out of 7288 background genes, 8.5%	0.00224	COR1:SFT2:CSG2:ATP3:AGP2:EHT1:FTH1:PCS60:YBR241C:BSD2:TSC13:ASM4:SNA4:SSS1:SDH4:MFB1:IVY1:PEX3:GPI17:VPS60:QCR7:WBP1:RIP1:FMP52:ERG28:UBC6:GLO3:MDJ1:FET5:VPS45:PEX14:NUP49:VMA7:ERG25:VMA21:YGR106C:CLC1:MVB12:PHB2:ERG9:EPS1:GVP36:OST1:SYS1:IML2:QCR8:STE24:VPS24:YET1:YJU3:AVT3:MEH1:COQ9:ATP14:PEX30:COX8:GTR1:SWP1:ROT1:GFD1:COX7:COX5A:POR1:PFA3:MAM3:VPS21:CEX1:TPO4:YOR285W:ATP4:MDL2:ATP15:PIS1	5749:5750:5751:5829:5756:221:151:31206:5768:30125:19898:30126:5840:5770:813:5774:815:5777:5778:5779:5634:30137:8250:5635:5782:5783:5784:5789:324:5643:31307:329:5792:5793:31315:5802:274:5737:276:5739:31902:5886:5887:5811:139:5741:30173:5743:42765:30176
44425	membrane part	71 out of 517 genes, 13.7%	614 out of 7288 background genes, 8.4%	0.00605	COR1:AST1:SFT2:CSG2:ATP3:VID24:ALG1:AGP2:EHT1:RVS161:RHB1:TSC13:ASM4:RCR2:SSS1:SDH4:MFB1:GPI17:QCR7:WBP1:RIP1:FMP52:ERG28:UBC6:GLO3:STE2:VPS45:NUP49:VMA7:ERG25:VMA21:CLC1:MVB12:GPA1:ERP5:ERG9:EPS1:GVP36:PRM5:OST1:SYS1:IML2:GWT1:QCR8:STE24:VPS24:DCW1:YET1:YJU3:URA1:ATP14:PEX30:VID22:COX8:PPZ1:YMR148W:SWP1:ROT1:GFD1:COX7:COX5A:POR1:ERP4:VPS21:CEX1:STE4:YOR285W:ATP4:ATP15:PIS1:NCE102	5749:5750:5751:5829:5756:30479:221:151:31206:5834:5768:30125:19897:30126:19898:5624:5840:5770:813:5774:815:5777:5779:45121:5634:30137:8250:5635:5783:5784:46658:5789:324:5643:31307:329:5937:5792:5793:31315:42175:5802:274:5737:276:5739:5886:5887:5811:139:16020:31982:5741:16021:30173:42765:16023:30176
5739	mitochondrion	112 out of 517 genes, 21.7%	1103 out of 7288 background genes, 15.1%	0.00873	FUN12:COR1:PRX1:ATP3:EHT1:PGI1:MCX1:MRPS5:FMP51:SHM1:MRPL27:MRPL32:YCP4:TSC13:PST2:SED1:SDH4:MFB1:HSP78:PSP1:QCR7:RIP1:AFG1:FMP52:GPA2:FMP29:PDA1:MDJ1:GSY1:YMR31:SCL1:FMP37:RSM23:SAP4:MRPL25:NAT2:MRPS35:PBP1:PHB2:YGR235C:PFK1:FMP43:FMP12:MAS2:PUT2:FYV4:MRPL6:ERG9:ARC15:LYS12:SLM1:IML2:QCR8:YJL171C:ATG27:MET3:OPI3:STE24:TFA1:NFU1:FBA1:YNK1:MDH1:YJU3:MRPL31:MRP8:MRP49:YKR023W:CCP1:ISA1:REX2:COQ9:AT…	5749:932:5967:5750:5751:5829:5756:5758:5759:151:5761:5762:5763:31932:42645:5840:5770:5843:5844:5634:5783:9277:5789:17087:324:31307:5792:5794:19773:407:31315:5945:5730:274:5737:276:5739:5885:5886:30678:5811:5740:16020:5741:16021:5743:5673:30176
Cluster 3
Genes
YML035C	AMD1	YML035C
YJR121W	ATP2	YJR121W
YER016W	BIM1	YER016W
YOR039W	CKB2	YOR039W
YNL298W	CLA4	YNL298W
YML113W	DAT1	YML113W
YER088C	DOT6	YER088C
YGL061C	DUO1	YGL061C
YML048W	GSF2	YML048W
YDL215C	GDH2	YDL215C
YJL044C	GYP6	YJL044C
YMR161W	HLJ1	YMR161W
YDR497C	ITR1	YDR497C
YPR159W	KRE6	YPR159W
YMR043W	MCM1	YMR043W
YNL328C	MDJ2	YNL328C
YHR058C	MED6	YHR058C
YKR006C	MRPL13	YKR006C
YGR014W	MSB2	YGR014W
YGR158C	MTR3	YGR158C
YER149C	PEA2	YER149C
YOL147C	PEX11	YOL147C
YGR132C	PHB1	YGR132C
YJL117W	PHO86	YJL117W
YER132C	PMD1	YER132C
YIL095W	PRK1	YIL095W
YFL036W	RPO41	YFL036W
YLR403W	SFP1	YLR403W
YGR074W	SMD1	YGR074W
YER148W	SPT15	YER148W
YAL019W	FUN30	YAL019W
YBR242W	non	YBR242W
YCR043C	non	YCR043C
YDL053C	PBP4	YDL053C
YDL213C	NOP6	YDL213C
YDR049W	non	YDR049W
YDR140W	MTQ2	YDR140W
YDR153C	ENT5	YDR153C
YDR266C	non	YDR266C
YDR528W	HLR1	YDR528W
YER002W	NOP16	YER002W
YER174C	GRX4	YER174C
YFL023W	BUD27	YFL023W
YFR048W	RMD8	YFR048W
YGR215W	RSM27	YGR215W
YJL192C	SOP4	YJL192C
YJR118C	ILM1	YJR118C
YKR038C	KAE1	YKR038C
YMR145C	NDE1	YMR145C
YNL155W	non	YNL155W
YNL191W	DUG3	YNL191W
YNL231C	PDR16	YNL231C
YNL232W	CSL4	YNL232W
YNL275W	BOR1	YNL275W
YOL129W	VPS68	YOL129W
YOR311C	HSD1	YOR311C
YOR322C	LDB19	YOR322C
YPL135W	ISU1	YPL135W
YPL221W	FLC1	YPL221W
GO Enrichments
Component
GOID	GO_term	Cluster frequency	Background frequency	P-value	Gene(s) annotated to the term	Directly Annotated GOID List
44464	cell part	59 out of 59 genes, 100.0%	5495 out of 7288 background genes, 75.4%	9.73e-06	FUN30:YBR242W:YCR043C:PBP4:NOP6:GDH2:YDR049W:MTQ2:ENT5:YDR266C:ITR1:HLR1:NOP16:BIM1:DOT6:PMD1:SPT15:PEA2:GRX4:BUD27:RPO41:RMD8:DUO1:MSB2:SMD1:PHB1:MTR3:RSM27:MED6:PRK1:GYP6:PHO86:SOP4:ILM1:ATP2:MRPL13:KAE1:SFP1:AMD1:GSF2:DAT1:MCM1:NDE1:HLJ1:YNL155W:DUG3:PDR16:CSL4:BOR1:CLA4:MDJ2:VPS68:PEX11:CKB2:HSD1:LDB19:ISU1:FLC1:KRE6	5783:5768:5876:5789:120:790:776:778:126:5622:30125:42645:5624:324:5730:5625:16592:329:5840:5737:5754:5682:5739:5935:5773:5669:5685:5759:5792:5881:5956:5778:5794:299:5886:30478:5887:30479:133:119:137:5811:30136:243:5634:42729:5741:408:16020:16021:5816:5743:1405:46540:176:177:5762:5819:30176:30427:5763
44424	intracellular part	57 out of 59 genes, 96.6%	5052 out of 7288 background genes, 69.3%	2.46e-05	FUN30:YBR242W:YCR043C:PBP4:NOP6:GDH2:YDR049W:MTQ2:ENT5:YDR266C:HLR1:NOP16:BIM1:DOT6:PMD1:SPT15:PEA2:GRX4:BUD27:RPO41:RMD8:DUO1:SMD1:PHB1:MTR3:RSM27:MED6:PRK1:GYP6:PHO86:SOP4:ILM1:ATP2:MRPL13:KAE1:SFP1:AMD1:GSF2:DAT1:MCM1:NDE1:HLJ1:YNL155W:DUG3:PDR16:CSL4:BOR1:CLA4:MDJ2:VPS68:PEX11:CKB2:HSD1:LDB19:ISU1:FLC1:KRE6	5783:5768:5876:5789:120:790:776:778:126:5622:30125:42645:5624:324:5625:5730:16592:329:5840:5737:5754:5682:5739:5935:5773:5685:5669:5759:5792:5881:5956:5778:5794:299:5886:30478:30479:133:119:137:5811:30136:243:42729:5634:5741:408:16021:5743:5816:1405:176:46540:177:5762:5819:30176:5763
5622	intracellular	57 out of 59 genes, 96.6%	5087 out of 7288 background genes, 69.8%	3.54e-05	FUN30:YBR242W:YCR043C:PBP4:NOP6:GDH2:YDR049W:MTQ2:ENT5:YDR266C:HLR1:NOP16:BIM1:DOT6:PMD1:SPT15:PEA2:GRX4:BUD27:RPO41:RMD8:DUO1:SMD1:PHB1:MTR3:RSM27:MED6:PRK1:GYP6:PHO86:SOP4:ILM1:ATP2:MRPL13:KAE1:SFP1:AMD1:GSF2:DAT1:MCM1:NDE1:HLJ1:YNL155W:DUG3:PDR16:CSL4:BOR1:CLA4:MDJ2:VPS68:PEX11:CKB2:HSD1:LDB19:ISU1:FLC1:KRE6	5783:5768:5876:5789:120:790:776:778:126:5622:30125:42645:5624:324:5625:5730:16592:329:5840:5737:5754:5682:5739:5935:5773:5685:5669:5759:5792:5881:5956:5778:5794:299:5886:30478:30479:133:119:137:5811:30136:243:42729:5634:5741:408:16021:5743:5816:1405:176:46540:177:5762:5819:30176:5763
5737	cytoplasm	48 out of 59 genes, 81.4%	3694 out of 7288 background genes, 50.7%	0.00017	FUN30:YBR242W:YCR043C:PBP4:GDH2:YDR049W:MTQ2:ENT5:YDR266C:HLR1:BIM1:DOT6:PMD1:PEA2:BUD27:RPO41:RMD8:DUO1:PHB1:MTR3:RSM27:PRK1:GYP6:PHO86:SOP4:ILM1:ATP2:MRPL13:KAE1:SFP1:AMD1:GSF2:NDE1:HLJ1:YNL155W:DUG3:PDR16:CSL4:BOR1:CLA4:MDJ2:VPS68:PEX11:HSD1:LDB19:ISU1:FLC1:KRE6	5783:5768:5876:5789:790:776:778:30125:42645:5624:324:5625:329:5840:5737:5754:5739:5935:5773:5759:5792:5881:5778:5794:299:5886:30478:30479:133:137:5811:30136:42729:5634:5741:408:16021:5743:5816:1405:176:177:5762:5819:30176:5763
43229	intracellular organelle	49 out of 59 genes, 83.1%	4021 out of 7288 background genes, 55.2%	0.001	FUN30:YBR242W:YCR043C:PBP4:NOP6:GDH2:YDR049W:MTQ2:ENT5:YDR266C:NOP16:BIM1:DOT6:SPT15:PEA2:GRX4:RPO41:DUO1:SMD1:PHB1:MTR3:RSM27:MED6:PRK1:GYP6:PHO86:SOP4:ILM1:ATP2:MRPL13:KAE1:SFP1:GSF2:DAT1:MCM1:NDE1:HLJ1:YNL155W:CSL4:BOR1:CLA4:MDJ2:VPS68:PEX11:HSD1:LDB19:ISU1:FLC1:KRE6	5783:5768:5876:5789:120:790:776:778:126:5622:30125:42645:5624:324:5625:5730:16592:329:5840:5737:5754:5682:5739:5935:5773:5685:5669:5759:5881:5778:5794:299:5886:30478:30479:133:119:137:30136:243:42729:5634:5741:408:16021:5743:5816:1405:176:46540:177:5762:5819:30176:5763
43226	organelle	49 out of 59 genes, 83.1%	4022 out of 7288 background genes, 55.2%	0.00101	FUN30:YBR242W:YCR043C:PBP4:NOP6:GDH2:YDR049W:MTQ2:ENT5:YDR266C:NOP16:BIM1:DOT6:SPT15:PEA2:GRX4:RPO41:DUO1:SMD1:PHB1:MTR3:RSM27:MED6:PRK1:GYP6:PHO86:SOP4:ILM1:ATP2:MRPL13:KAE1:SFP1:GSF2:DAT1:MCM1:NDE1:HLJ1:YNL155W:CSL4:BOR1:CLA4:MDJ2:VPS68:PEX11:HSD1:LDB19:ISU1:FLC1:KRE6	5783:5768:5876:5789:120:790:776:778:126:5622:30125:42645:5624:324:5625:5730:16592:329:5840:5737:5754:5682:5739:5935:5773:5685:5669:5759:5881:5778:5794:299:5886:30478:30479:133:119:137:30136:243:42729:5634:5741:408:16021:5743:5816:1405:176:46540:177:5762:5819:30176:5763
Cluster 4
Genes
YGR037C	ACB1	YGR037C
YOR002W	ALG6	YOR002W
YOR198C	BFR1	YOR198C
YIL043C	CBR1	YIL043C
YER168C	CCA1	YER168C
YPR025C	CCL1	YPR025C
YDR301W	CFT1	YDR301W
YOL145C	CTR9	YOL145C
YDR385W	EFT2	YDR385W
YMR319C	FET4	YMR319C
YGR267C	FOL2	YGR267C
YDL207W	GLE1	YDL207W
YOL103W	ITR2	YOL103W
YGR244C	LSC2	YGR244C
YGL055W	OLE1	YGL055W
YML069W	POB3	YML069W
YHR026W	PPA1	YHR026W
YNR032W	PPG1	YNR032W
YGR135W	PRE9	YGR135W
YBL056W	PTC3	YBL056W
YOR261C	RPN8	YOR261C
YOR259C	RPT4	YOR259C
YPL083C	SEN54	YPL083C
YDR515W	SLF1	YDR515W
YKL122C	SRP21	YKL122C
YIL143C	SSL2	YIL143C
YAL016W	TPD3	YAL016W
YOR124C	UBP2	YOR124C
YKL024C	URA6	YKL024C
YPR036W	VMA13	YPR036W
YBR127C	VMA2	YBR127C
YCR060W	TAH1	YCR060W
YDR400W	URH1	YDR400W
YDR531W	non	YDR531W
YFR044C	DUG1	YFR044C
YGL001C	ERG26	YGL001C
YGL020C	GET1	YGL020C
YGL110C	CUE3	YGL110C
YHR083W	SAM35	YHR083W
YHR111W	UBA4	YHR111W
YIL124W	AYR1	YIL124W
YIR010W	DSN1	YIR010W
YKL077W	non	YKL077W
YMR113W	FOL3	YMR113W
YNR027W	BUD17	YNR027W
YOL031C	SIL1	YOL031C
YOR253W	NAT5	YOR253W
GO Enrichments
Process
GOID	GO_term	Cluster frequency	Background frequency	P-value	Gene(s) annotated to the term	Directly Annotated GOID List
9987	cellular process	44 out of 47 genes, 93.6%	4701 out of 7288 background genes, 64.5%	0.00122	TPD3:PTC3:VMA2:TAH1:GLE1:CFT1:EFT2:URH1:SLF1:YDR531W:CCA1:DUG1:ERG26:GET1:OLE1:ACB1:PRE9:LSC2:FOL2:PPA1:SAM35:UBA4:CBR1:AYR1:SSL2:DSN1:URA6:SRP21:POB3:FOL3:FET4:BUD17:PPG1:SIL1:CTR9:ALG6:UBP2:BFR1:NAT5:RPT4:RPN8:SEN54:CCL1:VMA13	717:8655:6696:6874:6400:79:6118:6878:6986:6333:6511:6261:16571:6338:16579:40:30433:6378:6379:6486:16973:6488:16071:5977:9396:7035:6412:7070:6414:1:6417:42493:6631:15677:1403:6099:6457:6636:6388:30447:7005:45040:6890:7114:6207:7117:45047:6139:46135:15680:15937:7088:6464:6289:6751:6104:7015:7124:7126:6979:15909:7059:6616:173:6470:7094:6366:6617:6367:6368:6474:6369:282:6654
Function
GOID	GO_term	Cluster frequency	Background frequency	P-value	Gene(s) annotated to the term	Directly Annotated GOID List
3824	catalytic activity	26 out of 47 genes, 55.3%	1988 out of 7288 background genes, 27.3%	0.00567	TPD3:PTC3:VMA2:URH1:YDR531W:CCA1:DUG1:ERG26:OLE1:PRE9:LSC2:FOL2:PPA1:UBA4:CBR1:AYR1:SSL2:URA6:FOL3:PPG1:ALG6:UBP2:NAT5:RPT4:SEN54:VMA13	16887:16251:4128:50263:8841:46961:4175:42292:213:140:4810:8769:252:3934:4843:158:3678:4594:16758:4596:4775:4849:4768:15071
46961	hydrogen ion transporting ATPase activity, rotational mechanism	3 out of 47 genes, 6.4%	13 out of 7288 background genes, 0.2%	0.00886	VMA2:PPA1:VMA13	46961
Component
GOID	GO_term	Cluster frequency	Background frequency	P-value	Gene(s) annotated to the term	Directly Annotated GOID List
44464	cell part	47 out of 47 genes, 100.0%	5495 out of 7288 background genes, 75.4%	0.00023	TPD3:PTC3:VMA2:TAH1:GLE1:CFT1:EFT2:URH1:SLF1:YDR531W:CCA1:DUG1:ERG26:GET1:OLE1:CUE3:ACB1:PRE9:LSC2:FOL2:PPA1:SAM35:UBA4:CBR1:AYR1:SSL2:DSN1:URA6:YKL077W:SRP21:POB3:FOL3:FET4:BUD17:PPG1:SIL1:ITR2:CTR9:ALG6:UBP2:BFR1:NAT5:RPT4:RPN8:SEN54:CCL1:VMA13	5783:5786:5789:43332:42175:790:8023:776:214:19898:324:5643:16593:329:5840:5737:31415:35101:5739:5844:5934:5935:5847:5759:30529:5849:5792:922:19773:818:5886:5887:112:220:221:43529:5811:5634:1401:5830:16020:5741:5637:16021:5816:159:8540:8541:5658:5675
44424	intracellular part	45 out of 47 genes, 95.7%	5052 out of 7288 background genes, 69.3%	0.00104	TPD3:PTC3:VMA2:TAH1:GLE1:CFT1:EFT2:URH1:SLF1:YDR531W:CCA1:DUG1:ERG26:GET1:OLE1:CUE3:ACB1:PRE9:LSC2:FOL2:PPA1:SAM35:UBA4:CBR1:AYR1:SSL2:DSN1:URA6:YKL077W:SRP21:POB3:FOL3:BUD17:PPG1:SIL1:CTR9:ALG6:UBP2:BFR1:NAT5:RPT4:RPN8:SEN54:CCL1:VMA13	5783:5786:5789:43332:42175:790:8023:776:214:19898:324:5643:16593:329:5840:5737:31415:35101:5844:5739:5934:5935:5847:5759:30529:5792:5849:922:818:19773:112:220:221:43529:5811:5634:1401:5830:5741:5637:16021:159:5816:8540:8541:5658:5675
5622	intracellular	45 out of 47 genes, 95.7%	5087 out of 7288 background genes, 69.8%	0.00138	TPD3:PTC3:VMA2:TAH1:GLE1:CFT1:EFT2:URH1:SLF1:YDR531W:CCA1:DUG1:ERG26:GET1:OLE1:CUE3:ACB1:PRE9:LSC2:FOL2:PPA1:SAM35:UBA4:CBR1:AYR1:SSL2:DSN1:URA6:YKL077W:SRP21:POB3:FOL3:BUD17:PPG1:SIL1:CTR9:ALG6:UBP2:BFR1:NAT5:RPT4:RPN8:SEN54:CCL1:VMA13	5783:5786:5789:43332:42175:790:8023:776:214:19898:324:5643:16593:329:5840:5737:31415:35101:5844:5739:5934:5935:5847:5759:30529:5792:5849:922:818:19773:112:220:221:43529:5811:5634:1401:5830:5741:5637:16021:159:5816:8540:8541:5658:5675
32991	macromolecular complex	23 out of 47 genes, 48.9%	1626 out of 7288 background genes, 22.3%	0.00724	TPD3:VMA2:GLE1:CFT1:EFT2:SLF1:DUG1:GET1:PRE9:PPA1:SAM35:SSL2:DSN1:SRP21:POB3:CTR9:BFR1:NAT5:RPT4:RPN8:SEN54:CCL1:VMA13	5783:5786:43332:42175:790:8023:776:214:19898:5643:16593:329:5840:5737:31415:35101:5844:5739:5934:5935:5847:30529:5849:922:818:19773:112:220:221:43529:5634:1401:5830:5741:5637:16021:159:5816:8540:8541:5658:5675
5737	cytoplasm	37 out of 47 genes, 78.7%	3694 out of 7288 background genes, 50.7%	0.0097	TPD3:PTC3:VMA2:TAH1:GLE1:CFT1:EFT2:URH1:SLF1:YDR531W:CCA1:DUG1:ERG26:GET1:OLE1:CUE3:ACB1:LSC2:FOL2:PPA1:SAM35:UBA4:CBR1:AYR1:URA6:YKL077W:SRP21:FOL3:BUD17:PPG1:SIL1:ALG6:UBP2:NAT5:SEN54:CCL1:VMA13	5783:5786:5789:43332:214:19898:324:5643:329:5840:5737:31415:5844:5739:5934:5935:5847:5759:5792:5849:220:221:43529:5811:5634:1401:5830:5741:5637:16021:159:5816:5675
Cluster 5
Genes
YGR204W	ADE3	YGR204W
YGL019W	CKB1	YGL019W
YAL039C	CYC3	YAL039C
YAL012W	CYS3	YAL012W
YLR348C	DIC1	YLR348C
YHR007C	ERG11	YHR007C
YER136W	GDI1	YER136W
YKR084C	HBS1	YKR084C
YOR176W	HEM15	YOR176W
YGL253W	HXK2	YGL253W
YNL071W	LAT1	YNL071W
YDL078C	MDH3	YDL078C
YOR209C	NPT1	YOR209C
YDL116W	NUP84	YDL116W
YDR481C	PHO8	YDR481C
YMR314W	PRE5	YMR314W
YDR484W	VPS52	YDR484W
YLR292C	SEC72	YLR292C
YKL210W	UBA1	YKL210W
YBR025C	non	YBR025C
YBR052C	RFS1	YBR052C
YDR084C	TVP23	YDR084C
YDR100W	TVP15	YDR100W
YEL047C	non	YEL047C
YDL120W	YFH1	YDL120W
YGL157W	non	YGL157W
YGR163W	GTR2	YGR163W
YGR266W	non	YGR266W
YJR015W	non	YJR015W
YKL195W	MIA40	YKL195W
YKR074W	non	YKR074W
YKR088C	TVP38	YKR088C
YMR192W	GYL1	YMR192W
YMR315W	non	YMR315W
YNL177C	MRPL22	YNL177C
YOR164C	non	YOR164C
YOR197W	MCA1	YOR197W
YKL126W	YPK1	YKL126W
GO Enrichments
Component
GOID	GO_term	Cluster frequency	Background frequency	P-value	Gene(s) annotated to the term	Directly Annotated GOID List
44424	intracellular part	37 out of 38 genes, 97.4%	5052 out of 7288 background genes, 69.3%	0.00174	CYS3:CYC3:YBR025C:RFS1:MDH3:NUP84:YFH1:TVP23:TVP15:PHO8:VPS52:YEL047C:CKB1:YGL157W:HXK2:GTR2:ADE3:YGR266W:ERG11:YJR015W:YPK1:MIA40:UBA1:YKR074W:HBS1:TVP38:SEC72:DIC1:GYL1:PRE5:YMR315W:LAT1:MRPL22:YOR164C:HEM15:MCA1:NPT1	5782:5783:5967:5789:938:5643:329:5840:5737:5933:5739:5934:5829:5935:5758:5774:5759:5777:5794:5956:31902:19773:5886:5798:131:5634:30137:31207:5740:5741:5742:30173:5743:5762
5737	cytoplasm	32 out of 38 genes, 84.2%	3694 out of 7288 background genes, 50.7%	0.00188	CYS3:CYC3:YBR025C:RFS1:MDH3:YFH1:TVP23:TVP15:PHO8:VPS52:YEL047C:YGL157W:HXK2:GTR2:ADE3:YGR266W:ERG11:YJR015W:YPK1:MIA40:UBA1:YKR074W:HBS1:TVP38:SEC72:DIC1:GYL1:YMR315W:LAT1:MRPL22:YOR164C:HEM15	5782:5783:5967:5789:938:5840:329:5737:5933:5739:5934:5829:5935:5774:5758:5759:5777:5794:31902:5886:5798:131:5634:30137:5740:31207:5741:5742:5743:30173:5762
5622	intracellular	37 out of 38 genes, 97.4%	5087 out of 7288 background genes, 69.8%	0.00221	CYS3:CYC3:YBR025C:RFS1:MDH3:NUP84:YFH1:TVP23:TVP15:PHO8:VPS52:YEL047C:CKB1:YGL157W:HXK2:GTR2:ADE3:YGR266W:ERG11:YJR015W:YPK1:MIA40:UBA1:YKR074W:HBS1:TVP38:SEC72:DIC1:GYL1:PRE5:YMR315W:LAT1:MRPL22:YOR164C:HEM15:MCA1:NPT1	5782:5783:5967:5789:938:5643:5840:329:5737:5933:5739:5934:5829:5935:5774:5758:5759:5777:5956:5794:19773:31902:5886:5798:131:5634:30137:5740:31207:5741:5742:5743:30173:5762
44464	cell part	38 out of 38 genes, 100.0%	5495 out of 7288 background genes, 75.4%	0.00239	CYS3:CYC3:YBR025C:RFS1:MDH3:NUP84:YFH1:TVP23:TVP15:PHO8:VPS52:YEL047C:GDI1:CKB1:YGL157W:HXK2:GTR2:ADE3:YGR266W:ERG11:YJR015W:YPK1:MIA40:UBA1:YKR074W:HBS1:TVP38:SEC72:DIC1:GYL1:PRE5:YMR315W:LAT1:MRPL22:YOR164C:HEM15:MCA1:NPT1	5782:5783:5967:5789:938:5624:5625:5643:5840:329:5737:5933:5739:5934:5829:5935:5774:5758:5759:5777:5956:5794:19773:31902:5886:5798:131:5634:30137:5740:31207:5741:5742:5743:30173:5762
30173	integral to Golgi membrane	3 out of 38 genes, 7.9%	15 out of 7288 background genes, 0.2%	0.00644	TVP23:TVP15:TVP38	5737:30137:30173
31228	intrinsic to Golgi membrane	3 out of 38 genes, 7.9%	15 out of 7288 background genes, 0.2%	0.00644	TVP23:TVP15:TVP38	5737:30137:30173
Cluster 6
Genes
YBR288C	APM3	YBR288C
YAL021C	CCR4	YAL021C
YER164W	CHD1	YER164W
YPL049C	DIG1	YPL049C
YML009C	MRPL39	YML009C
YOR167C	RPS28A	YOR167C
YNL272C	SEC2	YNL272C
YLR378C	SEC61	YLR378C
YCR067C	SED4	YCR067C
YBL007C	SLA1	YBL007C
YDR477W	SNF1	YDR477W
YGL115W	SNF4	YGL115W
YAL005C	SSA1	YAL005C
YOL115W	PAP2	YOL115W
YDL046W	NPC2	YDL046W
YDR116C	MRPL1	YDR116C
YDR476C	non	YDR476C
YIL104C	SHQ1	YIL104C
YKL206C	ADD66	YKL206C
YLL038C	ENT4	YLL038C
YLR369W	SSQ1	YLR369W
YNL212W	VID27	YNL212W
YOR179C	SYC1	YOR179C
GO Enrichments
Function
GOID	GO_term	Cluster frequency	Background frequency	P-value	Gene(s) annotated to the term	Directly Annotated GOID List
4679	AMP-activated protein kinase activity	2 out of 23 genes, 8.7%	5 out of 7288 background genes, 0.1%	0.00511	SNF1:SNF4	43539:4679
Component
GOID	GO_term	Cluster frequency	Background frequency	P-value	Gene(s) annotated to the term	Directly Annotated GOID List
31974	membrane-enclosed lumen	11 out of 23 genes, 47.8%	818 out of 7288 background genes, 11.2%	0.00138	CCR4:NPC2:MRPL1:SNF1:CHD1:SNF4:SHQ1:SSQ1:SEC61:MRPL39:SYC1	5847:5759:5784:5788:5886:8023:46695:30015:124:31588:324:5641:31206:5634:328:16593:5654:5737:5762:30176:5739
43233	organelle lumen	11 out of 23 genes, 47.8%	818 out of 7288 background genes, 11.2%	0.00138	CCR4:NPC2:MRPL1:SNF1:CHD1:SNF4:SHQ1:SSQ1:SEC61:MRPL39:SYC1	5847:5759:5784:5788:5886:8023:46695:30015:124:31588:5641:324:31206:5634:328:16593:5654:5737:5762:30176:5739
44422	organelle part	17 out of 23 genes, 73.9%	2270 out of 7288 background genes, 31.1%	0.00328	SSA1:CCR4:SLA1:SED4:NPC2:MRPL1:SNF1:CHD1:SNF4:SHQ1:ENT4:SSQ1:SEC61:MRPL39:PAP2:RPS28A:SYC1	5847:5759:5783:5784:9277:5788:5886:30479:8023:46695:30015:124:31499:31588:5641:324:31206:5634:328:16593:5654:329:5832:5737:5843:5762:5739:30176
44446	intracellular organelle part	17 out of 23 genes, 73.9%	2270 out of 7288 background genes, 31.1%	0.00328	SSA1:CCR4:SLA1:SED4:NPC2:MRPL1:SNF1:CHD1:SNF4:SHQ1:ENT4:SSQ1:SEC61:MRPL39:PAP2:RPS28A:SYC1	5847:5759:5783:5784:9277:5788:5886:30479:8023:46695:30015:124:31499:31588:5641:324:31206:5634:328:16593:5654:329:5832:5737:5843:5762:5739:30176
5641	nuclear envelope lumen	2 out of 23 genes, 8.7%	4 out of 7288 background genes, 0.1%	0.00626	SNF1:SNF4	5886:31588:324:5641:5634:5737:5739
Cluster 7
Genes
YCR094W	CDC50	YCR094W
YBR003W	COQ1	YBR003W
YML126C	ERG13	YML126C
YJR139C	HOM6	YJR139C
YCR071C	IMG2	YCR071C
YMR205C	PFK2	YMR205C
YCL057W	PRD1	YCL057W
YIL075C	RPN2	YIL075C
YGL233W	SEC15	YGL233W
YBR130C	SHE3	YBR130C
YBR123C	TFC1	YBR123C
YAL060W	BDH1	YAL060W
YDR036C	EHD3	YDR036C
YGL084C	GUP1	YGL084C
YMR178W	non	YMR178W
YNL245C	CWC25	YNL245C
NO Enrichments

## Sheet: Sheet2
Bi - Clusters
Bi-cluster 1	Score 287			Mean pattern, and conditions
YEL052W	AFG1	YEL052W
YIL062C	ARC15	YIL062C
YBR211C	AME1	YBR211C
YOR377W	ATF1	YOR377W
YNR007C	ATG3	YNR007C
YBR290W	BSD2	YBR290W
YER159C	BUR6	YER159C
YML102W	CAC2	YML102W
YKL049C	CSE4	YKL049C
YML113W	DAT1	YML113W
YPL049C	DIG1	YPL049C
YER020W	GPA2	YER020W
YBL021C	HAP3	YBL021C
YGL194C	HOS2	YGL194C
YCR021C	HSP30	YCR021C
YJL146W	IDS2	YJL146W
YBR199W	KTR4	YBR199W
YDR503C	LPP1	YDR503C
YPL270W	MDL2	YPL270W
YBR193C	MED8	YBR193C
YNL103W	MET4	YNL103W
YOR274W	MOD5	YOR274W
YMR286W	MRPL33	YMR286W
YBR268W	MRPL37	YBR268W
YGR014W	MSB2	YGR014W
YGR147C	NAT2	YGR147C
YLR457C	NBP1	YLR457C
YBR212W	NGR1	YBR212W
YPL124W	SPC29	YPL124W
YJR112W	NNF1	YJR112W
YCL052C	PBN1	YCL052C
YER059W	PCL6	YER059W
YDR329C	PEX3	YDR329C
YBR237W	PRP5	YBR237W
YBL033C	RIB1	YBL033C
YIL153W	RRD1	YIL153W
YBR070C	ALG14	YBR070C
YBL102W	SFT2	YBL102W
YPR182W	SMX3	YPR182W
YNR034W	SOL1	YNR034W
YBR253W	SRB6	YBR253W
YDR169C	STB3	YDR169C
YDR410C	STE14	YDR410C
YOR212W	STE4	YOR212W
YJL004C	SYS1	YJL004C
YMR236W	TAF9	YMR236W
YDR167W	TAF10	YDR167W
YOR244W	ESA1	YOR244W
YKL058W	TOA2	YKL058W
YDL224C	WHI4	YDL224C
YAL033W	POP5	YAL033W
YBR016W	non	YBR016W
YBR214W	SDS24	YBR214W
YBR241C	non	YBR241C
YBR262C	FMP51	YBR262C
YCL010C	SGF29	YCL010C
YCR027C	RHB1	YCR027C
YCR060W	TAH1	YCR060W
YDL123W	SNA4	YDL123W
YDR003W	RCR2	YDR003W
YDR061W	non	YDR061W
YDR202C	RAV2	YDR202C
YDR219C	MFB1	YDR219C
YDR229W	IVY1	YDR229W
YDR358W	GGA1	YDR358W
YDR458C	HEH2	YDR458C
YDR476C	non	YDR476C
YDR482C	CWC21	YDR482C
YER018C	SPC25	YER018C
YER034W	non	YER034W
YER035W	EDC2	YER035W
YER067W	non	YER067W
YER083C	GET2	YER083C
YER128W	non	YER128W
YDL120W	YFH1	YDL120W
YGL010W	non	YGL010W
YGL056C	SDS23	YGL056C
YGL174W	BUD13	YGL174W
YGR002C	SWC4	YGR002C
YGR031W	non	YGR031W
YGR136W	LSB1	YGR136W
YGR156W	PTI1	YGR156W
YGR205W	non	YGR205W
YGR243W	FMP43	YGR243W
YHL008C	non	YHL008C
YHR083W	SAM35	YHR083W
YHR192W	non	YHR192W
YIL117C	PRM5	YIL117C
YIL135C	VHS2	YIL135C
YIL161W	non	YIL161W
YIR003W	non	YIR003W
YIR010W	DSN1	YIR010W
YJL065C	DLS1	YJL065C
YJR083C	ACF4	YJR083C
YKL023W	non	YKL023W
YKL061W	non	YKL061W
YKL146W	AVT3	YKL146W
YKL206C	ADD66	YKL206C
YKR007W	MEH1	YKR007W
YKR045C	non	YKR045C
YKR100C	SKG1	YKR100C
YLL027W	ISA1	YLL027W
YLL038C	ENT4	YLL038C
YLR219W	MSC3	YLR219W
YLR324W	PEX30	YLR324W
YLR350W	ORM2	YLR350W
YML020W	non	YML020W
YML101C	CUE4	YML101C
YMR112C	MED11	YMR112C
YMR255W	GFD1	YMR255W
YFR049W	YMR31	YFR049W
YNL078W	NIS1	YNL078W
YNL091W	NST1	YNL091W
YNL100W	non	YNL100W
YNL157W	IGO1	YNL157W
YNL158W	PGA1	YNL158W
YNL245C	CWC25	YNL245C
YNL275W	BOR1	YNL275W
YNL326C	PFA3	YNL326C
YNR014W	non	YNR014W
YNR027W	BUD17	YNR027W
YOR104W	PIN2	YOR104W
YOR179C	SYC1	YOR179C
YOR189W	IES4	YOR189W
YOR220W	WSP1	YOR220W
YOR322C	LDB19	YOR322C
YPL014W	non	YPL014W
YPL047W	SGF11	YPL047W
YPL181W	CTI6	YPL181W
GO Enrichments
Component
GOID	GO_term	Cluster frequency	Background frequency	P-value	Gene(s) annotated to the term	Directly Annotated GOID List
44464	cell part	123 out of 129 genes, 95.3%	5495 out of 7288 background genes, 75.4%	1.85e-07	POP5:HAP3:RIB1:SFT2:YBR016W:ALG14:MED8:KTR4:AME1:NGR1:SDS24:PRP5:YBR241C:SRB6:FMP51:MRPL37:BSD2:SGF29:PBN1:HSP30:RHB1:TAH1:YFH1:SNA4:WHI4:RCR2:YDR061W:TAF10:STB3:RAV2:MFB1:IVY1:PEX3:GGA1:STE14:YDR476C:CWC21:LPP1:AFG1:SPC25:GPA2:YER034W:EDC2:PCL6:YER067W:GET2:BUR6:YMR31:YGL010W:SDS23:BUD13:HOS2:SWC4:MSB2:YGR031W:LSB1:NAT2:PTI1:YGR205W:FMP43:YHL008C:SAM35:YHR192W:ARC15:PRM5:VHS2:RRD1:YIL161W:YIR003…	5678:5783:932:48471:5789:16602:46695:15629:35267:324:5643:12505:5823:329:508:5681:5682:5933:5829:5934:8623:5935:5685:5937:5759:5794:30479:43541:118:43291:151:119:1401:5727:31315:5655:5834:267:5762:5763:5768:42175:775:776:123:124:778:19897:19898:5624:5802:307:5730:16592:32777:5840:5737:5739:5773:812:5669:5847:5777:5778:922:5779:817:31902:5885:818:5886:780:5887:131:788:43529:5811:30136:5634:139:563…
44424	intracellular part	116 out of 129 genes, 89.9%	5052 out of 7288 background genes, 69.3%	3.57e-06	POP5:HAP3:RIB1:SFT2:ALG14:MED8:KTR4:AME1:NGR1:SDS24:PRP5:YBR241C:SRB6:FMP51:MRPL37:BSD2:SGF29:PBN1:TAH1:YFH1:SNA4:WHI4:RCR2:YDR061W:TAF10:STB3:RAV2:MFB1:IVY1:PEX3:GGA1:STE14:YDR476C:CWC21:AFG1:SPC25:GPA2:YER034W:EDC2:PCL6:YER067W:GET2:BUR6:YMR31:YGL010W:SDS23:BUD13:HOS2:SWC4:YGR031W:LSB1:NAT2:PTI1:YGR205W:FMP43:YHL008C:SAM35:YHR192W:ARC15:VHS2:RRD1:YIL161W:YIR003W:DSN1:SYS1:DLS1:IDS2:NNF1:YKL023W…	5678:5783:932:48471:5789:16602:46695:15629:35267:324:5643:12505:5823:329:508:5681:5682:5933:5829:5934:8623:5935:5685:5759:5794:30479:43541:118:43291:151:119:1401:5727:31315:5655:267:5762:5763:5768:42175:775:123:776:124:778:19898:307:5802:5624:5730:16592:32777:5840:5737:5739:5773:812:5847:5669:5777:922:5778:5779:817:31902:818:5885:5886:780:131:788:43529:5811:30136:139:5634:5635:5740:172:5741:31982…
5622	intracellular	116 out of 129 genes, 89.9%	5087 out of 7288 background genes, 69.8%	6.59e-06	POP5:HAP3:RIB1:SFT2:ALG14:MED8:KTR4:AME1:NGR1:SDS24:PRP5:YBR241C:SRB6:FMP51:MRPL37:BSD2:SGF29:PBN1:TAH1:YFH1:SNA4:WHI4:RCR2:YDR061W:TAF10:STB3:RAV2:MFB1:IVY1:PEX3:GGA1:STE14:YDR476C:CWC21:AFG1:SPC25:GPA2:YER034W:EDC2:PCL6:YER067W:GET2:BUR6:YMR31:YGL010W:SDS23:BUD13:HOS2:SWC4:YGR031W:LSB1:NAT2:PTI1:YGR205W:FMP43:YHL008C:SAM35:YHR192W:ARC15:VHS2:RRD1:YIL161W:YIR003W:DSN1:SYS1:DLS1:IDS2:NNF1:YKL023W…	5678:5783:932:48471:5789:16602:46695:15629:35267:324:5643:12505:5823:329:508:5681:5682:5933:5829:5934:8623:5935:5685:5759:5794:30479:43541:118:43291:151:119:1401:5727:31315:5655:267:5762:5763:5768:42175:775:123:776:124:778:19898:307:5802:5624:5730:16592:32777:5840:5737:5739:5773:812:5847:5669:5777:922:5778:5779:817:31902:818:5885:5886:780:131:788:43529:5811:30136:139:5634:5635:5740:172:5741:31982…
43227	membrane-bound organelle	95 out of 129 genes, 73.6%	3674 out of 7288 background genes, 50.4%	9.28e-06	POP5:HAP3:RIB1:SFT2:ALG14:MED8:KTR4:AME1:PRP5:YBR241C:SRB6:FMP51:MRPL37:BSD2:SGF29:PBN1:TAH1:YFH1:SNA4:RCR2:YDR061W:TAF10:MFB1:IVY1:PEX3:GGA1:STE14:YDR476C:CWC21:AFG1:SPC25:GPA2:YER034W:EDC2:YER067W:GET2:BUR6:YMR31:YGL010W:SDS23:BUD13:HOS2:SWC4:YGR031W:LSB1:NAT2:PTI1:YGR205W:FMP43:YHL008C:SAM35:ARC15:RRD1:DSN1:SYS1:DLS1:IDS2:NNF1:CSE4:TOA2:YKL061W:AVT3:MEH1:ISA1:PEX30:ORM2:NBP1:CUE4:CAC2:DAT1:MED…	5678:5783:5789:16602:46695:35267:324:5643:5823:329:508:5681:5682:5829:8623:5935:5685:5759:5794:43541:118:151:119:1401:5727:31315:5655:267:5762:5763:5768:42175:775:123:776:124:778:19898:5802:5624:5730:16592:32777:5737:5739:5773:812:5847:5669:5777:922:5778:5779:817:31902:818:5885:5886:780:788:43529:30136:139:5634:5635:5740:172:5741:31982:16021:5743:30173:5816:46540:5672:31262:30176
43231	intracellular membrane-bound organelle	95 out of 129 genes, 73.6%	3674 out of 7288 background genes, 50.4%	9.28e-06	POP5:HAP3:RIB1:SFT2:ALG14:MED8:KTR4:AME1:PRP5:YBR241C:SRB6:FMP51:MRPL37:BSD2:SGF29:PBN1:TAH1:YFH1:SNA4:RCR2:YDR061W:TAF10:MFB1:IVY1:PEX3:GGA1:STE14:YDR476C:CWC21:AFG1:SPC25:GPA2:YER034W:EDC2:YER067W:GET2:BUR6:YMR31:YGL010W:SDS23:BUD13:HOS2:SWC4:YGR031W:LSB1:NAT2:PTI1:YGR205W:FMP43:YHL008C:SAM35:ARC15:RRD1:DSN1:SYS1:DLS1:IDS2:NNF1:CSE4:TOA2:YKL061W:AVT3:MEH1:ISA1:PEX30:ORM2:NBP1:CUE4:CAC2:DAT1:MED…	5678:5783:5789:16602:46695:35267:324:5643:5823:329:508:5681:5682:5829:8623:5935:5685:5759:5794:43541:118:151:119:1401:5727:31315:5655:267:5762:5763:5768:42175:775:123:776:124:778:19898:5802:5624:5730:16592:32777:5737:5739:5773:812:5847:5669:5777:922:5778:5779:817:31902:818:5885:5886:780:788:43529:30136:139:5634:5635:5740:172:5741:31982:16021:5743:30173:5816:46540:5672:31262:30176
43229	intracellular organelle	98 out of 129 genes, 76.0%	4021 out of 7288 background genes, 55.2%	0.00012	POP5:HAP3:RIB1:SFT2:ALG14:MED8:KTR4:AME1:PRP5:YBR241C:SRB6:FMP51:MRPL37:BSD2:SGF29:PBN1:TAH1:YFH1:SNA4:RCR2:YDR061W:TAF10:MFB1:IVY1:PEX3:GGA1:STE14:YDR476C:CWC21:AFG1:SPC25:GPA2:YER034W:EDC2:YER067W:GET2:BUR6:YMR31:YGL010W:SDS23:BUD13:HOS2:SWC4:YGR031W:LSB1:NAT2:PTI1:YGR205W:FMP43:YHL008C:SAM35:ARC15:RRD1:YIR003W:DSN1:SYS1:DLS1:IDS2:NNF1:CSE4:TOA2:YKL061W:AVT3:MEH1:ISA1:ENT4:PEX30:ORM2:NBP1:CUE4:…	5678:5783:5789:16602:46695:15629:35267:324:5643:5823:329:508:5681:5682:5829:8623:5935:5685:5759:5794:30479:43541:118:151:119:1401:5727:31315:5655:267:5762:5763:5768:42175:775:123:776:124:778:19898:5802:5624:5730:16592:32777:5840:5737:5739:5773:812:5847:5669:5777:922:5778:5779:817:31902:818:5885:5886:780:788:43529:30136:139:5634:5635:5740:172:5741:31982:16021:5743:30173:5816:46540:5672:31262:30176
43226	organelle	98 out of 129 genes, 76.0%	4022 out of 7288 background genes, 55.2%	0.00012	POP5:HAP3:RIB1:SFT2:ALG14:MED8:KTR4:AME1:PRP5:YBR241C:SRB6:FMP51:MRPL37:BSD2:SGF29:PBN1:TAH1:YFH1:SNA4:RCR2:YDR061W:TAF10:MFB1:IVY1:PEX3:GGA1:STE14:YDR476C:CWC21:AFG1:SPC25:GPA2:YER034W:EDC2:YER067W:GET2:BUR6:YMR31:YGL010W:SDS23:BUD13:HOS2:SWC4:YGR031W:LSB1:NAT2:PTI1:YGR205W:FMP43:YHL008C:SAM35:ARC15:RRD1:YIR003W:DSN1:SYS1:DLS1:IDS2:NNF1:CSE4:TOA2:YKL061W:AVT3:MEH1:ISA1:ENT4:PEX30:ORM2:NBP1:CUE4:…	5678:5783:5789:16602:46695:15629:35267:324:5643:5823:329:508:5681:5682:5829:8623:5935:5685:5759:5794:30479:43541:118:151:119:1401:5727:31315:5655:267:5762:5763:5768:42175:775:123:776:124:778:19898:5802:5624:5730:16592:32777:5840:5737:5739:5773:812:5847:5669:5777:922:5778:5779:817:31902:818:5885:5886:780:788:43529:30136:139:5634:5635:5740:172:5741:31982:16021:5743:30173:5816:46540:5672:31262:30176
44451	nucleoplasm part	17 out of 129 genes, 13.2%	307 out of 7288 background genes, 4.2%	0.00507	HAP3:MED8:SRB6:SGF29:TAF10:HOS2:SWC4:PTI1:DLS1:TOA2:CAC2:MED11:TAF9:SYC1:ESA1:SGF11:CTI6	5678:16602:46695:35267:508:8623:118:119:775:123:124:16592:32777:812:5847:5669:5634:5672
Bi-cluster 2	Score 264
				Mean pattern, and conditions
YOR002W	ALG6	YOR002W
YML102W	CAC2	YML102W
YOL007C	CSI2	YOL007C
YPR124W	CTR1	YPR124W
YHR175W	CTR2	YHR175W
YGR036C	CAX4	YGR036C
YML113W	DAT1	YML113W
YHR169W	DBP8	YHR169W
YPL049C	DIG1	YPL049C
YNL327W	EGT2	YNL327W
YHR061C	GIC1	YHR061C
YER107C	GLE2	YER107C
YBL021C	HAP3	YBL021C
YJR147W	HMS2	YJR147W
YBR272C	HSM3	YBR272C
YHR127W	non	YHR127W
YDL003W	MCD1	YDL003W
YDR347W	MRP1	YDR347W
YGR084C	MRP13	YGR084C
YMR286W	MRPL33	YMR286W
YBR268W	MRPL37	YBR268W
YJL063C	MRPL8	YJL063C
YOR188W	MSB1	YOR188W
YGR014W	MSB2	YGR014W
YGR147C	NAT2	YGR147C
YML031W	NDC1	YML031W
YPL124W	SPC29	YPL124W
YJR112W	NNF1	YJR112W
YDL167C	NRP1	YDL167C
YKL068W	NUP100	YKL068W
YOR360C	PDE2	YOR360C
YER132C	PMD1	YER132C
YKL128C	PMU1	YKL128C
YNL290W	RFC3	YNL290W
YHR062C	RPP1	YHR062C
YIL153W	RRD1	YIL153W
YDL111C	RRP42	YDL111C
YML049C	RSE1	YML049C
YBR070C	ALG14	YBR070C
YOL020W	TAT2	YOL020W
YGL126W	SCS3	YGL126W
YCR067C	SED4	YCR067C
YPL083C	SEN54	YPL083C
YBL102W	SFT2	YBL102W
YPR182W	SMX3	YPR182W
YMR016C	SOK2	YMR016C
YHR136C	SPL2	YHR136C
YDR410C	STE14	YDR410C
YGL169W	SUA5	YGL169W
YJL004C	SYS1	YJL004C
YMR236W	TAF9	YMR236W
YDR167W	TAF10	YDR167W
YNR017W	MAS6	YNR017W
YDR354W	TRP4	YDR354W
YBR069C	TAT1	YBR069C
YLR396C	VPS33	YLR396C
YAL033W	POP5	YAL033W
YBR254C	TRS20	YBR254C
YCR027C	RHB1	YCR027C
YCR060W	TAH1	YCR060W
YDL123W	SNA4	YDL123W
YDL203C	ACK1	YDL203C
YDR061W	non	YDR061W
YDR205W	MSC2	YDR205W
YDR239C	non	YDR239C
YDR352W	non	YDR352W
YDR476C	non	YDR476C
YDR482C	CWC21	YDR482C
YDR524C	AGE1	YDR524C
YER018C	SPC25	YER018C
YER034W	non	YER034W
YER035W	EDC2	YER035W
YER092W	IES5	YER092W
YER113C	non	YER113C
YDL120W	YFH1	YDL120W
YGL174W	BUD13	YGL174W
YGR031W	non	YGR031W
YHR083W	SAM35	YHR083W
YHR085W	IPI1	YHR085W
YHR149C	SKG6	YHR149C
YHR192W	non	YHR192W
YIL158W	non	YIL158W
YJL062W	LAS21	YJL062W
YJL065C	DLS1	YJL065C
YJL207C	LAA1	YJL207C
YJR003C	non	YJR003C
YJR013W	GPI14	YJR013W
YJR083C	ACF4	YJR083C
YJR097W	JJJ3	YJR097W
YJR113C	RSM7	YJR113C
YKL116C	PRR1	YKL116C
YKL146W	AVT3	YKL146W
YKL183W	LOT5	YKL183W
YKL206C	ADD66	YKL206C
YKR045C	non	YKR045C
YKR100C	SKG1	YKR100C
YLL038C	ENT4	YLL038C
YLR073C	non	YLR073C
YLR084C	RAX2	YLR084C
YLR405W	DUS4	YLR405W
YLR413W	non	YLR413W
YML005W	TRM12	YML005W
YML014W	TRM9	YML014W
YML018C	non	YML018C
YML096W	non	YML096W
YML101C	CUE4	YML101C
YMR086W	non	YMR086W
YMR112C	MED11	YMR112C
YMR153W	NUP53	YMR153W
YNL065W	AQR1	YNL065W
YNL078W	NIS1	YNL078W
YNL157W	IGO1	YNL157W
YNL158W	PGA1	YNL158W
YNL245C	CWC25	YNL245C
YNL326C	PFA3	YNL326C
YNR027W	BUD17	YNR027W
YNR039C	ZRG17	YNR039C
YOR004W	UTP23	YOR004W
YOR179C	SYC1	YOR179C
YOR291W	non	YOR291W
YOR322C	LDB19	YOR322C
YOR342C	non	YOR342C
YOR372C	NDD1	YOR372C
YPL183C	non	YPL183C
YPL208W	RKM1	YPL208W
YPL246C	RBD2	YPL246C
YPR008W	HAA1	YPR008W
YPR171W	BSP1	YPR171W
GO Enrichments
Component
GOID	GO_term	Cluster frequency	Background frequency	P-value	Gene(s) annotated to the term	Directly Annotated GOID List
44464	cell part	125 out of 128 genes, 97.7%	5495 out of 7288 background genes, 75.4%	3.91e-10	POP5:HAP3:SFT2:TAT1:ALG14:TRS20:MRPL37:HSM3:RHB1:TAH1:SED4:MCD1:RRP42:YFH1:SNA4:NRP1:ACK1:YDR061W:TAF10:MSC2:YDR239C:MRP1:YDR352W:TRP4:STE14:YDR476C:CWC21:AGE1:SPC25:YER034W:EDC2:IES5:GLE2:YER113C:PMD1:SCS3:SUA5:BUD13:MSB2:YGR031W:CAX4:MRP13:NAT2:GIC1:RPP1:SAM35:IPI1:YHR127W:SPL2:SKG6:DBP8:CTR2:YHR192W:RRD1:YIL158W:SYS1:LAS21:MRPL8:DLS1:LAA1:YJR003C:GPI14:JJJ3:NNF1:RSM7:HMS2:NUP100:PRR1:PMU1:AVT3…	5678:5783:9277:5789:16602:46695:214:798:324:5643:5823:329:5681:5682:5933:5829:8623:5934:5935:5685:5686:5759:5938:5794:30478:30479:30008:43541:119:32040:1401:5654:5655:267:5762:5763:5768:43332:42175:775:30121:776:124:778:5621:19897:19898:5624:5802:5730:16592:5840:5663:5737:5739:5847:5669:922:818:5886:780:5887:131:30136:5634:139:30137:5635:172:16020:5741:30897:5637:16021:30173:5816:46540:5744:176:1…
44424	intracellular part	117 out of 128 genes, 91.4%	5052 out of 7288 background genes, 69.3%	2.65e-07	POP5:HAP3:SFT2:ALG14:TRS20:MRPL37:HSM3:TAH1:SED4:MCD1:RRP42:YFH1:SNA4:NRP1:ACK1:YDR061W:TAF10:MSC2:YDR239C:MRP1:YDR352W:TRP4:STE14:YDR476C:CWC21:AGE1:SPC25:YER034W:EDC2:IES5:GLE2:YER113C:PMD1:SCS3:SUA5:BUD13:YGR031W:CAX4:MRP13:NAT2:GIC1:RPP1:SAM35:IPI1:YHR127W:SPL2:SKG6:DBP8:CTR2:YHR192W:RRD1:YIL158W:SYS1:LAS21:MRPL8:DLS1:LAA1:YJR003C:GPI14:JJJ3:NNF1:RSM7:HMS2:NUP100:PRR1:PMU1:AVT3:LOT5:ADD66:YKR…	5678:5783:5789:16602:46695:214:798:324:5643:5823:329:5681:5682:5933:5829:8623:5934:5935:5685:5686:5759:5938:5794:30478:30479:30008:43541:119:32040:1401:5654:5655:267:5762:5763:5768:43332:42175:775:776:30121:124:778:5621:19898:5802:5624:5730:16592:5840:5663:5737:5739:5847:5669:922:818:5887:780:131:30136:30137:139:5634:5635:172:30897:5741:16020:5637:16021:5816:30173:46540:5744:176:177:31262:30176
5622	intracellular	117 out of 128 genes, 91.4%	5087 out of 7288 background genes, 69.8%	5.08e-07	POP5:HAP3:SFT2:ALG14:TRS20:MRPL37:HSM3:TAH1:SED4:MCD1:RRP42:YFH1:SNA4:NRP1:ACK1:YDR061W:TAF10:MSC2:YDR239C:MRP1:YDR352W:TRP4:STE14:YDR476C:CWC21:AGE1:SPC25:YER034W:EDC2:IES5:GLE2:YER113C:PMD1:SCS3:SUA5:BUD13:YGR031W:CAX4:MRP13:NAT2:GIC1:RPP1:SAM35:IPI1:YHR127W:SPL2:SKG6:DBP8:CTR2:YHR192W:RRD1:YIL158W:SYS1:LAS21:MRPL8:DLS1:LAA1:YJR003C:GPI14:JJJ3:NNF1:RSM7:HMS2:NUP100:PRR1:PMU1:AVT3:LOT5:ADD66:YKR…	5678:5783:5789:16602:46695:214:798:324:5643:5823:329:5681:5682:5933:5829:8623:5934:5935:5685:5686:5759:5938:5794:30478:30479:30008:43541:119:32040:1401:5654:5655:267:5762:5763:5768:43332:42175:775:776:30121:124:778:5621:19898:5802:5624:5730:16592:5840:5663:5737:5739:5847:5669:922:818:5887:780:131:30136:30137:139:5634:5635:172:30897:5741:16020:5637:16021:5816:30173:46540:5744:176:177:31262:30176
43229	intracellular organelle	102 out of 128 genes, 79.7%	4021 out of 7288 background genes, 55.2%	8.84e-07	POP5:HAP3:SFT2:ALG14:TRS20:MRPL37:TAH1:SED4:MCD1:RRP42:YFH1:SNA4:ACK1:YDR061W:TAF10:MSC2:YDR239C:MRP1:YDR352W:TRP4:STE14:YDR476C:CWC21:SPC25:YER034W:EDC2:IES5:GLE2:YER113C:SCS3:BUD13:YGR031W:CAX4:MRP13:NAT2:GIC1:RPP1:SAM35:IPI1:YHR127W:DBP8:CTR2:RRD1:YIL158W:SYS1:LAS21:MRPL8:DLS1:LAA1:YJR003C:GPI14:JJJ3:NNF1:RSM7:HMS2:NUP100:PMU1:AVT3:LOT5:ENT4:YLR073C:RAX2:VPS33:TRM9:YML018C:NDC1:RSE1:CUE4:CAC2:…	5678:5783:5789:16602:46695:214:798:324:5643:5823:329:5681:5682:5829:8623:5934:5935:5685:5686:5759:5794:30478:30479:30008:43541:119:32040:1401:5654:5655:267:5762:5763:5768:43332:42175:775:776:30121:124:778:5621:19898:5802:5624:5730:16592:5840:5663:5737:5739:5847:5669:922:818:5887:780:131:30136:30137:139:5634:5635:172:30897:5741:16020:5637:5816:30173:46540:5744:176:177:31262:30176
43226	organelle	102 out of 128 genes, 79.7%	4022 out of 7288 background genes, 55.2%	9e-07	POP5:HAP3:SFT2:ALG14:TRS20:MRPL37:TAH1:SED4:MCD1:RRP42:YFH1:SNA4:ACK1:YDR061W:TAF10:MSC2:YDR239C:MRP1:YDR352W:TRP4:STE14:YDR476C:CWC21:SPC25:YER034W:EDC2:IES5:GLE2:YER113C:SCS3:BUD13:YGR031W:CAX4:MRP13:NAT2:GIC1:RPP1:SAM35:IPI1:YHR127W:DBP8:CTR2:RRD1:YIL158W:SYS1:LAS21:MRPL8:DLS1:LAA1:YJR003C:GPI14:JJJ3:NNF1:RSM7:HMS2:NUP100:PMU1:AVT3:LOT5:ENT4:YLR073C:RAX2:VPS33:TRM9:YML018C:NDC1:RSE1:CUE4:CAC2:…	5678:5783:5789:16602:46695:214:798:324:5643:5823:329:5681:5682:5829:8623:5934:5935:5685:5686:5759:5794:30478:30479:30008:43541:119:32040:1401:5654:5655:267:5762:5763:5768:43332:42175:775:776:30121:124:778:5621:19898:5802:5624:5730:16592:5840:5663:5737:5739:5847:5669:922:818:5887:780:131:30136:30137:139:5634:5635:172:30897:5741:16020:5637:5816:30173:46540:5744:176:177:31262:30176
43227	membrane-bound organelle	96 out of 128 genes, 75.0%	3674 out of 7288 background genes, 50.4%	1.71e-06	POP5:HAP3:SFT2:ALG14:TRS20:MRPL37:TAH1:SED4:MCD1:RRP42:YFH1:SNA4:ACK1:YDR061W:TAF10:MSC2:MRP1:YDR352W:TRP4:STE14:YDR476C:CWC21:SPC25:YER034W:EDC2:IES5:GLE2:YER113C:SCS3:BUD13:YGR031W:CAX4:MRP13:NAT2:RPP1:SAM35:IPI1:YHR127W:DBP8:CTR2:RRD1:YIL158W:SYS1:LAS21:MRPL8:DLS1:LAA1:YJR003C:GPI14:JJJ3:NNF1:RSM7:HMS2:NUP100:PMU1:AVT3:LOT5:YLR073C:RAX2:VPS33:TRM9:YML018C:NDC1:RSE1:CUE4:CAC2:DAT1:SOK2:MED11:NU…	5678:5783:5789:16602:46695:214:798:324:5643:329:5681:5682:5934:5829:8623:5935:5685:5686:5759:5794:30008:43541:119:32040:1401:5654:5655:267:5762:5763:5768:42175:775:776:30121:124:778:5621:19898:5802:5624:5730:16592:5840:5663:5737:5739:5847:5669:922:818:5887:780:30136:30137:139:5634:5635:172:30897:5741:16020:5637:5816:30173:46540:5744:176:177:31262:30176
43231	intracellular membrane-bound organelle	96 out of 128 genes, 75.0%	3674 out of 7288 background genes, 50.4%	1.71e-06	POP5:HAP3:SFT2:ALG14:TRS20:MRPL37:TAH1:SED4:MCD1:RRP42:YFH1:SNA4:ACK1:YDR061W:TAF10:MSC2:MRP1:YDR352W:TRP4:STE14:YDR476C:CWC21:SPC25:YER034W:EDC2:IES5:GLE2:YER113C:SCS3:BUD13:YGR031W:CAX4:MRP13:NAT2:RPP1:SAM35:IPI1:YHR127W:DBP8:CTR2:RRD1:YIL158W:SYS1:LAS21:MRPL8:DLS1:LAA1:YJR003C:GPI14:JJJ3:NNF1:RSM7:HMS2:NUP100:PMU1:AVT3:LOT5:YLR073C:RAX2:VPS33:TRM9:YML018C:NDC1:RSE1:CUE4:CAC2:DAT1:SOK2:MED11:NU…	5678:5783:5789:16602:46695:214:798:324:5643:329:5681:5682:5934:5829:8623:5935:5685:5686:5759:5794:30008:43541:119:32040:1401:5654:5655:267:5762:5763:5768:42175:775:776:30121:124:778:5621:19898:5802:5624:5730:16592:5840:5663:5737:5739:5847:5669:922:818:5887:780:30136:30137:139:5634:5635:172:30897:5741:16020:5637:5816:30173:46540:5744:176:177:31262:30176
Bi-cluster 3	Score 305			Mean pattern, and conditions
YOR002W	ALG6	YOR002W
YML102W	CAC2	YML102W
YOL007C	CSI2	YOL007C
YPR124W	CTR1	YPR124W
YHR175W	CTR2	YHR175W
YGR036C	CAX4	YGR036C
YML113W	DAT1	YML113W
YHR169W	DBP8	YHR169W
YPL049C	DIG1	YPL049C
YNL327W	EGT2	YNL327W
YHR061C	GIC1	YHR061C
YER107C	GLE2	YER107C
YBL021C	HAP3	YBL021C
YJR147W	HMS2	YJR147W
YHR127W	non	YHR127W
YDL003W	MCD1	YDL003W
YDR347W	MRP1	YDR347W
YGR084C	MRP13	YGR084C
YMR286W	MRPL33	YMR286W
YBR268W	MRPL37	YBR268W
YJL063C	MRPL8	YJL063C
YOR188W	MSB1	YOR188W
YGR014W	MSB2	YGR014W
YGR147C	NAT2	YGR147C
YML031W	NDC1	YML031W
YPL124W	SPC29	YPL124W
YJR112W	NNF1	YJR112W
YDL167C	NRP1	YDL167C
YKL068W	NUP100	YKL068W
YOR360C	PDE2	YOR360C
YER132C	PMD1	YER132C
YHR062C	RPP1	YHR062C
YIL153W	RRD1	YIL153W
YDL111C	RRP42	YDL111C
YBR070C	ALG14	YBR070C
YOL020W	TAT2	YOL020W
YGL126W	SCS3	YGL126W
YCR067C	SED4	YCR067C
YBL102W	SFT2	YBL102W
YPR182W	SMX3	YPR182W
YMR016C	SOK2	YMR016C
YHR136C	SPL2	YHR136C
YDR410C	STE14	YDR410C
YGL169W	SUA5	YGL169W
YJL004C	SYS1	YJL004C
YMR236W	TAF9	YMR236W
YDR167W	TAF10	YDR167W
YBR069C	TAT1	YBR069C
YLR396C	VPS33	YLR396C
YAL033W	POP5	YAL033W
YBR254C	TRS20	YBR254C
YCR027C	RHB1	YCR027C
YCR060W	TAH1	YCR060W
YDL123W	SNA4	YDL123W
YDL203C	ACK1	YDL203C
YDR061W	non	YDR061W
YDR205W	MSC2	YDR205W
YDR239C	non	YDR239C
YDR352W	non	YDR352W
YDR476C	non	YDR476C
YDR482C	CWC21	YDR482C
YDR524C	AGE1	YDR524C
YER018C	SPC25	YER018C
YER034W	non	YER034W
YER035W	EDC2	YER035W
YER092W	IES5	YER092W
YER113C	non	YER113C
YDL120W	YFH1	YDL120W
YGL174W	BUD13	YGL174W
YGR031W	non	YGR031W
YHR083W	SAM35	YHR083W
YHR085W	IPI1	YHR085W
YHR149C	SKG6	YHR149C
YIL158W	non	YIL158W
YJL062W	LAS21	YJL062W
YJL065C	DLS1	YJL065C
YJR003C	non	YJR003C
YJR013W	GPI14	YJR013W
YJR097W	JJJ3	YJR097W
YJR113C	RSM7	YJR113C
YKL116C	PRR1	YKL116C
YKL146W	AVT3	YKL146W
YKL183W	LOT5	YKL183W
YKL206C	ADD66	YKL206C
YKR045C	non	YKR045C
YLL038C	ENT4	YLL038C
YLR073C	non	YLR073C
YLR084C	RAX2	YLR084C
YLR405W	DUS4	YLR405W
YLR413W	non	YLR413W
YML005W	TRM12	YML005W
YML014W	TRM9	YML014W
YML018C	non	YML018C
YML082W	non	YML082W
YML096W	non	YML096W
YML101C	CUE4	YML101C
YMR086W	non	YMR086W
YMR112C	MED11	YMR112C
YMR153W	NUP53	YMR153W
YMR313C	TGL3	YMR313C
YNL065W	AQR1	YNL065W
YNL078W	NIS1	YNL078W
YNL157W	IGO1	YNL157W
YNL158W	PGA1	YNL158W
YNL245C	CWC25	YNL245C
YNL326C	PFA3	YNL326C
YNR027W	BUD17	YNR027W
YNR039C	ZRG17	YNR039C
YOR004W	UTP23	YOR004W
YOR179C	SYC1	YOR179C
YOR291W	non	YOR291W
YOR322C	LDB19	YOR322C
YOR342C	non	YOR342C
YOR372C	NDD1	YOR372C
YPL183C	non	YPL183C
YPL208W	RKM1	YPL208W
YPL246C	RBD2	YPL246C
YPR008W	HAA1	YPR008W
YPR171W	BSP1	YPR171W
YDR349C	YPS7	YDR349C
GO Enrichments
Component
GOID	GO_term	Cluster frequency	Background frequency	P-value	Gene(s) annotated to the term	Directly Annotated GOID List
44464	cell part	118 out of 120 genes, 98.3%	5495 out of 7288 background genes, 75.4%	2.09e-10	POP5:HAP3:SFT2:TAT1:ALG14:TRS20:MRPL37:RHB1:TAH1:SED4:MCD1:RRP42:YFH1:SNA4:NRP1:ACK1:YDR061W:TAF10:MSC2:YDR239C:MRP1:YPS7:YDR352W:STE14:YDR476C:CWC21:AGE1:SPC25:YER034W:EDC2:IES5:GLE2:YER113C:PMD1:SCS3:SUA5:BUD13:MSB2:YGR031W:CAX4:MRP13:NAT2:GIC1:RPP1:SAM35:IPI1:YHR127W:SPL2:SKG6:DBP8:CTR2:RRD1:YIL158W:SYS1:LAS21:MRPL8:DLS1:YJR003C:GPI14:JJJ3:NNF1:RSM7:HMS2:NUP100:PRR1:AVT3:LOT5:ADD66:YKR045C:ENT…	5678:5783:9277:5789:16602:46695:798:324:5643:5823:329:5681:5682:5933:5829:8623:5934:5935:5685:5759:5938:5794:30478:30479:30008:43541:119:32040:1401:5654:5655:267:5762:5763:5768:43332:42175:775:776:124:778:5621:19897:19898:5624:5802:5730:16592:5840:5737:5739:5847:5669:922:818:5886:780:5887:131:30136:5811:5634:139:30137:5635:172:16020:5741:30897:16021:30173:5816:46540:176:177:31262:30176:30427
43229	intracellular organelle	97 out of 120 genes, 80.8%	4021 out of 7288 background genes, 55.2%	4.45e-07	POP5:HAP3:SFT2:ALG14:TRS20:MRPL37:TAH1:SED4:MCD1:RRP42:YFH1:SNA4:ACK1:YDR061W:TAF10:MSC2:YDR239C:MRP1:YPS7:YDR352W:STE14:YDR476C:CWC21:SPC25:YER034W:EDC2:IES5:GLE2:YER113C:SCS3:BUD13:YGR031W:CAX4:MRP13:NAT2:GIC1:RPP1:SAM35:IPI1:YHR127W:DBP8:CTR2:RRD1:YIL158W:SYS1:LAS21:MRPL8:DLS1:YJR003C:GPI14:JJJ3:NNF1:RSM7:HMS2:NUP100:AVT3:LOT5:ENT4:YLR073C:RAX2:VPS33:TRM9:YML018C:NDC1:YML082W:CUE4:CAC2:DAT1:SO…	5678:5783:5789:16602:46695:798:324:5643:5823:329:5681:5682:5829:8623:5934:5935:5685:5759:5794:30478:30479:30008:43541:119:32040:1401:5654:5655:267:5762:5763:5768:43332:42175:775:776:124:778:5621:19898:5802:5624:5730:16592:5840:5737:5739:5847:5669:922:818:5887:780:131:30136:30137:139:5634:5635:172:30897:5741:16020:5816:30173:46540:176:177:31262:30176
43226	organelle	97 out of 120 genes, 80.8%	4022 out of 7288 background genes, 55.2%	4.53e-07	POP5:HAP3:SFT2:ALG14:TRS20:MRPL37:TAH1:SED4:MCD1:RRP42:YFH1:SNA4:ACK1:YDR061W:TAF10:MSC2:YDR239C:MRP1:YPS7:YDR352W:STE14:YDR476C:CWC21:SPC25:YER034W:EDC2:IES5:GLE2:YER113C:SCS3:BUD13:YGR031W:CAX4:MRP13:NAT2:GIC1:RPP1:SAM35:IPI1:YHR127W:DBP8:CTR2:RRD1:YIL158W:SYS1:LAS21:MRPL8:DLS1:YJR003C:GPI14:JJJ3:NNF1:RSM7:HMS2:NUP100:AVT3:LOT5:ENT4:YLR073C:RAX2:VPS33:TRM9:YML018C:NDC1:YML082W:CUE4:CAC2:DAT1:SO…	5678:5783:5789:16602:46695:798:324:5643:5823:329:5681:5682:5829:8623:5934:5935:5685:5759:5794:30478:30479:30008:43541:119:32040:1401:5654:5655:267:5762:5763:5768:43332:42175:775:776:124:778:5621:19898:5802:5624:5730:16592:5840:5737:5739:5847:5669:922:818:5887:780:131:30136:30137:139:5634:5635:172:30897:5741:16020:5816:30173:46540:176:177:31262:30176
44424	intracellular part	110 out of 120 genes, 91.7%	5052 out of 7288 background genes, 69.3%	4.77e-07	POP5:HAP3:SFT2:ALG14:TRS20:MRPL37:TAH1:SED4:MCD1:RRP42:YFH1:SNA4:NRP1:ACK1:YDR061W:TAF10:MSC2:YDR239C:MRP1:YPS7:YDR352W:STE14:YDR476C:CWC21:AGE1:SPC25:YER034W:EDC2:IES5:GLE2:YER113C:PMD1:SCS3:SUA5:BUD13:YGR031W:CAX4:MRP13:NAT2:GIC1:RPP1:SAM35:IPI1:YHR127W:SPL2:SKG6:DBP8:CTR2:RRD1:YIL158W:SYS1:LAS21:MRPL8:DLS1:YJR003C:GPI14:JJJ3:NNF1:RSM7:HMS2:NUP100:PRR1:AVT3:LOT5:ADD66:YKR045C:ENT4:YLR073C:RAX2:…	5678:5783:5789:16602:46695:798:324:5643:5823:329:5681:5682:5829:8623:5934:5935:5685:5759:5938:5794:30478:30479:30008:43541:119:32040:1401:5654:5655:267:5762:5763:5768:43332:42175:775:776:124:778:5621:19898:5802:5624:5730:16592:5840:5737:5739:5847:5669:922:818:5887:780:131:30136:5811:30137:139:5634:5635:172:30897:5741:16020:16021:5816:30173:46540:176:177:31262:30176
5622	intracellular	110 out of 120 genes, 91.7%	5087 out of 7288 background genes, 69.8%	8.83e-07	POP5:HAP3:SFT2:ALG14:TRS20:MRPL37:TAH1:SED4:MCD1:RRP42:YFH1:SNA4:NRP1:ACK1:YDR061W:TAF10:MSC2:YDR239C:MRP1:YPS7:YDR352W:STE14:YDR476C:CWC21:AGE1:SPC25:YER034W:EDC2:IES5:GLE2:YER113C:PMD1:SCS3:SUA5:BUD13:YGR031W:CAX4:MRP13:NAT2:GIC1:RPP1:SAM35:IPI1:YHR127W:SPL2:SKG6:DBP8:CTR2:RRD1:YIL158W:SYS1:LAS21:MRPL8:DLS1:YJR003C:GPI14:JJJ3:NNF1:RSM7:HMS2:NUP100:PRR1:AVT3:LOT5:ADD66:YKR045C:ENT4:YLR073C:RAX2:…	5678:5783:5789:16602:46695:798:324:5643:5823:329:5681:5682:5829:8623:5934:5935:5685:5759:5938:5794:30478:30479:30008:43541:119:32040:1401:5654:5655:267:5762:5763:5768:43332:42175:775:776:124:778:5621:19898:5802:5624:5730:16592:5840:5737:5739:5847:5669:922:818:5887:780:131:30136:5811:30137:139:5634:5635:172:30897:5741:16020:16021:5816:30173:46540:176:177:31262:30176
43227	membrane-bound organelle	91 out of 120 genes, 75.8%	3674 out of 7288 background genes, 50.4%	1.42e-06	POP5:HAP3:SFT2:ALG14:TRS20:MRPL37:TAH1:SED4:MCD1:RRP42:YFH1:SNA4:ACK1:YDR061W:TAF10:MSC2:MRP1:YPS7:YDR352W:STE14:YDR476C:CWC21:SPC25:YER034W:EDC2:IES5:GLE2:YER113C:SCS3:BUD13:YGR031W:CAX4:MRP13:NAT2:RPP1:SAM35:IPI1:YHR127W:DBP8:CTR2:RRD1:YIL158W:SYS1:LAS21:MRPL8:DLS1:YJR003C:GPI14:JJJ3:NNF1:RSM7:HMS2:NUP100:AVT3:LOT5:YLR073C:RAX2:VPS33:TRM9:YML018C:NDC1:YML082W:CUE4:CAC2:DAT1:SOK2:MED11:NUP53:TAF…	5678:5783:5789:16602:46695:798:324:5643:329:5681:5682:5934:5829:8623:5935:5685:5759:5794:30008:43541:119:32040:1401:5654:5655:267:5762:5763:5768:42175:775:776:124:778:5621:19898:5802:5624:5730:16592:5737:5739:5847:5669:922:818:5887:780:30136:30137:139:5634:5635:172:30897:5741:16020:5816:30173:46540:176:177:31262:30176
43231	intracellular membrane-bound organelle	91 out of 120 genes, 75.8%	3674 out of 7288 background genes, 50.4%	1.42e-06	POP5:HAP3:SFT2:ALG14:TRS20:MRPL37:TAH1:SED4:MCD1:RRP42:YFH1:SNA4:ACK1:YDR061W:TAF10:MSC2:MRP1:YPS7:YDR352W:STE14:YDR476C:CWC21:SPC25:YER034W:EDC2:IES5:GLE2:YER113C:SCS3:BUD13:YGR031W:CAX4:MRP13:NAT2:RPP1:SAM35:IPI1:YHR127W:DBP8:CTR2:RRD1:YIL158W:SYS1:LAS21:MRPL8:DLS1:YJR003C:GPI14:JJJ3:NNF1:RSM7:HMS2:NUP100:AVT3:LOT5:YLR073C:RAX2:VPS33:TRM9:YML018C:NDC1:YML082W:CUE4:CAC2:DAT1:SOK2:MED11:NUP53:TAF…	5678:5783:5789:16602:46695:798:324:5643:329:5681:5682:5934:5829:8623:5935:5685:5759:5794:30008:43541:119:32040:1401:5654:5655:267:5762:5763:5768:42175:775:776:124:778:5621:19898:5802:5624:5730:16592:5737:5739:5847:5669:922:818:5887:780:30136:30137:139:5634:5635:172:30897:5741:16020:5816:30173:46540:176:177:31262:30176
Bi-cluster 4	Score 317
				Mean pattern, and conditions
YGR037C	ACB1	YGR037C
YPL061W	ALD6	YPL061W
YGL105W	ARC1	YGL105W
YBR249C	ARO4	YBR249C
YJR121W	ATP2	YJR121W
YBR039W	ATP3	YBR039W
YOR198C	BFR1	YOR198C
YER177W	BMH1	YER177W
YDR099W	BMH2	YDR099W
YOR276W	CAF20	YOR276W
YOL139C	CDC33	YOL139C
YAL012W	CYS3	YAL012W
YHR068W	DYS1	YHR068W
YDR385W	EFT2	YDR385W
YPL028W	ERG10	YPL028W
YHR007C	ERG11	YHR007C
YGR060W	ERG25	YGR060W
YMR015C	ERG5	YMR015C
YPL231W	FAS2	YPL231W
YKL060C	FBA1	YKL060C
YOR375C	GDH1	YOR375C
YBR121C	GRS1	YBR121C
YDR454C	GUK1	YDR454C
YML126C	ERG13	YML126C
YDR158W	HOM2	YDR158W
YJR139C	HOM6	YJR139C
YER062C	HOR2	YER062C
YMR186W	HSC82	YMR186W
YFL014W	HSP12	YFL014W
YBR072W	HSP26	YBR072W
YGL253W	HXK2	YGL253W
YBL076C	ILS1	YBL076C
YER110C	KAP123	YER110C
YIL094C	LYS12	YIL094C
YNR050C	LYS9	YNR050C
YER091C	MET6	YER091C
YJR077C	MIR1	YJR077C
YDL208W	NHP2	YDL208W
YPR052C	NHP6A	YPR052C
YOR310C	NOP58	YOR310C
YLR197W	SIK1	YLR197W
YDR432W	NPL3	YDR432W
YGR159C	NSR1	YGR159C
YGL055W	OLE1	YGL055W
YER165W	PAB1	YER165W
YNL015W	PBI2	YNL015W
YHR064C	SSZ1	YHR064C
YGR240C	PFK1	YGR240C
YMR205C	PFK2	YMR205C
YBR196C	PGI1	YBR196C
YCR012W	PGK1	YCR012W
YBR106W	PHO88	YBR106W
YGL008C	PMA1	YGL008C
YNL055C	POR1	YNL055C
YAL038W	CDC19	YAL038W
YGR180C	RNR4	YGR180C
YOR210W	RPB10	YOR210W
YPR102C	RPL11A	YPR102C
YEL054C	RPL12A	YEL054C
YGL135W	RPL1B	YGL135W
YMR242C	RPL20A	YMR242C
YOR063W	RPL3	YOR063W
YPL131W	RPL5	YPL131W
YHL033C	RPL8A	YHL033C
YGL147C	RPL9A	YGL147C
YOL039W	RPP2A	YOL039W
YML063W	RPS1B	YML063W
YOR167C	RPS28A	YOR167C
YER043C	SAH1	YER043C
YDR502C	SAM2	YDR502C
YKL117W	SBA1	YKL117W
YHL034C	SBP1	YHL034C
YDR077W	SED1	YDR077W
YLR058C	SHM2	YLR058C
YPR069C	SPE3	YPR069C
YAL005C	SSA1	YAL005C
YDL229W	SSB1	YDL229W
YPL106C	SSE1	YPL106C
YDR086C	SSS1	YDR086C
YJR007W	SUI2	YJR007W
YBR143C	SUP45	YBR143C
YPL048W	CAM1	YPL048W
YCR053W	THR4	YCR053W
YMR260C	TIF11	YMR260C
YJL138C	TIF2	YJL138C
YDR353W	TRR1	YDR353W
YGR209C	TRX2	YGR209C
YBR127C	VMA2	YBR127C
YAL035W	FUN12	YAL035W
YBR025C	non	YBR025C
YNL064C	YDJ1	YNL064C
YDR032C	PST2	YDR032C
YDR033W	MRH1	YDR033W
YDR233C	RTN1	YDR233C
YLR249W	YEF3	YLR249W
YER030W	CHZ1	YER030W
YER126C	NSA2	YER126C
YHR049W	FSH1	YHR049W
GO Enrichments
Process
GOID	GO_term	Cluster frequency	Background frequency	P-value	Gene(s) annotated to the term	Directly Annotated GOID List
44237	cellular metabolic process	85 out of 98 genes, 86.7%	3429 out of 7288 background genes, 47.0%	7.15e-14	SSA1:CYS3:FUN12:CDC19:ILS1:ATP3:HSP26:GRS1:SUP45:PGI1:ARO4:PGK1:THR4:NHP2:SSB1:BMH2:HOM2:TRR1:EFT2:GUK1:SAM2:RPL12A:CHZ1:SAH1:HOR2:MET6:NSA2:PAB1:BMH1:HSP12:OLE1:ARC1:RPL1B:RPL9A:HXK2:ACB1:ERG25:NSR1:RNR4:TRX2:PFK1:RPL8A:SBP1:ERG11:SSZ1:DYS1:LYS12:TIF2:SUI2:ATP2:HOM6:FBA1:SBA1:SHM2:SIK1:YEF3:RPS1B:ERG13:ERG5:HSC82:PFK2:RPL20A:TIF11:PBI2:POR1:YDJ1:LYS9:RPP2A:CDC33:RPL3:RPS28A:BFR1:RPB10:CAF20:NOP5…	15986:8295:6006:74:6114:6696:77:51083:103:18065:43248:19878:6260:6261:6409:6338:9060:1321:6446:30503:6730:6448:6626:184:30433:6555:723:30437:16071:6013:6950:84:5975:5977:46015:42273:6888:16259:6412:6413:6414:6090:6415:19413:1:6418:6094:6450:42493:154:11:6096:6631:19346:6098:1402:6633:6811:6383:6457:9073:6458:6636:42026:6566:910:45944:7005:6890:32445:96:30489:45047:6897:6353:6426:7155:1302:30162:6…
8152	metabolic process	85 out of 98 genes, 86.7%	3509 out of 7288 background genes, 48.1%	3.99e-13	SSA1:CYS3:FUN12:CDC19:ILS1:ATP3:HSP26:GRS1:SUP45:PGI1:ARO4:PGK1:THR4:NHP2:SSB1:BMH2:HOM2:TRR1:EFT2:GUK1:SAM2:RPL12A:CHZ1:SAH1:HOR2:MET6:NSA2:PAB1:BMH1:HSP12:OLE1:ARC1:RPL1B:RPL9A:HXK2:ACB1:ERG25:NSR1:RNR4:TRX2:PFK1:RPL8A:SBP1:ERG11:SSZ1:DYS1:LYS12:TIF2:SUI2:ATP2:HOM6:FBA1:SBA1:SHM2:SIK1:YEF3:RPS1B:ERG13:ERG5:HSC82:PFK2:RPL20A:TIF11:PBI2:POR1:YDJ1:LYS9:RPP2A:CDC33:RPL3:RPS28A:BFR1:RPB10:CAF20:NOP5…	15986:8295:6006:74:6114:6696:77:51083:103:18065:43248:19878:6260:6261:6409:6338:9060:1321:6446:30503:6730:6448:6626:184:30433:6555:723:30437:16071:6013:6950:84:5975:5977:46015:42273:6888:16259:6412:6413:6414:6090:6415:19413:1:6418:6450:6094:154:42493:11:6096:6631:1402:6098:19346:6633:6811:6383:9073:6457:6458:6636:42026:6566:910:45944:7005:6890:32445:96:30489:45047:6897:7155:6353:6426:1302:30162:6…
9058	biosynthetic process	50 out of 98 genes, 51.0%	1220 out of 7288 background genes, 16.7%	1.9e-12	SSA1:FUN12:ILS1:ATP3:GRS1:SUP45:PGI1:ARO4:PGK1:SSB1:HOM2:EFT2:RPL12A:HOR2:MET6:PAB1:ARC1:RPL1B:RPL9A:ERG25:RPL8A:ERG11:SSZ1:DYS1:LYS12:TIF2:SUI2:ATP2:HOM6:FBA1:YEF3:RPS1B:ERG13:ERG5:RPL20A:TIF11:LYS9:RPP2A:CDC33:RPL3:RPS28A:CAF20:GDH1:ERG10:CAM1:ALD6:RPL5:FAS2:SPE3:RPL11A	15986:8295:74:6114:6696:51083:18065:19878:6409:1321:6446:6448:6626:184:6555:723:6950:5975:6412:6413:6414:6415:19413:6418:6450:6094:42493:6096:6098:6633:9073:6457:42026:6566:910:6353:6426:6537:27:9085:60:9086:6970:42254:17148:15940:6616:8612:9090
44238	primary metabolic process	80 out of 98 genes, 81.6%	3207 out of 7288 background genes, 44.0%	6.96e-12	SSA1:CYS3:FUN12:CDC19:ILS1:ATP3:HSP26:GRS1:SUP45:PGI1:ARO4:PGK1:THR4:NHP2:SSB1:BMH2:HOM2:EFT2:GUK1:SAM2:RPL12A:CHZ1:SAH1:HOR2:MET6:NSA2:PAB1:BMH1:OLE1:ARC1:RPL1B:RPL9A:HXK2:ACB1:ERG25:NSR1:RNR4:TRX2:PFK1:RPL8A:SBP1:ERG11:SSZ1:DYS1:LYS12:TIF2:SUI2:ATP2:HOM6:FBA1:SBA1:SIK1:YEF3:RPS1B:ERG13:ERG5:HSC82:PFK2:RPL20A:TIF11:PBI2:YDJ1:LYS9:RPP2A:CDC33:RPL3:RPS28A:BFR1:RPB10:CAF20:NOP58:GDH1:ERG10:CAM1:SSE…	15986:8295:6006:74:6114:6696:77:51083:103:18065:43248:19878:6260:6261:6409:6338:1321:30503:6446:6448:6626:184:30433:6555:723:30437:16071:6013:6950:84:5975:5977:46015:42273:6888:16259:6412:6413:6414:6090:6415:1:6418:6450:6094:154:42493:11:6096:6631:1402:6098:19346:6633:6383:9073:6457:6458:6636:42026:6566:910:45944:6890:32445:96:30489:45047:6897:6353:6426:1302:30162:6534:6357:7265:6359:6537:7088:27…
44249	cellular biosynthetic process	45 out of 98 genes, 45.9%	1143 out of 7288 background genes, 15.7%	5.08e-10	SSA1:FUN12:ILS1:ATP3:GRS1:SUP45:PGI1:ARO4:PGK1:SSB1:HOM2:EFT2:RPL12A:HOR2:MET6:PAB1:ARC1:RPL1B:RPL9A:RPL8A:SSZ1:DYS1:LYS12:TIF2:SUI2:ATP2:HOM6:FBA1:YEF3:RPS1B:RPL20A:TIF11:LYS9:RPP2A:CDC33:RPL3:RPS28A:CAF20:GDH1:CAM1:ALD6:RPL5:FAS2:SPE3:RPL11A	15986:8295:74:6114:51083:18065:19878:6409:1321:6446:6448:6626:184:6555:723:6950:5975:6412:6413:6414:6415:19413:6418:6450:6094:42493:6096:6098:6633:9073:6457:42026:6566:910:6353:6426:6537:27:9085:60:9086:6970:42254:17148:15940:6616:8612:9090
9987	cellular process	91 out of 98 genes, 92.9%	4701 out of 7288 background genes, 64.5%	1.96e-08	SSA1:CYS3:FUN12:CDC19:ILS1:ATP3:HSP26:PHO88:GRS1:VMA2:SUP45:PGI1:ARO4:PGK1:THR4:NHP2:SSB1:SED1:SSS1:BMH2:HOM2:TRR1:EFT2:NPL3:GUK1:SAM2:RPL12A:CHZ1:SAH1:HOR2:MET6:KAP123:NSA2:PAB1:BMH1:HSP12:OLE1:ARC1:RPL1B:RPL9A:HXK2:ACB1:ERG25:NSR1:RNR4:TRX2:PFK1:RPL8A:SBP1:ERG11:SSZ1:DYS1:LYS12:TIF2:SUI2:ATP2:HOM6:FBA1:SBA1:SHM2:SIK1:YEF3:RPS1B:ERG13:ERG5:HSC82:PFK2:RPL20A:TIF11:PBI2:POR1:YDJ1:LYS9:RPP2A:CDC33:…	15986:8295:6006:74:6114:6696:77:51083:6874:103:18065:43248:19878:6260:6406:6261:6409:6620:6338:9060:1321:6446:30503:6730:6448:6626:184:30433:6555:30437:723:16071:6013:6950:84:5975:5977:46015:42273:7035:6888:16259:6412:6413:6414:6090:6415:19413:1:2:6418:31204:6450:6094:154:42493:11:6096:6631:1402:6098:19346:6633:6811:6383:9073:6457:6458:6636:42026:6566:6817:910:45944:7005:6890:32445:96:30489:45047…
19752	carboxylic acid metabolic process	21 out of 98 genes, 21.4%	308 out of 7288 background genes, 4.2%	2.17e-07	CYS3:CDC19:GRS1:PGI1:ARO4:PGK1:THR4:HOM2:SAM2:SAH1:MET6:OLE1:ARC1:ACB1:LYS12:HOM6:FBA1:LYS9:GDH1:ALD6:FAS2	18065:19878:6409:6555:16259:6090:19413:1:6418:6094:42493:6096:6631:6098:19346:6633:9073:6636:6566:96:6897:6353:6426:6534:6537:9085:9086:15909:9090
6082	organic acid metabolic process	21 out of 98 genes, 21.4%	308 out of 7288 background genes, 4.2%	2.17e-07	CYS3:CDC19:GRS1:PGI1:ARO4:PGK1:THR4:HOM2:SAM2:SAH1:MET6:OLE1:ARC1:ACB1:LYS12:HOM6:FBA1:LYS9:GDH1:ALD6:FAS2	18065:19878:6409:6555:16259:6090:19413:1:6418:6094:42493:6096:6631:6098:19346:6633:9073:6636:6566:96:6897:6353:6426:6534:6537:9085:9086:15909:9090
6096	glycolysis	7 out of 98 genes, 7.1%	24 out of 7288 background genes, 0.3%	8.53e-06	CDC19:PGI1:PGK1:HXK2:PFK1:FBA1:PFK2	6006:6013:46015:6090:6094:6096:6098:32445:1302:46323:8361:6000
6412	translation	28 out of 98 genes, 28.6%	684 out of 7288 background genes, 9.4%	2.04e-05	SSA1:FUN12:ILS1:GRS1:SUP45:SSB1:EFT2:RPL12A:PAB1:ARC1:RPL1B:RPL9A:RPL8A:SSZ1:TIF2:SUI2:YEF3:RPS1B:RPL20A:TIF11:RPP2A:CDC33:RPL3:RPS28A:CAF20:CAM1:RPL5:RPL11A	74:51083:6409:6446:6448:6626:184:723:6950:6412:6413:6414:6415:6418:6450:6457:42026:910:6353:6426:27:60:42254:17148:6616
6519	amino acid and derivative metabolic process	15 out of 98 genes, 15.3%	200 out of 7288 background genes, 2.7%	2.54e-05	CYS3:GRS1:ARO4:THR4:HOM2:SAM2:SAH1:MET6:ARC1:DYS1:LYS12:HOM6:LYS9:GDH1:SPE3	8295:19878:6409:6555:16259:6418:42493:19346:9073:6566:96:6897:6353:6426:6534:6537:9085:9086:15940:8612:9090
9066	aspartate family amino acid metabolic process	8 out of 98 genes, 8.2%	45 out of 7288 background genes, 0.6%	5.31e-05	THR4:HOM2:SAM2:SAH1:MET6:LYS12:HOM6:LYS9	19878:6555:16259:42493:6566:6897:9085:9086:9090
9059	macromolecule biosynthetic process	31 out of 98 genes, 31.6%	872 out of 7288 background genes, 12.0%	8.11e-05	SSA1:FUN12:ILS1:GRS1:SUP45:PGI1:PGK1:SSB1:EFT2:RPL12A:PAB1:ARC1:RPL1B:RPL9A:RPL8A:SSZ1:TIF2:SUI2:FBA1:YEF3:RPS1B:RPL20A:TIF11:RPP2A:CDC33:RPL3:RPS28A:CAF20:CAM1:RPL5:RPL11A	74:51083:6409:6446:6448:6626:184:723:6950:6412:6413:6414:6415:6418:6450:6094:6096:6098:6457:42026:910:6353:6426:27:60:42254:17148:6616
6066	alcohol metabolic process	13 out of 98 genes, 13.3%	163 out of 7288 background genes, 2.2%	0.0001	CDC19:PGI1:PGK1:HOR2:HXK2:ERG25:PFK1:ERG11:FBA1:ERG13:ERG5:PFK2:ERG10	6006:6114:6696:6013:5975:46015:6090:6094:6096:6098:32445:1302:6970:46323:8361:6000
6007	glucose catabolic process	7 out of 98 genes, 7.1%	34 out of 7288 background genes, 0.5%	0.00011	CDC19:PGI1:PGK1:HXK2:PFK1:FBA1:PFK2	6006:6013:46015:6090:6094:6096:6098:32445:1302:46323:8361:6000
19320	hexose catabolic process	7 out of 98 genes, 7.1%	37 out of 7288 background genes, 0.5%	0.00021	CDC19:PGI1:PGK1:HXK2:PFK1:FBA1:PFK2	6006:6013:46015:6090:6094:6096:6098:32445:1302:46323:8361:6000
6520	amino acid metabolic process	13 out of 98 genes, 13.3%	185 out of 7288 background genes, 2.5%	0.00045	CYS3:GRS1:ARO4:THR4:HOM2:SAM2:SAH1:MET6:ARC1:LYS12:HOM6:LYS9:GDH1	19878:6409:6555:16259:6418:42493:19346:9073:6566:96:6897:6353:6426:6534:6537:9085:9086:9090
46365	monosaccharide catabolic process	7 out of 98 genes, 7.1%	42 out of 7288 background genes, 0.6%	0.00054	CDC19:PGI1:PGK1:HXK2:PFK1:FBA1:PFK2	6006:6013:46015:6090:6094:6096:6098:32445:1302:46323:8361:6000
9308	amine metabolic process	14 out of 98 genes, 14.3%	223 out of 7288 background genes, 3.1%	0.00065	CYS3:GRS1:ARO4:THR4:HOM2:SAM2:SAH1:MET6:ARC1:LYS12:HOM6:LYS9:GDH1:SPE3	8295:19878:6409:6555:16259:6418:42493:19346:9073:6566:96:6897:6353:6426:6534:6537:9085:9086:15940:9090
46164	alcohol catabolic process	7 out of 98 genes, 7.1%	45 out of 7288 background genes, 0.6%	0.00088	CDC19:PGI1:PGK1:HXK2:PFK1:FBA1:PFK2	6006:6013:46015:6090:6094:6096:6098:32445:1302:46323:8361:6000
22618	protein-RNA complex assembly	11 out of 98 genes, 11.2%	140 out of 7288 background genes, 1.9%	0.0011	FUN12:RPL12A:PAB1:NSR1:TIF2:SUI2:TIF11:CDC33:RPL3:RPL5:RPL11A	74:6446:184:723:6412:6413:27:28:6364
96	sulfur amino acid metabolic process	6 out of 98 genes, 6.1%	32 out of 7288 background genes, 0.4%	0.0016	CYS3:HOM2:SAM2:SAH1:MET6:HOM6	6555:16259:42493:19346:6566:96:6534:9086:9090
42026	protein refolding	4 out of 98 genes, 4.1%	9 out of 7288 background genes, 0.1%	0.0017	SSA1:HSC82:YDJ1:SSE1	43248:6626:30433:723:6950:6412:42493:6457:6458:42026:45047:60:6616
6807	nitrogen compound metabolic process	14 out of 98 genes, 14.3%	244 out of 7288 background genes, 3.3%	0.00188	CYS3:GRS1:ARO4:THR4:HOM2:SAM2:SAH1:MET6:ARC1:LYS12:HOM6:LYS9:GDH1:SPE3	8295:19878:6409:6555:16259:6418:42493:19346:9073:6566:96:6897:6353:6426:6534:6537:9085:9086:15940:9090
6555	methionine metabolic process	5 out of 98 genes, 5.1%	23 out of 7288 background genes, 0.3%	0.00511	HOM2:SAM2:SAH1:MET6:HOM6	6555:16259:42493:6566:9086:9090
6417	regulation of translation	6 out of 98 genes, 6.1%	42 out of 7288 background genes, 0.6%	0.00834	SSB1:PAB1:SSZ1:TIF2:CAF20:CAM1	51083:6446:6448:6412:6413:6450:17148
22613	ribonucleoprotein complex biogenesis and assembly	17 out of 98 genes, 17.3%	400 out of 7288 background genes, 5.5%	0.00922	FUN12:NHP2:RPL12A:NSA2:PAB1:NSR1:SBP1:TIF2:SUI2:SIK1:YEF3:TIF11:CDC33:RPL3:NOP58:RPL5:RPL11A	74:6446:184:723:42273:6412:6413:6414:154:30489:27:28:30490:42254:6364:31118:6365
6696	ergosterol biosynthetic process	5 out of 98 genes, 5.1%	26 out of 7288 background genes, 0.4%	0.00968	ERG25:ERG11:ERG13:ERG5:ERG10	6696
8204	ergosterol metabolic process	5 out of 98 genes, 5.1%	26 out of 7288 background genes, 0.4%	0.00968	ERG25:ERG11:ERG13:ERG5:ERG10	6696
6006	glucose metabolic process	7 out of 98 genes, 7.1%	64 out of 7288 background genes, 0.9%	0.00987	CDC19:PGI1:PGK1:HXK2:PFK1:FBA1:PFK2	6006:6013:46015:6090:6094:6096:6098:32445:1302:46323:8361:6000
Function
GOID	GO_term	Cluster frequency	Background frequency	P-value	Gene(s) annotated to the term	Directly Annotated GOID List
44237	cellular metabolic process	85 out of 98 genes, 86.7%	3429 out of 7288 background genes, 47.0%	7.15e-14	SSA1:CYS3:FUN12:CDC19:ILS1:ATP3:HSP26:GRS1:SUP45:PGI1:ARO4:PGK1:THR4:NHP2:SSB1:BMH2:HOM2:TRR1:EFT2:GUK1:SAM2:RPL12A:CHZ1:SAH1:HOR2:MET6:NSA2:PAB1:BMH1:HSP12:OLE1:ARC1:RPL1B:RPL9A:HXK2:ACB1:ERG25:NSR1:RNR4:TRX2:PFK1:RPL8A:SBP1:ERG11:SSZ1:DYS1:LYS12:TIF2:SUI2:ATP2:HOM6:FBA1:SBA1:SHM2:SIK1:YEF3:RPS1B:ERG13:ERG5:HSC82:PFK2:RPL20A:TIF11:PBI2:POR1:YDJ1:LYS9:RPP2A:CDC33:RPL3:RPS28A:BFR1:RPB10:CAF20:NOP5…	15986:8295:6006:74:6114:6696:77:51083:103:18065:43248:19878:6260:6261:6409:6338:9060:1321:6446:30503:6730:6448:6626:184:30433:6555:723:30437:16071:6013:6950:84:5975:5977:46015:42273:6888:16259:6412:6413:6414:6090:6415:19413:1:6418:6094:6450:42493:154:11:6096:6631:19346:6098:1402:6633:6811:6383:6457:9073:6458:6636:42026:6566:910:45944:7005:6890:32445:96:30489:45047:6897:6353:6426:7155:1302:30162:6…
8152	metabolic process	85 out of 98 genes, 86.7%	3509 out of 7288 background genes, 48.1%	3.99e-13	SSA1:CYS3:FUN12:CDC19:ILS1:ATP3:HSP26:GRS1:SUP45:PGI1:ARO4:PGK1:THR4:NHP2:SSB1:BMH2:HOM2:TRR1:EFT2:GUK1:SAM2:RPL12A:CHZ1:SAH1:HOR2:MET6:NSA2:PAB1:BMH1:HSP12:OLE1:ARC1:RPL1B:RPL9A:HXK2:ACB1:ERG25:NSR1:RNR4:TRX2:PFK1:RPL8A:SBP1:ERG11:SSZ1:DYS1:LYS12:TIF2:SUI2:ATP2:HOM6:FBA1:SBA1:SHM2:SIK1:YEF3:RPS1B:ERG13:ERG5:HSC82:PFK2:RPL20A:TIF11:PBI2:POR1:YDJ1:LYS9:RPP2A:CDC33:RPL3:RPS28A:BFR1:RPB10:CAF20:NOP5…	15986:8295:6006:74:6114:6696:77:51083:103:18065:43248:19878:6260:6261:6409:6338:9060:1321:6446:30503:6730:6448:6626:184:30433:6555:723:30437:16071:6013:6950:84:5975:5977:46015:42273:6888:16259:6412:6413:6414:6090:6415:19413:1:6418:6450:6094:154:42493:11:6096:6631:1402:6098:19346:6633:6811:6383:9073:6457:6458:6636:42026:6566:910:45944:7005:6890:32445:96:30489:45047:6897:7155:6353:6426:1302:30162:6…
9058	biosynthetic process	50 out of 98 genes, 51.0%	1220 out of 7288 background genes, 16.7%	1.9e-12	SSA1:FUN12:ILS1:ATP3:GRS1:SUP45:PGI1:ARO4:PGK1:SSB1:HOM2:EFT2:RPL12A:HOR2:MET6:PAB1:ARC1:RPL1B:RPL9A:ERG25:RPL8A:ERG11:SSZ1:DYS1:LYS12:TIF2:SUI2:ATP2:HOM6:FBA1:YEF3:RPS1B:ERG13:ERG5:RPL20A:TIF11:LYS9:RPP2A:CDC33:RPL3:RPS28A:CAF20:GDH1:ERG10:CAM1:ALD6:RPL5:FAS2:SPE3:RPL11A	15986:8295:74:6114:6696:51083:18065:19878:6409:1321:6446:6448:6626:184:6555:723:6950:5975:6412:6413:6414:6415:19413:6418:6450:6094:42493:6096:6098:6633:9073:6457:42026:6566:910:6353:6426:6537:27:9085:60:9086:6970:42254:17148:15940:6616:8612:9090
44238	primary metabolic process	80 out of 98 genes, 81.6%	3207 out of 7288 background genes, 44.0%	6.96e-12	SSA1:CYS3:FUN12:CDC19:ILS1:ATP3:HSP26:GRS1:SUP45:PGI1:ARO4:PGK1:THR4:NHP2:SSB1:BMH2:HOM2:EFT2:GUK1:SAM2:RPL12A:CHZ1:SAH1:HOR2:MET6:NSA2:PAB1:BMH1:OLE1:ARC1:RPL1B:RPL9A:HXK2:ACB1:ERG25:NSR1:RNR4:TRX2:PFK1:RPL8A:SBP1:ERG11:SSZ1:DYS1:LYS12:TIF2:SUI2:ATP2:HOM6:FBA1:SBA1:SIK1:YEF3:RPS1B:ERG13:ERG5:HSC82:PFK2:RPL20A:TIF11:PBI2:YDJ1:LYS9:RPP2A:CDC33:RPL3:RPS28A:BFR1:RPB10:CAF20:NOP58:GDH1:ERG10:CAM1:SSE…	15986:8295:6006:74:6114:6696:77:51083:103:18065:43248:19878:6260:6261:6409:6338:1321:30503:6446:6448:6626:184:30433:6555:723:30437:16071:6013:6950:84:5975:5977:46015:42273:6888:16259:6412:6413:6414:6090:6415:1:6418:6450:6094:154:42493:11:6096:6631:1402:6098:19346:6633:6383:9073:6457:6458:6636:42026:6566:910:45944:6890:32445:96:30489:45047:6897:6353:6426:1302:30162:6534:6357:7265:6359:6537:7088:27…
44249	cellular biosynthetic process	45 out of 98 genes, 45.9%	1143 out of 7288 background genes, 15.7%	5.08e-10	SSA1:FUN12:ILS1:ATP3:GRS1:SUP45:PGI1:ARO4:PGK1:SSB1:HOM2:EFT2:RPL12A:HOR2:MET6:PAB1:ARC1:RPL1B:RPL9A:RPL8A:SSZ1:DYS1:LYS12:TIF2:SUI2:ATP2:HOM6:FBA1:YEF3:RPS1B:RPL20A:TIF11:LYS9:RPP2A:CDC33:RPL3:RPS28A:CAF20:GDH1:CAM1:ALD6:RPL5:FAS2:SPE3:RPL11A	15986:8295:74:6114:51083:18065:19878:6409:1321:6446:6448:6626:184:6555:723:6950:5975:6412:6413:6414:6415:19413:6418:6450:6094:42493:6096:6098:6633:9073:6457:42026:6566:910:6353:6426:6537:27:9085:60:9086:6970:42254:17148:15940:6616:8612:9090
9987	cellular process	91 out of 98 genes, 92.9%	4701 out of 7288 background genes, 64.5%	1.96e-08	SSA1:CYS3:FUN12:CDC19:ILS1:ATP3:HSP26:PHO88:GRS1:VMA2:SUP45:PGI1:ARO4:PGK1:THR4:NHP2:SSB1:SED1:SSS1:BMH2:HOM2:TRR1:EFT2:NPL3:GUK1:SAM2:RPL12A:CHZ1:SAH1:HOR2:MET6:KAP123:NSA2:PAB1:BMH1:HSP12:OLE1:ARC1:RPL1B:RPL9A:HXK2:ACB1:ERG25:NSR1:RNR4:TRX2:PFK1:RPL8A:SBP1:ERG11:SSZ1:DYS1:LYS12:TIF2:SUI2:ATP2:HOM6:FBA1:SBA1:SHM2:SIK1:YEF3:RPS1B:ERG13:ERG5:HSC82:PFK2:RPL20A:TIF11:PBI2:POR1:YDJ1:LYS9:RPP2A:CDC33:…	15986:8295:6006:74:6114:6696:77:51083:6874:103:18065:43248:19878:6260:6406:6261:6409:6620:6338:9060:1321:6446:30503:6730:6448:6626:184:30433:6555:30437:723:16071:6013:6950:84:5975:5977:46015:42273:7035:6888:16259:6412:6413:6414:6090:6415:19413:1:2:6418:31204:6450:6094:154:42493:11:6096:6631:1402:6098:19346:6633:6811:6383:9073:6457:6458:6636:42026:6566:6817:910:45944:7005:6890:32445:96:30489:45047…
19752	carboxylic acid metabolic process	21 out of 98 genes, 21.4%	308 out of 7288 background genes, 4.2%	2.17e-07	CYS3:CDC19:GRS1:PGI1:ARO4:PGK1:THR4:HOM2:SAM2:SAH1:MET6:OLE1:ARC1:ACB1:LYS12:HOM6:FBA1:LYS9:GDH1:ALD6:FAS2	18065:19878:6409:6555:16259:6090:19413:1:6418:6094:42493:6096:6631:6098:19346:6633:9073:6636:6566:96:6897:6353:6426:6534:6537:9085:9086:15909:9090
6082	organic acid metabolic process	21 out of 98 genes, 21.4%	308 out of 7288 background genes, 4.2%	2.17e-07	CYS3:CDC19:GRS1:PGI1:ARO4:PGK1:THR4:HOM2:SAM2:SAH1:MET6:OLE1:ARC1:ACB1:LYS12:HOM6:FBA1:LYS9:GDH1:ALD6:FAS2	18065:19878:6409:6555:16259:6090:19413:1:6418:6094:42493:6096:6631:6098:19346:6633:9073:6636:6566:96:6897:6353:6426:6534:6537:9085:9086:15909:9090
6096	glycolysis	7 out of 98 genes, 7.1%	24 out of 7288 background genes, 0.3%	8.53e-06	CDC19:PGI1:PGK1:HXK2:PFK1:FBA1:PFK2	6006:6013:46015:6090:6094:6096:6098:32445:1302:46323:8361:6000
6412	translation	28 out of 98 genes, 28.6%	684 out of 7288 background genes, 9.4%	2.04e-05	SSA1:FUN12:ILS1:GRS1:SUP45:SSB1:EFT2:RPL12A:PAB1:ARC1:RPL1B:RPL9A:RPL8A:SSZ1:TIF2:SUI2:YEF3:RPS1B:RPL20A:TIF11:RPP2A:CDC33:RPL3:RPS28A:CAF20:CAM1:RPL5:RPL11A	74:51083:6409:6446:6448:6626:184:723:6950:6412:6413:6414:6415:6418:6450:6457:42026:910:6353:6426:27:60:42254:17148:6616
6519	amino acid and derivative metabolic process	15 out of 98 genes, 15.3%	200 out of 7288 background genes, 2.7%	2.54e-05	CYS3:GRS1:ARO4:THR4:HOM2:SAM2:SAH1:MET6:ARC1:DYS1:LYS12:HOM6:LYS9:GDH1:SPE3	8295:19878:6409:6555:16259:6418:42493:19346:9073:6566:96:6897:6353:6426:6534:6537:9085:9086:15940:8612:9090
9066	aspartate family amino acid metabolic process	8 out of 98 genes, 8.2%	45 out of 7288 background genes, 0.6%	5.31e-05	THR4:HOM2:SAM2:SAH1:MET6:LYS12:HOM6:LYS9	19878:6555:16259:42493:6566:6897:9085:9086:9090
9059	macromolecule biosynthetic process	31 out of 98 genes, 31.6%	872 out of 7288 background genes, 12.0%	8.11e-05	SSA1:FUN12:ILS1:GRS1:SUP45:PGI1:PGK1:SSB1:EFT2:RPL12A:PAB1:ARC1:RPL1B:RPL9A:RPL8A:SSZ1:TIF2:SUI2:FBA1:YEF3:RPS1B:RPL20A:TIF11:RPP2A:CDC33:RPL3:RPS28A:CAF20:CAM1:RPL5:RPL11A	74:51083:6409:6446:6448:6626:184:723:6950:6412:6413:6414:6415:6418:6450:6094:6096:6098:6457:42026:910:6353:6426:27:60:42254:17148:6616
6066	alcohol metabolic process	13 out of 98 genes, 13.3%	163 out of 7288 background genes, 2.2%	0.0001	CDC19:PGI1:PGK1:HOR2:HXK2:ERG25:PFK1:ERG11:FBA1:ERG13:ERG5:PFK2:ERG10	6006:6114:6696:6013:5975:46015:6090:6094:6096:6098:32445:1302:6970:46323:8361:6000
6007	glucose catabolic process	7 out of 98 genes, 7.1%	34 out of 7288 background genes, 0.5%	0.00011	CDC19:PGI1:PGK1:HXK2:PFK1:FBA1:PFK2	6006:6013:46015:6090:6094:6096:6098:32445:1302:46323:8361:6000
19320	hexose catabolic process	7 out of 98 genes, 7.1%	37 out of 7288 background genes, 0.5%	0.00021	CDC19:PGI1:PGK1:HXK2:PFK1:FBA1:PFK2	6006:6013:46015:6090:6094:6096:6098:32445:1302:46323:8361:6000
6520	amino acid metabolic process	13 out of 98 genes, 13.3%	185 out of 7288 background genes, 2.5%	0.00045	CYS3:GRS1:ARO4:THR4:HOM2:SAM2:SAH1:MET6:ARC1:LYS12:HOM6:LYS9:GDH1	19878:6409:6555:16259:6418:42493:19346:9073:6566:96:6897:6353:6426:6534:6537:9085:9086:9090
46365	monosaccharide catabolic process	7 out of 98 genes, 7.1%	42 out of 7288 background genes, 0.6%	0.00054	CDC19:PGI1:PGK1:HXK2:PFK1:FBA1:PFK2	6006:6013:46015:6090:6094:6096:6098:32445:1302:46323:8361:6000
9308	amine metabolic process	14 out of 98 genes, 14.3%	223 out of 7288 background genes, 3.1%	0.00065	CYS3:GRS1:ARO4:THR4:HOM2:SAM2:SAH1:MET6:ARC1:LYS12:HOM6:LYS9:GDH1:SPE3	8295:19878:6409:6555:16259:6418:42493:19346:9073:6566:96:6897:6353:6426:6534:6537:9085:9086:15940:9090
46164	alcohol catabolic process	7 out of 98 genes, 7.1%	45 out of 7288 background genes, 0.6%	0.00088	CDC19:PGI1:PGK1:HXK2:PFK1:FBA1:PFK2	6006:6013:46015:6090:6094:6096:6098:32445:1302:46323:8361:6000
22618	protein-RNA complex assembly	11 out of 98 genes, 11.2%	140 out of 7288 background genes, 1.9%	0.0011	FUN12:RPL12A:PAB1:NSR1:TIF2:SUI2:TIF11:CDC33:RPL3:RPL5:RPL11A	74:6446:184:723:6412:6413:27:28:6364
96	sulfur amino acid metabolic process	6 out of 98 genes, 6.1%	32 out of 7288 background genes, 0.4%	0.0016	CYS3:HOM2:SAM2:SAH1:MET6:HOM6	6555:16259:42493:19346:6566:96:6534:9086:9090
42026	protein refolding	4 out of 98 genes, 4.1%	9 out of 7288 background genes, 0.1%	0.0017	SSA1:HSC82:YDJ1:SSE1	43248:6626:30433:723:6950:6412:42493:6457:6458:42026:45047:60:6616
6807	nitrogen compound metabolic process	14 out of 98 genes, 14.3%	244 out of 7288 background genes, 3.3%	0.00188	CYS3:GRS1:ARO4:THR4:HOM2:SAM2:SAH1:MET6:ARC1:LYS12:HOM6:LYS9:GDH1:SPE3	8295:19878:6409:6555:16259:6418:42493:19346:9073:6566:96:6897:6353:6426:6534:6537:9085:9086:15940:9090
6555	methionine metabolic process	5 out of 98 genes, 5.1%	23 out of 7288 background genes, 0.3%	0.00511	HOM2:SAM2:SAH1:MET6:HOM6	6555:16259:42493:6566:9086:9090
6417	regulation of translation	6 out of 98 genes, 6.1%	42 out of 7288 background genes, 0.6%	0.00834	SSB1:PAB1:SSZ1:TIF2:CAF20:CAM1	51083:6446:6448:6412:6413:6450:17148
22613	ribonucleoprotein complex biogenesis and assembly	17 out of 98 genes, 17.3%	400 out of 7288 background genes, 5.5%	0.00922	FUN12:NHP2:RPL12A:NSA2:PAB1:NSR1:SBP1:TIF2:SUI2:SIK1:YEF3:TIF11:CDC33:RPL3:NOP58:RPL5:RPL11A	74:6446:184:723:42273:6412:6413:6414:154:30489:27:28:30490:42254:6364:31118:6365
6696	ergosterol biosynthetic process	5 out of 98 genes, 5.1%	26 out of 7288 background genes, 0.4%	0.00968	ERG25:ERG11:ERG13:ERG5:ERG10	6696
8204	ergosterol metabolic process	5 out of 98 genes, 5.1%	26 out of 7288 background genes, 0.4%	0.00968	ERG25:ERG11:ERG13:ERG5:ERG10	6696
6006	glucose metabolic process	7 out of 98 genes, 7.1%	64 out of 7288 background genes, 0.9%	0.00987	CDC19:PGI1:PGK1:HXK2:PFK1:FBA1:PFK2	6006:6013:46015:6090:6094:6096:6098:32445:1302:46323:8361:6000
Component
GOID	GO_term	Cluster frequency	Background frequency	P-value	Gene(s) annotated to the term	Directly Annotated GOID List
44424	intracellular part	97 out of 98 genes, 99.0%	5052 out of 7288 background genes, 69.3%	1.17e-12	SSA1:CYS3:FUN12:CDC19:ILS1:YBR025C:ATP3:HSP26:PHO88:GRS1:VMA2:SUP45:PGI1:ARO4:PGK1:THR4:NHP2:SSB1:PST2:MRH1:SED1:SSS1:BMH2:HOM2:RTN1:TRR1:EFT2:NPL3:GUK1:RPL12A:CHZ1:SAH1:HOR2:MET6:KAP123:NSA2:PAB1:BMH1:HSP12:PMA1:OLE1:ARC1:RPL1B:RPL9A:HXK2:ACB1:ERG25:NSR1:RNR4:TRX2:PFK1:RPL8A:SBP1:ERG11:FSH1:SSZ1:DYS1:LYS12:TIF2:SUI2:MIR1:ATP2:HOM6:FBA1:SBA1:SHM2:SIK1:YEF3:RPS1B:ERG13:ERG5:HSC82:PFK2:RPL20A:TIF11…	5945:5678:5783:31428:5784:9277:48471:5789:42175:790:16281:30687:324:5730:18444:5625:5643:5732:31307:329:5840:5736:5842:5737:5665:5754:17102:5843:5666:5739:5844:5845:5829:5756:30529:5792:5971:5794:45121:5886:221:43614:5634:31206:5740:5830:5741:16020:5832:5850:5835
5622	intracellular	97 out of 98 genes, 99.0%	5087 out of 7288 background genes, 69.8%	2.27e-12	SSA1:CYS3:FUN12:CDC19:ILS1:YBR025C:ATP3:HSP26:PHO88:GRS1:VMA2:SUP45:PGI1:ARO4:PGK1:THR4:NHP2:SSB1:PST2:MRH1:SED1:SSS1:BMH2:HOM2:RTN1:TRR1:EFT2:NPL3:GUK1:RPL12A:CHZ1:SAH1:HOR2:MET6:KAP123:NSA2:PAB1:BMH1:HSP12:PMA1:OLE1:ARC1:RPL1B:RPL9A:HXK2:ACB1:ERG25:NSR1:RNR4:TRX2:PFK1:RPL8A:SBP1:ERG11:FSH1:SSZ1:DYS1:LYS12:TIF2:SUI2:MIR1:ATP2:HOM6:FBA1:SBA1:SHM2:SIK1:YEF3:RPS1B:ERG13:ERG5:HSC82:PFK2:RPL20A:TIF11…	5945:5678:5783:31428:5784:9277:48471:5789:42175:790:16281:30687:324:5730:5625:18444:5643:5732:31307:5840:329:5736:5842:5737:5665:5754:17102:5843:5666:5844:5739:5845:5756:5829:30529:5792:5971:5794:45121:5886:221:43614:31206:5634:5740:5830:5741:16020:5832:5850:5835
5737	cytoplasm	85 out of 98 genes, 86.7%	3694 out of 7288 background genes, 50.7%	5.17e-12	SSA1:CYS3:FUN12:CDC19:ILS1:YBR025C:ATP3:HSP26:PHO88:GRS1:VMA2:SUP45:PGI1:ARO4:PGK1:THR4:PST2:MRH1:SED1:SSS1:HOM2:RTN1:TRR1:EFT2:NPL3:GUK1:RPL12A:SAH1:HOR2:MET6:KAP123:NSA2:PAB1:HSP12:PMA1:OLE1:ARC1:RPL1B:RPL9A:HXK2:ACB1:ERG25:NSR1:RNR4:TRX2:PFK1:RPL8A:ERG11:FSH1:SSZ1:DYS1:LYS12:TIF2:SUI2:MIR1:ATP2:HOM6:FBA1:SBA1:SHM2:YEF3:RPS1B:ERG13:ERG5:HSC82:PFK2:RPL20A:TIF11:PBI2:POR1:YDJ1:LYS9:RPP2A:CDC33:RP…	5945:5783:5784:9277:48471:5789:16281:30687:5625:324:5730:18444:5643:31307:5840:329:5842:5737:5754:17102:5843:5739:5756:5829:5792:5971:5794:45121:5886:221:43614:31206:5634:5740:5830:5741:16020:5832:5850:5835
44464	cell part	97 out of 98 genes, 99.0%	5495 out of 7288 background genes, 75.4%	3.55e-09	SSA1:CYS3:FUN12:CDC19:ILS1:YBR025C:ATP3:HSP26:PHO88:GRS1:VMA2:SUP45:PGI1:ARO4:PGK1:THR4:NHP2:SSB1:PST2:MRH1:SED1:SSS1:BMH2:HOM2:RTN1:TRR1:EFT2:NPL3:GUK1:RPL12A:CHZ1:SAH1:HOR2:MET6:KAP123:NSA2:PAB1:BMH1:HSP12:PMA1:OLE1:ARC1:RPL1B:RPL9A:HXK2:ACB1:ERG25:NSR1:RNR4:TRX2:PFK1:RPL8A:SBP1:ERG11:FSH1:SSZ1:DYS1:LYS12:TIF2:SUI2:MIR1:ATP2:HOM6:FBA1:SBA1:SHM2:SIK1:YEF3:RPS1B:ERG13:ERG5:HSC82:PFK2:RPL20A:TIF11…	5945:5678:5783:31428:5784:9277:48471:5789:42175:790:16281:30687:324:5730:5625:18444:5643:5732:31307:5840:329:5736:5842:5737:5665:5754:17102:5843:5666:5844:5739:5845:5756:5829:30529:5792:5971:5794:45121:5886:221:43614:31206:5634:5740:5830:5741:16020:5832:5850:5835
44445	cytosolic part	16 out of 98 genes, 16.3%	197 out of 7288 background genes, 2.7%	8.18e-07	SSA1:FUN12:RPL12A:RPL1B:RPL9A:PFK1:RPL8A:RPS1B:PFK2:RPL20A:RPP2A:RPL3:RPS28A:CAM1:RPL5:RPL11A	5945:9277:329:5842:5737:5843:5739:5634:5830:5832
5840	ribosome	21 out of 98 genes, 21.4%	357 out of 7288 background genes, 4.9%	9.4e-07	FUN12:SED1:EFT2:RPL12A:PAB1:RPL1B:RPL9A:RPL8A:TIF2:SUI2:YEF3:RPS1B:RPL20A:TIF11:RPP2A:CDC33:RPL3:RPS28A:CAM1:RPL5:RPL11A	9277:16281:5840:5737:5842:5843:5739:43614:5634:5830:5850
30529	ribonucleoprotein complex	27 out of 98 genes, 27.6%	618 out of 7288 background genes, 8.5%	2.88e-06	FUN12:NHP2:SSB1:SED1:EFT2:RPL12A:NSA2:PAB1:RPL1B:RPL9A:RPL8A:TIF2:SUI2:SIK1:YEF3:RPS1B:RPL20A:TIF11:RPP2A:CDC33:RPL3:RPS28A:BFR1:NOP58:CAM1:RPL5:RPL11A	31428:9277:42175:16281:30687:5730:5625:5732:5840:5737:5842:5843:5844:5739:30529:43614:5634:5830:5850
5829	cytosol	26 out of 98 genes, 26.5%	617 out of 7288 background genes, 8.5%	1.18e-05	SSA1:FUN12:CDC19:ILS1:SUP45:PGI1:RPL12A:RPL1B:RPL9A:HXK2:TRX2:PFK1:RPL8A:FBA1:RPS1B:PFK2:RPL20A:YDJ1:RPP2A:RPL3:RPS28A:ERG10:CAM1:ALD6:RPL5:RPL11A	5945:9277:48471:324:18444:329:5842:5737:5843:5739:5829:5792:5634:5830:5832
43229	intracellular organelle	78 out of 98 genes, 79.6%	4021 out of 7288 background genes, 55.2%	4.4e-05	SSA1:FUN12:ATP3:HSP26:PHO88:GRS1:VMA2:PGI1:ARO4:PGK1:THR4:NHP2:PST2:MRH1:SED1:SSS1:BMH2:HOM2:RTN1:EFT2:NPL3:GUK1:RPL12A:CHZ1:HOR2:KAP123:NSA2:PAB1:BMH1:HSP12:PMA1:OLE1:RPL1B:RPL9A:HXK2:ACB1:ERG25:NSR1:RNR4:TRX2:PFK1:RPL8A:SBP1:ERG11:FSH1:LYS12:TIF2:SUI2:MIR1:ATP2:HOM6:FBA1:SBA1:SIK1:YEF3:RPS1B:ERG13:ERG5:HSC82:PFK2:RPL20A:TIF11:PBI2:POR1:RPP2A:CDC33:RPL3:RPS28A:RPB10:NOP58:GDH1:CAM1:ALD6:RPL5:FAS…	5945:5678:5783:31428:5784:9277:5789:790:16281:30687:5625:324:5730:5643:5732:31307:5840:329:5736:5842:5737:5665:5754:5843:5666:5739:5829:5756:5971:5794:45121:5886:221:43614:31206:5634:5740:5830:5741:16020:5832:5850:5835
43226	organelle	78 out of 98 genes, 79.6%	4022 out of 7288 background genes, 55.2%	4.46e-05	SSA1:FUN12:ATP3:HSP26:PHO88:GRS1:VMA2:PGI1:ARO4:PGK1:THR4:NHP2:PST2:MRH1:SED1:SSS1:BMH2:HOM2:RTN1:EFT2:NPL3:GUK1:RPL12A:CHZ1:HOR2:KAP123:NSA2:PAB1:BMH1:HSP12:PMA1:OLE1:RPL1B:RPL9A:HXK2:ACB1:ERG25:NSR1:RNR4:TRX2:PFK1:RPL8A:SBP1:ERG11:FSH1:LYS12:TIF2:SUI2:MIR1:ATP2:HOM6:FBA1:SBA1:SIK1:YEF3:RPS1B:ERG13:ERG5:HSC82:PFK2:RPL20A:TIF11:PBI2:POR1:RPP2A:CDC33:RPL3:RPS28A:RPB10:NOP58:GDH1:CAM1:ALD6:RPL5:FAS…	5945:5678:5783:31428:5784:9277:5789:790:16281:30687:5625:324:5730:5643:5732:31307:5840:329:5736:5842:5737:5665:5754:5843:5666:5739:5829:5756:5971:5794:45121:5886:221:43614:31206:5634:5740:5830:5741:16020:5832:5850:5835
5830	cytosolic ribosome (sensu Eukaryota)	13 out of 98 genes, 13.3%	176 out of 7288 background genes, 2.4%	7.51e-05	FUN12:RPL12A:RPL1B:RPL9A:RPL8A:RPS1B:RPL20A:RPP2A:RPL3:RPS28A:CAM1:RPL5:RPL11A	5842:5843:5739:5830
44444	cytoplasmic part	59 out of 98 genes, 60.2%	2700 out of 7288 background genes, 37.0%	0.00032	SSA1:FUN12:CDC19:ILS1:ATP3:PHO88:GRS1:VMA2:SUP45:PGI1:PGK1:PST2:MRH1:SED1:SSS1:RTN1:EFT2:RPL12A:NSA2:PAB1:PMA1:OLE1:RPL1B:RPL9A:HXK2:ERG25:NSR1:RNR4:TRX2:PFK1:RPL8A:ERG11:LYS12:TIF2:SUI2:MIR1:ATP2:FBA1:YEF3:RPS1B:ERG13:ERG5:HSC82:PFK2:RPL20A:TIF11:PBI2:POR1:YDJ1:RPP2A:CDC33:RPL3:RPS28A:ERG10:CAM1:ALD6:RPL5:FAS2:RPL11A	5945:5783:5784:9277:48471:5789:16281:30687:5625:324:5730:18444:31307:5840:329:5842:5737:5754:5843:5739:5756:5829:5792:5971:5794:45121:5886:221:43614:31206:5634:5740:5830:5741:16020:5832:5850:5835
32991	macromolecular complex	42 out of 98 genes, 42.9%	1626 out of 7288 background genes, 22.3%	0.00054	SSA1:FUN12:ATP3:VMA2:SUP45:NHP2:SSB1:SED1:SSS1:EFT2:RPL12A:CHZ1:KAP123:NSA2:PAB1:ARC1:RPL1B:RPL9A:RNR4:PFK1:RPL8A:TIF2:SUI2:ATP2:SIK1:YEF3:RPS1B:PFK2:RPL20A:TIF11:RPP2A:CDC33:RPL3:RPS28A:BFR1:RPB10:CAF20:NOP58:CAM1:RPL5:FAS2:RPL11A	5945:5678:31428:5784:9277:5789:42175:16281:30687:5730:5625:18444:5643:5732:5840:329:5736:5842:5737:5665:5754:17102:5843:5666:5844:5739:5845:5829:5756:30529:5971:221:43614:31206:5634:5830:5832:5850:5835
5842	cytosolic large ribosomal subunit (sensu Eukaryota)	9 out of 98 genes, 9.2%	97 out of 7288 background genes, 1.3%	0.00073	RPL12A:RPL1B:RPL9A:RPL8A:RPL20A:RPP2A:RPL3:RPL5:RPL11A	5842
43228	non-membrane-bound organelle	29 out of 98 genes, 29.6%	1025 out of 7288 background genes, 14.1%	0.0067	FUN12:NHP2:SED1:EFT2:RPL12A:NSA2:PAB1:RPL1B:RPL9A:NSR1:RPL8A:SBP1:TIF2:SUI2:SIK1:YEF3:RPS1B:RPL20A:TIF11:RPP2A:CDC33:RPL3:RPS28A:RPB10:NOP58:CAM1:RPL5:NHP6A:RPL11A	31428:9277:790:16281:30687:5730:5732:5840:5736:5737:5842:5665:5843:5666:5739:43614:5634:5830:5850
43232	intracellular non-membrane-bound organelle	29 out of 98 genes, 29.6%	1025 out of 7288 background genes, 14.1%	0.0067	FUN12:NHP2:SED1:EFT2:RPL12A:NSA2:PAB1:RPL1B:RPL9A:NSR1:RPL8A:SBP1:TIF2:SUI2:SIK1:YEF3:RPS1B:RPL20A:TIF11:RPP2A:CDC33:RPL3:RPS28A:RPB10:NOP58:CAM1:RPL5:NHP6A:RPL11A	31428:9277:790:16281:30687:5730:5732:5840:5736:5737:5842:5665:5843:5666:5739:43614:5634:5830:5850
Bi-cluster 5	Score 210
YGR037C	ACB1	YGR037C
YNL220W	ADE12	YNL220W
YPL061W	ALD6	YPL061W
YGL105W	ARC1	YGL105W
YOL058W	ARG1	YOL058W
YBR249C	ARO4	YBR249C
YJR121W	ATP2	YJR121W
YOR198C	BFR1	YOR198C
YER177W	BMH1	YER177W
YOL139C	CDC33	YOL139C
YKL096W	CWP1	YKL096W
YGL078C	DBP3	YGL078C		Mean pattern, and conditions
YHR068W	DYS1	YHR068W
YDR385W	EFT2	YDR385W
YPL028W	ERG10	YPL028W
YHR007C	ERG11	YHR007C
YPL231W	FAS2	YPL231W
YKL060C	FBA1	YKL060C
YOR375C	GDH1	YOR375C
YBR121C	GRS1	YBR121C
YML126C	ERG13	YML126C
YDR158W	HOM2	YDR158W
YJR139C	HOM6	YJR139C
YDR399W	HPT1	YDR399W
YMR186W	HSC82	YMR186W
YFL014W	HSP12	YFL014W
YGL253W	HXK2	YGL253W
YBL076C	ILS1	YBL076C
YJR016C	ILV3	YJR016C
YER110C	KAP123	YER110C
YER091C	MET6	YER091C
YOR232W	MGE1	YOR232W
YJR077C	MIR1	YJR077C
YDL208W	NHP2	YDL208W
YPR052C	NHP6A	YPR052C
YOR310C	NOP58	YOR310C
YLR197W	SIK1	YLR197W
YGR159C	NSR1	YGR159C
YGL055W	OLE1	YGL055W
YER165W	PAB1	YER165W
YHR064C	SSZ1	YHR064C
YGR240C	PFK1	YGR240C
YMR205C	PFK2	YMR205C
YBR196C	PGI1	YBR196C
YCR012W	PGK1	YCR012W
YBR106W	PHO88	YBR106W
YGL008C	PMA1	YGL008C
YOR361C	PRT1	YOR361C
YAL038W	CDC19	YAL038W
YER070W	RNR1	YER070W
YGR180C	RNR4	YGR180C
YOR341W	RPA190	YOR341W
YPR102C	RPL11A	YPR102C
YEL054C	RPL12A	YEL054C
YGL135W	RPL1B	YGL135W
YMR242C	RPL20A	YMR242C
YOR063W	RPL3	YOR063W
YPL131W	RPL5	YPL131W
YHL033C	RPL8A	YHL033C
YGL147C	RPL9A	YGL147C
YOL039W	RPP2A	YOL039W
YML063W	RPS1B	YML063W
YOR167C	RPS28A	YOR167C
YER043C	SAH1	YER043C
YDR502C	SAM2	YDR502C
YHL034C	SBP1	YHL034C
YLR058C	SHM2	YLR058C
YPR069C	SPE3	YPR069C
YAL005C	SSA1	YAL005C
YDL229W	SSB1	YDL229W
YPL106C	SSE1	YPL106C
YDR086C	SSS1	YDR086C
YJR007W	SUI2	YJR007W
YNL066W	SUN4	YNL066W
YBR143C	SUP45	YBR143C
YLR372W	SUR4	YLR372W
YPL048W	CAM1	YPL048W
YCR053W	THR4	YCR053W
YMR260C	TIF11	YMR260C
YJL138C	TIF2	YJL138C
YDR353W	TRR1	YDR353W
YGR209C	TRX2	YGR209C
YGR094W	VAS1	YGR094W
YBR127C	VMA2	YBR127C
YAL035W	FUN12	YAL035W
YBR025C	non	YBR025C
YNL064C	YDJ1	YNL064C
YDR233C	RTN1	YDR233C
YLR249W	YEF3	YLR249W
YER126C	NSA2	YER126C
YGR234W	YHB1	YGR234W
YMR241W	YHM2	YMR241W
YHR049W	FSH1	YHR049W
YJR070C	LIA1	YJR070C
YLR432W	IMD3	YLR432W
YPL093W	NOG1	YPL093W
YGR285C	ZUO1	YGR285C
GO Enrichments
Process
GOID	GO_term	Cluster frequency	Background frequency	P-value	Gene(s) annotated to the term	Directly Annotated GOID List
9058	biosynthetic process	52 out of 97 genes, 53.6%	1220 out of 7288 background genes, 16.7%	3.4e-14	SSA1:FUN12:ILS1:GRS1:SUP45:PGI1:ARO4:PGK1:SSB1:HOM2:EFT2:RPL12A:MET6:PAB1:ARC1:RPL1B:RPL9A:VAS1:ZUO1:RPL8A:ERG11:SSZ1:DYS1:TIF2:SUI2:ILV3:LIA1:ATP2:HOM6:FBA1:YEF3:SUR4:IMD3:RPS1B:ERG13:RPL20A:TIF11:ADE12:RPP2A:ARG1:CDC33:RPL3:RPS28A:PRT1:GDH1:ERG10:CAM1:ALD6:RPL5:FAS2:SPE3:RPL11A	53:910:15986:8295:74:6696:51083:6892:18065:6409:6426:6353:1321:6446:6448:6537:46086:30148:46515:6626:184:9082:6555:27:60:9086:723:6950:42254:30497:6412:6413:6414:6164:6415:19413:15940:6183:6450:6094:6418:226:42493:6096:6526:6098:6616:6438:6633:9073:6457:9090:8612:42026:52:6566
44249	cellular biosynthetic process	49 out of 97 genes, 50.5%	1143 out of 7288 background genes, 15.7%	4.21e-13	SSA1:FUN12:ILS1:GRS1:SUP45:PGI1:ARO4:PGK1:SSB1:HOM2:EFT2:RPL12A:MET6:PAB1:ARC1:RPL1B:RPL9A:VAS1:ZUO1:RPL8A:SSZ1:DYS1:TIF2:SUI2:ILV3:LIA1:ATP2:HOM6:FBA1:YEF3:SUR4:IMD3:RPS1B:RPL20A:TIF11:ADE12:RPP2A:ARG1:CDC33:RPL3:RPS28A:PRT1:GDH1:CAM1:ALD6:RPL5:FAS2:SPE3:RPL11A	53:910:15986:8295:74:51083:6892:18065:6409:6353:6426:1321:6446:6448:6537:46086:30148:46515:6626:184:9082:6555:27:60:723:9086:6950:42254:30497:6412:6413:6414:6164:6415:19413:15940:6183:226:6418:6450:6094:42493:6096:6526:6438:6098:6616:6633:9073:6457:8612:9090:42026:52:6566
44237	cellular metabolic process	83 out of 97 genes, 85.6%	3429 out of 7288 background genes, 47.0%	9.46e-13	SSA1:FUN12:CDC19:ILS1:GRS1:SUP45:PGI1:ARO4:PGK1:THR4:NHP2:SSB1:HOM2:TRR1:EFT2:HPT1:SAM2:RPL12A:SAH1:RNR1:MET6:NSA2:PAB1:BMH1:HSP12:OLE1:DBP3:ARC1:RPL1B:RPL9A:HXK2:ACB1:VAS1:NSR1:RNR4:TRX2:PFK1:ZUO1:RPL8A:SBP1:ERG11:SSZ1:DYS1:TIF2:SUI2:ILV3:LIA1:ATP2:HOM6:FBA1:SHM2:SIK1:YEF3:SUR4:IMD3:RPS1B:ERG13:HSC82:PFK2:RPL20A:TIF11:YDJ1:ADE12:RPP2A:ARG1:CDC33:RPL3:RPS28A:BFR1:NOP58:RPA190:PRT1:GDH1:ERG10:CAM1…	15986:8295:6006:74:6696:77:51083:103:18065:43248:6260:6261:6409:6338:1321:6446:30503:6730:6448:46086:30148:46515:6626:184:30433:6555:30437:723:16071:6013:6950:84:5977:46015:42273:6888:16259:6412:6413:6414:6090:6164:6415:19413:1:226:6418:6450:6094:42493:154:11:6096:6526:6631:1402:6098:6633:9073:6457:6458:6636:42026:52:6566:53:54:910:32263:32264:45944:6890:32445:6892:30489:45047:6897:6426:6353:7155…
8152	metabolic process	83 out of 97 genes, 85.6%	3509 out of 7288 background genes, 48.1%	4.93e-12	SSA1:FUN12:CDC19:ILS1:GRS1:SUP45:PGI1:ARO4:PGK1:THR4:NHP2:SSB1:HOM2:TRR1:EFT2:HPT1:SAM2:RPL12A:SAH1:RNR1:MET6:NSA2:PAB1:BMH1:HSP12:OLE1:DBP3:ARC1:RPL1B:RPL9A:HXK2:ACB1:VAS1:NSR1:RNR4:TRX2:PFK1:ZUO1:RPL8A:SBP1:ERG11:SSZ1:DYS1:TIF2:SUI2:ILV3:LIA1:ATP2:HOM6:FBA1:SHM2:SIK1:YEF3:SUR4:IMD3:RPS1B:ERG13:HSC82:PFK2:RPL20A:TIF11:YDJ1:ADE12:RPP2A:ARG1:CDC33:RPL3:RPS28A:BFR1:NOP58:RPA190:PRT1:GDH1:ERG10:CAM1…	15986:8295:6006:74:6696:77:51083:103:18065:43248:6260:6261:6409:6338:1321:6446:30503:6730:6448:46086:30148:46515:6626:184:30433:6555:30437:723:16071:6013:6950:84:5977:46015:42273:6888:16259:6412:6413:6414:6090:6164:6415:19413:1:226:6418:6450:6094:42493:154:11:6096:6526:6631:1402:6098:6633:9073:6457:6458:6636:42026:52:6566:53:54:910:32263:32264:45944:6890:32445:6892:30489:45047:6897:7155:6353:6426…
44238	primary metabolic process	79 out of 97 genes, 81.4%	3207 out of 7288 background genes, 44.0%	1.32e-11	SSA1:FUN12:CDC19:ILS1:GRS1:SUP45:PGI1:ARO4:PGK1:THR4:NHP2:SSB1:HOM2:EFT2:HPT1:SAM2:RPL12A:SAH1:RNR1:MET6:NSA2:PAB1:BMH1:OLE1:DBP3:ARC1:RPL1B:RPL9A:HXK2:ACB1:VAS1:NSR1:RNR4:TRX2:PFK1:ZUO1:RPL8A:SBP1:ERG11:SSZ1:DYS1:TIF2:SUI2:ILV3:LIA1:ATP2:HOM6:FBA1:SIK1:YEF3:SUR4:IMD3:RPS1B:ERG13:HSC82:PFK2:RPL20A:TIF11:YDJ1:ADE12:RPP2A:ARG1:CDC33:RPL3:RPS28A:BFR1:NOP58:RPA190:PRT1:GDH1:ERG10:CAM1:NOG1:SSE1:RPL5:…	15986:8295:6006:74:6696:77:51083:103:18065:43248:6260:6261:6409:6338:1321:30503:6446:6448:46086:30148:46515:6626:184:30433:6555:30437:723:16071:6013:6950:84:5977:46015:42273:6888:16259:6412:6413:6414:6090:6164:6415:1:226:6418:6450:6094:42493:154:11:6096:6526:6631:1402:6098:6633:9073:6457:6458:6636:42026:52:6566:53:54:910:32263:32264:45944:6890:32445:6892:30489:45047:6897:6353:6426:1302:6357:7265:…
9987	cellular process	91 out of 97 genes, 93.8%	4701 out of 7288 background genes, 64.5%	3.87e-09	SSA1:FUN12:CDC19:ILS1:PHO88:GRS1:VMA2:SUP45:PGI1:ARO4:PGK1:THR4:NHP2:SSB1:SSS1:HOM2:TRR1:EFT2:HPT1:SAM2:RPL12A:SAH1:RNR1:MET6:KAP123:NSA2:PAB1:BMH1:HSP12:OLE1:DBP3:ARC1:RPL1B:RPL9A:HXK2:ACB1:VAS1:NSR1:RNR4:TRX2:PFK1:ZUO1:RPL8A:SBP1:ERG11:SSZ1:DYS1:TIF2:SUI2:ILV3:LIA1:ATP2:HOM6:FBA1:CWP1:SHM2:SIK1:YEF3:SUR4:IMD3:RPS1B:ERG13:HSC82:PFK2:YHM2:RPL20A:TIF11:YDJ1:SUN4:ADE12:RPP2A:ARG1:CDC33:RPL3:RPS28A:…	8295:6696:51083:18065:6260:6261:6409:6620:6338:1321:6626:6555:6842:723:5977:42273:16259:6412:6413:6414:6415:1:2:226:6418:31204:42493:154:6631:1402:6633:6636:52:6566:53:54:7005:32445:30489:45047:7155:6353:6426:6357:6359:7088:9408:60:42144:30490:9269:30497:6360:15909:6364:6438:6365:8612:6000:15986:6006:74:6874:77:103:43248:30503:6446:6730:46515:30148:46086:6448:30433:184:30437:6950:6013:16071:84:46…
19752	carboxylic acid metabolic process	22 out of 97 genes, 22.7%	308 out of 7288 background genes, 4.2%	2.56e-08	CDC19:GRS1:PGI1:ARO4:PGK1:THR4:HOM2:SAM2:SAH1:MET6:OLE1:ARC1:ACB1:VAS1:ILV3:HOM6:FBA1:SUR4:ARG1:GDH1:ALD6:FAS2	18065:6409:6555:723:16259:1:6418:42493:6631:6633:6636:52:6566:53:6353:6426:30497:15909:6438:30148:6090:19413:6094:6096:6526:6098:9073:6892:6897:6537:9082:9086:9090
6082	organic acid metabolic process	22 out of 97 genes, 22.7%	308 out of 7288 background genes, 4.2%	2.56e-08	CDC19:GRS1:PGI1:ARO4:PGK1:THR4:HOM2:SAM2:SAH1:MET6:OLE1:ARC1:ACB1:VAS1:ILV3:HOM6:FBA1:SUR4:ARG1:GDH1:ALD6:FAS2	18065:6409:6555:723:16259:1:6418:42493:6631:6633:6636:52:6566:53:6353:6426:30497:15909:6438:30148:6090:19413:6094:6096:6526:6098:9073:6892:6897:6537:9082:9086:9090
6412	translation	30 out of 97 genes, 30.9%	684 out of 7288 background genes, 9.4%	8.55e-07	SSA1:FUN12:ILS1:GRS1:SUP45:SSB1:EFT2:RPL12A:PAB1:ARC1:RPL1B:RPL9A:VAS1:ZUO1:RPL8A:SSZ1:TIF2:SUI2:YEF3:RPS1B:RPL20A:TIF11:RPP2A:CDC33:RPL3:RPS28A:PRT1:CAM1:RPL5:RPL11A	51083:6409:6626:723:6412:6413:6414:6415:6418:6353:6426:60:6438:74:6446:6448:184:6950:6450:6457:42026:910:27:42254:6616
6519	amino acid and derivative metabolic process	16 out of 97 genes, 16.5%	200 out of 7288 background genes, 2.7%	2.99e-06	GRS1:ARO4:THR4:HOM2:SAM2:SAH1:MET6:ARC1:VAS1:DYS1:ILV3:LIA1:HOM6:ARG1:GDH1:SPE3	8295:6409:6555:16259:226:6418:42493:52:6566:53:6353:6426:6438:8612:46515:6526:9073:6897:6537:9082:9086:42254:15940:9090
9059	macromolecule biosynthetic process	33 out of 97 genes, 34.0%	872 out of 7288 background genes, 12.0%	4.36e-06	SSA1:FUN12:ILS1:GRS1:SUP45:PGI1:PGK1:SSB1:EFT2:RPL12A:PAB1:ARC1:RPL1B:RPL9A:VAS1:ZUO1:RPL8A:SSZ1:TIF2:SUI2:FBA1:YEF3:RPS1B:RPL20A:TIF11:RPP2A:CDC33:RPL3:RPS28A:PRT1:CAM1:RPL5:RPL11A	51083:6409:6626:723:6412:6413:6414:6415:6418:6353:6426:60:6438:74:6446:6448:184:6950:6450:6094:6096:6098:6457:42026:910:27:42254:6616
6096	glycolysis	7 out of 97 genes, 7.2%	24 out of 7288 background genes, 0.3%	8.03e-06	CDC19:PGI1:PGK1:HXK2:PFK1:FBA1:PFK2	32445:6000:6006:6013:46015:6090:6094:6096:6098:1302:46323:8361
22618	protein-RNA complex assembly	13 out of 97 genes, 13.4%	140 out of 7288 background genes, 1.9%	1.52e-05	FUN12:RPL12A:PAB1:DBP3:NSR1:TIF2:SUI2:TIF11:CDC33:RPL3:PRT1:RPL5:RPL11A	723:6412:6413:6364:6365:74:6446:184:27:28
22613	ribonucleoprotein complex biogenesis and assembly	21 out of 97 genes, 21.6%	400 out of 7288 background genes, 5.5%	1.96e-05	FUN12:NHP2:RPL12A:NSA2:PAB1:DBP3:NSR1:SBP1:TIF2:SUI2:LIA1:SIK1:YEF3:TIF11:CDC33:RPL3:NOP58:PRT1:NOG1:RPL5:RPL11A	723:42273:6412:6413:6414:226:154:54:30489:30490:6364:6365:74:6446:46515:184:27:28:42254:31118
6007	glucose catabolic process	7 out of 97 genes, 7.2%	34 out of 7288 background genes, 0.5%	0.00011	CDC19:PGI1:PGK1:HXK2:PFK1:FBA1:PFK2	32445:6000:6006:6013:46015:6090:6094:6096:6098:1302:46323:8361
19320	hexose catabolic process	7 out of 97 genes, 7.2%	37 out of 7288 background genes, 0.5%	0.0002	CDC19:PGI1:PGK1:HXK2:PFK1:FBA1:PFK2	32445:6000:6006:6013:46015:6090:6094:6096:6098:1302:46323:8361
6520	amino acid metabolic process	13 out of 97 genes, 13.4%	185 out of 7288 background genes, 2.5%	0.0004	GRS1:ARO4:THR4:HOM2:SAM2:SAH1:MET6:ARC1:VAS1:ILV3:HOM6:ARG1:GDH1	6409:6555:16259:6418:42493:52:6566:53:6353:6426:6438:6526:9073:6897:6537:9082:9086:9090
46365	monosaccharide catabolic process	7 out of 97 genes, 7.2%	42 out of 7288 background genes, 0.6%	0.00051	CDC19:PGI1:PGK1:HXK2:PFK1:FBA1:PFK2	32445:6000:6006:6013:46015:6090:6094:6096:6098:1302:46323:8361
9308	amine metabolic process	14 out of 97 genes, 14.4%	223 out of 7288 background genes, 3.1%	0.00057	GRS1:ARO4:THR4:HOM2:SAM2:SAH1:MET6:ARC1:VAS1:ILV3:HOM6:ARG1:GDH1:SPE3	8295:6409:6555:16259:6418:42493:52:6566:53:6353:6426:6438:6526:9073:6897:6537:9082:9086:15940:9090
46164	alcohol catabolic process	7 out of 97 genes, 7.2%	45 out of 7288 background genes, 0.6%	0.00083	CDC19:PGI1:PGK1:HXK2:PFK1:FBA1:PFK2	32445:6000:6006:6013:46015:6090:6094:6096:6098:1302:46323:8361
6413	translational initiation	7 out of 97 genes, 7.2%	48 out of 7288 background genes, 0.7%	0.00131	FUN12:PAB1:TIF2:SUI2:TIF11:CDC33:PRT1	6413:74:6446:184
42026	protein refolding	4 out of 97 genes, 4.1%	9 out of 7288 background genes, 0.1%	0.00165	SSA1:HSC82:YDJ1:SSE1	6626:723:6412:42493:45047:60:43248:30433:6950:6457:6458:42026:6616
6807	nitrogen compound metabolic process	14 out of 97 genes, 14.4%	244 out of 7288 background genes, 3.3%	0.00168	GRS1:ARO4:THR4:HOM2:SAM2:SAH1:MET6:ARC1:VAS1:ILV3:HOM6:ARG1:GDH1:SPE3	8295:6409:6555:16259:6418:42493:52:6566:53:6353:6426:6438:6526:9073:6897:6537:9082:9086:15940:9090
6555	methionine metabolic process	5 out of 97 genes, 5.2%	23 out of 7288 background genes, 0.3%	0.00492	HOM2:SAM2:SAH1:MET6:HOM6	6555:16259:42493:6566:9086:9090
6417	regulation of translation	6 out of 97 genes, 6.2%	42 out of 7288 background genes, 0.6%	0.00796	SSB1:PAB1:ZUO1:SSZ1:TIF2:CAM1	51083:6412:6413:6446:6448:6450:6457
42273	ribosomal large subunit biogenesis and assembly	7 out of 97 genes, 7.2%	63 out of 7288 background genes, 0.9%	0.00841	RPL12A:NSA2:DBP3:RPL3:NOG1:RPL5:RPL11A	42273:6412:54:30489:6365:27:42254
6006	glucose metabolic process	7 out of 97 genes, 7.2%	64 out of 7288 background genes, 0.9%	0.00934	CDC19:PGI1:PGK1:HXK2:PFK1:FBA1:PFK2	32445:6000:6006:6013:46015:6090:6094:6096:6098:1302:46323:8361
Function
GOID	GO_term	Cluster frequency	Background frequency	P-value	Gene(s) annotated to the term	Directly Annotated GOID List
8135	translation factor activity, nucleic acid binding	10 out of 97 genes, 10.3%	46 out of 7288 background genes, 0.6%	4.74e-08	FUN12:SUP45:EFT2:TIF2:SUI2:YEF3:TIF11:CDC33:PRT1:CAM1	16149:3743:3746:3924:3724
45182	translation regulator activity	10 out of 97 genes, 10.3%	57 out of 7288 background genes, 0.8%	4.46e-07	FUN12:SUP45:EFT2:TIF2:SUI2:YEF3:TIF11:CDC33:PRT1:CAM1	16149:3743:3746:3924:3724
3824	catalytic activity	50 out of 97 genes, 51.5%	1988 out of 7288 background genes, 27.3%	4.71e-05	SSA1:FUN12:CDC19:ILS1:GRS1:VMA2:PGI1:ARO4:PGK1:THR4:SSB1:HOM2:TRR1:HPT1:SAM2:SAH1:RNR1:MET6:PMA1:OLE1:DBP3:HXK2:VAS1:RNR4:TRX2:YHB1:PFK1:ERG11:FSH1:DYS1:TIF2:ILV3:LIA1:HOM6:FBA1:SHM2:SUR4:IMD3:ERG13:HSC82:PFK2:SUN4:ADE12:ARG1:RPA190:GDH1:ERG10:ALD6:FAS2:SPE3	4028:3985:16966:3899:4315:4316:4421:4332:51082:4422:9922:17171:46961:4354:42623:4372:19135:5515:4820:4822:4396:8897:3938:3849:4013:30508:4791:4019:4795:8553:16887:4055:4160:4412:4073:8398:4347:3724:4618:3743:3924:15926:4743:4832:4478:3871:4004:3872:4748:16765:4766:4768
3743	translation initiation factor activity	6 out of 97 genes, 6.2%	29 out of 7288 background genes, 0.4%	0.00028	FUN12:TIF2:SUI2:TIF11:CDC33:PRT1	3724:3743:3924
16491	oxidoreductase activity	14 out of 97 genes, 14.4%	265 out of 7288 background genes, 3.6%	0.00148	HOM2:TRR1:RNR1:OLE1:RNR4:TRX2:YHB1:ERG11:LIA1:HOM6:IMD3:GDH1:ALD6:FAS2	4028:16966:4315:4316:4354:19135:5515:8897:3938:30508:4791:4412:4073:8398:4748:4768
51082	unfolded protein binding	7 out of 97 genes, 7.2%	58 out of 7288 background genes, 0.8%	0.00163	SSA1:SSB1:ZUO1:SSZ1:HSC82:YDJ1:MGE1	51082:42623:30188:16887:1671:30192
Component
GOID	GO_term	Cluster frequency	Background frequency	P-value	Gene(s) annotated to the term	Directly Annotated GOID List
5737	cytoplasm	85 out of 97 genes, 87.6%	3694 out of 7288 background genes, 50.7%	1.28e-12	SSA1:FUN12:CDC19:ILS1:YBR025C:PHO88:GRS1:VMA2:SUP45:PGI1:ARO4:PGK1:THR4:SSS1:HOM2:RTN1:TRR1:EFT2:HPT1:RPL12A:SAH1:RNR1:MET6:KAP123:NSA2:PAB1:HSP12:PMA1:OLE1:ARC1:RPL1B:RPL9A:HXK2:ACB1:VAS1:NSR1:RNR4:TRX2:YHB1:PFK1:ZUO1:RPL8A:ERG11:FSH1:SSZ1:DYS1:TIF2:SUI2:ILV3:LIA1:MIR1:ATP2:HOM6:FBA1:SHM2:YEF3:SUR4:IMD3:RPS1B:ERG13:HSC82:PFK2:YHM2:RPL20A:TIF11:YDJ1:SUN4:ADE12:RPP2A:ARG1:CDC33:RPL3:RPS28A:MGE1:PR…	5945:5783:5784:9277:48471:5789:16281:30687:42645:5625:324:5730:18444:5643:329:5840:5737:5842:5754:17102:5843:5739:5829:5759:5792:5971:5794:45121:5886:221:43614:31206:5634:5740:5830:16020:5832:5743:1405:5850:5835:5852
44424	intracellular part	95 out of 97 genes, 97.9%	5052 out of 7288 background genes, 69.3%	3.54e-11	SSA1:FUN12:CDC19:ILS1:YBR025C:PHO88:GRS1:VMA2:SUP45:PGI1:ARO4:PGK1:THR4:NHP2:SSB1:SSS1:HOM2:RTN1:TRR1:EFT2:HPT1:RPL12A:SAH1:RNR1:MET6:KAP123:NSA2:PAB1:BMH1:HSP12:PMA1:OLE1:DBP3:ARC1:RPL1B:RPL9A:HXK2:ACB1:VAS1:NSR1:RNR4:TRX2:YHB1:PFK1:ZUO1:RPL8A:SBP1:ERG11:FSH1:SSZ1:DYS1:TIF2:SUI2:ILV3:LIA1:MIR1:ATP2:HOM6:FBA1:SHM2:SIK1:YEF3:SUR4:IMD3:RPS1B:ERG13:HSC82:PFK2:YHM2:RPL20A:TIF11:YDJ1:SUN4:ADE12:RPP2A:…	5945:5783:31428:5784:9277:48471:5789:42175:790:16281:30687:42645:324:5730:5625:18444:5643:5732:5840:329:5736:5842:5737:5754:17102:5843:5844:5739:5829:5759:30529:5792:5971:5794:45121:5886:221:43614:31206:5634:5740:5830:16020:5743:5832:1405:5850:5835:5852
5622	intracellular	95 out of 97 genes, 97.9%	5087 out of 7288 background genes, 69.8%	6.66e-11	SSA1:FUN12:CDC19:ILS1:YBR025C:PHO88:GRS1:VMA2:SUP45:PGI1:ARO4:PGK1:THR4:NHP2:SSB1:SSS1:HOM2:RTN1:TRR1:EFT2:HPT1:RPL12A:SAH1:RNR1:MET6:KAP123:NSA2:PAB1:BMH1:HSP12:PMA1:OLE1:DBP3:ARC1:RPL1B:RPL9A:HXK2:ACB1:VAS1:NSR1:RNR4:TRX2:YHB1:PFK1:ZUO1:RPL8A:SBP1:ERG11:FSH1:SSZ1:DYS1:TIF2:SUI2:ILV3:LIA1:MIR1:ATP2:HOM6:FBA1:SHM2:SIK1:YEF3:SUR4:IMD3:RPS1B:ERG13:HSC82:PFK2:YHM2:RPL20A:TIF11:YDJ1:SUN4:ADE12:RPP2A:…	5945:5783:31428:5784:9277:48471:5789:42175:790:16281:30687:42645:324:5730:5625:18444:5643:5732:5840:329:5736:5842:5737:5754:17102:5843:5844:5739:5829:5759:30529:5792:5971:5794:45121:5886:221:43614:31206:5634:5740:5830:16020:5743:5832:1405:5850:5835:5852
44464	cell part	96 out of 97 genes, 99.0%	5495 out of 7288 background genes, 75.4%	4.44e-09	SSA1:FUN12:CDC19:ILS1:YBR025C:PHO88:GRS1:VMA2:SUP45:PGI1:ARO4:PGK1:THR4:NHP2:SSB1:SSS1:HOM2:RTN1:TRR1:EFT2:HPT1:RPL12A:SAH1:RNR1:MET6:KAP123:NSA2:PAB1:BMH1:HSP12:PMA1:OLE1:DBP3:ARC1:RPL1B:RPL9A:HXK2:ACB1:VAS1:NSR1:RNR4:TRX2:YHB1:PFK1:ZUO1:RPL8A:SBP1:ERG11:FSH1:SSZ1:DYS1:TIF2:SUI2:ILV3:LIA1:MIR1:ATP2:HOM6:FBA1:CWP1:SHM2:SIK1:YEF3:SUR4:IMD3:RPS1B:ERG13:HSC82:PFK2:YHM2:RPL20A:TIF11:YDJ1:SUN4:ADE12:R…	5945:5783:31428:5784:9277:48471:5789:42175:790:16281:30687:5621:42645:324:5730:5625:18444:5643:5732:5840:329:5736:5842:5737:5754:17102:5843:5844:5739:5829:5759:30529:5792:5971:5794:45121:5886:221:43614:31206:5634:5740:5830:16020:5743:5832:1405:5850:5835:5852
5829	cytosol	28 out of 97 genes, 28.9%	617 out of 7288 background genes, 8.5%	4.58e-07	SSA1:FUN12:CDC19:ILS1:SUP45:PGI1:RPL12A:RPL1B:RPL9A:HXK2:TRX2:YHB1:PFK1:RPL8A:FBA1:RPS1B:PFK2:RPL20A:YDJ1:RPP2A:ARG1:RPL3:RPS28A:ERG10:CAM1:ALD6:RPL5:RPL11A	5945:9277:48471:324:18444:329:5842:5737:5843:5739:5829:5759:5792:5634:5830:5832
30529	ribonucleoprotein complex	28 out of 97 genes, 28.9%	618 out of 7288 background genes, 8.5%	4.75e-07	FUN12:NHP2:SSB1:EFT2:RPL12A:NSA2:PAB1:RPL1B:RPL9A:ZUO1:RPL8A:TIF2:SUI2:SIK1:YEF3:RPS1B:RPL20A:TIF11:RPP2A:CDC33:RPL3:RPS28A:BFR1:NOP58:CAM1:NOG1:RPL5:RPL11A	31428:42175:16281:30687:5730:5625:5732:5840:5737:5842:5843:5844:5739:30529:43614:5634:5830:5850
44445	cytosolic part	16 out of 97 genes, 16.5%	197 out of 7288 background genes, 2.7%	6.65e-07	SSA1:FUN12:RPL12A:RPL1B:RPL9A:PFK1:RPL8A:RPS1B:PFK2:RPL20A:RPP2A:RPL3:RPS28A:CAM1:RPL5:RPL11A	5945:9277:329:5842:5737:5843:5739:5634:5830:5832
5840	ribosome	21 out of 97 genes, 21.6%	357 out of 7288 background genes, 4.9%	7.33e-07	FUN12:EFT2:RPL12A:PAB1:RPL1B:RPL9A:ZUO1:RPL8A:TIF2:SUI2:YEF3:RPS1B:RPL20A:TIF11:RPP2A:CDC33:RPL3:RPS28A:CAM1:RPL5:RPL11A	16281:5840:5737:5842:5843:5739:43614:5634:5830:5850
44444	cytoplasmic part	62 out of 97 genes, 63.9%	2700 out of 7288 background genes, 37.0%	7.82e-06	SSA1:FUN12:CDC19:ILS1:PHO88:GRS1:VMA2:SUP45:PGI1:PGK1:SSS1:RTN1:EFT2:RPL12A:RNR1:NSA2:PAB1:PMA1:OLE1:RPL1B:RPL9A:HXK2:VAS1:NSR1:RNR4:TRX2:YHB1:PFK1:ZUO1:RPL8A:ERG11:TIF2:SUI2:ILV3:MIR1:ATP2:FBA1:YEF3:SUR4:RPS1B:ERG13:HSC82:PFK2:YHM2:RPL20A:TIF11:YDJ1:SUN4:RPP2A:ARG1:CDC33:RPL3:RPS28A:MGE1:PRT1:ERG10:CAM1:ALD6:NOG1:RPL5:FAS2:RPL11A	5945:5783:5784:9277:48471:5789:16281:30687:42645:5625:324:5730:18444:5840:329:5842:5737:5754:5843:5739:5829:5759:5792:5971:5794:45121:5886:221:43614:31206:5634:5740:5830:16020:5743:5832:1405:5850:5835:5852
5830	cytosolic ribosome (sensu Eukaryota)	13 out of 97 genes, 13.4%	176 out of 7288 background genes, 2.4%	6.31e-05	FUN12:RPL12A:RPL1B:RPL9A:RPL8A:RPS1B:RPL20A:RPP2A:RPL3:RPS28A:CAM1:RPL5:RPL11A	5842:5843:5739:5830
32991	macromolecular complex	43 out of 97 genes, 44.3%	1626 out of 7288 background genes, 22.3%	0.00013	SSA1:FUN12:VMA2:SUP45:NHP2:SSB1:SSS1:EFT2:RPL12A:RNR1:KAP123:NSA2:PAB1:ARC1:RPL1B:RPL9A:RNR4:PFK1:ZUO1:RPL8A:TIF2:SUI2:ATP2:SIK1:YEF3:RPS1B:PFK2:RPL20A:TIF11:RPP2A:CDC33:RPL3:RPS28A:BFR1:MGE1:NOP58:RPA190:PRT1:CAM1:NOG1:RPL5:FAS2:RPL11A	5945:31428:5784:9277:5789:42175:16281:30687:5730:5625:18444:5643:5732:5840:329:5736:5842:5737:5754:17102:5843:5844:5739:5829:5759:30529:5971:221:43614:31206:5634:5830:5832:1405:5850:5835:5852
43228	non-membrane-bound organelle	31 out of 97 genes, 32.0%	1025 out of 7288 background genes, 14.1%	0.00062	FUN12:NHP2:EFT2:RPL12A:NSA2:PAB1:DBP3:RPL1B:RPL9A:NSR1:ZUO1:RPL8A:SBP1:TIF2:SUI2:SIK1:YEF3:RPS1B:RPL20A:TIF11:RPP2A:CDC33:RPL3:RPS28A:NOP58:RPA190:CAM1:NOG1:RPL5:NHP6A:RPL11A	31428:790:16281:30687:5730:5732:5840:5736:5737:5842:5843:5739:43614:5634:5830:5850
43232	intracellular non-membrane-bound organelle	31 out of 97 genes, 32.0%	1025 out of 7288 background genes, 14.1%	0.00062	FUN12:NHP2:EFT2:RPL12A:NSA2:PAB1:DBP3:RPL1B:RPL9A:NSR1:ZUO1:RPL8A:SBP1:TIF2:SUI2:SIK1:YEF3:RPS1B:RPL20A:TIF11:RPP2A:CDC33:RPL3:RPS28A:NOP58:RPA190:CAM1:NOG1:RPL5:NHP6A:RPL11A	31428:790:16281:30687:5730:5732:5840:5736:5737:5842:5843:5739:43614:5634:5830:5850
5842	cytosolic large ribosomal subunit (sensu Eukaryota)	9 out of 97 genes, 9.3%	97 out of 7288 background genes, 1.3%	0.00063	RPL12A:RPL1B:RPL9A:RPL8A:RPL20A:RPP2A:RPL3:RPL5:RPL11A	5842
43229	intracellular organelle	74 out of 97 genes, 76.3%	4021 out of 7288 background genes, 55.2%	0.00152	SSA1:FUN12:PHO88:GRS1:VMA2:PGI1:ARO4:PGK1:THR4:NHP2:SSS1:HOM2:RTN1:EFT2:HPT1:RPL12A:KAP123:NSA2:PAB1:BMH1:HSP12:PMA1:OLE1:DBP3:RPL1B:RPL9A:HXK2:ACB1:VAS1:NSR1:RNR4:TRX2:YHB1:PFK1:ZUO1:RPL8A:SBP1:ERG11:FSH1:TIF2:SUI2:ILV3:LIA1:MIR1:ATP2:HOM6:FBA1:SIK1:YEF3:SUR4:RPS1B:ERG13:HSC82:PFK2:YHM2:RPL20A:TIF11:SUN4:RPP2A:CDC33:RPL3:RPS28A:MGE1:NOP58:RPA190:GDH1:CAM1:ALD6:NOG1:RPL5:FAS2:NHP6A:SPE3:RPL11A	5945:5783:31428:5784:9277:5789:790:16281:30687:42645:5625:324:5730:5643:5732:5840:329:5736:5842:5737:5754:5843:5739:5829:5759:5971:5794:45121:5886:221:43614:31206:5634:5740:5830:16020:5743:5832:1405:5850:5835
43226	organelle	74 out of 97 genes, 76.3%	4022 out of 7288 background genes, 55.2%	0.00154	SSA1:FUN12:PHO88:GRS1:VMA2:PGI1:ARO4:PGK1:THR4:NHP2:SSS1:HOM2:RTN1:EFT2:HPT1:RPL12A:KAP123:NSA2:PAB1:BMH1:HSP12:PMA1:OLE1:DBP3:RPL1B:RPL9A:HXK2:ACB1:VAS1:NSR1:RNR4:TRX2:YHB1:PFK1:ZUO1:RPL8A:SBP1:ERG11:FSH1:TIF2:SUI2:ILV3:LIA1:MIR1:ATP2:HOM6:FBA1:SIK1:YEF3:SUR4:RPS1B:ERG13:HSC82:PFK2:YHM2:RPL20A:TIF11:SUN4:RPP2A:CDC33:RPL3:RPS28A:MGE1:NOP58:RPA190:GDH1:CAM1:ALD6:NOG1:RPL5:FAS2:NHP6A:SPE3:RPL11A	5945:5783:31428:5784:9277:5789:790:16281:30687:42645:5625:324:5730:5643:5732:5840:329:5736:5842:5737:5754:5843:5739:5829:5759:5971:5794:45121:5886:221:43614:31206:5634:5740:5830:16020:5743:5832:1405:5850:5835
Bi-cluster 6	Score 236			Mean pattern, and conditions
YGR037C	ACB1	YGR037C
YPL061W	ALD6	YPL061W
YGL105W	ARC1	YGL105W
YBR249C	ARO4	YBR249C
YJR121W	ATP2	YJR121W
YBR039W	ATP3	YBR039W
YOR198C	BFR1	YOR198C
YER177W	BMH1	YER177W
YDR099W	BMH2	YDR099W
YOR276W	CAF20	YOR276W
YOL139C	CDC33	YOL139C
YAL012W	CYS3	YAL012W
YHR068W	DYS1	YHR068W
YDR385W	EFT2	YDR385W
YPL028W	ERG10	YPL028W
YHR007C	ERG11	YHR007C
YGR060W	ERG25	YGR060W
YMR015C	ERG5	YMR015C
YPL231W	FAS2	YPL231W
YKL060C	FBA1	YKL060C
YOR375C	GDH1	YOR375C
YBR121C	GRS1	YBR121C
YML126C	ERG13	YML126C
YDR158W	HOM2	YDR158W
YJR139C	HOM6	YJR139C
YER062C	HOR2	YER062C
YMR186W	HSC82	YMR186W
YFL014W	HSP12	YFL014W
YBR072W	HSP26	YBR072W
YGL253W	HXK2	YGL253W
YIL094C	LYS12	YIL094C
YNR050C	LYS9	YNR050C
YKL085W	MDH1	YKL085W
YER091C	MET6	YER091C
YDL208W	NHP2	YDL208W
YPR052C	NHP6A	YPR052C
YOR310C	NOP58	YOR310C
YDR432W	NPL3	YDR432W
YGR159C	NSR1	YGR159C
YGL055W	OLE1	YGL055W
YER165W	PAB1	YER165W
YNL015W	PBI2	YNL015W
YHR064C	SSZ1	YHR064C
YGR240C	PFK1	YGR240C
YMR205C	PFK2	YMR205C
YBR196C	PGI1	YBR196C
YCR012W	PGK1	YCR012W
YBR106W	PHO88	YBR106W
YGL008C	PMA1	YGL008C
YNL055C	POR1	YNL055C
YAL038W	CDC19	YAL038W
YGR180C	RNR4	YGR180C
YOR210W	RPB10	YOR210W
YPR102C	RPL11A	YPR102C
YEL054C	RPL12A	YEL054C
YGL135W	RPL1B	YGL135W
YMR242C	RPL20A	YMR242C
YOR063W	RPL3	YOR063W
YPL131W	RPL5	YPL131W
YHL033C	RPL8A	YHL033C
YGL147C	RPL9A	YGL147C
YOL039W	RPP2A	YOL039W
YML063W	RPS1B	YML063W
YOR167C	RPS28A	YOR167C
YER043C	SAH1	YER043C
YDR502C	SAM2	YDR502C
YKL117W	SBA1	YKL117W
YHL034C	SBP1	YHL034C
YDR077W	SED1	YDR077W
YLR058C	SHM2	YLR058C
YPR069C	SPE3	YPR069C
YAL005C	SSA1	YAL005C
YDL229W	SSB1	YDL229W
YPL106C	SSE1	YPL106C
YDR086C	SSS1	YDR086C
YBR143C	SUP45	YBR143C
YPL048W	CAM1	YPL048W
YCR053W	THR4	YCR053W
YMR260C	TIF11	YMR260C
YJL138C	TIF2	YJL138C
YIL138C	TPM2	YIL138C
YDR353W	TRR1	YDR353W
YGR209C	TRX2	YGR209C
YBR127C	VMA2	YBR127C
YAL035W	FUN12	YAL035W
YBR025C	non	YBR025C
YNL064C	YDJ1	YNL064C
YDR032C	PST2	YDR032C
YDR233C	RTN1	YDR233C
YLR249W	YEF3	YLR249W
YER030W	CHZ1	YER030W
YER044C	ERG28	YER044C
GO Enrichments
Process
GOID	GO_term	Cluster frequency	Background frequency	P-value	Gene(s) annotated to the term	Directly Annotated GOID List
44237	cellular metabolic process	83 out of 92 genes, 90.2%	3429 out of 7288 background genes, 47.0%	6.54e-16	SSA1:CYS3:FUN12:CDC19:ATP3:HSP26:GRS1:SUP45:PGI1:ARO4:PGK1:THR4:NHP2:SSB1:BMH2:HOM2:TRR1:EFT2:SAM2:RPL12A:CHZ1:SAH1:ERG28:HOR2:MET6:PAB1:BMH1:HSP12:OLE1:ARC1:RPL1B:RPL9A:HXK2:ACB1:ERG25:NSR1:RNR4:TRX2:PFK1:RPL8A:SBP1:ERG11:SSZ1:DYS1:LYS12:TPM2:TIF2:ATP2:HOM6:FBA1:MDH1:SBA1:SHM2:YEF3:RPS1B:ERG13:ERG5:HSC82:PFK2:RPL20A:TIF11:PBI2:POR1:YDJ1:LYS9:RPP2A:CDC33:RPL3:RPS28A:BFR1:RPB10:CAF20:NOP58:GDH1:ER…	15986:8295:6006:74:8298:30468:6114:6696:77:51083:103:18065:43248:19878:6260:6261:6409:6338:9060:8154:1321:6446:30503:6730:6448:6626:184:30433:6555:723:30437:16071:6013:6950:84:5975:5977:46015:6887:6888:16259:6412:6413:6414:6090:6415:19413:1:6418:6094:6450:42493:154:11:6096:6631:19346:6098:1402:6633:6811:6099:6383:6457:9073:6458:6636:42026:6566:910:45944:7005:6890:32445:96:16192:45047:7118:6897:71…
8152	metabolic process	83 out of 92 genes, 90.2%	3509 out of 7288 background genes, 48.1%	3.77e-15	SSA1:CYS3:FUN12:CDC19:ATP3:HSP26:GRS1:SUP45:PGI1:ARO4:PGK1:THR4:NHP2:SSB1:BMH2:HOM2:TRR1:EFT2:SAM2:RPL12A:CHZ1:SAH1:ERG28:HOR2:MET6:PAB1:BMH1:HSP12:OLE1:ARC1:RPL1B:RPL9A:HXK2:ACB1:ERG25:NSR1:RNR4:TRX2:PFK1:RPL8A:SBP1:ERG11:SSZ1:DYS1:LYS12:TPM2:TIF2:ATP2:HOM6:FBA1:MDH1:SBA1:SHM2:YEF3:RPS1B:ERG13:ERG5:HSC82:PFK2:RPL20A:TIF11:PBI2:POR1:YDJ1:LYS9:RPP2A:CDC33:RPL3:RPS28A:BFR1:RPB10:CAF20:NOP58:GDH1:ER…	15986:8295:6006:74:8298:30468:6114:6696:77:51083:103:18065:43248:19878:6260:6261:6409:6338:9060:8154:1321:6446:30503:6730:6448:6626:184:30433:6555:723:30437:16071:6013:6950:84:5975:5977:46015:6887:6888:16259:6412:6413:6414:6090:6415:19413:1:6418:6450:6094:154:42493:11:6096:6631:1402:6098:19346:6633:6811:6099:6383:9073:6457:6458:6636:42026:6566:910:45944:7005:6890:32445:96:16192:45047:7118:6897:71…
9058	biosynthetic process	49 out of 92 genes, 53.3%	1220 out of 7288 background genes, 16.7%	3.96e-13	SSA1:FUN12:ATP3:GRS1:SUP45:PGI1:ARO4:PGK1:SSB1:HOM2:EFT2:RPL12A:ERG28:HOR2:MET6:PAB1:ARC1:RPL1B:RPL9A:ERG25:RPL8A:ERG11:SSZ1:DYS1:LYS12:TIF2:ATP2:HOM6:FBA1:YEF3:RPS1B:ERG13:ERG5:RPL20A:TIF11:LYS9:RPP2A:CDC33:RPL3:RPS28A:CAF20:GDH1:ERG10:CAM1:ALD6:RPL5:FAS2:SPE3:RPL11A	15986:8295:74:6114:6696:51083:18065:19878:6409:1321:6446:6448:6626:184:6555:723:6950:5975:6412:6413:6414:6415:19413:6418:6450:6094:42493:6096:6098:6633:9073:6457:42026:6566:910:6353:6426:6537:27:9085:60:9086:6970:42254:17148:15940:6616:8612:9090
44238	primary metabolic process	77 out of 92 genes, 83.7%	3207 out of 7288 background genes, 44.0%	1.51e-12	SSA1:CYS3:FUN12:CDC19:ATP3:HSP26:GRS1:SUP45:PGI1:ARO4:PGK1:THR4:NHP2:SSB1:BMH2:HOM2:EFT2:SAM2:RPL12A:CHZ1:SAH1:ERG28:HOR2:MET6:PAB1:BMH1:OLE1:ARC1:RPL1B:RPL9A:HXK2:ACB1:ERG25:NSR1:RNR4:TRX2:PFK1:RPL8A:SBP1:ERG11:SSZ1:DYS1:LYS12:TIF2:ATP2:HOM6:FBA1:MDH1:SBA1:YEF3:RPS1B:ERG13:ERG5:HSC82:PFK2:RPL20A:TIF11:PBI2:YDJ1:LYS9:RPP2A:CDC33:RPL3:RPS28A:BFR1:RPB10:CAF20:NOP58:GDH1:ERG10:CAM1:SSE1:RPL5:FAS2:NH…	15986:8295:6006:74:6114:6696:77:51083:103:18065:43248:19878:6260:6261:6409:6338:1321:30503:6446:6448:6626:184:30433:6555:723:30437:16071:6013:6950:84:5975:5977:46015:6888:16259:6412:6413:6414:6090:6415:1:6418:6450:6094:154:42493:11:6096:6631:1402:6098:19346:6633:6099:6383:9073:6457:6458:6636:42026:6566:910:45944:6890:32445:96:45047:6897:6353:6426:1302:30162:6534:6357:7265:6359:6537:7088:27:9085:2…
9987	cellular process	88 out of 92 genes, 95.7%	4701 out of 7288 background genes, 64.5%	3.19e-10	SSA1:CYS3:FUN12:CDC19:ATP3:HSP26:PHO88:GRS1:VMA2:SUP45:PGI1:ARO4:PGK1:THR4:NHP2:SSB1:SED1:SSS1:BMH2:HOM2:TRR1:EFT2:NPL3:SAM2:RPL12A:CHZ1:SAH1:ERG28:HOR2:MET6:PAB1:BMH1:HSP12:OLE1:ARC1:RPL1B:RPL9A:HXK2:ACB1:ERG25:NSR1:RNR4:TRX2:PFK1:RPL8A:SBP1:ERG11:SSZ1:DYS1:LYS12:TPM2:TIF2:ATP2:HOM6:FBA1:MDH1:SBA1:SHM2:YEF3:RPS1B:ERG13:ERG5:HSC82:PFK2:RPL20A:TIF11:PBI2:POR1:YDJ1:LYS9:RPP2A:CDC33:RPL3:RPS28A:BFR1…	8295:8298:30468:6114:6696:51083:18065:19878:6260:6406:6261:6409:6620:6338:8154:1321:6626:6555:723:5975:5977:16259:6412:6413:6414:6415:1:2:6418:31204:154:42493:6631:1402:6633:6636:6566:7005:32445:16192:45047:7155:6353:6426:6357:6359:7088:9408:60:42144:30490:9269:7015:17148:6360:15909:6364:6365:6366:8612:6000:15986:6006:74:6874:77:103:43248:9060:30503:6446:6730:6448:30433:184:30437:6950:6013:16071:…
44249	cellular biosynthetic process	43 out of 92 genes, 46.7%	1143 out of 7288 background genes, 15.7%	8.03e-10	SSA1:FUN12:ATP3:GRS1:SUP45:PGI1:ARO4:PGK1:SSB1:HOM2:EFT2:RPL12A:HOR2:MET6:PAB1:ARC1:RPL1B:RPL9A:RPL8A:SSZ1:DYS1:LYS12:TIF2:ATP2:HOM6:FBA1:YEF3:RPS1B:RPL20A:TIF11:LYS9:RPP2A:CDC33:RPL3:RPS28A:CAF20:GDH1:CAM1:ALD6:RPL5:FAS2:SPE3:RPL11A	8295:6114:51083:18065:19878:6409:1321:6626:6555:723:5975:6412:6413:6414:6415:6418:42493:6633:6566:6353:6426:60:17148:8612:15986:74:6446:6448:184:6950:19413:6450:6094:6096:6098:9073:6457:42026:910:6537:27:9085:9086:6970:42254:15940:6616:9090
19752	carboxylic acid metabolic process	22 out of 92 genes, 23.9%	308 out of 7288 background genes, 4.2%	8.57e-09	CYS3:CDC19:GRS1:PGI1:ARO4:PGK1:THR4:HOM2:SAM2:SAH1:MET6:OLE1:ARC1:ACB1:LYS12:HOM6:FBA1:MDH1:LYS9:GDH1:ALD6:FAS2	18065:19878:6409:6555:16259:1:6418:42493:6631:6633:6636:6566:6353:6426:15909:6090:19413:6094:6096:6098:19346:6099:9073:96:6897:6534:6537:9085:9086:6108:9090
6082	organic acid metabolic process	22 out of 92 genes, 23.9%	308 out of 7288 background genes, 4.2%	8.57e-09	CYS3:CDC19:GRS1:PGI1:ARO4:PGK1:THR4:HOM2:SAM2:SAH1:MET6:OLE1:ARC1:ACB1:LYS12:HOM6:FBA1:MDH1:LYS9:GDH1:ALD6:FAS2	18065:19878:6409:6555:16259:1:6418:42493:6631:6633:6636:6566:6353:6426:15909:6090:19413:6094:6096:6098:19346:6099:9073:96:6897:6534:6537:9085:9086:6108:9090
6096	glycolysis	7 out of 92 genes, 7.6%	24 out of 7288 background genes, 0.3%	5.71e-06	CDC19:PGI1:PGK1:HXK2:PFK1:FBA1:PFK2	32445:6000:6006:6013:46015:6090:6094:6096:6098:1302:46323:8361
6066	alcohol metabolic process	14 out of 92 genes, 15.2%	163 out of 7288 background genes, 2.2%	6.04e-06	CDC19:PGI1:PGK1:ERG28:HOR2:HXK2:ERG25:PFK1:ERG11:FBA1:ERG13:ERG5:PFK2:ERG10	6114:6696:5975:32445:6000:6006:6013:46015:6090:6094:6096:6098:1302:6970:46323:8361
6519	amino acid and derivative metabolic process	15 out of 92 genes, 16.3%	200 out of 7288 background genes, 2.7%	1.1e-05	CYS3:GRS1:ARO4:THR4:HOM2:SAM2:SAH1:MET6:ARC1:DYS1:LYS12:HOM6:LYS9:GDH1:SPE3	8295:19878:6409:6555:16259:6418:42493:6566:6353:6426:8612:19346:9073:96:6897:6534:6537:9085:9086:15940:9090
9066	aspartate family amino acid metabolic process	8 out of 92 genes, 8.7%	45 out of 7288 background genes, 0.6%	3.37e-05	THR4:HOM2:SAM2:SAH1:MET6:LYS12:HOM6:LYS9	19878:6555:16259:42493:6566:6897:9085:9086:9090
6007	glucose catabolic process	7 out of 92 genes, 7.6%	34 out of 7288 background genes, 0.5%	8.01e-05	CDC19:PGI1:PGK1:HXK2:PFK1:FBA1:PFK2	32445:6000:6006:6013:46015:6090:6094:6096:6098:1302:46323:8361
6412	translation	26 out of 92 genes, 28.3%	684 out of 7288 background genes, 9.4%	8.28e-05	SSA1:FUN12:GRS1:SUP45:SSB1:EFT2:RPL12A:PAB1:ARC1:RPL1B:RPL9A:RPL8A:SSZ1:TIF2:YEF3:RPS1B:RPL20A:TIF11:RPP2A:CDC33:RPL3:RPS28A:CAF20:CAM1:RPL5:RPL11A	51083:6409:6626:723:6412:6413:6414:6415:6418:6353:6426:60:17148:74:6446:6448:184:6950:6450:6457:42026:910:27:42254:6616
19320	hexose catabolic process	7 out of 92 genes, 7.6%	37 out of 7288 background genes, 0.5%	0.00014	CDC19:PGI1:PGK1:HXK2:PFK1:FBA1:PFK2	32445:6000:6006:6013:46015:6090:6094:6096:6098:1302:46323:8361
6520	amino acid metabolic process	13 out of 92 genes, 14.1%	185 out of 7288 background genes, 2.5%	0.00022	CYS3:GRS1:ARO4:THR4:HOM2:SAM2:SAH1:MET6:ARC1:LYS12:HOM6:LYS9:GDH1	19878:6409:6555:16259:6418:42493:6566:6353:6426:19346:9073:96:6897:6534:6537:9085:9086:9090
9059	macromolecule biosynthetic process	29 out of 92 genes, 31.5%	872 out of 7288 background genes, 12.0%	0.00022	SSA1:FUN12:GRS1:SUP45:PGI1:PGK1:SSB1:EFT2:RPL12A:PAB1:ARC1:RPL1B:RPL9A:RPL8A:SSZ1:TIF2:FBA1:YEF3:RPS1B:RPL20A:TIF11:RPP2A:CDC33:RPL3:RPS28A:CAF20:CAM1:RPL5:RPL11A	51083:6409:6626:723:6412:6413:6414:6415:6418:6353:6426:60:17148:74:6446:6448:184:6950:6450:6094:6096:6098:6457:42026:910:27:42254:6616
9308	amine metabolic process	14 out of 92 genes, 15.2%	223 out of 7288 background genes, 3.1%	0.0003	CYS3:GRS1:ARO4:THR4:HOM2:SAM2:SAH1:MET6:ARC1:LYS12:HOM6:LYS9:GDH1:SPE3	8295:19878:6409:6555:16259:6418:42493:6566:6353:6426:19346:9073:96:6897:6534:6537:9085:9086:15940:9090
6696	ergosterol biosynthetic process	6 out of 92 genes, 6.5%	26 out of 7288 background genes, 0.4%	0.00031	ERG28:ERG25:ERG11:ERG13:ERG5:ERG10	6696
8204	ergosterol metabolic process	6 out of 92 genes, 6.5%	26 out of 7288 background genes, 0.4%	0.00031	ERG28:ERG25:ERG11:ERG13:ERG5:ERG10	6696
46365	monosaccharide catabolic process	7 out of 92 genes, 7.6%	42 out of 7288 background genes, 0.6%	0.00037	CDC19:PGI1:PGK1:HXK2:PFK1:FBA1:PFK2	32445:6000:6006:6013:46015:6090:6094:6096:6098:1302:46323:8361
46164	alcohol catabolic process	7 out of 92 genes, 7.6%	45 out of 7288 background genes, 0.6%	0.0006	CDC19:PGI1:PGK1:HXK2:PFK1:FBA1:PFK2	32445:6000:6006:6013:46015:6090:6094:6096:6098:1302:46323:8361
6807	nitrogen compound metabolic process	14 out of 92 genes, 15.2%	244 out of 7288 background genes, 3.3%	0.00091	CYS3:GRS1:ARO4:THR4:HOM2:SAM2:SAH1:MET6:ARC1:LYS12:HOM6:LYS9:GDH1:SPE3	8295:19878:6409:6555:16259:6418:42493:6566:6353:6426:19346:9073:96:6897:6534:6537:9085:9086:15940:9090
16126	sterol biosynthetic process	6 out of 92 genes, 6.5%	32 out of 7288 background genes, 0.4%	0.00115	ERG28:ERG25:ERG11:ERG13:ERG5:ERG10	6696
6694	steroid biosynthetic process	6 out of 92 genes, 6.5%	32 out of 7288 background genes, 0.4%	0.00115	ERG28:ERG25:ERG11:ERG13:ERG5:ERG10	6696
96	sulfur amino acid metabolic process	6 out of 92 genes, 6.5%	32 out of 7288 background genes, 0.4%	0.00115	CYS3:HOM2:SAM2:SAH1:MET6:HOM6	6555:16259:42493:6566:19346:96:6534:9086:9090
42026	protein refolding	4 out of 92 genes, 4.3%	9 out of 7288 background genes, 0.1%	0.00138	SSA1:HSC82:YDJ1:SSE1	6626:723:6412:42493:45047:60:43248:30433:6950:6457:6458:42026:6616
6555	methionine metabolic process	5 out of 92 genes, 5.4%	23 out of 7288 background genes, 0.3%	0.00391	HOM2:SAM2:SAH1:MET6:HOM6	6555:16259:42493:6566:9086:9090
22618	protein-RNA complex assembly	10 out of 92 genes, 10.9%	140 out of 7288 background genes, 1.9%	0.00453	FUN12:RPL12A:PAB1:NSR1:TIF2:TIF11:CDC33:RPL3:RPL5:RPL11A	723:6412:6413:6364:74:6446:184:27:28
43170	macromolecule metabolic process	56 out of 92 genes, 60.9%	2801 out of 7288 background genes, 38.4%	0.00472	SSA1:FUN12:CDC19:HSP26:GRS1:SUP45:PGI1:PGK1:NHP2:SSB1:BMH2:EFT2:RPL12A:CHZ1:HOR2:PAB1:BMH1:ARC1:RPL1B:RPL9A:HXK2:NSR1:RNR4:TRX2:PFK1:RPL8A:SBP1:SSZ1:DYS1:TPM2:TIF2:FBA1:MDH1:SBA1:YEF3:RPS1B:HSC82:PFK2:RPL20A:TIF11:PBI2:YDJ1:RPP2A:CDC33:RPL3:RPS28A:BFR1:RPB10:CAF20:NOP58:CAM1:SSE1:RPL5:FAS2:NHP6A:RPL11A	8298:30468:6114:51083:18065:6260:6261:6409:6338:8154:6626:723:5975:5977:6412:6413:6414:6415:1:6418:42493:154:1402:6633:32445:16192:45047:6353:6426:6357:6359:7088:60:42144:30490:7015:17148:6360:6364:6365:6366:8612:6000:6006:74:77:103:43248:30503:6446:6448:184:30433:30437:16071:6013:6950:84:46015:6887:6888:6090:6450:6094:11:6096:6098:6099:6383:6457:6458:42026:910:45944:6890:7118:7119:1302:30162:726…
16125	sterol metabolic process	6 out of 92 genes, 6.5%	42 out of 7288 background genes, 0.6%	0.00605	ERG28:ERG25:ERG11:ERG13:ERG5:ERG10	6696
6417	regulation of translation	6 out of 92 genes, 6.5%	42 out of 7288 background genes, 0.6%	0.00605	SSB1:PAB1:SSZ1:TIF2:CAF20:CAM1	51083:6412:6413:17148:6446:6448:6450
44260	cellular macromolecule metabolic process	37 out of 92 genes, 40.2%	1506 out of 7288 background genes, 20.7%	0.00649	SSA1:FUN12:HSP26:GRS1:SUP45:SSB1:BMH2:EFT2:RPL12A:PAB1:BMH1:ARC1:RPL1B:RPL9A:RPL8A:SSZ1:DYS1:TPM2:TIF2:SBA1:YEF3:RPS1B:HSC82:RPL20A:TIF11:PBI2:YDJ1:RPP2A:CDC33:RPL3:RPS28A:CAF20:CAM1:SSE1:RPL5:FAS2:RPL11A	8298:30468:51083:18065:6409:8154:6626:723:5977:6412:6413:6414:6415:1:6418:42493:1402:6633:16192:45047:6353:6426:60:42144:7015:17148:8612:74:77:43248:6446:6448:184:30433:30437:6950:6887:6450:11:6457:6458:42026:910:7118:7119:30162:7265:27:45011:42254:7124:51436:6616
6006	glucose metabolic process	7 out of 92 genes, 7.6%	64 out of 7288 background genes, 0.9%	0.0068	CDC19:PGI1:PGK1:HXK2:PFK1:FBA1:PFK2	32445:6000:6006:6013:46015:6090:6094:6096:6098:1302:46323:8361
8202	steroid metabolic process	6 out of 92 genes, 6.5%	43 out of 7288 background genes, 0.6%	0.00697	ERG28:ERG25:ERG11:ERG13:ERG5:ERG10	6696
51246	regulation of protein metabolic process	7 out of 92 genes, 7.6%	66 out of 7288 background genes, 0.9%	0.00836	SSB1:PAB1:SSZ1:TIF2:PBI2:CAF20:CAM1	51083:6412:6413:42144:17148:6446:6448:6450:30162
6790	sulfur metabolic process	7 out of 92 genes, 7.6%	66 out of 7288 background genes, 0.9%	0.00836	CYS3:HOM2:SAM2:SAH1:MET6:TRX2:HOM6	6261:6555:16259:42493:6566:42144:103:30503:6888:11:19346:6890:96:6534:9086:6979:9090
Function
GOID	GO_term	Cluster frequency	Background frequency	P-value	Gene(s) annotated to the term	Directly Annotated GOID List
45182	translation regulator activity	9 out of 92 genes, 9.8%	57 out of 7288 background genes, 0.8%	4.88e-06	FUN12:SUP45:EFT2:TIF2:YEF3:TIF11:CDC33:CAF20:CAM1	16149:3743:45182:3746:3924:3724
8135	translation factor activity, nucleic acid binding	8 out of 92 genes, 8.7%	46 out of 7288 background genes, 0.6%	1.36e-05	FUN12:SUP45:EFT2:TIF2:YEF3:TIF11:CDC33:CAM1	16149:3743:3746:3924:3724
16491	oxidoreductase activity	14 out of 92 genes, 15.2%	265 out of 7288 background genes, 3.6%	0.0008	HOM2:TRR1:OLE1:ERG25:RNR4:TRX2:ERG11:LYS12:HOM6:MDH1:LYS9:GDH1:ALD6:FAS2	4028:30060:4315:4412:47046:4316:4073:8897:254:8398:4755:4748:4354:4791:30508:4768
3824	catalytic activity	43 out of 92 genes, 46.7%	1988 out of 7288 background genes, 27.3%	0.0076	SSA1:CYS3:FUN12:CDC19:GRS1:VMA2:PGI1:ARO4:PGK1:THR4:SSB1:HOM2:TRR1:SAM2:SAH1:HOR2:MET6:PMA1:OLE1:HXK2:ERG25:RNR4:TRX2:PFK1:ERG11:DYS1:LYS12:TIF2:HOM6:FBA1:MDH1:SHM2:ERG13:ERG5:HSC82:PFK2:LYS9:RPB10:GDH1:ERG10:ALD6:FAS2:SPE3	4028:3985:3899:4315:4316:4421:4332:51082:121:46961:4354:42623:4372:4820:47046:4396:8897:254:4755:3849:4013:30508:4791:4123:4795:8553:16887:4412:4073:8398:4347:3724:4618:3743:30060:3924:4743:4478:3871:3872:4748:16765:249:4766:4768
Component
GOID	GO_term	Cluster frequency	Background frequency	P-value	Gene(s) annotated to the term	Directly Annotated GOID List
44424	intracellular part	91 out of 92 genes, 98.9%	5052 out of 7288 background genes, 69.3%	1.07e-11	SSA1:CYS3:FUN12:CDC19:YBR025C:ATP3:HSP26:PHO88:GRS1:VMA2:SUP45:PGI1:ARO4:PGK1:THR4:NHP2:SSB1:PST2:SED1:SSS1:BMH2:HOM2:RTN1:TRR1:EFT2:NPL3:RPL12A:CHZ1:SAH1:ERG28:HOR2:MET6:PAB1:BMH1:HSP12:PMA1:OLE1:ARC1:RPL1B:RPL9A:HXK2:ACB1:ERG25:NSR1:RNR4:TRX2:PFK1:RPL8A:SBP1:ERG11:SSZ1:DYS1:LYS12:TPM2:TIF2:ATP2:HOM6:FBA1:MDH1:SBA1:SHM2:YEF3:RPS1B:ERG13:ERG5:HSC82:PFK2:RPL20A:TIF11:PBI2:POR1:YDJ1:LYS9:RPP2A:CDC3…	5945:5678:5783:31428:5784:30482:9277:48471:5789:42175:790:16281:142:324:5730:18444:5625:5732:31307:329:5840:5736:5842:5737:5665:5754:17102:5843:5666:5739:5844:5845:5829:5756:5759:30529:5792:5971:5794:45121:5886:221:5634:31206:5830:5741:16020:5832:5835
5622	intracellular	91 out of 92 genes, 98.9%	5087 out of 7288 background genes, 69.8%	1.99e-11	SSA1:CYS3:FUN12:CDC19:YBR025C:ATP3:HSP26:PHO88:GRS1:VMA2:SUP45:PGI1:ARO4:PGK1:THR4:NHP2:SSB1:PST2:SED1:SSS1:BMH2:HOM2:RTN1:TRR1:EFT2:NPL3:RPL12A:CHZ1:SAH1:ERG28:HOR2:MET6:PAB1:BMH1:HSP12:PMA1:OLE1:ARC1:RPL1B:RPL9A:HXK2:ACB1:ERG25:NSR1:RNR4:TRX2:PFK1:RPL8A:SBP1:ERG11:SSZ1:DYS1:LYS12:TPM2:TIF2:ATP2:HOM6:FBA1:MDH1:SBA1:SHM2:YEF3:RPS1B:ERG13:ERG5:HSC82:PFK2:RPL20A:TIF11:PBI2:POR1:YDJ1:LYS9:RPP2A:CDC3…	5945:5678:5783:31428:5784:30482:9277:48471:5789:42175:790:16281:142:324:5730:5625:18444:5732:31307:5840:329:5736:5842:5737:5665:5754:17102:5843:5666:5844:5739:5845:5756:5829:5759:30529:5792:5971:5794:45121:5886:221:31206:5634:5830:5741:16020:5832:5835
5737	cytoplasm	80 out of 92 genes, 87.0%	3694 out of 7288 background genes, 50.7%	2.28e-11	SSA1:CYS3:FUN12:CDC19:YBR025C:ATP3:HSP26:PHO88:GRS1:VMA2:SUP45:PGI1:ARO4:PGK1:THR4:PST2:SED1:SSS1:HOM2:RTN1:TRR1:EFT2:NPL3:RPL12A:SAH1:ERG28:HOR2:MET6:PAB1:HSP12:PMA1:OLE1:ARC1:RPL1B:RPL9A:HXK2:ACB1:ERG25:NSR1:RNR4:TRX2:PFK1:RPL8A:ERG11:SSZ1:DYS1:LYS12:TPM2:TIF2:ATP2:HOM6:FBA1:MDH1:SBA1:SHM2:YEF3:RPS1B:ERG13:ERG5:HSC82:PFK2:RPL20A:TIF11:PBI2:POR1:YDJ1:LYS9:RPP2A:CDC33:RPL3:RPS28A:GDH1:ERG10:CAM1:…	5945:5783:5784:30482:9277:48471:5789:16281:142:5625:324:5730:18444:31307:5840:329:5842:5737:5754:17102:5843:5739:5756:5829:5759:5792:5971:5794:45121:5886:221:31206:5634:5830:5741:16020:5832:5835
44464	cell part	91 out of 92 genes, 98.9%	5495 out of 7288 background genes, 75.4%	1.94e-08	SSA1:CYS3:FUN12:CDC19:YBR025C:ATP3:HSP26:PHO88:GRS1:VMA2:SUP45:PGI1:ARO4:PGK1:THR4:NHP2:SSB1:PST2:SED1:SSS1:BMH2:HOM2:RTN1:TRR1:EFT2:NPL3:RPL12A:CHZ1:SAH1:ERG28:HOR2:MET6:PAB1:BMH1:HSP12:PMA1:OLE1:ARC1:RPL1B:RPL9A:HXK2:ACB1:ERG25:NSR1:RNR4:TRX2:PFK1:RPL8A:SBP1:ERG11:SSZ1:DYS1:LYS12:TPM2:TIF2:ATP2:HOM6:FBA1:MDH1:SBA1:SHM2:YEF3:RPS1B:ERG13:ERG5:HSC82:PFK2:RPL20A:TIF11:PBI2:POR1:YDJ1:LYS9:RPP2A:CDC3…	5945:5678:5783:31428:5784:30482:9277:48471:5789:42175:790:16281:142:324:5730:5625:18444:5732:31307:5840:329:5736:5842:5737:5665:5754:17102:5843:5666:5844:5739:5845:5756:5829:5759:30529:5792:5971:5794:45121:5886:221:31206:5634:5830:5741:16020:5832:5835
44445	cytosolic part	16 out of 92 genes, 17.4%	197 out of 7288 background genes, 2.7%	3.27e-07	SSA1:FUN12:RPL12A:RPL1B:RPL9A:PFK1:RPL8A:RPS1B:PFK2:RPL20A:RPP2A:RPL3:RPS28A:CAM1:RPL5:RPL11A	5945:9277:329:5842:5737:5843:5739:5634:5830:5832
5840	ribosome	20 out of 92 genes, 21.7%	357 out of 7288 background genes, 4.9%	1.74e-06	FUN12:SED1:EFT2:RPL12A:PAB1:RPL1B:RPL9A:RPL8A:TIF2:YEF3:RPS1B:RPL20A:TIF11:RPP2A:CDC33:RPL3:RPS28A:CAM1:RPL5:RPL11A	9277:16281:5840:5737:5842:5843:5739:5634:5830
5829	cytosol	25 out of 92 genes, 27.2%	617 out of 7288 background genes, 8.5%	1.31e-05	SSA1:FUN12:CDC19:SUP45:PGI1:RPL12A:RPL1B:RPL9A:HXK2:TRX2:PFK1:RPL8A:FBA1:RPS1B:PFK2:RPL20A:YDJ1:RPP2A:RPL3:RPS28A:ERG10:CAM1:ALD6:RPL5:RPL11A	5945:9277:48471:324:18444:329:5842:5737:5843:5739:5829:5792:5634:5830:5832
5830	cytosolic ribosome (sensu Eukaryota)	13 out of 92 genes, 14.1%	176 out of 7288 background genes, 2.4%	3.69e-05	FUN12:RPL12A:RPL1B:RPL9A:RPL8A:RPS1B:RPL20A:RPP2A:RPL3:RPS28A:CAM1:RPL5:RPL11A	5842:5843:5739:5830
30529	ribonucleoprotein complex	24 out of 92 genes, 26.1%	618 out of 7288 background genes, 8.5%	5.64e-05	FUN12:NHP2:SSB1:SED1:EFT2:RPL12A:PAB1:RPL1B:RPL9A:RPL8A:TIF2:YEF3:RPS1B:RPL20A:TIF11:RPP2A:CDC33:RPL3:RPS28A:BFR1:NOP58:CAM1:RPL5:RPL11A	31428:9277:42175:16281:5625:5732:5840:5737:5842:5843:5844:5739:30529:5634:5830
44444	cytoplasmic part	57 out of 92 genes, 62.0%	2700 out of 7288 background genes, 37.0%	0.00013	SSA1:FUN12:CDC19:ATP3:PHO88:GRS1:VMA2:SUP45:PGI1:PGK1:PST2:SED1:SSS1:RTN1:EFT2:RPL12A:ERG28:PAB1:PMA1:OLE1:RPL1B:RPL9A:HXK2:ERG25:NSR1:RNR4:TRX2:PFK1:RPL8A:ERG11:LYS12:TPM2:TIF2:ATP2:FBA1:MDH1:YEF3:RPS1B:ERG13:ERG5:HSC82:PFK2:RPL20A:TIF11:PBI2:POR1:YDJ1:RPP2A:CDC33:RPL3:RPS28A:ERG10:CAM1:ALD6:RPL5:FAS2:RPL11A	5945:5783:5784:30482:9277:48471:5789:16281:142:5625:324:5730:18444:31307:5840:329:5842:5737:5754:5843:5739:5756:5829:5759:5792:5971:5794:45121:5886:221:31206:5634:5830:5741:16020:5832:5835
43229	intracellular organelle	73 out of 92 genes, 79.3%	4021 out of 7288 background genes, 55.2%	0.00013	SSA1:FUN12:ATP3:HSP26:PHO88:GRS1:VMA2:PGI1:ARO4:PGK1:THR4:NHP2:PST2:SED1:SSS1:BMH2:HOM2:RTN1:EFT2:NPL3:RPL12A:CHZ1:ERG28:HOR2:PAB1:BMH1:HSP12:PMA1:OLE1:RPL1B:RPL9A:HXK2:ACB1:ERG25:NSR1:RNR4:TRX2:PFK1:RPL8A:SBP1:ERG11:LYS12:TPM2:TIF2:ATP2:HOM6:FBA1:MDH1:SBA1:YEF3:RPS1B:ERG13:ERG5:HSC82:PFK2:RPL20A:TIF11:PBI2:POR1:RPP2A:CDC33:RPL3:RPS28A:RPB10:NOP58:GDH1:CAM1:ALD6:RPL5:FAS2:NHP6A:SPE3:RPL11A	5945:5678:5783:31428:5784:30482:9277:5789:790:16281:142:5625:324:5730:5732:31307:5840:329:5736:5842:5737:5665:5754:5843:5666:5739:5829:5756:5759:5971:5794:45121:5886:221:31206:5634:5830:5741:16020:5832:5835
43226	organelle	73 out of 92 genes, 79.3%	4022 out of 7288 background genes, 55.2%	0.00013	SSA1:FUN12:ATP3:HSP26:PHO88:GRS1:VMA2:PGI1:ARO4:PGK1:THR4:NHP2:PST2:SED1:SSS1:BMH2:HOM2:RTN1:EFT2:NPL3:RPL12A:CHZ1:ERG28:HOR2:PAB1:BMH1:HSP12:PMA1:OLE1:RPL1B:RPL9A:HXK2:ACB1:ERG25:NSR1:RNR4:TRX2:PFK1:RPL8A:SBP1:ERG11:LYS12:TPM2:TIF2:ATP2:HOM6:FBA1:MDH1:SBA1:YEF3:RPS1B:ERG13:ERG5:HSC82:PFK2:RPL20A:TIF11:PBI2:POR1:RPP2A:CDC33:RPL3:RPS28A:RPB10:NOP58:GDH1:CAM1:ALD6:RPL5:FAS2:NHP6A:SPE3:RPL11A	5945:5678:5783:31428:5784:30482:9277:5789:790:16281:142:5625:324:5730:5732:31307:5840:329:5736:5842:5737:5665:5754:5843:5666:5739:5829:5756:5759:5971:5794:45121:5886:221:31206:5634:5830:5741:16020:5832:5835
5842	cytosolic large ribosomal subunit (sensu Eukaryota)	9 out of 92 genes, 9.8%	97 out of 7288 background genes, 1.3%	0.00045	RPL12A:RPL1B:RPL9A:RPL8A:RPL20A:RPP2A:RPL3:RPL5:RPL11A	5842
32991	macromolecular complex	38 out of 92 genes, 41.3%	1626 out of 7288 background genes, 22.3%	0.00448	SSA1:FUN12:ATP3:VMA2:SUP45:NHP2:SSB1:SED1:SSS1:EFT2:RPL12A:CHZ1:PAB1:ARC1:RPL1B:RPL9A:RNR4:PFK1:RPL8A:TIF2:ATP2:YEF3:RPS1B:PFK2:RPL20A:TIF11:RPP2A:CDC33:RPL3:RPS28A:BFR1:RPB10:CAF20:NOP58:CAM1:RPL5:FAS2:RPL11A	5945:5678:31428:5784:9277:5789:42175:16281:5625:18444:5732:5840:329:5736:5842:5737:5665:5754:17102:5843:5666:5844:5739:5845:5829:5756:30529:5971:221:31206:5634:5830:5832:5835
15934	large ribosomal subunit	9 out of 92 genes, 9.8%	142 out of 7288 background genes, 1.9%	0.00988	RPL12A:RPL1B:RPL9A:RPL8A:RPL20A:RPP2A:RPL3:RPL5:RPL11A	5842
