# Supplementary material for: Determinants of Protein Abundance and Translation Efficiency in S. cerevisiae
Source: PLoS Comput Biol. 2007 Dec 21;3(12):e248. doi: 10.1371/journal.pcbi.0030248 (PMC2230678; doi:10.1371/journal.pcbi.0030248)
Supplement: Table S5 — The list of genes in each cluster and bi-cluster is depicted together with the GO enrichment categories (for each of the ontologies: process, function, and component) of each cluster/bi-cluster. The score of each bi-cluster (by Expander) is depicted near the name of the bi-cluster (as mentioned by the authors of the pertaining Expander software used there, these scores are good only for comparing bi-clusters with the same size). The mean pattern of each bi-cluster and the index of conditions that are related to it (x-axis) appear near each bi-cluster. (3 MB XLS) [file pcbi.0030248.st005.xls]

## Sheet: Sheet1
Table S4 A: Clustering (sheet 1) and bi-clustering (sheet 2) of the mRNA gene
expression from the work of Tu et al. The list of genes in each cluster and
bi-cluster is depicted together with the GO enrichment categories (for each of the
ontologies: Process, Function, and Component) of each cluster/bi-cluster.
The score of each bi-cluster (by Expander) is depicted near the name of the bi-cluster (As mentioned by the authors of the pertaining Expander software used there, these scores are good only for comparing bi-clusters with the same size).
The mean pattern of each bi-cluster and the index of conditions that are related to it (x-axis) appear near each bi-cluster
Clusters
Cluster 1
Genes
YNL141W	AAH1	YNL141W
YGL119W	ABC1	YGL119W
YBR236C	ABD1	YBR236C
YAR015W	ADE1	YAR015W
YNL220W	ADE12	YNL220W
YOR128C	ADE2	YOR128C
YGR204W	ADE3	YGR204W
YMR300C	ADE4	YMR300C
YGL234W	"ADE5	YGL234W
YDR408C	ADE8	YDR408C
YDL178W	DLD2	YDL178W
YML035C	AMD1	YML035C
YEL036C	ANP1	YEL036C
YCL050C	APA1	YCL050C
YBR288C	APM3	YBR288C
YML022W	APT1	YML022W
YDR441C	APT2	YDR441C
YGL105W	ARC1	YGL105W
YHR013C	ARD1	YHR013C
YBR249C	ARO4	YBR249C
YPR060C	ARO7	YPR060C
YPR034W	ARP7	YPR034W
YDL088C	ASM4	YDL088C
YBL069W	AST1	YBL069W
YMR301C	ATM1	YMR301C
YKL004W	AUR1	YKL004W
YER114C	BOI2	YER114C
YER172C	BRR2	YER172C
YML102W	CAC2	YML102W
YOR276W	CAF20	YOR276W
YEL063C	CAN1	YEL063C
YIL043C	CBR1	YIL043C
YER168C	CCA1	YER168C
YHR107C	CDC12	YHR107C
YFR028C	CDC14	YFR028C
YOL139C	CDC33	YOL139C
YDR364C	CDC40	YDR364C
YLR418C	CDC73	YLR418C
YIL035C	CKA1	YIL035C
YGL019W	CKB1	YGL019W
YNL298W	CLA4	YNL298W
YDL145C	COP1	YDL145C
YJR032W	CPR7	YJR032W
YGL238W	CSE1	YGL238W
YKL139W	CTK1	YKL139W
YML112W	CTK3	YML112W
YPR124W	CTR1	YPR124W
YCR054C	CTR86	YCR054C
YOL145C	CTR9	YOL145C
YGR036C	CAX4	YGR036C
YNL111C	CYB5	YNL111C
YAL039C	CYC3	YAL039C
YAL012W	CYS3	YAL012W
YML113W	DAT1	YML113W
YGL078C	DBP3	YGL078C
YNR038W	DBP6	YNR038W
YHR169W	DBP8	YHR169W
YFL001W	DEG1	YFL001W
YPL049C	DIG1	YPL049C
YNL186W	UBP10	YNL186W
YKL191W	DPH2	YKL191W
YBR252W	DUT1	YBR252W
YHR068W	DYS1	YHR068W
YAL059W	ECM1	YAL059W
YJR137C	ECM17	YJR137C
YER176W	ECM32	YER176W
YGL012W	ERG4	YGL012W
YJL168C	SET2	YJL168C
YMR277W	FCP1	YMR277W
YMR319C	FET4	YMR319C
YER145C	FTR1	YER145C
YCL011C	GBP2	YCL011C
YOR260W	GCD1	YOR260W
YJL125C	GCD14	YJL125C
YLR291C	GCD7	YLR291C
YGL195W	GCN1	YGL195W
YAL044C	GCV3	YAL044C
YEL042W	GDA1	YEL042W
YOR375C	GDH1	YOR375C
YLR200W	YKE2	YLR200W
YER122C	GLO3	YER122C
YPL091W	GLR1	YPL091W
YCR034W	FEN1	YCR034W
YOL059W	GPD2	YOL059W
YPL076W	GPI2	YPL076W
YDR331W	GPI8	YDR331W
YOL056W	GPM3	YOL056W
YBR121C	GRS1	YBR121C
YMR189W	GCV2	YMR189W
YML121W	GTR1	YML121W
YDR454C	GUK1	YDR454C
YOL064C	MET22	YOL064C
YJR069C	HAM1	YJR069C
YGR187C	HGH1	YGR187C
YGR191W	HIP1	YGR191W
YCL030C	HIS4	YCL030C
YIL020C	HIS6	YIL020C
YBR248C	HIS7	YBR248C
YJR147W	HMS2	YJR147W
YBR034C	HMT1	YBR034C
YJR075W	HOC1	YJR075W
YDR158W	HOM2	YDR158W
YER052C	HOM3	YER052C
YER062C	HOR2	YER062C
YDR399W	HPT1	YDR399W
YNL004W	HRB1	YNL004W
YPL204W	HRR25	YPL204W
YPR033C	HTS1	YPR033C
YBL076C	ILS1	YBL076C
YER086W	ILV1	YER086W
YJR016C	ILV3	YJR016C
YOL103W	ITR2	YOL103W
YBR017C	KAP104	YBR017C
YMR308C	PSE1	YMR308C
YER110C	KAP123	YER110C
YPL263C	KEL3	YPL263C
YPL145C	KES1	YPL145C
YGR229C	SMI1	YGR229C
YDR483W	KRE2	YDR483W
YPR159W	KRE6	YPR159W
YKL110C	KTI12	YKL110C
YMR296C	LCB1	YMR296C
YDR062W	LCB2	YDR062W
YDL051W	LHP1	YDL051W
YOR196C	LIP5	YOR196C
YKL205W	LOS1	YKL205W
YPR073C	LTP1	YPR073C
YIR034C	LYS1	YIR034C
YIL094C	LYS12	YIL094C
YNR050C	LYS9	YNR050C
YKL021C	MAK11	YKL021C
YPR051W	MAK3	YPR051W
YBL091C	MAP2	YBL091C
YBL023C	MCM2	YBL023C
YHR058C	MED6	YHR058C
YBR247C	ENP1	YBR247C
YGR264C	MES1	YGR264C
YIL128W	MET18	YIL128W
YJR010W	MET3	YJR010W
YER091C	MET6	YER091C
YML062C	MFT1	YML062C
YNL085W	MKT1	YNL085W
YDR245W	MNN10	YDR245W
YJL183W	MNN11	YJL183W
YPL050C	MNN9	YPL050C
YOR274W	MOD5	YOR274W
YKL009W	MRT4	YKL009W
YOR188W	MSB1	YOR188W
YOR370C	MRS6	YOR370C
YKR080W	MTD1	YKR080W
YOR160W	MTR10	YOR160W
YGR158C	MTR3	YGR158C
YGR007W	MUQ1	YGR007W
YGL122C	NAB2	YGL122C
YDL002C	NHP10	YDL002C
YDL208W	NHP2	YDL208W
YFR002W	NIC96	YFR002W
YPL211W	NIP7	YPL211W
YHR170W	NMD3	YHR170W
YJR132W	NMD5	YJR132W
YNL061W	NOP2	YNL061W
YPL043W	NOP4	YPL043W
YOR310C	NOP58	YOR310C
YLR197W	SIK1	YLR197W
YIL038C	NOT3	YIL038C
YDR432W	NPL3	YDR432W
YOR209C	NPT1	YOR209C
YDL167C	NRP1	YDL167C
YGR159C	NSR1	YGR159C
YOR098C	NUP1	YOR098C
YKL068W	NUP100	YKL068W
YKR082W	NUP133	YKR082W
YGL092W	NUP145	YGL092W
YML103C	NUP188	YML103C
YLR335W	NUP2	YLR335W
YGL172W	NUP49	YGL172W
YJL061W	NUP82	YJL061W
YDL116W	NUP84	YDL116W
YJR042W	NUP85	YJR042W
YER165W	PAB1	YER165W
YGR078C	PAC10	YGR078C
YBR279W	PAF1	YBR279W
YEL058W	PCM1	YEL058W
YOR360C	PDE2	YOR360C
YHR064C	SSZ1	YHR064C
YER149C	PEA2	YER149C
YJL179W	PFD1	YJL179W
YEL003W	GIM4	YEL003W
YNL153C	GIM3	YNL153C
YDL236W	PHO13	YDL236W
YBR106W	PHO88	YBR106W
YPR113W	PIS1	YPR113W
YGL008C	PMA1	YGL008C
YER132C	PMD1	YER132C
YAL023C	PMT2	YAL023C
YKL128C	PMU1	YKL128C
YEL055C	POL5	YEL055C
YNR052C	POP2	YNR052C
YHR026W	PPA1	YHR026W
YHR201C	PPX1	YHR201C
YLL036C	PRP19	YLL036C
YML046W	PRP39	YML046W
YGL120C	PRP43	YGL120C
YHL011C	PRS3	YHL011C
YBL068W	PRS4	YBL068W
YOL061W	PRS5	YOL061W
YOR361C	PRT1	YOR361C
YPL212C	PUS1	YPL212C
YEL037C	RAD23	YEL037C
YGL058W	RAD6	YGL058W
YNL290W	RFC3	YNL290W
YOL094C	RFC4	YOL094C
YBR087W	RFC5	YBR087W
YOL066C	RIB2	YOL066C
YDR257C	SET7	YDR257C
YPR065W	ROX1	YPR065W
YJR063W	RPA12	YJR063W
YDR156W	RPA14	YDR156W
YOR341W	RPA190	YOR341W
YJL148W	RPA34	YJL148W
YOR340C	RPA43	YOR340C
YOR210W	RPB10	YOR210W
YIL021W	RPB3	YIL021W
YOR224C	RPB8	YOR224C
YGL070C	RPB9	YGL070C
YNL113W	RPC19	YNL113W
YDL150W	RPC53	YDL150W
YPR102C	RPL11A	YPR102C
YEL054C	RPL12A	YEL054C
YPL220W	RPL1A	YPL220W
YMR242C	RPL20A	YMR242C
YOR063W	RPL3	YOR063W
YPL131W	RPL5	YPL131W
YHL033C	RPL8A	YHL033C
YGL147C	RPL9A	YGL147C
YHR062C	RPP1	YHR062C
YOL039W	RPP2A	YOL039W
YML063W	RPS1B	YML063W
YDR087C	RRP1	YDR087C
YHR069C	RRP4	YHR069C
YGR195W	SKI6	YGR195W
YDL111C	RRP42	YDL111C
YCR035C	RRP43	YCR035C
YCL031C	RRP7	YCL031C
YFR037C	RSC8	YFR037C
YGR152C	RSR1	YGR152C
YOR216C	RUD3	YOR216C
YKL212W	SAC1	YKL212W
YER043C	SAH1	YER043C
YDR502C	SAM2	YDR502C
YFR040W	SAP155	YFR040W
YJL098W	SAP185	YJL098W
YHR205W	SCH9	YHR205W
YMR214W	SCJ1	YMR214W
YOL020W	TAT2	YOL020W
YIL084C	SDS3	YIL084C
YPL094C	SEC62	YPL094C
YML105C	SEC65	YML105C
YDR170C	SEC7	YDR170C
YLR292C	SEC72	YLR292C
YPL083C	SEN54	YPL083C
YGR208W	SER2	YGR208W
YLR321C	SFH1	YLR321C
YLR403W	SFP1	YLR403W
YPR161C	SGV1	YPR161C
YPL026C	SKS1	YPL026C
YKL130C	SHE2	YKL130C
YBR130C	SHE3	YBR130C
YLR058C	SHM2	YLR058C
YER118C	SHO1	YER118C
YDL042C	SIR2	YDL042C
YKR072C	SIS2	YKR072C
YPR189W	SKI3	YPR189W
YBL061C	SKT5	YBL061C
YER029C	SMB1	YER029C
YNR015W	SMM1	YNR015W
YKL079W	SMY1	YKL079W
YBR172C	SMY2	YBR172C
YIL016W	SNL1	YIL016W
YMR016C	SOK2	YMR016C
YPR069C	SPE3	YPR069C
YEL031W	SPF1	YEL031W
YER148W	SPT15	YER148W
YIR012W	SQT1	YIR012W
YCL037C	SRO9	YCL037C
YKL122C	SRP21	YKL122C
YPL106C	SSE1	YPL106C
YHR066W	SSF1	YHR066W
YBR283C	SSH1	YBR283C
YHR084W	STE12	YHR084W
YDR410C	STE14	YDR410C
YOR212W	STE4	YOR212W
YIL126W	STH1	YIL126W
YGL169W	SUA5	YGL169W
YPR086W	SUA7	YPR086W
YJR007W	SUI2	YJR007W
YBR143C	SUP45	YBR143C
YDR297W	SUR2	YDR297W
YLR372W	SUR4	YLR372W
YMR236W	TAF9	YMR236W
YDR167W	TAF10	YDR167W
YGL112C	TAF6	YGL112C
YDR161W	non	YDR161W
YKL028W	TFA1	YKL028W
YNL039W	BDP1	YNL039W
YHR025W	THR1	YHR025W
YCR053W	THR4	YCR053W
YMR260C	TIF11	YMR260C
YJL138C	TIF2	YJL138C
YGL049C	TIF4632	YGL049C
YNR017W	MAS6	YNR017W
YOL115W	PAP2	YOL115W
YJL087C	TRL1	YJL087C
YDR120C	TRM1	YDR120C
YDR353W	TRR1	YDR353W
YMR039C	SUB1	YMR039C
YBR015C	MNN2	YBR015C
YBR166C	TYR1	YBR166C
YDR207C	UME6	YDR207C
YGR072W	UPF3	YGR072W
YKL216W	URA1	YKL216W
YJL130C	URA2	YJL130C
YML106W	URA5	YML106W
YKL024C	URA6	YKL024C
YNL229C	URE2	YNL229C
YEL040W	UTR2	YEL040W
YEL038W	UTR4	YEL038W
YML115C	VAN1	YML115C
YBR069C	TAT1	YBR069C
YGR094W	VAS1	YGR094W
YBR105C	VID24	YBR105C
YPR036W	VMA13	YPR036W
YBR127C	VMA2	YBR127C
YGR020C	VMA7	YGR020C
YOR270C	VPH1	YOR270C
YOR089C	VPS21	YOR089C
YML097C	VPS9	YML097C
YOL097C	WRS1	YOL097C
YAL019W	FUN30	YAL019W
YAL033W	POP5	YAL033W
YAL035W	FUN12	YAL035W
YAL036C	RBG1	YAL036C
YAR002W	NUP60	YAR002W
YPL239W	YAR1	YPL239W
YBL024W	NCL1	YBL024W
YBL036C	non	YBL036C
YBL055C	non	YBL055C
YBL104C	non	YBL104C
YBR002C	RER2	YBR002C
YBR025C	non	YBR025C
YBR028C	non	YBR028C
YBR061C	TRM7	YBR061C
YBR155W	CNS1	YBR155W
YBR227C	MCX1	YBR227C
YBR242W	non	YBR242W
YBR267W	REI1	YBR267W
YNL154C	YCK2	YNL154C
YCR027C	RHB1	YCR027C
YCR043C	non	YCR043C
YCR051W	non	YCR051W
YCR057C	PWP2	YCR057C
YCR060W	TAH1	YCR060W
YNL064C	YDJ1	YNL064C
YDL015C	TSC13	YDL015C
YDL060W	TSR1	YDL060W
YDL121C	non	YDL121C
YDL166C	FAP7	YDL166C
YDL201W	TRM8	YDL201W
YDL203C	ACK1	YDL203C
YDL213C	NOP6	YDL213C
YDL225W	SHS1	YDL225W
YDR033W	MRH1	YDR033W
YDR049W	non	YDR049W
YDR083W	RRP8	YDR083W
YDR101C	ARX1	YDR101C
YDR140W	MTQ2	YDR140W
YDR152W	GIR2	YDR152W
YDR153C	ENT5	YDR153C
YDR190C	RVB1	YDR190C
YDR233C	RTN1	YDR233C
YDR266C	non	YDR266C
YDR302W	GPI11	YDR302W
YDR352W	non	YDR352W
YDR361C	BCP1	YDR361C
YDR398W	UTP5	YDR398W
YDR400W	URH1	YDR400W
YDR449C	UTP6	YDR449C
YDR465C	RMT2	YDR465C
YDR482C	CWC21	YDR482C
YDR524C	AGE1	YDR524C
YDR527W	RBA50	YDR527W
YDR528W	HLR1	YDR528W
YLR249W	YEF3	YLR249W
YEL001C	IRC22	YEL001C
YEL015W	EDC3	YEL015W
YEL048C	non	YEL048C
YEL065W	SIT1	YEL065W
YER002W	NOP16	YER002W
YER006W	NUG1	YER006W
YER049W	TPA1	YER049W
YER072W	VTC1	YER072W
YER081W	SER3	YER081W
YER083C	GET2	YER083C
YER092W	IES5	YER092W
YER113C	non	YER113C
YER126C	NSA2	YER126C
YER128W	non	YER128W
YER156C	non	YER156C
YER174C	GRX4	YER174C
YFL023W	BUD27	YFL023W
YFL047W	RGD2	YFL047W
YFR001W	LOC1	YFR001W
YFR048W	RMD8	YFR048W
YGL067W	NPY1	YGL067W
YGL099W	LSG1	YGL099W
YGL111W	NSA1	YGL111W
YGL133W	ITC1	YGL133W
YGL174W	BUD13	YGL174W
YGL246C	RAI1	YGL246C
YGR081C	SLX9	YGR081C
YGR095C	RRP46	YGR095C
YGR103W	NOP7	YGR103W
YGR120C	COG2	YGR120C
YGR128C	UTP8	YGR128C
YGR173W	RBG2	YGR173W
YGR251W	non	YGR251W
YGR262C	BUD32	YGR262C
YGR234W	YHB1	YGR234W
YHL013C	OTU2	YHL013C
YMR241W	YHM2	YMR241W
YHR003C	non	YHR003C
YHR046C	INM1	YHR046C
YHR049W	FSH1	YHR049W
YHR063C	PAN5	YHR063C
YHR085W	IPI1	YHR085W
YHR133C	NSG1	YHR133C
YHR149C	SKG6	YHR149C
YHR196W	UTP9	YHR196W
YHR197W	RIX1	YHR197W
YIL005W	EPS1	YIL005W
YIL039W	non	YIL039W
YIL074C	SER33	YIL074C
YIL091C	non	YIL091C
YIL104C	SHQ1	YIL104C
YIL145C	PAN6	YIL145C
YIL161W	non	YIL161W
YJL010C	NOP9	YJL010C
YJL109C	UTP10	YJL109C
YJL122W	ALB1	YJL122W
YJL145W	SFH5	YJL145W
YJL171C	non	YJL171C
YJL186W	MNN5	YJL186W
YJL192C	SOP4	YJL192C
YJL212C	OPT1	YJL212C
YJR003C	non	YJR003C
YJR014W	TMA22	YJR014W
YJR015W	non	YJR015W
YJR070C	LIA1	YJR070C
YJR072C	NPA3	YJR072C
YJR097W	JJJ3	YJR097W
YKL008C	LAC1	YKL008C
YKL029C	MAE1	YKL029C
YKL046C	DCW1	YKL046C
YKL059C	MPE1	YKL059C
YKL077W	non	YKL077W
YKL120W	OAC1	YKL120W
YKL183W	LOT5	YKL183W
YKR023W	non	YKR023W
YKR038C	KAE1	YKR038C
YKR043C	non	YKR043C
YKR045C	non	YKR045C
YKR060W	UTP30	YKR060W
YKR071C	DRE2	YKR071C
YKR079C	TRZ1	YKR079C
YKR090W	PXL1	YKR090W
YLL027W	ISA1	YLL027W
YLL038C	ENT4	YLL038C
YLR002C	NOC3	YLR002C
YLR022C	SDO1	YLR022C
YLR073C	non	YLR073C
YLR074C	BUD20	YLR074C
YLR221C	RSA3	YLR221C
YLR222C	UTP13	YLR222C
YLR380W	CSR1	YLR380W
YLR405W	DUS4	YLR405W
YLR413W	non	YLR413W
YLR432W	IMD3	YLR432W
YLR435W	TSR2	YLR435W
YML005W	TRM12	YML005W
YML014W	TRM9	YML014W
YML018C	non	YML018C
YML071C	COG8	YML071C
YML080W	DUS1	YML080W
YML082W	non	YML082W
YML093W	UTP14	YML093W
YML096W	non	YML096W
YMR010W	non	YMR010W
YMR093W	UTP15	YMR093W
YMR153W	NUP53	YMR153W
YMR212C	EFR3	YMR212C
YMR259C	non	YMR259C
YMR266W	RSN1	YMR266W
YMR309C	NIP1	YMR309C
YNL010W	non	YNL010W
YNL065W	AQR1	YNL065W
YNL087W	TCB2	YNL087W
YNL119W	NCS2	YNL119W
YNL123W	NMA111	YNL123W
YNL163C	RIA1	YNL163C
YNL166C	BNI5	YNL166C
YNL175C	NOP13	YNL175C
YNL181W	non	YNL181W
YNL191W	DUG3	YNL191W
YNL201C	PSY2	YNL201C
YNL207W	RIO2	YNL207W
YNL231C	PDR16	YNL231C
YNL232W	CSL4	YNL232W
YNL245C	CWC25	YNL245C
YNL255C	GIS2	YNL255C
YNL264C	PDR17	YNL264C
YNL308C	KRI1	YNL308C
YNL313C	non	YNL313C
YNL326C	PFA3	YNL326C
YNR014W	non	YNR014W
YNR024W	non	YNR024W
YNR027W	BUD17	YNR027W
YNR029C	non	YNR029C
YNR048W	non	YNR048W
YNR051C	BRE5	YNR051C
YLR059C	REX2	YLR059C
YOL022C	non	YOL022C
YOL031C	SIL1	YOL031C
YOL041C	NOP12	YOL041C
YOL077C	BRX1	YOL077C
YOL080C	REX4	YOL080C
YOL092W	non	YOL092W
YOL093W	TRM10	YOL093W
YOL124C	TRM11	YOL124C
YOL142W	RRP40	YOL142W
YOL144W	NOP8	YOL144W
YOR004W	UTP23	YOR004W
YOR051C	non	YOR051C
YOR056C	NOB1	YOR056C
YOR104W	PIN2	YOR104W
YOR112W	non	YOR112W
YOR179C	SYC1	YOR179C
YOR206W	NOC2	YOR206W
YOR226C	ISU2	YOR226C
YOR239W	ABP140	YOR239W
YOR241W	MET7	YOR241W
YOR252W	TMA16	YOR252W
YOR253W	NAT5	YOR253W
YOR262W	non	YOR262W
YOR271C	FSF1	YOR271C
YOR281C	PLP2	YOR281C
YOR283W	non	YOR283W
YOR311C	HSD1	YOR311C
YOR342C	non	YOR342C
YOR359W	VTS1	YOR359W
YDL235C	YPD1	YDL235C
YPL047W	SGF11	YPL047W
YPL093W	NOG1	YPL093W
YPL105C	non	YPL105C
YPL126W	NAN1	YPL126W
YPL137C	GIP3	YPL137C
YPL146C	NOP53	YPL146C
YPL181W	CTI6	YPL181W
YPL183C	non	YPL183C
YPL207W	TYW1	YPL207W
YPL221W	FLC1	YPL221W
YPL246C	RBD2	YPL246C
YPL252C	YAH1	YPL252C
YPR114W	non	YPR114W
YPR118W	non	YPR118W
YPR125W	YLH47	YPR125W
YPR137W	RRP9	YPR137W
YPR143W	RRP15	YPR143W
YPR169W	JIP5	YPR169W
YDR349C	YPS7	YDR349C
YIR026C	YVH1	YIR026C
YMR243C	ZRC1	YMR243C
YGR285C	ZUO1	YGR285C
GO Enrichments
Process
GOID	GO_term	Cluster frequency	Background frequency	P-value	Gene(s) annotated to the term	Directly Annotated GOID List
22613	ribonucleoprotein complex biogenesis and assembly	130 out of 582 genes, 22.3%	400 out of 7288 background genes, 5.5%	2.83e-46	POP5:FUN12:RBG1:ECM1:NCL1:PRS4:HMT1:ENP1:REI1:RRP7:SRO9:RRP43:PWP2:TSR1:RRP42:FAP7:NRP1:TRM8:NHP2:NOP6:RRP8:RRP1:ARX1:TRM1:YDR161W:BCP1:CDC40:UTP5:UTP6:RMT2:RPL12A:NOP16:NUG1:TPA1:NSA2:PAB1:BRR2:LOC1:TIF4632:DBP3:LSG1:NSA1:PRP43:NUP49:RAI1:SLX9:RRP46:NOP7:UTP8:MTR3:NSR1:HGH1:SKI6:YGR251W:PRS3:RPP1:SSF1:RRP4:IPI1:DBP8:NMD3:UTP9:RIX1:SQT1:YVH1:NOP9:UTP10:ALB1:GCD14:TIF2:RPA34:YJR003C:SUI2:RPA12:LIA…	391:288:74:395:8298:396:30468:6400:6402:105:43248:6406:6407:6408:6409:7067:6446:46515:184:6379:6913:30437:723:16070:5977:42273:18216:42274:6412:6413:6414:6270:6166:226:6999:6451:154:1403:6383:6388:910:54:55:43330:30488:6207:30489:30846:7117:7047:7049:6281:162:6606:18195:6607:6608:6609:6464:348:27:28:8283:278:30490:6970:389:42254:42255:747:7124:6146:17183:8033:7126:6979:6610:6611:6360:7059:6364:31…
42254	ribosome biogenesis and assembly	117 out of 582 genes, 20.1%	330 out of 7288 background genes, 4.5%	1.37e-45	POP5:RBG1:ECM1:NCL1:PRS4:HMT1:ENP1:REI1:RRP7:SRO9:RRP43:PWP2:TSR1:RRP42:FAP7:NRP1:TRM8:NHP2:NOP6:RRP8:RRP1:ARX1:TRM1:YDR161W:BCP1:UTP5:UTP6:RMT2:RPL12A:NOP16:NUG1:TPA1:NSA2:LOC1:DBP3:LSG1:NSA1:PRP43:NUP49:RAI1:SLX9:RRP46:NOP7:UTP8:MTR3:NSR1:HGH1:SKI6:YGR251W:PRS3:RPP1:SSF1:RRP4:IPI1:DBP8:NMD3:UTP9:RIX1:SQT1:YVH1:NOP9:UTP10:ALB1:GCD14:RPA34:YJR003C:RPA12:LIA1:MRT4:MAK11:DPH2:UTP30:NOC3:SDO1:BUD20:…	391:288:8298:30468:6400:6402:105:43248:6406:6407:6408:6409:7067:46515:6913:6379:30437:723:16070:5977:18216:42273:42274:6412:6413:6414:6270:6166:226:6999:6451:154:1403:6383:6388:54:910:55:43330:6207:30488:30489:30846:7117:7047:7049:6281:162:6606:6607:18195:6608:6609:6464:27:8283:28:278:30490:6970:42254:42255:747:7124:6146:17183:7126:8033:6979:6610:6360:6611:7059:31118:6364:6365:280:6189:282:8361
16043	cellular component organization and biogenesis	305 out of 582 genes, 52.4%	2183 out of 7288 background genes, 30.0%	2.81e-29	FUN30:POP5:FUN12:RBG1:CYC3:GCV3:ECM1:NUP60:MCM2:NCL1:YBL055C:SKT5:PRS4:AST1:RER2:KAP104:HMT1:RFC5:PHO88:GRS1:VMA2:SHE3:SUP45:SMY2:ENP1:REI1:PAF1:SSH1:APM3:GBP2:RRP7:SRO9:RHB1:RRP43:THR4:PWP2:NHP10:SIR2:TSR1:ASM4:RRP42:NUP84:COP1:FAP7:NRP1:TRM8:NHP2:NOP6:SHS1:PHO13:RRP8:RRP1:ARX1:TRM1:ENT5:RPA14:YDR161W:TAF10:SEC7:RVB1:UME6:MNN10:BCP1:CDC40:UTP5:NPL3:UTP6:RMT2:KRE2:AGE1:HLR1:RAD23:UTR2:RPL12A:NOP1…	715:8298:6400:7131:6402:6403:6404:6405:9749:6333:7062:6406:6334:6407:7064:6408:6409:7067:6265:31124:6338:147:7068:6267:6268:31055:1324:15883:6913:6842:723:42994:5977:6412:6413:6414:6342:6415:6270:2:226:6418:6272:48017:42493:154:7076:6348:1403:32447:46856:16192:30846:30847:301:45047:6353:6426:6354:6281:162:6355:6356:6357:6359:6289:42144:742:42147:747:6797:8033:7232:6360:6364:6365:6366:7096:8610:63…
9987	cellular process	492 out of 582 genes, 84.5%	4701 out of 7288 background genes, 64.5%	3.99e-26	CYS3:FUN30:PMT2:POP5:FUN12:RBG1:CYC3:GCV3:ECM1:NUP60:ADE1:MCM2:NCL1:YBL036C:YBL055C:SKT5:PRS4:AST1:ILS1:MAP2:RER2:MNN2:KAP104:HMT1:TRM7:RFC5:VID24:PHO88:GRS1:VMA2:SHE3:SUP45:CNS1:TYR1:SMY2:ABD1:ENP1:HIS7:ARO4:DUT1:REI1:PAF1:SSH1:APM3:GBP2:HIS4:RRP7:SRO9:APA1:RHB1:FEN1:RRP43:THR4:PWP2:TAH1:NHP10:TSC13:SIR2:LHP1:TSR1:ASM4:RRP42:NUP84:COP1:RPC53:FAP7:NRP1:DLD2:TRM8:NHP2:NOP6:SHS1:YPD1:PHO13:LCB2:RRP…	715:8295:7568:8298:6696:6400:7131:6402:6403:6404:6405:9749:6333:7062:6406:6334:6407:7064:6408:6409:7067:6265:31124:6338:147:7068:6267:6268:31055:1324:15883:6913:6915:6842:723:42994:5975:5977:16255:16259:6412:6413:6414:6342:6415:6270:2:226:6418:6272:48017:154:42493:7076:18364:6348:1403:15892:6784:6857:32447:46855:46856:16192:30846:30847:301:45047:6350:6353:6426:6427:6354:6281:162:6355:6356:6357:63…
6996	organelle organization and biogenesis	208 out of 582 genes, 35.7%	1293 out of 7288 background genes, 17.7%	1.24e-24	FUN30:POP5:RBG1:GCV3:ECM1:NUP60:NCL1:YBL055C:PRS4:HMT1:RFC5:PHO88:VMA2:SHE3:SMY2:ENP1:REI1:PAF1:SSH1:GBP2:RRP7:SRO9:RRP43:PWP2:NHP10:SIR2:TSR1:ASM4:RRP42:NUP84:FAP7:NRP1:TRM8:NHP2:NOP6:PHO13:RRP8:RRP1:ARX1:TRM1:RPA14:YDR161W:TAF10:RVB1:UME6:MNN10:BCP1:UTP5:UTP6:RMT2:RAD23:RPL12A:NOP16:NUG1:TPA1:VTC1:GLO3:NSA2:PEA2:LOC1:NIC96:RSC8:RAD6:RPB9:DBP3:NUP145:LSG1:NSA1:TAF6:PRP43:ITC1:NUP49:RAI1:VMA7:CAX…	715:8298:6400:7131:6402:6405:6333:7062:6406:6334:6407:7064:6408:6409:7067:6265:31124:6338:147:7068:31055:6913:6842:723:42994:5977:6412:6413:6414:6342:6270:2:226:6272:42493:154:7076:6348:1403:32447:30846:6354:6281:162:6355:6357:6289:42144:742:747:6797:8033:6360:6364:6365:6366:8610:6367:6368:6298:6874:6511:6513:46515:183:184:30433:6379:30437:10044:6888:6451:6383:6457:51204:6388:910:30447:43044:4602…
6364	rRNA processing	63 out of 582 genes, 10.8%	176 out of 7288 background genes, 2.4%	2.93e-23	POP5:ENP1:RRP7:RRP43:PWP2:TSR1:RRP42:FAP7:NHP2:NOP6:RRP8:RRP1:UTP5:UTP6:NUG1:NSA2:DBP3:PRP43:RAI1:SLX9:RRP46:NOP7:UTP8:MTR3:NSR1:SKI6:YGR251W:RPP1:RRP4:IPI1:DBP8:UTP9:RIX1:NOP9:UTP10:MRT4:MAK11:UTP30:NOC3:SDO1:SIK1:UTP13:TSR2:UTP14:UTP15:NOP2:RIA1:RIO2:CSL4:DBP6:REX4:RRP40:NOP8:UTP23:NOB1:NOP58:NOP4:NOG1:NAN1:NOP53:NIP7:RRP9:RRP15	6402:723:6270:154:30846:8033:6364:6365:6379:910:27:28:42254:42255:6979:30468:42273:42274:54:55:30489:30490:391:43248:16070:43330:7049:8283:31118
16070	RNA metabolic process	168 out of 582 genes, 28.9%	1022 out of 7288 background genes, 14.0%	1.31e-19	POP5:NCL1:TRM7:GRS1:ABD1:ENP1:PAF1:RRP7:RRP43:PWP2:SIR2:LHP1:TSR1:RRP42:RPC53:FAP7:TRM8:NHP2:NOP6:RRP8:RRP1:TRM1:RPA14:TAF10:RVB1:UME6:CDC40:UTP5:UTP6:RBA50:EDC3:POL5:NUG1:SMB1:TPA1:NSA2:SPT15:CCA1:BRR2:DEG1:CKB1:RPB9:DBP3:NUP145:ARC1:TAF6:PRP43:NAB2:ITC1:NUP49:BUD13:RAI1:UPF3:SLX9:VAS1:RRP46:NOP7:UTP8:MTR3:NSR1:SKI6:YGR251W:BUD32:MES1:MED6:RPP1:RRP4:STE12:IPI1:DBP8:UTP9:RIX1:RPB3:CKA1:NOT3:SDS3:…	6400:7131:6402:9749:6406:6333:6334:6407:7064:6408:6409:6265:31124:6338:7068:723:6412:6413:6342:6270:6418:42493:154:7076:6348:1403:30846:30847:6353:6426:6427:6281:6354:6355:6356:6357:6359:6289:747:8033:6431:6360:6436:6364:6438:6365:6366:6367:6368:6369:31087:6873:6511:6370:183:184:6378:6379:30437:6950:6451:7329:6383:6384:6388:910:46020:6606:43629:6607:6608:6609:43488:19358:348:27:6468:6396:28:42254…
8152	metabolic process	391 out of 582 genes, 67.2%	3509 out of 7288 background genes, 48.1%	3.74e-19	CYS3:PMT2:POP5:FUN12:CYC3:GCV3:NUP60:ADE1:MCM2:NCL1:YBL036C:YBL055C:SKT5:PRS4:ILS1:MAP2:RER2:MNN2:HMT1:TRM7:RFC5:VID24:GRS1:SHE3:SUP45:CNS1:TYR1:ABD1:ENP1:HIS7:ARO4:DUT1:PAF1:HIS4:RRP7:SRO9:APA1:FEN1:RRP43:THR4:PWP2:TAH1:NHP10:TSC13:SIR2:LHP1:TSR1:ASM4:RRP42:NUP84:RPC53:FAP7:DLD2:TRM8:NHP2:NOP6:PHO13:LCB2:RRP8:RRP1:TRM1:MTQ2:RPA14:HOM2:TAF10:RVB1:UME6:MNN10:SUR2:GPI11:GPI8:TRR1:CDC40:UTP5:HPT1:UR…	715:8295:7568:8298:6696:6400:7131:6402:9749:6333:7062:6406:6334:6407:7064:6408:6409:7067:6265:31124:6338:7068:6267:6268:31055:1324:15883:6913:6915:723:42994:5975:5977:16255:16259:6412:6413:6414:6342:6415:6270:226:6418:6272:48017:154:42493:7076:18364:6348:1403:6784:6857:32447:46855:46856:16192:30846:30847:45047:6350:6353:6426:6427:6354:6281:162:6355:6356:6357:6359:6289:42144:6790:747:17148:6797:80…
6139	nucleobase, nucleoside, nucleotide and nucleic acid metabolic process	217 out of 582 genes, 37.3%	1510 out of 7288 background genes, 20.7%	4.94e-19	POP5:ADE1:MCM2:NCL1:YBL055C:PRS4:TRM7:RFC5:GRS1:SHE3:ABD1:ENP1:HIS7:DUT1:PAF1:RRP7:APA1:RRP43:PWP2:NHP10:SIR2:LHP1:TSR1:RRP42:NUP84:RPC53:FAP7:TRM8:NHP2:NOP6:PHO13:RRP8:RRP1:TRM1:RPA14:TAF10:RVB1:UME6:CDC40:UTP5:HPT1:URH1:ADE8:UTP6:GUK1:RBA50:EDC3:RAD23:POL5:NUG1:SMB1:TPA1:NSA2:SPT15:CCA1:BRR2:DEG1:RSC8:CKB1:RAD6:NPY1:RPB9:DBP3:NUP145:ARC1:TAF6:PRP43:NAB2:ITC1:NUP49:BUD13:ADE5,7:RAI1:UPF3:SLX9:VA…	715:8298:6400:7131:6402:9749:6406:6333:7062:6334:6407:7064:6408:6409:7067:6265:31124:6338:7068:6267:6268:31055:723:6412:6413:6342:6270:6418:6272:154:42493:7076:6348:1403:30846:30847:6350:6353:6426:6427:6354:6281:162:6355:6356:6357:6359:6289:747:8033:6431:6360:6436:6364:6438:6365:6366:6367:6368:6369:6298:31087:6873:6511:6513:6370:183:184:30433:6378:6379:30437:6950:6451:7329:6383:6384:6388:910:4304…
6396	RNA processing	87 out of 582 genes, 14.9%	368 out of 7288 background genes, 5.0%	1.32e-18	POP5:ABD1:ENP1:RRP7:RRP43:PWP2:LHP1:TSR1:RRP42:FAP7:NHP2:NOP6:RRP8:RRP1:CDC40:UTP5:UTP6:NUG1:SMB1:NSA2:BRR2:DEG1:DBP3:NUP145:PRP43:NAB2:NUP49:BUD13:RAI1:SLX9:RRP46:NOP7:UTP8:MTR3:NSR1:SKI6:YGR251W:RPP1:RRP4:IPI1:DBP8:UTP9:RIX1:NOT3:NOP9:TRL1:UTP10:MRT4:MAK11:MPE1:CTK1:LOS1:UTP30:TRZ1:PRP19:NOC3:SDO1:REX2:SIK1:UTP13:TSR2:PRP39:UTP14:UTP15:NOP2:RIA1:RIO2:CSL4:CWC25:SMM1:DBP6:POP2:REX4:PAP2:RRP40:NO…	6400:6402:6406:6407:7064:6408:6409:6265:31124:723:6270:154:7076:30846:6357:8033:6364:6365:6368:6511:6370:6378:6379:6388:910:6606:43629:6607:6608:6609:348:6468:27:6396:28:42254:42255:43630:6979:6610:6611:43634:30969:282:289:30468:42779:16973:42273:42274:50000:6999:54:55:30489:30490:389:16567:391:395:396:398:43248:16070:16075:16076:16077:16078:43330:7049:8283:31118:32786
44237	cellular metabolic process	383 out of 582 genes, 65.8%	3429 out of 7288 background genes, 47.0%	1.7e-18	CYS3:PMT2:POP5:FUN12:CYC3:GCV3:NUP60:ADE1:MCM2:NCL1:YBL036C:YBL055C:SKT5:PRS4:ILS1:MAP2:RER2:MNN2:HMT1:TRM7:RFC5:VID24:GRS1:SHE3:SUP45:CNS1:TYR1:ABD1:ENP1:HIS7:ARO4:DUT1:PAF1:HIS4:RRP7:SRO9:APA1:FEN1:RRP43:THR4:PWP2:TAH1:NHP10:TSC13:SIR2:LHP1:TSR1:ASM4:RRP42:NUP84:RPC53:FAP7:DLD2:TRM8:NHP2:NOP6:PHO13:LCB2:RRP8:RRP1:TRM1:MTQ2:RPA14:HOM2:TAF10:RVB1:UME6:MNN10:SUR2:GPI11:GPI8:TRR1:CDC40:UTP5:HPT1:UR…	715:8295:7568:8298:6696:6400:7131:6402:9749:6333:7062:6406:6334:6407:7064:6408:6409:7067:6265:31124:6338:7068:6267:6268:31055:1324:15883:6913:723:42994:5975:5977:16255:16259:6412:6413:6414:6342:6415:6270:226:6418:6272:48017:154:42493:7076:18364:6348:1403:6784:6857:32447:46855:46856:16192:30846:30847:45047:6350:6353:6426:6427:6354:6281:162:6355:6356:6357:6359:6289:42144:6790:747:17148:6797:8033:64…
44238	primary metabolic process	363 out of 582 genes, 62.4%	3207 out of 7288 background genes, 44.0%	1.27e-17	CYS3:PMT2:POP5:FUN12:CYC3:GCV3:NUP60:ADE1:MCM2:NCL1:YBL036C:YBL055C:SKT5:PRS4:ILS1:MAP2:RER2:MNN2:HMT1:TRM7:RFC5:VID24:GRS1:SHE3:SUP45:CNS1:TYR1:ABD1:ENP1:HIS7:ARO4:DUT1:PAF1:HIS4:RRP7:SRO9:APA1:FEN1:RRP43:THR4:PWP2:TAH1:NHP10:TSC13:SIR2:LHP1:TSR1:ASM4:RRP42:NUP84:RPC53:FAP7:TRM8:NHP2:NOP6:PHO13:LCB2:RRP8:RRP1:TRM1:MTQ2:RPA14:HOM2:TAF10:RVB1:UME6:MNN10:SUR2:GPI11:GPI8:CDC40:UTP5:HPT1:URH1:ADE8:ST…	715:8295:7568:8298:6696:6400:7131:6402:9749:6333:7062:6406:6334:6407:7064:6408:6409:7067:6265:31124:6338:7068:6267:6268:31055:1324:15883:6913:6915:723:42994:5975:5977:16255:16259:6412:6413:6414:6342:6415:6270:226:6418:6272:48017:154:42493:7076:18364:6348:1403:32447:46855:46856:16192:30846:30847:45047:6350:6353:6426:6427:6354:6281:162:6355:6356:6357:6359:6289:42144:747:17148:6797:8033:6431:6506:63…
16072	rRNA metabolic process	65 out of 582 genes, 11.2%	257 out of 7288 background genes, 3.5%	7.29e-15	POP5:ENP1:RRP7:RRP43:PWP2:TSR1:RRP42:FAP7:NHP2:NOP6:RRP8:RRP1:UTP5:UTP6:NUG1:NSA2:DBP3:PRP43:RAI1:SLX9:RRP46:NOP7:UTP8:MTR3:NSR1:SKI6:YGR251W:RPP1:RRP4:IPI1:DBP8:UTP9:RIX1:NOP9:UTP10:MRT4:MAK11:UTP30:NOC3:SDO1:SIK1:UTP13:TSR2:UTP14:UTP15:NOP2:RIA1:RIO2:CSL4:DBP6:NOP12:REX4:PAP2:RRP40:NOP8:UTP23:NOB1:NOP58:NOP4:NOG1:NAN1:NOP53:NIP7:RRP9:RRP15	6402:7064:6265:723:6270:154:7076:30846:8033:6364:6365:6379:910:43629:27:28:42254:42255:43630:6979:43634:30468:42273:42274:54:55:30489:30490:391:43248:16070:16072:16075:16076:16077:16078:43330:7049:8283:31118
51169	nuclear transport	39 out of 582 genes, 6.7%	115 out of 7288 background genes, 1.6%	1.07e-12	ECM1:NUP60:KAP104:HMT1:GBP2:ASM4:NUP84:BCP1:NPL3:KAP123:NIC96:NUP145:LSG1:ARC1:NAB2:NUP49:BUD13:CSE1:NMD3:RIX1:NUP82:NUP85:NMD5:NUP100:LOS1:NUP133:NUP2:MFT1:NUP188:NUP53:PSE1:HRB1:URE2:NUP1:CEX1:MTR10:NOC2:NOG1:NOP53	6403:6404:6405:6406:6407:6408:6409:6913:723:42994:6342:6418:6348:32447:747:6365:6368:6378:30437:10044:6388:6606:6607:6608:6609:27:42254:42255:6974:6610:6611:282:16973:42273:50000:6998:6999:54:55:59:30489:398:6808:6310:7047:7049:18195:7124:6259
6913	nucleocytoplasmic transport	40 out of 582 genes, 6.9%	122 out of 7288 background genes, 1.7%	1.7e-12	ECM1:NUP60:KAP104:HMT1:REI1:GBP2:ASM4:NUP84:BCP1:NPL3:KAP123:NIC96:NUP145:LSG1:ARC1:NAB2:NUP49:BUD13:CSE1:NMD3:RIX1:NUP82:NUP85:NMD5:NUP100:LOS1:NUP133:NUP2:MFT1:NUP188:NUP53:PSE1:HRB1:URE2:NUP1:CEX1:MTR10:NOC2:NOG1:NOP53	6403:6404:6405:6406:6407:6408:6409:6913:723:42994:6342:6418:6348:32447:747:6365:6368:6378:30437:10044:6388:6606:6607:6608:6609:27:278:42254:42255:6974:6610:6611:282:16973:42273:50000:6998:6999:54:55:59:30489:398:6808:6310:7117:7047:7049:18195:7124:6259
42273	ribosomal large subunit biogenesis and assembly	28 out of 582 genes, 4.8%	63 out of 7288 background genes, 0.9%	4.22e-12	REI1:ARX1:RPL12A:NOP16:NSA2:LOC1:DBP3:NSA1:PRP43:NOP7:SSF1:IPI1:NMD3:RIX1:SQT1:ALB1:MRT4:MAK11:RSA3:RIA1:DBP6:BRX1:NOP8:RPL3:NOG1:RPL5:NIP7:RPL11A	8298:6402:6913:723:6412:747:6364:6365:27:278:42254:42273:54:55:30489:30490:391:7117:7049:8283:8361
51168	nuclear export	33 out of 582 genes, 5.7%	97 out of 7288 background genes, 1.3%	1.63e-10	ECM1:HMT1:GBP2:ASM4:NUP84:BCP1:NPL3:NIC96:NUP145:LSG1:ARC1:NAB2:NUP49:BUD13:CSE1:NMD3:RIX1:NUP82:NUP85:NUP100:LOS1:NUP133:NUP2:MFT1:NUP188:NUP53:PSE1:HRB1:NUP1:CEX1:NOC2:NOG1:NOP53	6405:6406:6407:6408:6409:723:6342:6418:6348:747:6365:6368:6378:30437:6388:6606:6607:6608:6609:27:42254:42255:6974:6610:6611:282:16973:42273:50000:6998:6999:54:55:59:30489:398:6310:7047:18195:7124:6259
6611	protein export from nucleus	22 out of 582 genes, 3.8%	51 out of 7288 background genes, 0.7%	8.12e-09	ECM1:ASM4:NUP84:BCP1:NIC96:NUP145:LSG1:NUP49:CSE1:NMD3:RIX1:NUP82:NUP85:NUP100:NUP133:NUP2:NUP188:NUP53:NUP1:NOC2:NOG1:NOP53	6405:6406:6407:6408:6409:6342:6348:747:6365:30437:6388:6606:6607:6608:6609:27:42254:42255:6974:6610:6611:42273:50000:6998:6999:54:55:59:30489:7047:6259
30490	processing of 20S pre-rRNA	20 out of 582 genes, 3.4%	44 out of 7288 background genes, 0.6%	2.25e-08	PWP2:FAP7:UTP5:UTP6:PRP43:NOP7:UTP8:UTP9:UTP10:SIK1:UTP13:TSR2:UTP14:UTP15:RIO2:UTP23:NOB1:NOP58:NAN1:RRP9	154:6364:6365:910:42254:6979:30468:42273:42274:30489:30490:391:43248:7049:8283
6519	amino acid and derivative metabolic process	46 out of 582 genes, 7.9%	200 out of 7288 background genes, 2.7%	2.31e-08	CYS3:GCV3:YBL036C:PRS4:GRS1:TYR1:HIS7:ARO4:HIS4:THR4:HOM2:SAM2:SAH1:HOM3:SER3:ILV1:MET6:ARC1:MUQ1:VAS1:SER2:MES1:PRS3:THR1:DYS1:HIS6:SER33:LYS12:MET18:LYS1:URA2:MET3:ILV3:LIA1:ECM17:MAE1:GCV2:LYS9:PRS5:MET22:WRS1:GDH1:HTS1:ARO7:SPE3:YPR118W	8295:6409:723:16259:226:6418:42493:6353:6426:6427:162:6289:6431:6436:6438:6366:8612:46515:6520:19346:19856:6897:6534:6537:42254:6541:19509:6546:6549:8652:19878:6555:6566:6207:6570:6646:9127:103:105:6730:6090:6166:9070:9073:96:42538:7047:9082:9085:9086:15940:6189:8361:9090:9092
6399	tRNA metabolic process	33 out of 582 genes, 5.7%	115 out of 7288 background genes, 1.6%	3.34e-08	POP5:NCL1:TRM7:GRS1:LHP1:TRM8:TRM1:CCA1:NUP145:ARC1:NUP49:VAS1:MES1:RPP1:TRL1:GCD14:KTI12:LOS1:TRZ1:DUS4:TRM12:TRM9:DUS1:SMM1:RIB2:TRM10:WRS1:PAP2:TRM11:MOD5:SEN54:PUS1:HTS1	6400:6406:6407:7064:6408:6409:6265:6412:6418:7076:6353:6426:6427:6357:8033:6431:6436:6364:6438:6379:6950:6388:6606:43629:6607:6608:6609:42254:43630:6610:6611:43634:30969:42779:50000:6999:55:16049:30488:16075:16076:16077:16078:9231:31119
6609	mRNA-binding (hnRNP) protein import into nucleus	15 out of 582 genes, 2.6%	25 out of 7288 background genes, 0.3%	4.33e-08	KAP104:ASM4:NUP84:NIC96:NUP145:NUP49:NUP82:NUP85:NUP100:NUP133:NUP2:NUP188:NUP53:NUP1:MTR10	6403:6404:6405:6406:6407:6408:6409:6342:6348:6388:6606:6607:6608:6609:6974:6610:6611:50000:6998:6999:55:59:7049:6259
6403	RNA localization	28 out of 582 genes, 4.8%	88 out of 7288 background genes, 1.2%	7.23e-08	HMT1:SHE3:GBP2:ASM4:NUP84:NPL3:LOC1:NIC96:NUP145:ARC1:NAB2:NUP49:BUD13:NUP82:NUP85:NUP100:SHE2:LOS1:NUP133:NUP2:MFT1:NUP188:NUP53:PSE1:HRB1:NUP1:CEX1:MTR10	8298:6403:6404:6405:6406:6407:6408:6409:723:6342:6418:6348:6368:6378:6388:6606:6607:6608:6609:42254:6974:6610:6611:282:16973:42273:50000:6998:6999:48309:55:59:398:7534:6310:18195:7124:6259
51170	nuclear import	20 out of 582 genes, 3.4%	48 out of 7288 background genes, 0.7%	1.58e-07	NUP60:KAP104:ASM4:NUP84:KAP123:NIC96:NUP145:NUP49:NUP82:NUP85:NMD5:NUP100:NUP133:NUP2:NUP188:NUP53:PSE1:URE2:NUP1:MTR10	6403:6404:6405:6406:6407:6408:6409:6913:723:42994:6342:6348:32447:10044:6388:6606:6607:6608:6609:6974:6610:6611:50000:6998:6999:55:59:6808:7049:6259
6606	protein import into nucleus	20 out of 582 genes, 3.4%	48 out of 7288 background genes, 0.7%	1.58e-07	NUP60:KAP104:ASM4:NUP84:KAP123:NIC96:NUP145:NUP49:NUP82:NUP85:NMD5:NUP100:NUP133:NUP2:NUP188:NUP53:PSE1:URE2:NUP1:MTR10	6403:6404:6405:6406:6407:6408:6409:6913:723:42994:6342:6348:32447:10044:6388:6606:6607:6608:6609:6974:6610:6611:50000:6998:6999:55:59:6808:7049:6259
43170	macromolecule metabolic process	295 out of 582 genes, 50.7%	2801 out of 7288 background genes, 38.4%	2.55e-07	PMT2:POP5:FUN12:CYC3:NUP60:MCM2:NCL1:YBL055C:SKT5:ILS1:MAP2:RER2:MNN2:HMT1:TRM7:RFC5:VID24:GRS1:SHE3:SUP45:CNS1:ABD1:ENP1:PAF1:RRP7:SRO9:RRP43:PWP2:TAH1:NHP10:SIR2:LHP1:TSR1:ASM4:RRP42:NUP84:RPC53:FAP7:TRM8:NHP2:NOP6:PHO13:RRP8:RRP1:TRM1:MTQ2:RPA14:TAF10:RVB1:UME6:MNN10:GPI11:GPI8:CDC40:UTP5:URH1:STE14:UTP6:RMT2:KRE2:RBA50:GIM4:EDC3:SPF1:ANP1:RAD23:GDA1:RPL12A:POL5:PCM1:NUG1:SMB1:TPA1:HOR2:NSA2:S…	715:8298:6400:7131:6402:9749:6333:7062:6406:6334:6407:7064:6408:6409:7067:6265:31124:6338:7068:6267:6268:31055:1324:15883:6913:723:42994:5975:5977:16255:6412:6413:6414:6342:6415:6270:6418:6272:48017:42493:154:7076:18364:6348:1403:32447:46855:46856:16192:30846:30847:45047:6350:6353:6426:6427:6354:6281:6355:6356:6357:6359:6289:42144:747:17148:6797:8033:6431:6506:6360:6508:6436:6364:6438:6365:6366:8…
6520	amino acid metabolic process	42 out of 582 genes, 7.2%	185 out of 7288 background genes, 2.5%	2.75e-07	CYS3:GCV3:YBL036C:PRS4:GRS1:TYR1:HIS7:ARO4:HIS4:THR4:HOM2:SAM2:SAH1:HOM3:SER3:ILV1:MET6:ARC1:VAS1:SER2:MES1:PRS3:THR1:HIS6:SER33:LYS12:MET18:LYS1:URA2:MET3:ILV3:ECM17:MAE1:GCV2:LYS9:PRS5:MET22:WRS1:GDH1:HTS1:ARO7:YPR118W	6409:723:16259:6418:42493:6353:6426:6427:162:6289:6431:6436:6438:6366:6520:19346:19856:6897:6534:6537:42254:6541:19509:6546:6549:8652:19878:6555:6566:6207:6570:9127:103:105:6730:6090:6166:9070:9073:96:42538:7047:9082:9085:9086:6189:8361:9090:9092
6365	35S primary transcript processing	26 out of 582 genes, 4.5%	82 out of 7288 background genes, 1.1%	3.8e-07	ENP1:RRP7:RRP43:PWP2:RRP42:NHP2:DBP3:PRP43:RRP46:MTR3:SKI6:YGR251W:RRP4:IPI1:DBP8:RIX1:UTP30:SDO1:SIK1:CSL4:DBP6:RRP40:UTP23:NOP58:NOG1:RRP9	6402:154:6364:6365:910:27:28:42254:42255:30468:42273:54:30489:30490:391:16070:43330:31118
22618	protein-RNA complex assembly	35 out of 582 genes, 6.0%	140 out of 7288 background genes, 1.9%	5.63e-07	FUN12:RRP7:CDC40:RPL12A:PAB1:BRR2:TIF4632:DBP3:NSR1:SSF1:IPI1:NMD3:RIX1:SQT1:TIF2:SUI2:MAK11:RSA3:GCD7:PRP39:TIF11:NIP1:DBP6:BRX1:REX4:CDC33:RRP40:NOP8:RPL3:NOC2:GCD1:PRT1:RPL5:NIP7:RPL11A	6402:723:6412:6413:747:6364:6365:6446:184:348:27:28:42254:42255:42273:54:55:30489:389:74:395:396:8361
50657	nucleic acid transport	25 out of 582 genes, 4.3%	78 out of 7288 background genes, 1.1%	6.43e-07	HMT1:GBP2:ASM4:NUP84:NPL3:NIC96:NUP145:ARC1:NAB2:NUP49:BUD13:NUP82:NUP85:NUP100:LOS1:NUP133:NUP2:MFT1:NUP188:NUP53:PSE1:HRB1:NUP1:CEX1:MTR10	6403:6404:6405:6406:6407:6408:6409:723:6342:6418:6348:6368:6378:6388:6606:6607:6608:6609:42254:6974:6610:6611:282:16973:50000:6998:6999:55:59:398:6310:18195:7124:6259
50658	RNA transport	25 out of 582 genes, 4.3%	78 out of 7288 background genes, 1.1%	6.43e-07	HMT1:GBP2:ASM4:NUP84:NPL3:NIC96:NUP145:ARC1:NAB2:NUP49:BUD13:NUP82:NUP85:NUP100:LOS1:NUP133:NUP2:MFT1:NUP188:NUP53:PSE1:HRB1:NUP1:CEX1:MTR10	6403:6404:6405:6406:6407:6408:6409:723:6342:6418:6348:6368:6378:6388:6606:6607:6608:6609:42254:6974:6610:6611:282:16973:50000:6998:6999:55:59:398:6310:18195:7124:6259
51236	establishment of RNA localization	25 out of 582 genes, 4.3%	78 out of 7288 background genes, 1.1%	6.43e-07	HMT1:GBP2:ASM4:NUP84:NPL3:NIC96:NUP145:ARC1:NAB2:NUP49:BUD13:NUP82:NUP85:NUP100:LOS1:NUP133:NUP2:MFT1:NUP188:NUP53:PSE1:HRB1:NUP1:CEX1:MTR10	6403:6404:6405:6406:6407:6408:6409:723:6342:6418:6348:6368:6378:6388:6606:6607:6608:6609:42254:6974:6610:6611:282:16973:50000:6998:6999:55:59:398:6310:18195:7124:6259
51031	tRNA transport	15 out of 582 genes, 2.6%	29 out of 7288 background genes, 0.4%	7.6e-07	NUP84:NIC96:NUP145:ARC1:NUP49:NUP82:NUP85:NUP100:LOS1:NUP133:NUP2:NUP188:NUP53:NUP1:CEX1	6405:6406:6407:6408:6409:6342:6418:6348:6388:6606:6607:6608:6609:6974:6610:6611:50000:6998:6999:55:59:6259
6409	tRNA export from nucleus	15 out of 582 genes, 2.6%	29 out of 7288 background genes, 0.4%	7.6e-07	NUP84:NIC96:NUP145:ARC1:NUP49:NUP82:NUP85:NUP100:LOS1:NUP133:NUP2:NUP188:NUP53:NUP1:CEX1	6405:6406:6407:6408:6409:6342:6418:6348:6388:6606:6607:6608:6609:6974:6610:6611:50000:6998:6999:55:59:6259
9308	amine metabolic process	46 out of 582 genes, 7.9%	223 out of 7288 background genes, 3.1%	1.12e-06	CYS3:GCV3:YBL036C:SKT5:PRS4:GRS1:TYR1:HIS7:ARO4:HIS4:THR4:HOM2:SAM2:PCM1:SAH1:HOM3:SER3:ILV1:MET6:ARC1:MUQ1:VAS1:SER2:MES1:PRS3:THR1:HIS6:SER33:LYS12:MET18:LYS1:URA2:MET3:ILV3:ECM17:MAE1:GCV2:LYS9:PRS5:MET22:WRS1:GDH1:HTS1:ARO7:SPE3:YPR118W	8295:6409:723:16259:6418:42493:6353:6426:6427:162:6289:6431:6436:6438:6366:6520:19346:910:19856:6897:6534:6537:6970:42254:6038:6541:19509:6546:6549:8652:6045:19878:6555:6566:6207:6570:6646:9127:103:105:6730:6090:6166:9070:9073:96:42538:7047:9082:9085:9086:15940:6189:8361:9090:9092
51030	snRNA transport	13 out of 582 genes, 2.2%	23 out of 7288 background genes, 0.3%	2.49e-06	ASM4:NUP84:NIC96:NUP145:NUP49:NUP82:NUP85:NUP100:NUP133:NUP2:NUP188:NUP53:NUP1	6405:6406:6407:6408:6409:6342:6348:6388:6606:6607:6608:6609:6974:6610:6611:50000:6998:6999:55:59:6259
6408	snRNA export from nucleus	13 out of 582 genes, 2.2%	23 out of 7288 background genes, 0.3%	2.49e-06	ASM4:NUP84:NIC96:NUP145:NUP49:NUP82:NUP85:NUP100:NUP133:NUP2:NUP188:NUP53:NUP1	6405:6406:6407:6408:6409:6342:6348:6388:6606:6607:6608:6609:6974:6610:6611:50000:6998:6999:55:59:6259
6607	NLS-bearing substrate import into nucleus	13 out of 582 genes, 2.2%	23 out of 7288 background genes, 0.3%	2.49e-06	ASM4:NUP84:NIC96:NUP145:NUP49:NUP82:NUP85:NUP100:NUP133:NUP2:NUP188:NUP53:NUP1	6405:6406:6407:6408:6409:6342:6348:6388:6606:6607:6608:6609:6974:6610:6611:50000:6998:6999:55:59:6259
6608	snRNP protein import into nucleus	13 out of 582 genes, 2.2%	23 out of 7288 background genes, 0.3%	2.49e-06	ASM4:NUP84:NIC96:NUP145:NUP49:NUP82:NUP85:NUP100:NUP133:NUP2:NUP188:NUP53:NUP1	6405:6406:6407:6408:6409:6342:6348:6388:6606:6607:6608:6609:6974:6610:6611:50000:6998:6999:55:59:6259
6610	ribosomal protein import into nucleus	13 out of 582 genes, 2.2%	23 out of 7288 background genes, 0.3%	2.49e-06	ASM4:NUP84:NIC96:NUP145:NUP49:NUP82:NUP85:NUP100:NUP133:NUP2:NUP188:NUP53:NUP1	6405:6406:6407:6408:6409:6342:6348:6388:6606:6607:6608:6609:6974:6610:6611:50000:6998:6999:55:59:6259
43283	biopolymer metabolic process	240 out of 582 genes, 41.2%	2203 out of 7288 background genes, 30.2%	2.61e-06	PMT2:POP5:CYC3:MCM2:NCL1:YBL055C:SKT5:RER2:MNN2:HMT1:TRM7:RFC5:GRS1:SHE3:ABD1:ENP1:PAF1:RRP7:RRP43:PWP2:NHP10:SIR2:LHP1:TSR1:RRP42:NUP84:RPC53:FAP7:TRM8:NHP2:NOP6:PHO13:RRP8:RRP1:TRM1:MTQ2:RPA14:TAF10:RVB1:UME6:MNN10:GPI11:GPI8:CDC40:UTP5:URH1:STE14:UTP6:RMT2:KRE2:RBA50:EDC3:SPF1:ANP1:RAD23:GDA1:POL5:NUG1:SMB1:TPA1:NSA2:SPT15:CCA1:BRR2:DEG1:CDC14:RSC8:CKB1:RAD6:RPB9:DBP3:NUP145:ARC1:TAF6:PRP43:NA…	715:8298:6400:7131:6402:9749:6333:7062:6406:6334:6407:7064:6408:6409:7067:6265:31124:6338:7068:6267:6268:31055:1324:723:42994:5977:16255:6412:6413:6414:6342:6270:6418:6272:48017:42493:154:7076:18364:6348:1403:32447:46856:30846:30847:45047:6350:6353:6426:6427:6354:6281:6355:6356:6357:6359:6289:42144:747:8033:6431:6506:6360:6436:6364:6438:6365:6366:8610:7096:6367:6368:6369:8612:6298:31087:6873:6874…
6405	RNA export from nucleus	24 out of 582 genes, 4.1%	77 out of 7288 background genes, 1.1%	2.68e-06	HMT1:GBP2:ASM4:NUP84:NPL3:NIC96:NUP145:ARC1:NAB2:NUP49:BUD13:NUP82:NUP85:NUP100:LOS1:NUP133:NUP2:MFT1:NUP188:NUP53:PSE1:HRB1:NUP1:CEX1	6405:6406:6407:6408:6409:723:6342:6418:6348:6368:6378:6388:6606:6607:6608:6609:42254:6974:6610:6611:282:16973:50000:6998:6999:55:59:398:6310:18195:7124:6259
6999	nuclear pore organization and biogenesis	14 out of 582 genes, 2.4%	28 out of 7288 background genes, 0.4%	5.05e-06	ASM4:NUP84:NIC96:NUP145:NUP49:SNL1:NUP82:NUP85:NUP100:NUP133:NUP2:NUP188:NUP53:NUP1	6405:6406:6407:6408:6409:6342:6348:6457:6388:6606:6607:6608:6609:6974:6610:6611:50000:6998:6999:55:59:6259
9112	nucleobase metabolic process	15 out of 582 genes, 2.6%	33 out of 7288 background genes, 0.5%	7.51e-06	PRS4:ADE8:ADE5,7:ADE3:PRS3:URA2:URA6:URA1:MTD1:APT1:URA5:ADE4:AAH1:PRS5:ADE2	723:162:19856:42254:6541:6207:6139:9113:6144:6146:105:46084:6730:6164:6166:6167:6168:6189:8361:6760
6807	nitrogen compound metabolic process	47 out of 582 genes, 8.1%	244 out of 7288 background genes, 3.3%	7.66e-06	CYS3:GCV3:YBL036C:SKT5:PRS4:GRS1:TYR1:HIS7:ARO4:HIS4:THR4:HOM2:SAM2:PCM1:SAH1:HOM3:SER3:ILV1:MET6:ARC1:MUQ1:VAS1:SER2:MES1:PRS3:THR1:HIS6:SER33:LYS12:MET18:LYS1:URA2:MET3:ILV3:ECM17:MAE1:GCV2:URE2:LYS9:PRS5:MET22:WRS1:GDH1:HTS1:ARO7:SPE3:YPR118W	8295:6409:723:42994:16259:6418:42493:32447:6353:6426:6427:162:6289:6431:6436:6438:6366:10044:6520:19346:910:19856:6897:6534:6537:6970:42254:6038:6541:19509:6546:6549:8652:6045:19878:6555:6566:6207:6570:6646:9127:103:105:6730:6808:6090:6166:9070:9073:96:42538:7047:9082:9085:9086:15940:6189:8361:9090:9092
51028	mRNA transport	21 out of 582 genes, 3.6%	64 out of 7288 background genes, 0.9%	9.52e-06	HMT1:GBP2:ASM4:NUP84:NPL3:NIC96:NUP145:NAB2:NUP49:BUD13:NUP82:NUP85:NUP100:NUP133:NUP2:MFT1:NUP188:NUP53:PSE1:HRB1:NUP1	6405:6406:6407:6408:6409:723:6342:6348:6368:6378:6388:6606:6607:6608:6609:42254:6974:6610:6611:282:16973:50000:6998:6999:55:59:398:6310:18195:7124:6259
6406	mRNA export from nucleus	21 out of 582 genes, 3.6%	64 out of 7288 background genes, 0.9%	9.52e-06	HMT1:GBP2:ASM4:NUP84:NPL3:NIC96:NUP145:NAB2:NUP49:BUD13:NUP82:NUP85:NUP100:NUP133:NUP2:MFT1:NUP188:NUP53:PSE1:HRB1:NUP1	6405:6406:6407:6408:6409:723:6342:6348:6368:6378:6388:6606:6607:6608:6609:42254:6974:6610:6611:282:16973:50000:6998:6999:55:59:398:6310:18195:7124:6259
15931	nucleobase, nucleoside, nucleotide and nucleic acid transport	25 out of 582 genes, 4.3%	88 out of 7288 background genes, 1.2%	1.05e-05	HMT1:GBP2:ASM4:NUP84:NPL3:NIC96:NUP145:ARC1:NAB2:NUP49:BUD13:NUP82:NUP85:NUP100:LOS1:NUP133:NUP2:MFT1:NUP188:NUP53:PSE1:HRB1:NUP1:CEX1:MTR10	6403:6404:6405:6406:6407:6408:6409:723:6342:6418:6348:6368:6378:6388:6606:6607:6608:6609:42254:6974:6610:6611:282:16973:50000:6998:6999:55:59:398:6310:18195:7124:6259
42255	ribosome assembly	21 out of 582 genes, 3.6%	65 out of 7288 background genes, 0.9%	1.3e-05	RRP7:RPL12A:DBP3:NSR1:SSF1:IPI1:NMD3:RIX1:SQT1:MAK11:RSA3:DBP6:BRX1:REX4:RRP40:NOP8:RPL3:NOC2:RPL5:NIP7:RPL11A	6402:723:6412:747:6364:6365:27:28:42254:42255:42273:54:55:30489:8361
9126	purine nucleoside monophosphate metabolic process	11 out of 582 genes, 1.9%	18 out of 7288 background genes, 0.2%	1.42e-05	ADE1:PRS4:HIS7:ADE8:GUK1:ADE5,7:PRS3:APT1:ADE4:PRS5:ADE2	723:42493:162:42254:46037:6207:6144:9127:105:46084:6164:6166:6167:6168:6189:8361
51029	rRNA transport	13 out of 582 genes, 2.2%	26 out of 7288 background genes, 0.4%	1.81e-05	ASM4:NUP84:NIC96:NUP145:NUP49:NUP82:NUP85:NUP100:NUP133:NUP2:NUP188:NUP53:NUP1	6405:6406:6407:6408:6409:6342:6348:6388:6606:6607:6608:6609:6974:6610:6611:50000:6998:6999:55:59:6259
6407	rRNA export from nucleus	13 out of 582 genes, 2.2%	26 out of 7288 background genes, 0.4%	1.81e-05	ASM4:NUP84:NIC96:NUP145:NUP49:NUP82:NUP85:NUP100:NUP133:NUP2:NUP188:NUP53:NUP1	6405:6406:6407:6408:6409:6342:6348:6388:6606:6607:6608:6609:6974:6610:6611:50000:6998:6999:55:59:6259
9123	nucleoside monophosphate metabolic process	11 out of 582 genes, 1.9%	19 out of 7288 background genes, 0.3%	3.14e-05	ADE1:PRS4:HIS7:ADE8:GUK1:ADE5,7:PRS3:APT1:ADE4:PRS5:ADE2	723:42493:162:42254:46037:6207:6144:9127:105:46084:6164:6166:6167:6168:6189:8361
27	ribosomal large subunit assembly and maintenance	16 out of 582 genes, 2.7%	41 out of 7288 background genes, 0.6%	3.41e-05	RPL12A:DBP3:SSF1:IPI1:NMD3:RIX1:SQT1:MAK11:RSA3:DBP6:BRX1:NOP8:RPL3:RPL5:NIP7:RPL11A	6412:747:6364:6365:27:42254:42273:54:55:30489:8361
9127	purine nucleoside monophosphate biosynthetic process	10 out of 582 genes, 1.7%	16 out of 7288 background genes, 0.2%	4.93e-05	ADE1:PRS4:HIS7:ADE8:ADE5,7:PRS3:APT1:ADE4:PRS5:ADE2	723:42493:162:42254:6207:6144:9127:105:46084:6164:6166:6167:6168:6189:8361
65003	macromolecular complex assembly	53 out of 582 genes, 9.1%	310 out of 7288 background genes, 4.3%	5.92e-05	FUN12:CYC3:NUP60:MCM2:RRP7:ASM4:TAF10:CDC40:RPL12A:SPT15:PAB1:BRR2:TIF4632:DBP3:TAF6:NSR1:SSF1:IPI1:NMD3:RIX1:SQT1:TIF2:SUI2:MAK11:TFA1:SRP21:RSA3:GCD7:PRP39:CAC2:SEC65:NUP53:TAF9:TIF11:NIP1:BDP1:BNI5:DBP6:BRX1:REX4:CDC33:RRP40:NOP8:NOB1:RPL3:NOC2:GCD1:VPH1:PRT1:RPL5:NIP7:SUA7:RPL11A	6402:6406:6334:6407:6408:6409:6267:6268:6913:723:6412:6413:6342:6270:45047:6281:747:6797:6360:6364:6365:6366:6367:6446:184:6383:6384:910:6461:6607:6608:6609:348:27:28:921:42254:42255:6610:6611:6617:6473:18063:42273:42274:6999:54:55:59:30489:30490:389:16568:74:395:396:43248:16573:7035:114:6325:8361
6400	tRNA modification	17 out of 582 genes, 2.9%	48 out of 7288 background genes, 0.7%	6.9e-05	NCL1:TRM7:TRM8:TRM1:CCA1:GCD14:KTI12:DUS4:TRM12:TRM9:DUS1:SMM1:RIB2:TRM10:TRM11:MOD5:PUS1	6400:6412:6357:8033:6950:42254:16049:30488:9231:31119
42257	ribosomal subunit assembly	18 out of 582 genes, 3.1%	54 out of 7288 background genes, 0.7%	8.33e-05	RRP7:RPL12A:DBP3:NSR1:SSF1:IPI1:NMD3:RIX1:SQT1:MAK11:RSA3:DBP6:BRX1:NOP8:RPL3:RPL5:NIP7:RPL11A	723:6412:747:6364:6365:27:28:42254:42273:54:55:30489:8361
9124	nucleoside monophosphate biosynthetic process	10 out of 582 genes, 1.7%	17 out of 7288 background genes, 0.2%	0.00011	ADE1:PRS4:HIS7:ADE8:ADE5,7:PRS3:APT1:ADE4:PRS5:ADE2	723:42493:162:42254:6207:6144:9127:105:46084:6164:6166:6167:6168:6189:8361
9161	ribonucleoside monophosphate metabolic process	10 out of 582 genes, 1.7%	17 out of 7288 background genes, 0.2%	0.00011	ADE1:PRS4:ADE8:GUK1:ADE5,7:PRS3:APT1:ADE4:PRS5:ADE2	723:42493:162:42254:46037:6207:6144:105:46084:6164:6166:6167:6168:6189:8361
9167	purine ribonucleoside monophosphate metabolic process	10 out of 582 genes, 1.7%	17 out of 7288 background genes, 0.2%	0.00011	ADE1:PRS4:ADE8:GUK1:ADE5,7:PRS3:APT1:ADE4:PRS5:ADE2	723:42493:162:42254:46037:6207:6144:105:46084:6164:6166:6167:6168:6189:8361
6725	aromatic compound metabolic process	18 out of 582 genes, 3.1%	56 out of 7288 background genes, 0.8%	0.00015	PRS4:TYR1:ARO4:ADE8:ADE5,7:ADE3:PRS3:URA2:URA6:URA1:MTD1:APT1:URA5:ADE4:AAH1:PRS5:ADE2:ARO7	723:162:19856:42254:6541:6207:6139:9113:6570:6144:6146:105:46084:6730:6164:6166:6167:6168:9073:6189:8361:6760
30488	tRNA methylation	9 out of 582 genes, 1.5%	15 out of 7288 background genes, 0.2%	0.00039	NCL1:TRM7:TRM8:TRM1:GCD14:TRM12:TRM9:TRM10:TRM11	6412:6950:42254:30488
9156	ribonucleoside monophosphate biosynthetic process	9 out of 582 genes, 1.5%	15 out of 7288 background genes, 0.2%	0.00039	ADE1:PRS4:ADE8:ADE5,7:PRS3:APT1:ADE4:PRS5:ADE2	723:42493:162:42254:6207:6144:105:46084:6164:6166:6167:6168:6189:8361
9168	purine ribonucleoside monophosphate biosynthetic process	9 out of 582 genes, 1.5%	15 out of 7288 background genes, 0.2%	0.00039	ADE1:PRS4:ADE8:ADE5,7:PRS3:APT1:ADE4:PRS5:ADE2	723:42493:162:42254:6207:6144:105:46084:6164:6166:6167:6168:6189:8361
32502	developmental process	102 out of 582 genes, 17.5%	808 out of 7288 background genes, 11.1%	0.00081	FUN12:CYC3:NUP60:MCM2:YBL055C:SHE3:RRP7:PWP2:SIR2:ASM4:SHS1:RPA14:TAF10:UME6:CDC40:NPL3:RPL12A:BOI2:SHO1:PMD1:SPT15:PEA2:PAB1:BRR2:BUD27:CKB1:TIF4632:DBP3:LSG1:TAF6:ITC1:BUD13:RSR1:NSR1:BUD32:PRS3:SSF1:STE12:IPI1:CDC12:NMD3:RIX1:SCH9:CKA1:SDS3:SQT1:YVH1:TIF2:SET2:SUI2:HMS2:LAC1:MAK11:TFA1:KTI12:SRP21:SHE2:PXL1:ENT4:BUD20:RSA3:GCD7:NUP2:SFP1:PRP39:CAC2:SEC65:SOK2:NUP53:EFR3:TAF9:TIF11:NIP1:BDP1:NC…	7568:8298:6400:6402:7131:9749:6406:6333:6334:6407:6408:6409:6338:147:7068:6267:6268:1324:6913:6915:723:5977:6412:6413:6342:6270:42493:6348:1403:45047:6281:6354:162:6355:6356:6357:6359:747:6797:7232:6360:6364:6365:6366:7096:6367:750:6873:46513:6446:183:184:30435:30437:902:6887:7329:6383:6384:910:30447:46020:6892:6897:31684:6461:6607:7264:6608:6609:6464:7266:19358:348:6468:27:28:921:42254:42255:697…
6360	transcription from RNA polymerase I promoter	12 out of 582 genes, 2.1%	30 out of 7288 background genes, 0.4%	0.00133	RPA14:SPT15:CKB1:CKA1:RPA34:RPA12:GTR1:RPC19:RPB10:RPB8:RPA43:RPA190	723:6356:6359:6360:6366:6367:6873:6383:6384:6468:42254:6974:30468:501:82:86:6817:8361
6605	protein targeting	42 out of 582 genes, 7.2%	245 out of 7288 background genes, 3.4%	0.00137	ECM1:NUP60:AST1:KAP104:SSH1:ASM4:NUP84:ENT5:BCP1:KAP123:NIC96:NUP145:LSG1:NUP49:CSE1:NMD3:RIX1:NUP82:NUP85:NMD5:NUP100:SRP21:NUP133:SEC72:NUP2:VPS9:NUP188:SEC65:NUP53:PSE1:YDJ1:URE2:MAS6:SIL1:VPS21:NUP1:MTR10:NOC2:VTS1:NOG1:SEC62:NOP53	6403:6404:6405:6406:6407:6408:6409:6913:723:42994:6342:42493:6348:32447:45047:747:6365:30433:30437:10044:6458:6388:6895:6897:6605:6606:6607:6608:6609:43488:27:42254:42255:6974:6610:6611:6612:6613:6616:6617:6620:6623:6626:42273:50000:6998:6999:54:55:59:30489:6808:30150:42026:7047:7049:6259
6163	purine nucleotide metabolic process	15 out of 582 genes, 2.6%	46 out of 7288 background genes, 0.6%	0.00138	ADE1:PRS4:HIS7:HPT1:ADE8:GUK1:ADE5,7:PRS3:IMD3:APT1:AMD1:ADE4:ADE12:PRS5:ADE2	723:42493:162:42254:46037:6207:6144:9127:105:46084:46086:6163:6164:6166:6167:6168:32263:32264:6183:6189:8361
46112	nucleobase biosynthetic process	10 out of 582 genes, 1.7%	21 out of 7288 background genes, 0.3%	0.0015	PRS4:ADE8:ADE3:PRS3:URA2:URA6:URA1:MTD1:URA5:PRS5	723:162:19856:42254:6541:6207:6139:9113:105:46084:6730:6164:6166:6189:8361:6760
19752	carboxylic acid metabolic process	49 out of 582 genes, 8.4%	308 out of 7288 background genes, 4.2%	0.00175	CYS3:GCV3:YBL036C:PRS4:VID24:GRS1:TYR1:HIS7:ARO4:HIS4:FEN1:THR4:TSC13:DLD2:HOM2:SAM2:SAH1:HOM3:SER3:ILV1:MET6:ARC1:VAS1:ADE3:SER2:MES1:PRS3:THR1:HIS6:SER33:LYS12:MET18:LYS1:URA2:MET3:ILV3:ECM17:MAE1:SUR4:GCV2:LYS9:PRS5:MET22:WRS1:LIP5:GDH1:HTS1:ARO7:YPR118W	6409:723:16259:6418:42493:16192:6353:6426:6427:162:6289:6431:6436:6438:6366:6520:19346:45721:19856:6892:6897:6534:6537:42254:6541:19509:6546:6549:38:8652:19878:6555:9105:6633:6566:6207:9113:6570:30497:9127:103:105:6089:6730:30148:6090:6166:9070:9073:96:42538:7047:9082:9085:9086:6189:8361:9090:9092:6760
6082	organic acid metabolic process	49 out of 582 genes, 8.4%	308 out of 7288 background genes, 4.2%	0.00175	CYS3:GCV3:YBL036C:PRS4:VID24:GRS1:TYR1:HIS7:ARO4:HIS4:FEN1:THR4:TSC13:DLD2:HOM2:SAM2:SAH1:HOM3:SER3:ILV1:MET6:ARC1:VAS1:ADE3:SER2:MES1:PRS3:THR1:HIS6:SER33:LYS12:MET18:LYS1:URA2:MET3:ILV3:ECM17:MAE1:SUR4:GCV2:LYS9:PRS5:MET22:WRS1:LIP5:GDH1:HTS1:ARO7:YPR118W	6409:723:16259:6418:42493:16192:6353:6426:6427:162:6289:6431:6436:6438:6366:6520:19346:45721:19856:6892:6897:6534:6537:42254:6541:19509:6546:6549:38:8652:19878:6555:9105:6633:6566:6207:9113:6570:30497:9127:103:105:6089:6730:30148:6090:6166:9070:9073:96:42538:7047:9082:9085:9086:6189:8361:9090:9092:6760
46040	IMP metabolic process	8 out of 582 genes, 1.4%	14 out of 7288 background genes, 0.2%	0.003	ADE1:PRS4:ADE8:ADE5,7:PRS3:ADE4:PRS5:ADE2	723:42493:162:42254:6207:6144:105:46084:6164:6166:6189:8361
6188	IMP biosynthetic process	8 out of 582 genes, 1.4%	14 out of 7288 background genes, 0.2%	0.003	ADE1:PRS4:ADE8:ADE5,7:PRS3:ADE4:PRS5:ADE2	723:42493:162:42254:6207:6144:105:46084:6164:6166:6189:8361
6189	'de novo' IMP biosynthetic process	8 out of 582 genes, 1.4%	14 out of 7288 background genes, 0.2%	0.003	ADE1:PRS4:ADE8:ADE5,7:PRS3:ADE4:PRS5:ADE2	723:42493:162:42254:6207:6144:105:46084:6164:6166:6189:8361
6886	intracellular protein transport	43 out of 582 genes, 7.4%	261 out of 7288 background genes, 3.6%	0.00305	ECM1:NUP60:AST1:KAP104:SSH1:ASM4:NUP84:ENT5:BCP1:KAP123:NIC96:NUP145:LSG1:NUP49:CSE1:NMD3:RIX1:NUP82:NUP85:NMD5:NUP100:SRP21:NUP133:SEC72:NUP2:VPS9:NUP188:SEC65:NUP53:PSE1:YDJ1:URE2:MAS6:SIL1:VPS21:NUP1:MTR10:NOC2:VTS1:MRS6:NOG1:SEC62:NOP53	6403:6404:6405:6406:6407:6408:6409:6913:723:42994:6342:42493:6348:32447:45047:747:6365:30433:30437:10044:6886:6458:6388:6895:6897:6605:6606:6607:6608:6609:43488:27:42254:42255:6974:6610:6611:6612:6613:6616:6617:6620:6623:6626:42273:50000:6998:6999:54:55:59:30489:6808:30150:42026:7047:7049:6259
6997	nuclear organization and biogenesis	16 out of 582 genes, 2.7%	55 out of 7288 background genes, 0.8%	0.00341	YBL055C:ASM4:NUP84:NIC96:NUP145:NUP49:SNL1:NUP82:NUP85:NUP100:NUP133:NUP2:NUP188:NUP53:YNL313C:NUP1	6405:6406:6407:6408:6409:6342:6348:742:6457:6388:6606:6607:6608:6609:6974:6979:6610:6611:50000:6998:6999:55:59:6309:6259
6555	methionine metabolic process	10 out of 582 genes, 1.7%	23 out of 7288 background genes, 0.3%	0.0042	HOM2:SAM2:SAH1:HOM3:MET6:THR1:MET18:MET3:MET22:YPR118W	723:16259:42493:6289:6366:19509:6549:6555:6566:103:42538:9086:9090:9092
44271	nitrogen compound biosynthetic process	24 out of 582 genes, 4.1%	111 out of 7288 background genes, 1.5%	0.00491	PRS4:HIS7:ARO4:HIS4:HOM2:HOM3:SER3:ILV1:MET6:MUQ1:SER2:PRS3:HIS6:SER33:LYS12:LYS1:ILV3:ECM17:LYS9:PRS5:MET22:GDH1:ARO7:SPE3	8295:723:42493:162:6537:42254:8652:19878:6555:6566:6207:6646:9127:103:105:6166:9070:9073:42538:7047:9082:9085:9086:15940:6189:8361:9090
9309	amine biosynthetic process	24 out of 582 genes, 4.1%	111 out of 7288 background genes, 1.5%	0.00491	PRS4:HIS7:ARO4:HIS4:HOM2:HOM3:SER3:ILV1:MET6:MUQ1:SER2:PRS3:HIS6:SER33:LYS12:LYS1:ILV3:ECM17:LYS9:PRS5:MET22:GDH1:ARO7:SPE3	8295:723:42493:162:6537:42254:8652:19878:6555:6566:6207:6646:9127:103:105:6166:9070:9073:42538:7047:9082:9085:9086:15940:6189:8361:9090
15031	protein transport	43 out of 582 genes, 7.4%	267 out of 7288 background genes, 3.7%	0.00558	ECM1:NUP60:AST1:KAP104:SSH1:ASM4:NUP84:ENT5:BCP1:KAP123:NIC96:NUP145:LSG1:NUP49:CSE1:NMD3:RIX1:NUP82:NUP85:NMD5:NUP100:SRP21:NUP133:SEC72:NUP2:VPS9:NUP188:SEC65:NUP53:PSE1:YDJ1:URE2:MAS6:SIL1:VPS21:NUP1:MTR10:NOC2:VTS1:MRS6:NOG1:SEC62:NOP53	6403:6404:6405:6406:6407:6408:6409:6913:723:42994:6342:42493:6348:32447:45047:747:6365:30433:30437:10044:6886:6458:6388:6895:6897:6605:6606:6607:6608:6609:43488:27:42254:42255:6974:6610:6611:6612:6613:6616:6617:6620:6623:6626:42273:50000:6998:6999:54:55:59:30489:6808:30150:42026:7047:7049:6259
9066	aspartate family amino acid metabolic process	14 out of 582 genes, 2.4%	45 out of 7288 background genes, 0.6%	0.00585	THR4:HOM2:SAM2:SAH1:HOM3:MET6:THR1:LYS12:MET18:LYS1:MET3:LYS9:MET22:YPR118W	723:16259:42493:6289:6366:6897:19509:6549:19878:6555:6566:103:42538:9085:9086:9090:9092
9069	serine family amino acid metabolic process	10 out of 582 genes, 1.7%	24 out of 7288 background genes, 0.3%	0.00669	CYS3:GCV3:HOM2:SAH1:HOM3:SER3:SER2:THR1:SER33:GCV2	723:16259:42493:19346:6534:6546:6549:6555:6566:6730:9070:96:9090:9092
45184	establishment of protein localization	44 out of 582 genes, 7.6%	279 out of 7288 background genes, 3.8%	0.00759	ECM1:NUP60:AST1:KAP104:SSH1:ASM4:NUP84:ENT5:BCP1:KAP123:NIC96:NUP145:LSG1:NUP49:CSE1:NMD3:RIX1:NUP82:NUP85:NMD5:NUP100:SRP21:NUP133:SEC72:NUP2:VPS9:NUP188:SEC65:NUP53:PSE1:YDJ1:URE2:MAS6:SIL1:VPS21:NUP1:MTR10:NOC2:VTS1:MRS6:NOG1:SEC62:NOP53:YLH47	6403:6404:6405:6406:6407:6408:6409:6913:723:42994:6342:42493:6348:32447:45047:747:6365:30433:30437:10044:6886:6458:51204:6388:6895:6897:6605:6606:6607:6608:6609:43488:27:42254:42255:6974:6610:6611:6612:6613:6616:6617:6620:6623:6626:42273:50000:6998:6999:54:55:59:30489:6808:30150:42026:7047:7049:6259
46907	intracellular transport	70 out of 582 genes, 12.0%	526 out of 7288 background genes, 7.2%	0.00927	ECM1:NUP60:AST1:RER2:KAP104:HMT1:REI1:SSH1:APM3:GBP2:RHB1:ASM4:NUP84:COP1:ENT5:SEC7:BCP1:NPL3:AGE1:GET2:KAP123:GLO3:NIC96:NUP145:LSG1:ARC1:NAB2:NUP49:BUD13:CSE1:COG2:NMD3:RIX1:NUP82:SOP4:NUP85:NMD5:NUP100:SRP21:LOS1:NUP133:SEC72:NUP2:SUR4:MFT1:COG8:VPS9:NUP188:SEC65:NUP53:RSN1:PSE1:FET4:HRB1:YDJ1:URE2:MAS6:SIL1:VPS21:NUP1:CEX1:MTR10:NOC2:RUD3:VTS1:MRS6:NOG1:SEC62:KES1:NOP53	6403:6404:6405:6406:6407:6408:6409:6913:723:42994:6342:6418:42493:6348:32447:16192:301:45047:42147:747:6365:6368:19408:30433:6378:30437:10044:6886:6887:6888:6458:6388:6890:6891:6892:6893:6895:6896:6897:6605:6606:48205:6607:6608:6609:43488:27:278:42254:42255:6974:6610:6611:6612:6613:6616:6617:282:30469:15809:6620:6623:6626:40:6486:16973:42273:50000:6998:15819:6999:15677:6633:54:55:59:30489:15680:3…
6402	mRNA catabolic process	16 out of 582 genes, 2.7%	59 out of 7288 background genes, 0.8%	0.00931	RRP43:RRP42:EDC3:TPA1:UPF3:RRP46:MTR3:SKI6:RRP4:NOT3:MRT4:CSL4:POP2:CDC33:RRP40:SKI3	6402:723:6413:6357:6364:6365:6368:31087:184:6451:42254:42255:288:289:42273:16567:74:43330
17038	protein import	21 out of 582 genes, 3.6%	93 out of 7288 background genes, 1.3%	0.00939	NUP60:KAP104:ASM4:NUP84:KAP123:NIC96:NUP145:NUP49:NUP82:NUP85:NMD5:NUP100:NUP133:NUP2:NUP188:NUP53:PSE1:URE2:MAS6:NUP1:MTR10	6403:6404:6405:6406:6407:6408:6409:6913:723:42994:6342:6348:32447:10044:6388:6606:6607:6608:6609:6974:6610:6611:50000:6998:6999:55:59:6808:30150:7049:6259
43412	biopolymer modification	82 out of 582 genes, 14.1%	646 out of 7288 background genes, 8.9%	0.00948	PMT2:CYC3:NCL1:RER2:MNN2:HMT1:TRM7:PAF1:TRM8:NHP2:PHO13:TRM1:MTQ2:TAF10:UME6:MNN10:GPI11:GPI8:STE14:RMT2:KRE2:SPF1:ANP1:GDA1:CCA1:CDC14:CKB1:RAD6:TAF6:CAX4:BUD32:ARD1:DYS1:SCH9:CKA1:NOT3:SDS3:GCD14:SET2:MNN11:MNN5:JJJ3:KTI12:CTK1:DPH2:SAC1:SIK1:DUS4:CDC73:TRM12:TRM9:DUS1:CTK3:VAN1:TAF9:FCP1:NCS2:YCK2:UBP10:URE2:CLA4:PFA3:SMM1:BRE5:RIB2:TRM10:TRM11:CTR9:NAT5:MOD5:NOP58:SKS1:SGF11:MNN9:GPI2:CTI6:PU…	6400:7131:9749:6406:31124:7068:1324:723:42994:16255:6412:6342:48017:42493:154:18364:6348:1403:32447:46856:6350:6354:6281:6355:6356:6357:6359:42144:8033:6506:6365:6366:8610:7096:6367:6368:8612:6873:6874:17157:6511:6513:19408:30437:902:6950:10044:6887:6888:7323:910:917:6897:7266:6464:6468:42254:6974:17183:6470:32:6473:6474:282:289:30468:18063:501:6486:6487:18216:6491:6493:7001:45836:16049:30488:157…
Function
GOID	GO_term	Cluster frequency	Background frequency	P-value	Gene(s) annotated to the term	Directly Annotated GOID List
3824	catalytic activity	252 out of 582 genes, 43.3%	1988 out of 7288 background genes, 27.3%	1.33e-15	CYS3:PMT2:POP5:FUN12:CYC3:GCV3:ADE1:MCM2:NCL1:YBL036C:YBL055C:PRS4:ILS1:MAP2:RER2:MNN2:YBR028C:HMT1:TRM7:RFC5:GRS1:VMA2:TYR1:ABD1:HIS7:ARO4:DUT1:HIS4:APA1:RHB1:FEN1:RRP43:THR4:TSC13:SIR2:RRP42:RPC53:FAP7:DLD2:TRM8:YPD1:PHO13:LCB2:RRP8:TRM1:MTQ2:RPA14:HOM2:RVB1:UME6:MNN10:SUR2:GPI11:GPI8:YPS7:TRR1:HPT1:URH1:ADE8:STE14:GUK1:RMT2:KRE2:SAM2:SPF1:ANP1:GDA1:POL5:PCM1:NUG1:SAH1:HOM3:HOR2:SER3:ILV1:MET6:…	16966:8296:4152:51082:210:4516:4088:213:4518:4372:16462:42626:51730:4519:4730:15662:4375:51377:4809:4592:4012:51015:8441:3938:16757:4013:4596:3869:4019:47429:42054:43141:16251:4160:4306:4309:50291:4239:3723:4169:3724:4526:4810:4811:4382:31202:4385:4458:5545:4671:8236:4672:3871:42781:4674:9:16765:8094:4749:8168:3876:3949:45547:4170:17136:8677:4820:4821:4822:4825:4680:4681:4754:4755:8173:4682:4399:…
30515	snoRNA binding	13 out of 582 genes, 2.2%	28 out of 7288 background genes, 0.4%	2.58e-05	ENP1:PWP2:UTP5:UTP6:SLX9:UTP8:UTP9:UTP10:UTP13:UTP14:UTP15:NAN1:RRP9	30515
16740	transferase activity	94 out of 582 genes, 16.2%	694 out of 7288 background genes, 9.5%	4.18e-05	PMT2:NCL1:PRS4:RER2:MNN2:YBR028C:HMT1:TRM7:ABD1:HIS7:ARO4:FEN1:RPC53:TRM8:YPD1:LCB2:RRP8:TRM1:MTQ2:RPA14:MNN10:GPI11:HPT1:ADE8:STE14:GUK1:RMT2:KRE2:SAM2:ANP1:POL5:HOM3:MET6:CCA1:RPB9:MUQ1:BUD32:PRS3:ARD1:THR1:DYS1:SCH9:RPB3:CKA1:TRL1:GCD14:URA2:RPA34:SET2:MNN11:MNN5:MET3:RPA12:HOC1:AUR1:LAC1:URA6:CTK1:SHM2:SUR4:TRM12:TRM9:APT1:URA5:CTK3:VAN1:LCB1:ADE4:NOP2:RPC19:YCK2:RIO2:CLA4:PFA3:PRS5:TRM10:PAP…	4516:4088:4372:51730:51377:4809:51015:16757:4596:42054:4306:50291:3723:4169:4810:4811:4385:4671:4672:3871:4674:9:16765:4749:8168:45547:4680:4681:8173:4682:16772:3881:8175:5487:4758:8176:3887:8757:16274:4478:4766:4693:4113:4044:3899:16423:9922:16428:16429:107:4482:3972:8194:4849:16431:4413:45140:19706:4781:8276:4422:5515:4644:3849:26:4070:4072:3999:30674:46975:4652:30:4659:4588
8408	3'-5' exonuclease activity	13 out of 582 genes, 2.2%	30 out of 7288 background genes, 0.4%	7.11e-05	YBL055C:RRP43:RRP42:RRP46:MTR3:SKI6:RRP4:NOT3:REX2:CSL4:POP2:REX4:RRP40	8296:4519:3723:175:4842:8408
175	3'-5'-exoribonuclease activity	10 out of 582 genes, 1.7%	18 out of 7288 background genes, 0.2%	0.0001	RRP43:RRP42:RRP46:MTR3:SKI6:RRP4:NOT3:CSL4:POP2:RRP40	3723:175:4842
16741	transferase activity, transferring one-carbon groups	22 out of 582 genes, 3.8%	85 out of 7288 background genes, 1.2%	0.00022	NCL1:HMT1:TRM7:ABD1:TRM8:RRP8:TRM1:MTQ2:ADE8:STE14:RMT2:MET6:GCD14:URA2:SET2:SHM2:TRM12:TRM9:NOP2:TRM10:TRM11:ABP140	4088:4372:4809:51015:42054:3723:4671:3871:8168:8173:8175:8176:8757:16274:16423:16428:16429:4482:16431:8276:5515:4644:4070:30674:46975
8168	methyltransferase activity	21 out of 582 genes, 3.6%	83 out of 7288 background genes, 1.1%	0.00061	NCL1:HMT1:TRM7:ABD1:TRM8:RRP8:TRM1:MTQ2:ADE8:STE14:RMT2:MET6:GCD14:SET2:SHM2:TRM12:TRM9:NOP2:TRM10:TRM11:ABP140	4372:4809:51015:42054:3723:4671:3871:8168:8173:8175:8176:8757:16274:16423:16428:16429:4482:16431:8276:5515:4644:30674:46975
16896	exoribonuclease activity, producing 5'-phosphomonoesters	10 out of 582 genes, 1.7%	23 out of 7288 background genes, 0.3%	0.00193	RRP43:RRP42:RRP46:MTR3:SKI6:RRP4:NOT3:CSL4:POP2:RRP40	3723:175:4842
4532	exoribonuclease activity	10 out of 582 genes, 1.7%	23 out of 7288 background genes, 0.3%	0.00193	RRP43:RRP42:RRP46:MTR3:SKI6:RRP4:NOT3:CSL4:POP2:RRP40	3723:175:4842
8173	RNA methyltransferase activity	10 out of 582 genes, 1.7%	24 out of 7288 background genes, 0.3%	0.00308	NCL1:TRM7:ABD1:TRM8:TRM1:GCD14:TRM9:NOP2:TRM10:TRM11	4809:3723:8173:8175:8176:8757:16423:16428:16429:4482:16431:5515
4527	exonuclease activity	13 out of 582 genes, 2.2%	41 out of 7288 background genes, 0.6%	0.00459	YBL055C:RRP43:RRP42:RRP46:MTR3:SKI6:RRP4:NOT3:REX2:CSL4:POP2:REX4:RRP40	8296:4519:3723:175:4842:8408
16796	exonuclease activity, active with either ribo- or deoxyribonucleic acids and producing 5'-phosphomonoesters	11 out of 582 genes, 1.9%	30 out of 7288 background genes, 0.4%	0.00462	YBL055C:RRP43:RRP42:RRP46:MTR3:SKI6:RRP4:NOT3:CSL4:POP2:RRP40	8296:4519:3723:175:4842
8175	tRNA methyltransferase activity	8 out of 582 genes, 1.4%	16 out of 7288 background genes, 0.2%	0.00513	NCL1:TRM7:TRM8:TRM1:GCD14:TRM9:TRM10:TRM11	4809:3723:8175:8176:8757:16423:16428:16429:16431:5515
Component
GOID	GO_term	Cluster frequency	Background frequency	P-value	Gene(s) annotated to the term	Directly Annotated GOID List
44464	cell part	576 out of 582 genes, 99.0%	5495 out of 7288 background genes, 75.4%	5.1e-62	CYS3:FUN30:PMT2:POP5:FUN12:RBG1:CYC3:GCV3:ECM1:NUP60:ADE1:MCM2:NCL1:YBL036C:YBL055C:SKT5:PRS4:AST1:ILS1:MAP2:YBL104C:RER2:MNN2:KAP104:YBR025C:YBR028C:HMT1:TRM7:TAT1:RFC5:VID24:PHO88:GRS1:VMA2:SHE3:SUP45:CNS1:TYR1:SMY2:MCX1:ABD1:YBR242W:ENP1:HIS7:ARO4:DUT1:REI1:PAF1:SSH1:APM3:GBP2:HIS4:RRP7:SRO9:APA1:RHB1:FEN1:RRP43:YCR043C:YCR051W:THR4:CTR86:PWP2:TAH1:NHP10:TSC13:SIR2:LHP1:TSR1:ASM4:RRP42:NUP84:Y…	5677:5960:5678:17119:932:790:30684:46695:30686:214:30687:30688:42555:144:502:506:508:31415:5681:5682:5829:31417:5685:5758:5759:299:30478:30479:30690:30691:17059:220:221:31499:228:31207:5830:5834:31428:5768:32806:300:8023:30123:5622:19897:30125:42645:19898:30126:5624:5625:18444:5840:5842:5843:5770:5844:5845:9337:812:5774:5847:5777:45121:16272:43529:243:30136:30137:5634:172:5635:5637:176:5850:177:5…
5622	intracellular	556 out of 582 genes, 95.5%	5087 out of 7288 background genes, 69.8%	6.96e-57	CYS3:FUN30:PMT2:POP5:FUN12:RBG1:CYC3:GCV3:ECM1:NUP60:ADE1:MCM2:NCL1:YBL036C:YBL055C:SKT5:PRS4:ILS1:MAP2:YBL104C:RER2:MNN2:KAP104:YBR025C:YBR028C:HMT1:TRM7:RFC5:VID24:PHO88:GRS1:VMA2:SHE3:SUP45:CNS1:TYR1:SMY2:MCX1:ABD1:YBR242W:ENP1:HIS7:ARO4:DUT1:REI1:PAF1:SSH1:APM3:GBP2:HIS4:RRP7:SRO9:APA1:FEN1:RRP43:YCR043C:YCR051W:THR4:CTR86:PWP2:TAH1:NHP10:TSC13:SIR2:LHP1:TSR1:ASM4:RRP42:NUP84:YDL121C:COP1:RPC…	5677:5960:5678:17119:932:790:30684:46695:30686:214:30687:30688:42555:144:502:506:508:31415:5681:5682:5829:31417:5685:5758:5759:299:30478:30479:30690:30691:17059:220:221:31499:228:31207:5830:31428:5768:32806:300:8023:30123:30125:5622:42645:30126:19898:5624:5625:18444:5840:5842:5770:5843:5844:5845:9337:812:5774:5847:5777:45121:16272:43529:243:30136:30137:5634:5635:172:5637:176:5850:177:5851:5852:57…
44424	intracellular part	552 out of 582 genes, 94.8%	5052 out of 7288 background genes, 69.3%	1.53e-54	CYS3:FUN30:PMT2:POP5:FUN12:RBG1:CYC3:GCV3:ECM1:NUP60:ADE1:MCM2:NCL1:YBL055C:SKT5:PRS4:ILS1:MAP2:YBL104C:RER2:MNN2:KAP104:YBR025C:YBR028C:HMT1:TRM7:RFC5:VID24:PHO88:GRS1:VMA2:SHE3:SUP45:CNS1:TYR1:SMY2:MCX1:ABD1:YBR242W:ENP1:ARO4:DUT1:REI1:PAF1:SSH1:APM3:GBP2:RRP7:SRO9:APA1:FEN1:RRP43:YCR043C:YCR051W:THR4:CTR86:PWP2:TAH1:NHP10:TSC13:SIR2:LHP1:TSR1:ASM4:RRP42:NUP84:YDL121C:COP1:RPC53:FAP7:NRP1:DLD2:…	5677:5960:5678:17119:932:790:30684:46695:30686:214:30687:30688:42555:144:502:506:508:31415:5681:5682:5829:31417:5685:5758:5759:299:30478:30479:30690:30691:17059:220:221:31499:228:31207:5830:31428:5768:32806:300:8023:30123:5622:30125:42645:30126:19898:5624:5625:18444:5840:5842:5770:5843:5844:5845:9337:812:5774:5847:5777:45121:16272:43529:243:30136:30137:5634:5635:172:5637:176:5850:177:5851:5852:57…
5634	nucleus	268 out of 582 genes, 46.0%	1994 out of 7288 background genes, 27.4%	1.88e-21	FUN30:POP5:ECM1:NUP60:ADE1:MCM2:NCL1:HMT1:ABD1:YBR242W:ENP1:ARO4:DUT1:PAF1:GBP2:RRP7:APA1:RRP43:YCR051W:THR4:PWP2:TAH1:NHP10:SIR2:LHP1:TSR1:ASM4:RRP42:NUP84:RPC53:FAP7:TRM8:NHP2:NOP6:PHO13:RRP8:RRP1:ARX1:TRM1:MTQ2:RPA14:HOM2:YDR161W:TAF10:RVB1:UME6:SET7:BCP1:CDC40:UTP5:HPT1:URH1:ADE8:NPL3:UTP6:GUK1:RMT2:CWC21:RAD23:UTR4:POL5:PCM1:NOP16:NUG1:SMB1:TPA1:HOR2:IES5:KAP123:NSA2:SPT15:YER156C:PAB1:CCA1:…	5677:5678:790:30684:46695:30686:214:30687:30688:42555:502:508:5681:5682:5829:5685:5759:30690:30691:31499:228:31428:32806:8023:5622:5840:5842:5844:812:5774:5847:243:5634:5635:172:5637:176:177:5783:5786:5789:16281:31011:108:30869:5643:329:5934:8623:111:16363:119:32040:5724:408:16585:16586:5654:5655:5656:16514:120:775:30015:124:126:5730:5732:16591:16592:16593:5663:5736:347:5737:5665:5666:5739:5669:3…
43229	intracellular organelle	434 out of 582 genes, 74.6%	4021 out of 7288 background genes, 55.2%	1.93e-21	FUN30:PMT2:POP5:FUN12:CYC3:GCV3:ECM1:NUP60:ADE1:MCM2:NCL1:SKT5:RER2:MNN2:HMT1:RFC5:VID24:PHO88:GRS1:VMA2:SHE3:MCX1:ABD1:YBR242W:ENP1:ARO4:DUT1:REI1:PAF1:SSH1:GBP2:RRP7:APA1:FEN1:RRP43:YCR043C:YCR051W:THR4:PWP2:TAH1:NHP10:TSC13:SIR2:LHP1:TSR1:ASM4:RRP42:NUP84:YDL121C:COP1:RPC53:FAP7:DLD2:TRM8:ACK1:NHP2:NOP6:SHS1:PHO13:MRH1:YDR049W:LCB2:RRP8:RRP1:ARX1:TRM1:MTQ2:ENT5:RPA14:HOM2:YDR161W:TAF10:SEC7:RV…	5677:5960:5678:17119:790:30684:46695:30686:214:30687:30688:42555:144:502:506:508:31415:5681:5682:5829:5685:5758:5759:299:30478:30479:30690:30691:17059:220:221:31499:228:31207:5830:31428:5768:32806:300:8023:5622:30125:42645:30126:19898:5624:5625:5840:5842:5770:5843:5844:812:5774:5847:5777:45121:43529:243:30136:30137:5634:5635:172:5637:176:5850:177:5851:5783:5784:5786:9277:5788:5789:16281:31011:108…
43226	organelle	434 out of 582 genes, 74.6%	4022 out of 7288 background genes, 55.2%	2.07e-21	FUN30:PMT2:POP5:FUN12:CYC3:GCV3:ECM1:NUP60:ADE1:MCM2:NCL1:SKT5:RER2:MNN2:HMT1:RFC5:VID24:PHO88:GRS1:VMA2:SHE3:MCX1:ABD1:YBR242W:ENP1:ARO4:DUT1:REI1:PAF1:SSH1:GBP2:RRP7:APA1:FEN1:RRP43:YCR043C:YCR051W:THR4:PWP2:TAH1:NHP10:TSC13:SIR2:LHP1:TSR1:ASM4:RRP42:NUP84:YDL121C:COP1:RPC53:FAP7:DLD2:TRM8:ACK1:NHP2:NOP6:SHS1:PHO13:MRH1:YDR049W:LCB2:RRP8:RRP1:ARX1:TRM1:MTQ2:ENT5:RPA14:HOM2:YDR161W:TAF10:SEC7:RV…	5677:5960:5678:17119:790:30684:46695:30686:214:30687:30688:42555:144:502:506:508:31415:5681:5682:5829:5685:5758:5759:299:30478:30479:30690:30691:17059:220:221:31499:228:31207:5830:31428:5768:32806:300:8023:5622:30125:42645:30126:19898:5624:5625:5840:5842:5770:5843:5844:812:5774:5847:5777:45121:43529:243:30136:30137:5634:5635:172:5637:176:5850:177:5851:5783:5784:5786:9277:5788:5789:16281:31011:108…
5737	cytoplasm	401 out of 582 genes, 68.9%	3694 out of 7288 background genes, 50.7%	4.19e-18	CYS3:FUN30:PMT2:FUN12:RBG1:CYC3:GCV3:ADE1:MCM2:YBL055C:SKT5:PRS4:ILS1:MAP2:YBL104C:RER2:MNN2:KAP104:YBR025C:YBR028C:TRM7:VID24:PHO88:GRS1:VMA2:SHE3:SUP45:CNS1:TYR1:SMY2:MCX1:YBR242W:ENP1:ARO4:DUT1:REI1:SSH1:APM3:APA1:FEN1:RRP43:YCR043C:YCR051W:THR4:CTR86:PWP2:TAH1:TSC13:TSR1:RRP42:YDL121C:COP1:FAP7:NRP1:DLD2:ACK1:SHS1:YPD1:PHO13:MRH1:YDR049W:LCB2:ARX1:TRM1:MTQ2:GIR2:ENT5:HOM2:YDR161W:SEC7:RTN1:MN…	5960:17119:932:790:30684:30686:214:30687:30688:42555:144:502:506:31415:5681:5829:31417:5758:5759:299:30478:30479:30690:30691:17059:220:221:31207:5830:5768:300:30123:30125:42645:30126:19898:5624:5625:18444:5840:5842:5770:5843:5844:9337:5774:5777:45121:16272:43529:30136:30137:5634:5635:5637:176:5850:177:5851:5852:5783:5784:5786:9277:48471:5788:5789:16281:108:30869:324:5643:329:5933:5934:5935:5938:5…
43227	membrane-bound organelle	399 out of 582 genes, 68.6%	3674 out of 7288 background genes, 50.4%	6.23e-18	FUN30:PMT2:POP5:FUN12:CYC3:GCV3:ECM1:NUP60:ADE1:MCM2:NCL1:RER2:MNN2:HMT1:VID24:PHO88:GRS1:VMA2:MCX1:ABD1:YBR242W:ENP1:ARO4:DUT1:PAF1:SSH1:GBP2:RRP7:APA1:FEN1:RRP43:YCR043C:YCR051W:THR4:PWP2:TAH1:NHP10:TSC13:SIR2:LHP1:TSR1:ASM4:RRP42:NUP84:YDL121C:COP1:RPC53:FAP7:DLD2:TRM8:ACK1:NHP2:NOP6:PHO13:MRH1:YDR049W:LCB2:RRP8:RRP1:ARX1:TRM1:MTQ2:ENT5:RPA14:HOM2:YDR161W:TAF10:SEC7:RVB1:UME6:RTN1:MNN10:SET7:S…	5677:5960:5678:17119:790:30684:46695:30686:214:30687:30688:42555:502:506:508:5681:5682:5829:5685:5758:5759:299:30690:30691:17059:220:221:31499:228:31207:5830:31428:5768:32806:300:8023:5622:30125:42645:30126:19898:5624:5625:5840:5842:5770:5843:5844:812:5774:5847:5777:45121:43529:243:30136:30137:5634:5635:172:5637:176:177:5851:5783:5784:5786:9277:5788:5789:16281:31011:108:30869:324:5643:329:5934:86…
43231	intracellular membrane-bound organelle	399 out of 582 genes, 68.6%	3674 out of 7288 background genes, 50.4%	6.23e-18	FUN30:PMT2:POP5:FUN12:CYC3:GCV3:ECM1:NUP60:ADE1:MCM2:NCL1:RER2:MNN2:HMT1:VID24:PHO88:GRS1:VMA2:MCX1:ABD1:YBR242W:ENP1:ARO4:DUT1:PAF1:SSH1:GBP2:RRP7:APA1:FEN1:RRP43:YCR043C:YCR051W:THR4:PWP2:TAH1:NHP10:TSC13:SIR2:LHP1:TSR1:ASM4:RRP42:NUP84:YDL121C:COP1:RPC53:FAP7:DLD2:TRM8:ACK1:NHP2:NOP6:PHO13:MRH1:YDR049W:LCB2:RRP8:RRP1:ARX1:TRM1:MTQ2:ENT5:RPA14:HOM2:YDR161W:TAF10:SEC7:RVB1:UME6:RTN1:MNN10:SET7:S…	5677:5960:5678:17119:790:30684:46695:30686:214:30687:30688:42555:502:506:508:5681:5682:5829:5685:5758:5759:299:30690:30691:17059:220:221:31499:228:31207:5830:31428:5768:32806:300:8023:5622:30125:42645:30126:19898:5624:5625:5840:5842:5770:5843:5844:812:5774:5847:5777:45121:43529:243:30136:30137:5634:5635:172:5637:176:177:5851:5783:5784:5786:9277:5788:5789:16281:31011:108:30869:324:5643:329:5934:86…
31981	nuclear lumen	108 out of 582 genes, 18.6%	602 out of 7288 background genes, 8.3%	1.98e-14	POP5:ECM1:MCM2:ABD1:ENP1:PAF1:RRP7:PWP2:NHP10:SIR2:LHP1:TSR1:RPC53:NHP2:NOP6:RRP8:RRP1:ARX1:RPA14:TAF10:RVB1:UME6:UTP5:UTP6:POL5:NOP16:NUG1:NSA2:SPT15:CDC14:RSC8:RPB9:DBP3:NSA1:TAF6:ITC1:SLX9:NOP7:UTP8:NSR1:YGR251W:MED6:RPP1:SSF1:IPI1:DBP8:UTP9:RIX1:RPB3:NOT3:SDS3:YIL091C:SHQ1:STH1:MET18:NOP9:TRL1:UTP10:RPA34:RPA12:MRT4:TFA1:MPE1:LOS1:UTP30:NOC3:SIK1:RSA3:UTP13:SFH1:CDC73:UTP14:CAC2:UTP15:TAF9:BD…	5677:5678:46695:30686:30687:30688:42555:508:5829:30690:30691:31428:8023:5842:812:5847:5634:172:5637:31011:30869:8623:16363:119:32040:5724:16585:16586:5654:5655:5656:16514:120:775:30015:124:126:5730:5732:16591:16592:16593:5736:5737:5665:5739:5666:5669:783:5816:30532:5673
5730	nucleolus	70 out of 582 genes, 12.0%	303 out of 7288 background genes, 4.2%	2.16e-14	POP5:ECM1:ENP1:RRP7:PWP2:SIR2:LHP1:TSR1:NHP2:NOP6:RRP8:RRP1:RPA14:UTP5:UTP6:POL5:NOP16:NUG1:NSA2:SPT15:CDC14:DBP3:NSA1:SLX9:NOP7:UTP8:NSR1:YGR251W:RPP1:SSF1:DBP8:UTP9:YIL091C:NOP9:UTP10:RPA34:RPA12:MRT4:UTP30:NOC3:SIK1:RSA3:UTP13:UTP14:UTP15:NOP2:RPC19:NOP13:KRI1:DBP6:NOP12:BRX1:REX4:NOP8:UTP23:NOC2:RPB10:RPB8:MOD5:NOP58:RPA43:RPA190:NOP4:NOG1:NAN1:NOP53:NIP7:RRP9:RRP15:JIP5	5677:30686:30687:30688:5829:30690:30691:31428:5842:5634:172:30869:32040:5724:5654:5655:120:126:5730:5732:5736:5737:5665:5666:5739:5669:783:5816:30532
44428	nuclear part	153 out of 582 genes, 26.3%	1105 out of 7288 background genes, 15.2%	8.1e-11	POP5:ECM1:NUP60:MCM2:ABD1:ENP1:PAF1:RRP7:RRP43:PWP2:NHP10:SIR2:LHP1:TSR1:ASM4:RRP42:NUP84:RPC53:NHP2:NOP6:RRP8:RRP1:ARX1:TRM1:RPA14:TAF10:RVB1:UME6:CDC40:UTP5:UTP6:CWC21:RAD23:POL5:NOP16:NUG1:SMB1:KAP123:NSA2:SPT15:BRR2:NIC96:CDC14:RSC8:RPB9:DBP3:NUP145:NSA1:TAF6:PRP43:ITC1:NUP49:CSE1:SLX9:RRP46:NOP7:UTP8:MTR3:NSR1:SKI6:YGR251W:MED6:RPP1:SSF1:RRP4:IPI1:DBP8:UTP9:RIX1:SNL1:RPB3:NOT3:SDS3:YIL091C:S…	5677:5678:790:46695:30686:214:30687:30688:42555:502:508:5681:5682:5829:5685:30690:30691:31499:228:31428:32806:8023:5842:812:5847:243:5634:5635:172:5637:176:177:5783:5789:31011:108:30869:5643:8623:111:16363:119:32040:5724:408:16585:16586:5654:5655:5656:16514:120:775:30015:124:126:5730:5732:16591:16592:16593:5736:347:5737:5665:5739:5666:5669:783:5741:16020:5816:30530:46540:30532:5673
32991	macromolecular complex	198 out of 582 genes, 34.0%	1626 out of 7288 background genes, 22.3%	2.9e-09	POP5:FUN12:GCV3:NUP60:MCM2:RFC5:VMA2:SUP45:ABD1:ENP1:REI1:PAF1:SSH1:APM3:SRO9:RRP43:PWP2:NHP10:SIR2:ASM4:RRP42:NUP84:RPC53:NHP2:LCB2:ARX1:RPA14:TAF10:RVB1:UME6:MNN10:YDR266C:GPI8:CDC40:UTP5:UTP6:CWC21:GIM4:EDC3:ANP1:RAD23:RPL12A:SMB1:GET2:KAP123:NSA2:SPT15:PEA2:PAB1:BRR2:ECM32:NIC96:CDC14:RSC8:CKB1:TIF4632:RAD6:RPB9:NUP145:ARC1:TAF6:PRP43:ITC1:RPL9A:NUP49:GCN1:VMA7:UPF3:PAC10:SLX9:RRP46:COG2:UTP8…	5677:5960:5678:17119:932:790:30684:46695:30686:214:30687:30688:42555:502:506:508:31415:5681:5682:5829:31417:5685:30478:30690:30691:17059:220:221:31499:31207:5830:5834:31428:32806:300:8023:30123:5624:5625:18444:5840:5842:5843:5844:5845:9337:812:5847:16272:43529:243:5634:5635:172:5637:176:5850:177:5851:5852:5783:5784:5786:5789:16281:31011:108:30869:5643:329:8623:5937:5792:111:43614:119:32040:5724:4…
31974	membrane-enclosed lumen	119 out of 582 genes, 20.4%	818 out of 7288 background genes, 11.2%	3.11e-09	POP5:CYC3:ECM1:MCM2:MCX1:ABD1:ENP1:PAF1:RRP7:PWP2:NHP10:SIR2:LHP1:TSR1:RPC53:DLD2:NHP2:NOP6:RRP8:RRP1:ARX1:RPA14:TAF10:RVB1:UME6:UTP5:UTP6:POL5:NOP16:NUG1:NSA2:SPT15:CCA1:CDC14:RSC8:RPB9:DBP3:NSA1:TAF6:ITC1:SLX9:NOP7:UTP8:NSR1:YHB1:YGR251W:MED6:RPP1:SSF1:IPI1:DBP8:UTP9:RIX1:PPX1:RPB3:NOT3:SDS3:YIL091C:SHQ1:STH1:MET18:NOP9:TRL1:UTP10:RPA34:RPA12:MRT4:TFA1:MPE1:LOS1:UTP30:ISA1:NOC3:SIK1:RSA3:UTP13:…	5677:5678:46695:30686:30687:30688:42555:508:5829:5758:5759:30690:30691:31428:8023:42645:5842:812:5847:5634:172:5637:5788:31011:30869:8623:16363:119:32040:5724:16585:16586:5654:5655:5656:16514:120:775:30015:124:126:5730:5732:16591:16592:16593:5736:5737:5665:5666:5739:5669:5886:783:5743:5816:30532:5673
43233	organelle lumen	119 out of 582 genes, 20.4%	818 out of 7288 background genes, 11.2%	3.11e-09	POP5:CYC3:ECM1:MCM2:MCX1:ABD1:ENP1:PAF1:RRP7:PWP2:NHP10:SIR2:LHP1:TSR1:RPC53:DLD2:NHP2:NOP6:RRP8:RRP1:ARX1:RPA14:TAF10:RVB1:UME6:UTP5:UTP6:POL5:NOP16:NUG1:NSA2:SPT15:CCA1:CDC14:RSC8:RPB9:DBP3:NSA1:TAF6:ITC1:SLX9:NOP7:UTP8:NSR1:YHB1:YGR251W:MED6:RPP1:SSF1:IPI1:DBP8:UTP9:RIX1:PPX1:RPB3:NOT3:SDS3:YIL091C:SHQ1:STH1:MET18:NOP9:TRL1:UTP10:RPA34:RPA12:MRT4:TFA1:MPE1:LOS1:UTP30:ISA1:NOC3:SIK1:RSA3:UTP13:…	5677:5678:46695:30686:30687:30688:42555:508:5829:5758:5759:30690:30691:31428:8023:42645:5842:812:5847:5634:172:5637:5788:31011:30869:8623:16363:119:32040:5724:16585:16586:5654:5655:5656:16514:120:775:30015:124:126:5730:5732:16591:16592:16593:5736:5737:5665:5666:5739:5669:5886:783:5743:5816:30532:5673
44422	organelle part	246 out of 582 genes, 42.3%	2270 out of 7288 background genes, 31.1%	7.35e-07	POP5:FUN12:CYC3:ECM1:NUP60:MCM2:SKT5:RFC5:VMA2:SHE3:MCX1:ABD1:ENP1:REI1:PAF1:SSH1:RRP7:FEN1:RRP43:PWP2:NHP10:TSC13:SIR2:LHP1:TSR1:ASM4:RRP42:NUP84:COP1:RPC53:DLD2:NHP2:NOP6:SHS1:LCB2:RRP8:RRP1:ARX1:TRM1:ENT5:RPA14:TAF10:SEC7:RVB1:UME6:RTN1:MNN10:GPI11:GPI8:YDR352W:CDC40:UTP5:STE14:UTP6:CWC21:SPF1:ANP1:RAD23:UTR2:RPL12A:POL5:NOP16:NUG1:SMB1:VTC1:GET2:KAP123:YER113C:GLO3:NSA2:SPT15:PEA2:CCA1:BRR2:N…	5677:5678:17119:790:46695:30686:214:30687:30688:42555:144:502:506:508:5681:5682:5829:5685:5758:5759:30478:30479:30690:30691:17059:220:221:31499:228:31207:31428:5768:32806:300:8023:30125:19898:42645:30126:5624:5625:5842:5770:5843:812:5774:5847:43529:243:30137:5634:5635:172:5637:176:177:5783:5784:9277:5788:5789:31011:108:30869:324:5643:329:8623:5935:5792:5793:5794:5798:111:16363:119:31310:32040:572…
44446	intracellular organelle part	246 out of 582 genes, 42.3%	2270 out of 7288 background genes, 31.1%	7.35e-07	POP5:FUN12:CYC3:ECM1:NUP60:MCM2:SKT5:RFC5:VMA2:SHE3:MCX1:ABD1:ENP1:REI1:PAF1:SSH1:RRP7:FEN1:RRP43:PWP2:NHP10:TSC13:SIR2:LHP1:TSR1:ASM4:RRP42:NUP84:COP1:RPC53:DLD2:NHP2:NOP6:SHS1:LCB2:RRP8:RRP1:ARX1:TRM1:ENT5:RPA14:TAF10:SEC7:RVB1:UME6:RTN1:MNN10:GPI11:GPI8:YDR352W:CDC40:UTP5:STE14:UTP6:CWC21:SPF1:ANP1:RAD23:UTR2:RPL12A:POL5:NOP16:NUG1:SMB1:VTC1:GET2:KAP123:YER113C:GLO3:NSA2:SPT15:PEA2:CCA1:BRR2:N…	5677:5678:17119:790:46695:30686:214:30687:30688:42555:144:502:506:508:5681:5682:5829:5685:5758:5759:30478:30479:30690:30691:17059:220:221:31499:228:31207:31428:5768:32806:300:8023:30125:19898:42645:30126:5624:5625:5842:5770:5843:812:5774:5847:43529:243:30137:5634:5635:172:5637:176:177:5783:5784:9277:5788:5789:31011:108:30869:324:5643:329:8623:5935:5792:5793:5794:5798:111:16363:119:31310:32040:572…
30684	preribosome	10 out of 582 genes, 1.7%	15 out of 7288 background genes, 0.2%	6.29e-06	ENP1:PWP2:NSA2:SLX9:NOC3:RSA3:DBP6:NOB1:NOC2:NOG1	30684:30686:30687:30688:30690:30691:5634:5730:5732:5737:5739
177	cytoplasmic exosome (RNase complex)	8 out of 582 genes, 1.4%	10 out of 7288 background genes, 0.1%	1.9e-05	RRP43:RRP42:RRP46:MTR3:SKI6:RRP4:CSL4:RRP40	176:177
31965	nuclear membrane	19 out of 582 genes, 3.3%	61 out of 7288 background genes, 0.8%	3.94e-05	NUP60:ASM4:NUP84:TRM1:KAP123:NIC96:NUP145:NUP49:NUP82:TRL1:NUP85:NUP100:NUP133:NUP2:NUP188:NUP53:NUP1:CEX1:SEN54	790:214:5634:5635:5637:5643:5654:5737:5739:5741
44453	nuclear membrane part	19 out of 582 genes, 3.3%	61 out of 7288 background genes, 0.8%	3.94e-05	NUP60:ASM4:NUP84:TRM1:KAP123:NIC96:NUP145:NUP49:NUP82:TRL1:NUP85:NUP100:NUP133:NUP2:NUP188:NUP53:NUP1:CEX1:SEN54	790:214:5634:5635:5637:5643:5654:5737:5739:5741
30685	nucleolar preribosome	9 out of 582 genes, 1.5%	14 out of 7288 background genes, 0.2%	5.34e-05	ENP1:PWP2:NSA2:SLX9:NOC3:RSA3:DBP6:NOC2:NOG1	30686:30687:30688:30690:30691:5634:5730:5732:5737:5739
136	alpha-1,6-mannosyltransferase complex	6 out of 582 genes, 1.0%	6 out of 7288 background genes, 0.1%	7.82e-05	MNN10:ANP1:MNN11:HOC1:VAN1:MNN9	5801:136:137:16020
31501	mannosyltransferase complex	6 out of 582 genes, 1.0%	6 out of 7288 background genes, 0.1%	7.82e-05	MNN10:ANP1:MNN11:HOC1:VAN1:MNN9	5801:136:137:16020
44452	nucleolar part	34 out of 582 genes, 5.8%	174 out of 7288 background genes, 2.4%	0.00021	POP5:ENP1:PWP2:NHP2:RPA14:UTP5:UTP6:NSA2:SPT15:SLX9:UTP8:RPP1:UTP9:UTP10:RPA34:RPA12:NOC3:SIK1:RSA3:UTP13:UTP14:UTP15:RPC19:DBP6:UTP23:NOC2:RPB10:RPB8:NOP58:RPA43:RPA190:NOG1:NAN1:RRP9	30686:30687:30688:30690:30691:31428:5634:172:30869:32040:5655:120:126:5730:5732:5736:5737:5665:5666:5739:5669:30532
46930	pore complex	16 out of 582 genes, 2.7%	51 out of 7288 background genes, 0.7%	0.00035	NUP60:ASM4:NUP84:KAP123:NIC96:NUP145:NUP49:NUP82:NUP85:NUP100:NUP133:NUP2:NUP188:NUP53:NUP1:CEX1	790:5634:5635:5643:5737:5739
5643	nuclear pore	16 out of 582 genes, 2.7%	51 out of 7288 background genes, 0.7%	0.00035	NUP60:ASM4:NUP84:KAP123:NIC96:NUP145:NUP49:NUP82:NUP85:NUP100:NUP133:NUP2:NUP188:NUP53:NUP1:CEX1	790:5634:5635:5643:5737:5739
43234	protein complex	147 out of 582 genes, 25.3%	1291 out of 7288 background genes, 17.7%	0.00037	FUN12:GCV3:NUP60:MCM2:RFC5:VMA2:SUP45:ABD1:REI1:PAF1:SSH1:APM3:RRP43:NHP10:SIR2:ASM4:RRP42:NUP84:RPC53:LCB2:ARX1:RPA14:TAF10:RVB1:UME6:MNN10:GPI8:GIM4:EDC3:ANP1:RAD23:RPL12A:GET2:KAP123:SPT15:PEA2:NIC96:CDC14:RSC8:CKB1:TIF4632:RAD6:RPB9:NUP145:ARC1:TAF6:ITC1:RPL9A:NUP49:VMA7:PAC10:RRP46:COG2:MTR3:SKI6:BUD32:MES1:RPL8A:ARD1:PPA1:MED6:RRP4:NMD3:RPB3:CKA1:NOT3:SDS3:STH1:NUP82:TIF2:RPA34:PFD1:MNN11:S…	5677:5960:5678:17119:932:790:46695:214:42555:502:506:508:31415:5829:31417:5685:30478:30690:30691:17059:220:221:31499:31207:5830:5834:32806:300:8023:30123:5624:5625:18444:5840:5842:5843:5845:9337:812:5847:16272:43529:243:5634:5635:5637:176:5850:177:5851:5852:5783:5784:5789:16281:31011:108:30869:5643:329:8623:5937:5792:111:43614:119:5724:408:16585:16586:5654:32045:5656:16514:42175:120:775:30015:124…
43228	non-membrane-bound organelle	122 out of 582 genes, 21.0%	1025 out of 7288 background genes, 14.1%	0.00042	POP5:FUN12:ECM1:MCM2:SKT5:RFC5:SHE3:ENP1:REI1:RRP7:PWP2:SIR2:LHP1:TSR1:NHP2:NOP6:SHS1:RRP8:RRP1:ARX1:RPA14:YDR266C:UTP5:UTP6:UTR2:RPL12A:POL5:NOP16:NUG1:NSA2:SPT15:PEA2:PAB1:CDC14:TIF4632:DBP3:NSA1:RPL9A:GCN1:SLX9:NOP7:UTP8:NSR1:YGR251W:ZUO1:OTU2:RPL8A:ARD1:RPP1:SSF1:CDC12:DBP8:NMD3:UTP9:YIL091C:SQT1:NOP9:UTP10:ALB1:TIF2:RPA34:SUI2:TMA22:RPA12:MRT4:KAE1:UTP30:ENT4:NOC3:SIK1:RSA3:UTP13:YEF3:NUP2:R…	5677:5678:790:30686:30687:30688:42555:144:31415:5829:30478:30479:30690:30691:228:5830:31428:5840:5842:5843:5634:172:5850:5783:9277:16281:30869:5643:5935:43614:32040:5724:408:5654:5655:5656:5940:120:775:126:5730:5732:5736:5663:5737:5665:5666:5739:5669:5884:783:131:133:5816:30532
43232	intracellular non-membrane-bound organelle	122 out of 582 genes, 21.0%	1025 out of 7288 background genes, 14.1%	0.00042	POP5:FUN12:ECM1:MCM2:SKT5:RFC5:SHE3:ENP1:REI1:RRP7:PWP2:SIR2:LHP1:TSR1:NHP2:NOP6:SHS1:RRP8:RRP1:ARX1:RPA14:YDR266C:UTP5:UTP6:UTR2:RPL12A:POL5:NOP16:NUG1:NSA2:SPT15:PEA2:PAB1:CDC14:TIF4632:DBP3:NSA1:RPL9A:GCN1:SLX9:NOP7:UTP8:NSR1:YGR251W:ZUO1:OTU2:RPL8A:ARD1:RPP1:SSF1:CDC12:DBP8:NMD3:UTP9:YIL091C:SQT1:NOP9:UTP10:ALB1:TIF2:RPA34:SUI2:TMA22:RPA12:MRT4:KAE1:UTP30:ENT4:NOC3:SIK1:RSA3:UTP13:YEF3:NUP2:R…	5677:5678:790:30686:30687:30688:42555:144:31415:5829:30478:30479:30690:30691:228:5830:31428:5840:5842:5843:5634:172:5850:5783:9277:16281:30869:5643:5935:43614:32040:5724:408:5654:5655:5656:5940:120:775:126:5730:5732:5736:5663:5737:5665:5666:5739:5669:5884:783:131:133:5816:30532
176	nuclear exosome (RNase complex)	8 out of 582 genes, 1.4%	13 out of 7288 background genes, 0.2%	0.00043	RRP43:RRP42:RRP46:MTR3:SKI6:RRP4:CSL4:RRP40	176:177
30687	nucleolar preribosome, large subunit precursor	6 out of 582 genes, 1.0%	7 out of 7288 background genes, 0.1%	0.00051	NSA2:NOC3:RSA3:DBP6:NOC2:NOG1	30687:30690:30691:5634:5730:5739
137	Golgi cis cisterna	7 out of 582 genes, 1.2%	10 out of 7288 background genes, 0.1%	0.00059	MNN10:ANP1:MNN11:HOC1:VAN1:MNN9:KRE6	5801:136:137:16020:16021
178	exosome (RNase complex)	8 out of 582 genes, 1.4%	14 out of 7288 background genes, 0.2%	0.00095	RRP43:RRP42:RRP46:MTR3:SKI6:RRP4:CSL4:RRP40	176:177
5736	DNA-directed RNA polymerase I complex	8 out of 582 genes, 1.4%	14 out of 7288 background genes, 0.2%	0.00095	RPA14:RPA34:RPA12:RPC19:RPB10:RPB8:RPA43:RPA190	5634:5730:5736:5665:5666
42598	vesicular fraction	9 out of 582 genes, 1.5%	18 out of 7288 background genes, 0.2%	0.00096	LCB2:CBR1:SFH5:CSR1:LCB1:YDJ1:CYB5:PDR16:PIS1	5829:17059:5624:5783:48471:5789:5792:5737:5739:5811:5741
5792	microsome	9 out of 582 genes, 1.5%	18 out of 7288 background genes, 0.2%	0.00096	LCB2:CBR1:SFH5:CSR1:LCB1:YDJ1:CYB5:PDR16:PIS1	5829:17059:5624:5783:48471:5789:5792:5737:5739:5811:5741
5654	nucleoplasm	49 out of 582 genes, 8.4%	326 out of 7288 background genes, 4.5%	0.00285	ECM1:MCM2:ABD1:PAF1:NHP10:SIR2:LHP1:RPC53:ARX1:TAF10:RVB1:UME6:SPT15:CDC14:RSC8:RPB9:TAF6:ITC1:MED6:IPI1:RIX1:RPB3:NOT3:SDS3:SHQ1:STH1:MET18:TRL1:TFA1:MPE1:NOC3:SFH1:CDC73:CAC2:TAF9:BDP1:RPC19:NOP13:POP2:CTR9:SYC1:NOC2:RPB10:RPB8:SGF11:NAN1:CTI6:ARP7:SUA7	5677:5678:46695:42555:508:30690:30691:8023:5842:812:5847:5634:5637:31011:30869:8623:119:5724:16585:16586:5654:5656:16514:120:775:30015:124:126:5730:5732:16591:16592:16593:5736:5737:5665:5739:5666:5669:783:5816:5673
30880	RNA polymerase complex	11 out of 582 genes, 1.9%	31 out of 7288 background genes, 0.4%	0.00456	RPC53:RPA14:RPB9:RPB3:RPA34:RPA12:RPC19:RPB10:RPB8:RPA43:RPA190	5634:5730:5736:5665:5666
428	DNA-directed RNA polymerase complex	11 out of 582 genes, 1.9%	31 out of 7288 background genes, 0.4%	0.00456	RPC53:RPA14:RPB9:RPB3:RPA34:RPA12:RPC19:RPB10:RPB8:RPA43:RPA190	5634:5730:5736:5665:5666
55029	nuclear DNA-directed RNA polymerase complex	11 out of 582 genes, 1.9%	31 out of 7288 background genes, 0.4%	0.00456	RPC53:RPA14:RPB9:RPB3:RPA34:RPA12:RPC19:RPB10:RPB8:RPA43:RPA190	5634:5730:5736:5665:5666
16272	prefoldin complex	5 out of 582 genes, 0.9%	6 out of 7288 background genes, 0.1%	0.00553	GIM4:PAC10:PFD1:YKE2:GIM3	16272:5737
Cluster 2
Genes
YGR037C	ACB1	YGR037C
YCR011C	ADP1	YCR011C
YBR132C	AGP2	YBR132C
YMR092C	AIP1	YMR092C
YPL061W	ALD6	YPL061W
YOR374W	ALD4	YOR374W
YOR002W	ALG6	YOR002W
YPR180W	AOS1	YPR180W
YKL135C	APL2	YKL135C
YIL062C	ARC15	YIL062C
YLR370C	ARC18	YLR370C
YKL013C	ARC19	YKL013C
YNR035C	ARC35	YNR035C
YOL058W	ARG1	YOL058W
YHR018C	ARG4	YHR018C
YHR137W	ARO9	YHR137W
YOR377W	ATF1	YOR377W
YPL271W	ATP15	YPL271W
YPL078C	ATP4	YPL078C
YNL259C	ATX1	YNL259C
YNR007C	ATG3	YNR007C
YJR148W	BAT2	YJR148W
YDL070W	BDF2	YDL070W
YER177W	BMH1	YER177W
YDR099W	BMH2	YDR099W
YDR252W	BTT1	YDR252W
YJR092W	BUD4	YJR092W
YER159C	BUR6	YER159C
YKL007W	CAP1	YKL007W
YIL034C	CAP2	YIL034C
YJR060W	CBF1	YJR060W
YDR270W	CCC2	YDR270W
YKR066C	CCP1	YKR066C
YDR054C	CDC34	YDR054C
YDR168W	CDC37	YDR168W
YCR093W	CDC39	YCR093W
YCR094W	CDC50	YCR094W
YGL190C	CDC55	YGL190C
YGL206C	CHC1	YGL206C
YGR157W	CHO2	YGR157W
YGR167W	CLC1	YGR167W
YBR109C	CMD1	YBR109C
YBL045C	COR1	YBL045C
YOR316C	COT1	YOR316C
YER141W	COX15	YER141W
YMR256C	COX7	YMR256C
YLR395C	COX8	YLR395C
YNL027W	CRZ1	YNL027W
YBR036C	CSG2	YBR036C
YKL096W	CWP1	YKL096W
YMR032W	HOF1	YMR032W
YER143W	DDI1	YER143W
YER088C	DOT6	YER088C
YDR294C	DPL1	YDR294C
YMR276W	DSK2	YMR276W
YLR348C	DIC1	YLR348C
YBL101C	ECM21	YBL101C
YHL030W	ECM29	YHL030W
YML048W	GSF2	YML048W
YNL327W	EGT2	YNL327W
YPL028W	ERG10	YPL028W
YHR190W	ERG9	YHR190W
YML012W	ERV25	YML012W
YJL085W	EXO70	YJL085W
YPL231W	FAS2	YPL231W
YBR222C	PCS60	YBR222C
YKL060C	FBA1	YKL060C
YCR028C	FEN2	YCR028C
YBR207W	FTH1	YBR207W
YDL215C	GDH2	YDL215C
YER136W	GDI1	YER136W
YDR505C	PSP1	YDR505C
YMR311C	GLC8	YMR311C
YDL207W	GLE1	YDL207W
YDR272W	GLO2	YDR272W
YER020W	GPA2	YER020W
YPR160W	GPH1	YPR160W
YHR104W	GRE3	YHR104W
YOR185C	GSP2	YOR185C
YFR015C	GSY1	YFR015C
YGL181W	GTS1	YGL181W
YJL044C	GYP6	YJL044C
YOR176W	HEM15	YOR176W
YML075C	HMG1	YML075C
YLR450W	HMG2	YLR450W
YML126C	ERG13	YML126C
YGL194C	HOS2	YGL194C
YMR027W	non	YMR027W
YMR186W	HSC82	YMR186W
YBR272C	HSM3	YBR272C
YFL014W	HSP12	YFL014W
YBR072W	HSP26	YBR072W
YDR258C	HSP78	YDR258C
YPL015C	HST2	YPL015C
YKL189W	HYM1	YKL189W
YIR037W	HYR1	YIR037W
YCL009C	ILV6	YCL009C
YDR497C	ITR1	YDR497C
YKL032C	IXR1	YKL032C
YJR091C	JSN1	YJR091C
YCL055W	KAR4	YCL055W
YOR099W	KTR1	YOR099W
YBR199W	KTR4	YBR199W
YKL103C	LAP4	YKL103C
YNL071W	LAT1	YNL071W
YNL104C	LEU4	YNL104C
YGR244C	LSC2	YGR244C
YMR043W	MCM1	YMR043W
YNL173C	MDG1	YNL173C
YOL126C	MDH2	YOL126C
YDL078C	MDH3	YDL078C
YNL328C	MDJ2	YNL328C
YDL005C	MED2	YDL005C
YBR193C	MED8	YBR193C
YJL042W	MHP1	YJL042W
YOL088C	MPD2	YOL088C
YKL142W	MRP8	YKL142W
YER042W	MXR1	YER042W
YKL129C	MYO3	YKL129C
YPR149W	NCE102	YPR149W
YBR212W	NGR1	YBR212W
YPR052C	NHP6A	YPR052C
YDR456W	NHX1	YDR456W
YBR170C	NPL4	YBR170C
YDR001C	NTH1	YDR001C
YGL055W	OLE1	YGL055W
YHL020C	OPI1	YHL020C
YJR073C	OPI3	YJR073C
YKL025C	PAN3	YKL025C
YKR002W	PAP1	YKR002W
YNL015W	PBI2	YNL015W
YCL052C	PBN1	YCL052C
YER059W	PCL6	YER059W
YER178W	PDA1	YER178W
YOL147C	PEX11	YOL147C
YGL153W	PEX14	YGL153W
YDR329C	PEX3	YDR329C
YBR196C	PGI1	YBR196C
YCR012W	PGK1	YCR012W
YGR132C	PHB1	YGR132C
YDR481C	PHO8	YDR481C
YJL117W	PHO86	YJL117W
YML069W	POB3	YML069W
YNL055C	POR1	YNL055C
YEL060C	PRB1	YEL060C
YCL057W	PRD1	YCL057W
YOR362C	PRE10	YOR362C
YFR050C	PRE4	YFR050C
YMR314W	PRE5	YMR314W
YOL038W	PRE6	YOL038W
YML092C	PRE8	YML092C
YER023W	PRO3	YER023W
YNL118C	DCP2	YNL118C
YBL056W	PTC3	YBL056W
YJR059W	PTK2	YJR059W
YOR157C	PUP1	YOR157C
YGR253C	PUP2	YGR253C
YOR347C	PYK2	YOR347C
YJL166W	QCR8	YJL166W
YER095W	RAD51	YER095W
YML032C	RAD52	YML032C
YNL098C	RAS2	YNL098C
YBL033C	RIB1	YBL033C
YOL143C	RIB4	YOL143C
YMR061W	RNA14	YMR061W
YGR180C	RNR4	YGR180C
YJL140W	RPB4	YJL140W
YHR027C	RPN1	YHR027C
YHR200W	RPN10	YHR200W
YFR004W	RPN11	YFR004W
YFR052W	RPN12	YFR052W
YIL075C	RPN2	YIL075C
YDL147W	RPN5	YDL147W
YPR108W	RPN7	YPR108W
YOR261C	RPN8	YOR261C
YDR427W	RPN9	YDR427W
YOR259C	RPT4	YOR259C
YGL048C	RPT6	YGL048C
YIL153W	RRD1	YIL153W
YML049C	RSE1	YML049C
YGL252C	RTG2	YGL252C
YOR014W	RTS1	YOR014W
YDR388W	RVS167	YDR388W
YGL229C	SAP4	YGL229C
YKL117W	SBA1	YKL117W
YHL034C	SBP1	YHL034C
YCR069W	CPR4	YCR069W
YPR129W	SCD6	YPR129W
YGL011C	SCL1	YGL011C
YGL126W	SCS3	YGL126W
YDR178W	SDH4	YDR178W
YKL193C	SDS22	YKL193C
YGL233W	SEC15	YGL233W
YNL272C	SEC2	YNL272C
YLR378C	SEC61	YLR378C
YDR077W	SED1	YDR077W
YBL102W	SFT2	YBL102W
YBR263W	SHM1	YBR263W
YBL058W	SHP1	YBL058W
YER068W	MOT2	YER068W
YNL007C	SIS1	YNL007C
YDR328C	SKP1	YDR328C
YBL007C	SLA1	YBL007C
YPR182W	SMX3	YPR182W
YDR477W	SNF1	YDR477W
YNR034W	SOL1	YNR034W
YHR136C	SPL2	YHR136C
YGR116W	SPT6	YGR116W
YIL033C	BCY1	YIL033C
YPL243W	SRP68	YPL243W
YAL005C	SSA1	YAL005C
YER103W	SSA4	YER103W
YDR293C	SSD1	YDR293C
YBR169C	SSE2	YBR169C
YLR250W	SSP120	YLR250W
YLR452C	SST2	YLR452C
YDR169C	STB3	YDR169C
YFL026W	STE2	YFL026W
YJR117W	STE24	YJR117W
YOR027W	STI1	YOR027W
YNL066W	SUN4	YNL066W
YML052W	SUR7	YML052W
YJL004C	SYS1	YJL004C
YOR244W	ESA1	YOR244W
YPR080W	TEF1	YPR080W
YKL058W	TOA2	YKL058W
YAL016W	TPD3	YAL016W
YJL164C	TPK1	YJL164C
YPL203W	TPK2	YPL203W
YBR126C	TPS1	YBR126C
YMR261C	TPS3	YMR261C
YDR354W	TRP4	YDR354W
YGR209C	TRX2	YGR209C
YGR080W	TWF1	YGR080W
YKL210W	UBA1	YKL210W
YER100W	UBC6	YER100W
YOR124C	UBP2	YOR124C
YGR048W	UFD1	YGR048W
YJR103W	URA8	YJR103W
YER112W	LSM4	YER112W
YJR049C	UTR1	YJR049C
YKR001C	VPS1	YKR001C
YNR006W	VPS27	YNR006W
YLR396C	VPS33	YLR396C
YJL154C	VPS35	YJL154C
YAL032C	PRP45	YAL032C
YAL060W	BDH1	YAL060W
YAL061W	non	YAL061W
YBL064C	PRX1	YBL064C
YBR016W	non	YBR016W
YBR052C	RFS1	YBR052C
YBR086C	IST2	YBR086C
YBR101C	FES1	YBR101C
YBR102C	EXO84	YBR102C
YBR149W	ARA1	YBR149W
YBR151W	APD1	YBR151W
YBR177C	EHT1	YBR177C
YBR214W	SDS24	YBR214W
YBR241C	non	YBR241C
YCL035C	GRX1	YCL035C
YCR004C	YCP4	YCR004C
YCR017C	CWH43	YCR017C
YCR030C	SYP1	YCR030C
YDL046W	NPC2	YDL046W
YDL053C	PBP4	YDL053C
YDL072C	YET3	YDL072C
YDL099W	BUG1	YDL099W
YDL100C	GET3	YDL100C
YDL110C	TMA17	YDL110C
YDL123W	SNA4	YDL123W
YDL144C	non	YDL144C
YDL161W	ENT1	YDL161W
YDL173W	non	YDL173W
YDL193W	NUS1	YDL193W
YDR003W	RCR2	YDR003W
YDR032C	PST2	YDR032C
YDR036C	EHD3	YDR036C
YDR055W	PST1	YDR055W
YDR063W	non	YDR063W
YDR084C	TVP23	YDR084C
YDR100W	TVP15	YDR100W
YDR111C	ALT2	YDR111C
YDR202C	RAV2	YDR202C
YDR219C	MFB1	YDR219C
YDR229W	IVY1	YDR229W
YDR239C	non	YDR239C
YDR358W	GGA1	YDR358W
YDR384C	ATO3	YDR384C
YDR476C	non	YDR476C
YDR486C	VPS60	YDR486C
YEL047C	non	YEL047C
YER004W	FMP52	YER004W
YER030W	CHZ1	YER030W
YER034W	non	YER034W
YER035W	EDC2	YER035W
YER044C	ERG28	YER044C
YER067W	non	YER067W
YER080W	FMP29	YER080W
YKL065C	YET1	YKL065C
YFR006W	non	YFR006W
YFR044C	DUG1	YFR044C
YFR047C	BNA6	YFR047C
YGL004C	RPN14	YGL004C
YGL010W	non	YGL010W
YGL037C	PNC1	YGL037C
YGL056C	SDS23	YGL056C
YGL080W	FMP37	YGL080W
YGL082W	non	YGL082W
YGL101W	non	YGL101W
YGL164C	YRB30	YGL164C
YGR031W	non	YGR031W
YGR111W	non	YGR111W
YGR205W	non	YGR205W
YGR206W	MVB12	YGR206W
YGR232W	NAS6	YGR232W
YGR235C	non	YGR235C
YGR243W	FMP43	YGR243W
YGR250C	non	YGR250C
YGR266W	non	YGR266W
YGR284C	ERV29	YGR284C
YHL021C	FMP12	YHL021C
YHR087W	non	YHR087W
YHR110W	ERP5	YHR110W
YHR114W	BZZ1	YHR114W
YHR146W	CRP1	YHR146W
YIL041W	GVP36	YIL041W
YIL105C	SLM1	YIL105C
YIL124W	AYR1	YIL124W
YIL158W	non	YIL158W
YMR152W	YIM1	YMR152W
YIR003W	non	YIR003W
YJL029C	VPS53	YJL029C
YJL082W	IML2	YJL082W
YJL123C	non	YJL123C
YJR044C	VPS55	YJR044C
YJR083C	ACF4	YJR083C
YKL094W	YJU3	YKL094W
YKL023W	non	YKL023W
YKL040C	NFU1	YKL040C
YKL061W	non	YKL061W
YKL116C	PRR1	YKL116C
YKL146W	AVT3	YKL146W
YKL204W	EAP1	YKL204W
YKL206C	ADD66	YKL206C
YKL215C	non	YKL215C
YKR003W	OSH6	YKR003W
YKR018C	non	YKR018C
YKR067W	GPT2	YKR067W
YKR074W	non	YKR074W
YLL023C	non	YLL023C
YLL032C	non	YLL032C
YLR201C	COQ9	YLR201C
YLR219W	MSC3	YLR219W
YLR324W	PEX30	YLR324W
YLR350W	ORM2	YLR350W
YLR421C	RPN13	YLR421C
YPR024W	YME1	YPR024W
YML101C	CUE4	YML101C
YML117W	NAB6	YML117W
YMR009W	ADI1	YMR009W
YMR086W	non	YMR086W
YMR099C	non	YMR099C
YMR112C	MED11	YMR112C
YMR148W	non	YMR148W
YMR178W	non	YMR178W
YMR184W	ADD37	YMR184W
YMR237W	BCH1	YMR237W
YMR313C	TGL3	YMR313C
YMR315W	non	YMR315W
YNL051W	COG5	YNL051W
YNL058C	non	YNL058C
YNL078W	NIS1	YNL078W
YNL091W	NST1	YNL091W
YNL100W	non	YNL100W
YNL155W	non	YNL155W
YNL156C	NSG2	YNL156C
YNL157W	IGO1	YNL157W
YNL180C	RHO5	YNL180C
YNL212W	VID27	YNL212W
YNL215W	IES2	YNL215W
YNL275W	BOR1	YNL275W
YNL288W	CAF40	YNL288W
YOL027C	MDM38	YOL027C
YOL060C	MAM3	YOL060C
YOL129W	VPS68	YOL129W
YOR118W	non	YOR118W
YOR163W	DDP1	YOR163W
YOR164C	non	YOR164C
YOR215C	non	YOR215C
YOR220W	WSP1	YOR220W
YOR273C	TPO4	YOR273C
YOR285W	non	YOR285W
YOR322C	LDB19	YOR322C
YOR356W	non	YOR356W
YPL107W	non	YPL107W
YPL135W	ISU1	YPL135W
YPL184C	MRN1	YPL184C
YPL260W	non	YPL260W
YPR008W	HAA1	YPR008W
YPR091C	non	YPR091C
YDR368W	YPR1	YDR368W
YPR128C	ANT1	YPR128C
GO Enrichments
Process
GOID	GO_term	Cluster frequency	Background frequency	P-value	Gene(s) annotated to the term	Directly Annotated GOID List
6508	proteolysis	38 out of 402 genes, 9.5%	173 out of 7288 background genes, 2.4%	7.32e-11	SHP1:NPL4:PBN1:PRD1:RPN5:CDC34:MFB1:SKP1:GGA1:RPN9:UBC6:DDI1:RPN11:PRE4:RPN12:RPN14:SCL1:RPT6:UFD1:PHB1:NAS6:PUP2:RPN1:RPN10:RPN2:ADD66:RPN13:PRE8:ADD37:DSK2:PRE5:PBI2:PRE6:PUP1:RPT4:RPN8:PRE10:RPN7	42787:910:7005:45116:16192:6895:6896:6511:6513:1302:16485:30162:15031:6461:30433:31146:51865:30437:723:6397:42144:6950:82:45861:43161:7103:86:5977:43254:7035:43328:51382:209:6506:6508:7096:6457
44257	cellular protein catabolic process	35 out of 402 genes, 8.7%	156 out of 7288 background genes, 2.1%	3.82e-10	SHP1:NPL4:PBN1:RPN5:CDC34:MFB1:SKP1:GGA1:RPN9:PRB1:UBC6:DDI1:RPN11:PRE4:RPN12:RPN14:SCL1:RPT6:UFD1:PUP2:RPN1:RPN10:RPN2:LAP4:ADD66:PRE8:ADD37:DSK2:PRE5:PRE6:PUP1:RPT4:RPN8:PRE10:RPN7	42787:910:7005:45116:16192:6895:6896:6511:6513:16485:15031:6461:31146:30433:30435:51865:6397:723:30437:6950:9267:82:43161:7103:86:5977:43254:43328:7035:51382:7039:209:6506:6508:7096
44265	cellular macromolecule catabolic process	50 out of 402 genes, 12.4%	303 out of 7288 background genes, 4.2%	1.05e-09	SHP1:NPL4:PGI1:PBN1:PGK1:CDC39:RPN5:NTH1:CDC34:MFB1:SKP1:GGA1:YPR1:RPN9:PRB1:EDC2:PCL6:MOT2:UBC6:LSM4:DDI1:RPN11:PRE4:RPN12:RPN14:SCL1:RPT6:UFD1:PUP2:RPN1:GRE3:RPN10:RPN2:RPB4:JSN1:FBA1:LAP4:ADD66:PRE8:ADD37:DSK2:PRE5:DCP2:PRE6:PUP1:RPT4:RPN8:PRE10:RPN7:GPH1	42787:910:31087:288:19568:289:5980:74:5981:7005:398:45116:16192:6402:6895:122:6896:6406:6511:6513:16485:15031:42843:6461:6357:31146:30433:290:30435:51865:6397:723:30437:9267:6950:82:43161:7103:747:86:5993:5977:749:5979:43254:43328:7035:7124:51382:7039:209:6506:6094:6508:6096:16567:6098:6366:7096:6368
30163	protein catabolic process	36 out of 402 genes, 9.0%	170 out of 7288 background genes, 2.3%	1.1e-09	SHP1:NPL4:PBN1:RPN5:CDC34:MFB1:SKP1:GGA1:RPN9:PRB1:UBC6:DDI1:RPN11:PRE4:RPN12:RPN14:SCL1:RPT6:UFD1:PUP2:ECM29:RPN1:RPN10:RPN2:LAP4:ADD66:PRE8:ADD37:DSK2:PRE5:PRE6:PUP1:RPT4:RPN8:PRE10:RPN7	42787:910:7005:45116:16192:6895:6896:6511:6513:16485:15031:6461:30163:31146:30433:30435:51865:6397:723:30437:6950:9267:82:43161:7103:86:5977:43254:43328:7035:51382:7039:209:6506:6508:7096
19941	modification-dependent protein catabolic process	33 out of 402 genes, 8.2%	145 out of 7288 background genes, 2.0%	1.2e-09	SHP1:NPL4:PBN1:RPN5:CDC34:MFB1:SKP1:GGA1:RPN9:UBC6:DDI1:RPN11:PRE4:RPN12:RPN14:SCL1:RPT6:UFD1:PUP2:RPN1:RPN10:RPN2:ADD66:PRE8:ADD37:DSK2:PRE5:PRE6:PUP1:RPT4:RPN8:PRE10:RPN7	42787:910:7005:45116:16192:6895:6896:6511:6513:16485:15031:6461:31146:30433:51865:6397:723:30437:6950:82:43161:7103:86:5977:43254:43328:7035:51382:209:6506:6508:7096
6511	ubiquitin-dependent protein catabolic process	33 out of 402 genes, 8.2%	145 out of 7288 background genes, 2.0%	1.2e-09	SHP1:NPL4:PBN1:RPN5:CDC34:MFB1:SKP1:GGA1:RPN9:UBC6:DDI1:RPN11:PRE4:RPN12:RPN14:SCL1:RPT6:UFD1:PUP2:RPN1:RPN10:RPN2:ADD66:PRE8:ADD37:DSK2:PRE5:PRE6:PUP1:RPT4:RPN8:PRE10:RPN7	42787:910:7005:45116:16192:6895:6896:6511:6513:16485:15031:6461:31146:30433:51865:6397:723:30437:6950:82:43161:7103:86:5977:43254:43328:7035:51382:209:6506:6508:7096
51603	proteolysis involved in cellular protein catabolic process	33 out of 402 genes, 8.2%	147 out of 7288 background genes, 2.0%	1.81e-09	SHP1:NPL4:PBN1:RPN5:CDC34:MFB1:SKP1:GGA1:RPN9:UBC6:DDI1:RPN11:PRE4:RPN12:RPN14:SCL1:RPT6:UFD1:PUP2:RPN1:RPN10:RPN2:ADD66:PRE8:ADD37:DSK2:PRE5:PRE6:PUP1:RPT4:RPN8:PRE10:RPN7	42787:910:7005:45116:16192:6895:6896:6511:6513:16485:15031:6461:31146:30433:51865:6397:723:30437:6950:82:43161:7103:86:5977:43254:43328:7035:51382:209:6506:6508:7096
43632	modification-dependent macromolecule catabolic process	33 out of 402 genes, 8.2%	152 out of 7288 background genes, 2.1%	4.87e-09	SHP1:NPL4:PBN1:RPN5:CDC34:MFB1:SKP1:GGA1:RPN9:UBC6:DDI1:RPN11:PRE4:RPN12:RPN14:SCL1:RPT6:UFD1:PUP2:RPN1:RPN10:RPN2:ADD66:PRE8:ADD37:DSK2:PRE5:PRE6:PUP1:RPT4:RPN8:PRE10:RPN7	42787:910:7005:45116:16192:6895:6896:6511:6513:16485:15031:6461:31146:30433:51865:6397:723:30437:6950:82:43161:7103:86:5977:43254:43328:7035:51382:209:6506:6508:7096
43285	biopolymer catabolic process	45 out of 402 genes, 11.2%	267 out of 7288 background genes, 3.7%	7.44e-09	SHP1:NPL4:PBN1:CDC39:RPN5:CDC34:MFB1:SKP1:GGA1:RPN9:PRB1:EDC2:PCL6:MOT2:UBC6:LSM4:DDI1:RPN11:PRE4:RPN12:RPN14:SCL1:RPT6:UFD1:PUP2:ECM29:RPN1:RPN10:RPN2:RPB4:JSN1:LAP4:ADD66:PRE8:ADD37:DSK2:PRE5:DCP2:PRE6:PUP1:RPT4:RPN8:PRE10:RPN7:GPH1	42787:910:31087:288:289:5980:74:5981:7005:398:45116:16192:6402:6895:122:6896:6406:6511:6513:16485:15031:6461:30163:6357:31146:30433:290:30435:51865:6397:723:30437:6950:9267:82:43161:7103:747:86:5977:749:5979:43254:43328:7035:7124:51382:7039:209:6506:6508:16567:6366:7096:6368
9057	macromolecule catabolic process	51 out of 402 genes, 12.7%	333 out of 7288 background genes, 4.6%	1.14e-08	SHP1:NPL4:PGI1:PBN1:PGK1:CDC39:RPN5:NTH1:CDC34:MFB1:SKP1:GGA1:YPR1:RPN9:PRB1:EDC2:PCL6:MOT2:UBC6:LSM4:DDI1:RPN11:PRE4:RPN12:RPN14:SCL1:RPT6:UFD1:PUP2:ECM29:RPN1:GRE3:RPN10:RPN2:RPB4:JSN1:FBA1:LAP4:ADD66:PRE8:ADD37:DSK2:PRE5:DCP2:PRE6:PUP1:RPT4:RPN8:PRE10:RPN7:GPH1	42787:910:31087:288:19568:289:5980:74:5981:7005:398:45116:16192:6402:6895:122:6896:6406:6511:6513:16485:15031:42843:6461:30163:6357:31146:30433:290:30435:51865:6397:723:30437:9267:6950:82:43161:7103:747:86:5993:5977:749:5979:43254:43328:7035:7124:51382:7039:209:6506:6094:6508:6096:16567:6098:6366:7096:6368
44248	cellular catabolic process	57 out of 402 genes, 14.2%	409 out of 7288 background genes, 5.6%	3.19e-08	SHP1:NPL4:PGI1:PBN1:PGK1:CDC39:RPN5:NTH1:CDC34:SDH4:MFB1:GLO2:SKP1:GGA1:YPR1:RPN9:PRB1:EDC2:PCL6:MOT2:UBC6:LSM4:DDI1:RPN11:DUG1:PRE4:RPN12:RPN14:SCL1:RPT6:UFD1:LSC2:PUP2:RPN1:GRE3:RPN10:RPN2:RPB4:JSN1:BAT2:FBA1:LAP4:ADD66:PRE8:ADD37:DSK2:TGL3:PRE5:DCP2:PRE6:PUP1:RPT4:RPN8:YOR356W:PRE10:RPN7:GPH1	31087:288:289:74:398:6402:6406:6511:6513:42843:30433:290:6629:30435:723:30437:6950:82:6121:7103:5975:86:5977:5979:43254:43328:7035:51382:7039:6094:6096:6098:6099:42787:910:19568:5980:5981:7005:19677:45116:16192:122:6895:6896:19243:16485:6461:15031:6357:31146:9082:9083:51865:6751:6397:9267:6104:43161:747:5993:749:7124:6506:209:6508:19433:16567:6366:7096:6368
9056	catabolic process	58 out of 402 genes, 14.4%	423 out of 7288 background genes, 5.8%	4.1e-08	SHP1:NPL4:PGI1:PBN1:PGK1:CDC39:RPN5:NTH1:CDC34:SDH4:MFB1:GLO2:SKP1:GGA1:YPR1:RPN9:PRB1:EDC2:PCL6:MOT2:UBC6:LSM4:DDI1:RPN11:DUG1:PRE4:RPN12:RPN14:SCL1:RPT6:UFD1:LSC2:PUP2:ECM29:RPN1:GRE3:RPN10:RPN2:RPB4:JSN1:BAT2:FBA1:LAP4:ADD66:PRE8:ADD37:DSK2:TGL3:PRE5:DCP2:PRE6:PUP1:RPT4:RPN8:YOR356W:PRE10:RPN7:GPH1	31087:288:289:74:398:6402:6406:6511:6513:42843:30433:290:6629:30435:723:30437:6950:82:6121:7103:5975:86:5977:5979:43254:43328:7035:51382:7039:6094:6096:6098:6099:42787:910:19568:5980:5981:7005:19677:45116:16192:6895:122:6896:19243:16485:15031:6461:30163:6357:31146:9082:9083:6751:51865:6397:9267:6104:43161:747:5993:749:7124:209:6506:6508:19433:16567:6366:7096:6368
51179	localization	95 out of 402 genes, 23.6%	1018 out of 7288 background genes, 14.0%	5.48e-05	SSA1:SLA1:SFT2:EXO84:CMD1:AGP2:FTH1:SDS24:ADP1:FEN2:CDC50:NPC2:BUG1:GET3:ENT1:NUS1:GLE1:RCR2:EHD3:TVP23:TVP15:IVY1:HSP78:CCC2:PEX3:GGA1:ATO3:RVS167:NHX1:VPS60:ITR1:SSA4:GDI1:DDI1:OLE1:PEX14:GTS1:CHC1:SEC15:ACB1:UFD1:TWF1:CLC1:MVB12:TRX2:ERV29:ERP5:BZZ1:ARC15:SYS1:VPS53:GYP6:EXO70:PHO86:RPB4:VPS35:VPS55:PTK2:ARC19:MYO3:APL2:AVT3:SDS22:VPS1:PAP1:OSH6:SSP120:DIC1:ARC18:SEC61:VPS33:ERV25:GSF2:SUR7:BC…	15879:6835:288:30469:42989:6406:6261:30036:6409:7067:147:6623:8154:6625:51666:6626:6914:15887:723:16973:6412:6414:45324:1:15672:2:226:31204:42493:6631:43001:6635:6636:19740:6855:7005:16192:45045:45046:45047:16197:45332:15680:16558:15031:46713:16050:9408:60:16125:42144:7010:42147:6865:7015:45053:6501:8033:15909:245:6366:15696:15986:74:6873:10038:103:6879:6511:15918:9060:15846:30503:6378:30437:902:…
16192	vesicle-mediated transport	42 out of 402 genes, 10.4%	322 out of 7288 background genes, 4.4%	0.0001	SLA1:SFT2:EXO84:CMD1:FTH1:SDS24:FEN2:CDC50:BUG1:GET3:ENT1:RCR2:EHD3:TVP23:TVP15:GGA1:RVS167:NHX1:VPS60:GDI1:DDI1:CHC1:SEC15:CLC1:TRX2:ERV29:BZZ1:SYS1:VPS53:EXO70:VPS35:VPS55:MYO3:APL2:OSH6:VPS33:ERV25:SUR7:BCH1:COG5:SEC2:VPS27	30469:6261:7067:147:51666:15887:45324:15672:42493:43001:16192:16197:45332:16050:9408:16125:42144:7010:42147:7015:45053:245:103:10038:6511:15918:30503:30437:80:30004:7035:43328:6887:6888:11:910:30447:9651:6890:6891:6893:7114:6895:6896:6897:7047:6605:6827:6970:7121:6038:7126:6979:6259:6904:6906
9987	cellular process	305 out of 402 genes, 75.9%	4701 out of 7288 background genes, 64.5%	0.00029	SSA1:TPD3:PRP45:BDH1:SLA1:RIB1:COR1:PTC3:SHP1:PRX1:ECM21:SFT2:CSG2:HSP26:FES1:EXO84:CMD1:TPS1:AGP2:SSE2:NPL4:EHT1:MED8:PGI1:KTR4:FTH1:NGR1:SDS24:SHM1:HSM3:ILV6:GRX1:PBN1:KAR4:PRD1:PGK1:CWH43:FEN2:CDC39:CDC50:MED2:MDH3:BUG1:GET3:RPN5:ENT1:NUS1:GLE1:NTH1:EHD3:CDC34:PST1:SED1:BMH2:CDC37:SDH4:RAV2:MFB1:IVY1:BTT1:HSP78:CCC2:GLO2:SSD1:DPL1:SKP1:PEX3:TRP4:GGA1:YPR1:RVS167:RPN9:NHX1:SNF1:PHO8:VPS60:PRB1:…	15879:9098:42989:6696:6402:7131:6333:6406:6260:6261:6334:6409:31124:6338:7067:147:51016:15959:6914:722:15887:723:727:5975:5977:5978:9826:5979:6412:6413:6414:51382:6270:1:2:226:31204:42493:6348:32872:43001:1402:1403:730:5980:6855:6783:5981:6784:19677:42710:45116:16192:45045:45046:45047:16197:19243:7155:161:6354:6281:162:6355:15031:165:6357:6359:7088:31146:9408:42144:9267:742:9269:42147:42148:6865:…
51234	establishment of localization	89 out of 402 genes, 22.1%	969 out of 7288 background genes, 13.3%	0.00034	SSA1:SLA1:SFT2:EXO84:CMD1:AGP2:FTH1:SDS24:ADP1:FEN2:CDC50:NPC2:BUG1:GET3:ENT1:NUS1:GLE1:RCR2:EHD3:TVP23:TVP15:IVY1:HSP78:CCC2:PEX3:GGA1:ATO3:RVS167:NHX1:VPS60:ITR1:SSA4:GDI1:DDI1:PEX14:GTS1:CHC1:SEC15:ACB1:UFD1:CLC1:MVB12:TRX2:ERV29:ERP5:BZZ1:SYS1:VPS53:GYP6:EXO70:PHO86:RPB4:VPS35:VPS55:PTK2:MYO3:APL2:AVT3:SDS22:VPS1:PAP1:OSH6:SSP120:DIC1:SEC61:VPS33:ERV25:GSF2:SUR7:BCH1:COG5:POR1:ATX1:SEC2:BOR1:…	15879:6835:6406:6261:6409:7067:147:6914:15887:723:6412:6414:2:31204:42493:43001:19740:6855:16192:45045:45046:45047:16197:15031:9408:42144:42147:6865:45053:6501:8033:245:6366:15986:6873:10038:6879:6511:30503:6378:30437:902:6950:6882:30004:6886:30007:6887:6888:11:6457:51204:910:30447:6890:6891:6893:6895:6896:6897:6605:6397:6970:6038:6979:6616:6617:288:30469:30036:6623:6625:51666:6626:16973:45324:15…
6810	transport	87 out of 402 genes, 21.6%	950 out of 7288 background genes, 13.0%	0.00054	SSA1:SLA1:SFT2:EXO84:CMD1:AGP2:FTH1:SDS24:ADP1:FEN2:CDC50:NPC2:BUG1:GET3:ENT1:NUS1:GLE1:RCR2:EHD3:TVP23:TVP15:IVY1:HSP78:CCC2:PEX3:GGA1:ATO3:RVS167:NHX1:VPS60:ITR1:SSA4:GDI1:DDI1:PEX14:GTS1:CHC1:SEC15:ACB1:UFD1:CLC1:MVB12:TRX2:ERV29:ERP5:BZZ1:SYS1:VPS53:GYP6:EXO70:PHO86:RPB4:VPS35:VPS55:PTK2:MYO3:APL2:AVT3:SDS22:VPS1:PAP1:OSH6:DIC1:SEC61:VPS33:ERV25:GSF2:SUR7:BCH1:COG5:POR1:ATX1:SEC2:BOR1:MDJ2:VP…	15879:6835:6406:6261:6409:7067:147:6914:15887:723:6412:6414:2:31204:42493:43001:19740:6855:16192:45045:45046:45047:16197:15031:9408:42144:42147:6865:45053:6501:8033:245:6366:15986:6873:10038:6879:6511:30503:6378:30437:902:6950:6882:30004:6886:30007:6887:6888:11:6457:51204:910:30447:6890:6891:6893:6895:6896:6897:6605:6397:6970:6038:6979:6616:6617:288:30469:30036:6623:6625:51666:6626:16973:45324:15…
44255	cellular lipid metabolic process	29 out of 402 genes, 7.2%	218 out of 7288 background genes, 3.0%	0.00732	CSG2:AGP2:EHT1:PBN1:CDC50:MDH3:DPL1:ERG28:OLE1:SCS3:ACB1:CHO2:OPI1:ERG9:AYR1:OPI3:URA8:OSH6:GPT2:HMG2:HMG1:ERG13:TGL3:NSG2:PEX11:ATF1:ERG10:FAS2:ANT1	15879:6696:723:1:42493:9267:6865:6506:6874:30433:6887:19856:6897:6970:6108:19433:6113:8654:30469:18065:51666:6629:6631:6633:6635:6636:45332:16485:16559:6644:16125:19395:16126:30636:15909:6654:6656:15918:15846:6735:6665:80:7031:6097:45944:6241:122:15867:51791:6688:19722
51641	cellular localization	60 out of 402 genes, 14.9%	623 out of 7288 background genes, 8.5%	0.00934	SSA1:SFT2:EXO84:CDC50:BUG1:GET3:NUS1:GLE1:IVY1:HSP78:CCC2:PEX3:GGA1:NHX1:VPS60:SSA4:OLE1:PEX14:SEC15:MVB12:TRX2:ERV29:ERP5:ARC15:SYS1:VPS53:GYP6:EXO70:PHO86:RPB4:VPS35:VPS55:ARC19:MYO3:APL2:AVT3:SDS22:VPS1:PAP1:OSH6:SSP120:ARC18:SEC61:VPS33:ERV25:GSF2:BCH1:COG5:SEC2:BOR1:MDJ2:VPS27:ATG3:SOL1:ARC35:MDM38:VPS68:SRP68:TEF1:NCE102	6406:6261:6409:147:6914:723:6412:6414:1:2:226:31204:42493:43001:16192:45045:45046:45047:16197:9408:42144:42147:6865:45053:6501:8033:245:6366:10038:6879:30503:6378:6950:30004:6886:30007:6887:6888:11:6457:51204:910:30447:6890:6891:6893:6895:6896:6897:6605:6970:6038:6979:6616:6617:288:30469:30036:6623:6625:51666:6626:16973:45324:15672:6636:7005:45332:15680:16558:46713:16050:60:16125:7015:103:15918:8…
Function
GOID	GO_term	Cluster frequency	Background frequency	P-value	Gene(s) annotated to the term	Directly Annotated GOID List
4175	endopeptidase activity	19 out of 402 genes, 4.7%	57 out of 7288 background genes, 0.8%	2.84e-08	PRD1:PRB1:RPN11:PRE4:RPN12:SCL1:RPT6:PUP2:RPN1:RPN10:RPN2:STE24:RPN13:PRE8:PRE5:PRE6:PUP1:RPT4:PRE10	4252:8487:4222:30674:4247:16887:4175
16491	oxidoreductase activity	35 out of 402 genes, 8.7%	265 out of 7288 background genes, 3.6%	0.0004	BDH1:YAL061W:COR1:PRX1:ARA1:GRX1:YCP4:MDH3:GDH2:SDH4:YPR1:YEL047C:PRO3:MXR1:COX15:PDA1:OLE1:RNR4:TRX2:GRE3:AYR1:HYR1:QCR8:CCP1:COX8:HMG2:HMG1:ADI1:COX7:MPD2:MDH2:YOR356W:ALD4:ALD6:FAS2	4028:4029:4315:4420:4316:16156:4602:4352:8113:140:4735:3756:8897:16649:4739:47066:15035:4032:721:30508:8177:4033:8379:4129:16702:8121:16616:4364:30060:16653:16491:45290:9055:4748:4130:4768
8233	peptidase activity	24 out of 402 genes, 6.0%	156 out of 7288 background genes, 2.1%	0.00152	PRD1:PRB1:RPN11:YFR006W:DUG1:PRE4:RPN12:SCL1:RPT6:PUP2:RPN1:RPN10:RPN2:STE24:LAP4:RPN13:PRE8:PRE5:PRE6:UBP2:PUP1:RPT4:PRE10:YME1	4222:4247:4175:4176:8769:4843:16887:4250:4252:8487:30674:8451
3824	catalytic activity	150 out of 402 genes, 37.3%	1988 out of 7288 background genes, 27.3%	0.00155	SSA1:TPD3:BDH1:YAL061W:RIB1:COR1:PTC3:PRX1:TPS1:ARA1:EHT1:PGI1:KTR4:SHM1:ILV6:GRX1:PBN1:PRD1:YCP4:ADP1:PGK1:CPR4:CDC39:CDC50:MDH3:GET3:NUS1:GDH2:NTH1:EHD3:CDC34:ALT2:SDH4:HSP78:CCC2:GLO2:DPL1:SKP1:TRP4:YPR1:SNF1:PHO8:YEL047C:PRB1:GPA2:PRO3:MXR1:MOT2:RAD51:UBC6:SSA4:COX15:PDA1:RPN11:YFR006W:GSY1:DUG1:BNA6:PRE4:RPN12:SCL1:PNC1:RPT6:OLE1:CDC55:HOS2:SAP4:CHO2:RNR4:TRX2:LSC2:PUP2:ARG4:RPN1:GRE3:ARO9:E…	4222:51082:4084:4514:19948:42623:140:4372:4373:42626:4805:4806:4735:3860:47066:4739:4012:16758:721:50072:8379:16616:47938:150:3729:4742:19238:4743:4672:158:4674:4748:8094:8451:4679:8810:4026:4310:4028:4029:4315:4316:17136:739:4602:4247:4175:4176:4535:4608:8897:3951:15035:3883:4032:8177:4033:4035:4250:19829:4325:4252:16702:45129:4618:30060:16491:16564:9055:175:4691:8184:4839:4768:16787:16788:4402:…
Component
GOID	GO_term	Cluster frequency	Background frequency	P-value	Gene(s) annotated to the term	Directly Annotated GOID List
44464	cell part	399 out of 402 genes, 99.3%	5495 out of 7288 background genes, 75.4%	1.69e-43	SSA1:TPD3:PRP45:BDH1:YAL061W:SLA1:RIB1:COR1:PTC3:SHP1:PRX1:ECM21:SFT2:YBR016W:CSG2:RFS1:HSP26:IST2:FES1:EXO84:CMD1:TPS1:AGP2:ARA1:APD1:SSE2:NPL4:EHT1:MED8:PGI1:KTR4:FTH1:NGR1:SDS24:PCS60:YBR241C:SHM1:HSM3:ILV6:GRX1:PBN1:KAR4:PRD1:YCP4:ADP1:PGK1:CWH43:FEN2:SYP1:CPR4:CDC39:CDC50:MED2:NPC2:PBP4:BDF2:YET3:MDH3:BUG1:GET3:TMA17:SNA4:YDL144C:RPN5:ENT1:YDL173W:NUS1:GLE1:GDH2:NTH1:RCR2:PST2:EHD3:CDC34:PST…	5749:5678:19005:17119:932:5967:790:46695:938:794:142:35267:145:502:5823:5750:5751:5681:5682:5756:5829:5685:5758:5686:5759:5971:5688:30904:299:30479:43291:151:31206:228:1400:5619:5830:5832:159:1405:5761:5835:5838:5768:300:8023:30121:31932:5621:5622:30125:42645:5624:307:5625:5840:5843:5770:5845:5773:5847:813:5774:5849:5777:5778:5779:45121:31942:31588:30134:43529:30136:5634:30137:5635:8540:8541:5853…
44424	intracellular part	380 out of 402 genes, 94.5%	5052 out of 7288 background genes, 69.3%	1.85e-35	SSA1:TPD3:PRP45:BDH1:YAL061W:SLA1:RIB1:COR1:PTC3:SHP1:PRX1:ECM21:SFT2:CSG2:RFS1:HSP26:FES1:EXO84:CMD1:TPS1:AGP2:ARA1:APD1:SSE2:NPL4:EHT1:MED8:PGI1:KTR4:FTH1:NGR1:SDS24:PCS60:YBR241C:SHM1:HSM3:ILV6:GRX1:PBN1:KAR4:PRD1:YCP4:ADP1:PGK1:CDC39:CDC50:MED2:NPC2:PBP4:BDF2:YET3:MDH3:BUG1:GET3:TMA17:SNA4:YDL144C:RPN5:ENT1:YDL173W:NUS1:GLE1:GDH2:NTH1:RCR2:PST2:EHD3:CDC34:YDR063W:SED1:TVP23:BMH2:TVP15:ALT2:CD…	5749:5678:19005:17119:932:5967:790:46695:938:794:142:35267:145:502:5823:5750:5751:5681:5682:5756:5829:5685:5758:5686:5759:5971:5688:30904:299:30479:43291:151:31206:228:5619:5830:159:5832:1405:5761:5835:5838:5768:300:8023:30121:31932:5622:30125:42645:5624:307:5625:5840:5843:5770:5845:5773:5847:813:5774:5849:5777:5778:5779:45121:31942:31588:30134:43529:30136:30137:5634:5635:8540:8541:5853:5854:5782…
5622	intracellular	381 out of 402 genes, 94.8%	5087 out of 7288 background genes, 69.8%	2.47e-35	SSA1:TPD3:PRP45:BDH1:YAL061W:SLA1:RIB1:COR1:PTC3:SHP1:PRX1:ECM21:SFT2:CSG2:RFS1:HSP26:FES1:EXO84:CMD1:TPS1:AGP2:ARA1:APD1:SSE2:NPL4:EHT1:MED8:PGI1:KTR4:FTH1:NGR1:SDS24:PCS60:YBR241C:SHM1:HSM3:ILV6:GRX1:PBN1:KAR4:PRD1:YCP4:ADP1:PGK1:CDC39:CDC50:MED2:NPC2:PBP4:BDF2:YET3:MDH3:BUG1:GET3:TMA17:SNA4:YDL144C:RPN5:ENT1:YDL173W:NUS1:GLE1:GDH2:NTH1:RCR2:PST2:EHD3:CDC34:YDR063W:SED1:TVP23:BMH2:TVP15:ALT2:CD…	5749:5678:19005:17119:932:5967:790:46695:938:794:142:35267:145:502:5823:5750:5751:5681:5682:5756:5829:5685:5758:5686:5759:5971:5688:30904:299:30479:43291:151:31206:228:5619:5830:159:5832:1405:5761:5835:5838:5768:300:8023:30121:31932:5622:30125:42645:5624:307:5625:5840:5843:5770:5845:5773:5847:813:5774:5849:5777:5778:5779:45121:31942:31588:30134:43529:30136:30137:5634:5635:8540:8541:5853:5854:5782…
5737	cytoplasm	323 out of 402 genes, 80.3%	3694 out of 7288 background genes, 50.7%	2.88e-34	SSA1:TPD3:BDH1:YAL061W:SLA1:RIB1:COR1:PTC3:SHP1:PRX1:ECM21:SFT2:CSG2:RFS1:HSP26:FES1:EXO84:CMD1:TPS1:AGP2:ARA1:APD1:SSE2:NPL4:EHT1:PGI1:KTR4:FTH1:NGR1:SDS24:PCS60:YBR241C:SHM1:HSM3:ILV6:GRX1:PBN1:KAR4:PRD1:YCP4:ADP1:PGK1:CDC39:CDC50:NPC2:PBP4:YET3:MDH3:BUG1:GET3:TMA17:SNA4:YDL144C:ENT1:YDL173W:NUS1:GLE1:GDH2:NTH1:RCR2:PST2:EHD3:CDC34:YDR063W:SED1:TVP23:TVP15:ALT2:CDC37:STB3:SDH4:RAV2:MFB1:IVY1:YD…	5749:19005:17119:932:5967:46695:938:142:145:502:5823:5750:5751:5756:5829:5758:5759:5971:30904:299:30479:43291:151:31206:5619:5830:159:5832:1405:5761:5835:5838:5768:300:8023:30121:31932:30125:42645:5624:5625:5840:5843:5770:5773:813:5774:5849:5777:5778:5779:45121:31942:31588:30134:43529:30136:30137:5634:5635:8540:5853:5854:5782:5783:5784:31518:5786:9277:5788:48471:5789:15629:5641:324:5643:12505:328…
43229	intracellular organelle	304 out of 402 genes, 75.6%	4021 out of 7288 background genes, 55.2%	6.46e-16	SSA1:TPD3:PRP45:YAL061W:SLA1:RIB1:COR1:PTC3:SHP1:PRX1:SFT2:CSG2:HSP26:FES1:CMD1:AGP2:APD1:NPL4:EHT1:MED8:PGI1:KTR4:FTH1:PCS60:YBR241C:SHM1:ILV6:GRX1:PBN1:KAR4:PRD1:YCP4:ADP1:PGK1:CDC39:CDC50:MED2:NPC2:PBP4:BDF2:YET3:MDH3:GET3:TMA17:SNA4:YDL144C:ENT1:NUS1:GLE1:GDH2:RCR2:PST2:EHD3:CDC34:YDR063W:SED1:TVP23:BMH2:TVP15:ALT2:SDH4:MFB1:IVY1:YDR239C:BTT1:HSP78:CCC2:DPL1:SKP1:PEX3:TRP4:GGA1:YPR1:ATO3:RVS1…	5749:5678:19005:17119:932:5967:790:46695:938:794:142:35267:502:5823:5750:5751:5681:5682:5756:5829:5685:5758:5686:5759:5971:5688:30904:299:30479:43291:151:31206:228:5619:5830:159:5832:1405:5761:5835:5768:8023:30121:31932:30125:42645:5624:5625:5840:5843:5770:5773:5847:813:5774:5849:5777:5778:5779:45121:31942:31588:30134:43529:30136:30137:5634:5635:8540:8541:5853:5854:5782:5783:5784:31518:9277:5788:…
43226	organelle	304 out of 402 genes, 75.6%	4022 out of 7288 background genes, 55.2%	6.78e-16	SSA1:TPD3:PRP45:YAL061W:SLA1:RIB1:COR1:PTC3:SHP1:PRX1:SFT2:CSG2:HSP26:FES1:CMD1:AGP2:APD1:NPL4:EHT1:MED8:PGI1:KTR4:FTH1:PCS60:YBR241C:SHM1:ILV6:GRX1:PBN1:KAR4:PRD1:YCP4:ADP1:PGK1:CDC39:CDC50:MED2:NPC2:PBP4:BDF2:YET3:MDH3:GET3:TMA17:SNA4:YDL144C:ENT1:NUS1:GLE1:GDH2:RCR2:PST2:EHD3:CDC34:YDR063W:SED1:TVP23:BMH2:TVP15:ALT2:SDH4:MFB1:IVY1:YDR239C:BTT1:HSP78:CCC2:DPL1:SKP1:PEX3:TRP4:GGA1:YPR1:ATO3:RVS1…	5749:5678:19005:17119:932:5967:790:46695:938:794:142:35267:502:5823:5750:5751:5681:5682:5756:5829:5685:5758:5686:5759:5971:5688:30904:299:30479:43291:151:31206:228:5619:5830:159:5832:1405:5761:5835:5768:8023:30121:31932:30125:42645:5624:5625:5840:5843:5770:5773:5847:813:5774:5849:5777:5778:5779:45121:31942:31588:30134:43529:30136:30137:5634:5635:8540:8541:5853:5854:5782:5783:5784:31518:9277:5788:…
502	proteasome complex (sensu Eukaryota)	23 out of 402 genes, 5.7%	47 out of 7288 background genes, 0.6%	9.04e-15	RPN5:RPN9:RPN11:PRE4:RPN12:RPN14:SCL1:RPT6:NAS6:PUP2:ECM29:RPN1:RPN10:RPN2:RPN13:PRE8:PRE5:PRE6:PUP1:RPT4:RPN8:PRE10:RPN7	502:5829:5838:5634:8540:8541:5783:19773:19774:5737:5739
43227	membrane-bound organelle	282 out of 402 genes, 70.1%	3674 out of 7288 background genes, 50.4%	3.63e-14	SSA1:TPD3:PRP45:YAL061W:RIB1:COR1:PTC3:SHP1:PRX1:SFT2:CSG2:HSP26:AGP2:APD1:NPL4:EHT1:MED8:PGI1:KTR4:FTH1:PCS60:YBR241C:SHM1:ILV6:GRX1:PBN1:KAR4:PRD1:YCP4:ADP1:PGK1:CDC39:CDC50:MED2:NPC2:PBP4:BDF2:YET3:MDH3:GET3:TMA17:SNA4:YDL144C:NUS1:GLE1:GDH2:RCR2:PST2:EHD3:CDC34:YDR063W:SED1:TVP23:BMH2:TVP15:ALT2:SDH4:MFB1:IVY1:HSP78:CCC2:DPL1:SKP1:PEX3:TRP4:GGA1:YPR1:ATO3:NHX1:YDR476C:SNF1:PHO8:VPS60:PSP1:YEL…	5749:5678:19005:17119:932:5967:790:46695:938:794:35267:502:5750:5751:5681:5682:5756:5829:5685:5758:5686:5759:5971:5688:30904:299:30479:43291:151:31206:228:5619:159:5832:1405:5761:5835:5768:8023:30121:31932:30125:42645:5624:5625:5840:5770:5773:5847:813:5774:5849:5777:5778:5779:45121:31942:31588:30134:43529:30136:30137:5634:5635:8540:8541:5853:5782:5783:5784:31518:9277:5788:5789:5641:324:5643:328:3…
43231	intracellular membrane-bound organelle	282 out of 402 genes, 70.1%	3674 out of 7288 background genes, 50.4%	3.63e-14	SSA1:TPD3:PRP45:YAL061W:RIB1:COR1:PTC3:SHP1:PRX1:SFT2:CSG2:HSP26:AGP2:APD1:NPL4:EHT1:MED8:PGI1:KTR4:FTH1:PCS60:YBR241C:SHM1:ILV6:GRX1:PBN1:KAR4:PRD1:YCP4:ADP1:PGK1:CDC39:CDC50:MED2:NPC2:PBP4:BDF2:YET3:MDH3:GET3:TMA17:SNA4:YDL144C:NUS1:GLE1:GDH2:RCR2:PST2:EHD3:CDC34:YDR063W:SED1:TVP23:BMH2:TVP15:ALT2:SDH4:MFB1:IVY1:HSP78:CCC2:DPL1:SKP1:PEX3:TRP4:GGA1:YPR1:ATO3:NHX1:YDR476C:SNF1:PHO8:VPS60:PSP1:YEL…	5749:5678:19005:17119:932:5967:790:46695:938:794:35267:502:5750:5751:5681:5682:5756:5829:5685:5758:5686:5759:5971:5688:30904:299:30479:43291:151:31206:228:5619:159:5832:1405:5761:5835:5768:8023:30121:31932:30125:42645:5624:5625:5840:5770:5773:5847:813:5774:5849:5777:5778:5779:45121:31942:31588:30134:43529:30136:30137:5634:5635:8540:8541:5853:5782:5783:5784:31518:9277:5788:5789:5641:324:5643:328:3…
44444	cytoplasmic part	222 out of 402 genes, 55.2%	2700 out of 7288 background genes, 37.0%	6.12e-12	SSA1:TPD3:SLA1:COR1:PRX1:SFT2:CSG2:FES1:EXO84:CMD1:TPS1:AGP2:ARA1:NPL4:EHT1:PGI1:KTR4:FTH1:NGR1:PCS60:YBR241C:SHM1:ILV6:PBN1:PRD1:YCP4:ADP1:PGK1:CDC50:NPC2:YET3:MDH3:GET3:TMA17:SNA4:ENT1:NUS1:GLE1:GDH2:NTH1:RCR2:PST2:EHD3:SED1:TVP23:TVP15:SDH4:RAV2:MFB1:IVY1:YDR239C:BTT1:HSP78:CCC2:DPL1:SKP1:PEX3:GGA1:ATO3:RVS167:NHX1:YDR476C:SNF1:PHO8:VPS60:PSP1:YEL047C:PRB1:FMP52:GPA2:ERG28:FMP29:UBC6:COX15:PDA…	5749:19005:17119:932:5967:938:142:145:5823:5750:5751:5756:5829:5758:5759:5971:30904:299:30479:43291:151:31206:5619:5830:159:5832:1405:5761:5835:5768:8023:30121:31932:30125:42645:5624:5625:5840:5843:5770:5773:813:5774:5849:5777:5778:5779:45121:31942:31588:30134:43529:30136:30137:5634:5635:8540:5853:5854:5782:5783:5784:31518:5786:9277:5788:48471:5789:15629:5641:324:5643:12505:328:31307:329:5934:593…
5838	proteasome regulatory particle (sensu Eukaryota)	14 out of 402 genes, 3.5%	23 out of 7288 background genes, 0.3%	3.1e-10	RPN5:RPN9:RPN11:RPN12:RPN14:RPT6:NAS6:RPN1:RPN10:RPN2:RPN13:RPT4:RPN8:RPN7	502:5838:5634:8540:8541:5783:5737
8541	proteasome regulatory particle, lid subcomplex (sensu Eukaryota)	7 out of 402 genes, 1.7%	10 out of 7288 background genes, 0.1%	4.73e-05	RPN5:RPN9:RPN11:RPN12:RPN13:RPN8:RPN7	5634:8541
19773	proteasome core complex, alpha-subunit complex (sensu Eukaryota)	6 out of 402 genes, 1.5%	7 out of 7288 background genes, 0.1%	5.6e-05	SCL1:PUP2:PRE8:PRE5:PRE6:PRE10	5829:19773:5739
31090	organelle membrane	65 out of 402 genes, 16.2%	619 out of 7288 background genes, 8.5%	5.65e-05	SSA1:COR1:SFT2:CSG2:AGP2:EHT1:FTH1:PCS60:YBR241C:SNA4:GLE1:TVP23:TVP15:SDH4:MFB1:IVY1:CCC2:PEX3:PHO8:VPS60:FMP52:ERG28:UBC6:COX15:OLE1:PEX14:CHC1:PHB1:CLC1:MVB12:YGR266W:ERG9:GVP36:AYR1:SYS1:IML2:QCR8:STE24:YET1:YJU3:APL2:AVT3:VPS1:COQ9:PEX30:SEC61:COX8:VPS33:HMG2:GSF2:HMG1:COX7:POR1:MDJ2:MDM38:MAM3:VPS68:PEX11:HEM15:TPO4:YOR285W:ATP4:ATP15:YME1:ANT1	5749:5750:5751:5756:5829:5759:151:31206:5832:1405:5768:30121:30125:5624:5840:813:5774:5777:5778:5779:31942:30137:5634:5635:5782:5783:5784:9277:5788:5789:5643:31307:329:12510:31315:5802:274:5737:5739:5886:5887:5811:139:30897:5741:5743:30173:30176
5839	proteasome core complex (sensu Eukaryota)	8 out of 402 genes, 2.0%	15 out of 7288 background genes, 0.2%	0.00011	PRE4:SCL1:PUP2:PRE8:PRE5:PRE6:PUP1:PRE10	5829:19773:19774:5739
16020	membrane	94 out of 402 genes, 23.4%	1080 out of 7288 background genes, 14.8%	0.00058	SSA1:COR1:SFT2:YBR016W:CSG2:IST2:AGP2:NPL4:EHT1:FTH1:PCS60:YBR241C:ADP1:CWH43:FEN2:CPR4:SNA4:NUS1:GLE1:RCR2:PST1:TVP23:TVP15:SDH4:MFB1:IVY1:CCC2:PEX3:ATO3:SNF1:PHO8:VPS60:ITR1:FMP52:GPA2:ERG28:UBC6:COX15:DDI1:HSP12:STE2:OLE1:PEX14:CHC1:PHB1:CLC1:MVB12:YGR266W:ERP5:ERG9:GVP36:SLM1:AYR1:SYS1:IML2:VPS35:QCR8:PTK2:STE24:YET1:YJU3:APL2:AVT3:VPS1:COQ9:PEX30:SEC61:COX8:VPS33:HMG2:SST2:GSF2:SUR7:HMG1:YMR…	5749:5750:5751:5756:5829:5759:30904:151:31206:5619:5832:1405:5768:30121:31932:30125:5624:5840:5773:813:5774:5777:5778:5779:45121:31942:31588:30137:5634:5635:5782:5783:5784:9277:5788:5789:5641:324:5643:12505:31307:329:5933:5934:5935:5938:12510:31315:42175:5802:274:5737:5739:5886:5887:5811:139:30897:31982:16020:5741:16021:5743:30173:30176
15629	actin cytoskeleton	16 out of 402 genes, 4.0%	76 out of 7288 background genes, 1.0%	0.00085	SLA1:ENT1:RVS167:TWF1:BZZ1:CAP2:ARC15:YIR003W:BUD4:CAP1:ARC19:MYO3:ARC18:HOF1:AIP1:ARC35	142:5829:30479:5840:5634:15629:5737:5884:5885:5740:8290
5783	endoplasmic reticulum	40 out of 402 genes, 10.0%	344 out of 7288 background genes, 4.7%	0.00145	CSG2:AGP2:NPL4:PBN1:ADP1:YET3:GET3:NUS1:DPL1:YDR476C:FMP52:ERG28:UBC6:YGL010W:OLE1:SCS3:UFD1:CHO2:RPN1:ERG9:AYR1:PHO86:OPI3:STE24:YET1:GPT2:YLL023C:ORM2:SEC61:HMG2:GSF2:HMG1:CUE4:ERG13:NSG2:MPD2:ALG6:YOR285W:YPR091C:NCE102	5759:31206:5840:5774:43529:5634:5635:8540:5783:5784:5788:5789:42175:5737:5739:5886:5887:5811:5741:16021:30176
Cluster 3
Genes
YKL112W	ABF1	YKL112W
YNR033W	ABZ1	YNR033W
YEL052W	AFG1	YEL052W
YER017C	AFG3	YER017C
YBR110W	ALG1	YBR110W
YGL065C	ALG2	YGL065C
YBL037W	APL3	YBL037W
YGR261C	APL6	YGR261C
YNL059C	ARP5	YNL059C
YNL315C	ATP11	YNL315C
YLR295C	ATP14	YLR295C
YJR121W	ATP2	YJR121W
YBR039W	ATP3	YBR039W
YOR198C	BFR1	YOR198C
YER016W	BIM1	YER016W
YJR076C	CDC11	YJR076C
YDL017W	CDC7	YDL017W
YBR003W	COQ1	YBR003W
YNL052W	COX5A	YNL052W
YNR028W	CPR8	YNR028W
YOL007C	CSI2	YOL007C
YHR175W	CTR2	YHR175W
YDR304C	CPR5	YDR304C
YIR004W	DJP1	YIR004W
YDR068W	DOS2	YDR068W
YGL061C	DUO1	YGL061C
YJL201W	ECM25	YJL201W
YJL196C	ELO1	YJL196C
YFL048C	EMP47	YFL048C
YMR220W	ERG8	YMR220W
YGR207C	non	YGR207C
YMR058W	FET3	YMR058W
YFL041W	FET5	YFL041W
YDR519W	FPR2	YDR519W
YPL262W	FUM1	YPL262W
YBR179C	FZO1	YBR179C
YER027C	GAL83	YER027C
YDL226C	GCS1	YDL226C
YHR061C	GIC1	YHR061C
YER107C	GLE2	YER107C
YBL021C	HAP3	YBL021C
YKR084C	HBS1	YKR084C
YCR065W	HCM1	YCR065W
YDL205C	HEM3	YDL205C
YPL127C	HHO1	YPL127C
YLL022C	HIF1	YLL022C
YIL116W	HIS5	YIL116W
YJR139C	HOM6	YJR139C
YHR127W	non	YHR127W
YOL012C	HTZ1	YOL012C
YGL253W	HXK2	YGL253W
YNL037C	IDH1	YNL037C
YOR136W	IDH2	YOR136W
YCR071C	IMG2	YCR071C
YLR309C	IMH1	YLR309C
YIL026C	IRR1	YIL026C
YHR158C	KEL1	YHR158C
YIL125W	KGD1	YIL125W
YBR205W	KTR3	YBR205W
YHL003C	LAG1	YHL003C
YDR503C	LPP1	YDR503C
YHR024C	MAS2	YHR024C
YBR185C	MBA1	YBR185C
YDL003W	MCD1	YDL003W
YKL085W	MDH1	YKL085W
YFL016C	MDJ1	YFL016C
YPL270W	MDL2	YPL270W
YOR232W	MGE1	YOR232W
YKL089W	MIF2	YKL089W
YJR077C	MIR1	YJR077C
YDR347W	MRP1	YDR347W
YGR084C	MRP13	YGR084C
YHL004W	MRP4	YHL004W
YKL167C	MRP49	YKL167C
YDL202W	MRPL11	YDL202W
YKR006C	MRPL13	YKR006C
YNL185C	MRPL19	YNL185C
YNL005C	MRP7	YNL005C
YKR085C	MRPL20	YKR085C
YOR150W	MRPL23	YOR150W
YMR193W	MRPL24	YMR193W
YGR076C	MRPL25	YGR076C
YBR282W	MRPL27	YBR282W
YKL138C	MRPL31	YKL138C
YCR003W	MRPL32	YCR003W
YMR286W	MRPL33	YMR286W
YDR322W	MRPL35	YDR322W
YBR122C	MRPL36	YBR122C
YBR268W	MRPL37	YBR268W
YKL170W	MRPL38	YKL170W
YML009C	MRPL39	YML009C
YJL096W	MRPL49	YJL096W
YHR147C	MRPL6	YHR147C
YJL063C	MRPL8	YJL063C
YGR220C	MRPL9	YGR220C
YBR251W	MRPS5	YBR251W
YGR014W	MSB2	YGR014W
YOL090W	MSH2	YOL090W
YDR194C	MSS116	YDR194C
YHR086W	NAM8	YHR086W
YGR147C	NAT2	YGR147C
YLR457C	NBP1	YLR457C
YML120C	NDI1	YML120C
YPL124W	SPC29	YPL124W
YLR351C	NIT3	YLR351C
YNL183C	NPR1	YNL183C
YGR038W	ORM1	YGR038W
YER154W	OXA1	YER154W
YGR178C	PBP1	YGR178C
YGR202C	PCT1	YGR202C
YOR158W	PET123	YOR158W
YKL127W	PGM1	YKL127W
YGR231C	PHB2	YGR231C
YNR032W	PPG1	YNR032W
YIL095W	PRK1	YIL095W
YHR037W	PUT2	YHR037W
YGL062W	PYC1	YGL062W
YDR529C	QCR7	YDR529C
YDL103C	QRI1	YDL103C
YKL113C	RAD27	YKL113C
YFR051C	RET2	YFR051C
YJL173C	RFA3	YJL173C
YDR487C	RIB3	YDR487C
YEL024W	RIP1	YEL024W
YER070W	RNR1	YER070W
YNL330C	RPD3	YNL330C
YML091C	RPM2	YML091C
YFL036W	RPO41	YFL036W
YKR008W	RSC4	YKR008W
YDR484W	VPS52	YDR484W
YBR070C	ALG14	YBR070C
YHR103W	SBE22	YHR103W
YBL011W	SCT1	YBL011W
YNL287W	SEC21	YNL287W
YLR268W	SEC22	YLR268W
YDL195W	SEC31	YDL195W
YCR067C	SED4	YCR067C
YDL052C	SLC1	YDL052C
YDR515W	SLF1	YDR515W
YDR189W	SLY1	YDR189W
YFL008W	SMC1	YFL008W
YGL115W	SNF4	YGL115W
YPR032W	SRO7	YPR032W
YHR163W	SOL3	YHR163W
YJL124C	LSM1	YJL124C
YBR253W	SRB6	YBR253W
YIL140W	AXL2	YIL140W
YGL022W	STT3	YGL022W
YLR045C	STU2	YLR045C
YMR054W	STV1	YMR054W
YJL176C	SWI3	YJL176C
YMR149W	SWP1	YMR149W
YBR123C	TFC1	YBR123C
YJL143W	TIM17	YJL143W
YIL022W	TIM44	YIL022W
YGR082W	TOM20	YGR082W
YNL088W	TOP2	YNL088W
YIL138C	TPM2	YIL138C
YDR177W	UBC1	YDR177W
YDL058W	USO1	YDL058W
YAL007C	ERP2	YAL007C
YBR162C	TOS1	YBR162C
YBR260C	RGD1	YBR260C
YBR262C	FMP51	YBR262C
YCR044C	PER1	YCR044C
YDL018C	ERP3	YDL018C
YDR061W	non	YDR061W
YDR116C	MRPL1	YDR116C
YDR175C	RSM24	YDR175C
YDR516C	EMI2	YDR516C
YDR517W	GRH1	YDR517W
YER018C	SPC25	YER018C
YDL120W	YFH1	YDL120W
YFL004W	VTC2	YFL004W
YFL013C	IES1	YFL013C
YFR011C	non	YFR011C
YFR041C	ERJ5	YFR041C
YGL001C	ERG26	YGL001C
YGL020C	GET1	YGL020C
YGL039W	non	YGL039W
YGL068W	MNP1	YGL068W
YGL084C	GUP1	YGL084C
YGL107C	RMD9	YGL107C
YGL129C	RSM23	YGL129C
YGR012W	non	YGR012W
YGR136W	LSB1	YGR136W
YGR163W	GTR2	YGR163W
YGR165W	MRPS35	YGR165W
YGR215W	RSM27	YGR215W
YHL008C	non	YHL008C
YHR059W	FYV4	YHR059W
YHR073W	OSH3	YHR073W
YHR083W	SAM35	YHR083W
YHR108W	GGA2	YHR108W
YIL044C	AGE2	YIL044C
YIL093C	RSM25	YIL093C
YIR010W	DSN1	YIR010W
YJL062W	LAS21	YJL062W
YJL091C	GWT1	YJL091C
YJL104W	PAM16	YJL104W
YJR080C	FMP26	YJR080C
YJR113C	RSM7	YJR113C
YJR116W	non	YJR116W
YJR118C	ILM1	YJR118C
YKL192C	ACP1	YKL192C
YKL195W	MIA40	YKL195W
YKR065C	PAM17	YKR065C
YLR084C	RAX2	YLR084C
YLR328W	NMA1	YLR328W
YLR369W	SSQ1	YLR369W
YLR373C	VID22	YLR373C
YLR386W	VAC14	YLR386W
YML020W	non	YML020W
YML059C	NTE1	YML059C
YMR002W	MIC17	YMR002W
YMR048W	CSM3	YMR048W
YMR113W	FOL3	YMR113W
YMR145C	NDE1	YMR145C
YMR188C	MRPS17	YMR188C
YFR049W	YMR31	YFR049W
YKL067W	YNK1	YKL067W
YNL168C	FMP41	YNL168C
YNL177C	MRPL22	YNL177C
YNL278W	CAF120	YNL278W
YNL310C	ZIM17	YNL310C
YOR131C	non	YOR131C
YOR189W	IES4	YOR189W
YOR247W	SRL1	YOR247W
YOR286W	FMP31	YOR286W
YOR354C	MSC6	YOR354C
YOR372C	NDD1	YOR372C
YKL126W	YPK1	YKL126W
YPL014W	non	YPL014W
YPL087W	YDC1	YPL087W
YPL208W	RKM1	YPL208W
YPR067W	ISA2	YPR067W
GO Enrichments
Process
GOID	GO_term	Cluster frequency	Background frequency	P-value	Gene(s) annotated to the term	Directly Annotated GOID List
9987	cellular process	203 out of 236 genes, 86.0%	4701 out of 7288 background genes, 64.5%	3.45e-11	ERP2:SCT1:HAP3:COQ1:ATP3:ALG14:ALG1:MRPL36:TFC1:FZO1:MBA1:KTR3:MRPS5:SRB6:RGD1:MRPL37:MRPL27:MRPL32:PER1:HCM1:SED4:IMG2:MCD1:CDC7:ERP3:SLC1:USO1:QRI1:YFH1:SEC31:MRPL11:HEM3:GCS1:MRPL1:RSM24:UBC1:SLY1:MSS116:MRPL35:MRP1:VPS52:RIB3:LPP1:SLF1:EMI2:GRH1:QCR7:RIP1:BIM1:AFG3:SPC25:GAL83:RNR1:GLE2:OXA1:VTC2:SMC1:IES1:MDJ1:RPO41:EMP47:ERJ5:YMR31:RET2:ERG26:GET1:STT3:YGL039W:DUO1:PYC1:ALG2:MNP1:GUP1:SNF4:…	715:19655:8298:8299:6696:45026:7131:6402:1682:6333:6406:6260:6261:6334:6407:6408:7064:6409:6265:6338:147:18283:1321:6268:6269:723:724:5977:6412:6342:1:6270:6271:2:6417:42493:7076:6348:1402:43001:1403:8380:731:735:19674:6783:45040:17062:32445:45041:16192:45045:6350:7155:6281:6355:6357:7088:6289:9408:42144:742:42147:747:8104:7231:9847:6506:6508:7165:7094:6366:7096:6298:6000:15986:6006:6008:6874:755…
9058	biosynthetic process	78 out of 236 genes, 33.1%	1220 out of 7288 background genes, 16.7%	2.73e-07	SCT1:COQ1:ATP3:ALG14:ALG1:MRPL36:KTR3:MRPS5:MRPL37:MRPL27:MRPL32:PER1:IMG2:SLC1:QRI1:MRPL11:HEM3:MRPL1:RSM24:MRPL35:MRP1:RIB3:SLF1:AFG3:YMR31:ERG26:GET1:STT3:PYC1:ALG2:MNP1:RSM23:MRPL25:MRP13:MRPS35:PBP1:PCT1:RSM27:MRPL9:LAG1:MRP4:PUT2:MRPL6:RSM25:HIS5:LAS21:MRPL8:GWT1:MRPL49:ELO1:RSM7:ATP2:HOM6:YNK1:MRPL31:MRP49:MRPL38:ACP1:MRPL13:HBS1:MRPL20:ATP14:MRPL39:RPM2:FOL3:SWP1:MRPS17:MRPL24:ERG8:MRPL33…	8299:6696:1682:1321:723:6412:2:6417:42493:6783:45041:6506:6508:15986:6874:6878:46513:6378:45727:6890:6461:6537:6465:27:6396:6397:6102:10133:30026:19368:8654:6048:6986:6555:6486:6487:6488:9396:9102:6633:6562:6490:6566:6493:7005:9117:6656:6657:105:9060:30148:16070:6164:6165:6094:9142:6099:6740:6744:45944:7047:1302:6826:6259:9231:9090
9060	aerobic respiration	16 out of 236 genes, 6.8%	80 out of 7288 background genes, 1.1%	2.88e-06	MBA1:MRPL1:RSM24:RIB3:QCR7:RIP1:MNP1:MRPS35:KGD1:MDH1:MRPS17:IDH1:MRPL22:IDH2:FUM1:MDL2	6412:17062:6537:6102:6103:6106:6108:6122:7007:9060:6099:9231
44249	cellular biosynthetic process	72 out of 236 genes, 30.5%	1143 out of 7288 background genes, 15.7%	3.53e-06	COQ1:ATP3:ALG14:ALG1:MRPL36:KTR3:MRPS5:MRPL37:MRPL27:MRPL32:PER1:IMG2:QRI1:MRPL11:HEM3:MRPL1:RSM24:MRPL35:MRP1:RIB3:SLF1:AFG3:YMR31:GET1:STT3:PYC1:ALG2:MNP1:RSM23:MRPL25:MRP13:MRPS35:PBP1:RSM27:MRPL9:MRP4:PUT2:MRPL6:RSM25:HIS5:LAS21:MRPL8:GWT1:MRPL49:ELO1:RSM7:ATP2:HOM6:YNK1:MRPL31:MRP49:MRPL38:ACP1:MRPL13:HBS1:MRPL20:ATP14:MRPL39:RPM2:FOL3:SWP1:MRPS17:MRPL24:MRPL33:MRP7:IDH1:MRPL22:MRPL19:IDH2:M…	1682:1321:723:6412:2:6417:42493:6783:45041:6506:6508:15986:6874:6878:6378:45727:6890:6461:6537:6465:27:6396:6397:6102:10133:30026:19368:6048:6986:6555:6486:6487:6488:9396:9102:6633:6562:6490:6566:6493:7005:9117:105:9060:16070:6164:6165:6094:9142:6099:6740:6744:45944:7047:6826:6259:9231:9090
45333	cellular respiration	16 out of 236 genes, 6.8%	86 out of 7288 background genes, 1.2%	8.69e-06	MBA1:MRPL1:RSM24:RIB3:QCR7:RIP1:MNP1:MRPS35:KGD1:MDH1:MRPS17:IDH1:MRPL22:IDH2:FUM1:MDL2	6412:17062:6537:6102:6103:6106:6108:6122:7007:9060:6099:9231
43681	protein import into mitochondrion	10 out of 236 genes, 4.2%	37 out of 7288 background genes, 0.5%	0.00013	AFG3:TOM20:SAM35:TIM44:PAM16:TIM17:MIA40:PAM17:ZIM17:MGE1	6412:45040:45041:6508:6457:6605:6461:6465:6986:7005:30150
9059	macromolecule biosynthetic process	56 out of 236 genes, 23.7%	872 out of 7288 background genes, 12.0%	0.00017	ALG14:ALG1:MRPL36:KTR3:MRPS5:MRPL37:MRPL27:MRPL32:PER1:IMG2:QRI1:MRPL11:MRPL1:RSM24:MRPL35:MRP1:SLF1:AFG3:YMR31:GET1:STT3:PYC1:ALG2:MNP1:RSM23:MRPL25:MRP13:MRPS35:PBP1:RSM27:MRPL9:MRP4:MRPL6:RSM25:LAS21:MRPL8:GWT1:MRPL49:RSM7:MRPL31:MRP49:MRPL38:MRPL13:HBS1:MRPL20:MRPL39:RPM2:SWP1:MRPS17:MRPL24:MRPL33:MRP7:MRPL22:MRPL19:MRPL23:PET123	1682:723:6412:2:6417:42493:45041:6506:6508:6874:6878:6378:45727:6890:6461:6465:27:6396:6397:30026:6048:6986:6486:6487:6488:6490:6493:7005:9060:6094:6740:45944:7047
6626	protein targeting to mitochondrion	11 out of 236 genes, 4.7%	49 out of 7288 background genes, 0.7%	0.00024	AFG3:TOM20:MAS2:SAM35:TIM44:PAM16:TIM17:MIA40:PAM17:ZIM17:MGE1	6412:45040:45041:6508:6457:6605:6461:6465:6986:6627:7005:30150
6091	generation of precursor metabolites and energy	30 out of 236 genes, 12.7%	336 out of 7288 background genes, 4.6%	0.00025	ATP3:ALG1:MBA1:QRI1:MRPL1:RSM24:RIB3:QCR7:RIP1:PYC1:ALG2:MNP1:HXK2:MRPS35:SOL3:KGD1:ATP2:MDH1:PGM1:ATP14:NDI1:NDE1:MRPS17:IDH1:COX5A:MRPL22:PPG1:IDH2:FUM1:MDL2	19655:1321:5977:6412:17062:32445:6000:15986:6006:6008:6010:6013:46015:6537:6102:6103:6106:6108:6470:6116:43065:6048:6487:6120:6122:6123:6490:7007:9051:9060:6094:6096:6099:6740:1300:1302:46323:9231:8361
8152	metabolic process	150 out of 236 genes, 63.6%	3509 out of 7288 background genes, 48.1%	0.00071	SCT1:HAP3:COQ1:ATP3:ALG14:ALG1:MRPL36:TFC1:MBA1:KTR3:MRPS5:SRB6:MRPL37:MRPL27:MRPL32:PER1:HCM1:IMG2:CDC7:SLC1:USO1:QRI1:YFH1:MRPL11:HEM3:MRPL1:RSM24:UBC1:MSS116:MRPL35:MRP1:RIB3:LPP1:SLF1:EMI2:QCR7:RIP1:BIM1:AFG3:GAL83:RNR1:SMC1:IES1:MDJ1:RPO41:ERJ5:YMR31:ERG26:GET1:STT3:PYC1:ALG2:MNP1:GUP1:SNF4:RSM23:HXK2:MRPL25:MRP13:NAT2:MRPS35:PBP1:PCT1:RSM27:MRPL9:PHB2:LAG1:MRP4:MAS2:PUT2:NAM8:GGA2:MRPL6:SOL…	715:19655:8298:8299:6696:7131:6402:1682:6333:6260:6261:6334:7064:6265:6338:147:18283:1321:6268:6269:723:724:5977:6412:6342:1:6270:6271:2:6417:42493:6348:1403:8380:731:735:19674:6783:17062:32445:45041:16192:6350:7155:6281:6355:6357:7088:6289:9408:9847:6506:6508:7165:7094:6366:6298:6000:15986:6006:6008:6874:45132:6878:6879:6513:46513:183:6376:30433:6378:6010:30437:6013:6880:46015:6887:6888:11:6457:…
44237	cellular metabolic process	147 out of 236 genes, 62.3%	3429 out of 7288 background genes, 47.0%	0.00095	SCT1:HAP3:COQ1:ATP3:ALG14:ALG1:MRPL36:TFC1:MBA1:KTR3:MRPS5:SRB6:MRPL37:MRPL27:MRPL32:PER1:HCM1:IMG2:CDC7:SLC1:QRI1:YFH1:MRPL11:HEM3:MRPL1:RSM24:UBC1:MSS116:MRPL35:MRP1:RIB3:LPP1:SLF1:EMI2:QCR7:RIP1:BIM1:AFG3:GAL83:RNR1:SMC1:IES1:MDJ1:RPO41:ERJ5:YMR31:ERG26:GET1:STT3:PYC1:ALG2:MNP1:GUP1:SNF4:RSM23:HXK2:MRPL25:MRP13:NAT2:MRPS35:PBP1:PCT1:RSM27:MRPL9:PHB2:LAG1:MRP4:MAS2:PUT2:NAM8:GGA2:MRPL6:SOL3:RSM…	715:19655:8298:8299:6696:7131:6402:1682:6333:6260:6261:6334:7064:6265:6338:147:18283:1321:6268:6269:723:724:5977:6412:6342:1:6270:6271:2:6417:42493:6348:1403:8380:731:735:19674:6783:17062:32445:45041:16192:6350:7155:6281:6355:6357:7088:6289:9408:9847:6506:6508:7165:7094:6366:6298:6000:15986:6006:6008:6874:45132:6878:6879:6513:46513:183:6376:30433:6378:6010:30437:6013:6880:46015:6887:11:6457:6384:…
51186	cofactor metabolic process	19 out of 236 genes, 8.1%	168 out of 7288 background genes, 2.3%	0.00137	COQ1:ATP3:YFH1:HEM3:PYC1:SOL3:KGD1:ATP2:MDH1:ATP14:NMA1:NDI1:FOL3:NDE1:IDH1:ABZ1:IDH2:FUM1:ISA2	19655:18283:1321:42493:19674:6783:15986:6879:6537:6102:6103:6106:6108:6116:43065:46482:6120:9396:9102:9051:6800:6094:6099:6740:6744:1300:6826
6839	mitochondrial transport	11 out of 236 genes, 4.7%	62 out of 7288 background genes, 0.9%	0.00295	AFG3:TOM20:MAS2:SAM35:TIM44:PAM16:TIM17:MIA40:PAM17:ZIM17:MGE1	6412:45040:45041:6508:6457:6605:6461:6465:6986:6627:7005:30150
30150	protein import into mitochondrial matrix	7 out of 236 genes, 3.0%	22 out of 7288 background genes, 0.3%	0.00296	TOM20:TIM44:PAM16:TIM17:PAM17:ZIM17:MGE1	6457:6986:7005:30150
6412	translation	44 out of 236 genes, 18.6%	684 out of 7288 background genes, 9.4%	0.00451	MRPL36:MRPS5:MRPL37:MRPL27:MRPL32:IMG2:MRPL11:MRPL1:RSM24:MRPL35:MRP1:SLF1:AFG3:YMR31:MNP1:RSM23:MRPL25:MRP13:MRPS35:PBP1:RSM27:MRPL9:MRP4:MRPL6:RSM25:MRPL8:MRPL49:RSM7:MRPL31:MRP49:MRPL38:MRPL13:HBS1:MRPL20:MRPL39:RPM2:MRPS17:MRPL24:MRPL33:MRP7:MRPL22:MRPL19:MRPL23:PET123	1682:723:6412:2:6417:42493:45041:6508:6878:6378:45727:6461:6465:27:6396:6397:7005:9060:45944
6732	coenzyme metabolic process	16 out of 236 genes, 6.8%	135 out of 7288 background genes, 1.9%	0.00503	COQ1:ATP3:PYC1:SOL3:KGD1:ATP2:MDH1:ATP14:NMA1:NDI1:FOL3:NDE1:IDH1:ABZ1:IDH2:FUM1	19655:1321:19674:15986:6537:6102:6103:6106:6108:6116:43065:46482:6120:9396:9051:6094:6099:6740:6744:1300
44238	primary metabolic process	137 out of 236 genes, 58.1%	3207 out of 7288 background genes, 44.0%	0.00563	SCT1:HAP3:ATP3:ALG14:ALG1:MRPL36:TFC1:KTR3:MRPS5:SRB6:MRPL37:MRPL27:MRPL32:PER1:HCM1:IMG2:CDC7:SLC1:USO1:QRI1:YFH1:MRPL11:MRPL1:RSM24:UBC1:MSS116:MRPL35:MRP1:LPP1:SLF1:EMI2:QCR7:BIM1:AFG3:GAL83:RNR1:SMC1:IES1:MDJ1:RPO41:ERJ5:YMR31:ERG26:GET1:STT3:PYC1:ALG2:MNP1:SNF4:RSM23:HXK2:MRPL25:MRP13:NAT2:MRPS35:PBP1:PCT1:RSM27:MRPL9:PHB2:LAG1:MRP4:MAS2:PUT2:NAM8:GGA2:MRPL6:SOL3:RSM25:PRK1:HIS5:KGD1:LAS21:M…	715:19655:8299:6696:7131:6402:1682:6333:6260:6261:6334:7064:6265:6338:147:18283:1321:6268:6269:723:724:5977:6412:6342:6270:6271:2:6417:42493:6348:1403:8380:731:735:19674:17062:32445:45041:6350:7155:6281:6355:6357:7088:6289:9408:9847:6506:6508:7165:7094:6366:6298:6000:15986:6006:6008:6874:45132:6878:6879:6513:46513:183:6376:30433:6378:6010:30437:6013:6880:46015:6888:11:6457:6384:19:45727:910:43044…
15980	energy derivation by oxidation of organic compounds	25 out of 236 genes, 10.6%	298 out of 7288 background genes, 4.1%	0.0081	ALG1:MBA1:QRI1:MRPL1:RSM24:RIB3:QCR7:RIP1:PYC1:ALG2:MNP1:HXK2:MRPS35:SOL3:KGD1:MDH1:PGM1:NDE1:MRPS17:IDH1:MRPL22:PPG1:IDH2:FUM1:MDL2	19655:5977:6412:17062:32445:6000:6006:6008:6010:6013:46015:6537:6102:6103:6106:6108:6470:6116:6048:6487:6122:6490:7007:9051:9060:6094:6096:6099:6740:1300:1302:46323:9231:8361
Function
GOID	GO_term	Cluster frequency	Background frequency	P-value	Gene(s) annotated to the term	Directly Annotated GOID List
3735	structural constituent of ribosome	39 out of 236 genes, 16.5%	230 out of 7288 background genes, 3.2%	1.01e-15	MRPL36:MRPS5:MRPL37:MRPL27:MRPL32:IMG2:MRPL11:MRPL1:RSM24:MRPL35:MRP1:YMR31:MNP1:RSM23:MRPL25:MRP13:MRPS35:RSM27:MRPL9:MRP4:MRPL6:RSM25:MRPL8:MRPL49:RSM7:MRPL31:MRP49:MRPL38:MRPL13:MRPL20:MRPL39:MRPS17:MRPL24:MRPL33:MRP7:MRPL22:MRPL19:MRPL23:PET123	1900-06-03 15:48:49
5198	structural molecule activity	48 out of 236 genes, 20.3%	358 out of 7288 background genes, 4.9%	1.98e-15	MRPL36:MRPS5:SRB6:MRPL37:MRPL27:MRPL32:IMG2:SEC31:MRPL11:MRPL1:RSM24:MRPL35:MRP1:BIM1:SPC25:GLE2:YMR31:DUO1:MNP1:RSM23:MRPL25:MRP13:MRPS35:RSM27:MRPL9:MRP4:MRPL6:RSM25:MRPL8:MRPL49:CDC11:RSM7:MRPL31:MRP49:MRPL38:MRPL13:MRPL20:STU2:MRPL39:MRPS17:MRPL24:MRPL33:MRP7:MRPL22:MRPL19:MRPL23:PET123:SPC29	5200:16455:3735:48:49:5545:8017:5198
Component
GOID	GO_term	Cluster frequency	Background frequency	P-value	Gene(s) annotated to the term	Directly Annotated GOID List
31980	mitochondrial lumen	54 out of 236 genes, 22.9%	166 out of 7288 background genes, 2.3%	2.02e-38	MRPL36:MRPS5:MRPL37:MRPL27:MRPL32:IMG2:YFH1:MRPL11:MRPL1:RSM24:MSS116:MRPL35:MRP1:RPO41:YMR31:MNP1:RSM23:MRPL25:MRP13:MRPS35:RSM27:MRPL9:MRP4:MAS2:MRPL6:TIM44:RSM25:KGD1:MRPL8:MRPL49:RSM7:MDH1:MRPL31:MRP49:MRPL38:MRPL13:MRPL20:SSQ1:MRPL39:NDI1:MRPS17:MRPL24:MRPL33:MRP7:IDH1:MRPL22:MRPL19:ZIM17:ATP11:IDH2:MRPL23:PET123:MGE1:FUM1	9353:17087:5759:42645:1405:5761:5762:5739:5763:5829
5759	mitochondrial matrix	54 out of 236 genes, 22.9%	166 out of 7288 background genes, 2.3%	2.02e-38	MRPL36:MRPS5:MRPL37:MRPL27:MRPL32:IMG2:YFH1:MRPL11:MRPL1:RSM24:MSS116:MRPL35:MRP1:RPO41:YMR31:MNP1:RSM23:MRPL25:MRP13:MRPS35:RSM27:MRPL9:MRP4:MAS2:MRPL6:TIM44:RSM25:KGD1:MRPL8:MRPL49:RSM7:MDH1:MRPL31:MRP49:MRPL38:MRPL13:MRPL20:SSQ1:MRPL39:NDI1:MRPS17:MRPL24:MRPL33:MRP7:IDH1:MRPL22:MRPL19:ZIM17:ATP11:IDH2:MRPL23:PET123:MGE1:FUM1	9353:17087:5759:42645:1405:5761:5762:5763:5739:5829
44429	mitochondrial part	80 out of 236 genes, 33.9%	443 out of 7288 background genes, 6.1%	8.34e-38	ATP3:MRPL36:FZO1:MBA1:MRPS5:MRPL37:MRPL27:MRPL32:IMG2:YFH1:MRPL11:MRPL1:RSM24:MSS116:MRPL35:MRP1:RIB3:QCR7:RIP1:AFG3:OXA1:MDJ1:RPO41:YMR31:MNP1:RSM23:YGR012W:MRPL25:TOM20:MRP13:MRPS35:RSM27:MRPL9:PHB2:MRP4:MAS2:SAM35:MRPL6:TIM44:RSM25:KGD1:MRPL8:MRPL49:PAM16:TIM17:MIR1:RSM7:ATP2:YNK1:MDH1:MRPL31:MRP49:MRPL38:MIA40:MRPL13:PAM17:MRPL20:ATP14:SSQ1:MRPL39:RPM2:NDI1:MIC17:MRPS17:MRPL24:MRPL33:MRP7:IDH…	9353:5758:5759:932:30678:17087:19898:42645:5625:5634:5740:1401:5741:16021:5750:5742:5751:5743:31307:5744:1405:5737:5745:5761:5754:5762:276:5739:5763:5756:5829
313	organellar ribosome	39 out of 236 genes, 16.5%	83 out of 7288 background genes, 1.1%	1.99e-34	MRPL36:MRPS5:MRPL37:MRPL27:MRPL32:IMG2:MRPL11:MRPL1:RSM24:MRPL35:MRP1:YMR31:MNP1:RSM23:MRPL25:MRP13:MRPS35:RSM27:MRPL9:MRP4:MRPL6:RSM25:MRPL8:MRPL49:RSM7:MRPL31:MRP49:MRPL38:MRPL13:MRPL20:MRPL39:MRPS17:MRPL24:MRPL33:MRP7:MRPL22:MRPL19:MRPL23:PET123	5761:5762:5763:5739
5761	mitochondrial ribosome	39 out of 236 genes, 16.5%	83 out of 7288 background genes, 1.1%	1.99e-34	MRPL36:MRPS5:MRPL37:MRPL27:MRPL32:IMG2:MRPL11:MRPL1:RSM24:MRPL35:MRP1:YMR31:MNP1:RSM23:MRPL25:MRP13:MRPS35:RSM27:MRPL9:MRP4:MRPL6:RSM25:MRPL8:MRPL49:RSM7:MRPL31:MRP49:MRPL38:MRPL13:MRPL20:MRPL39:MRPS17:MRPL24:MRPL33:MRP7:MRPL22:MRPL19:MRPL23:PET123	5761:5762:5763:5739
44444	cytoplasmic part	168 out of 236 genes, 71.2%	2700 out of 7288 background genes, 37.0%	7.9e-25	ERP2:SCT1:APL3:COQ1:ATP3:ALG14:ALG1:MRPL36:TOS1:FZO1:MBA1:MRPS5:RGD1:FMP51:MRPL37:MRPL27:MRPL32:PER1:SED4:IMG2:SLC1:YFH1:SEC31:MRPL11:GCS1:YDR061W:MRPL1:RSM24:SLY1:MSS116:CPR5:MRPL35:MRP1:VPS52:RIB3:FPR2:QCR7:RIP1:AFG1:BIM1:AFG3:RNR1:OXA1:VTC2:MDJ1:RPO41:FET5:EMP47:YFR011C:ERJ5:YMR31:RET2:ERG26:GET1:STT3:DUO1:PYC1:ALG2:MNP1:GUP1:RMD9:RSM23:HXK2:YGR012W:ORM1:MRPL25:TOM20:MRP13:NAT2:GTR2:MRPS35:PBP…	5856:5783:9277:932:5789:938:17087:795:142:144:324:5823:5750:5751:31307:329:5754:5933:5934:5829:5756:9353:5935:5758:5759:5938:5971:5793:5794:30478:30479:220:43541:1400:5619:1401:1405:5761:5940:5762:5763:5768:30482:5876:43332:42175:776:30122:778:30123:5621:42645:30126:19898:5624:30127:5802:5625:5628:5737:5770:276:5739:5844:5845:5773:5774:5881:31902:5886:5887:131:30678:30134:43529:30136:5811:8250:42…
44464	cell part	234 out of 236 genes, 99.2%	5495 out of 7288 background genes, 75.4%	2.97e-24	ERP2:SCT1:HAP3:APL3:COQ1:ATP3:ALG14:ALG1:MRPL36:TFC1:TOS1:FZO1:MBA1:KTR3:MRPS5:SRB6:RGD1:FMP51:MRPL37:MRPL27:MRPL32:PER1:HCM1:SED4:IMG2:MCD1:CDC7:ERP3:SLC1:USO1:QRI1:YFH1:SEC31:MRPL11:HEM3:GCS1:YDR061W:DOS2:MRPL1:RSM24:UBC1:SLY1:MSS116:CPR5:MRPL35:MRP1:VPS52:RIB3:LPP1:SLF1:EMI2:GRH1:FPR2:QCR7:RIP1:AFG1:BIM1:AFG3:SPC25:GAL83:RNR1:GLE2:OXA1:VTC2:SMC1:IES1:MDJ1:RPO41:FET5:EMP47:YFR011C:ERJ5:YMR31:RE…	5678:5856:5783:9277:932:5789:16602:790:31011:938:17087:795:142:144:798:5641:502:324:5643:5823:5750:5751:31307:329:508:509:5754:5933:5934:5829:5756:9353:5935:5685:5758:5759:5938:5971:5793:5794:30478:30479:113:220:43541:118:119:228:1400:5619:1401:16585:16586:1405:5761:5940:5762:5763:5768:30482:5876:43332:16514:42175:30014:123:776:30122:30123:778:5621:5622:127:19898:30126:42645:5802:30127:5624:5625:…
315	organellar large ribosomal subunit	25 out of 236 genes, 10.6%	45 out of 7288 background genes, 0.6%	8.12e-24	MRPL36:MRPL37:MRPL27:MRPL32:IMG2:MRPL11:MRPL1:MRPL35:MRPL25:MRPL9:MRPL6:MRPL8:MRPL49:MRPL31:MRP49:MRPL38:MRPL13:MRPL20:MRPL39:MRPL24:MRPL33:MRP7:MRPL22:MRPL19:MRPL23	5762:5739
5762	mitochondrial large ribosomal subunit	25 out of 236 genes, 10.6%	45 out of 7288 background genes, 0.6%	8.12e-24	MRPL36:MRPL37:MRPL27:MRPL32:IMG2:MRPL11:MRPL1:MRPL35:MRPL25:MRPL9:MRPL6:MRPL8:MRPL49:MRPL31:MRP49:MRPL38:MRPL13:MRPL20:MRPL39:MRPL24:MRPL33:MRP7:MRPL22:MRPL19:MRPL23	5762:5739
5739	mitochondrion	102 out of 236 genes, 43.2%	1103 out of 7288 background genes, 15.1%	1.33e-23	COQ1:ATP3:MRPL36:FZO1:MBA1:MRPS5:FMP51:MRPL37:MRPL27:MRPL32:IMG2:YFH1:MRPL11:YDR061W:MRPL1:RSM24:MSS116:MRPL35:MRP1:RIB3:QCR7:RIP1:AFG1:AFG3:OXA1:MDJ1:RPO41:YFR011C:YMR31:GET1:MNP1:RMD9:RSM23:HXK2:YGR012W:MRPL25:TOM20:MRP13:NAT2:MRPS35:PBP1:YGR207C:RSM27:MRPL9:PHB2:MRP4:MAS2:PUT2:FYV4:SAM35:MRPL6:TIM44:RSM25:KGD1:MRPL8:MRPL49:PAM16:TIM17:MIR1:FMP26:RSM7:ATP2:YNK1:MDH1:MRPL31:MRP49:MRPL38:ACP1:MIA…	5783:932:17087:795:5750:5751:31307:5754:5829:5756:5935:9353:5758:5759:1401:1405:5761:5762:5763:5621:19898:42645:5625:5737:276:5844:5739:30678:43529:5634:5740:16020:5741:16021:5742:5743:5744:5745
43227	membrane-bound organelle	192 out of 236 genes, 81.4%	3674 out of 7288 background genes, 50.4%	3.29e-21	ERP2:SCT1:HAP3:APL3:COQ1:ATP3:ALG14:ALG1:MRPL36:TFC1:TOS1:FZO1:MBA1:MRPS5:SRB6:FMP51:MRPL37:MRPL27:MRPL32:PER1:HCM1:SED4:IMG2:MCD1:CDC7:QRI1:YFH1:SEC31:MRPL11:HEM3:GCS1:YDR061W:MRPL1:RSM24:SLY1:MSS116:CPR5:MRPL35:MRP1:VPS52:RIB3:FPR2:QCR7:RIP1:AFG1:AFG3:SPC25:GAL83:GLE2:OXA1:VTC2:SMC1:IES1:MDJ1:RPO41:FET5:EMP47:YFR011C:ERJ5:YMR31:RET2:ERG26:GET1:STT3:DUO1:ALG2:MNP1:GUP1:RMD9:SNF4:RSM23:HXK2:YGR01…	5678:5856:5783:9277:932:5789:16602:790:31011:938:17087:795:798:5641:324:5643:5823:5750:5751:31307:329:508:509:5754:5934:5829:5756:5935:9353:5685:5758:5759:5938:5793:5794:113:220:43541:118:119:228:1401:16585:16586:1405:5761:5762:5763:5768:5876:16514:42175:30014:123:776:30122:778:5621:127:19898:30126:42645:5802:30127:5624:5625:16592:5662:5737:5770:31431:276:5844:5739:5773:5774:922:818:31902:5886:58…
43231	intracellular membrane-bound organelle	192 out of 236 genes, 81.4%	3674 out of 7288 background genes, 50.4%	3.29e-21	ERP2:SCT1:HAP3:APL3:COQ1:ATP3:ALG14:ALG1:MRPL36:TFC1:TOS1:FZO1:MBA1:MRPS5:SRB6:FMP51:MRPL37:MRPL27:MRPL32:PER1:HCM1:SED4:IMG2:MCD1:CDC7:QRI1:YFH1:SEC31:MRPL11:HEM3:GCS1:YDR061W:MRPL1:RSM24:SLY1:MSS116:CPR5:MRPL35:MRP1:VPS52:RIB3:FPR2:QCR7:RIP1:AFG1:AFG3:SPC25:GAL83:GLE2:OXA1:VTC2:SMC1:IES1:MDJ1:RPO41:FET5:EMP47:YFR011C:ERJ5:YMR31:RET2:ERG26:GET1:STT3:DUO1:ALG2:MNP1:GUP1:RMD9:SNF4:RSM23:HXK2:YGR01…	5678:5856:5783:9277:932:5789:16602:790:31011:938:17087:795:798:5641:324:5643:5823:5750:5751:31307:329:508:509:5754:5934:5829:5756:5935:9353:5685:5758:5759:5938:5793:5794:113:220:43541:118:119:228:1401:16585:16586:1405:5761:5762:5763:5768:5876:16514:42175:30014:123:776:30122:778:5621:127:19898:30126:42645:5802:30127:5624:5625:16592:5662:5737:5770:31431:276:5844:5739:5773:5774:922:818:31902:5886:58…
5622	intracellular	225 out of 236 genes, 95.3%	5087 out of 7288 background genes, 69.8%	3.32e-21	ERP2:SCT1:HAP3:APL3:COQ1:ATP3:ALG14:ALG1:MRPL36:TFC1:TOS1:FZO1:MBA1:MRPS5:SRB6:RGD1:FMP51:MRPL37:MRPL27:MRPL32:PER1:HCM1:SED4:IMG2:MCD1:CDC7:SLC1:QRI1:YFH1:SEC31:MRPL11:HEM3:GCS1:YDR061W:DOS2:MRPL1:RSM24:UBC1:SLY1:MSS116:CPR5:MRPL35:MRP1:VPS52:RIB3:SLF1:EMI2:GRH1:FPR2:QCR7:RIP1:AFG1:BIM1:AFG3:SPC25:GAL83:RNR1:GLE2:OXA1:VTC2:SMC1:IES1:MDJ1:RPO41:FET5:EMP47:YFR011C:ERJ5:YMR31:RET2:ERG26:GET1:STT3:Y…	5678:5856:5783:9277:932:5789:16602:790:31011:938:17087:795:142:144:798:5641:502:324:5643:5823:5750:5751:31307:329:508:509:5754:5933:5934:5829:5756:9353:5935:5685:5758:5759:5938:5971:5793:5794:30478:30479:113:220:43541:118:119:228:1400:5619:1401:16585:16586:1405:5761:5940:5762:5763:5768:30482:5876:43332:16514:42175:30014:123:776:30122:30123:778:5621:5622:127:19898:30126:42645:5802:30127:5624:5625:…
44424	intracellular part	224 out of 236 genes, 94.9%	5052 out of 7288 background genes, 69.3%	7.04e-21	ERP2:SCT1:HAP3:APL3:COQ1:ATP3:ALG14:ALG1:MRPL36:TFC1:TOS1:FZO1:MBA1:MRPS5:SRB6:RGD1:FMP51:MRPL37:MRPL27:MRPL32:PER1:HCM1:SED4:IMG2:MCD1:CDC7:SLC1:QRI1:YFH1:SEC31:MRPL11:HEM3:GCS1:YDR061W:DOS2:MRPL1:RSM24:UBC1:SLY1:MSS116:CPR5:MRPL35:MRP1:VPS52:RIB3:SLF1:EMI2:GRH1:FPR2:QCR7:RIP1:AFG1:BIM1:AFG3:SPC25:GAL83:RNR1:GLE2:OXA1:VTC2:SMC1:IES1:MDJ1:RPO41:FET5:EMP47:YFR011C:ERJ5:YMR31:RET2:ERG26:GET1:STT3:Y…	5678:5856:5783:9277:932:5789:16602:790:31011:938:17087:795:142:144:798:5641:502:324:5643:5823:5750:5751:31307:329:508:509:5754:5933:5934:5829:5756:9353:5935:5685:5758:5759:5938:5971:5793:5794:30478:30479:113:220:43541:118:119:228:1400:5619:1401:16585:16586:1405:5761:5940:5762:5763:5768:30482:5876:43332:16514:42175:30014:123:776:30122:30123:778:5621:127:19898:30126:42645:5802:30127:5624:5625:5628:…
5737	cytoplasm	192 out of 236 genes, 81.4%	3694 out of 7288 background genes, 50.7%	7.53e-21	ERP2:SCT1:APL3:COQ1:ATP3:ALG14:ALG1:MRPL36:TOS1:FZO1:MBA1:MRPS5:RGD1:FMP51:MRPL37:MRPL27:MRPL32:PER1:SED4:IMG2:SLC1:QRI1:YFH1:SEC31:MRPL11:HEM3:GCS1:YDR061W:DOS2:MRPL1:RSM24:SLY1:MSS116:CPR5:MRPL35:MRP1:VPS52:RIB3:SLF1:EMI2:GRH1:FPR2:QCR7:RIP1:AFG1:BIM1:AFG3:GAL83:RNR1:OXA1:VTC2:MDJ1:RPO41:FET5:EMP47:YFR011C:ERJ5:YMR31:RET2:ERG26:GET1:STT3:YGL039W:DUO1:PYC1:ALG2:MNP1:GUP1:RMD9:SNF4:RSM23:HXK2:YGR…	5856:5783:9277:932:5789:938:17087:795:142:144:5641:324:5823:5750:5751:31307:329:5754:5933:5934:5829:5756:9353:5935:5758:5759:5938:5971:5793:5794:30478:30479:220:43541:1400:5619:1401:1405:5761:5940:5762:5763:5768:30482:5876:43332:42175:776:30122:30123:778:5621:19898:30126:42645:5802:30127:5624:5625:5628:5737:5770:276:5844:5739:5845:5773:5774:5881:31902:5886:5887:131:30678:31588:30134:43529:30136:5…
43229	intracellular organelle	200 out of 236 genes, 84.7%	4021 out of 7288 background genes, 55.2%	2.44e-20	ERP2:SCT1:HAP3:APL3:COQ1:ATP3:ALG14:ALG1:MRPL36:TFC1:TOS1:FZO1:MBA1:MRPS5:SRB6:RGD1:FMP51:MRPL37:MRPL27:MRPL32:PER1:HCM1:SED4:IMG2:MCD1:CDC7:QRI1:YFH1:SEC31:MRPL11:HEM3:GCS1:YDR061W:MRPL1:RSM24:SLY1:MSS116:CPR5:MRPL35:MRP1:VPS52:RIB3:FPR2:QCR7:RIP1:AFG1:BIM1:AFG3:SPC25:GAL83:GLE2:OXA1:VTC2:SMC1:IES1:MDJ1:RPO41:FET5:EMP47:YFR011C:ERJ5:YMR31:RET2:ERG26:GET1:STT3:DUO1:ALG2:MNP1:GUP1:RMD9:SNF4:RSM23:…	5678:5856:5783:9277:932:5789:16602:790:31011:938:17087:795:142:144:798:5641:324:5643:5823:5750:5751:31307:329:508:509:5754:5933:5934:5829:5756:9353:5935:5685:5758:5759:5938:5793:5794:30478:30479:113:220:43541:118:119:228:1400:5619:1401:16585:16586:1405:5761:5940:5762:5763:5768:30482:5876:43332:16514:42175:30014:123:776:30122:778:5621:127:19898:30126:42645:5802:30127:5624:5625:5628:16592:5662:5737…
43226	organelle	200 out of 236 genes, 84.7%	4022 out of 7288 background genes, 55.2%	2.53e-20	ERP2:SCT1:HAP3:APL3:COQ1:ATP3:ALG14:ALG1:MRPL36:TFC1:TOS1:FZO1:MBA1:MRPS5:SRB6:RGD1:FMP51:MRPL37:MRPL27:MRPL32:PER1:HCM1:SED4:IMG2:MCD1:CDC7:QRI1:YFH1:SEC31:MRPL11:HEM3:GCS1:YDR061W:MRPL1:RSM24:SLY1:MSS116:CPR5:MRPL35:MRP1:VPS52:RIB3:FPR2:QCR7:RIP1:AFG1:BIM1:AFG3:SPC25:GAL83:GLE2:OXA1:VTC2:SMC1:IES1:MDJ1:RPO41:FET5:EMP47:YFR011C:ERJ5:YMR31:RET2:ERG26:GET1:STT3:DUO1:ALG2:MNP1:GUP1:RMD9:SNF4:RSM23:…	5678:5856:5783:9277:932:5789:16602:790:31011:938:17087:795:142:144:798:5641:324:5643:5823:5750:5751:31307:329:508:509:5754:5933:5934:5829:5756:9353:5935:5685:5758:5759:5938:5793:5794:30478:30479:113:220:43541:118:119:228:1400:5619:1401:16585:16586:1405:5761:5940:5762:5763:5768:30482:5876:43332:16514:42175:30014:123:776:30122:778:5621:127:19898:30126:42645:5802:30127:5624:5625:5628:16592:5662:5737…
44422	organelle part	143 out of 236 genes, 60.6%	2270 out of 7288 background genes, 31.1%	6.94e-19	ERP2:HAP3:APL3:ATP3:ALG14:MRPL36:TFC1:FZO1:MBA1:MRPS5:SRB6:RGD1:MRPL37:MRPL27:MRPL32:PER1:SED4:IMG2:MCD1:YFH1:SEC31:MRPL11:GCS1:MRPL1:RSM24:SLY1:MSS116:MRPL35:MRP1:VPS52:RIB3:FPR2:QCR7:RIP1:BIM1:AFG3:SPC25:GAL83:GLE2:OXA1:VTC2:SMC1:IES1:MDJ1:RPO41:FET5:EMP47:YMR31:RET2:ERG26:GET1:STT3:DUO1:MNP1:SNF4:RSM23:YGR012W:MRPL25:TOM20:MRP13:GTR2:MRPS35:PCT1:RSM27:MRPL9:PHB2:MRP4:MAS2:GIC1:SAM35:NAM8:GGA2:…	5678:5856:5783:932:5789:16602:790:31011:938:17087:795:142:144:798:5641:5643:5823:5750:5751:31307:329:508:509:5754:5933:5934:5829:5756:9353:5935:5685:5758:5759:5938:5793:5794:30478:30479:113:220:43541:118:119:228:1400:5619:1401:16585:16586:1405:5761:5940:5762:5763:5768:30482:5876:43332:16514:42175:30014:123:776:30122:778:127:19898:30126:42645:5802:30127:5624:5625:5628:16592:5662:5737:5770:276:5739…
44446	intracellular organelle part	143 out of 236 genes, 60.6%	2270 out of 7288 background genes, 31.1%	6.94e-19	ERP2:HAP3:APL3:ATP3:ALG14:MRPL36:TFC1:FZO1:MBA1:MRPS5:SRB6:RGD1:MRPL37:MRPL27:MRPL32:PER1:SED4:IMG2:MCD1:YFH1:SEC31:MRPL11:GCS1:MRPL1:RSM24:SLY1:MSS116:MRPL35:MRP1:VPS52:RIB3:FPR2:QCR7:RIP1:BIM1:AFG3:SPC25:GAL83:GLE2:OXA1:VTC2:SMC1:IES1:MDJ1:RPO41:FET5:EMP47:YMR31:RET2:ERG26:GET1:STT3:DUO1:MNP1:SNF4:RSM23:YGR012W:MRPL25:TOM20:MRP13:GTR2:MRPS35:PCT1:RSM27:MRPL9:PHB2:MRP4:MAS2:GIC1:SAM35:NAM8:GGA2:…	5678:5856:5783:932:5789:16602:790:31011:938:17087:795:142:144:798:5641:5643:5823:5750:5751:31307:329:508:509:5754:5933:5934:5829:5756:9353:5935:5685:5758:5759:5938:5793:5794:30478:30479:113:220:43541:118:119:228:1400:5619:1401:16585:16586:1405:5761:5940:5762:5763:5768:30482:5876:43332:16514:42175:30014:123:776:30122:778:127:19898:30126:42645:5802:30127:5624:5625:5628:16592:5662:5737:5770:276:5739…
31974	membrane-enclosed lumen	72 out of 236 genes, 30.5%	818 out of 7288 background genes, 11.2%	7.56e-14	HAP3:MRPL36:TFC1:MRPS5:SRB6:MRPL37:MRPL27:MRPL32:IMG2:YFH1:MRPL11:MRPL1:RSM24:MSS116:MRPL35:MRP1:RIB3:GAL83:IES1:RPO41:YMR31:MNP1:SNF4:RSM23:MRPL25:MRP13:MRPS35:RSM27:MRPL9:MRP4:MAS2:MRPL6:TIM44:RSM25:KGD1:MRPL8:MRPL49:SWI3:RSM7:YNK1:MDH1:MRPL31:MRP49:MRPL38:MIA40:MRPL13:RSC4:MRPL20:HIF1:SSQ1:MRPL39:NDI1:MIC17:MRPS17:MRPL24:MRPL33:MRP7:IDH1:ARP5:MRPL22:MRPL19:CAF120:ZIM17:ATP11:RPD3:HTZ1:IDH2:MRP…	5678:16602:790:31011:17087:5641:508:509:5829:9353:5758:5759:118:119:16585:16586:1405:5761:5762:5763:16514:30014:123:127:42645:16592:5737:5739:5886:31588:5634:5742:5743
43233	organelle lumen	72 out of 236 genes, 30.5%	818 out of 7288 background genes, 11.2%	7.56e-14	HAP3:MRPL36:TFC1:MRPS5:SRB6:MRPL37:MRPL27:MRPL32:IMG2:YFH1:MRPL11:MRPL1:RSM24:MSS116:MRPL35:MRP1:RIB3:GAL83:IES1:RPO41:YMR31:MNP1:SNF4:RSM23:MRPL25:MRP13:MRPS35:RSM27:MRPL9:MRP4:MAS2:MRPL6:TIM44:RSM25:KGD1:MRPL8:MRPL49:SWI3:RSM7:YNK1:MDH1:MRPL31:MRP49:MRPL38:MIA40:MRPL13:RSC4:MRPL20:HIF1:SSQ1:MRPL39:NDI1:MIC17:MRPS17:MRPL24:MRPL33:MRP7:IDH1:ARP5:MRPL22:MRPL19:CAF120:ZIM17:ATP11:RPD3:HTZ1:IDH2:MRP…	5678:16602:790:31011:17087:5641:508:509:5829:9353:5758:5759:118:119:16585:16586:1405:5761:5762:5763:16514:30014:123:127:42645:16592:5737:5739:5886:31588:5634:5742:5743
43234	protein complex	92 out of 236 genes, 39.0%	1291 out of 7288 background genes, 17.7%	1.01e-12	HAP3:APL3:ATP3:ALG14:MRPL36:TFC1:MRPS5:SRB6:MRPL37:MRPL27:MRPL32:IMG2:MCD1:CDC7:MRPL11:MRPL1:RSM24:UBC1:MRPL35:MRP1:VPS52:QCR7:RIP1:AFG3:SPC25:GAL83:RNR1:GLE2:SMC1:IES1:YMR31:GET1:STT3:DUO1:SNF4:RSM23:MRPL25:TOM20:MRP13:MRPS35:RSM27:MRPL9:APL6:MRP4:MAS2:SAM35:NAM8:MRPL6:TIM44:IRR1:RSM25:KGD1:DSN1:MRPL8:MRPL49:PAM16:LSM1:TIM17:RFA3:SWI3:RSM7:ATP2:ABF1:MRPL31:MRP49:MRPL38:MIA40:MRPL13:RSC4:PAM17:MR…	5678:5783:932:16602:790:31011:938:17087:798:5641:502:5643:5750:5751:31307:508:509:5754:5756:9353:5758:5685:5759:5971:5794:113:220:43541:118:119:1401:16585:16586:1405:5762:5763:5876:16514:42175:30014:123:776:30122:30123:778:127:42645:19898:5624:5625:16592:5662:5737:5770:31431:276:5739:5845:922:818:5886:780:781:30678:788:31588:43529:243:42729:8250:5634:5741:16021:5742:5816:5743:5744:5745:5819:31262…
15934	large ribosomal subunit	25 out of 236 genes, 10.6%	142 out of 7288 background genes, 1.9%	7.06e-10	MRPL36:MRPL37:MRPL27:MRPL32:IMG2:MRPL11:MRPL1:MRPL35:MRPL25:MRPL9:MRPL6:MRPL8:MRPL49:MRPL31:MRP49:MRPL38:MRPL13:MRPL20:MRPL39:MRPL24:MRPL33:MRP7:MRPL22:MRPL19:MRPL23	5762:5739
5840	ribosome	39 out of 236 genes, 16.5%	357 out of 7288 background genes, 4.9%	3.04e-09	MRPL36:MRPS5:MRPL37:MRPL27:MRPL32:IMG2:MRPL11:MRPL1:RSM24:MRPL35:MRP1:YMR31:MNP1:RSM23:MRPL25:MRP13:MRPS35:RSM27:MRPL9:MRP4:MRPL6:RSM25:MRPL8:MRPL49:RSM7:MRPL31:MRP49:MRPL38:MRPL13:MRPL20:MRPL39:MRPS17:MRPL24:MRPL33:MRP7:MRPL22:MRPL19:MRPL23:PET123	5761:5762:5763:5739
314	organellar small ribosomal subunit	13 out of 236 genes, 5.5%	34 out of 7288 background genes, 0.5%	4.45e-09	MRPS5:RSM24:MRP1:YMR31:RSM23:MRP13:MRPS35:RSM27:MRP4:RSM25:RSM7:MRPS17:PET123	5763:5739
5763	mitochondrial small ribosomal subunit	13 out of 236 genes, 5.5%	34 out of 7288 background genes, 0.5%	4.45e-09	MRPS5:RSM24:MRP1:YMR31:RSM23:MRP13:MRPS35:RSM27:MRP4:RSM25:RSM7:MRPS17:PET123	5763:5739
32991	macromolecular complex	96 out of 236 genes, 40.7%	1626 out of 7288 background genes, 22.3%	2.67e-08	HAP3:APL3:ATP3:ALG14:MRPL36:TFC1:MRPS5:SRB6:MRPL37:MRPL27:MRPL32:IMG2:MCD1:CDC7:MRPL11:MRPL1:RSM24:UBC1:MRPL35:MRP1:VPS52:SLF1:QCR7:RIP1:AFG3:SPC25:GAL83:RNR1:GLE2:SMC1:IES1:YMR31:GET1:STT3:DUO1:MNP1:SNF4:RSM23:MRPL25:TOM20:MRP13:MRPS35:PBP1:RSM27:MRPL9:APL6:MRP4:MAS2:SAM35:NAM8:MRPL6:TIM44:IRR1:RSM25:KGD1:DSN1:MRPL8:MRPL49:PAM16:LSM1:TIM17:RFA3:SWI3:RSM7:ATP2:ABF1:MRPL31:MRP49:MRPL38:MIA40:MRPL1…	5678:5783:932:16602:790:31011:938:17087:798:5641:502:5643:5750:5751:31307:508:509:5754:5756:9353:5758:5685:5759:5971:5794:113:220:43541:118:119:1401:16585:16586:1405:5761:5762:5763:5876:16514:42175:30014:123:776:30122:30123:778:127:42645:19898:5624:5625:16592:5662:5737:5770:31431:276:5844:5739:5845:30529:922:818:5886:780:781:30678:788:31588:43529:243:42729:8250:5634:5741:16021:5742:5816:5743:5744…
43228	non-membrane-bound organelle	63 out of 236 genes, 26.7%	1025 out of 7288 background genes, 14.1%	4.47e-05	MRPL36:MRPS5:RGD1:MRPL37:MRPL27:MRPL32:IMG2:MCD1:MRPL11:GCS1:MRPL1:RSM24:MRPL35:MRP1:BIM1:SPC25:SMC1:YMR31:DUO1:MNP1:RSM23:MRPL25:MRP13:MRPS35:RSM27:MRPL9:MRP4:GIC1:MRPL6:IRR1:RSM25:PRK1:TPM2:AXL2:DSN1:MRPL8:MRPL49:RFA3:CDC11:RSM7:MIF2:ABF1:MRPL31:MRP49:MRPL38:MRPL13:MRPL20:STU2:NBP1:MRPL39:MRPS17:MRPL24:MRPL33:MRP7:TOP2:MRPL22:MRPL19:HTZ1:MSH2:MRPL23:PET123:SPC29:HHO1	5678:5856:790:795:142:144:798:5823:5933:5934:5935:5938:5793:30478:30479:113:228:1400:5619:5761:5940:5762:5763:5768:30482:5876:43332:776:778:5802:5628:5662:5739:5881:922:818:5887:780:781:131:788:42729:5634:5816:5819:31262
43232	intracellular non-membrane-bound organelle	63 out of 236 genes, 26.7%	1025 out of 7288 background genes, 14.1%	4.47e-05	MRPL36:MRPS5:RGD1:MRPL37:MRPL27:MRPL32:IMG2:MCD1:MRPL11:GCS1:MRPL1:RSM24:MRPL35:MRP1:BIM1:SPC25:SMC1:YMR31:DUO1:MNP1:RSM23:MRPL25:MRP13:MRPS35:RSM27:MRPL9:MRP4:GIC1:MRPL6:IRR1:RSM25:PRK1:TPM2:AXL2:DSN1:MRPL8:MRPL49:RFA3:CDC11:RSM7:MIF2:ABF1:MRPL31:MRP49:MRPL38:MRPL13:MRPL20:STU2:NBP1:MRPL39:MRPS17:MRPL24:MRPL33:MRP7:TOP2:MRPL22:MRPL19:HTZ1:MSH2:MRPL23:PET123:SPC29:HHO1	5678:5856:790:795:142:144:798:5823:5933:5934:5935:5938:5793:30478:30479:113:228:1400:5619:5761:5940:5762:5763:5768:30482:5876:43332:776:778:5802:5628:5662:5739:5881:922:818:5887:780:781:131:788:42729:5634:5816:5819:31262
30529	ribonucleoprotein complex	44 out of 236 genes, 18.6%	618 out of 7288 background genes, 8.5%	0.0001	MRPL36:MRPS5:MRPL37:MRPL27:MRPL32:IMG2:MRPL11:MRPL1:RSM24:MRPL35:MRP1:SLF1:YMR31:MNP1:RSM23:MRPL25:MRP13:MRPS35:PBP1:RSM27:MRPL9:MRP4:NAM8:MRPL6:RSM25:MRPL8:MRPL49:RSM7:MRPL31:MRP49:MRPL38:MRPL13:MRPL20:MRPL39:RPM2:MRPS17:MRPL24:MRPL33:MRP7:MRPL22:MRPL19:MRPL23:PET123:BFR1	932:5685:5761:5762:5763:42175:5737:5844:5739:30529:30678:243:5634
44455	mitochondrial membrane part	15 out of 236 genes, 6.4%	98 out of 7288 background genes, 1.3%	0.00013	ATP3:QCR7:RIP1:AFG3:TOM20:SAM35:TIM44:PAM16:TIM17:ATP2:MIA40:PAM17:ATP14:COX5A:MGE1	5750:5751:31307:5754:5756:5758:5759:1401:1405:19898:5625:276:5739:5741:16021:5742:5743:5744:5745
5740	mitochondrial envelope	27 out of 236 genes, 11.4%	288 out of 7288 background genes, 4.0%	0.00014	ATP3:FZO1:MBA1:RIB3:QCR7:RIP1:AFG3:OXA1:MDJ1:YGR012W:TOM20:PHB2:SAM35:TIM44:PAM16:TIM17:MIR1:ATP2:YNK1:MIA40:PAM17:ATP14:MIC17:COX5A:MGE1:MDL2:ISA2	5750:5751:31307:5754:5829:5756:5758:5759:1401:1405:19898:5625:5737:276:5739:5634:5740:5741:16021:5742:5743:5744:5745
5743	mitochondrial inner membrane	19 out of 236 genes, 8.1%	161 out of 7288 background genes, 2.2%	0.00026	ATP3:FZO1:MBA1:QCR7:RIP1:AFG3:OXA1:MDJ1:PHB2:TIM44:PAM16:TIM17:ATP2:MIA40:PAM17:ATP14:COX5A:MGE1:MDL2	5750:5751:5754:5756:5758:5759:1405:5625:276:5739:5741:16021:5742:5743:5744:5745
19866	organelle inner membrane	19 out of 236 genes, 8.1%	171 out of 7288 background genes, 2.3%	0.00066	ATP3:FZO1:MBA1:QCR7:RIP1:AFG3:OXA1:MDJ1:PHB2:TIM44:PAM16:TIM17:ATP2:MIA40:PAM17:ATP14:COX5A:MGE1:MDL2	5750:5751:5754:5756:5758:5759:1405:5625:276:5739:5741:16021:5742:5743:5744:5745
31967	organelle envelope	31 out of 236 genes, 13.1%	392 out of 7288 background genes, 5.4%	0.00083	ATP3:FZO1:MBA1:RIB3:QCR7:RIP1:AFG3:GAL83:GLE2:OXA1:MDJ1:SNF4:YGR012W:TOM20:PCT1:PHB2:SAM35:TIM44:PAM16:TIM17:MIR1:ATP2:YNK1:MIA40:PAM17:ATP14:MIC17:COX5A:MGE1:MDL2:ISA2	5641:5643:5750:5751:31307:5754:5829:5756:5758:5759:5794:1401:1405:19898:5625:5737:276:5739:5886:31588:5634:5740:5635:5741:16021:5742:5743:5744:5745
31975	envelope	31 out of 236 genes, 13.1%	392 out of 7288 background genes, 5.4%	0.00083	ATP3:FZO1:MBA1:RIB3:QCR7:RIP1:AFG3:GAL83:GLE2:OXA1:MDJ1:SNF4:YGR012W:TOM20:PCT1:PHB2:SAM35:TIM44:PAM16:TIM17:MIR1:ATP2:YNK1:MIA40:PAM17:ATP14:MIC17:COX5A:MGE1:MDL2:ISA2	5641:5643:5750:5751:31307:5754:5829:5756:5758:5759:5794:1401:1405:19898:5625:5737:276:5739:5886:31588:5634:5740:5635:5741:16021:5742:5743:5744:5745
16020	membrane	61 out of 236 genes, 25.8%	1080 out of 7288 background genes, 14.8%	0.00139	APL3:ATP3:ALG14:ALG1:FZO1:MBA1:PER1:SED4:ERP3:SEC31:LPP1:FPR2:QCR7:RIP1:AFG3:GAL83:GLE2:OXA1:VTC2:MDJ1:FET5:RET2:ERG26:STT3:GUP1:SNF4:YGR012W:MSB2:TOM20:GTR2:PCT1:PHB2:APL6:SAM35:CTR2:TIM44:AXL2:LAS21:GWT1:PAM16:TIM17:ELO1:CDC11:ATP2:YPK1:MIA40:PAM17:RAX2:SEC22:ATP14:VID22:VAC14:STV1:FET3:SWP1:COX5A:SEC21:BFR1:MGE1:MDL2:SRO7	5783:5789:144:5641:5643:5750:5751:31307:329:5754:5829:5756:5935:5758:5759:5794:220:43541:1400:5619:1401:1405:5940:5768:42175:30122:30123:5621:19898:30126:30127:5624:5625:5628:5737:5770:5844:276:5739:5773:5774:30529:31902:5886:5887:31588:8250:5634:5635:16020:5741:5742:16021:5743:5744:5745:30427:30176
31090	organelle membrane	41 out of 236 genes, 17.4%	619 out of 7288 background genes, 8.5%	0.00179	APL3:ATP3:ALG14:FZO1:MBA1:PER1:SED4:SEC31:FPR2:QCR7:RIP1:AFG3:GLE2:OXA1:VTC2:MDJ1:FET5:RET2:ERG26:STT3:YGR012W:TOM20:GTR2:PHB2:SAM35:CTR2:TIM44:LAS21:PAM16:TIM17:ATP2:MIA40:PAM17:ATP14:VAC14:STV1:SWP1:COX5A:SEC21:MGE1:MDL2	5783:5789:5643:5750:5751:31307:329:5754:5756:5758:5759:5794:220:43541:1401:1405:5768:42175:30122:19898:30126:30127:5624:5625:5737:5770:276:5739:5773:5774:31902:5887:5634:8250:5741:16021:5742:5743:5744:5745:30176
5744	mitochondrial inner membrane presequence translocase complex	5 out of 236 genes, 2.1%	11 out of 7288 background genes, 0.2%	0.0038	TIM44:PAM16:TIM17:PAM17:MGE1	5759:1405:5739:16021:5744
15935	small ribosomal subunit	13 out of 236 genes, 5.5%	98 out of 7288 background genes, 1.3%	0.00407	MRPS5:RSM24:MRP1:YMR31:RSM23:MRP13:MRPS35:RSM27:MRP4:RSM25:RSM7:MRPS17:PET123	5763:5739
31966	mitochondrial membrane	22 out of 236 genes, 9.3%	247 out of 7288 background genes, 3.4%	0.00408	ATP3:FZO1:MBA1:QCR7:RIP1:AFG3:OXA1:MDJ1:YGR012W:TOM20:PHB2:SAM35:TIM44:PAM16:TIM17:ATP2:MIA40:PAM17:ATP14:COX5A:MGE1:MDL2	5750:5751:31307:5754:5756:5758:5759:1401:1405:19898:5625:276:5739:5741:16021:5742:5743:5744:5745
44425	membrane part	39 out of 236 genes, 16.5%	614 out of 7288 background genes, 8.4%	0.00826	APL3:ATP3:ALG14:ALG1:FZO1:SED4:ERP3:SEC31:FPR2:QCR7:RIP1:AFG3:GLE2:RET2:ERG26:STT3:YGR012W:MSB2:TOM20:APL6:SAM35:TIM44:AXL2:LAS21:GWT1:PAM16:TIM17:ATP2:MIA40:PAM17:SEC22:ATP14:VID22:STV1:SWP1:COX5A:SEC21:BFR1:MGE1	5783:5789:5643:5750:5751:31307:5754:5756:5935:5758:5759:5794:220:43541:1401:1405:5940:5768:42175:30122:30123:19898:30126:30127:5624:5625:5770:5844:276:5739:30529:5887:8250:16020:5741:5742:16021:5743:5744:5745:30427:30176
1405	presequence translocase-associated import motor	4 out of 236 genes, 1.7%	7 out of 7288 background genes, 0.1%	0.00983	TIM44:PAM16:PAM17:MGE1	5759:1405:5739:16021:5744
Cluster 4
Genes
YDR127W	ARO1	YDR127W
YAL041W	CDC24	YAL041W
YOR039W	CKB2	YOR039W
YMR238W	DFG5	YMR238W
YOR236W	DFR1	YOR236W
YHR007C	ERG11	YHR007C
YGR060W	ERG25	YGR060W
YMR015C	ERG5	YMR015C
YKL173W	SNU114	YKL173W
YCR021C	HSP30	YCR021C
YHR187W	IKI1	YHR187W
YNL103W	MET4	YNL103W
YML031W	NDC1	YML031W
YJR112W	NNF1	YJR112W
YMR205C	PFK2	YMR205C
YER099C	PRS2	YER099C
YAL043C	PTA1	YAL043C
YAL038W	CDC19	YAL038W
YOR167C	RPS28A	YOR167C
YHR030C	SLT2	YHR030C
YPL210C	SRP72	YPL210C
YPL011C	TAF3	YPL011C
YER090W	TRP2	YER090W
YKL211C	TRP3	YKL211C
YBR095C	RXT2	YBR095C
YBR265W	TSC10	YBR265W
YCL010C	SGF29	YCL010C
YDR531W	non	YDR531W
YIL117C	PRM5	YIL117C
YIL135C	VHS2	YIL135C
YJL065C	DLS1	YJL065C
YLL028W	TPO1	YLL028W
YLR440C	SEC39	YLR440C
YNL158W	PGA1	YNL158W
YNL224C	SQS1	YNL224C
YNL281W	HCH1	YNL281W
YNR039C	ZRG17	YNR039C
YOR291W	non	YOR291W
YBR054W	YRO2	YBR054W
GO Enrichments
Process
GOID	GO_term	Cluster frequency	Background frequency	P-value	Gene(s) annotated to the term	Directly Annotated GOID List
9073	aromatic amino acid family biosynthetic process	4 out of 39 genes, 10.3%	16 out of 7288 background genes, 0.2%	0.00044	ARO1:TRP2:PRS2:TRP3	6189:6166:6207:9073:105:162
19438	aromatic compound biosynthetic process	4 out of 39 genes, 10.3%	17 out of 7288 background genes, 0.2%	0.00057	ARO1:TRP2:PRS2:TRP3	6189:6166:6207:9073:105:162
9072	aromatic amino acid family metabolic process	4 out of 39 genes, 10.3%	21 out of 7288 background genes, 0.3%	0.00143	ARO1:TRP2:PRS2:TRP3	6189:6166:6207:9073:105:162
6725	aromatic compound metabolic process	5 out of 39 genes, 12.8%	56 out of 7288 background genes, 0.8%	0.00384	ARO1:TRP2:PRS2:TRP3:DFR1	6189:6166:6207:9073:105:162:6760
162	tryptophan biosynthetic process	3 out of 39 genes, 7.7%	10 out of 7288 background genes, 0.1%	0.00604	TRP2:PRS2:TRP3	6189:6166:6207:105:162
42430	indole and derivative metabolic process	3 out of 39 genes, 7.7%	10 out of 7288 background genes, 0.1%	0.00604	TRP2:PRS2:TRP3	6189:6166:6207:105:162
42434	indole derivative metabolic process	3 out of 39 genes, 7.7%	10 out of 7288 background genes, 0.1%	0.00604	TRP2:PRS2:TRP3	6189:6166:6207:105:162
42435	indole derivative biosynthetic process	3 out of 39 genes, 7.7%	10 out of 7288 background genes, 0.1%	0.00604	TRP2:PRS2:TRP3	6189:6166:6207:105:162
46219	indolalkylamine biosynthetic process	3 out of 39 genes, 7.7%	10 out of 7288 background genes, 0.1%	0.00604	TRP2:PRS2:TRP3	6189:6166:6207:105:162
6568	tryptophan metabolic process	3 out of 39 genes, 7.7%	10 out of 7288 background genes, 0.1%	0.00604	TRP2:PRS2:TRP3	6189:6166:6207:105:162
6586	indolalkylamine metabolic process	3 out of 39 genes, 7.7%	10 out of 7288 background genes, 0.1%	0.00604	TRP2:PRS2:TRP3	6189:6166:6207:105:162
9096	aromatic amino acid family biosynthetic process, anthranilate pathway	3 out of 39 genes, 7.7%	10 out of 7288 background genes, 0.1%	0.00604	TRP2:PRS2:TRP3	6189:6166:6207:105:162
Function
GOID	GO_term	Cluster frequency	Background frequency	P-value	Gene(s) annotated to the term	Directly Annotated GOID List
4049	anthranilate synthase activity	2 out of 39 genes, 5.1%	2 out of 7288 background genes, 0.0%	0.00256	TRP2:TRP3	4425:4049
Component
GOID	GO_term	Cluster frequency	Background frequency	P-value	Gene(s) annotated to the term	Directly Annotated GOID List
44464	cell part	39 out of 39 genes, 100.0%	5495 out of 7288 background genes, 75.4%	0.00188	CDC19:CDC24:PTA1:YRO2:RXT2:TSC10:SGF29:HSP30:ARO1:YDR531W:TRP2:PRS2:ERG25:ERG11:SLT2:IKI1:PRM5:VHS2:DLS1:NNF1:SNU114:TRP3:TPO1:SEC39:NDC1:ERG5:PFK2:DFG5:MET4:PGA1:SQS1:HCH1:ZRG17:CKB2:RPS28A:DFR1:YOR291W:TAF3:SRP72	5945:5783:5786:46658:5789:43332:8023:776:124:5643:508:5737:5843:5682:5739:5933:8623:5829:5950:5934:5935:5669:5847:5774:5849:922:5956:818:5886:131:5634:5635:16020:5741:16021:5816:46540
5950	anthranilate synthase complex	2 out of 39 genes, 5.1%	2 out of 7288 background genes, 0.0%	0.00329	TRP2:TRP3	5737:5950
Cluster 5
Genes
YDR448W	ADA2	YDR448W
YGL130W	CEG1	YGL130W
YGR267C	FOL2	YGR267C
YHR005C	GPA1	YHR005C
YIL115C	NUP159	YIL115C
YGR240C	PFK1	YGR240C
YGR135W	PRE9	YGR135W
YGR075C	PRP38	YGR075C
YOR265W	RBL2	YOR265W
YGR074W	SMD1	YGR074W
YIL144W	TID3	YIL144W
YGR105W	VMA21	YGR105W
YKL041W	VPS24	YKL041W
YGL095C	VPS45	YGL095C
YBR254C	TRS20	YBR254C
YDR056C	non	YDR056C
YGL157W	non	YGL157W
YGL223C	COG1	YGL223C
YGL231C	non	YGL231C
YGR002C	SWC4	YGR002C
YGR026W	non	YGR026W
YGR106C	non	YGR106C
YGR275W	RTT102	YGR275W
YHR111W	UBA4	YHR111W
YHR122W	non	YHR122W
YHR162W	non	YHR162W
YHR192W	non	YHR192W
YIL040W	APQ12	YIL040W
YPR107C	YTH1	YPR107C
NO Enrichments
Cluster 6
Genes
YNL048W	ALG11	YNL048W
YNL219C	ALG9	YNL219C
YBR211C	AME1	YBR211C
YPL115C	BEM3	YPL115C
YPR025C	CCL1	YPR025C
YDL165W	CDC36	YDL165W
YBR202W	CDC47	YBR202W
YPR019W	CDC54	YPR019W
YER164W	CHD1	YER164W
YOR171C	LCB4	YOR171C
YGL016W	KAP122	YGL016W
YML016C	PPZ1	YML016C
YBR237W	PRP5	YBR237W
YNL216W	RAP1	YNL216W
YJR068W	RFC2	YJR068W
YIL143C	SSL2	YIL143C
YPL048W	CAM1	YPL048W
YBR287W	ZSP1	YBR287W
YCL028W	RNQ1	YCL028W
YDR391C	non	YDR391C
YGR156W	PTI1	YGR156W
YKL088W	non	YKL088W
YKR007W	MEH1	YKR007W
YKR100C	SKG1	YKR100C
YLL029W	non	YLL029W
YMR200W	ROT1	YMR200W
YOR197W	MCA1	YOR197W
YLR262C	YPT6	YLR262C
Enrichments
Function
GOID	GO_term	Cluster frequency	Background frequency	P-value	Gene(s) annotated to the term	Directly Annotated GOID List
5622	intracellular	28 out of 28 genes, 100.0%	5087 out of 7288 background genes, 69.8%	0.00502	CDC47:AME1:PRP5:ZSP1:RNQ1:CDC36:YDR391C:CHD1:KAP122:PTI1:SSL2:RFC2:YKL088W:MEH1:SKG1:YLL029W:YPT6:PPZ1:ROT1:ALG11:RAP1:ALG9:LCB4:MCA1:CAM1:BEM3:CDC54:CCL1	5783:5789:8023:46695:30015:776:124:5622:19897:42555:5624:5625:5643:329:5663:5737:5681:5933:5739:5934:5829:5847:5794:817:31902:5886:112:783:131:5634:5724:5830:16020:5816:5656:5675
Component
GOID	GO_term	Cluster frequency	Background frequency	P-value	Gene(s) annotated to the term	Directly Annotated GOID List
5622	intracellular	28 out of 28 genes, 100.0%	5087 out of 7288 background genes, 69.8%	0.00502	CDC47:AME1:PRP5:ZSP1:RNQ1:CDC36:YDR391C:CHD1:KAP122:PTI1:SSL2:RFC2:YKL088W:MEH1:SKG1:YLL029W:YPT6:PPZ1:ROT1:ALG11:RAP1:ALG9:LCB4:MCA1:CAM1:BEM3:CDC54:CCL1	5783:5789:8023:46695:30015:776:124:5622:19897:42555:5624:5625:5643:329:5663:5737:5681:5933:5739:5934:5829:5847:5794:817:31902:5886:112:783:131:5634:5724:5830:16020:5816:5656:5675
Cluster 7
Genes
YAL021C	CCR4	YAL021C
YDR301W	CFT1	YDR301W
YLR433C	CNA1	YLR433C
YNR030W	ALG12	YNR030W
YMR161W	HLJ1	YMR161W
YJL146W	IDS2	YJL146W
YER105C	NUP157	YER105C
YJL002C	OST1	YJL002C
YCR077C	PAT1	YCR077C
YDL065C	PEX19	YDL065C
YMR235C	RNA1	YMR235C
YJL121C	RPE1	YJL121C
YCR009C	RVS161	YCR009C
YER120W	SCS2	YER120W
YKL080W	VMA5	YKL080W
YEL002C	WBP1	YEL002C
YDL224C	WHI4	YDL224C
YBL051C	PIN4	YBL051C
YDR205W	MSC2	YDR205W
YFR010W	UBP6	YFR010W
YJL178C	ATG27	YJL178C
YJL207C	LAA1	YJL207C
YJR013W	GPI14	YJR013W
YNL206C	RTT106	YNL206C
Enrichments
Process
GOID	GO_term	Cluster frequency	Background frequency	P-value	Gene(s) annotated to the term	Directly Annotated GOID List
9987	cellular process	24 out of 24 genes, 100.0%	4701 out of 7288 background genes, 64.5%	0.00835	CCR4:PIN4:RVS161:PAT1:PEX19:WHI4:MSC2:CFT1:WBP1:NUP157:SCS2:UBP6:OST1:RPE1:IDS2:ATG27:LAA1:GPI14:VMA5:CNA1:HLJ1:RNA1:RTT106:ALG12	54:6020:288:289:30466:6873:754:77:6404:45046:45047:6897:6406:7047:6407:6408:6409:7049:6606:6607:6608:6357:6446:6609:6625:30433:16579:7089:290:6378:31505:16050:6379:6914:6486:6487:6488:16072:42147:6970:6882:86:7031:7121:7035:8104:7126:6610:6506:6611:7059:42493:6999:6348:335:6098:18279:6457:6368:8361:6369
Function
GOID	GO_term	Cluster frequency	Background frequency	P-value	Gene(s) annotated to the term	Directly Annotated GOID List
16758	transferase activity, transferring hexosyl groups	4 out of 24 genes, 16.7%	77 out of 7288 background genes, 1.1%	0.0075	WBP1:OST1:GPI14:ALG12	30:9:4579
Component
GOID	GO_term	Cluster frequency	Background frequency	P-value	Gene(s) annotated to the term	Directly Annotated GOID List
44425	membrane part	9 out of 24 genes, 37.5%	614 out of 7288 background genes, 8.4%	0.00979	RVS161:WBP1:NUP157:SCS2:OST1:LAA1:GPI14:VMA5:HLJ1	5783:5937:30136:8250:5643:5635:45121:5789:16021:329:5840:30479:30121:221
5783	endoplasmic reticulum	7 out of 24 genes, 29.2%	344 out of 7288 background genes, 4.7%	0.00998	MSC2:WBP1:SCS2:OST1:GPI14:HLJ1:ALG12	5783:8250:5634:5635:5789:16020:16021
Cluster 8
Genes
YPL195W	APL5	YPL195W
YOR094W	ARF3	YOR094W
YER155C	BEM2	YER155C
YBR290W	BSD2	YBR290W
YKL049C	CSE4	YKL049C
YOL149W	DCP1	YOL149W
YNL236W	SIN4	YNL236W
YER022W	SRB4	YER022W
YDR086C	SSS1	YDR086C
YGL145W	TIP20	YGL145W
YBL046W	PSY4	YBL046W
YBR216C	YBP1	YBR216C
YER123W	YCK3	YER123W
YCL045C	non	YCL045C
YDR372C	VPS74	YDR372C
YDR373W	FRQ1	YDR373W
YDR434W	GPI17	YDR434W
YDR458C	HEH2	YDR458C
YGL110C	CUE3	YGL110C
YKR088C	TVP38	YKR088C
YMR192W	GYL1	YMR192W
YMR255W	GFD1	YMR255W
YOR016C	ERP4	YOR016C
YPR171W	BSP1	YPR171W
Enrichments
Process
GOID	GO_term	Cluster frequency	Background frequency	P-value	Gene(s) annotated to the term	Directly Annotated GOID List
51641	cellular localization	10 out of 24 genes, 41.7%	623 out of 7288 background genes, 8.5%	0.00224	BSD2:SSS1:VPS74:TIP20:GYL1:GFD1:ERP4:ARF3:APL5:BSP1	6406:6511:30036:6620:31204:6623:30001:6616:6890:9306:16192:6886:45045:17157:48228:6896:6888

## Sheet: Sheet2
Bi - Clusters
Bi-Cluster 1	score = 455			Mean pattern, and conditions
YNL141W	AAH1	YNL141W
YGL119W	ABC1	YGL119W
YDR448W	ADA2	YDR448W
YMR300C	ADE4	YMR300C
YBL069W	AST1	YBL069W
YJR032W	CPR7	YJR032W
YOL007C	CSI2	YOL007C
YPR124W	CTR1	YPR124W
YCR054C	CTR86	YCR054C
YOL145C	CTR9	YOL145C
YGR036C	CAX4	YGR036C
YGL078C	DBP3	YGL078C
YFL001W	DEG1	YFL001W
YGL061C	DUO1	YGL061C
YJL201W	ECM25	YJL201W
YJL168C	SET2	YJL168C
YMR319C	FET4	YMR319C
YHR005C	GPA1	YHR005C
YOL059W	GPD2	YOL059W
YOL056W	GPM3	YOL056W
YKR084C	HBS1	YKR084C
YJR147W	HMS2	YJR147W
YGL194C	HOS2	YGL194C
YHR187W	IKI1	YHR187W
YPL263C	KEL3	YPL263C
YHL003C	LAG1	YHL003C
YDR503C	LPP1	YDR503C
YKL021C	MAK11	YKL021C
YDL003W	MCD1	YDL003W
YNL328C	MDJ2	YNL328C
YOR274W	MOD5	YOR274W
YOL090W	MSH2	YOL090W
YLR457C	NBP1	YLR457C
YPL124W	SPC29	YPL124W
YDL167C	NRP1	YDL167C
YGR159C	NSR1	YGR159C
YER149C	PEA2	YER149C
YJL179W	PFD1	YJL179W
YEL055C	POL5	YEL055C
YIL095W	PRK1	YIL095W
YGR075C	PRP38	YGR075C
YDR257C	SET7	YDR257C
YJR063W	RPA12	YJR063W
YOR340C	RPA43	YOR340C
YGR152C	RSR1	YGR152C
YJL098W	SAP185	YJL098W
YIL084C	SDS3	YIL084C
YHR136C	SPL2	YHR136C
YIL140W	AXL2	YIL140W
YLR452C	SST2	YLR452C
YFL026W	STE2	YFL026W
YGL169W	SUA5	YGL169W
YDR161W	non	YDR161W
YIL144W	TID3	YIL144W
YOL115W	PAP2	YOL115W
YEL040W	UTR2	YEL040W
YBR069C	TAT1	YBR069C
YML097C	VPS9	YML097C
YAL019W	FUN30	YAL019W
YBL055C	non	YBL055C
YBR028C	non	YBR028C
YCR027C	RHB1	YCR027C
YCR043C	non	YCR043C
YCR057C	PWP2	YCR057C
YDR049W	non	YDR049W
YDR083W	RRP8	YDR083W
YDR361C	BCP1	YDR361C
YDR398W	UTP5	YDR398W
YDR400W	URH1	YDR400W
YDR449C	UTP6	YDR449C
YDR527W	RBA50	YDR527W
YDR528W	HLR1	YDR528W
YEL048C	non	YEL048C
YER049W	TPA1	YER049W
YFL023W	BUD27	YFL023W
YFR048W	RMD8	YFR048W
YGL157W	non	YGL157W
YGL246C	RAI1	YGL246C
YGR081C	SLX9	YGR081C
YGR103W	NOP7	YGR103W
YGR128C	UTP8	YGR128C
YGR173W	RBG2	YGR173W
YGR251W	non	YGR251W
YHR046C	INM1	YHR046C
YHR049W	FSH1	YHR049W
YHR073W	OSH3	YHR073W
YHR085W	IPI1	YHR085W
YHR149C	SKG6	YHR149C
YHR196W	UTP9	YHR196W
YHR197W	RIX1	YHR197W
YIL091C	non	YIL091C
YIL104C	SHQ1	YIL104C
YIL145C	PAN6	YIL145C
YJL010C	NOP9	YJL010C
YJL212C	OPT1	YJL212C
YJR097W	JJJ3	YJR097W
YKR060W	UTP30	YKR060W
YKR079C	TRZ1	YKR079C
YLL038C	ENT4	YLL038C
YLR002C	NOC3	YLR002C
YLR022C	SDO1	YLR022C
YLR073C	non	YLR073C
YLR221C	RSA3	YLR221C
YLR222C	UTP13	YLR222C
YLR405W	DUS4	YLR405W
YLR413W	non	YLR413W
YLR435W	TSR2	YLR435W
YML005W	TRM12	YML005W
YML080W	DUS1	YML080W
YML093W	UTP14	YML093W
YML096W	non	YML096W
YMR048W	CSM3	YMR048W
YMR093W	UTP15	YMR093W
YMR192W	GYL1	YMR192W
YMR259C	non	YMR259C
YNL065W	AQR1	YNL065W
YNL166C	BNI5	YNL166C
YNL175C	NOP13	YNL175C
YNL224C	SQS1	YNL224C
YNL245C	CWC25	YNL245C
YNL313C	non	YNL313C
YNR014W	non	YNR014W
YOL041C	NOP12	YOL041C
YOL080C	REX4	YOL080C
YOL124C	TRM11	YOL124C
YOL144W	NOP8	YOL144W
YOR206W	NOC2	YOR206W
YPL126W	NAN1	YPL126W
YPR156C	TPO3	YPR156C
YPR171W	BSP1	YPR171W
YIR026C	YVH1	YIR026C
GO Enrichments
Process
GOID	GO_term	Cluster frequency	Background frequency	P-value	Gene(s) annotated to the term	Directly Annotated GOID List
42254	ribosome biogenesis and assembly	38 out of 131 genes, 29.0%	330 out of 7288 background genes, 4.5%	1.66e-18	PWP2:NRP1:RRP8:YDR161W:BCP1:UTP5:UTP6:TPA1:DBP3:RAI1:SLX9:NOP7:UTP8:NSR1:YGR251W:IPI1:UTP9:RIX1:YVH1:NOP9:RPA12:MAK11:UTP30:NOC3:SDO1:RSA3:UTP13:TSR2:UTP14:UTP15:AAH1:NOP13:REX4:TRM11:NOP8:NOC2:RPA43:NAN1	30437:723:54:910:16070:55:288:30490:30468:42254:42255:5977:30488:42273:30489:6402:30846:6146:7126:6270:6360:7049:6611:6451:6364:6365:27:28:8283
22613	ribonucleoprotein complex biogenesis and assembly	38 out of 131 genes, 29.0%	400 out of 7288 background genes, 5.5%	1.48e-15	PWP2:NRP1:RRP8:YDR161W:BCP1:UTP5:UTP6:TPA1:DBP3:RAI1:SLX9:NOP7:UTP8:NSR1:YGR251W:IPI1:UTP9:RIX1:YVH1:NOP9:RPA12:MAK11:UTP30:NOC3:SDO1:RSA3:UTP13:TSR2:UTP14:UTP15:AAH1:NOP13:REX4:TRM11:NOP8:NOC2:RPA43:NAN1	30437:723:54:910:16070:55:288:30490:30468:42254:42255:5977:30488:42273:30489:6402:30846:6146:7126:6270:6360:7049:6611:6451:6364:6365:27:28:8283
6364	rRNA processing	26 out of 131 genes, 19.8%	176 out of 7288 background genes, 2.4%	1.56e-14	PWP2:RRP8:UTP5:UTP6:DBP3:RAI1:SLX9:NOP7:UTP8:NSR1:YGR251W:IPI1:UTP9:RIX1:NOP9:MAK11:UTP30:NOC3:SDO1:UTP13:TSR2:UTP14:UTP15:REX4:NOP8:NAN1	723:54:910:16070:30490:30468:42254:42255:42273:30489:30846:6270:7049:6364:6365:27:28:8283
6996	organelle organization and biogenesis	63 out of 131 genes, 48.1%	1293 out of 7288 background genes, 17.7%	4.32e-13	FUN30:YBL055C:PWP2:MCD1:NRP1:RRP8:YDR161W:BCP1:UTP5:ADA2:UTP6:TPA1:PEA2:DUO1:DBP3:HOS2:RAI1:CAX4:SLX9:NOP7:UTP8:NSR1:YGR251W:OSH3:IPI1:UTP9:RIX1:SDS3:PRK1:TID3:YVH1:NOP9:SET2:PFD1:RPA12:MAK11:UTP30:ENT4:NOC3:SDO1:RSA3:UTP13:TSR2:NBP1:UTP14:VPS9:CSM3:UTP15:AAH1:BNI5:NOP13:YNL313C:REX4:MSH2:PAP2:TRM11:NOP8:CTR9:NOC2:RPA43:SPC29:NAN1:BSP1	288:30466:7020:76:30468:30469:30100:45132:6402:7064:16571:6265:16573:147:15918:6623:16575:48228:30437:723:6487:16070:30472:16075:7103:31384:16076:31385:16077:5977:16078:42273:6887:6309:6342:6270:6451:7076:1403:6457:910:54:55:30447:7001:45835:735:6310:6311:30488:6312:30489:30846:6897:7049:6354:6355:43629:7266:27:6468:8283:28:742:921:7010:30490:42254:42255:7015:7121:7124:6146:31110:7126:43630:6325:…
16072	rRNA metabolic process	28 out of 131 genes, 21.4%	257 out of 7288 background genes, 3.5%	2.74e-12	PWP2:RRP8:UTP5:UTP6:DBP3:RAI1:SLX9:NOP7:UTP8:NSR1:YGR251W:IPI1:UTP9:RIX1:NOP9:MAK11:UTP30:NOC3:SDO1:UTP13:TSR2:UTP14:UTP15:NOP12:REX4:PAP2:NOP8:NAN1	30468:7064:6265:723:16070:16072:16075:16076:16077:16078:42273:6270:7076:54:910:30489:30846:7049:43629:27:28:8283:30490:42254:42255:43630:43634:6364:6365
6396	RNA processing	31 out of 131 genes, 23.7%	368 out of 7288 background genes, 5.0%	9.87e-11	PWP2:RRP8:UTP5:UTP6:DEG1:DBP3:RAI1:PRP38:SLX9:NOP7:UTP8:NSR1:YGR251W:IPI1:UTP9:RIX1:NOP9:MAK11:UTP30:TRZ1:NOC3:SDO1:UTP13:TSR2:UTP14:UTP15:CWC25:REX4:PAP2:NOP8:NAN1	30468:398:7064:6265:42779:723:16070:16075:16076:16077:16078:42273:6270:7076:54:910:30489:30846:7049:43629:27:28:8283:6396:30490:42254:42255:43630:43634:6364:6365
16070	RNA metabolic process	49 out of 131 genes, 37.4%	1022 out of 7288 background genes, 14.0%	7.52e-09	PWP2:RRP8:UTP5:UTP6:RBA50:POL5:TPA1:DEG1:DBP3:HOS2:RAI1:PRP38:SLX9:NOP7:UTP8:NSR1:YGR251W:IPI1:IKI1:UTP9:RIX1:SDS3:SHQ1:NOP9:SET2:RPA12:MAK11:UTP30:TRZ1:NOC3:SDO1:UTP13:DUS4:TSR2:TRM12:DUS1:UTP14:UTP15:CWC25:NOP12:REX4:MSH2:PAP2:TRM11:NOP8:CTR9:MOD5:RPA43:NAN1	288:30466:30468:398:6400:6402:7064:16571:6265:16575:42779:30437:723:16070:16072:16074:16075:16076:16077:16078:42273:6342:6270:6451:7076:54:910:45835:735:6310:6311:6312:30488:30489:30846:7049:6354:6355:43629:6357:27:28:8283:6396:30490:42254:42255:43630:6325:6360:43634:7059:9303:6364:6365:6366:6368:710:6298
16043	cellular component organization and biogenesis	76 out of 131 genes, 58.0%	2183 out of 7288 background genes, 30.0%	8.16e-09	FUN30:YBL055C:AST1:RHB1:PWP2:MCD1:NRP1:RRP8:YDR161W:BCP1:UTP5:ADA2:UTP6:HLR1:UTR2:TPA1:PEA2:BUD27:STE2:DUO1:DBP3:HOS2:RAI1:CAX4:SLX9:NOP7:UTP8:RSR1:NSR1:YGR251W:OSH3:IPI1:UTP9:RIX1:SDS3:PRK1:AXL2:TID3:YVH1:NOP9:SET2:PFD1:ECM25:RPA12:HMS2:MAK11:UTP30:ENT4:NOC3:SDO1:RSA3:UTP13:TSR2:NBP1:UTP14:VPS9:CSM3:UTP15:GYL1:FET4:AAH1:BNI5:NOP13:YNL313C:MDJ2:REX4:MSH2:PAP2:TRM11:NOP8:CTR9:NOC2:RPA43:SPC29:NAN1…	288:30466:7020:76:30468:30469:30100:45132:6402:17157:30031:7064:15809:16571:6265:16573:147:15918:6623:16575:40:48228:30437:723:6487:16070:30472:16075:7103:31384:16076:31385:16077:5977:16078:42273:6887:6888:6309:6342:6270:30150:15819:42493:6451:7076:15677:1403:6457:54:910:30447:55:45835:7001:735:6310:6311:30488:6312:30489:30846:6897:7047:15680:7049:6354:6355:43629:7264:7266:6468:27:28:8283:742:921…
30490	processing of 20S pre-rRNA	11 out of 131 genes, 8.4%	44 out of 7288 background genes, 0.6%	9.52e-08	PWP2:UTP5:UTP6:NOP7:UTP8:UTP9:UTP13:TSR2:UTP14:UTP15:NAN1	30468:42273:910:7049:8283:30490:42254:6365
6139	nucleobase, nucleoside, nucleotide and nucleic acid metabolic process	56 out of 131 genes, 42.7%	1510 out of 7288 background genes, 20.7%	3.61e-06	YBL055C:PWP2:RRP8:UTP5:URH1:ADA2:UTP6:RBA50:POL5:TPA1:DEG1:DBP3:HOS2:RAI1:PRP38:SLX9:NOP7:UTP8:NSR1:YGR251W:IPI1:IKI1:UTP9:RIX1:SDS3:SHQ1:NOP9:SET2:RPA12:MAK11:UTP30:TRZ1:NOC3:SDO1:UTP13:DUS4:TSR2:TRM12:DUS1:UTP14:CSM3:UTP15:ADE4:AAH1:CWC25:NOP12:GPD2:REX4:MSH2:PAP2:TRM11:NOP8:CTR9:MOD5:RPA43:NAN1	288:30466:76:8655:30468:398:6116:45132:6400:6402:7064:16571:6265:16573:16575:30433:42779:30437:723:16070:16072:16074:16075:16076:16077:16078:42273:6309:6164:6342:6270:6451:7076:54:910:45835:735:6310:6311:6312:30488:30489:30846:46135:7049:6354:6355:43629:6357:27:28:8283:6396:30490:42254:42255:6071:6144:6146:43630:6325:6979:6360:43634:7059:9303:6364:16568:6365:6366:6189:6368:710:6298
42255	ribosome assembly	9 out of 131 genes, 6.9%	65 out of 7288 background genes, 0.9%	0.001	DBP3:NSR1:IPI1:RIX1:MAK11:RSA3:REX4:NOP8:NOC2	723:42273:54:30489:27:28:42254:42255:6364:6365
Function
GOID	GO_term	Cluster frequency	Background frequency	P-value	Gene(s) annotated to the term	Directly Annotated GOID List
30515	snoRNA binding	10 out of 131 genes, 7.6%	28 out of 7288 background genes, 0.4%	4.49e-09	PWP2:UTP5:UTP6:SLX9:UTP8:UTP9:UTP13:UTP14:UTP15:NAN1	30515
Component
GOID	GO_term	Cluster frequency	Background frequency	P-value	Gene(s) annotated to the term	Directly Annotated GOID List
5730	nucleolus	29 out of 131 genes, 22.1%	303 out of 7288 background genes, 4.2%	8.38e-12	PWP2:RRP8:UTP5:UTP6:POL5:DBP3:SLX9:NOP7:UTP8:NSR1:YGR251W:UTP9:YIL091C:NOP9:RPA12:UTP30:NOC3:RSA3:UTP13:UTP14:UTP15:NOP13:NOP12:REX4:NOP8:NOC2:MOD5:RPA43:NAN1	30687:30688:30869:5730:5634:5732:5654:30690:5736:30691:5737:5739:5829:30686
44464	cell part	129 out of 131 genes, 98.5%	5495 out of 7288 background genes, 75.4%	9.4e-12	FUN30:YBL055C:AST1:YBR028C:TAT1:RHB1:YCR043C:CTR86:PWP2:MCD1:NRP1:YDR049W:RRP8:YDR161W:SET7:BCP1:UTP5:URH1:ADA2:UTP6:LPP1:RBA50:HLR1:UTR2:YEL048C:POL5:TPA1:PEA2:DEG1:BUD27:STE2:RMD8:DUO1:DBP3:ABC1:YGL157W:SUA5:HOS2:RAI1:CAX4:PRP38:SLX9:NOP7:UTP8:RSR1:NSR1:RBG2:YGR251W:LAG1:GPA1:INM1:FSH1:OSH3:IPI1:SPL2:SKG6:IKI1:UTP9:RIX1:SDS3:YIL091C:PRK1:SHQ1:AXL2:TID3:PAN6:YVH1:NOP9:SAP185:SET2:PFD1:ECM25:OPT1…	5783:9277:46695:30686:30687:30688:144:30869:798:324:5823:508:5681:5933:5829:5934:5935:5938:5794:5798:30478:30479:30690:30691:118:31499:228:5654:1405:5834:5940:5768:5876:8023:124:778:19897:19898:5624:5730:5732:16593:5736:5737:5739:5774:5886:5887:780:16272:131:133:30136:42729:5634:16020:16021:5816:5743:46540:5671:5819:30176:31262
31981	nuclear lumen	37 out of 131 genes, 28.2%	602 out of 7288 background genes, 8.3%	1.61e-09	PWP2:RRP8:UTP5:ADA2:UTP6:POL5:DBP3:HOS2:SLX9:NOP7:UTP8:NSR1:YGR251W:IPI1:IKI1:UTP9:RIX1:SDS3:YIL091C:SHQ1:NOP9:RPA12:UTP30:NOC3:RSA3:UTP13:UTP14:UTP15:NOP13:NOP12:REX4:NOP8:CTR9:NOC2:MOD5:RPA43:NAN1	46695:30686:30687:30688:30869:508:5829:30690:30691:118:5654:8023:124:5730:5732:16593:5736:5737:5739:5634:5671
5634	nucleus	68 out of 131 genes, 51.9%	1994 out of 7288 background genes, 27.4%	2.79e-07	FUN30:PWP2:MCD1:RRP8:YDR161W:SET7:BCP1:UTP5:URH1:ADA2:UTP6:POL5:TPA1:DEG1:DUO1:DBP3:YGL157W:HOS2:RAI1:PRP38:SLX9:NOP7:UTP8:NSR1:YGR251W:INM1:FSH1:IPI1:IKI1:UTP9:RIX1:SDS3:YIL091C:SHQ1:TID3:PAN6:NOP9:SET2:RPA12:JJJ3:HMS2:UTP30:TRZ1:NOC3:SDO1:RSA3:UTP13:TSR2:NBP1:DUS1:UTP14:CSM3:UTP15:AAH1:NOP13:SQS1:CWC25:YNL313C:NOP12:REX4:MSH2:PAP2:NOP8:CTR9:NOC2:MOD5:RPA43:NAN1	46695:30686:30687:30688:30869:798:5823:508:5681:5829:30690:30691:118:31499:228:5654:5876:8023:124:778:5730:5732:16593:5736:5737:5739:780:42729:5634:5816:46540:5671:5819:31262
44424	intracellular part	118 out of 131 genes, 90.1%	5052 out of 7288 background genes, 69.3%	1.72e-06	FUN30:YBL055C:YBR028C:YCR043C:CTR86:PWP2:MCD1:NRP1:YDR049W:RRP8:YDR161W:SET7:BCP1:UTP5:URH1:ADA2:UTP6:RBA50:HLR1:UTR2:YEL048C:POL5:TPA1:PEA2:DEG1:BUD27:RMD8:DUO1:DBP3:ABC1:YGL157W:SUA5:HOS2:RAI1:CAX4:PRP38:SLX9:NOP7:UTP8:NSR1:RBG2:YGR251W:LAG1:GPA1:INM1:FSH1:OSH3:IPI1:SPL2:SKG6:IKI1:UTP9:RIX1:SDS3:YIL091C:PRK1:SHQ1:AXL2:TID3:PAN6:YVH1:NOP9:SAP185:SET2:PFD1:ECM25:OPT1:CPR7:RPA12:JJJ3:HMS2:UTP30:TR…	5783:9277:46695:30686:30687:30688:144:30869:798:324:5823:508:5681:5933:5829:5934:5935:5938:5794:5798:30478:30479:30690:30691:118:31499:228:5654:1405:5834:5940:5768:5876:8023:124:778:5624:5730:5732:16593:5736:5737:5739:5774:5886:780:5887:16272:131:133:30136:42729:5634:16021:5743:5816:46540:5671:5819:31262:30176
5622	intracellular	118 out of 131 genes, 90.1%	5087 out of 7288 background genes, 69.8%	3.22e-06	FUN30:YBL055C:YBR028C:YCR043C:CTR86:PWP2:MCD1:NRP1:YDR049W:RRP8:YDR161W:SET7:BCP1:UTP5:URH1:ADA2:UTP6:RBA50:HLR1:UTR2:YEL048C:POL5:TPA1:PEA2:DEG1:BUD27:RMD8:DUO1:DBP3:ABC1:YGL157W:SUA5:HOS2:RAI1:CAX4:PRP38:SLX9:NOP7:UTP8:NSR1:RBG2:YGR251W:LAG1:GPA1:INM1:FSH1:OSH3:IPI1:SPL2:SKG6:IKI1:UTP9:RIX1:SDS3:YIL091C:PRK1:SHQ1:AXL2:TID3:PAN6:YVH1:NOP9:SAP185:SET2:PFD1:ECM25:OPT1:CPR7:RPA12:JJJ3:HMS2:UTP30:TR…	5783:9277:46695:30686:30687:30688:144:30869:798:324:5823:508:5681:5933:5829:5934:5935:5938:5794:5798:30478:30479:30690:30691:118:31499:228:5654:1405:5834:5940:5768:5876:8023:124:778:5624:5730:5732:16593:5736:5737:5739:5774:5886:780:5887:16272:131:133:30136:42729:5634:16021:5743:5816:46540:5671:5819:31262:30176
31974	membrane-enclosed lumen	37 out of 131 genes, 28.2%	818 out of 7288 background genes, 11.2%	9.29e-06	PWP2:RRP8:UTP5:ADA2:UTP6:POL5:DBP3:HOS2:SLX9:NOP7:UTP8:NSR1:YGR251W:IPI1:IKI1:UTP9:RIX1:SDS3:YIL091C:SHQ1:NOP9:RPA12:UTP30:NOC3:RSA3:UTP13:UTP14:UTP15:NOP13:NOP12:REX4:NOP8:CTR9:NOC2:MOD5:RPA43:NAN1	46695:30686:30687:30688:30869:508:5829:30690:30691:118:5654:8023:124:5730:5732:16593:5736:5737:5739:5634:5671
43233	organelle lumen	37 out of 131 genes, 28.2%	818 out of 7288 background genes, 11.2%	9.29e-06	PWP2:RRP8:UTP5:ADA2:UTP6:POL5:DBP3:HOS2:SLX9:NOP7:UTP8:NSR1:YGR251W:IPI1:IKI1:UTP9:RIX1:SDS3:YIL091C:SHQ1:NOP9:RPA12:UTP30:NOC3:RSA3:UTP13:UTP14:UTP15:NOP13:NOP12:REX4:NOP8:CTR9:NOC2:MOD5:RPA43:NAN1	46695:30686:30687:30688:30869:508:5829:30690:30691:118:5654:8023:124:5730:5732:16593:5736:5737:5739:5634:5671
43228	non-membrane-bound organelle	42 out of 131 genes, 32.1%	1025 out of 7288 background genes, 14.1%	1.48e-05	PWP2:MCD1:RRP8:UTP5:UTP6:UTR2:POL5:PEA2:DUO1:DBP3:SLX9:NOP7:UTP8:NSR1:YGR251W:UTP9:YIL091C:PRK1:AXL2:TID3:NOP9:RPA12:UTP30:ENT4:NOC3:RSA3:UTP13:NBP1:UTP14:UTP15:BNI5:NOP13:NOP12:REX4:MSH2:NOP8:NOC2:MOD5:RPA43:SPC29:NAN1:BSP1	9277:30686:30687:30688:144:30869:798:5823:5934:5829:5935:30478:30479:30690:30691:228:5654:5940:5876:778:5624:5730:5732:5736:5737:5739:780:5887:133:42729:5634:5816:5819:31262
43232	intracellular non-membrane-bound organelle	42 out of 131 genes, 32.1%	1025 out of 7288 background genes, 14.1%	1.48e-05	PWP2:MCD1:RRP8:UTP5:UTP6:UTR2:POL5:PEA2:DUO1:DBP3:SLX9:NOP7:UTP8:NSR1:YGR251W:UTP9:YIL091C:PRK1:AXL2:TID3:NOP9:RPA12:UTP30:ENT4:NOC3:RSA3:UTP13:NBP1:UTP14:UTP15:BNI5:NOP13:NOP12:REX4:MSH2:NOP8:NOC2:MOD5:RPA43:SPC29:NAN1:BSP1	9277:30686:30687:30688:144:30869:798:5823:5934:5829:5935:30478:30479:30690:30691:228:5654:5940:5876:778:5624:5730:5732:5736:5737:5739:780:5887:133:42729:5634:5816:5819:31262
44428	nuclear part	44 out of 131 genes, 33.6%	1105 out of 7288 background genes, 15.2%	1.49e-05	PWP2:MCD1:RRP8:UTP5:ADA2:UTP6:POL5:DUO1:DBP3:HOS2:PRP38:SLX9:NOP7:UTP8:NSR1:YGR251W:IPI1:IKI1:UTP9:RIX1:SDS3:YIL091C:SHQ1:TID3:NOP9:RPA12:UTP30:NOC3:RSA3:UTP13:UTP14:UTP15:NOP13:CWC25:NOP12:REX4:MSH2:PAP2:NOP8:CTR9:NOC2:MOD5:RPA43:NAN1	46695:30686:30687:30688:30869:798:508:5681:5829:30690:30691:118:31499:228:5654:5876:8023:124:778:5730:5732:16593:5736:5737:5739:780:42729:5634:5816:46540:5671:5819:31262
44452	nucleolar part	15 out of 131 genes, 11.5%	174 out of 7288 background genes, 2.4%	7.08e-05	PWP2:UTP5:UTP6:SLX9:UTP8:UTP9:RPA12:NOC3:RSA3:UTP13:UTP14:UTP15:NOC2:RPA43:NAN1	30686:30687:30688:30869:30690:30691:5730:5732:5736:5737:5739:5634
30685	nucleolar preribosome	5 out of 131 genes, 3.8%	14 out of 7288 background genes, 0.2%	0.00049	PWP2:SLX9:NOC3:RSA3:NOC2	30686:30687:30688:30690:30691:5730:5732:5737:5739:5634
30684	preribosome	5 out of 131 genes, 3.8%	15 out of 7288 background genes, 0.2%	0.00073	PWP2:SLX9:NOC3:RSA3:NOC2	30686:30687:30688:30690:30691:5730:5732:5737:5739:5634
Bi-Cluster 2	score = 284
				Mean pattern, and conditions
YDR448W	ADA2	YDR448W
YPR180W	AOS1	YPR180W
YHR137W	ARO9	YHR137W
YDR252W	BTT1	YDR252W
YJR092W	BUD4	YJR092W
YJR060W	CBF1	YJR060W
YLR433C	CNA1	YLR433C
YJR032W	CPR7	YJR032W
YPR124W	CTR1	YPR124W
YCR054C	CTR86	YCR054C
YOL145C	CTR9	YOL145C
YGR036C	CAX4	YGR036C
YKL096W	CWP1	YKL096W
YMR032W	HOF1	YMR032W
YOR236W	DFR1	YOR236W
YJL201W	ECM25	YJL201W
YJL085W	EXO70	YJL085W
YJL168C	SET2	YJL168C
YCR028C	FEN2	YCR028C
YMR319C	FET4	YMR319C
YHR061C	GIC1	YHR061C
YHR005C	GPA1	YHR005C
YOL059W	GPD2	YOL059W
YGL194C	HOS2	YGL194C
YHR187W	IKI1	YHR187W
YHL003C	LAG1	YHL003C
YNL328C	MDJ2	YNL328C
YBR193C	MED8	YBR193C
YLR457C	NBP1	YLR457C
YJR112W	NNF1	YJR112W
YER059W	PCL6	YER059W
YJL179W	PFD1	YJL179W
YKL127W	PGM1	YKL127W
YIL095W	PRK1	YIL095W
YGR075C	PRP38	YGR075C
YBR237W	PRP5	YBR237W
YDR257C	SET7	YDR257C
YMR061W	RNA14	YMR061W
YDR484W	VPS52	YDR484W
YGL229C	SAP4	YGL229C
YIL084C	SDS3	YIL084C
YNL272C	SEC2	YNL272C
YER068W	MOT2	YER068W
YNR034W	SOL1	YNR034W
YHR136C	SPL2	YHR136C
YER022W	SRB4	YER022W
YLR452C	SST2	YLR452C
YFL026W	STE2	YFL026W
YJL176C	SWI3	YJL176C
YIL144W	TID3	YIL144W
YOL115W	PAP2	YOL115W
YBR069C	TAT1	YBR069C
YML097C	VPS9	YML097C
YAL032C	PRP45	YAL032C
YBL055C	non	YBL055C
YBR028C	non	YBR028C
YBR102C	EXO84	YBR102C
YBR216C	YBP1	YBR216C
YCL045C	non	YCL045C
YCR027C	RHB1	YCR027C
YDR036C	EHD3	YDR036C
YDR111C	ALT2	YDR111C
YDR219C	MFB1	YDR219C
YEL048C	non	YEL048C
YER080W	FMP29	YER080W
YGL157W	non	YGL157W
YGR081C	SLX9	YGR081C
YHR073W	OSH3	YHR073W
YIL158W	non	YIL158W
YJR083C	ACF4	YJR083C
YKL061W	non	YKL061W
YKL116C	PRR1	YKL116C
YKR023W	non	YKR023W
YLL032C	non	YLL032C
YLL038C	ENT4	YLL038C
YLR369W	SSQ1	YLR369W
YLR373C	VID22	YLR373C
YLR405W	DUS4	YLR405W
YML096W	non	YML096W
YMR048W	CSM3	YMR048W
YMR178W	non	YMR178W
YMR192W	GYL1	YMR192W
YMR259C	non	YMR259C
YNL058C	non	YNL058C
YNL078W	NIS1	YNL078W
YNL155W	non	YNL155W
YNL163C	RIA1	YNL163C
YNL224C	SQS1	YNL224C
YNL245C	CWC25	YNL245C
YNL275W	BOR1	YNL275W
YNR014W	non	YNR014W
YPL126W	NAN1	YPL126W
YPR156C	TPO3	YPR156C
YPR171W	BSP1	YPR171W
GO Enrichments
Component
GOID	GO_term	Cluster frequency	Background frequency	P-value	Gene(s) annotated to the term	Directly Annotated GOID List
44464	cell part	92 out of 94 genes, 97.9%	5495 out of 7288 background genes, 75.4%	2.13e-07	PRP45:YBL055C:YBR028C:TAT1:EXO84:MED8:YBP1:PRP5:YCL045C:RHB1:FEN2:CTR86:EHD3:ALT2:MFB1:BTT1:SET7:ADA2:VPS52:YEL048C:SRB4:PCL6:MOT2:FMP29:STE2:YGL157W:HOS2:SAP4:CAX4:PRP38:SLX9:LAG1:GPA1:GIC1:OSH3:SPL2:ARO9:IKI1:SDS3:PRK1:TID3:YIL158W:EXO70:SET2:SWI3:PFD1:ECM25:CPR7:CBF1:BUD4:NNF1:YKL061W:CWP1:PRR1:PGM1:YKR023W:YLL032C:ENT4:SSQ1:VID22:CNA1:SST2:NBP1:YML096W:VPS9:HOF1:CSM3:RNA14:YMR178W:GYL1:YMR259…	5854:5783:9277:46695:938:30686:142:30688:30869:145:324:5823:508:5681:5933:5829:5934:5935:5759:5794:5798:30478:30479:118:31499:151:119:5830:16585:31315:1405:5834:5768:43332:16514:30015:8023:776:124:778:5621:19897:307:5624:5730:5732:16592:16593:5840:5737:5739:5773:5774:5849:5955:922:818:5886:5887:780:16272:131:30136:5634:5816:5743:46540:5671:16023:30176:31262
44424	intracellular part	83 out of 94 genes, 88.3%	5052 out of 7288 background genes, 69.3%	0.00208	PRP45:YBL055C:YBR028C:EXO84:MED8:YBP1:PRP5:YCL045C:CTR86:EHD3:ALT2:MFB1:BTT1:SET7:ADA2:VPS52:YEL048C:SRB4:PCL6:MOT2:FMP29:YGL157W:HOS2:SAP4:CAX4:PRP38:SLX9:LAG1:GPA1:GIC1:OSH3:SPL2:ARO9:IKI1:SDS3:PRK1:TID3:YIL158W:EXO70:SET2:SWI3:PFD1:ECM25:CPR7:CBF1:BUD4:NNF1:YKL061W:PRR1:PGM1:YKR023W:YLL032C:ENT4:SSQ1:CNA1:NBP1:YML096W:VPS9:HOF1:CSM3:RNA14:YMR178W:GYL1:YMR259C:YNL058C:NIS1:YNL155W:RIA1:SQS1:CWC…	5854:5783:46695:938:30686:142:30688:30869:145:324:5823:508:5681:5933:5829:5934:5935:5759:5794:5798:30478:30479:118:31499:151:119:5830:16585:31315:1405:5834:5768:43332:16514:8023:30015:776:124:778:5624:307:5730:5732:16592:16593:5840:5737:5739:5773:5774:5849:5955:922:818:5886:780:16272:131:30136:5634:5743:5816:16023:46540:5671:31262:30176
44448	cell cortex part	8 out of 94 genes, 8.5%	88 out of 7288 background genes, 1.2%	0.00267	EXO84:GIC1:PRK1:EXO70:BUD4:ENT4:HOF1:BSP1	142:145:5934:5935:30478:30479:43332:5624:131
5622	intracellular	83 out of 94 genes, 88.3%	5087 out of 7288 background genes, 69.8%	0.00314	PRP45:YBL055C:YBR028C:EXO84:MED8:YBP1:PRP5:YCL045C:CTR86:EHD3:ALT2:MFB1:BTT1:SET7:ADA2:VPS52:YEL048C:SRB4:PCL6:MOT2:FMP29:YGL157W:HOS2:SAP4:CAX4:PRP38:SLX9:LAG1:GPA1:GIC1:OSH3:SPL2:ARO9:IKI1:SDS3:PRK1:TID3:YIL158W:EXO70:SET2:SWI3:PFD1:ECM25:CPR7:CBF1:BUD4:NNF1:YKL061W:PRR1:PGM1:YKR023W:YLL032C:ENT4:SSQ1:CNA1:NBP1:YML096W:VPS9:HOF1:CSM3:RNA14:YMR178W:GYL1:YMR259C:YNL058C:NIS1:YNL155W:RIA1:SQS1:CWC…	5854:5783:46695:938:30686:142:30688:30869:145:324:5823:508:5681:5933:5829:5934:5935:5759:5794:5798:30478:30479:118:31499:151:119:5830:16585:31315:1405:5834:5768:43332:16514:8023:30015:776:124:778:5624:307:5730:5732:16592:16593:5840:5737:5739:5773:5774:5849:5955:922:818:5886:780:16272:131:30136:5634:5743:5816:16023:46540:5671:31262:30176
5938	cell cortex	8 out of 94 genes, 8.5%	100 out of 7288 background genes, 1.4%	0.00682	EXO84:GIC1:PRK1:EXO70:BUD4:ENT4:HOF1:BSP1	142:145:5934:5935:30478:30479:43332:5624:131
				Mean pattern, and conditions
Bi-Cluster 3	score = 308
YDR448W	ADA2	YDR448W
YML035C	AMD1	YML035C
YPR180W	AOS1	YPR180W
YBR211C	AME1	YBR211C
YOR377W	ATF1	YOR377W
YDR252W	BTT1	YDR252W
YJR060W	CBF1	YJR060W
YGL190C	CDC55	YGL190C
YLR433C	CNA1	YLR433C
YJR032W	CPR7	YJR032W
YOL007C	CSI2	YOL007C
YPR124W	CTR1	YPR124W
YCR054C	CTR86	YCR054C
YOL145C	CTR9	YOL145C
YGR036C	CAX4	YGR036C
YMR032W	HOF1	YMR032W
YJL201W	ECM25	YJL201W
YNL327W	EGT2	YNL327W
YJL085W	EXO70	YJL085W
YJL168C	SET2	YJL168C
YCR028C	FEN2	YCR028C
YMR319C	FET4	YMR319C
YKL173W	SNU114	YKL173W
YHR005C	GPA1	YHR005C
YOL059W	GPD2	YOL059W
YPL076W	GPI2	YPL076W
YJL044C	GYP6	YJL044C
YJR147W	HMS2	YJR147W
YGL194C	HOS2	YGL194C
YHR187W	IKI1	YHR187W
YPL263C	KEL3	YPL263C
YHL003C	LAG1	YHL003C
YOR171C	LCB4	YOR171C
YNL328C	MDJ2	YNL328C
YBR193C	MED8	YBR193C
YLR457C	NBP1	YLR457C
YDL167C	NRP1	YDL167C
YJL061W	NUP82	YJL061W
YJL179W	PFD1	YJL179W
YIL095W	PRK1	YIL095W
YGR075C	PRP38	YGR075C
YBR237W	PRP5	YBR237W
YDR257C	SET7	YDR257C
YMR061W	RNA14	YMR061W
YCR035C	RRP43	YCR035C
YDR484W	VPS52	YDR484W
YGL229C	SAP4	YGL229C
YIL084C	SDS3	YIL084C
YNL272C	SEC2	YNL272C
YER068W	MOT2	YER068W
YNR034W	SOL1	YNR034W
YHR136C	SPL2	YHR136C
YER022W	SRB4	YER022W
YIL140W	AXL2	YIL140W
YLR452C	SST2	YLR452C
YDR169C	STB3	YDR169C
YFL026W	STE2	YFL026W
YGL169W	SUA5	YGL169W
YNL066W	SUN4	YNL066W
YJL176C	SWI3	YJL176C
YDR161W	non	YDR161W
YIL144W	TID3	YIL144W
YOL115W	PAP2	YOL115W
YDR207C	UME6	YDR207C
YBR069C	TAT1	YBR069C
YJL154C	VPS35	YJL154C
YML097C	VPS9	YML097C
YAL032C	PRP45	YAL032C
YBL055C	non	YBL055C
YBR028C	non	YBR028C
YBR102C	EXO84	YBR102C
YBR216C	YBP1	YBR216C
YCL045C	non	YCL045C
YCR027C	RHB1	YCR027C
YCR057C	PWP2	YCR057C
YDL123W	SNA4	YDL123W
YDR036C	EHD3	YDR036C
YDR049W	non	YDR049W
YDR111C	ALT2	YDR111C
YDR219C	MFB1	YDR219C
YDR266C	non	YDR266C
YDR524C	AGE1	YDR524C
YDR527W	RBA50	YDR527W
YDR528W	HLR1	YDR528W
YEL048C	non	YEL048C
YER080W	FMP29	YER080W
YFL023W	BUD27	YFL023W
YGL157W	non	YGL157W
YGL246C	RAI1	YGL246C
YGR081C	SLX9	YGR081C
YGR103W	NOP7	YGR103W
YGR251W	non	YGR251W
YHR073W	OSH3	YHR073W
YHR085W	IPI1	YHR085W
YIL104C	SHQ1	YIL104C
YIL117C	PRM5	YIL117C
YJL029C	VPS53	YJL029C
YJL186W	MNN5	YJL186W
YJL212C	OPT1	YJL212C
YJR003C	non	YJR003C
YJR083C	ACF4	YJR083C
YKL061W	non	YKL061W
YKL088W	non	YKL088W
YKL116C	PRR1	YKL116C
YKR023W	non	YKR023W
YKR045C	non	YKR045C
YKR079C	TRZ1	YKR079C
YLL032C	non	YLL032C
YLL038C	ENT4	YLL038C
YLR022C	SDO1	YLR022C
YLR369W	SSQ1	YLR369W
YLR405W	DUS4	YLR405W
YLR413W	non	YLR413W
YLR435W	TSR2	YLR435W
YML005W	TRM12	YML005W
YML082W	non	YML082W
YML096W	non	YML096W
YMR048W	CSM3	YMR048W
YMR178W	non	YMR178W
YMR192W	GYL1	YMR192W
YMR259C	non	YMR259C
YNL058C	non	YNL058C
YNL065W	AQR1	YNL065W
YNL078W	NIS1	YNL078W
YNL155W	non	YNL155W
YNL158W	PGA1	YNL158W
YNL191W	DUG3	YNL191W
YNL215W	IES2	YNL215W
YNL224C	SQS1	YNL224C
YNL245C	CWC25	YNL245C
YNL275W	BOR1	YNL275W
YNR014W	non	YNR014W
YOL041C	NOP12	YOL041C
YOL144W	NOP8	YOL144W
YOR104W	PIN2	YOR104W
YOR206W	NOC2	YOR206W
YPL014W	non	YPL014W
YPL047W	SGF11	YPL047W
YPR091C	non	YPR091C
YPR156C	TPO3	YPR156C
YPR171W	BSP1	YPR171W
GO Enrichments
GOID	GO_term	Cluster frequency	Background frequency	P-value	Gene(s) annotated to the term	Directly Annotated GOID List
16043	cellular component organization and biogenesis	68 out of 141 genes, 48.2%	2183 out of 7288 background genes, 30.0%	0.00166	YBL055C:EXO84:AME1:PRP5:RHB1:FEN2:RRP43:PWP2:NRP1:EHD3:YDR161W:UME6:MFB1:ADA2:VPS52:AGE1:HLR1:MOT2:BUD27:STE2:CDC55:HOS2:RAI1:CAX4:SLX9:NOP7:YGR251W:OSH3:IPI1:SDS3:PRK1:AXL2:TID3:VPS53:GYP6:NUP82:EXO70:VPS35:SET2:SWI3:PFD1:ECM25:YJR003C:CBF1:ACF4:HMS2:SNU114:ENT4:SDO1:CNA1:TSR2:NBP1:VPS9:CSM3:GYL1:FET4:SUN4:PGA1:SEC2:BOR1:MDJ2:SOL1:PAP2:NOP8:CTR9:NOC2:SGF11:BSP1	289:30468:30469:30100:7131:6402:30031:6333:6406:6407:7064:30036:6408:15809:6409:6265:6338:147:7068:6623:40:48228:723:15887:6487:42273:6412:6342:15819:6999:42493:7076:15677:1403:370:54:7001:45835:45836:7005:30489:45045:30846:15680:6354:6355:6357:46713:8608:742:7010:30490:42147:747:7015:749:45053:8033:245:16567:6364:16568:6365:7094:6366:8610:6368:7020:6873:76:398:754:45132:17157:6511:16571:16573:15…
6396	RNA processing	21 out of 141 genes, 14.9%	368 out of 7288 background genes, 5.0%	0.00361	PRP45:EXO84:PRP5:RRP43:PWP2:MOT2:RAI1:PRP38:SLX9:NOP7:YGR251W:IPI1:SNU114:TRZ1:SDO1:TSR2:RNA14:CWC25:SOL1:PAP2:NOP8	289:30468:6402:7064:6409:6265:42779:723:42273:7076:370:30489:30846:6357:30490:747:8033:6364:16567:245:6365:6368:398:6378:6379:16070:16075:16076:16077:16078:6887:910:45944:7049:43629:27:349:8283:42254:43630:43634
Component
GOID	GO_term	Cluster frequency	Background frequency	P-value	Gene(s) annotated to the term	Directly Annotated GOID List
44464	cell part	137 out of 141 genes, 97.2%	5495 out of 7288 background genes, 75.4%	1.28e-10	PRP45:YBL055C:YBR028C:TAT1:EXO84:MED8:AME1:YBP1:PRP5:YCL045C:RHB1:FEN2:RRP43:CTR86:PWP2:SNA4:NRP1:EHD3:YDR049W:ALT2:YDR161W:STB3:UME6:MFB1:BTT1:SET7:YDR266C:ADA2:VPS52:AGE1:RBA50:HLR1:YEL048C:SRB4:MOT2:FMP29:BUD27:STE2:YGL157W:SUA5:CDC55:HOS2:SAP4:RAI1:CAX4:PRP38:SLX9:NOP7:YGR251W:LAG1:GPA1:OSH3:IPI1:SPL2:IKI1:SDS3:PRK1:SHQ1:PRM5:AXL2:TID3:VPS53:GYP6:NUP82:EXO70:VPS35:SET2:SWI3:PFD1:MNN5:ECM25:OP…	5854:5783:9277:46695:938:30686:142:30688:145:324:5643:12505:506:5823:329:508:5681:5933:5682:5829:5934:5935:5759:5794:30904:5798:30479:30690:30691:118:31499:119:151:5830:16585:5654:159:31315:1405:5834:5940:5768:16514:30015:8023:776:124:778:19897:5624:5625:5730:5732:16592:16593:5840:5737:5739:5773:5774:5849:5955:817:5886:5887:780:16272:131:5811:30136:5634:5635:16021:5743:5816:16023:5671:176:46540:1…
44424	intracellular part	127 out of 141 genes, 90.1%	5052 out of 7288 background genes, 69.3%	5.29e-07	PRP45:YBL055C:YBR028C:EXO84:MED8:AME1:YBP1:PRP5:YCL045C:RRP43:CTR86:PWP2:SNA4:NRP1:EHD3:YDR049W:ALT2:YDR161W:STB3:UME6:MFB1:BTT1:SET7:YDR266C:ADA2:VPS52:AGE1:RBA50:HLR1:YEL048C:SRB4:MOT2:FMP29:BUD27:YGL157W:SUA5:CDC55:HOS2:SAP4:RAI1:CAX4:PRP38:SLX9:NOP7:YGR251W:LAG1:GPA1:OSH3:IPI1:SPL2:IKI1:SDS3:PRK1:SHQ1:AXL2:TID3:VPS53:GYP6:NUP82:EXO70:VPS35:SET2:SWI3:PFD1:MNN5:ECM25:OPT1:YJR003C:CPR7:CBF1:HMS2…	5854:5783:9277:46695:938:30686:142:30688:145:324:5643:12505:506:5823:329:508:5681:5933:5682:5829:5934:5935:5759:5794:30904:5798:30479:30690:30691:118:31499:151:119:5830:16585:5654:159:31315:1405:5834:5940:5768:16514:8023:30015:776:124:778:5624:5625:5730:5732:16592:16593:5840:5737:5739:5773:5774:5849:5955:817:5886:780:5887:16272:131:5811:30136:5634:5635:5743:5816:16023:46540:5671:176:177:31262:301…
5622	intracellular	127 out of 141 genes, 90.1%	5087 out of 7288 background genes, 69.8%	1.03e-06	PRP45:YBL055C:YBR028C:EXO84:MED8:AME1:YBP1:PRP5:YCL045C:RRP43:CTR86:PWP2:SNA4:NRP1:EHD3:YDR049W:ALT2:YDR161W:STB3:UME6:MFB1:BTT1:SET7:YDR266C:ADA2:VPS52:AGE1:RBA50:HLR1:YEL048C:SRB4:MOT2:FMP29:BUD27:YGL157W:SUA5:CDC55:HOS2:SAP4:RAI1:CAX4:PRP38:SLX9:NOP7:YGR251W:LAG1:GPA1:OSH3:IPI1:SPL2:IKI1:SDS3:PRK1:SHQ1:AXL2:TID3:VPS53:GYP6:NUP82:EXO70:VPS35:SET2:SWI3:PFD1:MNN5:ECM25:OPT1:YJR003C:CPR7:CBF1:HMS2…	5854:5783:9277:46695:938:30686:142:30688:145:324:5643:12505:506:5823:329:508:5681:5933:5682:5829:5934:5935:5759:5794:30904:5798:30479:30690:30691:118:31499:151:119:5830:16585:5654:159:31315:1405:5834:5940:5768:16514:8023:30015:776:124:778:5624:5625:5730:5732:16592:16593:5840:5737:5739:5773:5774:5849:5955:817:5886:780:5887:16272:131:5811:30136:5634:5635:5743:5816:16023:46540:5671:176:177:31262:301…
5737	cytoplasm	95 out of 141 genes, 67.4%	3694 out of 7288 background genes, 50.7%	0.00694	YBL055C:YBR028C:EXO84:AME1:YBP1:YCL045C:RRP43:CTR86:PWP2:SNA4:NRP1:EHD3:YDR049W:ALT2:YDR161W:STB3:MFB1:BTT1:YDR266C:VPS52:AGE1:RBA50:HLR1:YEL048C:MOT2:FMP29:BUD27:YGL157W:SUA5:SAP4:CAX4:SLX9:LAG1:GPA1:OSH3:SPL2:IKI1:PRK1:AXL2:VPS53:GYP6:EXO70:VPS35:PFD1:MNN5:ECM25:OPT1:YJR003C:CPR7:CBF1:HMS2:YKL061W:YKL088W:PRR1:YKR023W:YKR045C:TRZ1:YLL032C:ENT4:SDO1:SSQ1:CNA1:TSR2:NBP1:TRM12:AMD1:YML082W:YML096W…	5854:5783:9277:938:30686:142:30688:145:324:12505:506:5823:329:5933:5829:5934:5935:5759:5794:30904:5798:30479:30690:30691:151:5830:31315:1405:5834:5940:5768:8023:30015:776:5624:5625:5730:5732:5840:5737:5739:5773:5774:5849:5955:817:5886:5887:16272:131:5811:30136:5634:5743:5816:16023:176:177:30176
Bi-Cluster 4	score = 320			Mean pattern, and conditions
YDR448W	ADA2	YDR448W
YPR180W	AOS1	YPR180W
YHR137W	ARO9	YHR137W
YDR252W	BTT1	YDR252W
YJR092W	BUD4	YJR092W
YJR060W	CBF1	YJR060W
YLR433C	CNA1	YLR433C
YNR028W	CPR8	YNR028W
YOL007C	CSI2	YOL007C
YPR124W	CTR1	YPR124W
YCR054C	CTR86	YCR054C
YOL145C	CTR9	YOL145C
YGR036C	CAX4	YGR036C
YKL096W	CWP1	YKL096W
YMR032W	HOF1	YMR032W
YJL201W	ECM25	YJL201W
YJL085W	EXO70	YJL085W
YJL168C	SET2	YJL168C
YMR319C	FET4	YMR319C
YHR061C	GIC1	YHR061C
YHR005C	GPA1	YHR005C
YJR147W	HMS2	YJR147W
YGL194C	HOS2	YGL194C
YBR272C	HSM3	YBR272C
YHR187W	IKI1	YHR187W
YHL003C	LAG1	YHL003C
YNL328C	MDJ2	YNL328C
YLR457C	NBP1	YLR457C
YDL167C	NRP1	YDL167C
YJL061W	NUP82	YJL061W
YJL179W	PFD1	YJL179W
YIL095W	PRK1	YIL095W
YGR075C	PRP38	YGR075C
YBR237W	PRP5	YBR237W
YJL166W	QCR8	YJL166W
YDR257C	SET7	YDR257C
YMR061W	RNA14	YMR061W
YKR008W	RSC4	YKR008W
YDR484W	VPS52	YDR484W
YGL229C	SAP4	YGL229C
YBR070C	ALG14	YBR070C
YIL084C	SDS3	YIL084C
YNL272C	SEC2	YNL272C
YER068W	MOT2	YER068W
YNR034W	SOL1	YNR034W
YHR136C	SPL2	YHR136C
YER022W	SRB4	YER022W
YIL140W	AXL2	YIL140W
YLR452C	SST2	YLR452C
YFL026W	STE2	YFL026W
YGL169W	SUA5	YGL169W
YJL176C	SWI3	YJL176C
YIL144W	TID3	YIL144W
YOL115W	PAP2	YOL115W
YDL058W	USO1	YDL058W
YBR069C	TAT1	YBR069C
YML097C	VPS9	YML097C
YAL032C	PRP45	YAL032C
YBL055C	non	YBL055C
YBR028C	non	YBR028C
YBR102C	EXO84	YBR102C
YBR216C	YBP1	YBR216C
YCL045C	non	YCL045C
YCR027C	RHB1	YCR027C
YDR036C	EHD3	YDR036C
YDR111C	ALT2	YDR111C
YDR219C	MFB1	YDR219C
YEL048C	non	YEL048C
YER080W	FMP29	YER080W
YFR048W	RMD8	YFR048W
YGL157W	non	YGL157W
YGR081C	SLX9	YGR081C
YHR073W	OSH3	YHR073W
YIL158W	non	YIL158W
YJR003C	non	YJR003C
YJR083C	ACF4	YJR083C
YKL061W	non	YKL061W
YKL088W	non	YKL088W
YKL116C	PRR1	YKL116C
YKR003W	OSH6	YKR003W
YKR023W	non	YKR023W
YLL032C	non	YLL032C
YLL038C	ENT4	YLL038C
YLR369W	SSQ1	YLR369W
YLR373C	VID22	YLR373C
YML096W	non	YML096W
YMR048W	CSM3	YMR048W
YMR178W	non	YMR178W
YMR192W	GYL1	YMR192W
YMR259C	non	YMR259C
YNL058C	non	YNL058C
YNL078W	NIS1	YNL078W
YNL155W	non	YNL155W
YNL224C	SQS1	YNL224C
YNL275W	BOR1	YNL275W
YNR014W	non	YNR014W
YPL014W	non	YPL014W
YPR091C	non	YPR091C
YPR156C	TPO3	YPR156C
YPR171W	BSP1	YPR171W
GO Enrichments
Component
GOID	GO_term	Cluster frequency	Background frequency	P-value	Gene(s) annotated to the term	Directly Annotated GOID List
44464	cell part	99 out of 100 genes, 99.0%	5495 out of 7288 background genes, 75.4%	2.68e-09	PRP45:YBL055C:YBR028C:TAT1:ALG14:EXO84:YBP1:PRP5:HSM3:YCL045C:RHB1:CTR86:USO1:NRP1:EHD3:ALT2:MFB1:BTT1:SET7:ADA2:VPS52:YEL048C:SRB4:MOT2:FMP29:STE2:RMD8:YGL157W:SUA5:HOS2:SAP4:CAX4:PRP38:SLX9:LAG1:GPA1:GIC1:OSH3:SPL2:ARO9:IKI1:SDS3:PRK1:AXL2:TID3:YIL158W:NUP82:EXO70:QCR8:SET2:SWI3:PFD1:ECM25:YJR003C:CBF1:BUD4:HMS2:YKL061W:YKL088W:CWP1:PRR1:OSH6:RSC4:YKR023W:YLL032C:ENT4:SSQ1:VID22:CNA1:SST2:NBP1:…	5854:5783:9277:46695:938:30686:142:30688:145:324:5643:5823:5750:508:5681:5933:5829:5934:5935:5759:5794:5798:30478:30479:43541:118:31499:151:119:5830:16585:16586:31315:1405:5834:5940:5768:43332:42175:16514:30015:8023:300:776:124:778:5621:19897:5624:5625:5730:16592:16593:5840:5737:5739:5773:5774:5849:5955:5886:5887:780:16272:131:30136:5634:5743:5816:16023:46540:5671:30176:31262
44424	intracellular part	90 out of 100 genes, 90.0%	5052 out of 7288 background genes, 69.3%	0.00012	PRP45:YBL055C:YBR028C:ALG14:EXO84:YBP1:PRP5:HSM3:YCL045C:CTR86:NRP1:EHD3:ALT2:MFB1:BTT1:SET7:ADA2:VPS52:YEL048C:SRB4:MOT2:FMP29:RMD8:YGL157W:SUA5:HOS2:SAP4:CAX4:PRP38:SLX9:LAG1:GPA1:GIC1:OSH3:SPL2:ARO9:IKI1:SDS3:PRK1:AXL2:TID3:YIL158W:NUP82:EXO70:QCR8:SET2:SWI3:PFD1:ECM25:YJR003C:CBF1:BUD4:HMS2:YKL061W:YKL088W:PRR1:OSH6:RSC4:YKR023W:YLL032C:ENT4:SSQ1:CNA1:NBP1:YML096W:VPS9:HOF1:CSM3:RNA14:YMR178W…	5854:5783:46695:938:30686:142:30688:145:324:5643:5823:5750:508:5681:5933:5829:5934:5935:5759:5794:5798:30478:30479:43541:118:31499:119:151:5830:16585:16586:31315:1405:5834:5940:5768:43332:16514:42175:300:8023:30015:776:124:778:5624:5625:5730:16592:16593:5840:5737:5739:5773:5774:5849:5955:5886:780:5887:16272:131:30136:5634:5743:5816:16023:46540:5671:31262:30176
5622	intracellular	90 out of 100 genes, 90.0%	5087 out of 7288 background genes, 69.8%	0.0002	PRP45:YBL055C:YBR028C:ALG14:EXO84:YBP1:PRP5:HSM3:YCL045C:CTR86:NRP1:EHD3:ALT2:MFB1:BTT1:SET7:ADA2:VPS52:YEL048C:SRB4:MOT2:FMP29:RMD8:YGL157W:SUA5:HOS2:SAP4:CAX4:PRP38:SLX9:LAG1:GPA1:GIC1:OSH3:SPL2:ARO9:IKI1:SDS3:PRK1:AXL2:TID3:YIL158W:NUP82:EXO70:QCR8:SET2:SWI3:PFD1:ECM25:YJR003C:CBF1:BUD4:HMS2:YKL061W:YKL088W:PRR1:OSH6:RSC4:YKR023W:YLL032C:ENT4:SSQ1:CNA1:NBP1:YML096W:VPS9:HOF1:CSM3:RNA14:YMR178W…	5854:5783:46695:938:30686:142:30688:145:324:5643:5823:5750:508:5681:5933:5829:5934:5935:5759:5794:5798:30478:30479:43541:118:31499:119:151:5830:16585:16586:31315:1405:5834:5940:5768:43332:16514:42175:300:8023:30015:776:124:778:5624:5625:5730:16592:16593:5840:5737:5739:5773:5774:5849:5955:5886:780:5887:16272:131:30136:5634:5743:5816:16023:46540:5671:31262:30176
44448	cell cortex part	9 out of 100 genes, 9.0%	88 out of 7288 background genes, 1.2%	0.0005	EXO84:GIC1:PRK1:AXL2:EXO70:BUD4:ENT4:HOF1:BSP1	142:145:5934:5935:30478:30479:5940:43332:5624:5887:131
5938	cell cortex	9 out of 100 genes, 9.0%	100 out of 7288 background genes, 1.4%	0.00146	EXO84:GIC1:PRK1:AXL2:EXO70:BUD4:ENT4:HOF1:BSP1	142:145:5934:5935:30478:30479:5940:43332:5624:5887:131
5737	cytoplasm	72 out of 100 genes, 72.0%	3694 out of 7288 background genes, 50.7%	0.00183	YBL055C:YBR028C:ALG14:EXO84:YBP1:HSM3:YCL045C:CTR86:NRP1:EHD3:ALT2:MFB1:BTT1:VPS52:YEL048C:MOT2:FMP29:RMD8:YGL157W:SUA5:SAP4:CAX4:SLX9:LAG1:GPA1:GIC1:OSH3:SPL2:ARO9:IKI1:PRK1:AXL2:YIL158W:EXO70:QCR8:PFD1:ECM25:YJR003C:CBF1:BUD4:HMS2:YKL061W:YKL088W:PRR1:OSH6:YKR023W:YLL032C:ENT4:SSQ1:CNA1:NBP1:YML096W:VPS9:HOF1:RNA14:YMR178W:GYL1:YMR259C:YNL058C:YNL155W:SQS1:SEC2:BOR1:MDJ2:YNR014W:CPR8:SOL1:CSI2:…	5854:5783:938:30686:142:30688:145:324:5823:5750:5933:5829:5934:5935:5759:5794:5798:30478:30479:43541:151:5830:31315:1405:5834:5940:5768:43332:42175:300:8023:30015:776:5624:5625:5730:5840:5737:5739:5773:5774:5849:5955:5886:5887:16272:131:30136:5634:5743:5816:16023:30176
5935	bud neck	9 out of 100 genes, 9.0%	112 out of 7288 background genes, 1.5%	0.00368	EXO84:GIC1:AXL2:BUD4:HOF1:GYL1:NIS1:CSI2:BSP1	142:145:324:5933:5934:5935:5798:30478:30479:5940:43332:5624:5737:5739:5886:5887:131:5634
Bi-Cluster 5	score = 320
				Mean pattern, and conditions
YDR448W	ADA2	YDR448W
YPR180W	AOS1	YPR180W
YDR252W	BTT1	YDR252W
YJR060W	CBF1	YJR060W
YLR433C	CNA1	YLR433C
YJR032W	CPR7	YJR032W
YOL007C	CSI2	YOL007C
YPR124W	CTR1	YPR124W
YCR054C	CTR86	YCR054C
YOL145C	CTR9	YOL145C
YGR036C	CAX4	YGR036C
YMR032W	HOF1	YMR032W
YJL201W	ECM25	YJL201W
YNL327W	EGT2	YNL327W
YJL085W	EXO70	YJL085W
YJL168C	SET2	YJL168C
YCR028C	FEN2	YCR028C
YMR319C	FET4	YMR319C
YKL173W	SNU114	YKL173W
YHR005C	GPA1	YHR005C
YOL059W	GPD2	YOL059W
YJR147W	HMS2	YJR147W
YGL194C	HOS2	YGL194C
YHR187W	IKI1	YHR187W
YPL263C	KEL3	YPL263C
YHL003C	LAG1	YHL003C
YNL328C	MDJ2	YNL328C
YLR457C	NBP1	YLR457C
YDL167C	NRP1	YDL167C
YJL061W	NUP82	YJL061W
YJL179W	PFD1	YJL179W
YIL095W	PRK1	YIL095W
YGR075C	PRP38	YGR075C
YBR237W	PRP5	YBR237W
YDR257C	SET7	YDR257C
YMR061W	RNA14	YMR061W
YCR035C	RRP43	YCR035C
YDR484W	VPS52	YDR484W
YGL229C	SAP4	YGL229C
YIL084C	SDS3	YIL084C
YNL272C	SEC2	YNL272C
YER068W	MOT2	YER068W
YNR034W	SOL1	YNR034W
YHR136C	SPL2	YHR136C
YER022W	SRB4	YER022W
YIL140W	AXL2	YIL140W
YLR452C	SST2	YLR452C
YHR084W	STE12	YHR084W
YFL026W	STE2	YFL026W
YGL169W	SUA5	YGL169W
YNL066W	SUN4	YNL066W
YJL176C	SWI3	YJL176C
YDR161W	non	YDR161W
YIL144W	TID3	YIL144W
YGL145W	TIP20	YGL145W
YOL115W	PAP2	YOL115W
YJL087C	TRL1	YJL087C
YDR207C	UME6	YDR207C
YBR069C	TAT1	YBR069C
YML097C	VPS9	YML097C
YAL032C	PRP45	YAL032C
YBL055C	non	YBL055C
YBR028C	non	YBR028C
YBR102C	EXO84	YBR102C
YBR216C	YBP1	YBR216C
YCR027C	RHB1	YCR027C
YCR057C	PWP2	YCR057C
YDL123W	SNA4	YDL123W
YDR036C	EHD3	YDR036C
YDR049W	non	YDR049W
YDR111C	ALT2	YDR111C
YDR219C	MFB1	YDR219C
YDR524C	AGE1	YDR524C
YDR527W	RBA50	YDR527W
YDR528W	HLR1	YDR528W
YEL048C	non	YEL048C
YER080W	FMP29	YER080W
YFL023W	BUD27	YFL023W
YFR048W	RMD8	YFR048W
YGL157W	non	YGL157W
YGL246C	RAI1	YGL246C
YGR081C	SLX9	YGR081C
YGR103W	NOP7	YGR103W
YHR073W	OSH3	YHR073W
YHR085W	IPI1	YHR085W
YIL104C	SHQ1	YIL104C
YIL117C	PRM5	YIL117C
YIL145C	PAN6	YIL145C
YJL212C	OPT1	YJL212C
YJR003C	non	YJR003C
YJR083C	ACF4	YJR083C
YKL061W	non	YKL061W
YKL088W	non	YKL088W
YKL116C	PRR1	YKL116C
YKR023W	non	YKR023W
YKR045C	non	YKR045C
YKR079C	TRZ1	YKR079C
YLL032C	non	YLL032C
YLL038C	ENT4	YLL038C
YLR022C	SDO1	YLR022C
YLR369W	SSQ1	YLR369W
YLR405W	DUS4	YLR405W
YLR413W	non	YLR413W
YLR435W	TSR2	YLR435W
YML005W	TRM12	YML005W
YML082W	non	YML082W
YML096W	non	YML096W
YMR048W	CSM3	YMR048W
YMR178W	non	YMR178W
YMR192W	GYL1	YMR192W
YMR259C	non	YMR259C
YNL058C	non	YNL058C
YNL065W	AQR1	YNL065W
YNL078W	NIS1	YNL078W
YNL155W	non	YNL155W
YNL158W	PGA1	YNL158W
YNL191W	DUG3	YNL191W
YNL224C	SQS1	YNL224C
YNL245C	CWC25	YNL245C
YNR014W	non	YNR014W
YOL041C	NOP12	YOL041C
YOL144W	NOP8	YOL144W
YOR206W	NOC2	YOR206W
YPR091C	non	YPR091C
YPR156C	TPO3	YPR156C
YPR171W	BSP1	YPR171W
GO Enrichments
Process
GOID	GO_term	Cluster frequency	Background frequency	P-value	Gene(s) annotated to the term	Directly Annotated GOID List
6396	RNA processing	21 out of 126 genes, 16.7%	368 out of 7288 background genes, 5.0%	0.00054	PRP45:EXO84:PRP5:RRP43:PWP2:MOT2:RAI1:PRP38:SLX9:NOP7:IPI1:TRL1:SNU114:TRZ1:SDO1:TSR2:RNA14:CWC25:SOL1:PAP2:NOP8	910:289:30468:45944:398:30489:6402:30846:7064:6409:7049:6265:43629:6357:6378:6379:27:349:8283:723:42779:16070:30490:16075:42254:16076:747:16077:16078:42273:6887:8033:43630:43634:7076:245:16567:6364:30969:6365:6368:370:6388
16043	cellular component organization and biogenesis	62 out of 126 genes, 49.2%	2183 out of 7288 background genes, 30.0%	0.00188	YBL055C:EXO84:PRP5:RHB1:FEN2:RRP43:PWP2:NRP1:EHD3:YDR161W:UME6:MFB1:ADA2:VPS52:AGE1:HLR1:MOT2:BUD27:STE2:TIP20:HOS2:RAI1:CAX4:SLX9:NOP7:OSH3:STE12:IPI1:SDS3:PRK1:AXL2:TID3:NUP82:EXO70:SET2:SWI3:PFD1:ECM25:YJR003C:CBF1:ACF4:HMS2:SNU114:ENT4:SDO1:CNA1:TSR2:NBP1:VPS9:CSM3:GYL1:FET4:SUN4:PGA1:SEC2:MDJ2:SOL1:PAP2:NOP8:CTR9:NOC2:BSP1	289:7020:76:6873:30468:754:398:30469:30100:45132:7131:6402:17157:30031:6333:6406:6511:6407:7064:30036:6408:15809:16571:6409:6265:6338:16573:147:15918:7068:6623:16575:40:48228:723:30437:15887:6487:16070:16075:7103:16076:16077:16078:42273:6887:6888:6309:6342:30150:15819:6999:42493:7076:15677:7329:1403:6457:370:54:910:30447:7001:45835:45836:7005:6890:6891:6893:30489:45045:30846:6896:6897:7047:15680:…
Component
GOID	GO_term	Cluster frequency	Background frequency	P-value	Gene(s) annotated to the term	Directly Annotated GOID List
44464	cell part	123 out of 126 genes, 97.6%	5495 out of 7288 background genes, 75.4%	5.67e-10	PRP45:YBL055C:YBR028C:TAT1:EXO84:YBP1:PRP5:RHB1:FEN2:RRP43:CTR86:PWP2:SNA4:NRP1:EHD3:YDR049W:ALT2:YDR161W:UME6:MFB1:BTT1:SET7:ADA2:VPS52:AGE1:RBA50:HLR1:YEL048C:SRB4:MOT2:FMP29:BUD27:STE2:RMD8:TIP20:YGL157W:SUA5:HOS2:SAP4:RAI1:CAX4:PRP38:SLX9:NOP7:LAG1:GPA1:OSH3:STE12:IPI1:SPL2:IKI1:SDS3:PRK1:SHQ1:PRM5:AXL2:TID3:PAN6:NUP82:EXO70:TRL1:SET2:SWI3:PFD1:ECM25:OPT1:YJR003C:CPR7:CBF1:HMS2:YKL061W:YKL088…	5854:5783:9277:46695:938:30686:142:30688:145:324:5643:5823:329:508:5681:5933:5682:5829:5934:5935:5759:5794:5798:30479:30690:30691:118:31499:151:119:5830:16585:5654:31315:1405:5834:5940:5768:16514:30015:8023:776:124:778:19897:5624:5730:5732:16592:16593:5840:5737:5739:5774:5849:5955:5886:5887:780:16272:131:30136:5634:5635:16021:5637:5743:5816:16023:176:5671:46540:177:30176:31262
44424	intracellular part	113 out of 126 genes, 89.7%	5052 out of 7288 background genes, 69.3%	7.2e-06	PRP45:YBL055C:YBR028C:EXO84:YBP1:PRP5:RRP43:CTR86:PWP2:SNA4:NRP1:EHD3:YDR049W:ALT2:YDR161W:UME6:MFB1:BTT1:SET7:ADA2:VPS52:AGE1:RBA50:HLR1:YEL048C:SRB4:MOT2:FMP29:BUD27:RMD8:TIP20:YGL157W:SUA5:HOS2:SAP4:RAI1:CAX4:PRP38:SLX9:NOP7:LAG1:GPA1:OSH3:STE12:IPI1:SPL2:IKI1:SDS3:PRK1:SHQ1:AXL2:TID3:PAN6:NUP82:EXO70:TRL1:SET2:SWI3:PFD1:ECM25:OPT1:YJR003C:CPR7:CBF1:HMS2:YKL061W:YKL088W:PRR1:SNU114:YKR023W:YKR…	5854:5783:9277:46695:938:30686:142:30688:145:324:5643:5823:329:508:5681:5933:5682:5829:5934:5935:5759:5794:5798:30479:30690:30691:118:31499:119:151:5830:16585:5654:31315:1405:5834:5940:5768:16514:8023:30015:776:124:778:5624:5730:5732:16592:16593:5840:5737:5739:5774:5849:5955:5886:780:5887:16272:131:30136:5634:5635:5637:5743:5816:16023:46540:5671:176:177:31262:30176
5622	intracellular	113 out of 126 genes, 89.7%	5087 out of 7288 background genes, 69.8%	1.3e-05	PRP45:YBL055C:YBR028C:EXO84:YBP1:PRP5:RRP43:CTR86:PWP2:SNA4:NRP1:EHD3:YDR049W:ALT2:YDR161W:UME6:MFB1:BTT1:SET7:ADA2:VPS52:AGE1:RBA50:HLR1:YEL048C:SRB4:MOT2:FMP29:BUD27:RMD8:TIP20:YGL157W:SUA5:HOS2:SAP4:RAI1:CAX4:PRP38:SLX9:NOP7:LAG1:GPA1:OSH3:STE12:IPI1:SPL2:IKI1:SDS3:PRK1:SHQ1:AXL2:TID3:PAN6:NUP82:EXO70:TRL1:SET2:SWI3:PFD1:ECM25:OPT1:YJR003C:CPR7:CBF1:HMS2:YKL061W:YKL088W:PRR1:SNU114:YKR023W:YKR…	5854:5783:9277:46695:938:30686:142:30688:145:324:5643:5823:329:508:5681:5933:5682:5829:5934:5935:5759:5794:5798:30479:30690:30691:118:31499:119:151:5830:16585:5654:31315:1405:5834:5940:5768:16514:8023:30015:776:124:778:5624:5730:5732:16592:16593:5840:5737:5739:5774:5849:5955:5886:780:5887:16272:131:30136:5634:5635:5637:5743:5816:16023:46540:5671:176:177:31262:30176
Bi-Cluster 6	score = 438
				Mean pattern, and conditions
YDR448W	ADA2	YDR448W
YMR300C	ADE4	YMR300C
YBL069W	AST1	YBL069W
YJR032W	CPR7	YJR032W
YOL007C	CSI2	YOL007C
YPR124W	CTR1	YPR124W
YCR054C	CTR86	YCR054C
YOL145C	CTR9	YOL145C
YGR036C	CAX4	YGR036C
YGL078C	DBP3	YGL078C
YFL001W	DEG1	YFL001W
YGL061C	DUO1	YGL061C
YJL201W	ECM25	YJL201W
YJL168C	SET2	YJL168C
YMR319C	FET4	YMR319C
YHR005C	GPA1	YHR005C
YOL059W	GPD2	YOL059W
YOL056W	GPM3	YOL056W
YJR147W	HMS2	YJR147W
YGL194C	HOS2	YGL194C
YHR187W	IKI1	YHR187W
YPL263C	KEL3	YPL263C
YHL003C	LAG1	YHL003C
YDR503C	LPP1	YDR503C
YKL021C	MAK11	YKL021C
YDL003W	MCD1	YDL003W
YNL328C	MDJ2	YNL328C
YOL090W	MSH2	YOL090W
YLR457C	NBP1	YLR457C
YPL124W	SPC29	YPL124W
YPL043W	NOP4	YPL043W
YDL167C	NRP1	YDL167C
YGR159C	NSR1	YGR159C
YER149C	PEA2	YER149C
YJL179W	PFD1	YJL179W
YEL055C	POL5	YEL055C
YIL095W	PRK1	YIL095W
YGR075C	PRP38	YGR075C
YML046W	PRP39	YML046W
YDR257C	SET7	YDR257C
YJR063W	RPA12	YJR063W
YOR340C	RPA43	YOR340C
YGR152C	RSR1	YGR152C
YJL098W	SAP185	YJL098W
YIL084C	SDS3	YIL084C
YHR136C	SPL2	YHR136C
YIL140W	AXL2	YIL140W
YHR066W	SSF1	YHR066W
YLR452C	SST2	YLR452C
YFL026W	STE2	YFL026W
YGL169W	SUA5	YGL169W
YDR161W	non	YDR161W
YIL144W	TID3	YIL144W
YOL115W	PAP2	YOL115W
YEL040W	UTR2	YEL040W
YBR069C	TAT1	YBR069C
YML097C	VPS9	YML097C
YAL019W	FUN30	YAL019W
YBL055C	non	YBL055C
YBR028C	non	YBR028C
YCR027C	RHB1	YCR027C
YCR043C	non	YCR043C
YCR057C	PWP2	YCR057C
YDR049W	non	YDR049W
YDR101C	ARX1	YDR101C
YDR361C	BCP1	YDR361C
YDR398W	UTP5	YDR398W
YDR449C	UTP6	YDR449C
YDR527W	RBA50	YDR527W
YDR528W	HLR1	YDR528W
YEL048C	non	YEL048C
YER049W	TPA1	YER049W
YFL023W	BUD27	YFL023W
YFR041C	ERJ5	YFR041C
YFR048W	RMD8	YFR048W
YGL157W	non	YGL157W
YGL246C	RAI1	YGL246C
YGR081C	SLX9	YGR081C
YGR103W	NOP7	YGR103W
YGR128C	UTP8	YGR128C
YGR173W	RBG2	YGR173W
YGR251W	non	YGR251W
YHR046C	INM1	YHR046C
YHR049W	FSH1	YHR049W
YHR073W	OSH3	YHR073W
YHR085W	IPI1	YHR085W
YHR149C	SKG6	YHR149C
YHR196W	UTP9	YHR196W
YHR197W	RIX1	YHR197W
YIL091C	non	YIL091C
YIL104C	SHQ1	YIL104C
YIL145C	PAN6	YIL145C
YJL010C	NOP9	YJL010C
YJL212C	OPT1	YJL212C
YJR097W	JJJ3	YJR097W
YKR060W	UTP30	YKR060W
YKR079C	TRZ1	YKR079C
YLL038C	ENT4	YLL038C
YLR002C	NOC3	YLR002C
YLR022C	SDO1	YLR022C
YLR073C	non	YLR073C
YLR221C	RSA3	YLR221C
YLR222C	UTP13	YLR222C
YLR405W	DUS4	YLR405W
YLR413W	non	YLR413W
YLR435W	TSR2	YLR435W
YML005W	TRM12	YML005W
YML080W	DUS1	YML080W
YML093W	UTP14	YML093W
YML096W	non	YML096W
YMR048W	CSM3	YMR048W
YMR093W	UTP15	YMR093W
YMR192W	GYL1	YMR192W
YMR259C	non	YMR259C
YNL065W	AQR1	YNL065W
YNL155W	non	YNL155W
YNL166C	BNI5	YNL166C
YNL224C	SQS1	YNL224C
YNL245C	CWC25	YNL245C
YNL313C	non	YNL313C
YNR014W	non	YNR014W
YOL041C	NOP12	YOL041C
YOL080C	REX4	YOL080C
YOL124C	TRM11	YOL124C
YOL144W	NOP8	YOL144W
YOR206W	NOC2	YOR206W
YPL126W	NAN1	YPL126W
YPL183C	non	YPL183C
YPR156C	TPO3	YPR156C
YPR171W	BSP1	YPR171W
YIR026C	YVH1	YIR026C
GO Enrichments
Process
GOID	GO_term	Cluster frequency	Background frequency	P-value	Gene(s) annotated to the term	Directly Annotated GOID List
42254	ribosome biogenesis and assembly	38 out of 131 genes, 29.0%	330 out of 7288 background genes, 4.5%	1.59e-18	PWP2:NRP1:ARX1:YDR161W:BCP1:UTP5:UTP6:TPA1:DBP3:RAI1:SLX9:NOP7:UTP8:NSR1:YGR251W:SSF1:IPI1:UTP9:RIX1:YVH1:NOP9:RPA12:MAK11:UTP30:NOC3:SDO1:RSA3:UTP13:TSR2:UTP14:UTP15:REX4:TRM11:NOP8:NOC2:RPA43:NOP4:NAN1	30437:723:54:910:16070:55:288:30490:30468:42254:42255:747:5977:30488:42273:30489:6402:30846:7126:6270:6360:6611:7049:6451:6364:6365:8361:27:28:8283
22613	ribonucleoprotein complex biogenesis and assembly	39 out of 131 genes, 29.8%	400 out of 7288 background genes, 5.5%	1.79e-16	PWP2:NRP1:ARX1:YDR161W:BCP1:UTP5:UTP6:TPA1:DBP3:RAI1:SLX9:NOP7:UTP8:NSR1:YGR251W:SSF1:IPI1:UTP9:RIX1:YVH1:NOP9:RPA12:MAK11:UTP30:NOC3:SDO1:RSA3:UTP13:TSR2:PRP39:UTP14:UTP15:REX4:TRM11:NOP8:NOC2:RPA43:NOP4:NAN1	30437:723:54:910:16070:55:288:395:30490:30468:42254:42255:747:5977:30488:42273:30489:6402:30846:7126:6270:6360:7049:6611:6451:6364:6365:8361:27:28:8283
6364	rRNA processing	26 out of 131 genes, 19.8%	176 out of 7288 background genes, 2.4%	1.49e-14	PWP2:UTP5:UTP6:DBP3:RAI1:SLX9:NOP7:UTP8:NSR1:YGR251W:IPI1:UTP9:RIX1:NOP9:MAK11:UTP30:NOC3:SDO1:UTP13:TSR2:UTP14:UTP15:REX4:NOP8:NOP4:NAN1	723:54:910:16070:30490:30468:42254:42255:42273:30489:30846:6270:7049:6364:6365:27:28:8283
6996	organelle organization and biogenesis	64 out of 131 genes, 48.9%	1293 out of 7288 background genes, 17.7%	9.06e-14	FUN30:YBL055C:PWP2:MCD1:NRP1:ARX1:YDR161W:BCP1:UTP5:ADA2:UTP6:TPA1:PEA2:ERJ5:DUO1:DBP3:HOS2:RAI1:CAX4:SLX9:NOP7:UTP8:NSR1:YGR251W:SSF1:OSH3:IPI1:UTP9:RIX1:SDS3:PRK1:TID3:YVH1:NOP9:SET2:PFD1:RPA12:MAK11:UTP30:ENT4:NOC3:SDO1:RSA3:UTP13:TSR2:NBP1:UTP14:VPS9:CSM3:UTP15:BNI5:YNL313C:REX4:MSH2:PAP2:TRM11:NOP8:CTR9:NOC2:RPA43:NOP4:SPC29:NAN1:BSP1	288:30466:7020:76:30468:30469:30100:45132:6402:7064:16571:6265:16573:147:15918:6623:16575:48228:30437:723:6487:16070:30472:16075:7103:31384:16076:31385:16077:5977:16078:42273:6887:6309:6342:6270:6451:7076:1403:6457:910:54:55:30447:7001:45835:735:6310:6311:30488:6312:30489:30846:6897:7049:6354:6355:43629:7266:27:6468:8283:28:742:921:7010:30490:42254:42255:7015:747:7121:7124:31110:7126:43630:6325:6…
16072	rRNA metabolic process	28 out of 131 genes, 21.4%	257 out of 7288 background genes, 3.5%	2.63e-12	PWP2:UTP5:UTP6:DBP3:RAI1:SLX9:NOP7:UTP8:NSR1:YGR251W:IPI1:UTP9:RIX1:NOP9:MAK11:UTP30:NOC3:SDO1:UTP13:TSR2:UTP14:UTP15:NOP12:REX4:PAP2:NOP8:NOP4:NAN1	30468:7064:6265:723:16070:16072:16075:16076:16077:16078:42273:6270:7076:54:910:30489:30846:7049:43629:27:28:8283:30490:42254:42255:43630:43634:6364:6365
6396	RNA processing	32 out of 131 genes, 24.4%	368 out of 7288 background genes, 5.0%	1.45e-11	PWP2:UTP5:UTP6:DEG1:DBP3:RAI1:PRP38:SLX9:NOP7:UTP8:NSR1:YGR251W:IPI1:UTP9:RIX1:NOP9:MAK11:UTP30:TRZ1:NOC3:SDO1:UTP13:TSR2:PRP39:UTP14:UTP15:CWC25:REX4:PAP2:NOP8:NOP4:NAN1	395:30468:398:7064:6265:42779:723:16070:16075:16076:16077:16078:42273:6270:7076:54:910:30489:30846:7049:43629:27:28:8283:6396:30490:42254:42255:43630:43634:6364:6365
16043	cellular component organization and biogenesis	78 out of 131 genes, 59.5%	2183 out of 7288 background genes, 30.0%	6.56e-10	FUN30:YBL055C:AST1:RHB1:PWP2:MCD1:NRP1:ARX1:YDR161W:BCP1:UTP5:ADA2:UTP6:HLR1:UTR2:TPA1:PEA2:BUD27:STE2:ERJ5:DUO1:DBP3:HOS2:RAI1:CAX4:SLX9:NOP7:UTP8:RSR1:NSR1:YGR251W:SSF1:OSH3:IPI1:UTP9:RIX1:SDS3:PRK1:AXL2:TID3:YVH1:NOP9:SET2:PFD1:ECM25:RPA12:HMS2:MAK11:UTP30:ENT4:NOC3:SDO1:RSA3:UTP13:TSR2:NBP1:PRP39:UTP14:VPS9:CSM3:UTP15:GYL1:FET4:BNI5:YNL313C:MDJ2:REX4:MSH2:PAP2:TRM11:NOP8:CTR9:NOC2:RPA43:NOP4:…	288:30466:395:7020:76:30468:30469:30100:45132:6402:17157:30031:7064:15809:16571:6265:16573:147:15918:6623:16575:40:48228:30437:723:6487:16070:30472:16075:7103:31384:16076:31385:16077:5977:16078:42273:6887:6888:6309:6342:6270:30150:15819:42493:6451:7076:15677:1403:6457:54:910:30447:55:45835:7001:735:6310:6311:30488:6312:30489:30846:6897:7047:15680:7049:6354:6355:43629:7264:7266:6468:27:28:8283:742…
16070	RNA metabolic process	49 out of 131 genes, 37.4%	1022 out of 7288 background genes, 14.0%	7.21e-09	PWP2:UTP5:UTP6:RBA50:POL5:TPA1:DEG1:DBP3:HOS2:RAI1:PRP38:SLX9:NOP7:UTP8:NSR1:YGR251W:IPI1:IKI1:UTP9:RIX1:SDS3:SHQ1:NOP9:SET2:RPA12:MAK11:UTP30:TRZ1:NOC3:SDO1:UTP13:DUS4:TSR2:TRM12:PRP39:DUS1:UTP14:UTP15:CWC25:NOP12:REX4:MSH2:PAP2:TRM11:NOP8:CTR9:RPA43:NOP4:NAN1	288:30466:395:30468:398:6400:6402:7064:16571:6265:16575:42779:30437:723:16070:16072:16074:16075:16076:16077:16078:42273:6342:6270:6451:7076:54:910:45835:735:6310:6311:6312:30488:30489:30846:7049:6354:6355:43629:6357:27:28:8283:6396:30490:42254:42255:43630:6325:6360:43634:7059:9303:6364:6365:6366:6368:710:6298
30490	processing of 20S pre-rRNA	11 out of 131 genes, 8.4%	44 out of 7288 background genes, 0.6%	9.14e-08	PWP2:UTP5:UTP6:NOP7:UTP8:UTP9:UTP13:TSR2:UTP14:UTP15:NAN1	30468:42273:910:7049:8283:30490:42254:6365
6139	nucleobase, nucleoside, nucleotide and nucleic acid metabolic process	54 out of 131 genes, 41.2%	1510 out of 7288 background genes, 20.7%	2.89e-05	YBL055C:PWP2:UTP5:ADA2:UTP6:RBA50:POL5:TPA1:DEG1:DBP3:HOS2:RAI1:PRP38:SLX9:NOP7:UTP8:NSR1:YGR251W:IPI1:IKI1:UTP9:RIX1:SDS3:SHQ1:NOP9:SET2:RPA12:MAK11:UTP30:TRZ1:NOC3:SDO1:UTP13:DUS4:TSR2:TRM12:PRP39:DUS1:UTP14:CSM3:UTP15:ADE4:CWC25:NOP12:GPD2:REX4:MSH2:PAP2:TRM11:NOP8:CTR9:RPA43:NOP4:NAN1	288:30466:395:76:30468:398:6116:45132:6400:6402:7064:16571:6265:16573:16575:42779:30437:723:16070:16072:16074:16075:16076:16077:16078:42273:6309:6164:6342:6270:6451:7076:54:910:45835:735:6310:6311:6312:30488:30489:30846:7049:6354:6355:43629:6357:27:28:8283:6396:30490:42254:42255:6071:6144:43630:6325:6979:6360:43634:7059:9303:6364:16568:6365:6366:6189:6368:710:6298
42255	ribosome assembly	10 out of 131 genes, 7.6%	65 out of 7288 background genes, 0.9%	9.18e-05	DBP3:NSR1:SSF1:IPI1:RIX1:MAK11:RSA3:REX4:NOP8:NOC2	723:42273:54:30489:27:28:42254:42255:747:6364:6365:8361
42273	ribosomal large subunit biogenesis and assembly	9 out of 131 genes, 6.9%	63 out of 7288 background genes, 0.9%	0.00073	ARX1:DBP3:NOP7:SSF1:IPI1:RIX1:MAK11:RSA3:NOP8	42273:54:30489:7049:27:8283:30490:42254:747:6364:6365:8361
42257	ribosomal subunit assembly	8 out of 131 genes, 6.1%	54 out of 7288 background genes, 0.7%	0.00217	DBP3:NSR1:SSF1:IPI1:RIX1:MAK11:RSA3:NOP8	723:42273:54:30489:27:28:42254:747:6364:6365:8361
27	ribosomal large subunit assembly and maintenance	7 out of 131 genes, 5.3%	41 out of 7288 background genes, 0.6%	0.00332	DBP3:SSF1:IPI1:RIX1:MAK11:RSA3:NOP8	42273:54:30489:27:42254:747:6364:6365:8361
Function
GOID	GO_term	Cluster frequency	Background frequency	P-value	Gene(s) annotated to the term	Directly Annotated GOID List
30515	snoRNA binding	10 out of 131 genes, 7.6%	28 out of 7288 background genes, 0.4%	4.44e-09	PWP2:UTP5:UTP6:SLX9:UTP8:UTP9:UTP13:UTP14:UTP15:NAN1	30515
Component
GOID	GO_term	Cluster frequency	Background frequency	P-value	Gene(s) annotated to the term	Directly Annotated GOID List
44464	cell part	129 out of 131 genes, 98.5%	5495 out of 7288 background genes, 75.4%	9.81e-12	FUN30:YBL055C:AST1:YBR028C:TAT1:RHB1:YCR043C:CTR86:PWP2:MCD1:NRP1:YDR049W:ARX1:YDR161W:SET7:BCP1:UTP5:ADA2:UTP6:LPP1:RBA50:HLR1:UTR2:YEL048C:POL5:TPA1:PEA2:DEG1:BUD27:STE2:ERJ5:RMD8:DUO1:DBP3:YGL157W:SUA5:HOS2:RAI1:CAX4:PRP38:SLX9:NOP7:UTP8:RSR1:NSR1:RBG2:YGR251W:LAG1:GPA1:INM1:FSH1:SSF1:OSH3:IPI1:SPL2:SKG6:IKI1:UTP9:RIX1:SDS3:YIL091C:PRK1:SHQ1:AXL2:TID3:PAN6:YVH1:NOP9:SAP185:SET2:PFD1:ECM25:OPT1…	5783:5768:9277:5876:8023:46695:124:30686:30687:778:30688:19897:19898:144:30869:5624:798:324:5730:5732:16593:5823:5736:508:5737:5842:5681:5933:5739:5829:5934:5935:5774:5685:5938:5794:5886:5798:780:30478:5887:30479:30690:16272:30691:131:133:118:31499:243:30136:228:5634:42729:16020:16021:5743:5654:5816:1405:5671:46540:5834:5940:5819:31262:30176
5730	nucleolus	28 out of 131 genes, 21.4%	303 out of 7288 background genes, 4.2%	6.2e-11	PWP2:UTP5:UTP6:POL5:DBP3:SLX9:NOP7:UTP8:NSR1:YGR251W:SSF1:UTP9:YIL091C:NOP9:RPA12:UTP30:NOC3:RSA3:UTP13:UTP14:UTP15:NOP12:REX4:NOP8:NOC2:RPA43:NOP4:NAN1	30686:30687:30688:30869:5730:5732:5736:5737:5739:30690:30691:5634
31981	nuclear lumen	37 out of 131 genes, 28.2%	602 out of 7288 background genes, 8.3%	1.68e-09	PWP2:ARX1:UTP5:ADA2:UTP6:POL5:DBP3:HOS2:SLX9:NOP7:UTP8:NSR1:YGR251W:SSF1:IPI1:IKI1:UTP9:RIX1:SDS3:YIL091C:SHQ1:NOP9:RPA12:UTP30:NOC3:RSA3:UTP13:UTP14:UTP15:NOP12:REX4:NOP8:CTR9:NOC2:RPA43:NOP4:NAN1	8023:46695:124:30686:30687:30688:30869:5730:5732:16593:5736:508:5842:5737:5739:30690:30691:118:5634:5654:5671
5634	nucleus	68 out of 131 genes, 51.9%	1994 out of 7288 background genes, 27.4%	2.91e-07	FUN30:PWP2:MCD1:ARX1:YDR161W:SET7:BCP1:UTP5:ADA2:UTP6:POL5:TPA1:DEG1:DUO1:DBP3:YGL157W:HOS2:RAI1:PRP38:SLX9:NOP7:UTP8:NSR1:YGR251W:INM1:FSH1:SSF1:IPI1:IKI1:UTP9:RIX1:SDS3:YIL091C:SHQ1:TID3:PAN6:NOP9:SET2:RPA12:JJJ3:HMS2:UTP30:TRZ1:NOC3:SDO1:RSA3:UTP13:TSR2:NBP1:PRP39:DUS1:UTP14:CSM3:UTP15:YNL155W:SQS1:CWC25:YNL313C:NOP12:REX4:MSH2:PAP2:NOP8:CTR9:NOC2:RPA43:NOP4:NAN1	5876:8023:46695:124:30686:30687:778:30688:30869:798:5730:5732:16593:5823:5736:508:5842:5737:5681:5739:5685:780:30690:30691:118:31499:243:228:42729:5634:5816:5654:46540:5671:5819:31262
44424	intracellular part	118 out of 131 genes, 90.1%	5052 out of 7288 background genes, 69.3%	1.79e-06	FUN30:YBL055C:YBR028C:YCR043C:CTR86:PWP2:MCD1:NRP1:YDR049W:ARX1:YDR161W:SET7:BCP1:UTP5:ADA2:UTP6:RBA50:HLR1:UTR2:YEL048C:POL5:TPA1:PEA2:DEG1:BUD27:ERJ5:RMD8:DUO1:DBP3:YGL157W:SUA5:HOS2:RAI1:CAX4:PRP38:SLX9:NOP7:UTP8:NSR1:RBG2:YGR251W:LAG1:GPA1:INM1:FSH1:SSF1:OSH3:IPI1:SPL2:SKG6:IKI1:UTP9:RIX1:SDS3:YIL091C:PRK1:SHQ1:AXL2:TID3:PAN6:YVH1:NOP9:SAP185:SET2:PFD1:ECM25:OPT1:CPR7:RPA12:JJJ3:HMS2:UTP30:TR…	5783:5768:9277:5876:8023:46695:124:30686:30687:778:30688:144:5624:30869:798:324:5730:5732:16593:5823:5736:508:5842:5737:5681:5933:5739:5829:5934:5935:5774:5685:5938:5794:5886:5798:780:5887:30478:30479:30690:16272:30691:131:133:118:31499:243:30136:228:42729:5634:16021:5743:5816:5654:1405:46540:5671:5834:5940:5819:31262:30176
5622	intracellular	118 out of 131 genes, 90.1%	5087 out of 7288 background genes, 69.8%	3.36e-06	FUN30:YBL055C:YBR028C:YCR043C:CTR86:PWP2:MCD1:NRP1:YDR049W:ARX1:YDR161W:SET7:BCP1:UTP5:ADA2:UTP6:RBA50:HLR1:UTR2:YEL048C:POL5:TPA1:PEA2:DEG1:BUD27:ERJ5:RMD8:DUO1:DBP3:YGL157W:SUA5:HOS2:RAI1:CAX4:PRP38:SLX9:NOP7:UTP8:NSR1:RBG2:YGR251W:LAG1:GPA1:INM1:FSH1:SSF1:OSH3:IPI1:SPL2:SKG6:IKI1:UTP9:RIX1:SDS3:YIL091C:PRK1:SHQ1:AXL2:TID3:PAN6:YVH1:NOP9:SAP185:SET2:PFD1:ECM25:OPT1:CPR7:RPA12:JJJ3:HMS2:UTP30:TR…	5783:5768:9277:5876:8023:46695:124:30686:30687:778:30688:144:5624:30869:798:324:5730:5732:16593:5823:5736:508:5842:5737:5681:5933:5739:5829:5934:5935:5774:5685:5938:5794:5886:5798:780:5887:30478:30479:30690:16272:30691:131:133:118:31499:243:30136:228:42729:5634:16021:5743:5816:5654:1405:46540:5671:5834:5940:5819:31262:30176
44428	nuclear part	45 out of 131 genes, 34.4%	1105 out of 7288 background genes, 15.2%	5.15e-06	PWP2:MCD1:ARX1:UTP5:ADA2:UTP6:POL5:DUO1:DBP3:HOS2:PRP38:SLX9:NOP7:UTP8:NSR1:YGR251W:SSF1:IPI1:IKI1:UTP9:RIX1:SDS3:YIL091C:SHQ1:TID3:NOP9:RPA12:UTP30:NOC3:RSA3:UTP13:PRP39:UTP14:UTP15:CWC25:NOP12:REX4:MSH2:PAP2:NOP8:CTR9:NOC2:RPA43:NOP4:NAN1	5876:8023:46695:124:30686:30687:778:30688:30869:798:5730:5732:16593:5736:508:5842:5737:5681:5739:5685:780:30690:30691:118:31499:243:228:42729:5634:5816:5654:46540:5671:5819:31262
31974	membrane-enclosed lumen	37 out of 131 genes, 28.2%	818 out of 7288 background genes, 11.2%	9.69e-06	PWP2:ARX1:UTP5:ADA2:UTP6:POL5:DBP3:HOS2:SLX9:NOP7:UTP8:NSR1:YGR251W:SSF1:IPI1:IKI1:UTP9:RIX1:SDS3:YIL091C:SHQ1:NOP9:RPA12:UTP30:NOC3:RSA3:UTP13:UTP14:UTP15:NOP12:REX4:NOP8:CTR9:NOC2:RPA43:NOP4:NAN1	8023:46695:124:30686:30687:30688:30869:5730:5732:16593:5736:508:5842:5737:5739:30690:30691:118:5634:5654:5671
43233	organelle lumen	37 out of 131 genes, 28.2%	818 out of 7288 background genes, 11.2%	9.69e-06	PWP2:ARX1:UTP5:ADA2:UTP6:POL5:DBP3:HOS2:SLX9:NOP7:UTP8:NSR1:YGR251W:SSF1:IPI1:IKI1:UTP9:RIX1:SDS3:YIL091C:SHQ1:NOP9:RPA12:UTP30:NOC3:RSA3:UTP13:UTP14:UTP15:NOP12:REX4:NOP8:CTR9:NOC2:RPA43:NOP4:NAN1	8023:46695:124:30686:30687:30688:30869:5730:5732:16593:5736:508:5842:5737:5739:30690:30691:118:5634:5654:5671
43228	non-membrane-bound organelle	42 out of 131 genes, 32.1%	1025 out of 7288 background genes, 14.1%	1.55e-05	PWP2:MCD1:ARX1:UTP5:UTP6:UTR2:POL5:PEA2:DUO1:DBP3:SLX9:NOP7:UTP8:NSR1:YGR251W:SSF1:UTP9:YIL091C:PRK1:AXL2:TID3:NOP9:RPA12:UTP30:ENT4:NOC3:RSA3:UTP13:NBP1:UTP14:UTP15:BNI5:NOP12:REX4:MSH2:NOP8:NOC2:RPA43:NOP4:SPC29:NAN1:BSP1	9277:5876:30686:30687:778:30688:144:5624:30869:798:5730:5732:5823:5736:5842:5737:5739:5934:5935:780:5887:30478:30479:30690:30691:133:228:42729:5634:5816:5654:5940:5819:31262
43232	intracellular non-membrane-bound organelle	42 out of 131 genes, 32.1%	1025 out of 7288 background genes, 14.1%	1.55e-05	PWP2:MCD1:ARX1:UTP5:UTP6:UTR2:POL5:PEA2:DUO1:DBP3:SLX9:NOP7:UTP8:NSR1:YGR251W:SSF1:UTP9:YIL091C:PRK1:AXL2:TID3:NOP9:RPA12:UTP30:ENT4:NOC3:RSA3:UTP13:NBP1:UTP14:UTP15:BNI5:NOP12:REX4:MSH2:NOP8:NOC2:RPA43:NOP4:SPC29:NAN1:BSP1	9277:5876:30686:30687:778:30688:144:5624:30869:798:5730:5732:5823:5736:5842:5737:5739:5934:5935:780:5887:30478:30479:30690:30691:133:228:42729:5634:5816:5654:5940:5819:31262
44452	nucleolar part	15 out of 131 genes, 11.5%	174 out of 7288 background genes, 2.4%	7.39e-05	PWP2:UTP5:UTP6:SLX9:UTP8:UTP9:RPA12:NOC3:RSA3:UTP13:UTP14:UTP15:NOC2:RPA43:NAN1	30686:30687:30688:30869:5730:5732:5736:5737:5739:30690:30691:5634
30685	nucleolar preribosome	5 out of 131 genes, 3.8%	14 out of 7288 background genes, 0.2%	0.00051	PWP2:SLX9:NOC3:RSA3:NOC2	30686:30687:30688:5730:5732:5737:5739:30690:30691:5634
30684	preribosome	5 out of 131 genes, 3.8%	15 out of 7288 background genes, 0.2%	0.00076	PWP2:SLX9:NOC3:RSA3:NOC2	30686:30687:30688:5730:5732:5737:5739:30690:30691:5634
Bi-Cluster 7	score = 513
				Mean pattern, and conditions
YNL141W	AAH1	YNL141W
YGL119W	ABC1	YGL119W
YDR448W	ADA2	YDR448W
YMR300C	ADE4	YMR300C
YPR060C	ARO7	YPR060C
YBL069W	AST1	YBL069W
YDR252W	BTT1	YDR252W
YER168C	CCA1	YER168C
YJR032W	CPR7	YJR032W
YOL007C	CSI2	YOL007C
YPR124W	CTR1	YPR124W
YCR054C	CTR86	YCR054C
YOL145C	CTR9	YOL145C
YGR036C	CAX4	YGR036C
YFL001W	DEG1	YFL001W
YGL061C	DUO1	YGL061C
YJL201W	ECM25	YJL201W
YGR207C	non	YGR207C
YJL085W	EXO70	YJL085W
YJL168C	SET2	YJL168C
YMR058W	FET3	YMR058W
YMR319C	FET4	YMR319C
YHR061C	GIC1	YHR061C
YHR005C	GPA1	YHR005C
YOL056W	GPM3	YOL056W
YJR147W	HMS2	YJR147W
YGL194C	HOS2	YGL194C
YHR187W	IKI1	YHR187W
YPL263C	KEL3	YPL263C
YGR229C	SMI1	YGR229C
YHL003C	LAG1	YHL003C
YDR503C	LPP1	YDR503C
YHR024C	MAS2	YHR024C
YDL003W	MCD1	YDL003W
YNL328C	MDJ2	YNL328C
YGR084C	MRP13	YGR084C
YDL202W	MRPL11	YDL202W
YOL090W	MSH2	YOL090W
YLR457C	NBP1	YLR457C
YPL124W	SPC29	YPL124W
YDL167C	NRP1	YDL167C
YJL061W	NUP82	YJL061W
YER149C	PEA2	YER149C
YJL179W	PFD1	YJL179W
YKL128C	PMU1	YKL128C
YIL095W	PRK1	YIL095W
YGR075C	PRP38	YGR075C
YDR257C	SET7	YDR257C
YGR152C	RSR1	YGR152C
YDR484W	VPS52	YDR484W
YGL229C	SAP4	YGL229C
YIL084C	SDS3	YIL084C
YPL083C	SEN54	YPL083C
YGR208W	SER2	YGR208W
YBR172C	SMY2	YBR172C
YMR016C	SOK2	YMR016C
YHR136C	SPL2	YHR136C
YIL140W	AXL2	YIL140W
YLR452C	SST2	YLR452C
YHR084W	STE12	YHR084W
YFL026W	STE2	YFL026W
YGL169W	SUA5	YGL169W
YJL176C	SWI3	YJL176C
YDR161W	non	YDR161W
YIL144W	TID3	YIL144W
YGL049C	TIF4632	YGL049C
YOL115W	PAP2	YOL115W
YEL040W	UTR2	YEL040W
YBR069C	TAT1	YBR069C
YML097C	VPS9	YML097C
YAL032C	PRP45	YAL032C
YBL055C	non	YBL055C
YBR028C	non	YBR028C
YBR102C	EXO84	YBR102C
YCR027C	RHB1	YCR027C
YCR043C	non	YCR043C
YCR057C	PWP2	YCR057C
YDR036C	EHD3	YDR036C
YDR049W	non	YDR049W
YDR400W	URH1	YDR400W
YDR449C	UTP6	YDR449C
YDR482C	CWC21	YDR482C
YDR528W	HLR1	YDR528W
YEL048C	non	YEL048C
YER049W	TPA1	YER049W
YFL023W	BUD27	YFL023W
YFR048W	RMD8	YFR048W
YGL129C	RSM23	YGL129C
YGL157W	non	YGL157W
YGL246C	RAI1	YGL246C
YGR081C	SLX9	YGR081C
YGR103W	NOP7	YGR103W
YGR128C	UTP8	YGR128C
YHR049W	FSH1	YHR049W
YHR059W	FYV4	YHR059W
YHR073W	OSH3	YHR073W
YHR149C	SKG6	YHR149C
YHR196W	UTP9	YHR196W
YIL091C	non	YIL091C
YIL093C	RSM25	YIL093C
YIL104C	SHQ1	YIL104C
YIL145C	PAN6	YIL145C
YJL104W	PAM16	YJL104W
YJL212C	OPT1	YJL212C
YKR079C	TRZ1	YKR079C
YLL032C	non	YLL032C
YLL038C	ENT4	YLL038C
YLR002C	NOC3	YLR002C
YLR022C	SDO1	YLR022C
YLR084C	RAX2	YLR084C
YLR369W	SSQ1	YLR369W
YLR405W	DUS4	YLR405W
YLR413W	non	YLR413W
YLR435W	TSR2	YLR435W
YML005W	TRM12	YML005W
YML080W	DUS1	YML080W
YML096W	non	YML096W
YMR048W	CSM3	YMR048W
YMR192W	GYL1	YMR192W
YMR259C	non	YMR259C
YNL065W	AQR1	YNL065W
YNL155W	non	YNL155W
YNL166C	BNI5	YNL166C
YNL224C	SQS1	YNL224C
YNR014W	non	YNR014W
YOL031C	SIL1	YOL031C
YOL041C	NOP12	YOL041C
YOL080C	REX4	YOL080C
YOL144W	NOP8	YOL144W
YOR206W	NOC2	YOR206W
YPL014W	non	YPL014W
YPL146C	NOP53	YPL146C
YPR156C	TPO3	YPR156C
GO Enrichments
Process
GOID	GO_term	Cluster frequency	Background frequency	P-value	Gene(s) annotated to the term	Directly Annotated GOID List
16043	cellular component organization and biogenesis	70 out of 133 genes, 52.6%	2183 out of 7288 background genes, 30.0%	1.7e-05	YBL055C:AST1:EXO84:SMY2:RHB1:PWP2:MCD1:NRP1:EHD3:YDR161W:ADA2:UTP6:VPS52:HLR1:UTR2:TPA1:PEA2:BUD27:STE2:TIF4632:DUO1:HOS2:RAI1:CAX4:SLX9:NOP7:UTP8:RSR1:SMI1:MAS2:FYV4:GIC1:OSH3:STE12:UTP9:SDS3:PRK1:AXL2:TID3:NUP82:EXO70:PAM16:SET2:SWI3:PFD1:ECM25:HMS2:ENT4:NOC3:SDO1:RAX2:TSR2:NBP1:VPS9:SOK2:CSM3:GYL1:FET4:AAH1:BNI5:MDJ2:SIL1:REX4:MSH2:PAP2:NOP8:CTR9:NOC2:SPC29:NOP53	288:30466:7020:76:30468:30469:30100:45132:6402:17157:30031:6406:6407:6408:15809:7064:16571:6409:6265:6338:16573:147:15918:6623:16575:40:6627:30437:723:6487:16070:30472:16075:7103:31384:16076:31385:16077:16078:42273:6887:6888:6413:6309:6342:6270:30150:15819:42493:6999:6451:7076:15677:7329:1403:6457:54:910:55:30447:45835:735:6310:6311:6312:6893:30489:30846:6896:6897:7047:15680:7049:6354:6355:43629:…
6996	organelle organization and biogenesis	46 out of 133 genes, 34.6%	1293 out of 7288 background genes, 17.7%	0.00111	YBL055C:SMY2:PWP2:MCD1:NRP1:YDR161W:ADA2:UTP6:VPS52:TPA1:PEA2:DUO1:HOS2:RAI1:CAX4:SLX9:NOP7:UTP8:SMI1:FYV4:OSH3:UTP9:SDS3:PRK1:TID3:NUP82:SET2:SWI3:PFD1:ENT4:NOC3:SDO1:TSR2:NBP1:VPS9:CSM3:AAH1:BNI5:REX4:MSH2:PAP2:NOP8:CTR9:NOC2:SPC29:NOP53	288:30466:7020:76:30468:30469:30100:45132:6402:6406:6407:6408:7064:16571:6409:6265:6338:16573:147:15918:6623:16575:30437:723:6487:16070:30472:16075:7103:31384:16076:31385:16077:16078:42273:6887:6309:6342:6270:6999:6451:7076:1403:6457:54:910:55:30447:45835:735:6310:6311:6312:30489:30846:6896:6897:7047:7049:6354:6355:43629:6607:6608:6609:7266:27:6468:8283:742:921:7010:30490:42147:42254:42255:7015:7…
6396	RNA processing	20 out of 133 genes, 15.0%	368 out of 7288 background genes, 5.0%	0.00559	PRP45:EXO84:PWP2:UTP6:DEG1:RAI1:PRP38:SLX9:NOP7:UTP8:UTP9:TRZ1:NOC3:SDO1:TSR2:REX4:PAP2:NOP8:SEN54:NOP53	30468:398:7064:6265:42779:16070:16075:16076:16077:16078:42273:6887:6270:7076:6388:910:55:45944:30489:30846:7049:43629:27:8283:6396:30490:42254:42255:43630:43634:6364:245:6365
6364	rRNA processing	13 out of 133 genes, 9.8%	176 out of 7288 background genes, 2.4%	0.00987	PWP2:UTP6:RAI1:SLX9:NOP7:UTP8:UTP9:NOC3:SDO1:TSR2:REX4:NOP8:NOP53	30468:16070:42273:6270:910:55:30489:30846:7049:27:8283:30490:42254:42255:6364:6365
Component
GOID	GO_term	Cluster frequency	Background frequency	P-value	Gene(s) annotated to the term	Directly Annotated GOID List
44464	cell part	131 out of 133 genes, 98.5%	5495 out of 7288 background genes, 75.4%	6.39e-12	PRP45:YBL055C:AST1:YBR028C:TAT1:EXO84:SMY2:RHB1:YCR043C:CTR86:PWP2:MCD1:NRP1:MRPL11:EHD3:YDR049W:YDR161W:BTT1:SET7:URH1:ADA2:UTP6:CWC21:VPS52:LPP1:HLR1:UTR2:YEL048C:TPA1:PEA2:CCA1:DEG1:BUD27:STE2:RMD8:TIF4632:DUO1:ABC1:RSM23:YGL157W:SUA5:HOS2:SAP4:RAI1:CAX4:PRP38:SLX9:MRP13:NOP7:UTP8:RSR1:YGR207C:SER2:SMI1:LAG1:GPA1:MAS2:FSH1:FYV4:GIC1:OSH3:STE12:SPL2:SKG6:IKI1:UTP9:SDS3:YIL091C:RSM25:PRK1:SHQ1:A…	5854:5783:9277:16281:46695:938:30686:214:17087:30688:144:145:798:324:5643:5823:508:5681:5933:5829:5934:5935:5759:5938:5794:5798:30478:30479:30690:30691:118:31499:228:5830:16585:5654:1405:5834:5940:5762:5763:5768:5876:43332:16514:8023:124:778:5621:19897:19898:5730:5732:16593:5840:5737:5739:5774:5886:5887:780:16272:131:133:30136:5634:42729:5741:16020:5637:16021:5743:5816:5671:46540:5744:5819:30176:…
44424	intracellular part	120 out of 133 genes, 90.2%	5052 out of 7288 background genes, 69.3%	1.17e-06	PRP45:YBL055C:YBR028C:EXO84:SMY2:YCR043C:CTR86:PWP2:MCD1:NRP1:MRPL11:EHD3:YDR049W:YDR161W:BTT1:SET7:URH1:ADA2:UTP6:CWC21:VPS52:HLR1:UTR2:YEL048C:TPA1:PEA2:CCA1:DEG1:BUD27:RMD8:TIF4632:DUO1:ABC1:RSM23:YGL157W:SUA5:HOS2:SAP4:RAI1:CAX4:PRP38:SLX9:MRP13:NOP7:UTP8:YGR207C:SER2:SMI1:LAG1:GPA1:MAS2:FSH1:FYV4:GIC1:OSH3:STE12:SPL2:SKG6:IKI1:UTP9:SDS3:YIL091C:RSM25:PRK1:SHQ1:AXL2:TID3:PAN6:NUP82:EXO70:PAM1…	5854:5783:9277:16281:46695:938:30686:214:17087:30688:144:798:145:324:5643:5823:508:5681:5933:5829:5934:5935:5759:5938:5794:5798:30478:30479:30690:30691:118:31499:228:5830:16585:5654:1405:5834:5940:5762:5763:5768:5876:43332:16514:8023:124:778:5621:5730:5732:16593:5840:5737:5739:5774:5886:780:5887:16272:131:133:30136:42729:5634:5741:16020:5637:16021:5743:5816:5744:46540:5671:5819:31262:30176
5622	intracellular	120 out of 133 genes, 90.2%	5087 out of 7288 background genes, 69.8%	2.22e-06	PRP45:YBL055C:YBR028C:EXO84:SMY2:YCR043C:CTR86:PWP2:MCD1:NRP1:MRPL11:EHD3:YDR049W:YDR161W:BTT1:SET7:URH1:ADA2:UTP6:CWC21:VPS52:HLR1:UTR2:YEL048C:TPA1:PEA2:CCA1:DEG1:BUD27:RMD8:TIF4632:DUO1:ABC1:RSM23:YGL157W:SUA5:HOS2:SAP4:RAI1:CAX4:PRP38:SLX9:MRP13:NOP7:UTP8:YGR207C:SER2:SMI1:LAG1:GPA1:MAS2:FSH1:FYV4:GIC1:OSH3:STE12:SPL2:SKG6:IKI1:UTP9:SDS3:YIL091C:RSM25:PRK1:SHQ1:AXL2:TID3:PAN6:NUP82:EXO70:PAM1…	5854:5783:9277:16281:46695:938:30686:214:17087:30688:144:798:145:324:5643:5823:508:5681:5933:5829:5934:5935:5759:5938:5794:5798:30478:30479:30690:30691:118:31499:228:5830:16585:5654:1405:5834:5940:5762:5763:5768:5876:43332:16514:8023:124:778:5621:5730:5732:16593:5840:5737:5739:5774:5886:780:5887:16272:131:133:30136:42729:5634:5741:16020:5637:16021:5743:5816:5744:46540:5671:5819:31262:30176
5938	cell cortex	10 out of 133 genes, 7.5%	100 out of 7288 background genes, 1.4%	0.00238	EXO84:UTR2:PEA2:GIC1:SKG6:PRK1:AXL2:EXO70:ENT4:BNI5	9277:144:145:5934:5935:5938:30478:30479:5940:43332:5887:131:133:16021
30427	site of polarized growth	12 out of 133 genes, 9.0%	149 out of 7288 background genes, 2.0%	0.00297	EXO84:UTR2:PEA2:RSR1:SMI1:GIC1:SKG6:AXL2:RAX2:GYL1:BNI5:CSI2	9277:144:145:324:5933:5934:5935:5938:5798:30478:5940:43332:5621:5737:5739:5886:5887:131:133:5634:16020:16021
44448	cell cortex part	9 out of 133 genes, 6.8%	88 out of 7288 background genes, 1.2%	0.00549	EXO84:UTR2:PEA2:GIC1:PRK1:AXL2:EXO70:ENT4:BNI5	9277:144:145:5934:5935:30478:30479:5940:43332:5887:131:133
5935	bud neck	10 out of 133 genes, 7.5%	112 out of 7288 background genes, 1.5%	0.00646	EXO84:UTR2:RSR1:GIC1:SKG6:AXL2:RAX2:GYL1:BNI5:CSI2	9277:144:145:324:5933:5934:5935:5938:5798:30478:5940:43332:5621:5737:5739:5886:5887:131:16020:16021
5634	nucleus	58 out of 133 genes, 43.6%	1994 out of 7288 background genes, 27.4%	0.00672	PRP45:PWP2:MCD1:YDR161W:SET7:URH1:ADA2:UTP6:CWC21:TPA1:CCA1:DEG1:DUO1:YGL157W:HOS2:RAI1:PRP38:SLX9:NOP7:UTP8:SER2:SMI1:FSH1:STE12:IKI1:UTP9:SDS3:YIL091C:SHQ1:TID3:PAN6:NUP82:SET2:SWI3:HMS2:PMU1:TRZ1:NOC3:SDO1:TSR2:NBP1:DUS1:SOK2:CSM3:AAH1:YNL155W:SQS1:NOP12:REX4:MSH2:PAP2:NOP8:CTR9:NOC2:YPL014W:SEN54:NOP53:ARO7	46695:30686:214:30688:798:5643:5823:508:5681:5934:5759:30690:30691:118:31499:228:16585:5654:5876:16514:8023:124:778:5730:5732:16593:5737:5739:780:42729:5634:5741:5637:5816:46540:5671:5819:31262
Bi-Cluster 8	score = 294			Mean pattern, and conditions
YDR448W	ADA2	YDR448W
YBL069W	AST1	YBL069W
YLR433C	CNA1	YLR433C
YJR032W	CPR7	YJR032W
YOL007C	CSI2	YOL007C
YPR124W	CTR1	YPR124W
YCR054C	CTR86	YCR054C
YOL145C	CTR9	YOL145C
YGR036C	CAX4	YGR036C
YFL001W	DEG1	YFL001W
YJL201W	ECM25	YJL201W
YJL085W	EXO70	YJL085W
YJL168C	SET2	YJL168C
YMR319C	FET4	YMR319C
YHR061C	GIC1	YHR061C
YHR005C	GPA1	YHR005C
YOL056W	GPM3	YOL056W
YJR147W	HMS2	YJR147W
YGL194C	HOS2	YGL194C
YHR187W	IKI1	YHR187W
YPL263C	KEL3	YPL263C
YHL003C	LAG1	YHL003C
YDR503C	LPP1	YDR503C
YDL003W	MCD1	YDL003W
YNL328C	MDJ2	YNL328C
YKL089W	MIF2	YKL089W
YOL090W	MSH2	YOL090W
YLR457C	NBP1	YLR457C
YPL124W	SPC29	YPL124W
YDL167C	NRP1	YDL167C
YJL061W	NUP82	YJL061W
YER149C	PEA2	YER149C
YJL179W	PFD1	YJL179W
YIL095W	PRK1	YIL095W
YGR075C	PRP38	YGR075C
YDR257C	SET7	YDR257C
YMR061W	RNA14	YMR061W
YGR152C	RSR1	YGR152C
YDR484W	VPS52	YDR484W
YGL229C	SAP4	YGL229C
YIL084C	SDS3	YIL084C
YER118C	SHO1	YER118C
YHR136C	SPL2	YHR136C
YER022W	SRB4	YER022W
YIL140W	AXL2	YIL140W
YLR452C	SST2	YLR452C
YFL026W	STE2	YFL026W
YGL169W	SUA5	YGL169W
YJL176C	SWI3	YJL176C
YDR161W	non	YDR161W
YIL144W	TID3	YIL144W
YOL115W	PAP2	YOL115W
YBR069C	TAT1	YBR069C
YML097C	VPS9	YML097C
YBL055C	non	YBL055C
YBR028C	non	YBR028C
YBR216C	YBP1	YBR216C
YCR027C	RHB1	YCR027C
YCR043C	non	YCR043C
YCR057C	PWP2	YCR057C
YDR049W	non	YDR049W
YDR449C	UTP6	YDR449C
YDR524C	AGE1	YDR524C
YDR528W	HLR1	YDR528W
YEL048C	non	YEL048C
YFL023W	BUD27	YFL023W
YFR041C	ERJ5	YFR041C
YFR048W	RMD8	YFR048W
YGL129C	RSM23	YGL129C
YGL157W	non	YGL157W
YGL246C	RAI1	YGL246C
YGR081C	SLX9	YGR081C
YGR103W	NOP7	YGR103W
YHR073W	OSH3	YHR073W
YHR149C	SKG6	YHR149C
YIL104C	SHQ1	YIL104C
YIL145C	PAN6	YIL145C
YJL212C	OPT1	YJL212C
YKL061W	non	YKL061W
YKL088W	non	YKL088W
YKL116C	PRR1	YKL116C
YKR079C	TRZ1	YKR079C
YLL032C	non	YLL032C
YLL038C	ENT4	YLL038C
YLR022C	SDO1	YLR022C
YLR369W	SSQ1	YLR369W
YLR413W	non	YLR413W
YLR435W	TSR2	YLR435W
YML005W	TRM12	YML005W
YML096W	non	YML096W
YMR048W	CSM3	YMR048W
YMR192W	GYL1	YMR192W
YMR259C	non	YMR259C
YNL065W	AQR1	YNL065W
YNL155W	non	YNL155W
YNL166C	BNI5	YNL166C
YNL224C	SQS1	YNL224C
YNR014W	non	YNR014W
YOL041C	NOP12	YOL041C
YOL144W	NOP8	YOL144W
YOR206W	NOC2	YOR206W
YPR156C	TPO3	YPR156C
YPR171W	BSP1	YPR171W
GO Enrichments
Process
GOID	GO_term	Cluster frequency	Background frequency	P-value	Gene(s) annotated to the term	Directly Annotated GOID List
16043	cellular component organization and biogenesis	55 out of 103 genes, 53.4%	2183 out of 7288 background genes, 30.0%	0.00022	YBL055C:AST1:RHB1:PWP2:MCD1:NRP1:YDR161W:ADA2:UTP6:VPS52:AGE1:HLR1:SHO1:PEA2:BUD27:STE2:ERJ5:HOS2:RAI1:CAX4:SLX9:NOP7:RSR1:GIC1:OSH3:SDS3:PRK1:AXL2:TID3:NUP82:EXO70:SET2:SWI3:PFD1:ECM25:HMS2:MIF2:ENT4:SDO1:CNA1:TSR2:NBP1:VPS9:CSM3:GYL1:FET4:BNI5:MDJ2:MSH2:PAP2:NOP8:CTR9:NOC2:SPC29:BSP1	30466:7020:76:6873:30468:754:30469:30100:45132:17157:30031:6406:6407:6408:15809:7064:16571:6409:6265:6338:16573:147:15918:6623:16575:40:48228:30437:723:6487:16070:30472:16075:7103:31384:16076:31385:16077:16078:42273:6887:6888:6309:6342:30150:15819:42493:6999:7076:15677:1403:6457:54:910:30447:45835:735:6310:6891:6311:6312:6893:30489:30846:6896:6897:7047:15680:7049:6354:6355:43629:6607:7264:6608:66…
6996	organelle organization and biogenesis	38 out of 103 genes, 36.9%	1293 out of 7288 background genes, 17.7%	0.0012	YBL055C:PWP2:MCD1:NRP1:YDR161W:ADA2:UTP6:VPS52:PEA2:ERJ5:HOS2:RAI1:CAX4:SLX9:NOP7:OSH3:SDS3:PRK1:TID3:NUP82:SET2:SWI3:PFD1:MIF2:ENT4:SDO1:TSR2:NBP1:VPS9:CSM3:BNI5:MSH2:PAP2:NOP8:CTR9:NOC2:SPC29:BSP1	30466:7020:76:30468:30469:30100:45132:6406:6407:6408:7064:16571:6409:6265:6338:16573:147:15918:6623:16575:48228:30437:723:6487:16070:30472:16075:7103:31384:16076:31385:16077:16078:42273:6887:6309:6342:6999:7076:1403:6457:54:910:30447:45835:735:6310:6311:6312:30489:30846:6896:6897:7049:6354:6355:43629:6607:6608:6609:7266:27:6468:8283:742:921:7010:30490:42147:42254:42255:7015:7121:7124:43630:6325:6…
910	cytokinesis	9 out of 103 genes, 8.7%	106 out of 7288 background genes, 1.5%	0.00768	PWP2:PEA2:BUD27:RSR1:GIC1:PRK1:AXL2:EXO70:BNI5	30468:30100:147:31384:31385:910:30447:6893:7264:7266:6468:921:30490:42254:7120:7015:7121:7124:6365:7096:282:6904:6906
Component
GOID	GO_term	Cluster frequency	Background frequency	P-value	Gene(s) annotated to the term	Directly Annotated GOID List
44464	cell part	102 out of 103 genes, 99.0%	5495 out of 7288 background genes, 75.4%	1.12e-09	YBL055C:AST1:YBR028C:TAT1:YBP1:RHB1:YCR043C:CTR86:PWP2:MCD1:NRP1:YDR049W:YDR161W:SET7:ADA2:UTP6:VPS52:LPP1:AGE1:HLR1:YEL048C:SRB4:SHO1:PEA2:DEG1:BUD27:STE2:ERJ5:RMD8:RSM23:YGL157W:SUA5:HOS2:SAP4:RAI1:CAX4:PRP38:SLX9:NOP7:RSR1:LAG1:GPA1:GIC1:OSH3:SPL2:SKG6:IKI1:SDS3:PRK1:SHQ1:AXL2:TID3:PAN6:NUP82:EXO70:SET2:SWI3:PFD1:ECM25:OPT1:CPR7:HMS2:YKL061W:YKL088W:MIF2:PRR1:TRZ1:YLL032C:ENT4:SDO1:SSQ1:CNA1:T…	5783:46695:938:30686:30688:144:145:798:324:5643:5823:508:5933:5829:5934:5935:5759:5938:5794:5798:30478:30479:30690:30691:118:31499:119:228:16585:5654:1405:5834:5940:5763:5768:43332:16514:8023:124:778:19897:19898:5624:5730:5732:16592:16593:5840:5737:5739:5774:5849:5955:5886:5887:780:16272:131:133:30136:5634:16020:16021:5816:5743:46540:5671:30176:31262
44424	intracellular part	91 out of 103 genes, 88.3%	5052 out of 7288 background genes, 69.3%	0.00074	YBL055C:YBR028C:YBP1:YCR043C:CTR86:PWP2:MCD1:NRP1:YDR049W:YDR161W:SET7:ADA2:UTP6:VPS52:AGE1:HLR1:YEL048C:SRB4:PEA2:DEG1:BUD27:ERJ5:RMD8:RSM23:YGL157W:SUA5:HOS2:SAP4:RAI1:CAX4:PRP38:SLX9:NOP7:LAG1:GPA1:GIC1:OSH3:SPL2:SKG6:IKI1:SDS3:PRK1:SHQ1:AXL2:TID3:PAN6:NUP82:EXO70:SET2:SWI3:PFD1:ECM25:OPT1:CPR7:HMS2:YKL061W:YKL088W:MIF2:PRR1:TRZ1:YLL032C:ENT4:SDO1:SSQ1:CNA1:TSR2:NBP1:TRM12:YML096W:VPS9:CSM3:RN…	5783:46695:938:30686:30688:144:145:798:324:5643:5823:508:5933:5829:5934:5935:5759:5938:5794:5798:30478:30479:30690:30691:118:31499:119:228:16585:5654:1405:5834:5940:5763:5768:43332:16514:8023:124:778:5624:5730:5732:16592:16593:5840:5737:5739:5774:5849:5955:5886:780:5887:16272:131:133:30136:5634:16021:5743:5816:46540:5671:31262:30176
5622	intracellular	91 out of 103 genes, 88.3%	5087 out of 7288 background genes, 69.8%	0.00117	YBL055C:YBR028C:YBP1:YCR043C:CTR86:PWP2:MCD1:NRP1:YDR049W:YDR161W:SET7:ADA2:UTP6:VPS52:AGE1:HLR1:YEL048C:SRB4:PEA2:DEG1:BUD27:ERJ5:RMD8:RSM23:YGL157W:SUA5:HOS2:SAP4:RAI1:CAX4:PRP38:SLX9:NOP7:LAG1:GPA1:GIC1:OSH3:SPL2:SKG6:IKI1:SDS3:PRK1:SHQ1:AXL2:TID3:PAN6:NUP82:EXO70:SET2:SWI3:PFD1:ECM25:OPT1:CPR7:HMS2:YKL061W:YKL088W:MIF2:PRR1:TRZ1:YLL032C:ENT4:SDO1:SSQ1:CNA1:TSR2:NBP1:TRM12:YML096W:VPS9:CSM3:RN…	5783:46695:938:30686:30688:144:145:798:324:5643:5823:508:5933:5829:5934:5935:5759:5938:5794:5798:30478:30479:30690:30691:118:31499:119:228:16585:5654:1405:5834:5940:5763:5768:43332:16514:8023:124:778:5624:5730:5732:16592:16593:5840:5737:5739:5774:5849:5955:5886:780:5887:16272:131:133:30136:5634:16021:5743:5816:46540:5671:31262:30176
5938	cell cortex	9 out of 103 genes, 8.7%	100 out of 7288 background genes, 1.4%	0.00179	PEA2:GIC1:SKG6:PRK1:AXL2:EXO70:ENT4:BNI5:BSP1	144:145:5934:5935:5938:30478:30479:5940:43332:5624:5887:131:133:16021
5886	plasma membrane	14 out of 103 genes, 13.6%	256 out of 7288 background genes, 3.5%	0.00221	TAT1:RHB1:SHO1:STE2:RSR1:GPA1:AXL2:OPT1:SST2:GYL1:FET4:AQR1:CTR1:TPO3	5783:5933:5934:5935:5798:5834:5940:5768:43332:19897:5737:5739:5774:5886:5887:131
44448	cell cortex part	8 out of 103 genes, 7.8%	88 out of 7288 background genes, 1.2%	0.00529	PEA2:GIC1:PRK1:AXL2:EXO70:ENT4:BNI5:BSP1	144:145:5934:5935:30478:30479:5940:43332:5624:5887:131:133
30427	site of polarized growth	10 out of 103 genes, 9.7%	149 out of 7288 background genes, 2.0%	0.00756	SHO1:PEA2:RSR1:GIC1:SKG6:AXL2:GYL1:BNI5:CSI2:BSP1	144:324:5933:5934:5935:5938:5798:30478:30479:5940:43332:5624:5737:5739:5886:5887:131:133:16021
30686	90S preribosome	3 out of 103 genes, 2.9%	6 out of 7288 background genes, 0.1%	0.00919	PWP2:SLX9:NOC2	30686:30688:30690:30691:5730:5732:5737:5739:5634
Bi-Cluster 9	score = 351			Mean pattern, and conditions
YDR448W	ADA2	YDR448W
YPR180W	AOS1	YPR180W
YBR211C	AME1	YBR211C
YBL069W	AST1	YBL069W
YDR252W	BTT1	YDR252W
YJR060W	CBF1	YJR060W
YGL190C	CDC55	YGL190C
YLR433C	CNA1	YLR433C
YJR032W	CPR7	YJR032W
YOL007C	CSI2	YOL007C
YPR124W	CTR1	YPR124W
YCR054C	CTR86	YCR054C
YOL145C	CTR9	YOL145C
YGR036C	CAX4	YGR036C
YMR032W	HOF1	YMR032W
YJL201W	ECM25	YJL201W
YNL327W	EGT2	YNL327W
YJL085W	EXO70	YJL085W
YJL168C	SET2	YJL168C
YCR028C	FEN2	YCR028C
YMR319C	FET4	YMR319C
YHR061C	GIC1	YHR061C
YHR005C	GPA1	YHR005C
YOL059W	GPD2	YOL059W
YPL076W	GPI2	YPL076W
YJR147W	HMS2	YJR147W
YGL194C	HOS2	YGL194C
YHR187W	IKI1	YHR187W
YHL003C	LAG1	YHL003C
YNL328C	MDJ2	YNL328C
YBR193C	MED8	YBR193C
YLR457C	NBP1	YLR457C
YDL002C	NHP10	YDL002C
YDL167C	NRP1	YDL167C
YJL061W	NUP82	YJL061W
YJL179W	PFD1	YJL179W
YIL095W	PRK1	YIL095W
YGR075C	PRP38	YGR075C
YBR237W	PRP5	YBR237W
YDR257C	SET7	YDR257C
YMR061W	RNA14	YMR061W
YCR035C	RRP43	YCR035C
YKR008W	RSC4	YKR008W
YDR484W	VPS52	YDR484W
YGL229C	SAP4	YGL229C
YIL084C	SDS3	YIL084C
YNL272C	SEC2	YNL272C
YER068W	MOT2	YER068W
YNR034W	SOL1	YNR034W
YHR136C	SPL2	YHR136C
YER022W	SRB4	YER022W
YIL140W	AXL2	YIL140W
YLR452C	SST2	YLR452C
YDR169C	STB3	YDR169C
YHR084W	STE12	YHR084W
YFL026W	STE2	YFL026W
YGL169W	SUA5	YGL169W
YNL066W	SUN4	YNL066W
YJL176C	SWI3	YJL176C
YDR161W	non	YDR161W
YIL144W	TID3	YIL144W
YOL115W	PAP2	YOL115W
YDR207C	UME6	YDR207C
YBR069C	TAT1	YBR069C
YML097C	VPS9	YML097C
YAL032C	PRP45	YAL032C
YBL055C	non	YBL055C
YBR028C	non	YBR028C
YBR102C	EXO84	YBR102C
YBR216C	YBP1	YBR216C
YBR227C	MCX1	YBR227C
YCL045C	non	YCL045C
YCR027C	RHB1	YCR027C
YCR057C	PWP2	YCR057C
YDR036C	EHD3	YDR036C
YDR049W	non	YDR049W
YDR111C	ALT2	YDR111C
YDR219C	MFB1	YDR219C
YDR482C	CWC21	YDR482C
YDR524C	AGE1	YDR524C
YDR527W	RBA50	YDR527W
YDR528W	HLR1	YDR528W
YEL048C	non	YEL048C
YER080W	FMP29	YER080W
YFL023W	BUD27	YFL023W
YGL157W	non	YGL157W
YGL246C	RAI1	YGL246C
YGR002C	SWC4	YGR002C
YGR081C	SLX9	YGR081C
YGR103W	NOP7	YGR103W
YGR251W	non	YGR251W
YHR073W	OSH3	YHR073W
YHR085W	IPI1	YHR085W
YIL104C	SHQ1	YIL104C
YIL117C	PRM5	YIL117C
YIL145C	PAN6	YIL145C
YJL029C	VPS53	YJL029C
YJL186W	MNN5	YJL186W
YJL212C	OPT1	YJL212C
YJR003C	non	YJR003C
YJR083C	ACF4	YJR083C
YKL061W	non	YKL061W
YKL088W	non	YKL088W
YKL116C	PRR1	YKL116C
YKR023W	non	YKR023W
YKR045C	non	YKR045C
YKR060W	UTP30	YKR060W
YKR079C	TRZ1	YKR079C
YLL032C	non	YLL032C
YLL038C	ENT4	YLL038C
YLR022C	SDO1	YLR022C
YLR369W	SSQ1	YLR369W
YLR405W	DUS4	YLR405W
YLR413W	non	YLR413W
YLR435W	TSR2	YLR435W
YML005W	TRM12	YML005W
YML082W	non	YML082W
YML096W	non	YML096W
YMR178W	non	YMR178W
YMR192W	GYL1	YMR192W
YMR259C	non	YMR259C
YNL058C	non	YNL058C
YNL065W	AQR1	YNL065W
YNL078W	NIS1	YNL078W
YNL155W	non	YNL155W
YNL158W	PGA1	YNL158W
YNL191W	DUG3	YNL191W
YNL215W	IES2	YNL215W
YNL224C	SQS1	YNL224C
YNL245C	CWC25	YNL245C
YNL275W	BOR1	YNL275W
YNR014W	non	YNR014W
YOL041C	NOP12	YOL041C
YOL144W	NOP8	YOL144W
YOR206W	NOC2	YOR206W
YPL014W	non	YPL014W
YPL146C	NOP53	YPL146C
YPR091C	non	YPR091C
YPR156C	TPO3	YPR156C
YPR171W	BSP1	YPR171W
YIR026C	YVH1	YIR026C
GO Enrichments
Process
GOID	GO_term	Cluster frequency	Background frequency	P-value	Gene(s) annotated to the term	Directly Annotated GOID List
16043	cellular component organization and biogenesis	72 out of 141 genes, 51.1%	2183 out of 7288 background genes, 30.0%	5.01e-05	YBL055C:AST1:EXO84:AME1:PRP5:RHB1:FEN2:RRP43:PWP2:NHP10:NRP1:EHD3:YDR161W:UME6:MFB1:ADA2:VPS52:AGE1:HLR1:MOT2:BUD27:STE2:CDC55:HOS2:RAI1:SWC4:CAX4:SLX9:NOP7:YGR251W:GIC1:OSH3:STE12:IPI1:SDS3:PRK1:AXL2:TID3:YVH1:VPS53:NUP82:EXO70:SET2:SWI3:PFD1:ECM25:YJR003C:CBF1:ACF4:HMS2:RSC4:UTP30:ENT4:SDO1:CNA1:TSR2:NBP1:VPS9:GYL1:FET4:SUN4:PGA1:SEC2:BOR1:MDJ2:SOL1:PAP2:NOP8:CTR9:NOC2:NOP53:BSP1	289:30468:30469:30100:7131:6402:30031:6333:6406:6407:7064:30036:6408:15809:6409:6265:6338:147:7068:6623:40:48228:723:15887:6487:5977:42273:6412:6342:15819:6999:42493:7076:15677:1403:370:54:55:7001:45835:45836:7005:30489:45045:30846:15680:6354:6281:6355:6357:46713:8608:742:7010:30490:42147:747:7015:749:8033:245:16567:6364:16568:6365:7094:6366:8610:7096:6368:7020:6873:754:17157:6511:16571:16573:159…
6396	RNA processing	22 out of 141 genes, 15.6%	368 out of 7288 background genes, 5.0%	0.00097	PRP45:EXO84:PRP5:RRP43:PWP2:MOT2:RAI1:PRP38:SLX9:NOP7:YGR251W:IPI1:UTP30:TRZ1:SDO1:TSR2:RNA14:CWC25:SOL1:PAP2:NOP8:NOP53	289:30468:6402:7064:6409:6265:42779:723:42273:7076:370:55:30489:30846:6357:30490:747:8033:6364:16567:245:6365:6368:398:6378:6379:16070:16075:16076:16077:16078:6887:910:45944:7049:43629:27:8283:42254:43630:43634
6996	organelle organization and biogenesis	47 out of 141 genes, 33.3%	1293 out of 7288 background genes, 17.7%	0.00254	YBL055C:AME1:RRP43:PWP2:NHP10:NRP1:YDR161W:UME6:MFB1:ADA2:VPS52:MOT2:CDC55:HOS2:RAI1:SWC4:CAX4:SLX9:NOP7:YGR251W:OSH3:IPI1:SDS3:PRK1:TID3:YVH1:NUP82:SET2:SWI3:PFD1:YJR003C:CBF1:ACF4:RSC4:UTP30:ENT4:SDO1:TSR2:NBP1:VPS9:SUN4:PAP2:NOP8:CTR9:NOC2:NOP53:BSP1	289:30468:30469:30100:7131:6402:6333:6406:6407:7064:30036:6408:6409:6265:6338:147:7068:6623:48228:723:6487:5977:42273:6412:6342:6999:42493:7076:1403:54:55:45835:7001:45836:7005:30489:30846:6354:6281:6355:6357:8608:742:7010:30490:42147:7015:747:6364:16567:7094:16568:6365:6366:8610:6368:7020:6511:16571:16573:15918:16575:30437:16070:16075:7103:16076:16077:16078:6887:6309:6457:910:43044:7117:6896:689…
51301	cell division	20 out of 141 genes, 14.2%	333 out of 7288 background genes, 4.6%	0.00282	PWP2:UME6:MOT2:BUD27:STE2:CDC55:GPA1:GIC1:OSH3:STE12:PRK1:PRM5:AXL2:YVH1:EXO70:SET2:CNA1:SST2:HOF1:EGT2	289:30468:30469:30100:7131:30031:147:7068:723:5977:6412:19236:48017:42493:1403:7001:45836:6354:6355:6357:742:30490:7015:747:749:7165:16567:7094:6365:7096:6368:750:6873:754:16571:15918:16575:30437:6887:7329:910:6893:7117:6897:7047:31684:7266:6468:42254:7120:7121:6974:7124:7126:6470:282:6904:6906
Component
GOID	GO_term	Cluster frequency	Background frequency	P-value	Gene(s) annotated to the term	Directly Annotated GOID List
44464	cell part	138 out of 141 genes, 97.9%	5495 out of 7288 background genes, 75.4%	1.1e-11	PRP45:YBL055C:AST1:YBR028C:TAT1:EXO84:MED8:AME1:YBP1:MCX1:PRP5:YCL045C:RHB1:FEN2:RRP43:CTR86:PWP2:NHP10:NRP1:EHD3:YDR049W:ALT2:YDR161W:STB3:UME6:MFB1:BTT1:SET7:ADA2:CWC21:VPS52:AGE1:RBA50:HLR1:YEL048C:SRB4:MOT2:FMP29:BUD27:STE2:YGL157W:SUA5:CDC55:HOS2:SAP4:RAI1:SWC4:CAX4:PRP38:SLX9:NOP7:YGR251W:LAG1:GPA1:GIC1:OSH3:STE12:IPI1:SPL2:IKI1:SDS3:PRK1:SHQ1:PRM5:AXL2:TID3:PAN6:YVH1:VPS53:NUP82:EXO70:SET2…	5854:5783:9277:46695:31011:938:30686:142:30688:35267:145:324:5643:506:5823:508:5681:5933:5829:5934:5935:5759:5794:5798:30478:30479:30690:30691:118:31499:119:151:5830:16585:16586:5654:159:31315:1405:5834:5940:5768:43332:16514:30015:8023:776:123:124:778:19897:19898:5624:5730:5732:16592:16593:5840:5737:5739:5773:812:5774:5849:5955:817:5886:5887:780:16272:131:30136:5634:5635:16021:5743:5816:16023:567…
44424	intracellular part	127 out of 141 genes, 90.1%	5052 out of 7288 background genes, 69.3%	5.38e-07	PRP45:YBL055C:YBR028C:EXO84:MED8:AME1:YBP1:MCX1:PRP5:YCL045C:RRP43:CTR86:PWP2:NHP10:NRP1:EHD3:YDR049W:ALT2:YDR161W:STB3:UME6:MFB1:BTT1:SET7:ADA2:CWC21:VPS52:AGE1:RBA50:HLR1:YEL048C:SRB4:MOT2:FMP29:BUD27:YGL157W:SUA5:CDC55:HOS2:SAP4:RAI1:SWC4:CAX4:PRP38:SLX9:NOP7:YGR251W:LAG1:GPA1:GIC1:OSH3:STE12:IPI1:SPL2:IKI1:SDS3:PRK1:SHQ1:AXL2:TID3:PAN6:YVH1:VPS53:NUP82:EXO70:SET2:SWI3:PFD1:MNN5:ECM25:OPT1:YJR…	5854:5783:9277:46695:31011:938:30686:142:30688:35267:145:324:5643:506:5823:508:5681:5933:5829:5934:5935:5759:5794:5798:30478:30479:30690:30691:118:31499:151:119:5830:16585:16586:5654:159:31315:1405:5834:5940:5768:43332:16514:8023:30015:123:776:124:778:5624:5730:5732:16592:16593:5840:5737:5739:5773:812:5774:5849:5955:817:5886:780:5887:16272:131:30136:5634:5635:5743:5816:16023:46540:5671:176:177:31…
5622	intracellular	127 out of 141 genes, 90.1%	5087 out of 7288 background genes, 69.8%	1.05e-06	PRP45:YBL055C:YBR028C:EXO84:MED8:AME1:YBP1:MCX1:PRP5:YCL045C:RRP43:CTR86:PWP2:NHP10:NRP1:EHD3:YDR049W:ALT2:YDR161W:STB3:UME6:MFB1:BTT1:SET7:ADA2:CWC21:VPS52:AGE1:RBA50:HLR1:YEL048C:SRB4:MOT2:FMP29:BUD27:YGL157W:SUA5:CDC55:HOS2:SAP4:RAI1:SWC4:CAX4:PRP38:SLX9:NOP7:YGR251W:LAG1:GPA1:GIC1:OSH3:STE12:IPI1:SPL2:IKI1:SDS3:PRK1:SHQ1:AXL2:TID3:PAN6:YVH1:VPS53:NUP82:EXO70:SET2:SWI3:PFD1:MNN5:ECM25:OPT1:YJR…	5854:5783:9277:46695:31011:938:30686:142:30688:35267:145:324:5643:506:5823:508:5681:5933:5829:5934:5935:5759:5794:5798:30478:30479:30690:30691:118:31499:151:119:5830:16585:16586:5654:159:31315:1405:5834:5940:5768:43332:16514:8023:30015:123:776:124:778:5624:5730:5732:16592:16593:5840:5737:5739:5773:812:5774:5849:5955:817:5886:780:5887:16272:131:30136:5634:5635:5743:5816:16023:46540:5671:176:177:31…
Bi-Cluster 10	score = 537
				Mean pattern, and conditions
YGR037C	ACB1	YGR037C
YPL061W	ALD6	YPL061W
YOR374W	ALD4	YOR374W
YOL058W	ARG1	YOL058W
YHR018C	ARG4	YHR018C
YLR295C	ATP14	YLR295C
YPL271W	ATP15	YPL271W
YJR121W	ATP2	YJR121W
YBR039W	ATP3	YBR039W
YJR148W	BAT2	YJR148W
YER177W	BMH1	YER177W
YDR099W	BMH2	YDR099W
YNL052W	COX5A	YNL052W
YMR256C	COX7	YMR256C
YLR395C	COX8	YLR395C
YDR294C	DPL1	YDR294C
YMR276W	DSK2	YMR276W
YLR348C	DIC1	YLR348C
YNL327W	EGT2	YNL327W
YPL028W	ERG10	YPL028W
YHR007C	ERG11	YHR007C
YGR060W	ERG25	YGR060W
YML012W	ERV25	YML012W
YPL231W	FAS2	YPL231W
YKL060C	FBA1	YKL060C
YPL262W	FUM1	YPL262W
YOR375C	GDH1	YOR375C
YPR160W	GPH1	YPR160W
YML075C	HMG1	YML075C
YML126C	ERG13	YML126C
YJR139C	HOM6	YJR139C
YMR186W	HSC82	YMR186W
YFL014W	HSP12	YFL014W
YBR072W	HSP26	YBR072W
YIR037W	HYR1	YIR037W
YCL009C	ILV6	YCL009C
YDR497C	ITR1	YDR497C
YIL125W	KGD1	YIL125W
YKL103C	LAP4	YKL103C
YNL071W	LAT1	YNL071W
YNL104C	LEU4	YNL104C
YGR244C	LSC2	YGR244C
YKL085W	MDH1	YKL085W
YOL126C	MDH2	YOL126C
YDL078C	MDH3	YDL078C
YJR077C	MIR1	YJR077C
YKL142W	MRP8	YKL142W
YPR149W	NCE102	YPR149W
YGL055W	OLE1	YGL055W
YJR073C	OPI3	YJR073C
YNL015W	PBI2	YNL015W
YER178W	PDA1	YER178W
YOL147C	PEX11	YOL147C
YMR205C	PFK2	YMR205C
YBR196C	PGI1	YBR196C
YCR012W	PGK1	YCR012W
YNL055C	POR1	YNL055C
YEL060C	PRB1	YEL060C
YFR050C	PRE4	YFR050C
YMR314W	PRE5	YMR314W
YOL038W	PRE6	YOL038W
YML092C	PRE8	YML092C
YAL038W	CDC19	YAL038W
YDR529C	QCR7	YDR529C
YEL024W	RIP1	YEL024W
YGR180C	RNR4	YGR180C
YPR102C	RPL11A	YPR102C
YEL054C	RPL12A	YEL054C
YPL220W	RPL1A	YPL220W
YMR242C	RPL20A	YMR242C
YPL131W	RPL5	YPL131W
YHL033C	RPL8A	YHL033C
YOL039W	RPP2A	YOL039W
YGL048C	RPT6	YGL048C
YKL117W	SBA1	YKL117W
YHL034C	SBP1	YHL034C
YDR178W	SDH4	YDR178W
YLR378C	SEC61	YLR378C
YDR077W	SED1	YDR077W
YNL007C	SIS1	YNL007C
YIL033C	BCY1	YIL033C
YAL005C	SSA1	YAL005C
YOR027W	STI1	YOR027W
YNL066W	SUN4	YNL066W
YPR080W	TEF1	YPR080W
YJL138C	TIF2	YJL138C
YBR126C	TPS1	YBR126C
YGR209C	TRX2	YGR209C
YJL130C	URA2	YJL130C
YBR127C	VMA2	YBR127C
YOR270C	VPH1	YOR270C
YBL064C	PRX1	YBL064C
YBR016W	non	YBR016W
YBR101C	FES1	YBR101C
YBR149W	ARA1	YBR149W
YBR241C	non	YBR241C
YCL035C	GRX1	YCL035C
YCR004C	YCP4	YCR004C
YDL046W	NPC2	YDL046W
YDL072C	YET3	YDL072C
YDL110C	TMA17	YDL110C
YDR032C	PST2	YDR032C
YDR233C	RTN1	YDR233C
YDR384C	ATO3	YDR384C
YLR249W	YEF3	YLR249W
YER004W	FMP52	YER004W
YER067W	non	YER067W
YKL065C	YET1	YKL065C
YGL037C	PNC1	YGL037C
YGR243W	FMP43	YGR243W
YIL124W	AYR1	YIL124W
YJR044C	VPS55	YJR044C
YKR067W	GPT2	YKR067W
YMR002W	MIC17	YMR002W
YMR145C	NDE1	YMR145C
YKL067W	YNK1	YKL067W
YOR285W	non	YOR285W
GO Enrichments
Process
GOID	GO_term	Cluster frequency	Background frequency	P-value	Gene(s) annotated to the term	Directly Annotated GOID List
6091	generation of precursor metabolites and energy	27 out of 117 genes, 23.1%	336 out of 7288 background genes, 4.6%	7.93e-10	CDC19:ATP3:TPS1:PGI1:PGK1:MDH3:BMH2:SDH4:QCR7:RIP1:BMH1:LSC2:KGD1:ATP2:FBA1:MDH1:ATP14:COX8:NDE1:PFK2:COX7:COX5A:POR1:MDH2:FUM1:ATP15:GPH1	19655:15986:5980:7005:17062:77:6116:1300:9060:1321:7265:6735:30437:6950:6103:6104:6121:6106:6122:5975:6123:5992:6108:5977:51436:7124:6090:6094:42493:6096:6097:1402:6098:6811:6099:6635
19752	carboxylic acid metabolic process	25 out of 117 genes, 21.4%	308 out of 7288 background genes, 4.2%	4.92e-09	CDC19:PGI1:ILV6:PGK1:MDH3:PDA1:OLE1:ACB1:ARG4:AYR1:KGD1:URA2:HOM6:BAT2:FBA1:MDH1:LAT1:LEU4:ARG1:MDH2:PEX11:GDH1:ALD6:FAS2:FUM1	53:9098:19856:6207:18065:16559:6537:6555:9082:9083:6735:19395:6103:6106:7031:6108:6090:19413:1:6094:42493:15909:6541:6096:6526:6631:6097:6098:6633:6099:6635:9090:6636:6654:52:6566
6082	organic acid metabolic process	25 out of 117 genes, 21.4%	308 out of 7288 background genes, 4.2%	4.92e-09	CDC19:PGI1:ILV6:PGK1:MDH3:PDA1:OLE1:ACB1:ARG4:AYR1:KGD1:URA2:HOM6:BAT2:FBA1:MDH1:LAT1:LEU4:ARG1:MDH2:PEX11:GDH1:ALD6:FAS2:FUM1	53:9098:19856:6207:18065:16559:6537:6555:9082:9083:6735:19395:6103:6106:7031:6108:6090:19413:1:6094:42493:15909:6541:6096:6526:6631:6097:6098:6633:6099:6635:9090:6636:6654:52:6566
8152	metabolic process	91 out of 117 genes, 77.8%	3509 out of 7288 background genes, 48.1%	1.67e-08	SSA1:CDC19:PRX1:ATP3:HSP26:FES1:TPS1:ARA1:PGI1:ILV6:GRX1:PGK1:MDH3:BMH2:SDH4:DPL1:ATO3:QCR7:RIP1:RPL12A:PRB1:BMH1:PDA1:HSP12:PRE4:PNC1:RPT6:OLE1:ACB1:ERG25:RNR4:TRX2:LSC2:RPL8A:SBP1:ERG11:ARG4:AYR1:KGD1:HYR1:URA2:TIF2:OPI3:ATP2:HOM6:BAT2:FBA1:YNK1:MDH1:LAP4:SBA1:MRP8:GPT2:YEF3:ATP14:COX8:HMG1:PRE8:ERG13:NDE1:HSC82:PFK2:RPL20A:COX7:DSK2:PRE5:SIS1:PBI2:COX5A:POR1:LAT1:LEU4:PRE6:RPP2A:ARG1:MDH2:PEX1…	6656:19655:15986:9098:8654:6696:77:6116:103:18065:43248:6260:6511:6261:6409:9060:1321:6446:30503:183:6626:30433:6555:30435:6735:723:30437:6665:16070:6950:6121:84:6122:7103:6123:5975:7031:5977:7035:6888:6412:6413:6414:6090:6164:7039:19413:6165:1:6094:42493:11:6096:9142:6526:6631:6348:6097:1402:6098:6633:6811:6099:6635:6457:6458:6636:42026:19740:52:6566:53:5980:7005:17062:6890:19856:6207:6067:1300:…
44237	cellular metabolic process	89 out of 117 genes, 76.1%	3429 out of 7288 background genes, 47.0%	4.99e-08	SSA1:CDC19:PRX1:ATP3:HSP26:FES1:TPS1:PGI1:ILV6:GRX1:PGK1:MDH3:BMH2:SDH4:DPL1:QCR7:RIP1:RPL12A:PRB1:BMH1:PDA1:HSP12:PRE4:PNC1:RPT6:OLE1:ACB1:ERG25:RNR4:TRX2:LSC2:RPL8A:SBP1:ERG11:ARG4:AYR1:KGD1:HYR1:URA2:TIF2:OPI3:ATP2:HOM6:BAT2:FBA1:YNK1:MDH1:LAP4:SBA1:MRP8:GPT2:YEF3:ATP14:COX8:HMG1:PRE8:ERG13:NDE1:HSC82:PFK2:RPL20A:COX7:DSK2:PRE5:SIS1:PBI2:COX5A:POR1:LAT1:LEU4:PRE6:RPP2A:ARG1:MDH2:PEX11:STI1:VPH…	6656:19655:15986:9098:8654:6696:77:6116:103:18065:43248:6260:6511:6261:6409:9060:1321:6446:30503:183:6626:30433:6555:30435:6735:723:30437:6665:16070:6950:6121:84:6122:7103:6123:5975:7031:5977:7035:6888:6412:6413:6414:6090:6164:7039:19413:6165:1:6094:42493:11:6096:9142:6526:6631:6348:6097:1402:6098:6633:6811:6099:6635:6457:6458:6636:42026:52:6566:53:5980:7005:17062:6890:19856:6207:6067:1300:7155:1…
6119	oxidative phosphorylation	10 out of 117 genes, 8.5%	46 out of 7288 background genes, 0.6%	9.2e-07	ATP3:SDH4:QCR7:RIP1:ATP2:ATP14:COX8:COX7:COX5A:ATP15	15986:9060:1321:6121:6122:6123:6099:17062
15980	energy derivation by oxidation of organic compounds	20 out of 117 genes, 17.1%	298 out of 7288 background genes, 4.1%	2e-05	CDC19:TPS1:PGI1:PGK1:MDH3:BMH2:SDH4:QCR7:RIP1:BMH1:LSC2:KGD1:FBA1:MDH1:NDE1:PFK2:POR1:MDH2:FUM1:GPH1	19655:77:6116:9060:6735:30437:6950:6121:6122:5975:5977:6090:6094:42493:6096:6097:1402:6098:6811:6099:6635:5980:7005:17062:1300:7265:6103:6104:6106:6108:5992:7124:51436
43648	dicarboxylic acid metabolic process	5 out of 117 genes, 4.3%	8 out of 7288 background genes, 0.1%	2.51e-05	MDH3:KGD1:MDH1:MDH2:FUM1	6735:6094:6097:6099:6635:6103:6106:6108
32787	monocarboxylic acid metabolic process	13 out of 117 genes, 11.1%	121 out of 7288 background genes, 1.7%	2.61e-05	CDC19:PGI1:PGK1:MDH3:PDA1:OLE1:ACB1:FBA1:LAT1:MDH2:PEX11:ALD6:FAS2	18065:6735:7031:6090:19413:1:6094:6096:6631:6097:6098:6633:6635:6636:16559:19395:6108:15909
5975	carbohydrate metabolic process	17 out of 117 genes, 14.5%	229 out of 7288 background genes, 3.1%	5.46e-05	CDC19:TPS1:ARA1:PGI1:PGK1:MDH3:BMH2:SDH4:BMH1:LSC2:KGD1:FBA1:MDH1:PFK2:MDH2:FUM1:GPH1	77:6735:30437:6950:6121:5975:5977:6090:6094:42493:6096:6097:1402:6098:6099:6635:5980:7265:6103:6104:6106:6108:5992:7124:51436
44262	cellular carbohydrate metabolic process	16 out of 117 genes, 13.7%	209 out of 7288 background genes, 2.9%	8.75e-05	CDC19:TPS1:PGI1:PGK1:MDH3:BMH2:SDH4:BMH1:LSC2:KGD1:FBA1:MDH1:PFK2:MDH2:FUM1:GPH1	77:6735:30437:6950:6121:5975:5977:6090:6094:42493:6096:6097:1402:6098:6099:6635:5980:7265:6103:6104:6106:6108:5992:7124:51436
6732	coenzyme metabolic process	13 out of 117 genes, 11.1%	135 out of 7288 background genes, 1.9%	9.66e-05	ATP3:PGI1:MDH3:SDH4:PNC1:LSC2:KGD1:ATP2:MDH1:ATP14:NDE1:FUM1:ATP15	19655:15986:6116:1321:183:6735:6121:6094:6096:6348:6097:6098:6099:6635:1300:1302:19358:6103:6104:6106:6108
6100	tricarboxylic acid cycle intermediate metabolic process	6 out of 117 genes, 5.1%	19 out of 7288 background genes, 0.3%	0.00016	MDH3:LSC2:KGD1:MDH1:MDH2:FUM1	6735:6094:6097:6099:6635:6103:6104:6106:6108
9058	biosynthetic process	42 out of 117 genes, 35.9%	1220 out of 7288 background genes, 16.7%	0.00017	SSA1:ATP3:FES1:TPS1:PGI1:ILV6:PGK1:RPL12A:ERG25:RPL8A:ERG11:ARG4:AYR1:URA2:TIF2:OPI3:ATP2:HOM6:BAT2:FBA1:YNK1:MRP8:GPT2:YEF3:ATP14:HMG1:ERG13:RPL20A:SIS1:LEU4:RPP2A:ARG1:MDH2:GDH1:ERG10:ALD6:RPL5:RPL1A:FAS2:ATP15:TEF1:RPL11A	6656:15986:9098:8654:6696:18065:6409:1321:6446:6626:6555:16070:6950:5975:6412:6413:6414:6164:19413:6165:6094:42493:6096:9142:6526:6098:6633:6457:42026:52:6566:53:19856:6207:9117:6537:9082:9083:27:60:42254:6108:5992:6541:6259:6616:9090:6654
6090	pyruvate metabolic process	7 out of 117 genes, 6.0%	36 out of 7288 background genes, 0.5%	0.00062	CDC19:PGI1:PGK1:PDA1:FBA1:LAT1:MDH2	6090:6094:6096:6098:6108
44238	primary metabolic process	77 out of 117 genes, 65.8%	3207 out of 7288 background genes, 44.0%	0.00065	SSA1:CDC19:ATP3:HSP26:FES1:TPS1:ARA1:PGI1:ILV6:PGK1:MDH3:BMH2:SDH4:DPL1:QCR7:RPL12A:PRB1:BMH1:PRE4:PNC1:RPT6:OLE1:ACB1:ERG25:RNR4:TRX2:LSC2:RPL8A:SBP1:ERG11:ARG4:AYR1:KGD1:URA2:TIF2:OPI3:ATP2:HOM6:BAT2:FBA1:YNK1:MDH1:LAP4:SBA1:MRP8:GPT2:YEF3:ATP14:HMG1:PRE8:ERG13:NDE1:HSC82:PFK2:RPL20A:DSK2:PRE5:SIS1:PBI2:LEU4:PRE6:RPP2A:ARG1:MDH2:PEX11:STI1:VPH1:GDH1:ERG10:RPL5:RPL1A:FAS2:FUM1:ATP15:TEF1:RPL11A:…	6656:19655:15986:9098:8654:6696:77:6116:103:18065:43248:6260:6511:6261:6409:9060:1321:6446:30503:183:6626:30433:6555:30435:6735:723:30437:6665:16070:6950:6121:84:6122:7103:5975:7031:5977:7035:6888:6412:6413:6414:6090:6164:7039:6165:1:6094:42493:11:6096:9142:6526:6631:6348:6097:1402:6098:6633:6099:6635:6457:6458:6636:42026:52:6566:53:5980:17062:6890:19856:6207:1300:1302:9117:6461:16559:30162:7265:…
6066	alcohol metabolic process	13 out of 117 genes, 11.1%	163 out of 7288 background genes, 2.2%	0.00085	CDC19:PGI1:PGK1:ERG25:ERG11:FBA1:HMG1:ERG13:NDE1:PFK2:MDH2:ALD4:ERG10	19655:6696:6116:6090:6094:6096:6098:6067:1300:6108
42773	ATP synthesis coupled electron transport	6 out of 117 genes, 5.1%	25 out of 7288 background genes, 0.3%	0.00098	SDH4:QCR7:RIP1:COX8:COX7:COX5A	9060:6121:6122:6123:6099:17062
42775	organelle ATP synthesis coupled electron transport	6 out of 117 genes, 5.1%	25 out of 7288 background genes, 0.3%	0.00098	SDH4:QCR7:RIP1:COX8:COX7:COX5A	9060:6121:6122:6123:6099:17062
51186	cofactor metabolic process	13 out of 117 genes, 11.1%	168 out of 7288 background genes, 2.3%	0.00119	ATP3:PGI1:MDH3:SDH4:PNC1:LSC2:KGD1:ATP2:MDH1:ATP14:NDE1:FUM1:ATP15	19655:15986:6116:1321:183:6735:6121:6094:6096:6348:6097:6098:6099:6635:1300:1302:19358:6103:6104:6106:6108
46356	acetyl-CoA catabolic process	5 out of 117 genes, 4.3%	15 out of 7288 background genes, 0.2%	0.00123	SDH4:LSC2:KGD1:MDH1:FUM1	6121:6099:6103:6104:6106:6108
6099	tricarboxylic acid cycle	5 out of 117 genes, 4.3%	15 out of 7288 background genes, 0.2%	0.00123	SDH4:LSC2:KGD1:MDH1:FUM1	6121:6099:6103:6104:6106:6108
9987	cellular process	98 out of 117 genes, 83.8%	4701 out of 7288 background genes, 64.5%	0.00132	SSA1:CDC19:PRX1:ATP3:HSP26:FES1:TPS1:VMA2:PGI1:ILV6:GRX1:PGK1:MDH3:SED1:BMH2:SDH4:DPL1:QCR7:RIP1:RPL12A:PRB1:BMH1:PDA1:HSP12:PRE4:PNC1:RPT6:OLE1:ACB1:ERG25:RNR4:TRX2:LSC2:RPL8A:SBP1:ERG11:ARG4:BCY1:AYR1:KGD1:HYR1:URA2:TIF2:VPS55:OPI3:ATP2:HOM6:BAT2:FBA1:YNK1:MDH1:LAP4:SBA1:MRP8:GPT2:YEF3:ATP14:SEC61:COX8:ERV25:HMG1:PRE8:ERG13:NDE1:HSC82:PFK2:RPL20A:COX7:DSK2:PRE5:SIS1:PBI2:COX5A:POR1:SUN4:LAT1:LE…	6656:19655:15986:9098:8654:6696:77:6874:6116:103:18065:43248:6260:6511:6261:6409:9060:1321:6446:30503:183:6626:30433:6555:30435:6735:723:30437:6665:16070:6950:6121:84:6122:7103:6123:5975:7031:5977:7035:6888:6412:6413:6414:6090:6164:45324:7039:19413:6165:1:2:31204:6094:42493:11:6096:9142:6526:6631:6348:6097:1402:6098:6633:6811:6099:6635:6457:6458:6636:42026:52:6566:53:910:5980:7005:17062:6890:1985…
6108	malate metabolic process	3 out of 117 genes, 2.6%	3 out of 7288 background genes, 0.0%	0.00192	MDH3:MDH1:MDH2	6735:6094:6097:6099:6635:6108
44248	cellular catabolic process	20 out of 117 genes, 17.1%	409 out of 7288 background genes, 5.6%	0.00311	CDC19:PGI1:PGK1:SDH4:PRB1:PRE4:RPT6:LSC2:KGD1:BAT2:FBA1:MDH1:LAP4:PRE8:PFK2:DSK2:PRE5:PRE6:FUM1:GPH1	6511:30433:30435:6121:7103:6090:7039:6094:6096:6098:6099:5980:9082:9083:9267:6103:6104:6106:6108
44255	cellular lipid metabolic process	14 out of 117 genes, 12.0%	218 out of 7288 background genes, 3.0%	0.00432	MDH3:DPL1:OLE1:ACB1:ERG25:ERG11:AYR1:OPI3:GPT2:HMG1:ERG13:PEX11:ERG10:FAS2	6656:8654:6696:18065:6735:6665:7031:1:6631:6097:6633:6635:6636:16559:19395:9267:6108:15909:19722:6654
9056	catabolic process	20 out of 117 genes, 17.1%	423 out of 7288 background genes, 5.8%	0.00514	CDC19:PGI1:PGK1:SDH4:PRB1:PRE4:RPT6:LSC2:KGD1:BAT2:FBA1:MDH1:LAP4:PRE8:PFK2:DSK2:PRE5:PRE6:FUM1:GPH1	6511:30433:30435:6121:7103:6090:7039:6094:6096:6098:6099:5980:9082:9083:9267:6103:6104:6106:6108
6118	electron transport	6 out of 117 genes, 5.1%	33 out of 7288 background genes, 0.5%	0.00557	SDH4:QCR7:RIP1:COX8:COX7:COX5A	9060:6121:6122:6123:6099:17062
6084	acetyl-CoA metabolic process	5 out of 117 genes, 4.3%	20 out of 7288 background genes, 0.3%	0.00595	SDH4:LSC2:KGD1:MDH1:FUM1	6121:6099:6103:6104:6106:6108
9109	coenzyme catabolic process	5 out of 117 genes, 4.3%	20 out of 7288 background genes, 0.3%	0.00595	SDH4:LSC2:KGD1:MDH1:FUM1	6121:6099:6103:6104:6106:6108
51187	cofactor catabolic process	5 out of 117 genes, 4.3%	21 out of 7288 background genes, 0.3%	0.00771	SDH4:LSC2:KGD1:MDH1:FUM1	6121:6099:6103:6104:6106:6108
6629	lipid metabolic process	14 out of 117 genes, 12.0%	231 out of 7288 background genes, 3.2%	0.00837	MDH3:DPL1:OLE1:ACB1:ERG25:ERG11:AYR1:OPI3:GPT2:HMG1:ERG13:PEX11:ERG10:FAS2	6656:8654:6696:18065:6735:6665:7031:1:6631:6097:6633:6635:6636:16559:19395:9267:6108:15909:19722:6654
Function
GOID	GO_term	Cluster frequency	Background frequency	P-value	Gene(s) annotated to the term	Directly Annotated GOID List
16491	oxidoreductase activity	29 out of 117 genes, 24.8%	265 out of 7288 background genes, 3.6%	1.18e-14	PRX1:ARA1:GRX1:YCP4:MDH3:SDH4:QCR7:RIP1:PDA1:OLE1:ERG25:RNR4:TRX2:ERG11:AYR1:KGD1:HYR1:HOM6:MDH1:COX8:HMG1:NDE1:COX7:COX5A:MDH2:ALD4:GDH1:ALD6:FAS2	4028:4029:4315:4420:4129:4412:8379:4316:8398:4602:4354:8121:140:4364:30060:8897:45290:254:4591:9055:4739:47066:4748:3954:30508:4032:8177:4033:4768
3824	catalytic activity	66 out of 117 genes, 56.4%	1988 out of 7288 background genes, 27.3%	4.68e-09	SSA1:CDC19:PRX1:TPS1:VMA2:ARA1:PGI1:ILV6:GRX1:YCP4:PGK1:MDH3:SDH4:DPL1:QCR7:RIP1:PRB1:PDA1:PRE4:PNC1:RPT6:OLE1:ERG25:RNR4:TRX2:LSC2:ERG11:ARG4:AYR1:KGD1:HYR1:URA2:TIF2:OPI3:HOM6:BAT2:FBA1:YNK1:MDH1:LAP4:GPT2:COX8:HMG1:PRE8:ERG13:NDE1:HSC82:PFK2:COX7:PRE5:COX5A:SUN4:LAT1:LEU4:EGT2:PRE6:ARG1:MDH2:VPH1:ALD4:GDH1:ERG10:ALD6:FAS2:FUM1:GPH1	4332:51082:4333:4084:42623:4088:4550:140:8117:3825:4591:254:47066:4739:4775:30508:4055:4129:4412:8379:4056:4347:8121:3724:4742:15926:4743:45290:3872:4748:8810:3984:3985:4028:4029:4420:4315:4421:4316:4602:773:46961:4175:4354:30234:8897:3954:4032:8177:4033:4070:16887:4250:4252:8398:8936:4364:4366:3743:30060:4618:3852:9055:8184:4768
15078	hydrogen ion transporter activity	11 out of 117 genes, 9.4%	54 out of 7288 background genes, 0.7%	1.27e-07	ATP3:VMA2:QCR7:RIP1:ATP2:ATP14:COX8:COX7:COX5A:VPH1:ATP15	4129:8121:46961:46933
15077	monovalent inorganic cation transporter activity	11 out of 117 genes, 9.4%	59 out of 7288 background genes, 0.8%	3.49e-07	ATP3:VMA2:QCR7:RIP1:ATP2:ATP14:COX8:COX7:COX5A:VPH1:ATP15	4129:8121:46961:46933
15075	ion transporter activity	14 out of 117 genes, 12.0%	149 out of 7288 background genes, 2.0%	1.91e-05	ATP3:VMA2:ATO3:QCR7:RIP1:MIR1:ATP2:ATP14:COX8:COX7:COX5A:POR1:VPH1:ATP15	5315:8519:4129:8121:8308:46961:46933
8324	cation transporter activity	12 out of 117 genes, 10.3%	128 out of 7288 background genes, 1.8%	0.00017	ATP3:VMA2:ATO3:QCR7:RIP1:ATP2:ATP14:COX8:COX7:COX5A:VPH1:ATP15	8519:4129:8121:46961:46933
30060	L-malate dehydrogenase activity	3 out of 117 genes, 2.6%	3 out of 7288 background genes, 0.0%	0.00084	MDH3:MDH1:MDH2	30060
16616	oxidoreductase activity, acting on the CH-OH group of donors, NAD or NADP as acceptor	8 out of 117 genes, 6.8%	68 out of 7288 background genes, 0.9%	0.00241	ARA1:MDH3:AYR1:HOM6:MDH1:HMG1:MDH2:FAS2	140:4412:45290:4315:4420:4316:8897:4032:4033:30060
16615	malate dehydrogenase activity	3 out of 117 genes, 2.6%	4 out of 7288 background genes, 0.1%	0.00334	MDH3:MDH1:MDH2	30060
16614	oxidoreductase activity, acting on CH-OH group of donors	8 out of 117 genes, 6.8%	76 out of 7288 background genes, 1.0%	0.00553	ARA1:MDH3:AYR1:HOM6:MDH1:HMG1:MDH2:FAS2	140:4412:45290:4315:4420:4316:8897:4032:4033:30060
Component
GOID	GO_term	Cluster frequency	Background frequency	P-value	Gene(s) annotated to the term	Directly Annotated GOID List
44444	cytoplasmic part	93 out of 117 genes, 79.5%	2700 out of 7288 background genes, 37.0%	5.77e-19	SSA1:CDC19:PRX1:ATP3:FES1:TPS1:VMA2:ARA1:PGI1:YBR241C:ILV6:YCP4:PGK1:NPC2:YET3:MDH3:TMA17:PST2:SED1:SDH4:RTN1:DPL1:ATO3:QCR7:RIP1:RPL12A:PRB1:FMP52:PDA1:PNC1:OLE1:ERG25:RNR4:TRX2:FMP43:LSC2:RPL8A:ERG11:ARG4:AYR1:KGD1:URA2:TIF2:VPS55:OPI3:MIR1:ATP2:FBA1:YET1:YNK1:MDH1:LAP4:MRP8:GPT2:YEF3:ATP14:DIC1:SEC61:COX8:ERV25:HMG1:ERG13:MIC17:NDE1:HSC82:PFK2:RPL20A:COX7:SIS1:PBI2:COX5A:POR1:SUN4:LAT1:LEU4:PR…	5749:5782:5945:5783:5784:5946:5948:9277:5788:5967:5789:16281:42645:5625:324:5750:328:31307:5751:5840:329:5842:5737:5843:5754:5770:276:5739:5756:5829:9353:5758:5759:5777:5971:5778:5794:19773:5886:220:221:30134:5811:31206:5634:5635:5740:5830:5741:16021:5832:5761:5835:30176:5853
5737	cytoplasm	105 out of 117 genes, 89.7%	3694 out of 7288 background genes, 50.7%	1.62e-17	SSA1:CDC19:PRX1:ATP3:HSP26:FES1:TPS1:VMA2:ARA1:PGI1:YBR241C:ILV6:GRX1:YCP4:PGK1:NPC2:YET3:MDH3:TMA17:PST2:SED1:SDH4:RTN1:DPL1:ATO3:QCR7:RIP1:RPL12A:PRB1:FMP52:YER067W:PDA1:HSP12:PNC1:OLE1:ACB1:ERG25:RNR4:TRX2:FMP43:LSC2:RPL8A:ERG11:ARG4:BCY1:AYR1:KGD1:URA2:TIF2:VPS55:OPI3:MIR1:ATP2:HOM6:BAT2:FBA1:YET1:YNK1:MDH1:LAP4:SBA1:MRP8:GPT2:YEF3:ATP14:DIC1:SEC61:COX8:ERV25:HMG1:ERG13:MIC17:NDE1:HSC82:PFK2:…	5749:5782:5945:5783:5784:5946:5948:9277:5788:5967:5789:16281:42645:5625:324:5750:328:31307:5751:5840:329:5842:5737:5843:5754:5770:276:5739:5756:5829:9353:5758:5759:5971:5777:5778:5794:19773:5886:220:221:30134:5811:31206:5634:5635:5740:5741:5830:16021:5832:5761:5835:30176:5853
44464	cell part	117 out of 117 genes, 100.0%	5495 out of 7288 background genes, 75.4%	5.16e-13	SSA1:CDC19:PRX1:YBR016W:ATP3:HSP26:FES1:TPS1:VMA2:ARA1:PGI1:YBR241C:ILV6:GRX1:YCP4:PGK1:NPC2:YET3:MDH3:TMA17:PST2:SED1:BMH2:SDH4:RTN1:DPL1:ATO3:ITR1:QCR7:RIP1:RPL12A:PRB1:FMP52:YER067W:BMH1:PDA1:HSP12:PRE4:PNC1:RPT6:OLE1:ACB1:ERG25:RNR4:TRX2:FMP43:LSC2:RPL8A:SBP1:ERG11:ARG4:BCY1:AYR1:KGD1:HYR1:URA2:TIF2:VPS55:OPI3:MIR1:ATP2:HOM6:BAT2:FBA1:YET1:YNK1:MDH1:LAP4:SBA1:MRP8:GPT2:YEF3:ATP14:DIC1:SEC61:C…	5749:5782:5945:5783:5784:5946:5948:9277:5788:5967:5789:16281:5622:42645:5625:5730:324:5750:328:31307:5751:5840:329:5842:5737:5843:5754:5770:5933:276:5739:5756:5829:9353:5758:5759:5971:5777:5778:5794:19773:19774:5886:220:221:30134:5811:31206:5634:5635:5740:5741:16020:5830:16021:5832:5761:5835:8540:30176:5853
5622	intracellular	114 out of 117 genes, 97.4%	5087 out of 7288 background genes, 69.8%	1.34e-12	SSA1:CDC19:PRX1:ATP3:HSP26:FES1:TPS1:VMA2:ARA1:PGI1:YBR241C:ILV6:GRX1:YCP4:PGK1:NPC2:YET3:MDH3:TMA17:PST2:SED1:BMH2:SDH4:RTN1:DPL1:ATO3:QCR7:RIP1:RPL12A:PRB1:FMP52:YER067W:BMH1:PDA1:HSP12:PRE4:PNC1:RPT6:OLE1:ACB1:ERG25:RNR4:TRX2:FMP43:LSC2:RPL8A:SBP1:ERG11:ARG4:BCY1:AYR1:KGD1:HYR1:URA2:TIF2:VPS55:OPI3:MIR1:ATP2:HOM6:BAT2:FBA1:YET1:YNK1:MDH1:LAP4:SBA1:MRP8:GPT2:YEF3:ATP14:DIC1:SEC61:COX8:ERV25:HMG…	5749:5782:5945:5783:5784:5946:5948:9277:5788:5967:5789:16281:5622:42645:5625:5730:324:5750:328:31307:5751:5840:329:5842:5737:5843:5754:5770:276:5739:5756:5829:9353:5758:5759:5971:5777:5778:5794:19773:19774:5886:220:221:30134:5811:31206:5634:5635:5740:5741:5830:16021:5832:5761:5835:8540:30176:5853
44424	intracellular part	113 out of 117 genes, 96.6%	5052 out of 7288 background genes, 69.3%	8.34e-12	SSA1:CDC19:PRX1:ATP3:HSP26:FES1:TPS1:VMA2:ARA1:PGI1:YBR241C:ILV6:GRX1:YCP4:PGK1:NPC2:YET3:MDH3:TMA17:PST2:SED1:BMH2:SDH4:RTN1:DPL1:ATO3:QCR7:RIP1:RPL12A:PRB1:FMP52:YER067W:BMH1:PDA1:HSP12:PRE4:PNC1:RPT6:OLE1:ACB1:ERG25:RNR4:TRX2:FMP43:LSC2:RPL8A:SBP1:ERG11:ARG4:BCY1:AYR1:KGD1:URA2:TIF2:VPS55:OPI3:MIR1:ATP2:HOM6:BAT2:FBA1:YET1:YNK1:MDH1:LAP4:SBA1:MRP8:GPT2:YEF3:ATP14:DIC1:SEC61:COX8:ERV25:HMG1:PRE…	5749:5782:5945:5783:5784:5946:5948:9277:5788:5967:5789:16281:42645:5625:5730:324:5750:328:31307:5751:5840:329:5842:5737:5843:5754:5770:276:5739:5756:5829:9353:5758:5759:5971:5777:5778:5794:19773:19774:5886:220:221:30134:5811:31206:5634:5635:5740:5741:5830:16021:5832:5761:5835:8540:30176:5853
43229	intracellular organelle	101 out of 117 genes, 86.3%	4021 out of 7288 background genes, 55.2%	5.86e-11	SSA1:PRX1:ATP3:HSP26:FES1:VMA2:PGI1:YBR241C:ILV6:GRX1:YCP4:PGK1:NPC2:YET3:MDH3:TMA17:PST2:SED1:BMH2:SDH4:RTN1:DPL1:ATO3:QCR7:RIP1:RPL12A:PRB1:FMP52:YER067W:BMH1:PDA1:HSP12:PNC1:RPT6:OLE1:ACB1:ERG25:RNR4:TRX2:FMP43:LSC2:RPL8A:SBP1:ERG11:BCY1:AYR1:KGD1:URA2:TIF2:VPS55:OPI3:MIR1:ATP2:HOM6:BAT2:FBA1:YET1:YNK1:MDH1:LAP4:SBA1:MRP8:GPT2:YEF3:ATP14:DIC1:SEC61:COX8:ERV25:HMG1:ERG13:MIC17:NDE1:HSC82:PFK2:R…	5749:5782:5945:5783:5784:5948:9277:5788:5967:5789:16281:42645:5625:5730:324:5750:328:31307:5751:5840:329:5842:5737:5843:5754:5770:276:5739:5829:5756:9353:5758:5759:5971:5777:5778:5794:19773:5886:220:221:30134:5811:31206:5634:5635:5740:5741:5830:16021:5832:5761:5835:8540:30176:5853
43226	organelle	101 out of 117 genes, 86.3%	4022 out of 7288 background genes, 55.2%	5.99e-11	SSA1:PRX1:ATP3:HSP26:FES1:VMA2:PGI1:YBR241C:ILV6:GRX1:YCP4:PGK1:NPC2:YET3:MDH3:TMA17:PST2:SED1:BMH2:SDH4:RTN1:DPL1:ATO3:QCR7:RIP1:RPL12A:PRB1:FMP52:YER067W:BMH1:PDA1:HSP12:PNC1:RPT6:OLE1:ACB1:ERG25:RNR4:TRX2:FMP43:LSC2:RPL8A:SBP1:ERG11:BCY1:AYR1:KGD1:URA2:TIF2:VPS55:OPI3:MIR1:ATP2:HOM6:BAT2:FBA1:YET1:YNK1:MDH1:LAP4:SBA1:MRP8:GPT2:YEF3:ATP14:DIC1:SEC61:COX8:ERV25:HMG1:ERG13:MIC17:NDE1:HSC82:PFK2:R…	5749:5782:5945:5783:5784:5948:9277:5788:5967:5789:16281:42645:5625:5730:324:5750:328:31307:5751:5840:329:5842:5737:5843:5754:5770:276:5739:5829:5756:9353:5758:5759:5971:5777:5778:5794:19773:5886:220:221:30134:5811:31206:5634:5635:5740:5741:5830:16021:5832:5761:5835:8540:30176:5853
5739	mitochondrion	50 out of 117 genes, 42.7%	1103 out of 7288 background genes, 15.1%	6.98e-11	PRX1:ATP3:PGI1:ILV6:YCP4:PGK1:PST2:SED1:SDH4:RTN1:ATO3:QCR7:RIP1:FMP52:PDA1:FMP43:LSC2:AYR1:KGD1:URA2:OPI3:MIR1:ATP2:FBA1:YNK1:MDH1:MRP8:ATP14:DIC1:COX8:HMG1:MIC17:NDE1:HSC82:PFK2:COX7:COX5A:POR1:SUN4:LAT1:LEU4:PRE6:YOR285W:ALD4:ALD6:FAS2:FUM1:ATP15:TEF1:NCE102	5749:5945:5783:9277:5948:5967:5789:42645:5625:5750:31307:5751:5840:5737:5754:276:5739:5829:5756:9353:5758:5759:5794:19773:5886:5811:5634:5635:5740:5741:16021:5761:5835:5853
44429	mitochondrial part	28 out of 117 genes, 23.9%	443 out of 7288 background genes, 6.1%	3.04e-08	ATP3:ILV6:SDH4:QCR7:RIP1:FMP52:PDA1:AYR1:KGD1:MIR1:ATP2:YNK1:MDH1:MRP8:ATP14:DIC1:COX8:HMG1:MIC17:COX7:COX5A:POR1:SUN4:LAT1:YOR285W:ALD4:FUM1:ATP15	5749:5783:9277:5948:5789:5967:42645:5625:5750:31307:5751:5737:5754:276:5739:5829:5756:9353:5758:5759:5811:5634:5635:5740:5741:5761
43227	membrane-bound organelle	90 out of 117 genes, 76.9%	3674 out of 7288 background genes, 50.4%	4.21e-07	SSA1:PRX1:ATP3:HSP26:VMA2:PGI1:YBR241C:ILV6:GRX1:YCP4:PGK1:NPC2:YET3:MDH3:TMA17:PST2:SED1:BMH2:SDH4:RTN1:DPL1:ATO3:QCR7:RIP1:PRB1:FMP52:YER067W:BMH1:PDA1:HSP12:PNC1:RPT6:OLE1:ACB1:ERG25:RNR4:TRX2:FMP43:LSC2:SBP1:ERG11:BCY1:AYR1:KGD1:URA2:VPS55:OPI3:MIR1:ATP2:HOM6:BAT2:FBA1:YET1:YNK1:MDH1:LAP4:SBA1:MRP8:GPT2:ATP14:DIC1:SEC61:COX8:ERV25:HMG1:ERG13:MIC17:NDE1:HSC82:PFK2:COX7:DSK2:PBI2:COX5A:POR1:SUN…	5749:5782:5945:5783:5784:5948:9277:5788:5967:5789:42645:5625:5730:324:5750:328:31307:5751:5840:329:5737:5754:5770:276:5739:5829:5756:9353:5758:5759:5971:5777:5778:5794:19773:5886:220:221:30134:5811:31206:5634:5635:5740:5741:16021:5832:5761:5835:8540:30176:5853
43231	intracellular membrane-bound organelle	90 out of 117 genes, 76.9%	3674 out of 7288 background genes, 50.4%	4.21e-07	SSA1:PRX1:ATP3:HSP26:VMA2:PGI1:YBR241C:ILV6:GRX1:YCP4:PGK1:NPC2:YET3:MDH3:TMA17:PST2:SED1:BMH2:SDH4:RTN1:DPL1:ATO3:QCR7:RIP1:PRB1:FMP52:YER067W:BMH1:PDA1:HSP12:PNC1:RPT6:OLE1:ACB1:ERG25:RNR4:TRX2:FMP43:LSC2:SBP1:ERG11:BCY1:AYR1:KGD1:URA2:VPS55:OPI3:MIR1:ATP2:HOM6:BAT2:FBA1:YET1:YNK1:MDH1:LAP4:SBA1:MRP8:GPT2:ATP14:DIC1:SEC61:COX8:ERV25:HMG1:ERG13:MIC17:NDE1:HSC82:PFK2:COX7:DSK2:PBI2:COX5A:POR1:SUN…	5749:5782:5945:5783:5784:5948:9277:5788:5967:5789:42645:5625:5730:324:5750:328:31307:5751:5840:329:5737:5754:5770:276:5739:5829:5756:9353:5758:5759:5971:5777:5778:5794:19773:5886:220:221:30134:5811:31206:5634:5635:5740:5741:16021:5832:5761:5835:8540:30176:5853
44455	mitochondrial membrane part	11 out of 117 genes, 9.4%	98 out of 7288 background genes, 1.3%	6.17e-05	ATP3:SDH4:QCR7:RIP1:ATP2:ATP14:COX8:COX7:COX5A:POR1:ATP15	5749:5625:5750:31307:5751:5754:276:5739:5756:5741
5740	mitochondrial envelope	18 out of 117 genes, 15.4%	288 out of 7288 background genes, 4.0%	9.83e-05	ATP3:SDH4:QCR7:RIP1:FMP52:AYR1:MIR1:ATP2:YNK1:ATP14:DIC1:COX8:MIC17:COX7:COX5A:POR1:YOR285W:ATP15	5749:5783:5625:5750:31307:5751:5737:5754:276:5739:5829:5756:5758:5811:5634:5740:5741
5746	mitochondrial electron transport chain	6 out of 117 genes, 5.1%	26 out of 7288 background genes, 0.4%	0.00041	SDH4:QCR7:RIP1:COX8:COX7:COX5A	5749:5750:5751:5739
31090	organelle membrane	25 out of 117 genes, 21.4%	619 out of 7288 background genes, 8.5%	0.00187	SSA1:ATP3:VMA2:YBR241C:SDH4:RTN1:QCR7:RIP1:FMP52:OLE1:ERG25:AYR1:ATP2:YET1:ATP14:SEC61:COX8:HMG1:COX7:COX5A:POR1:PEX11:VPH1:YOR285W:ATP15	5749:5783:5784:9277:5788:5789:5625:5750:31307:5751:5840:329:5737:5754:276:5739:5756:5759:5778:5794:5886:220:221:5811:31206:5634:5635:5741:5832:30176
31967	organelle envelope	19 out of 117 genes, 16.2%	392 out of 7288 background genes, 5.4%	0.00204	ATP3:SDH4:QCR7:RIP1:FMP52:AYR1:MIR1:ATP2:YNK1:ATP14:DIC1:COX8:HMG1:MIC17:COX7:COX5A:POR1:YOR285W:ATP15	5749:5783:5789:5625:5750:31307:5751:5737:5754:276:5739:5829:5756:5758:5759:5811:5634:5635:5740:5741
31975	envelope	19 out of 117 genes, 16.2%	392 out of 7288 background genes, 5.4%	0.00204	ATP3:SDH4:QCR7:RIP1:FMP52:AYR1:MIR1:ATP2:YNK1:ATP14:DIC1:COX8:HMG1:MIC17:COX7:COX5A:POR1:YOR285W:ATP15	5749:5783:5789:5625:5750:31307:5751:5737:5754:276:5739:5829:5756:5758:5759:5811:5634:5635:5740:5741
16469	proton-transporting two-sector ATPase complex	6 out of 117 genes, 5.1%	35 out of 7288 background genes, 0.5%	0.00262	ATP3:VMA2:ATP2:ATP14:VPH1:ATP15	5625:329:5737:5754:276:5739:5756:220:221
44425	membrane part	24 out of 117 genes, 20.5%	614 out of 7288 background genes, 8.4%	0.00498	ATP3:VMA2:SDH4:RTN1:QCR7:RIP1:FMP52:OLE1:ERG25:AYR1:URA2:ATP2:YET1:ATP14:SEC61:COX8:HMG1:COX7:COX5A:POR1:VPH1:YOR285W:ATP15:NCE102	5749:5783:5784:5788:5789:5625:5750:329:31307:5751:5840:5737:5754:276:5739:5756:5759:5794:5886:220:221:5811:31206:5635:5741:16021:30176
5829	cytosol	24 out of 117 genes, 20.5%	617 out of 7288 background genes, 8.5%	0.0054	SSA1:CDC19:FES1:ARA1:PGI1:RPL12A:TRX2:RPL8A:ARG4:FBA1:YNK1:PFK2:RPL20A:SIS1:PRE6:RPP2A:ARG1:MDH2:ERG10:ALD6:RPL5:RPL1A:FUM1:RPL11A	5945:9277:324:329:5842:5737:5843:5739:5829:5758:5759:19773:5634:5830:5832
31966	mitochondrial membrane	14 out of 117 genes, 12.0%	247 out of 7288 background genes, 3.4%	0.00584	ATP3:SDH4:QCR7:RIP1:FMP52:AYR1:ATP2:ATP14:COX8:COX7:COX5A:POR1:YOR285W:ATP15	5749:5783:5625:5750:31307:5751:5737:5754:276:5739:5756:5811:5741
275	mitochondrial proton-transporting ATP synthase complex, catalytic core F(1)	3 out of 117 genes, 2.6%	5 out of 7288 background genes, 0.1%	0.00618	ATP3:ATP2:ATP15	5625:5754:5739:5756
45261	proton-transporting ATP synthase complex, catalytic core F(1)	3 out of 117 genes, 2.6%	5 out of 7288 background genes, 0.1%	0.00618	ATP3:ATP2:ATP15	5625:5754:5739:5756
Bi-Cluster 11	score = 535			Mean pattern, and conditions
YGR037C	ACB1	YGR037C
YPL061W	ALD6	YPL061W
YOR374W	ALD4	YOR374W
YOL058W	ARG1	YOL058W
YLR295C	ATP14	YLR295C
YPL271W	ATP15	YPL271W
YBR039W	ATP3	YBR039W
YER177W	BMH1	YER177W
YNL052W	COX5A	YNL052W
YMR256C	COX7	YMR256C
YLR395C	COX8	YLR395C
YMR276W	DSK2	YMR276W
YJR137C	ECM17	YJR137C
YHR007C	ERG11	YHR007C
YGR060W	ERG25	YGR060W
YPL231W	FAS2	YPL231W
YKL060C	FBA1	YKL060C
YAL044C	GCV3	YAL044C
YOR375C	GDH1	YOR375C
YCL030C	HIS4	YCL030C
YJR139C	HOM6	YJR139C
YMR186W	HSC82	YMR186W
YFL014W	HSP12	YFL014W
YBR072W	HSP26	YBR072W
YJR016C	ILV3	YJR016C
YCL009C	ILV6	YCL009C
YDR497C	ITR1	YDR497C
YNL104C	LEU4	YNL104C
YJR077C	MIR1	YJR077C
YPR149W	NCE102	YPR149W
YOR310C	NOP58	YOR310C
YGL055W	OLE1	YGL055W
YER165W	PAB1	YER165W
YNL015W	PBI2	YNL015W
YGR240C	PFK1	YGR240C
YMR205C	PFK2	YMR205C
YBR196C	PGI1	YBR196C
YCR012W	PGK1	YCR012W
YBR106W	PHO88	YBR106W
YGL008C	PMA1	YGL008C
YNL055C	POR1	YNL055C
YEL060C	PRB1	YEL060C
YML092C	PRE8	YML092C
YAL038W	CDC19	YAL038W
YDR529C	QCR7	YDR529C
YGR180C	RNR4	YGR180C
YPR102C	RPL11A	YPR102C
YEL054C	RPL12A	YEL054C
YPL220W	RPL1A	YPL220W
YMR242C	RPL20A	YMR242C
YOR063W	RPL3	YOR063W
YPL131W	RPL5	YPL131W
YHL033C	RPL8A	YHL033C
YOL039W	RPP2A	YOL039W
YML063W	RPS1B	YML063W
YHL034C	SBP1	YHL034C
YDR077W	SED1	YDR077W
YAL005C	SSA1	YAL005C
YPL106C	SSE1	YPL106C
YOR027W	STI1	YOR027W
YPR080W	TEF1	YPR080W
YJL138C	TIF2	YJL138C
YJL130C	URA2	YJL130C
YBR127C	VMA2	YBR127C
YOR270C	VPH1	YOR270C
YCR004C	YCP4	YCR004C
YNL064C	YDJ1	YNL064C
YDR032C	PST2	YDR032C
YDR033W	MRH1	YDR033W
YDR233C	RTN1	YDR233C
YLR249W	YEF3	YLR249W
YGR234W	YHB1	YGR234W
YHR162W	non	YHR162W
YLR432W	IMD3	YLR432W
GO Enrichments
Process
GOID	GO_term	Cluster frequency	Background frequency	P-value	Gene(s) annotated to the term	Directly Annotated GOID List
44237	cellular metabolic process	61 out of 74 genes, 82.4%	3429 out of 7288 background genes, 47.0%	1.11e-07	SSA1:CDC19:GCV3:ATP3:HSP26:PGI1:ILV6:HIS4:PGK1:QCR7:RPL12A:PRB1:PAB1:BMH1:HSP12:OLE1:ACB1:ERG25:RNR4:PFK1:RPL8A:SBP1:ERG11:URA2:TIF2:ILV3:ECM17:HOM6:FBA1:YEF3:ATP14:COX8:IMD3:RPS1B:PRE8:HSC82:PFK2:RPL20A:COX7:DSK2:PBI2:COX5A:POR1:YDJ1:LEU4:RPP2A:ARG1:STI1:RPL3:VPH1:NOP58:ALD4:GDH1:ALD6:SSE1:RPL5:RPL1A:FAS2:ATP15:TEF1:RPL11A	15986:9098:8652:6696:77:103:105:18065:43248:6511:6260:6409:9060:6446:6730:6626:30433:6555:30435:723:30437:6950:84:6122:7103:6123:5977:7035:6412:6413:6414:6090:7039:19413:1:6094:154:42493:6096:6526:6631:6098:1402:6633:6811:6457:6458:6636:42026:52:6566:53:7005:17062:19856:6207:45047:6067:7047:7155:6461:30162:7265:6537:9082:27:9408:60:42144:9267:30490:9269:42254:6972:6797:7124:51436:6979:6183:15909:…
8152	metabolic process	61 out of 74 genes, 82.4%	3509 out of 7288 background genes, 48.1%	3.54e-07	SSA1:CDC19:GCV3:ATP3:HSP26:PGI1:ILV6:HIS4:PGK1:QCR7:RPL12A:PRB1:PAB1:BMH1:HSP12:OLE1:ACB1:ERG25:RNR4:PFK1:RPL8A:SBP1:ERG11:URA2:TIF2:ILV3:ECM17:HOM6:FBA1:YEF3:ATP14:COX8:IMD3:RPS1B:PRE8:HSC82:PFK2:RPL20A:COX7:DSK2:PBI2:COX5A:POR1:YDJ1:LEU4:RPP2A:ARG1:STI1:RPL3:VPH1:NOP58:ALD4:GDH1:ALD6:SSE1:RPL5:RPL1A:FAS2:ATP15:TEF1:RPL11A	15986:9098:8652:6696:77:103:105:18065:43248:6511:6260:6409:9060:6446:6730:6626:30433:6555:30435:30437:723:6950:84:6122:7103:6123:5977:7035:6412:6413:6414:6090:7039:19413:1:6094:154:42493:6096:6526:6631:1402:6098:6633:6811:6457:6458:6636:42026:52:6566:53:7005:17062:19856:6207:45047:6067:7047:7155:6461:30162:7265:6537:9082:9408:27:60:42144:9267:30490:9269:42254:6972:6797:7124:51436:6979:6183:15909:…
19752	carboxylic acid metabolic process	18 out of 74 genes, 24.3%	308 out of 7288 background genes, 4.2%	3.67e-07	CDC19:GCV3:PGI1:ILV6:HIS4:PGK1:OLE1:ACB1:URA2:ILV3:ECM17:HOM6:FBA1:LEU4:ARG1:GDH1:ALD6:FAS2	9098:8652:103:105:18065:6730:6555:723:6090:19413:1:6094:42493:6096:6526:6631:6098:6633:6636:52:6566:53:19856:6207:7047:6537:9082:15909:6541:6546:9090
6082	organic acid metabolic process	18 out of 74 genes, 24.3%	308 out of 7288 background genes, 4.2%	3.67e-07	CDC19:GCV3:PGI1:ILV6:HIS4:PGK1:OLE1:ACB1:URA2:ILV3:ECM17:HOM6:FBA1:LEU4:ARG1:GDH1:ALD6:FAS2	9098:8652:103:105:18065:6730:6555:723:6090:19413:1:6094:42493:6096:6526:6631:6098:6633:6636:52:6566:53:19856:6207:7047:6537:9082:15909:6541:6546:9090
9058	biosynthetic process	34 out of 74 genes, 45.9%	1220 out of 7288 background genes, 16.7%	1.44e-06	SSA1:ATP3:PGI1:ILV6:HIS4:PGK1:RPL12A:PAB1:ERG25:RPL8A:ERG11:URA2:TIF2:ILV3:ECM17:HOM6:FBA1:YEF3:ATP14:IMD3:RPS1B:RPL20A:LEU4:RPP2A:ARG1:RPL3:GDH1:ALD6:RPL5:RPL1A:FAS2:ATP15:TEF1:RPL11A	15986:9098:8652:6696:103:105:18065:6409:6446:6626:6555:6950:6412:6413:6414:19413:6094:42493:6096:6526:6098:6633:6457:42026:52:6566:53:19856:6207:7047:6537:9082:27:60:42254:6183:6541:6616:9090
44249	cellular biosynthetic process	32 out of 74 genes, 43.2%	1143 out of 7288 background genes, 15.7%	5.03e-06	SSA1:ATP3:PGI1:ILV6:HIS4:PGK1:RPL12A:PAB1:RPL8A:URA2:TIF2:ILV3:ECM17:HOM6:FBA1:YEF3:ATP14:IMD3:RPS1B:RPL20A:LEU4:RPP2A:ARG1:RPL3:GDH1:ALD6:RPL5:RPL1A:FAS2:ATP15:TEF1:RPL11A	15986:9098:8652:103:105:18065:6409:6446:6626:6555:6950:6412:6413:6414:19413:6094:42493:6096:6526:6098:6633:6457:42026:52:6566:53:19856:6207:7047:6537:9082:27:60:42254:6183:6541:6616:9090
6096	glycolysis	6 out of 74 genes, 8.1%	24 out of 7288 background genes, 0.3%	3.99e-05	CDC19:PGI1:PGK1:PFK1:FBA1:PFK2	6090:6094:6096:6098
6119	oxidative phosphorylation	7 out of 74 genes, 9.5%	46 out of 7288 background genes, 0.6%	0.00012	ATP3:QCR7:ATP14:COX8:COX7:COX5A:ATP15	15986:9060:6122:6123:17062
44238	primary metabolic process	54 out of 74 genes, 73.0%	3207 out of 7288 background genes, 44.0%	0.00014	SSA1:CDC19:GCV3:ATP3:HSP26:PGI1:ILV6:HIS4:PGK1:QCR7:RPL12A:PRB1:PAB1:BMH1:OLE1:ACB1:ERG25:RNR4:PFK1:RPL8A:SBP1:ERG11:URA2:TIF2:ILV3:ECM17:HOM6:FBA1:YEF3:ATP14:IMD3:RPS1B:PRE8:HSC82:PFK2:RPL20A:DSK2:PBI2:YDJ1:LEU4:RPP2A:ARG1:STI1:RPL3:VPH1:NOP58:GDH1:SSE1:RPL5:RPL1A:FAS2:ATP15:TEF1:RPL11A	15986:9098:8652:6696:77:103:105:18065:43248:6511:6260:6409:9060:6446:6730:6626:30433:6555:30435:30437:723:6950:84:6122:7103:5977:7035:6412:6413:6414:6090:7039:1:6094:154:42493:6096:6526:6631:1402:6098:6633:6457:6458:6636:42026:52:6566:53:17062:19856:6207:45047:7047:6461:30162:7265:6537:9082:27:60:42144:9267:30490:42254:6797:7124:51436:6183:15909:6541:6365:6616:6546:9090
6007	glucose catabolic process	6 out of 74 genes, 8.1%	34 out of 7288 background genes, 0.5%	0.00036	CDC19:PGI1:PGK1:PFK1:FBA1:PFK2	6090:6094:6096:6098
6091	generation of precursor metabolites and energy	15 out of 74 genes, 20.3%	336 out of 7288 background genes, 4.6%	0.00038	CDC19:ATP3:PGI1:PGK1:QCR7:BMH1:PFK1:FBA1:ATP14:COX8:PFK2:COX7:COX5A:POR1:ATP15	15986:77:9060:30437:6122:6123:5977:6090:6094:6096:1402:6098:6811:7005:17062:7265:7124:51436
42026	protein refolding	4 out of 74 genes, 5.4%	9 out of 7288 background genes, 0.1%	0.00045	SSA1:HSC82:YDJ1:SSE1	43248:6626:30433:723:6950:6412:42493:6457:6458:42026:45047:60:6616
19320	hexose catabolic process	6 out of 74 genes, 8.1%	37 out of 7288 background genes, 0.5%	0.00062	CDC19:PGI1:PGK1:PFK1:FBA1:PFK2	6090:6094:6096:6098
46365	monosaccharide catabolic process	6 out of 74 genes, 8.1%	42 out of 7288 background genes, 0.6%	0.00134	CDC19:PGI1:PGK1:PFK1:FBA1:PFK2	6090:6094:6096:6098
9987	cellular process	65 out of 74 genes, 87.8%	4701 out of 7288 background genes, 64.5%	0.00191	SSA1:CDC19:GCV3:ATP3:HSP26:PHO88:VMA2:PGI1:ILV6:HIS4:PGK1:SED1:QCR7:RPL12A:PRB1:PAB1:BMH1:HSP12:OLE1:ACB1:ERG25:RNR4:PFK1:RPL8A:SBP1:ERG11:URA2:TIF2:ILV3:ECM17:HOM6:FBA1:YEF3:ATP14:COX8:IMD3:RPS1B:PRE8:HSC82:PFK2:RPL20A:COX7:DSK2:PBI2:COX5A:POR1:YDJ1:LEU4:RPP2A:ARG1:STI1:RPL3:VPH1:NOP58:ALD4:GDH1:ALD6:SSE1:RPL5:RPL1A:FAS2:ATP15:TEF1:RPL11A:NCE102	15986:9098:8652:6696:77:6874:103:105:18065:43248:6511:6260:6409:9060:6446:6730:6626:30433:6555:30435:30437:723:6950:84:6122:7103:6123:5977:7035:6412:6413:6414:6090:7039:19413:1:2:6094:154:42493:6096:6526:6631:1402:6098:6633:6811:6457:6458:6636:42026:52:6566:6817:53:7005:17062:19856:6207:45047:6067:7047:7155:6461:30162:7265:6537:9082:9408:27:60:42144:9267:30490:9269:42254:6972:6797:7124:51436:6979…
46164	alcohol catabolic process	6 out of 74 genes, 8.1%	45 out of 7288 background genes, 0.6%	0.00204	CDC19:PGI1:PGK1:PFK1:FBA1:PFK2	6090:6094:6096:6098
8652	amino acid biosynthetic process	8 out of 74 genes, 10.8%	103 out of 7288 background genes, 1.4%	0.00325	ILV6:HIS4:ILV3:ECM17:HOM6:LEU4:ARG1:GDH1	9098:8652:103:105:6555:42493:6526:52:6566:53:7047:6537:9082:9090
44271	nitrogen compound biosynthetic process	8 out of 74 genes, 10.8%	111 out of 7288 background genes, 1.5%	0.00565	ILV6:HIS4:ILV3:ECM17:HOM6:LEU4:ARG1:GDH1	9098:8652:103:105:6555:42493:6526:52:6566:53:7047:6537:9082:9090
9309	amine biosynthetic process	8 out of 74 genes, 10.8%	111 out of 7288 background genes, 1.5%	0.00565	ILV6:HIS4:ILV3:ECM17:HOM6:LEU4:ARG1:GDH1	9098:8652:103:105:6555:42493:6526:52:6566:53:7047:6537:9082:9090
6520	amino acid metabolic process	10 out of 74 genes, 13.5%	185 out of 7288 background genes, 2.5%	0.00588	GCV3:ILV6:HIS4:URA2:ILV3:ECM17:HOM6:LEU4:ARG1:GDH1	9098:8652:103:105:6730:6555:723:42493:6526:52:6566:53:19856:6207:7047:6537:9082:6541:6546:9090
Function
GOID	GO_term	Cluster frequency	Background frequency	P-value	Gene(s) annotated to the term	Directly Annotated GOID List
16491	oxidoreductase activity	19 out of 74 genes, 25.7%	265 out of 7288 background genes, 3.6%	1.31e-09	GCV3:HIS4:YCP4:QCR7:OLE1:ERG25:RNR4:YHB1:ERG11:ECM17:HOM6:COX8:IMD3:COX7:COX5A:ALD4:GDH1:ALD6:FAS2	4028:16966:4029:4315:4129:4412:4316:8398:4354:8121:4375:4635:4636:8897:254:9055:4399:4748:3938:4783:4768
15078	hydrogen ion transporter activity	10 out of 74 genes, 13.5%	54 out of 7288 background genes, 0.7%	1.62e-08	ATP3:VMA2:QCR7:PMA1:ATP14:COX8:COX7:COX5A:VPH1:ATP15	8553:4129:46933:46961:8121
15077	monovalent inorganic cation transporter activity	10 out of 74 genes, 13.5%	59 out of 7288 background genes, 0.8%	4.1e-08	ATP3:VMA2:QCR7:PMA1:ATP14:COX8:COX7:COX5A:VPH1:ATP15	8553:4129:46933:46961:8121
15075	ion transporter activity	13 out of 74 genes, 17.6%	149 out of 7288 background genes, 2.0%	3.6e-07	ATP3:PHO88:VMA2:QCR7:PMA1:MIR1:ATP14:COX8:COX7:COX5A:POR1:VPH1:ATP15	8553:4129:46933:5315:46961:8121:8308:15114
8324	cation transporter activity	10 out of 74 genes, 13.5%	128 out of 7288 background genes, 1.8%	8.49e-05	ATP3:VMA2:QCR7:PMA1:ATP14:COX8:COX7:COX5A:VPH1:ATP15	8553:4129:46933:46961:8121
3824	catalytic activity	38 out of 74 genes, 51.4%	1988 out of 7288 background genes, 27.3%	0.00136	SSA1:CDC19:GCV3:VMA2:PGI1:ILV6:HIS4:YCP4:PGK1:QCR7:PRB1:PMA1:OLE1:ERG25:RNR4:YHB1:PFK1:ERG11:URA2:TIF2:ILV3:ECM17:HOM6:FBA1:COX8:IMD3:PRE8:HSC82:PFK2:COX7:COX5A:LEU4:ARG1:VPH1:ALD4:GDH1:ALD6:FAS2	3984:4028:16966:4029:4315:4316:4332:51082:4175:46961:4354:42623:4088:4375:30234:8897:254:4399:3938:8553:16887:4070:4055:4160:4412:4129:4252:8398:4347:8121:3724:4618:3743:4635:4636:3852:4743:9055:3872:4748:4783:4768
5215	transporter activity	15 out of 74 genes, 20.3%	406 out of 7288 background genes, 5.6%	0.00163	ATP3:PHO88:VMA2:ITR1:QCR7:PMA1:ACB1:MIR1:ATP14:COX8:COX7:COX5A:POR1:VPH1:ATP15	5315:46961:62:8553:4129:46933:5324:8121:5365:8308:15114
Component
GOID	GO_term	Cluster frequency	Background frequency	P-value	Gene(s) annotated to the term	Directly Annotated GOID List
5737	cytoplasm	67 out of 74 genes, 90.5%	3694 out of 7288 background genes, 50.7%	2.25e-11	SSA1:CDC19:GCV3:ATP3:HSP26:PHO88:VMA2:PGI1:ILV6:YCP4:PGK1:PST2:MRH1:SED1:RTN1:QCR7:RPL12A:PRB1:PAB1:HSP12:PMA1:OLE1:ACB1:ERG25:RNR4:YHB1:PFK1:RPL8A:ERG11:YHR162W:URA2:TIF2:ILV3:MIR1:ECM17:HOM6:FBA1:YEF3:ATP14:COX8:IMD3:RPS1B:HSC82:PFK2:RPL20A:COX7:PBI2:COX5A:POR1:YDJ1:LEU4:RPP2A:ARG1:STI1:RPL3:VPH1:ALD4:GDH1:ALD6:SSE1:RPL5:RPL1A:FAS2:ATP15:TEF1:RPL11A:NCE102	5960:5945:5783:5948:9277:48471:5789:16281:42645:324:328:5750:31307:5751:329:5840:5842:5737:5843:276:5739:5756:5829:9337:5759:5792:5971:5794:45121:5886:220:221:5634:5740:5741:16020:16021:5832:5835:5853
44444	cytoplasmic part	58 out of 74 genes, 78.4%	2700 out of 7288 background genes, 37.0%	4.27e-11	SSA1:CDC19:GCV3:ATP3:PHO88:VMA2:PGI1:ILV6:YCP4:PGK1:PST2:MRH1:SED1:RTN1:QCR7:RPL12A:PRB1:PAB1:PMA1:OLE1:ERG25:RNR4:YHB1:PFK1:RPL8A:ERG11:YHR162W:URA2:TIF2:ILV3:MIR1:FBA1:YEF3:ATP14:COX8:RPS1B:HSC82:PFK2:RPL20A:COX7:PBI2:COX5A:POR1:YDJ1:LEU4:RPP2A:ARG1:RPL3:VPH1:ALD4:ALD6:RPL5:RPL1A:FAS2:ATP15:TEF1:RPL11A:NCE102	5960:5945:5783:5948:9277:48471:5789:16281:42645:324:328:5750:31307:5751:5840:329:5842:5737:5843:276:5739:5756:5829:5759:5792:5971:5794:45121:5886:220:221:5634:5740:5741:16020:16021:5832:5835:5853
5622	intracellular	73 out of 74 genes, 98.6%	5087 out of 7288 background genes, 69.8%	9.44e-09	SSA1:CDC19:GCV3:ATP3:HSP26:PHO88:VMA2:PGI1:ILV6:HIS4:YCP4:PGK1:PST2:MRH1:SED1:RTN1:QCR7:RPL12A:PRB1:PAB1:BMH1:HSP12:PMA1:OLE1:ACB1:ERG25:RNR4:YHB1:PFK1:RPL8A:SBP1:ERG11:YHR162W:URA2:TIF2:ILV3:MIR1:ECM17:HOM6:FBA1:YEF3:ATP14:COX8:IMD3:RPS1B:PRE8:HSC82:PFK2:RPL20A:COX7:DSK2:PBI2:COX5A:POR1:YDJ1:LEU4:RPP2A:ARG1:STI1:RPL3:VPH1:NOP58:ALD4:GDH1:ALD6:SSE1:RPL5:RPL1A:FAS2:ATP15:TEF1:RPL11A:NCE102	5960:5945:5783:31428:5948:9277:48471:5789:16281:5622:42645:5730:324:5732:328:5750:31307:5751:5840:329:5842:5737:5843:276:5739:5756:5829:9337:5759:5792:5971:5794:19773:45121:5886:220:221:5634:5740:5741:16020:16021:5832:5835:5853
5739	mitochondrion	34 out of 74 genes, 45.9%	1103 out of 7288 background genes, 15.1%	2.88e-08	GCV3:ATP3:PHO88:PGI1:ILV6:YCP4:PGK1:PST2:MRH1:SED1:RTN1:QCR7:PMA1:YHB1:PFK1:YHR162W:URA2:ILV3:MIR1:FBA1:ATP14:COX8:HSC82:PFK2:COX7:COX5A:POR1:LEU4:ALD4:ALD6:FAS2:ATP15:TEF1:NCE102	5960:5945:5783:9277:5948:5789:42645:5750:31307:5751:5840:5737:276:5739:5829:5756:5759:5794:45121:5886:5740:5741:16020:16021:5835:5853
44464	cell part	74 out of 74 genes, 100.0%	5495 out of 7288 background genes, 75.4%	8.85e-08	SSA1:CDC19:GCV3:ATP3:HSP26:PHO88:VMA2:PGI1:ILV6:HIS4:YCP4:PGK1:PST2:MRH1:SED1:RTN1:ITR1:QCR7:RPL12A:PRB1:PAB1:BMH1:HSP12:PMA1:OLE1:ACB1:ERG25:RNR4:YHB1:PFK1:RPL8A:SBP1:ERG11:YHR162W:URA2:TIF2:ILV3:MIR1:ECM17:HOM6:FBA1:YEF3:ATP14:COX8:IMD3:RPS1B:PRE8:HSC82:PFK2:RPL20A:COX7:DSK2:PBI2:COX5A:POR1:YDJ1:LEU4:RPP2A:ARG1:STI1:RPL3:VPH1:NOP58:ALD4:GDH1:ALD6:SSE1:RPL5:RPL1A:FAS2:ATP15:TEF1:RPL11A:NCE102	5960:5945:5783:31428:5948:9277:48471:5789:16281:5622:42645:5730:324:5732:328:5750:31307:5751:5840:329:5842:5737:5843:276:5739:5756:5829:9337:5759:5792:5971:5794:19773:45121:5886:220:221:5634:5740:5741:16020:16021:5832:5835:5853
44424	intracellular part	72 out of 74 genes, 97.3%	5052 out of 7288 background genes, 69.3%	9.75e-08	SSA1:CDC19:GCV3:ATP3:HSP26:PHO88:VMA2:PGI1:ILV6:YCP4:PGK1:PST2:MRH1:SED1:RTN1:QCR7:RPL12A:PRB1:PAB1:BMH1:HSP12:PMA1:OLE1:ACB1:ERG25:RNR4:YHB1:PFK1:RPL8A:SBP1:ERG11:YHR162W:URA2:TIF2:ILV3:MIR1:ECM17:HOM6:FBA1:YEF3:ATP14:COX8:IMD3:RPS1B:PRE8:HSC82:PFK2:RPL20A:COX7:DSK2:PBI2:COX5A:POR1:YDJ1:LEU4:RPP2A:ARG1:STI1:RPL3:VPH1:NOP58:ALD4:GDH1:ALD6:SSE1:RPL5:RPL1A:FAS2:ATP15:TEF1:RPL11A:NCE102	5960:5945:5783:31428:5948:9277:48471:5789:16281:42645:5730:324:5732:328:5750:31307:5751:5840:329:5842:5737:5843:276:5739:5756:5829:9337:5759:5792:5971:5794:19773:45121:5886:220:221:5634:5740:5741:16020:16021:5832:5835:5853
43229	intracellular organelle	64 out of 74 genes, 86.5%	4021 out of 7288 background genes, 55.2%	8.74e-07	SSA1:GCV3:ATP3:HSP26:PHO88:VMA2:PGI1:ILV6:YCP4:PGK1:PST2:MRH1:SED1:RTN1:QCR7:RPL12A:PRB1:PAB1:BMH1:HSP12:PMA1:OLE1:ACB1:ERG25:RNR4:YHB1:PFK1:RPL8A:SBP1:ERG11:YHR162W:URA2:TIF2:ILV3:MIR1:HOM6:FBA1:YEF3:ATP14:COX8:RPS1B:HSC82:PFK2:RPL20A:COX7:DSK2:PBI2:COX5A:POR1:LEU4:RPP2A:RPL3:VPH1:NOP58:ALD4:GDH1:ALD6:RPL5:RPL1A:FAS2:ATP15:TEF1:RPL11A:NCE102	5960:5945:5783:31428:5948:9277:5789:16281:42645:5730:324:5732:328:5750:31307:5751:5840:329:5842:5737:5843:276:5739:5829:5756:5759:5971:5794:45121:5886:220:221:5634:5740:5741:16020:16021:5832:5835:5853
43226	organelle	64 out of 74 genes, 86.5%	4022 out of 7288 background genes, 55.2%	8.86e-07	SSA1:GCV3:ATP3:HSP26:PHO88:VMA2:PGI1:ILV6:YCP4:PGK1:PST2:MRH1:SED1:RTN1:QCR7:RPL12A:PRB1:PAB1:BMH1:HSP12:PMA1:OLE1:ACB1:ERG25:RNR4:YHB1:PFK1:RPL8A:SBP1:ERG11:YHR162W:URA2:TIF2:ILV3:MIR1:HOM6:FBA1:YEF3:ATP14:COX8:RPS1B:HSC82:PFK2:RPL20A:COX7:DSK2:PBI2:COX5A:POR1:LEU4:RPP2A:RPL3:VPH1:NOP58:ALD4:GDH1:ALD6:RPL5:RPL1A:FAS2:ATP15:TEF1:RPL11A:NCE102	5960:5945:5783:31428:5948:9277:5789:16281:42645:5730:324:5732:328:5750:31307:5751:5840:329:5842:5737:5843:276:5739:5829:5756:5759:5971:5794:45121:5886:220:221:5634:5740:5741:16020:16021:5832:5835:5853
44445	cytosolic part	12 out of 74 genes, 16.2%	197 out of 7288 background genes, 2.7%	6.54e-05	SSA1:RPL12A:PFK1:RPL8A:RPS1B:PFK2:RPL20A:RPP2A:RPL3:RPL5:RPL1A:RPL11A	5945:9277:329:5842:5737:5843:5739:5634:5832
5842	cytosolic large ribosomal subunit (sensu Eukaryota)	8 out of 74 genes, 10.8%	97 out of 7288 background genes, 1.3%	0.00064	RPL12A:RPL8A:RPL20A:RPP2A:RPL3:RPL5:RPL1A:RPL11A	5842
44455	mitochondrial membrane part	8 out of 74 genes, 10.8%	98 out of 7288 background genes, 1.3%	0.00069	ATP3:QCR7:ATP14:COX8:COX7:COX5A:POR1:ATP15	5750:31307:5751:276:5739:5756:5741
5829	cytosol	19 out of 74 genes, 25.7%	617 out of 7288 background genes, 8.5%	0.00096	SSA1:CDC19:PGI1:RPL12A:YHB1:PFK1:RPL8A:FBA1:RPS1B:PFK2:RPL20A:YDJ1:RPP2A:ARG1:RPL3:ALD6:RPL5:RPL1A:RPL11A	5945:9277:48471:329:5842:5737:5843:5739:5829:5759:5792:5634:5832
43234	protein complex	29 out of 74 genes, 39.2%	1291 out of 7288 background genes, 17.7%	0.00118	SSA1:GCV3:ATP3:VMA2:ILV6:QCR7:RPL12A:RNR4:PFK1:RPL8A:TIF2:ECM17:ATP14:COX8:RPS1B:PRE8:PFK2:RPL20A:COX7:COX5A:RPP2A:RPL3:VPH1:RPL5:RPL1A:FAS2:ATP15:TEF1:RPL11A	5960:5945:5948:9277:16281:42645:5750:5751:5840:329:5842:5737:5843:276:5739:5756:9337:5971:19773:220:221:5634:5832:5835:5853
5840	ribosome	14 out of 74 genes, 18.9%	357 out of 7288 background genes, 4.9%	0.00131	SED1:RPL12A:PAB1:RPL8A:TIF2:YEF3:RPS1B:RPL20A:RPP2A:RPL3:RPL5:RPL1A:TEF1:RPL11A	9277:16281:5840:5737:5842:5843:5739:5634:5853
32991	macromolecular complex	33 out of 74 genes, 44.6%	1626 out of 7288 background genes, 22.3%	0.00186	SSA1:GCV3:ATP3:VMA2:ILV6:SED1:QCR7:RPL12A:PAB1:RNR4:PFK1:RPL8A:TIF2:ECM17:YEF3:ATP14:COX8:RPS1B:PRE8:PFK2:RPL20A:COX7:COX5A:RPP2A:RPL3:VPH1:NOP58:RPL5:RPL1A:FAS2:ATP15:TEF1:RPL11A	5960:5945:31428:5948:9277:16281:42645:5732:5750:5751:5840:329:5842:5737:5843:276:5739:5756:9337:5971:19773:220:221:5634:5832:5835:5853
16469	proton-transporting two-sector ATPase complex	5 out of 74 genes, 6.8%	35 out of 7288 background genes, 0.5%	0.00286	ATP3:VMA2:ATP14:VPH1:ATP15	329:5737:276:5739:5756:220:221
5830	cytosolic ribosome (sensu Eukaryota)	9 out of 74 genes, 12.2%	176 out of 7288 background genes, 2.4%	0.00776	RPL12A:RPL8A:RPS1B:RPL20A:RPP2A:RPL3:RPL5:RPL1A:RPL11A	5842:5843
Bi-Cluster 12	score =453
				Mean pattern, and conditions
YGR037C	ACB1	YGR037C
YGR204W	ADE3	YGR204W
YPL061W	ALD6	YPL061W
YOR374W	ALD4	YOR374W
YOL058W	ARG1	YOL058W
YHR018C	ARG4	YHR018C
YLR295C	ATP14	YLR295C
YPL271W	ATP15	YPL271W
YJR121W	ATP2	YJR121W
YBR039W	ATP3	YBR039W
YER177W	BMH1	YER177W
YBL045C	COR1	YBL045C
YNL052W	COX5A	YNL052W
YMR256C	COX7	YMR256C
YLR395C	COX8	YLR395C
YMR276W	DSK2	YMR276W
YHR007C	ERG11	YHR007C
YGR060W	ERG25	YGR060W
YML012W	ERV25	YML012W
YPL231W	FAS2	YPL231W
YKL060C	FBA1	YKL060C
YPL262W	FUM1	YPL262W
YAL044C	GCV3	YAL044C
YOR375C	GDH1	YOR375C
YJR139C	HOM6	YJR139C
YMR186W	HSC82	YMR186W
YFL014W	HSP12	YFL014W
YGL253W	HXK2	YGL253W
YNL037C	IDH1	YNL037C
YOR136W	IDH2	YOR136W
YCL009C	ILV6	YCL009C
YDR497C	ITR1	YDR497C
YIL125W	KGD1	YIL125W
YNL071W	LAT1	YNL071W
YNL104C	LEU4	YNL104C
YKL085W	MDH1	YKL085W
YER091C	MET6	YER091C
YJR077C	MIR1	YJR077C
YML009C	MRPL39	YML009C
YPR149W	NCE102	YPR149W
YML120C	NDI1	YML120C
YGL055W	OLE1	YGL055W
YJR073C	OPI3	YJR073C
YNL015W	PBI2	YNL015W
YER178W	PDA1	YER178W
YMR205C	PFK2	YMR205C
YBR196C	PGI1	YBR196C
YCR012W	PGK1	YCR012W
YBR106W	PHO88	YBR106W
YGL008C	PMA1	YGL008C
YNL055C	POR1	YNL055C
YOL038W	PRE6	YOL038W
YGL062W	PYC1	YGL062W
YAL038W	CDC19	YAL038W
YDR529C	QCR7	YDR529C
YEL024W	RIP1	YEL024W
YPR102C	RPL11A	YPR102C
YEL054C	RPL12A	YEL054C
YPL220W	RPL1A	YPL220W
YMR242C	RPL20A	YMR242C
YPL131W	RPL5	YPL131W
YHL033C	RPL8A	YHL033C
YOL039W	RPP2A	YOL039W
YER043C	SAH1	YER043C
YDR502C	SAM2	YDR502C
YHL034C	SBP1	YHL034C
YDR178W	SDH4	YDR178W
YLR378C	SEC61	YLR378C
YDR077W	SED1	YDR077W
YAL005C	SSA1	YAL005C
YOR027W	STI1	YOR027W
YPR080W	TEF1	YPR080W
YJL138C	TIF2	YJL138C
YGR209C	TRX2	YGR209C
YDR177W	UBC1	YDR177W
YJL130C	URA2	YJL130C
YBR127C	VMA2	YBR127C
YOR270C	VPH1	YOR270C
YBR262C	FMP51	YBR262C
YCR004C	YCP4	YCR004C
YDR032C	PST2	YDR032C
YDR233C	RTN1	YDR233C
YLR249W	YEF3	YLR249W
YGR243W	FMP43	YGR243W
YGR234W	YHB1	YGR234W
YHR162W	non	YHR162W
YKL192C	ACP1	YKL192C
YMR002W	MIC17	YMR002W
YMR145C	NDE1	YMR145C
YKL067W	YNK1	YKL067W
YOR247W	SRL1	YOR247W
YOR285W	non	YOR285W
GO Enrichments
Process
GOID	GO_term	Cluster frequency	Background frequency	P-value	Gene(s) annotated to the term	Directly Annotated GOID List
19752	carboxylic acid metabolic process	29 out of 92 genes, 31.5%	308 out of 7288 background genes, 4.2%	1.13e-15	CDC19:GCV3:PGI1:ILV6:PGK1:SAM2:SAH1:MET6:PDA1:OLE1:PYC1:ACB1:ADE3:ARG4:KGD1:URA2:HOM6:FBA1:MDH1:ACP1:IDH1:LAT1:LEU4:ARG1:IDH2:GDH1:ALD6:FAS2:FUM1	53:9098:19856:6207:18065:9113:6730:6537:6555:9082:723:9086:6102:6103:6106:6108:16259:6090:1:19413:6094:15909:42493:6096:6541:6631:6526:6098:6099:6633:6740:6546:6636:9090:6760:6566:52
6082	organic acid metabolic process	29 out of 92 genes, 31.5%	308 out of 7288 background genes, 4.2%	1.13e-15	CDC19:GCV3:PGI1:ILV6:PGK1:SAM2:SAH1:MET6:PDA1:OLE1:PYC1:ACB1:ADE3:ARG4:KGD1:URA2:HOM6:FBA1:MDH1:ACP1:IDH1:LAT1:LEU4:ARG1:IDH2:GDH1:ALD6:FAS2:FUM1	53:9098:19856:6207:18065:9113:6730:6537:6555:9082:9086:723:6102:6103:6106:6108:16259:6090:19413:1:6094:42493:15909:6541:6096:6526:6631:6098:6633:6099:6740:6546:9090:6636:52:6566:6760
6091	generation of precursor metabolites and energy	27 out of 92 genes, 29.3%	336 out of 7288 background genes, 4.6%	1.22e-12	CDC19:COR1:ATP3:PGI1:PGK1:SDH4:QCR7:RIP1:BMH1:PYC1:HXK2:KGD1:ATP2:FBA1:MDH1:ATP14:COX8:NDI1:NDE1:PFK2:COX7:IDH1:COX5A:POR1:IDH2:FUM1:ATP15	19655:15986:6006:7005:17062:32445:77:6116:43065:1300:1302:9060:1321:7265:6537:30437:6102:6013:6103:6120:6121:6106:6122:6123:6108:5977:46015:7124:51436:6090:46323:6094:6096:1402:6098:6811:6099:6740:8361:6000
6119	oxidative phosphorylation	11 out of 92 genes, 12.0%	46 out of 7288 background genes, 0.6%	2.97e-09	ATP3:SDH4:QCR7:RIP1:ATP2:ATP14:COX8:NDI1:COX7:COX5A:ATP15	15986:17062:6116:43065:1300:9060:1321:6120:6121:6122:6123:6099
44237	cellular metabolic process	74 out of 92 genes, 80.4%	3429 out of 7288 background genes, 47.0%	1.63e-08	SSA1:CDC19:GCV3:COR1:ATP3:PGI1:ILV6:PGK1:UBC1:SDH4:SAM2:QCR7:RIP1:RPL12A:SAH1:MET6:BMH1:PDA1:HSP12:OLE1:PYC1:HXK2:ACB1:ERG25:ADE3:TRX2:RPL8A:SBP1:ERG11:ARG4:KGD1:URA2:TIF2:OPI3:ATP2:HOM6:FBA1:YNK1:MDH1:ACP1:YEF3:ATP14:COX8:MRPL39:NDI1:NDE1:HSC82:PFK2:RPL20A:COX7:DSK2:PBI2:IDH1:COX5A:POR1:LAT1:LEU4:PRE6:RPP2A:ARG1:STI1:IDH2:SRL1:VPH1:ALD4:GDH1:ALD6:RPL5:RPL1A:FAS2:FUM1:ATP15:TEF1:RPL11A	6656:19655:15986:9098:6006:6696:77:6116:43065:103:18065:43248:6511:6261:6513:6409:9060:1321:6446:30503:6730:6626:30433:6555:30437:723:16070:6013:6950:6120:6121:6122:7103:6123:5977:46015:7035:6888:16259:6412:6413:6414:6090:6164:19413:6165:1:6094:42493:11:6096:9142:6526:6631:1402:6098:6811:6633:6099:6740:6457:6458:6636:42026:52:6566:53:42787:7005:17062:32445:6890:19856:6207:6897:6139:6067:9113:1300…
6732	coenzyme metabolic process	15 out of 92 genes, 16.3%	135 out of 7288 background genes, 1.9%	4.2e-08	ATP3:PGI1:SDH4:PYC1:ADE3:KGD1:ATP2:MDH1:ATP14:NDI1:NDE1:IDH1:IDH2:FUM1:ATP15	19655:15986:6116:43065:1321:6120:6121:6094:6096:6098:6099:6740:9113:1300:6537:6102:6103:6106:6108:6760
8152	metabolic process	74 out of 92 genes, 80.4%	3509 out of 7288 background genes, 48.1%	6.37e-08	SSA1:CDC19:GCV3:COR1:ATP3:PGI1:ILV6:PGK1:UBC1:SDH4:SAM2:QCR7:RIP1:RPL12A:SAH1:MET6:BMH1:PDA1:HSP12:OLE1:PYC1:HXK2:ACB1:ERG25:ADE3:TRX2:RPL8A:SBP1:ERG11:ARG4:KGD1:URA2:TIF2:OPI3:ATP2:HOM6:FBA1:YNK1:MDH1:ACP1:YEF3:ATP14:COX8:MRPL39:NDI1:NDE1:HSC82:PFK2:RPL20A:COX7:DSK2:PBI2:IDH1:COX5A:POR1:LAT1:LEU4:PRE6:RPP2A:ARG1:STI1:IDH2:SRL1:VPH1:ALD4:GDH1:ALD6:RPL5:RPL1A:FAS2:FUM1:ATP15:TEF1:RPL11A	6656:19655:15986:9098:6006:6696:77:6116:43065:103:18065:43248:6511:6261:6513:6409:9060:1321:6446:30503:6730:6626:30433:6555:30437:723:16070:6013:6950:6120:6121:6122:7103:6123:5977:46015:7035:6888:16259:6412:6413:6414:6090:6164:19413:6165:1:6094:42493:11:6096:9142:6526:6631:1402:6098:6811:6633:6099:6740:6457:6458:6636:42026:52:6566:53:42787:7005:17062:6890:32445:19856:6207:6897:6139:6067:9113:1300…
51186	cofactor metabolic process	15 out of 92 genes, 16.3%	168 out of 7288 background genes, 2.3%	9.42e-07	ATP3:PGI1:SDH4:PYC1:ADE3:KGD1:ATP2:MDH1:ATP14:NDI1:NDE1:IDH1:IDH2:FUM1:ATP15	19655:15986:6116:43065:1321:6120:6121:6094:6096:6098:6099:6740:9113:1300:6537:6102:6103:6106:6108:6760
32787	monocarboxylic acid metabolic process	13 out of 92 genes, 14.1%	121 out of 7288 background genes, 1.7%	1.27e-06	CDC19:PGI1:PGK1:PDA1:OLE1:PYC1:ACB1:ADE3:FBA1:ACP1:LAT1:ALD6:FAS2	18065:6090:19413:1:6094:6096:6631:6098:6633:6740:6636:9113:15909:6760
15980	energy derivation by oxidation of organic compounds	19 out of 92 genes, 20.7%	298 out of 7288 background genes, 4.1%	1.63e-06	CDC19:COR1:PGI1:PGK1:SDH4:QCR7:RIP1:BMH1:PYC1:HXK2:KGD1:FBA1:MDH1:NDE1:PFK2:IDH1:POR1:IDH2:FUM1	19655:6006:77:6116:9060:30437:6013:6121:6122:5977:46015:6090:6094:6096:1402:6098:6811:6099:6740:7005:17062:32445:1300:1302:7265:6537:6102:6103:6106:6108:7124:51436:46323:8361:6000
46356	acetyl-CoA catabolic process	6 out of 92 genes, 6.5%	15 out of 7288 background genes, 0.2%	7.13e-06	SDH4:KGD1:MDH1:IDH1:IDH2:FUM1	6121:6099:6537:6102:6103:6106:6108
6099	tricarboxylic acid cycle	6 out of 92 genes, 6.5%	15 out of 7288 background genes, 0.2%	7.13e-06	SDH4:KGD1:MDH1:IDH1:IDH2:FUM1	6121:6099:6537:6102:6103:6106:6108
42773	ATP synthesis coupled electron transport	7 out of 92 genes, 7.6%	25 out of 7288 background genes, 0.3%	7.37e-06	SDH4:QCR7:RIP1:COX8:NDI1:COX7:COX5A	6116:43065:9060:6120:6121:6122:6123:6099:17062:1300
42775	organelle ATP synthesis coupled electron transport	7 out of 92 genes, 7.6%	25 out of 7288 background genes, 0.3%	7.37e-06	SDH4:QCR7:RIP1:COX8:NDI1:COX7:COX5A	6116:43065:9060:6120:6121:6122:6123:6099:17062:1300
9058	biosynthetic process	38 out of 92 genes, 41.3%	1220 out of 7288 background genes, 16.7%	8.08e-06	SSA1:ATP3:PGI1:ILV6:PGK1:RPL12A:MET6:PYC1:ERG25:ADE3:RPL8A:ERG11:ARG4:URA2:TIF2:OPI3:ATP2:HOM6:FBA1:YNK1:ACP1:YEF3:ATP14:MRPL39:RPL20A:IDH1:LEU4:RPP2A:ARG1:IDH2:GDH1:ALD6:RPL5:RPL1A:FAS2:ATP15:TEF1:RPL11A	6656:15986:9098:6696:18065:6409:1321:6446:6626:6555:16070:6950:6412:6413:6414:6164:19413:6165:6094:42493:6096:9142:6526:6098:6099:6633:6740:6457:42026:52:6566:53:19856:6207:9113:9117:6537:9082:27:60:9086:6102:42254:6541:6259:6616:9090:6760
9060	aerobic respiration	10 out of 92 genes, 10.9%	80 out of 7288 background genes, 1.1%	2.26e-05	COR1:SDH4:QCR7:RIP1:KGD1:MDH1:IDH1:POR1:IDH2:FUM1	9060:6121:6122:6811:6099:7005:17062:6537:6102:6103:6106:6108
45333	cellular respiration	10 out of 92 genes, 10.9%	86 out of 7288 background genes, 1.2%	4.58e-05	COR1:SDH4:QCR7:RIP1:KGD1:MDH1:IDH1:POR1:IDH2:FUM1	9060:6121:6122:6811:6099:7005:17062:6537:6102:6103:6106:6108
6084	acetyl-CoA metabolic process	6 out of 92 genes, 6.5%	20 out of 7288 background genes, 0.3%	5.25e-05	SDH4:KGD1:MDH1:IDH1:IDH2:FUM1	6121:6099:6537:6102:6103:6106:6108
9109	coenzyme catabolic process	6 out of 92 genes, 6.5%	20 out of 7288 background genes, 0.3%	5.25e-05	SDH4:KGD1:MDH1:IDH1:IDH2:FUM1	6121:6099:6537:6102:6103:6106:6108
6118	electron transport	7 out of 92 genes, 7.6%	33 out of 7288 background genes, 0.5%	6.03e-05	SDH4:QCR7:RIP1:COX8:NDI1:COX7:COX5A	6116:43065:9060:6120:6121:6122:6123:6099:17062:1300
44249	cellular biosynthetic process	35 out of 92 genes, 38.0%	1143 out of 7288 background genes, 15.7%	6.33e-05	SSA1:ATP3:PGI1:ILV6:PGK1:RPL12A:MET6:PYC1:ADE3:RPL8A:ARG4:URA2:TIF2:ATP2:HOM6:FBA1:YNK1:ACP1:YEF3:ATP14:MRPL39:RPL20A:IDH1:LEU4:RPP2A:ARG1:IDH2:GDH1:ALD6:RPL5:RPL1A:FAS2:ATP15:TEF1:RPL11A	15986:9098:18065:6409:1321:6446:6626:6555:16070:6950:6412:6413:6414:6164:19413:6165:6094:42493:6096:9142:6526:6098:6099:6633:6740:6457:42026:52:6566:53:19856:6207:9113:9117:6537:9082:27:60:9086:6102:42254:6541:6259:6616:9090:6760
51187	cofactor catabolic process	6 out of 92 genes, 6.5%	21 out of 7288 background genes, 0.3%	7.27e-05	SDH4:KGD1:MDH1:IDH1:IDH2:FUM1	6121:6099:6537:6102:6103:6106:6108
6090	pyruvate metabolic process	7 out of 92 genes, 7.6%	36 out of 7288 background genes, 0.5%	0.00011	CDC19:PGI1:PGK1:PDA1:PYC1:FBA1:LAT1	6090:6094:6096:6098:6740
16310	phosphorylation	12 out of 92 genes, 13.0%	148 out of 7288 background genes, 2.0%	0.00012	ATP3:SDH4:QCR7:RIP1:ATP2:YNK1:ATP14:COX8:NDI1:COX7:COX5A:ATP15	15986:6116:43065:9060:1321:16070:6120:6121:6122:6123:6164:6165:9142:6099:17062:1300:9117:6259
44262	cellular carbohydrate metabolic process	14 out of 92 genes, 15.2%	209 out of 7288 background genes, 2.9%	0.00013	CDC19:PGI1:PGK1:SDH4:BMH1:PYC1:HXK2:KGD1:FBA1:MDH1:PFK2:IDH1:IDH2:FUM1	6006:77:30437:6013:6121:5977:46015:6090:6094:6096:1402:6098:6099:6740:32445:1302:7265:6537:6102:6103:6106:6108:7124:51436:46323:8361:6000
6096	glycolysis	6 out of 92 genes, 6.5%	24 out of 7288 background genes, 0.3%	0.00017	CDC19:PGI1:PGK1:HXK2:FBA1:PFK2	6006:6013:46015:6090:6094:6096:6098:32445:1302:46323:8361:6000
6520	amino acid metabolic process	13 out of 92 genes, 14.1%	185 out of 7288 background genes, 2.5%	0.0002	GCV3:ILV6:SAM2:SAH1:MET6:ARG4:URA2:HOM6:IDH1:LEU4:ARG1:IDH2:GDH1	9098:6730:6555:723:16259:42493:6526:6099:52:6566:53:19856:6207:6537:9082:9086:6102:6541:6546:9090
5975	carbohydrate metabolic process	14 out of 92 genes, 15.2%	229 out of 7288 background genes, 3.1%	0.00039	CDC19:PGI1:PGK1:SDH4:BMH1:PYC1:HXK2:KGD1:FBA1:MDH1:PFK2:IDH1:IDH2:FUM1	6006:77:30437:6013:6121:5977:46015:6090:6094:6096:1402:6098:6099:6740:32445:1302:7265:6537:6102:6103:6106:6108:7124:51436:46323:8361:6000
9987	cellular process	80 out of 92 genes, 87.0%	4701 out of 7288 background genes, 64.5%	0.00045	SSA1:CDC19:GCV3:COR1:ATP3:PHO88:VMA2:PGI1:ILV6:PGK1:SED1:UBC1:SDH4:SAM2:QCR7:RIP1:RPL12A:SAH1:MET6:BMH1:PDA1:HSP12:OLE1:PYC1:HXK2:ACB1:ERG25:ADE3:TRX2:RPL8A:SBP1:ERG11:ARG4:KGD1:URA2:TIF2:OPI3:ATP2:HOM6:FBA1:YNK1:MDH1:ACP1:YEF3:ATP14:SEC61:COX8:MRPL39:ERV25:NDI1:NDE1:HSC82:PFK2:RPL20A:COX7:DSK2:PBI2:IDH1:COX5A:POR1:LAT1:LEU4:PRE6:RPP2A:ARG1:STI1:IDH2:SRL1:VPH1:ALD4:GDH1:ALD6:RPL5:RPL1A:FAS2:FUM1:…	6656:19655:15986:9098:6006:6696:77:6874:6116:43065:103:18065:43248:6511:6261:6513:6409:9060:1321:6446:30503:6730:6626:30433:6555:30437:723:16070:6013:6950:6120:6121:6122:7103:6123:5977:46015:7035:6888:16259:6412:6413:6414:6090:6164:19413:6165:1:2:31204:6094:42493:11:6096:9142:6526:6631:1402:6098:6811:6633:6099:6740:6457:6458:6636:42026:52:6566:6817:53:42787:7005:17062:6890:32445:19856:6207:45047:…
6793	phosphorus metabolic process	13 out of 92 genes, 14.1%	199 out of 7288 background genes, 2.7%	0.00048	ATP3:SDH4:QCR7:RIP1:ATP2:YNK1:ATP14:COX8:NDI1:COX7:COX5A:VPH1:ATP15	15986:6116:43065:9060:1321:16070:6120:6121:6122:6123:7035:6164:6165:9142:6099:17062:1300:9117:6461:6797:6259
6796	phosphate metabolic process	13 out of 92 genes, 14.1%	199 out of 7288 background genes, 2.7%	0.00048	ATP3:SDH4:QCR7:RIP1:ATP2:YNK1:ATP14:COX8:NDI1:COX7:COX5A:VPH1:ATP15	15986:6116:43065:9060:1321:16070:6120:6121:6122:6123:7035:6164:6165:9142:6099:17062:1300:9117:6461:6797:6259
6519	amino acid and derivative metabolic process	13 out of 92 genes, 14.1%	200 out of 7288 background genes, 2.7%	0.00051	GCV3:ILV6:SAM2:SAH1:MET6:ARG4:URA2:HOM6:IDH1:LEU4:ARG1:IDH2:GDH1	9098:6730:6555:723:16259:42493:6526:6099:52:6566:53:19856:6207:6537:9082:9086:6102:6541:6546:9090
44238	primary metabolic process	63 out of 92 genes, 68.5%	3207 out of 7288 background genes, 44.0%	0.00073	SSA1:CDC19:GCV3:ATP3:PGI1:ILV6:PGK1:UBC1:SDH4:SAM2:QCR7:RPL12A:SAH1:MET6:BMH1:OLE1:PYC1:HXK2:ACB1:ERG25:ADE3:TRX2:RPL8A:SBP1:ERG11:ARG4:KGD1:URA2:TIF2:OPI3:ATP2:HOM6:FBA1:YNK1:MDH1:ACP1:YEF3:ATP14:MRPL39:NDI1:NDE1:HSC82:PFK2:RPL20A:DSK2:PBI2:IDH1:LEU4:PRE6:RPP2A:ARG1:STI1:IDH2:SRL1:VPH1:GDH1:RPL5:RPL1A:FAS2:FUM1:ATP15:TEF1:RPL11A	6656:19655:15986:9098:6006:6696:77:6116:43065:103:18065:43248:6511:6261:6513:6409:9060:1321:6446:30503:6730:6626:30433:6555:30437:723:16070:6013:6950:6120:6121:6122:7103:5977:46015:7035:6888:16259:6412:6413:6414:6090:6164:6165:1:6094:42493:11:6096:9142:6526:6631:1402:6098:6633:6099:6740:6457:6458:6636:42026:52:6566:53:42787:17062:6890:32445:19856:6207:6897:6139:9113:1300:1302:9117:6461:30162:7265…
6100	tricarboxylic acid cycle intermediate metabolic process	5 out of 92 genes, 5.4%	19 out of 7288 background genes, 0.3%	0.00132	KGD1:MDH1:IDH1:IDH2:FUM1	6099:6537:6102:6103:6106:6108
6007	glucose catabolic process	6 out of 92 genes, 6.5%	34 out of 7288 background genes, 0.5%	0.00158	CDC19:PGI1:PGK1:HXK2:FBA1:PFK2	6006:6013:46015:6090:6094:6096:6098:32445:1302:46323:8361:6000
9308	amine metabolic process	13 out of 92 genes, 14.1%	223 out of 7288 background genes, 3.1%	0.00173	GCV3:ILV6:SAM2:SAH1:MET6:ARG4:URA2:HOM6:IDH1:LEU4:ARG1:IDH2:GDH1	9098:6730:6555:723:16259:42493:6526:6099:52:6566:53:19856:6207:6537:9082:9086:6102:6541:6546:9090
8652	amino acid biosynthetic process	9 out of 92 genes, 9.8%	103 out of 7288 background genes, 1.4%	0.00236	ILV6:MET6:ARG4:HOM6:IDH1:LEU4:ARG1:IDH2:GDH1	9098:6555:42493:6526:6099:52:6566:53:6537:9082:9086:6102:9090
6066	alcohol metabolic process	11 out of 92 genes, 12.0%	163 out of 7288 background genes, 2.2%	0.00255	CDC19:PGI1:PGK1:PYC1:HXK2:ERG25:ERG11:FBA1:NDE1:PFK2:ALD4	19655:6006:6696:6116:6013:46015:6090:6094:6096:6098:6740:32445:6067:1300:1302:46323:8361:6000
19320	hexose catabolic process	6 out of 92 genes, 6.5%	37 out of 7288 background genes, 0.5%	0.00265	CDC19:PGI1:PGK1:HXK2:FBA1:PFK2	6006:6013:46015:6090:6094:6096:6098:32445:1302:46323:8361:6000
9117	nucleotide metabolic process	9 out of 92 genes, 9.8%	109 out of 7288 background genes, 1.5%	0.00377	ATP3:PGI1:PYC1:ATP2:YNK1:ATP14:NDI1:NDE1:ATP15	19655:15986:6116:43065:1321:16070:6120:6164:6165:6094:6096:9142:6098:6740:1300:9117:6259
44271	nitrogen compound biosynthetic process	9 out of 92 genes, 9.8%	111 out of 7288 background genes, 1.5%	0.00438	ILV6:MET6:ARG4:HOM6:IDH1:LEU4:ARG1:IDH2:GDH1	9098:6555:42493:6526:6099:52:6566:53:6537:9082:9086:6102:9090
9309	amine biosynthetic process	9 out of 92 genes, 9.8%	111 out of 7288 background genes, 1.5%	0.00438	ILV6:MET6:ARG4:HOM6:IDH1:LEU4:ARG1:IDH2:GDH1	9098:6555:42493:6526:6099:52:6566:53:6537:9082:9086:6102:9090
15992	proton transport	5 out of 92 genes, 5.4%	24 out of 7288 background genes, 0.3%	0.00459	ATP3:PMA1:ATP2:ATP14:ATP15	15986:1321:15992:6885
6818	hydrogen transport	5 out of 92 genes, 5.4%	24 out of 7288 background genes, 0.3%	0.00459	ATP3:PMA1:ATP2:ATP14:ATP15	15986:1321:15992:6885
6807	nitrogen compound metabolic process	13 out of 92 genes, 14.1%	244 out of 7288 background genes, 3.3%	0.00464	GCV3:ILV6:SAM2:SAH1:MET6:ARG4:URA2:HOM6:IDH1:LEU4:ARG1:IDH2:GDH1	9098:6730:6555:723:16259:42493:6526:6099:52:6566:53:19856:6207:6537:9082:9086:6102:6541:6546:9090
46365	monosaccharide catabolic process	6 out of 92 genes, 6.5%	42 out of 7288 background genes, 0.6%	0.00568	CDC19:PGI1:PGK1:HXK2:FBA1:PFK2	6006:6013:46015:6090:6094:6096:6098:32445:1302:46323:8361:6000
6006	glucose metabolic process	7 out of 92 genes, 7.6%	64 out of 7288 background genes, 0.9%	0.00638	CDC19:PGI1:PGK1:PYC1:HXK2:FBA1:PFK2	6006:6013:46015:6090:6094:6096:6098:6740:32445:1302:46323:8361:6000
9064	glutamine family amino acid metabolic process	6 out of 92 genes, 6.5%	43 out of 7288 background genes, 0.6%	0.00654	ARG4:URA2:IDH1:ARG1:IDH2:GDH1	6526:6099:52:53:19856:6207:6537:6102:6541
9084	glutamine family amino acid biosynthetic process	5 out of 92 genes, 5.4%	27 out of 7288 background genes, 0.4%	0.00847	ARG4:IDH1:ARG1:IDH2:GDH1	6526:6099:52:53:6537:6102
9142	nucleoside triphosphate biosynthetic process	5 out of 92 genes, 5.4%	27 out of 7288 background genes, 0.4%	0.00847	ATP3:ATP2:YNK1:ATP14:ATP15	15986:1321:16070:6164:6165:9142:9117:6259
46164	alcohol catabolic process	6 out of 92 genes, 6.5%	45 out of 7288 background genes, 0.6%	0.00856	CDC19:PGI1:PGK1:HXK2:FBA1:PFK2	6006:6013:46015:6090:6094:6096:6098:32445:1302:46323:8361:6000
Function
GOID	GO_term	Cluster frequency	Background frequency	P-value	Gene(s) annotated to the term	Directly Annotated GOID List
16491	oxidoreductase activity	27 out of 92 genes, 29.3%	265 out of 7288 background genes, 3.6%	1.12e-15	GCV3:COR1:YCP4:SDH4:QCR7:RIP1:PDA1:OLE1:ERG25:ADE3:TRX2:YHB1:ERG11:KGD1:HOM6:MDH1:COX8:NDI1:NDE1:COX7:IDH1:COX5A:IDH2:ALD4:GDH1:ALD6:FAS2	4028:16966:4029:4315:4129:4412:4316:8398:4329:4354:8121:4375:30060:4449:8137:4477:8897:254:4591:9055:4488:4739:3954:8177:30508:4768
15078	hydrogen ion transporter activity	13 out of 92 genes, 14.1%	54 out of 7288 background genes, 0.7%	1.12e-11	COR1:ATP3:VMA2:QCR7:RIP1:PMA1:ATP2:ATP14:COX8:COX7:COX5A:VPH1:ATP15	8553:4129:46933:46961:8121
15077	monovalent inorganic cation transporter activity	13 out of 92 genes, 14.1%	59 out of 7288 background genes, 0.8%	3.92e-11	COR1:ATP3:VMA2:QCR7:RIP1:PMA1:ATP2:ATP14:COX8:COX7:COX5A:VPH1:ATP15	8553:4129:46933:46961:8121
15075	ion transporter activity	16 out of 92 genes, 17.4%	149 out of 7288 background genes, 2.0%	6.21e-09	COR1:ATP3:PHO88:VMA2:QCR7:RIP1:PMA1:MIR1:ATP2:ATP14:COX8:COX7:COX5A:POR1:VPH1:ATP15	8553:4129:46933:5315:46961:8121:8308:15114
3824	catalytic activity	54 out of 92 genes, 58.7%	1988 out of 7288 background genes, 27.3%	3.52e-08	SSA1:CDC19:GCV3:COR1:VMA2:PGI1:ILV6:YCP4:PGK1:UBC1:SDH4:SAM2:QCR7:RIP1:SAH1:MET6:PDA1:PMA1:OLE1:PYC1:HXK2:ERG25:ADE3:TRX2:YHB1:ERG11:ARG4:KGD1:URA2:TIF2:OPI3:HOM6:FBA1:YNK1:MDH1:COX8:NDI1:NDE1:HSC82:PFK2:COX7:IDH1:COX5A:LAT1:LEU4:PRE6:ARG1:IDH2:VPH1:ALD4:GDH1:ALD6:FAS2:FUM1	3984:4028:16966:4029:4315:4316:4332:51082:4333:773:4175:46961:4354:42623:4088:4550:4375:4449:8137:30234:4396:4736:8897:4591:254:4842:4488:4739:3954:4013:30508:8177:8553:16887:4070:4055:4129:4412:4056:8398:4329:8121:4347:3724:30060:4618:3743:4742:3852:4743:4477:4478:9055:3871:3872:4768
8324	cation transporter activity	13 out of 92 genes, 14.1%	128 out of 7288 background genes, 1.8%	1.01e-06	COR1:ATP3:VMA2:QCR7:RIP1:PMA1:ATP2:ATP14:COX8:COX7:COX5A:VPH1:ATP15	46961:8553:4129:46933:8121
5215	transporter activity	20 out of 92 genes, 21.7%	406 out of 7288 background genes, 5.6%	1.89e-05	COR1:ATP3:PHO88:VMA2:ITR1:QCR7:RIP1:PMA1:ACB1:MIR1:ATP2:ACP1:ATP14:SEC61:COX8:COX7:COX5A:POR1:VPH1:ATP15	8565:5315:46961:62:8553:4129:46933:5324:8121:5365:8308:15114:36
46933	hydrogen ion transporting ATP synthase activity, rotational mechanism	4 out of 92 genes, 4.3%	15 out of 7288 background genes, 0.2%	0.00525	ATP3:ATP2:ATP14:ATP15	46933
Component
GOID	GO_term	Cluster frequency	Background frequency	P-value	Gene(s) annotated to the term	Directly Annotated GOID List
5739	mitochondrion	54 out of 92 genes, 58.7%	1103 out of 7288 background genes, 15.1%	7.2e-20	GCV3:COR1:ATP3:PHO88:PGI1:FMP51:ILV6:YCP4:PGK1:PST2:SED1:SDH4:RTN1:QCR7:RIP1:PDA1:PMA1:HXK2:YHB1:FMP43:YHR162W:KGD1:URA2:OPI3:MIR1:ATP2:FBA1:YNK1:MDH1:ACP1:ATP14:COX8:MRPL39:NDI1:MIC17:NDE1:HSC82:PFK2:COX7:IDH1:COX5A:POR1:LAT1:LEU4:PRE6:IDH2:YOR285W:ALD4:ALD6:FAS2:FUM1:ATP15:TEF1:NCE102	9353:5749:5758:5960:5945:5759:5783:5794:9277:5948:19773:45121:5886:5967:5789:42645:5625:5634:5740:5741:16020:16021:5750:31307:5751:5840:5737:5835:5762:5754:276:5739:5853:5829:5756
44444	cytoplasmic part	78 out of 92 genes, 84.8%	2700 out of 7288 background genes, 37.0%	3.99e-19	SSA1:CDC19:GCV3:COR1:ATP3:PHO88:VMA2:PGI1:FMP51:ILV6:YCP4:PGK1:PST2:SED1:SDH4:RTN1:QCR7:RIP1:RPL12A:PDA1:PMA1:OLE1:PYC1:HXK2:ERG25:TRX2:YHB1:FMP43:RPL8A:ERG11:ARG4:YHR162W:KGD1:URA2:TIF2:OPI3:MIR1:ATP2:FBA1:YNK1:MDH1:ACP1:YEF3:ATP14:SEC61:COX8:MRPL39:ERV25:NDI1:MIC17:NDE1:HSC82:PFK2:RPL20A:COX7:PBI2:IDH1:COX5A:POR1:LAT1:LEU4:PRE6:RPP2A:ARG1:IDH2:SRL1:VPH1:YOR285W:ALD4:ALD6:RPL5:RPL1A:FAS2:FUM1:AT…	5749:5960:5945:5783:5784:5948:9277:5788:5967:5789:16281:42645:5625:324:5750:31307:5751:5840:329:5842:5737:5754:276:5739:5934:5756:5829:9353:5758:5759:5794:19773:45121:5886:220:221:30134:31206:5634:5740:5741:16020:16021:5832:5835:5762:30176:5853
5737	cytoplasm	86 out of 92 genes, 93.5%	3694 out of 7288 background genes, 50.7%	4.26e-17	SSA1:CDC19:GCV3:COR1:ATP3:PHO88:VMA2:PGI1:FMP51:ILV6:YCP4:PGK1:PST2:SED1:SDH4:RTN1:QCR7:RIP1:RPL12A:SAH1:MET6:PDA1:HSP12:PMA1:OLE1:PYC1:HXK2:ACB1:ERG25:ADE3:TRX2:YHB1:FMP43:RPL8A:ERG11:ARG4:YHR162W:KGD1:URA2:TIF2:OPI3:MIR1:ATP2:HOM6:FBA1:YNK1:MDH1:ACP1:YEF3:ATP14:SEC61:COX8:MRPL39:ERV25:NDI1:MIC17:NDE1:HSC82:PFK2:RPL20A:COX7:PBI2:IDH1:COX5A:POR1:LAT1:LEU4:PRE6:RPP2A:ARG1:STI1:IDH2:SRL1:VPH1:YOR28…	5749:5960:5945:5783:5784:5948:9277:5788:5967:5789:16281:42645:5625:324:5750:31307:5751:5840:329:5842:5737:5754:276:5739:5934:5756:5829:9353:5758:5759:5794:19773:45121:5886:220:221:30134:31206:5634:5740:5741:16020:16021:5832:5835:5762:30176:5853
44429	mitochondrial part	28 out of 92 genes, 30.4%	443 out of 7288 background genes, 6.1%	4.66e-11	COR1:ATP3:ILV6:SDH4:QCR7:RIP1:PDA1:YHB1:KGD1:MIR1:ATP2:YNK1:MDH1:ATP14:COX8:MRPL39:NDI1:MIC17:COX7:IDH1:COX5A:POR1:LAT1:IDH2:YOR285W:ALD4:FUM1:ATP15	5749:5783:5948:5967:42645:5625:5750:31307:5751:5737:5754:276:5739:5829:5756:9353:5758:5759:5634:5740:5741:5762
43229	intracellular organelle	82 out of 92 genes, 89.1%	4021 out of 7288 background genes, 55.2%	1.98e-10	SSA1:GCV3:COR1:ATP3:PHO88:VMA2:PGI1:FMP51:ILV6:YCP4:PGK1:PST2:SED1:SDH4:RTN1:QCR7:RIP1:RPL12A:BMH1:PDA1:HSP12:PMA1:OLE1:HXK2:ACB1:ERG25:ADE3:TRX2:YHB1:FMP43:RPL8A:SBP1:ERG11:YHR162W:KGD1:URA2:TIF2:OPI3:MIR1:ATP2:HOM6:FBA1:YNK1:MDH1:ACP1:YEF3:ATP14:SEC61:COX8:MRPL39:ERV25:NDI1:MIC17:NDE1:HSC82:PFK2:RPL20A:COX7:DSK2:PBI2:IDH1:COX5A:POR1:LAT1:LEU4:PRE6:RPP2A:IDH2:SRL1:VPH1:YOR285W:ALD4:GDH1:ALD6:RPL…	5749:5960:5945:5783:5784:5948:9277:5788:5967:5789:16281:42645:5625:5730:324:5750:31307:5751:5840:329:5842:5737:5754:276:5739:5934:5829:5756:9353:5758:5759:5794:19773:45121:5886:220:221:30134:31206:5634:5740:5741:16020:16021:5832:5835:5762:30176:5853
43226	organelle	82 out of 92 genes, 89.1%	4022 out of 7288 background genes, 55.2%	2.01e-10	SSA1:GCV3:COR1:ATP3:PHO88:VMA2:PGI1:FMP51:ILV6:YCP4:PGK1:PST2:SED1:SDH4:RTN1:QCR7:RIP1:RPL12A:BMH1:PDA1:HSP12:PMA1:OLE1:HXK2:ACB1:ERG25:ADE3:TRX2:YHB1:FMP43:RPL8A:SBP1:ERG11:YHR162W:KGD1:URA2:TIF2:OPI3:MIR1:ATP2:HOM6:FBA1:YNK1:MDH1:ACP1:YEF3:ATP14:SEC61:COX8:MRPL39:ERV25:NDI1:MIC17:NDE1:HSC82:PFK2:RPL20A:COX7:DSK2:PBI2:IDH1:COX5A:POR1:LAT1:LEU4:PRE6:RPP2A:IDH2:SRL1:VPH1:YOR285W:ALD4:GDH1:ALD6:RPL…	5749:5960:5945:5783:5784:5948:9277:5788:5967:5789:16281:42645:5625:5730:324:5750:31307:5751:5840:329:5842:5737:5754:276:5739:5934:5829:5756:9353:5758:5759:5794:19773:45121:5886:220:221:30134:31206:5634:5740:5741:16020:16021:5832:5835:5762:30176:5853
44424	intracellular part	90 out of 92 genes, 97.8%	5052 out of 7288 background genes, 69.3%	2.23e-10	SSA1:CDC19:GCV3:COR1:ATP3:PHO88:VMA2:PGI1:FMP51:ILV6:YCP4:PGK1:PST2:SED1:UBC1:SDH4:RTN1:QCR7:RIP1:RPL12A:SAH1:MET6:BMH1:PDA1:HSP12:PMA1:OLE1:PYC1:HXK2:ACB1:ERG25:ADE3:TRX2:YHB1:FMP43:RPL8A:SBP1:ERG11:ARG4:YHR162W:KGD1:URA2:TIF2:OPI3:MIR1:ATP2:HOM6:FBA1:YNK1:MDH1:ACP1:YEF3:ATP14:SEC61:COX8:MRPL39:ERV25:NDI1:MIC17:NDE1:HSC82:PFK2:RPL20A:COX7:DSK2:PBI2:IDH1:COX5A:POR1:LAT1:LEU4:PRE6:RPP2A:ARG1:STI1:…	5749:5960:5945:5783:5784:5948:9277:5788:5967:5789:16281:42645:5625:5730:324:502:5750:31307:5751:5840:329:5842:5737:5754:276:5739:5934:5756:5829:9353:5758:5759:5794:19773:45121:5886:220:221:30134:31206:5634:5740:5741:16020:16021:5832:5835:5762:30176:5853
5622	intracellular	90 out of 92 genes, 97.8%	5087 out of 7288 background genes, 69.8%	4.06e-10	SSA1:CDC19:GCV3:COR1:ATP3:PHO88:VMA2:PGI1:FMP51:ILV6:YCP4:PGK1:PST2:SED1:UBC1:SDH4:RTN1:QCR7:RIP1:RPL12A:SAH1:MET6:BMH1:PDA1:HSP12:PMA1:OLE1:PYC1:HXK2:ACB1:ERG25:ADE3:TRX2:YHB1:FMP43:RPL8A:SBP1:ERG11:ARG4:YHR162W:KGD1:URA2:TIF2:OPI3:MIR1:ATP2:HOM6:FBA1:YNK1:MDH1:ACP1:YEF3:ATP14:SEC61:COX8:MRPL39:ERV25:NDI1:MIC17:NDE1:HSC82:PFK2:RPL20A:COX7:DSK2:PBI2:IDH1:COX5A:POR1:LAT1:LEU4:PRE6:RPP2A:ARG1:STI1:…	5749:5960:5945:5783:5784:5948:9277:5788:5967:5789:16281:42645:5625:5730:324:502:5750:31307:5751:5840:329:5842:5737:5754:276:5739:5934:5756:5829:9353:5758:5759:5794:19773:45121:5886:220:221:30134:31206:5634:5740:5741:16020:16021:5832:5835:5762:30176:5853
44464	cell part	91 out of 92 genes, 98.9%	5495 out of 7288 background genes, 75.4%	1.93e-08	SSA1:CDC19:GCV3:COR1:ATP3:PHO88:VMA2:PGI1:FMP51:ILV6:YCP4:PGK1:PST2:SED1:UBC1:SDH4:RTN1:ITR1:QCR7:RIP1:RPL12A:SAH1:MET6:BMH1:PDA1:HSP12:PMA1:OLE1:PYC1:HXK2:ACB1:ERG25:ADE3:TRX2:YHB1:FMP43:RPL8A:SBP1:ERG11:ARG4:YHR162W:KGD1:URA2:TIF2:OPI3:MIR1:ATP2:HOM6:FBA1:YNK1:MDH1:ACP1:YEF3:ATP14:SEC61:COX8:MRPL39:ERV25:NDI1:MIC17:NDE1:HSC82:PFK2:RPL20A:COX7:DSK2:PBI2:IDH1:COX5A:POR1:LAT1:LEU4:PRE6:RPP2A:ARG1:…	5749:5960:5945:5783:5784:5948:9277:5788:5967:5789:16281:42645:5625:5730:324:502:5750:31307:5751:5840:329:5842:5737:5754:276:5739:5934:5756:5829:9353:5758:5759:5794:19773:45121:5886:220:221:30134:31206:5634:5740:5741:16020:16021:5832:5835:5762:30176:5853
44455	mitochondrial membrane part	12 out of 92 genes, 13.0%	98 out of 7288 background genes, 1.3%	3.73e-07	COR1:ATP3:SDH4:QCR7:RIP1:ATP2:ATP14:COX8:COX7:COX5A:POR1:ATP15	5749:5625:5750:31307:5751:5754:276:5739:5756:5741
43227	membrane-bound organelle	73 out of 92 genes, 79.3%	3674 out of 7288 background genes, 50.4%	1.12e-06	SSA1:GCV3:COR1:ATP3:PHO88:VMA2:PGI1:FMP51:ILV6:YCP4:PGK1:PST2:SED1:SDH4:RTN1:QCR7:RIP1:BMH1:PDA1:HSP12:PMA1:OLE1:HXK2:ACB1:ERG25:ADE3:TRX2:YHB1:FMP43:SBP1:ERG11:YHR162W:KGD1:URA2:OPI3:MIR1:ATP2:HOM6:FBA1:YNK1:MDH1:ACP1:ATP14:SEC61:COX8:MRPL39:ERV25:NDI1:MIC17:NDE1:HSC82:PFK2:COX7:DSK2:PBI2:IDH1:COX5A:POR1:LAT1:LEU4:PRE6:IDH2:SRL1:VPH1:YOR285W:ALD4:GDH1:ALD6:FAS2:FUM1:ATP15:TEF1:NCE102	5749:5960:5945:5783:5784:5948:9277:5788:5967:5789:42645:5625:5730:324:5750:31307:5751:5840:329:5737:5754:276:5739:5934:5829:5756:9353:5758:5759:5794:19773:45121:5886:220:221:30134:31206:5634:5740:5741:16020:16021:5832:5835:5762:30176:5853
43231	intracellular membrane-bound organelle	73 out of 92 genes, 79.3%	3674 out of 7288 background genes, 50.4%	1.12e-06	SSA1:GCV3:COR1:ATP3:PHO88:VMA2:PGI1:FMP51:ILV6:YCP4:PGK1:PST2:SED1:SDH4:RTN1:QCR7:RIP1:BMH1:PDA1:HSP12:PMA1:OLE1:HXK2:ACB1:ERG25:ADE3:TRX2:YHB1:FMP43:SBP1:ERG11:YHR162W:KGD1:URA2:OPI3:MIR1:ATP2:HOM6:FBA1:YNK1:MDH1:ACP1:ATP14:SEC61:COX8:MRPL39:ERV25:NDI1:MIC17:NDE1:HSC82:PFK2:COX7:DSK2:PBI2:IDH1:COX5A:POR1:LAT1:LEU4:PRE6:IDH2:SRL1:VPH1:YOR285W:ALD4:GDH1:ALD6:FAS2:FUM1:ATP15:TEF1:NCE102	5749:5960:5945:5783:5784:5948:9277:5788:5967:5789:42645:5625:5730:324:5750:31307:5751:5840:329:5737:5754:276:5739:5934:5829:5756:9353:5758:5759:5794:19773:45121:5886:220:221:30134:31206:5634:5740:5741:16020:16021:5832:5835:5762:30176:5853
5746	mitochondrial electron transport chain	7 out of 92 genes, 7.6%	26 out of 7288 background genes, 0.4%	3.11e-06	COR1:SDH4:QCR7:RIP1:COX8:COX7:COX5A	5749:5750:5751:5739
5740	mitochondrial envelope	16 out of 92 genes, 17.4%	288 out of 7288 background genes, 4.0%	6.91e-05	COR1:ATP3:SDH4:QCR7:RIP1:MIR1:ATP2:YNK1:ATP14:COX8:MIC17:COX7:COX5A:POR1:YOR285W:ATP15	5749:5783:5625:5750:31307:5751:5737:5754:276:5739:5829:5756:5758:5634:5740:5741
31980	mitochondrial lumen	12 out of 92 genes, 13.0%	166 out of 7288 background genes, 2.3%	0.00013	ILV6:PDA1:YHB1:KGD1:MDH1:MRPL39:NDI1:IDH1:LAT1:IDH2:ALD4:FUM1	5948:5967:42645:5737:5739:5829:9353:5759:5762
5759	mitochondrial matrix	12 out of 92 genes, 13.0%	166 out of 7288 background genes, 2.3%	0.00013	ILV6:PDA1:YHB1:KGD1:MDH1:MRPL39:NDI1:IDH1:LAT1:IDH2:ALD4:FUM1	5948:5967:42645:5737:5739:5829:9353:5759:5762
16469	proton-transporting two-sector ATPase complex	6 out of 92 genes, 6.5%	35 out of 7288 background genes, 0.5%	0.00058	ATP3:VMA2:ATP2:ATP14:VPH1:ATP15	5625:329:5737:5754:276:5739:5756:220:221
5743	mitochondrial inner membrane	11 out of 92 genes, 12.0%	161 out of 7288 background genes, 2.2%	0.0007	COR1:ATP3:SDH4:QCR7:RIP1:ATP2:ATP14:COX8:COX7:COX5A:ATP15	5749:5625:5750:5751:5754:276:5739:5756
44425	membrane part	22 out of 92 genes, 23.9%	614 out of 7288 background genes, 8.4%	0.00073	COR1:ATP3:VMA2:SDH4:RTN1:QCR7:RIP1:PMA1:OLE1:ERG25:URA2:ATP2:ATP14:SEC61:COX8:COX7:COX5A:POR1:VPH1:YOR285W:ATP15:NCE102	5749:5783:5784:5788:5789:5625:5750:329:31307:5751:5737:5754:276:5739:5756:5794:45121:5886:220:221:31206:5741:16021:30176
5829	cytosol	22 out of 92 genes, 23.9%	617 out of 7288 background genes, 8.5%	0.00079	SSA1:CDC19:PGI1:RPL12A:PYC1:HXK2:TRX2:YHB1:RPL8A:ARG4:FBA1:YNK1:PFK2:RPL20A:PRE6:RPP2A:ARG1:ALD6:RPL5:RPL1A:FUM1:RPL11A	5945:9277:324:329:5842:5737:5739:5829:5758:5759:19773:5634:5832
42645	mitochondrial nucleoid	5 out of 92 genes, 5.4%	23 out of 7288 background genes, 0.3%	0.00114	ILV6:PDA1:KGD1:IDH1:ALD4	5948:5967:42645:5739:9353:5759
9295	nucleoid	5 out of 92 genes, 5.4%	23 out of 7288 background genes, 0.3%	0.00114	ILV6:PDA1:KGD1:IDH1:ALD4	5948:5967:42645:5739:9353:5759
43234	protein complex	34 out of 92 genes, 37.0%	1291 out of 7288 background genes, 17.7%	0.00114	SSA1:GCV3:COR1:ATP3:VMA2:ILV6:UBC1:SDH4:QCR7:RIP1:RPL12A:PDA1:RPL8A:KGD1:TIF2:ATP2:ATP14:SEC61:COX8:MRPL39:PFK2:RPL20A:COX7:COX5A:LAT1:PRE6:RPP2A:VPH1:RPL5:RPL1A:FAS2:ATP15:TEF1:RPL11A	5749:5960:5945:5784:5948:9277:5788:5967:16281:42645:5625:502:5750:5751:5840:329:5842:5737:5754:276:5739:5829:5756:9353:5759:19773:220:221:31206:5634:5832:5835:5762:30176:5853
19866	organelle inner membrane	11 out of 92 genes, 12.0%	171 out of 7288 background genes, 2.3%	0.00126	COR1:ATP3:SDH4:QCR7:RIP1:ATP2:ATP14:COX8:COX7:COX5A:ATP15	5749:5625:5750:5751:5754:276:5739:5756
31966	mitochondrial membrane	13 out of 92 genes, 14.1%	247 out of 7288 background genes, 3.4%	0.00165	COR1:ATP3:SDH4:QCR7:RIP1:ATP2:ATP14:COX8:COX7:COX5A:POR1:YOR285W:ATP15	5749:5783:5625:5750:31307:5751:5754:276:5739:5756:5741
275	mitochondrial proton-transporting ATP synthase complex, catalytic core F(1)	3 out of 92 genes, 3.3%	5 out of 7288 background genes, 0.1%	0.00271	ATP3:ATP2:ATP15	5625:5754:5739:5756
45261	proton-transporting ATP synthase complex, catalytic core F(1)	3 out of 92 genes, 3.3%	5 out of 7288 background genes, 0.1%	0.00271	ATP3:ATP2:ATP15	5625:5754:5739:5756
31967	organelle envelope	16 out of 92 genes, 17.4%	392 out of 7288 background genes, 5.4%	0.00373	COR1:ATP3:SDH4:QCR7:RIP1:MIR1:ATP2:YNK1:ATP14:COX8:MIC17:COX7:COX5A:POR1:YOR285W:ATP15	5749:5783:5625:5750:31307:5751:5737:5754:276:5739:5829:5756:5758:5634:5740:5741
31975	envelope	16 out of 92 genes, 17.4%	392 out of 7288 background genes, 5.4%	0.00373	COR1:ATP3:SDH4:QCR7:RIP1:MIR1:ATP2:YNK1:ATP14:COX8:MIC17:COX7:COX5A:POR1:YOR285W:ATP15	5749:5783:5625:5750:31307:5751:5737:5754:276:5739:5829:5756:5758:5634:5740:5741
31090	organelle membrane	20 out of 92 genes, 21.7%	619 out of 7288 background genes, 8.5%	0.00968	SSA1:COR1:ATP3:VMA2:SDH4:RTN1:QCR7:RIP1:OLE1:ERG25:ATP2:ATP14:SEC61:COX8:COX7:COX5A:POR1:VPH1:YOR285W:ATP15	5749:5783:5784:9277:5788:5789:5625:5750:31307:5751:329:5737:5754:276:5739:5756:5794:5886:220:221:31206:5634:5741:5832:30176
Bi-Cluster 13	score =569			Mean pattern, and conditions
YGR037C	ACB1	YGR037C
YPL061W	ALD6	YPL061W
YOR374W	ALD4	YOR374W
YOL058W	ARG1	YOL058W
YHR018C	ARG4	YHR018C
YLR295C	ATP14	YLR295C
YPL271W	ATP15	YPL271W
YJR121W	ATP2	YJR121W
YBR039W	ATP3	YBR039W
YJR148W	BAT2	YJR148W
YER177W	BMH1	YER177W
YDR099W	BMH2	YDR099W
YBR109C	CMD1	YBR109C
YNL052W	COX5A	YNL052W
YMR256C	COX7	YMR256C
YLR395C	COX8	YLR395C
YMR276W	DSK2	YMR276W
YNL327W	EGT2	YNL327W
YHR007C	ERG11	YHR007C
YGR060W	ERG25	YGR060W
YML012W	ERV25	YML012W
YPL231W	FAS2	YPL231W
YKL060C	FBA1	YKL060C
YPL262W	FUM1	YPL262W
YOR375C	GDH1	YOR375C
YML075C	HMG1	YML075C
YML126C	ERG13	YML126C
YJR139C	HOM6	YJR139C
YMR186W	HSC82	YMR186W
YFL014W	HSP12	YFL014W
YBR072W	HSP26	YBR072W
YIR037W	HYR1	YIR037W
YCL009C	ILV6	YCL009C
YDR497C	ITR1	YDR497C
YNL071W	LAT1	YNL071W
YNL104C	LEU4	YNL104C
YGR244C	LSC2	YGR244C
YKL085W	MDH1	YKL085W
YOL126C	MDH2	YOL126C
YDL078C	MDH3	YDL078C
YJR077C	MIR1	YJR077C
YKL142W	MRP8	YKL142W
YPR149W	NCE102	YPR149W
YGL055W	OLE1	YGL055W
YJR073C	OPI3	YJR073C
YNL015W	PBI2	YNL015W
YER178W	PDA1	YER178W
YOL147C	PEX11	YOL147C
YMR205C	PFK2	YMR205C
YBR196C	PGI1	YBR196C
YCR012W	PGK1	YCR012W
YNL055C	POR1	YNL055C
YEL060C	PRB1	YEL060C
YFR050C	PRE4	YFR050C
YMR314W	PRE5	YMR314W
YOL038W	PRE6	YOL038W
YML092C	PRE8	YML092C
YAL038W	CDC19	YAL038W
YDR529C	QCR7	YDR529C
YEL024W	RIP1	YEL024W
YGR180C	RNR4	YGR180C
YPR102C	RPL11A	YPR102C
YEL054C	RPL12A	YEL054C
YPL220W	RPL1A	YPL220W
YMR242C	RPL20A	YMR242C
YPL131W	RPL5	YPL131W
YHL033C	RPL8A	YHL033C
YOL039W	RPP2A	YOL039W
YKL117W	SBA1	YKL117W
YHL034C	SBP1	YHL034C
YDR178W	SDH4	YDR178W
YDR077W	SED1	YDR077W
YNL007C	SIS1	YNL007C
YAL005C	SSA1	YAL005C
YBR169C	SSE2	YBR169C
YOR027W	STI1	YOR027W
YPR080W	TEF1	YPR080W
YJL138C	TIF2	YJL138C
YBR126C	TPS1	YBR126C
YGR209C	TRX2	YGR209C
YJL130C	URA2	YJL130C
YOR270C	VPH1	YOR270C
YBR101C	FES1	YBR101C
YBR149W	ARA1	YBR149W
YCL035C	GRX1	YCL035C
YCR004C	YCP4	YCR004C
YDL046W	NPC2	YDL046W
YDL110C	TMA17	YDL110C
YDR032C	PST2	YDR032C
YDR233C	RTN1	YDR233C
YDR384C	ATO3	YDR384C
YLR249W	YEF3	YLR249W
YER004W	FMP52	YER004W
YGL037C	PNC1	YGL037C
YGR243W	FMP43	YGR243W
YIL124W	AYR1	YIL124W
YJR044C	VPS55	YJR044C
YMR145C	NDE1	YMR145C
YKL067W	YNK1	YKL067W
YOR285W	non	YOR285W
YPL135W	ISU1	YPL135W
GO Enrichments
Process
GOID	GO_term	Cluster frequency	Background frequency	P-value	Gene(s) annotated to the term	Directly Annotated GOID List
8152	metabolic process	85 out of 101 genes, 84.2%	3509 out of 7288 background genes, 48.1%	1.8e-11	SSA1:CDC19:ATP3:HSP26:FES1:TPS1:ARA1:SSE2:PGI1:ILV6:GRX1:PGK1:MDH3:BMH2:SDH4:ATO3:QCR7:RIP1:RPL12A:PRB1:BMH1:PDA1:HSP12:PRE4:PNC1:OLE1:ACB1:ERG25:RNR4:TRX2:LSC2:RPL8A:SBP1:ERG11:ARG4:AYR1:HYR1:URA2:TIF2:OPI3:ATP2:HOM6:BAT2:FBA1:YNK1:MDH1:SBA1:MRP8:YEF3:ATP14:COX8:HMG1:PRE8:ERG13:NDE1:HSC82:PFK2:RPL20A:COX7:DSK2:PRE5:SIS1:PBI2:COX5A:POR1:LAT1:LEU4:PRE6:RPP2A:ARG1:MDH2:PEX11:STI1:VPH1:ALD4:GDH1:ALD…	6656:19655:15986:9098:6696:77:6116:103:6879:18065:43248:6260:6511:6261:6409:9060:1321:6446:30503:183:6626:30433:6555:30435:6735:723:30437:16070:6950:6121:84:6122:7103:6123:5975:7031:5977:7035:6888:6412:6413:6414:6090:6164:7039:19413:6165:1:6094:42493:11:6096:9142:6526:6631:6348:6097:6098:1402:6633:6811:6099:6457:6635:6458:6636:42026:19740:52:6566:53:16226:7005:17062:6890:19856:6207:6067:1300:7155…
44237	cellular metabolic process	83 out of 101 genes, 82.2%	3429 out of 7288 background genes, 47.0%	1.09e-10	SSA1:CDC19:ATP3:HSP26:FES1:TPS1:SSE2:PGI1:ILV6:GRX1:PGK1:MDH3:BMH2:SDH4:QCR7:RIP1:RPL12A:PRB1:BMH1:PDA1:HSP12:PRE4:PNC1:OLE1:ACB1:ERG25:RNR4:TRX2:LSC2:RPL8A:SBP1:ERG11:ARG4:AYR1:HYR1:URA2:TIF2:OPI3:ATP2:HOM6:BAT2:FBA1:YNK1:MDH1:SBA1:MRP8:YEF3:ATP14:COX8:HMG1:PRE8:ERG13:NDE1:HSC82:PFK2:RPL20A:COX7:DSK2:PRE5:SIS1:PBI2:COX5A:POR1:LAT1:LEU4:PRE6:RPP2A:ARG1:MDH2:PEX11:STI1:VPH1:ALD4:GDH1:ALD6:RPL5:ISU…	6656:19655:15986:9098:6696:77:6116:103:6879:18065:43248:6260:6511:6261:6409:9060:1321:6446:30503:183:6626:30433:6555:30435:6735:723:30437:16070:6950:6121:84:6122:7103:6123:5975:7031:5977:7035:6888:6412:6413:6414:6090:6164:7039:19413:6165:1:6094:42493:11:6096:9142:6526:6631:6348:6097:1402:6098:6633:6811:6099:6635:6457:6458:6636:42026:52:6566:53:16226:7005:17062:6890:19856:6207:6067:1300:7155:1302:…
6091	generation of precursor metabolites and energy	25 out of 101 genes, 24.8%	336 out of 7288 background genes, 4.6%	1.01e-09	CDC19:ATP3:TPS1:PGI1:PGK1:MDH3:BMH2:SDH4:QCR7:RIP1:BMH1:LSC2:ATP2:FBA1:MDH1:ATP14:COX8:NDE1:PFK2:COX7:COX5A:POR1:MDH2:FUM1:ATP15	19655:15986:77:6116:9060:1321:6735:30437:6950:6121:6122:6123:5975:5977:6090:6094:42493:6096:6097:1402:6098:6811:6099:6635:7005:17062:1300:7265:6104:6106:6108:5992:7124:51436
19752	carboxylic acid metabolic process	24 out of 101 genes, 23.8%	308 out of 7288 background genes, 4.2%	1.12e-09	CDC19:PGI1:ILV6:PGK1:MDH3:PDA1:OLE1:ACB1:ARG4:AYR1:URA2:HOM6:BAT2:FBA1:MDH1:LAT1:LEU4:ARG1:MDH2:PEX11:GDH1:ALD6:FAS2:FUM1	9098:18065:6555:6735:7031:6090:19413:1:6094:42493:6096:6526:6631:6097:6098:6633:6099:6635:6636:52:6566:53:19856:6207:16559:6537:9082:9083:19395:6106:6108:15909:6541:9090:6654
6082	organic acid metabolic process	24 out of 101 genes, 23.8%	308 out of 7288 background genes, 4.2%	1.12e-09	CDC19:PGI1:ILV6:PGK1:MDH3:PDA1:OLE1:ACB1:ARG4:AYR1:URA2:HOM6:BAT2:FBA1:MDH1:LAT1:LEU4:ARG1:MDH2:PEX11:GDH1:ALD6:FAS2:FUM1	9098:18065:6555:6735:7031:6090:19413:1:6094:42493:6096:6526:6631:6097:6098:6633:6099:6635:6636:52:6566:53:19856:6207:16559:6537:9082:9083:19395:6106:6108:15909:6541:9090:6654
6119	oxidative phosphorylation	10 out of 101 genes, 9.9%	46 out of 7288 background genes, 0.6%	2.11e-07	ATP3:SDH4:QCR7:RIP1:ATP2:ATP14:COX8:COX7:COX5A:ATP15	15986:9060:1321:6121:6122:6123:6099:17062
32787	monocarboxylic acid metabolic process	13 out of 101 genes, 12.9%	121 out of 7288 background genes, 1.7%	4.28e-06	CDC19:PGI1:PGK1:MDH3:PDA1:OLE1:ACB1:FBA1:LAT1:MDH2:PEX11:ALD6:FAS2	18065:6735:7031:6090:19413:1:6094:6096:6631:6097:6098:6633:6635:6636:16559:19395:6108:15909
9058	biosynthetic process	40 out of 101 genes, 39.6%	1220 out of 7288 background genes, 16.7%	1.46e-05	SSA1:ATP3:FES1:TPS1:PGI1:ILV6:PGK1:RPL12A:ERG25:RPL8A:ERG11:ARG4:AYR1:URA2:TIF2:OPI3:ATP2:HOM6:BAT2:FBA1:YNK1:MRP8:YEF3:ATP14:HMG1:ERG13:RPL20A:SIS1:LEU4:RPP2A:ARG1:MDH2:GDH1:ALD6:RPL5:RPL1A:FAS2:ATP15:TEF1:RPL11A	6656:15986:9098:6696:18065:6409:1321:6446:6626:6555:16070:6950:5975:6412:6413:6414:6164:19413:6165:6094:42493:6096:9142:6526:6098:6633:6457:42026:52:6566:53:19856:6207:9117:6537:9082:9083:27:60:42254:6108:5992:6541:6259:6616:9090:6654
9987	cellular process	89 out of 101 genes, 88.1%	4701 out of 7288 background genes, 64.5%	2.8e-05	SSA1:CDC19:ATP3:HSP26:FES1:CMD1:TPS1:SSE2:PGI1:ILV6:GRX1:PGK1:MDH3:SED1:BMH2:SDH4:QCR7:RIP1:RPL12A:PRB1:BMH1:PDA1:HSP12:PRE4:PNC1:OLE1:ACB1:ERG25:RNR4:TRX2:LSC2:RPL8A:SBP1:ERG11:ARG4:AYR1:HYR1:URA2:TIF2:VPS55:OPI3:ATP2:HOM6:BAT2:FBA1:YNK1:MDH1:SBA1:MRP8:YEF3:ATP14:COX8:ERV25:HMG1:PRE8:ERG13:NDE1:HSC82:PFK2:RPL20A:COX7:DSK2:PRE5:SIS1:PBI2:COX5A:POR1:LAT1:LEU4:EGT2:PRE6:RPP2A:ARG1:MDH2:PEX11:STI1:V…	6656:19655:15986:9098:6696:77:6116:103:6879:18065:43248:6260:6511:6261:6409:7067:9060:1321:6446:30503:183:6626:30433:6555:30435:6735:723:30437:16070:6950:6121:84:6122:7103:6123:5975:7031:5977:7035:6888:6412:6413:6414:6090:6164:45324:7039:19413:6165:1:2:6094:42493:11:6096:9142:6526:6631:6348:6097:1402:6098:6633:6811:6099:6635:6457:6458:6636:42026:52:6566:53:910:16226:7005:17062:6890:19856:6207:711…
44238	primary metabolic process	71 out of 101 genes, 70.3%	3207 out of 7288 background genes, 44.0%	3.23e-05	SSA1:CDC19:ATP3:HSP26:FES1:TPS1:ARA1:SSE2:PGI1:ILV6:PGK1:MDH3:BMH2:SDH4:QCR7:RPL12A:PRB1:BMH1:PRE4:PNC1:OLE1:ACB1:ERG25:RNR4:TRX2:LSC2:RPL8A:SBP1:ERG11:ARG4:AYR1:URA2:TIF2:OPI3:ATP2:HOM6:BAT2:FBA1:YNK1:MDH1:SBA1:MRP8:YEF3:ATP14:HMG1:PRE8:ERG13:NDE1:HSC82:PFK2:RPL20A:DSK2:PRE5:SIS1:PBI2:LEU4:PRE6:RPP2A:ARG1:MDH2:PEX11:STI1:VPH1:GDH1:RPL5:RPL1A:FAS2:FUM1:ATP15:TEF1:RPL11A	6656:19655:15986:9098:6696:77:6116:103:18065:43248:6260:6511:6261:6409:9060:1321:6446:30503:183:6626:30433:6555:30435:6735:723:30437:16070:6950:6121:84:6122:7103:5975:7031:5977:7035:6888:6412:6413:6414:6090:6164:7039:6165:1:6094:42493:11:6096:9142:6526:6631:6348:6097:1402:6098:6633:6099:6635:6457:6458:6636:42026:52:6566:53:17062:6890:19856:6207:1300:1302:9117:6461:16559:30162:7265:6537:19358:9082…
15980	energy derivation by oxidation of organic compounds	18 out of 101 genes, 17.8%	298 out of 7288 background genes, 4.1%	4.97e-05	CDC19:TPS1:PGI1:PGK1:MDH3:BMH2:SDH4:QCR7:RIP1:BMH1:LSC2:FBA1:MDH1:NDE1:PFK2:POR1:MDH2:FUM1	19655:77:6116:9060:6735:30437:6950:6121:6122:5975:5977:6090:6094:42493:6096:6097:1402:6098:6811:6099:6635:7005:17062:1300:7265:6104:6106:6108:5992:7124:51436
6732	coenzyme metabolic process	12 out of 101 genes, 11.9%	135 out of 7288 background genes, 1.9%	0.00013	ATP3:PGI1:MDH3:SDH4:PNC1:LSC2:ATP2:MDH1:ATP14:NDE1:FUM1:ATP15	19655:15986:6116:1321:183:6735:6121:6094:6096:6348:6097:6098:6099:6635:1300:1302:19358:6104:6106:6108
51186	cofactor metabolic process	13 out of 101 genes, 12.9%	168 out of 7288 background genes, 2.3%	0.00021	ATP3:PGI1:MDH3:SDH4:PNC1:LSC2:ATP2:MDH1:ATP14:NDE1:ISU1:FUM1:ATP15	19655:15986:6116:6879:1321:183:6735:6121:6094:6096:6348:6097:6098:6099:6635:16226:1300:1302:19358:6104:6106:6108
6090	pyruvate metabolic process	7 out of 101 genes, 6.9%	36 out of 7288 background genes, 0.5%	0.00022	CDC19:PGI1:PGK1:PDA1:FBA1:LAT1:MDH2	6090:6094:6096:6098:6108
5975	carbohydrate metabolic process	15 out of 101 genes, 14.9%	229 out of 7288 background genes, 3.1%	0.00023	CDC19:TPS1:ARA1:PGI1:PGK1:MDH3:BMH2:SDH4:BMH1:LSC2:FBA1:MDH1:PFK2:MDH2:FUM1	77:6735:30437:6950:6121:5975:5977:6090:6094:42493:6096:6097:1402:6098:6099:6635:7265:6104:6106:6108:5992:7124:51436
42773	ATP synthesis coupled electron transport	6 out of 101 genes, 5.9%	25 out of 7288 background genes, 0.3%	0.00041	SDH4:QCR7:RIP1:COX8:COX7:COX5A	9060:6121:6122:6123:6099:17062
42775	organelle ATP synthesis coupled electron transport	6 out of 101 genes, 5.9%	25 out of 7288 background genes, 0.3%	0.00041	SDH4:QCR7:RIP1:COX8:COX7:COX5A	9060:6121:6122:6123:6099:17062
44262	cellular carbohydrate metabolic process	14 out of 101 genes, 13.9%	209 out of 7288 background genes, 2.9%	0.00044	CDC19:TPS1:PGI1:PGK1:MDH3:BMH2:SDH4:BMH1:LSC2:FBA1:MDH1:PFK2:MDH2:FUM1	77:6735:30437:6950:6121:5975:5977:6090:6094:42493:6096:6097:1402:6098:6099:6635:7265:6104:6106:6108:5992:7124:51436
44249	cellular biosynthetic process	35 out of 101 genes, 34.7%	1143 out of 7288 background genes, 15.7%	0.00087	SSA1:ATP3:FES1:TPS1:PGI1:ILV6:PGK1:RPL12A:RPL8A:ARG4:AYR1:URA2:TIF2:ATP2:HOM6:BAT2:FBA1:YNK1:MRP8:YEF3:ATP14:RPL20A:SIS1:LEU4:RPP2A:ARG1:MDH2:GDH1:ALD6:RPL5:RPL1A:FAS2:ATP15:TEF1:RPL11A	15986:9098:18065:6409:1321:6446:6626:6555:16070:6950:5975:6412:6413:6414:6164:19413:6165:6094:42493:6096:9142:6526:6098:6633:6457:42026:52:6566:53:19856:6207:9117:6537:9082:9083:27:60:42254:6108:5992:6541:6259:6616:9090:6654
6066	alcohol metabolic process	12 out of 101 genes, 11.9%	163 out of 7288 background genes, 2.2%	0.00105	CDC19:PGI1:PGK1:ERG25:ERG11:FBA1:HMG1:ERG13:NDE1:PFK2:MDH2:ALD4	19655:6696:6116:6090:6094:6096:6098:6067:1300:6108
43648	dicarboxylic acid metabolic process	4 out of 101 genes, 4.0%	8 out of 7288 background genes, 0.1%	0.0011	MDH3:MDH1:MDH2:FUM1	6735:6094:6097:6099:6635:6106:6108
6108	malate metabolic process	3 out of 101 genes, 3.0%	3 out of 7288 background genes, 0.0%	0.00122	MDH3:MDH1:MDH2	6735:6094:6097:6099:6635:6108
6100	tricarboxylic acid cycle intermediate metabolic process	5 out of 101 genes, 5.0%	19 out of 7288 background genes, 0.3%	0.00218	MDH3:LSC2:MDH1:MDH2:FUM1	6735:6094:6097:6099:6635:6104:6106:6108
6118	electron transport	6 out of 101 genes, 5.9%	33 out of 7288 background genes, 0.5%	0.00236	SDH4:QCR7:RIP1:COX8:COX7:COX5A	9060:6121:6122:6123:6099:17062
16310	phosphorylation	11 out of 101 genes, 10.9%	148 out of 7288 background genes, 2.0%	0.00261	ATP3:SDH4:QCR7:RIP1:ATP2:YNK1:ATP14:COX8:COX7:COX5A:ATP15	15986:9060:1321:16070:6121:6122:6123:6164:6165:9142:6099:17062:9117:6259
6096	glycolysis	5 out of 101 genes, 5.0%	24 out of 7288 background genes, 0.3%	0.00754	CDC19:PGI1:PGK1:FBA1:PFK2	6090:6094:6096:6098
6793	phosphorus metabolic process	12 out of 101 genes, 11.9%	199 out of 7288 background genes, 2.7%	0.00825	ATP3:SDH4:QCR7:RIP1:ATP2:YNK1:ATP14:COX8:COX7:COX5A:VPH1:ATP15	15986:9060:1321:16070:6121:6122:6123:7035:6164:6165:9142:6099:17062:9117:6461:6797:6259
6796	phosphate metabolic process	12 out of 101 genes, 11.9%	199 out of 7288 background genes, 2.7%	0.00825	ATP3:SDH4:QCR7:RIP1:ATP2:YNK1:ATP14:COX8:COX7:COX5A:VPH1:ATP15	15986:9060:1321:16070:6121:6122:6123:7035:6164:6165:9142:6099:17062:9117:6461:6797:6259
9117	nucleotide metabolic process	9 out of 101 genes, 8.9%	109 out of 7288 background genes, 1.5%	0.00843	ATP3:PGI1:MDH3:PNC1:ATP2:YNK1:ATP14:NDE1:ATP15	19655:15986:6116:1321:183:6735:16070:6164:6165:6094:6096:9142:6348:6097:6098:6635:1300:1302:9117:19358:6108:6259
Function
GOID	GO_term	Cluster frequency	Background frequency	P-value	Gene(s) annotated to the term	Directly Annotated GOID List
8152	metabolic process	85 out of 101 genes, 84.2%	3509 out of 7288 background genes, 48.1%	1.8e-11	SSA1:CDC19:ATP3:HSP26:FES1:TPS1:ARA1:SSE2:PGI1:ILV6:GRX1:PGK1:MDH3:BMH2:SDH4:ATO3:QCR7:RIP1:RPL12A:PRB1:BMH1:PDA1:HSP12:PRE4:PNC1:OLE1:ACB1:ERG25:RNR4:TRX2:LSC2:RPL8A:SBP1:ERG11:ARG4:AYR1:HYR1:URA2:TIF2:OPI3:ATP2:HOM6:BAT2:FBA1:YNK1:MDH1:SBA1:MRP8:YEF3:ATP14:COX8:HMG1:PRE8:ERG13:NDE1:HSC82:PFK2:RPL20A:COX7:DSK2:PRE5:SIS1:PBI2:COX5A:POR1:LAT1:LEU4:PRE6:RPP2A:ARG1:MDH2:PEX11:STI1:VPH1:ALD4:GDH1:ALD…	6656:19655:15986:9098:6696:77:6116:103:6879:18065:43248:6260:6511:6261:6409:9060:1321:6446:30503:183:6626:30433:6555:30435:6735:723:30437:16070:6950:6121:84:6122:7103:6123:5975:7031:5977:7035:6888:6412:6413:6414:6090:6164:7039:19413:6165:1:6094:42493:11:6096:9142:6526:6631:6348:6097:6098:1402:6633:6811:6099:6457:6635:6458:6636:42026:19740:52:6566:53:16226:7005:17062:6890:19856:6207:6067:1300:7155…
44237	cellular metabolic process	83 out of 101 genes, 82.2%	3429 out of 7288 background genes, 47.0%	1.09e-10	SSA1:CDC19:ATP3:HSP26:FES1:TPS1:SSE2:PGI1:ILV6:GRX1:PGK1:MDH3:BMH2:SDH4:QCR7:RIP1:RPL12A:PRB1:BMH1:PDA1:HSP12:PRE4:PNC1:OLE1:ACB1:ERG25:RNR4:TRX2:LSC2:RPL8A:SBP1:ERG11:ARG4:AYR1:HYR1:URA2:TIF2:OPI3:ATP2:HOM6:BAT2:FBA1:YNK1:MDH1:SBA1:MRP8:YEF3:ATP14:COX8:HMG1:PRE8:ERG13:NDE1:HSC82:PFK2:RPL20A:COX7:DSK2:PRE5:SIS1:PBI2:COX5A:POR1:LAT1:LEU4:PRE6:RPP2A:ARG1:MDH2:PEX11:STI1:VPH1:ALD4:GDH1:ALD6:RPL5:ISU…	6656:19655:15986:9098:6696:77:6116:103:6879:18065:43248:6260:6511:6261:6409:9060:1321:6446:30503:183:6626:30433:6555:30435:6735:723:30437:16070:6950:6121:84:6122:7103:6123:5975:7031:5977:7035:6888:6412:6413:6414:6090:6164:7039:19413:6165:1:6094:42493:11:6096:9142:6526:6631:6348:6097:1402:6098:6633:6811:6099:6635:6457:6458:6636:42026:52:6566:53:16226:7005:17062:6890:19856:6207:6067:1300:7155:1302:…
6091	generation of precursor metabolites and energy	25 out of 101 genes, 24.8%	336 out of 7288 background genes, 4.6%	1.01e-09	CDC19:ATP3:TPS1:PGI1:PGK1:MDH3:BMH2:SDH4:QCR7:RIP1:BMH1:LSC2:ATP2:FBA1:MDH1:ATP14:COX8:NDE1:PFK2:COX7:COX5A:POR1:MDH2:FUM1:ATP15	19655:15986:77:6116:9060:1321:6735:30437:6950:6121:6122:6123:5975:5977:6090:6094:42493:6096:6097:1402:6098:6811:6099:6635:7005:17062:1300:7265:6104:6106:6108:5992:7124:51436
19752	carboxylic acid metabolic process	24 out of 101 genes, 23.8%	308 out of 7288 background genes, 4.2%	1.12e-09	CDC19:PGI1:ILV6:PGK1:MDH3:PDA1:OLE1:ACB1:ARG4:AYR1:URA2:HOM6:BAT2:FBA1:MDH1:LAT1:LEU4:ARG1:MDH2:PEX11:GDH1:ALD6:FAS2:FUM1	9098:18065:6555:6735:7031:6090:19413:1:6094:42493:6096:6526:6631:6097:6098:6633:6099:6635:6636:52:6566:53:19856:6207:16559:6537:9082:9083:19395:6106:6108:15909:6541:9090:6654
6082	organic acid metabolic process	24 out of 101 genes, 23.8%	308 out of 7288 background genes, 4.2%	1.12e-09	CDC19:PGI1:ILV6:PGK1:MDH3:PDA1:OLE1:ACB1:ARG4:AYR1:URA2:HOM6:BAT2:FBA1:MDH1:LAT1:LEU4:ARG1:MDH2:PEX11:GDH1:ALD6:FAS2:FUM1	9098:18065:6555:6735:7031:6090:19413:1:6094:42493:6096:6526:6631:6097:6098:6633:6099:6635:6636:52:6566:53:19856:6207:16559:6537:9082:9083:19395:6106:6108:15909:6541:9090:6654
6119	oxidative phosphorylation	10 out of 101 genes, 9.9%	46 out of 7288 background genes, 0.6%	2.11e-07	ATP3:SDH4:QCR7:RIP1:ATP2:ATP14:COX8:COX7:COX5A:ATP15	15986:9060:1321:6121:6122:6123:6099:17062
32787	monocarboxylic acid metabolic process	13 out of 101 genes, 12.9%	121 out of 7288 background genes, 1.7%	4.28e-06	CDC19:PGI1:PGK1:MDH3:PDA1:OLE1:ACB1:FBA1:LAT1:MDH2:PEX11:ALD6:FAS2	18065:6735:7031:6090:19413:1:6094:6096:6631:6097:6098:6633:6635:6636:16559:19395:6108:15909
9058	biosynthetic process	40 out of 101 genes, 39.6%	1220 out of 7288 background genes, 16.7%	1.46e-05	SSA1:ATP3:FES1:TPS1:PGI1:ILV6:PGK1:RPL12A:ERG25:RPL8A:ERG11:ARG4:AYR1:URA2:TIF2:OPI3:ATP2:HOM6:BAT2:FBA1:YNK1:MRP8:YEF3:ATP14:HMG1:ERG13:RPL20A:SIS1:LEU4:RPP2A:ARG1:MDH2:GDH1:ALD6:RPL5:RPL1A:FAS2:ATP15:TEF1:RPL11A	6656:15986:9098:6696:18065:6409:1321:6446:6626:6555:16070:6950:5975:6412:6413:6414:6164:19413:6165:6094:42493:6096:9142:6526:6098:6633:6457:42026:52:6566:53:19856:6207:9117:6537:9082:9083:27:60:42254:6108:5992:6541:6259:6616:9090:6654
9987	cellular process	89 out of 101 genes, 88.1%	4701 out of 7288 background genes, 64.5%	2.8e-05	SSA1:CDC19:ATP3:HSP26:FES1:CMD1:TPS1:SSE2:PGI1:ILV6:GRX1:PGK1:MDH3:SED1:BMH2:SDH4:QCR7:RIP1:RPL12A:PRB1:BMH1:PDA1:HSP12:PRE4:PNC1:OLE1:ACB1:ERG25:RNR4:TRX2:LSC2:RPL8A:SBP1:ERG11:ARG4:AYR1:HYR1:URA2:TIF2:VPS55:OPI3:ATP2:HOM6:BAT2:FBA1:YNK1:MDH1:SBA1:MRP8:YEF3:ATP14:COX8:ERV25:HMG1:PRE8:ERG13:NDE1:HSC82:PFK2:RPL20A:COX7:DSK2:PRE5:SIS1:PBI2:COX5A:POR1:LAT1:LEU4:EGT2:PRE6:RPP2A:ARG1:MDH2:PEX11:STI1:V…	6656:19655:15986:9098:6696:77:6116:103:6879:18065:43248:6260:6511:6261:6409:7067:9060:1321:6446:30503:183:6626:30433:6555:30435:6735:723:30437:16070:6950:6121:84:6122:7103:6123:5975:7031:5977:7035:6888:6412:6413:6414:6090:6164:45324:7039:19413:6165:1:2:6094:42493:11:6096:9142:6526:6631:6348:6097:1402:6098:6633:6811:6099:6635:6457:6458:6636:42026:52:6566:53:910:16226:7005:17062:6890:19856:6207:711…
44238	primary metabolic process	71 out of 101 genes, 70.3%	3207 out of 7288 background genes, 44.0%	3.23e-05	SSA1:CDC19:ATP3:HSP26:FES1:TPS1:ARA1:SSE2:PGI1:ILV6:PGK1:MDH3:BMH2:SDH4:QCR7:RPL12A:PRB1:BMH1:PRE4:PNC1:OLE1:ACB1:ERG25:RNR4:TRX2:LSC2:RPL8A:SBP1:ERG11:ARG4:AYR1:URA2:TIF2:OPI3:ATP2:HOM6:BAT2:FBA1:YNK1:MDH1:SBA1:MRP8:YEF3:ATP14:HMG1:PRE8:ERG13:NDE1:HSC82:PFK2:RPL20A:DSK2:PRE5:SIS1:PBI2:LEU4:PRE6:RPP2A:ARG1:MDH2:PEX11:STI1:VPH1:GDH1:RPL5:RPL1A:FAS2:FUM1:ATP15:TEF1:RPL11A	6656:19655:15986:9098:6696:77:6116:103:18065:43248:6260:6511:6261:6409:9060:1321:6446:30503:183:6626:30433:6555:30435:6735:723:30437:16070:6950:6121:84:6122:7103:5975:7031:5977:7035:6888:6412:6413:6414:6090:6164:7039:6165:1:6094:42493:11:6096:9142:6526:6631:6348:6097:1402:6098:6633:6099:6635:6457:6458:6636:42026:52:6566:53:17062:6890:19856:6207:1300:1302:9117:6461:16559:30162:7265:6537:19358:9082…
15980	energy derivation by oxidation of organic compounds	18 out of 101 genes, 17.8%	298 out of 7288 background genes, 4.1%	4.97e-05	CDC19:TPS1:PGI1:PGK1:MDH3:BMH2:SDH4:QCR7:RIP1:BMH1:LSC2:FBA1:MDH1:NDE1:PFK2:POR1:MDH2:FUM1	19655:77:6116:9060:6735:30437:6950:6121:6122:5975:5977:6090:6094:42493:6096:6097:1402:6098:6811:6099:6635:7005:17062:1300:7265:6104:6106:6108:5992:7124:51436
6732	coenzyme metabolic process	12 out of 101 genes, 11.9%	135 out of 7288 background genes, 1.9%	0.00013	ATP3:PGI1:MDH3:SDH4:PNC1:LSC2:ATP2:MDH1:ATP14:NDE1:FUM1:ATP15	19655:15986:6116:1321:183:6735:6121:6094:6096:6348:6097:6098:6099:6635:1300:1302:19358:6104:6106:6108
51186	cofactor metabolic process	13 out of 101 genes, 12.9%	168 out of 7288 background genes, 2.3%	0.00021	ATP3:PGI1:MDH3:SDH4:PNC1:LSC2:ATP2:MDH1:ATP14:NDE1:ISU1:FUM1:ATP15	19655:15986:6116:6879:1321:183:6735:6121:6094:6096:6348:6097:6098:6099:6635:16226:1300:1302:19358:6104:6106:6108
6090	pyruvate metabolic process	7 out of 101 genes, 6.9%	36 out of 7288 background genes, 0.5%	0.00022	CDC19:PGI1:PGK1:PDA1:FBA1:LAT1:MDH2	6090:6094:6096:6098:6108
5975	carbohydrate metabolic process	15 out of 101 genes, 14.9%	229 out of 7288 background genes, 3.1%	0.00023	CDC19:TPS1:ARA1:PGI1:PGK1:MDH3:BMH2:SDH4:BMH1:LSC2:FBA1:MDH1:PFK2:MDH2:FUM1	77:6735:30437:6950:6121:5975:5977:6090:6094:42493:6096:6097:1402:6098:6099:6635:7265:6104:6106:6108:5992:7124:51436
42773	ATP synthesis coupled electron transport	6 out of 101 genes, 5.9%	25 out of 7288 background genes, 0.3%	0.00041	SDH4:QCR7:RIP1:COX8:COX7:COX5A	9060:6121:6122:6123:6099:17062
42775	organelle ATP synthesis coupled electron transport	6 out of 101 genes, 5.9%	25 out of 7288 background genes, 0.3%	0.00041	SDH4:QCR7:RIP1:COX8:COX7:COX5A	9060:6121:6122:6123:6099:17062
44262	cellular carbohydrate metabolic process	14 out of 101 genes, 13.9%	209 out of 7288 background genes, 2.9%	0.00044	CDC19:TPS1:PGI1:PGK1:MDH3:BMH2:SDH4:BMH1:LSC2:FBA1:MDH1:PFK2:MDH2:FUM1	77:6735:30437:6950:6121:5975:5977:6090:6094:42493:6096:6097:1402:6098:6099:6635:7265:6104:6106:6108:5992:7124:51436
44249	cellular biosynthetic process	35 out of 101 genes, 34.7%	1143 out of 7288 background genes, 15.7%	0.00087	SSA1:ATP3:FES1:TPS1:PGI1:ILV6:PGK1:RPL12A:RPL8A:ARG4:AYR1:URA2:TIF2:ATP2:HOM6:BAT2:FBA1:YNK1:MRP8:YEF3:ATP14:RPL20A:SIS1:LEU4:RPP2A:ARG1:MDH2:GDH1:ALD6:RPL5:RPL1A:FAS2:ATP15:TEF1:RPL11A	15986:9098:18065:6409:1321:6446:6626:6555:16070:6950:5975:6412:6413:6414:6164:19413:6165:6094:42493:6096:9142:6526:6098:6633:6457:42026:52:6566:53:19856:6207:9117:6537:9082:9083:27:60:42254:6108:5992:6541:6259:6616:9090:6654
6066	alcohol metabolic process	12 out of 101 genes, 11.9%	163 out of 7288 background genes, 2.2%	0.00105	CDC19:PGI1:PGK1:ERG25:ERG11:FBA1:HMG1:ERG13:NDE1:PFK2:MDH2:ALD4	19655:6696:6116:6090:6094:6096:6098:6067:1300:6108
43648	dicarboxylic acid metabolic process	4 out of 101 genes, 4.0%	8 out of 7288 background genes, 0.1%	0.0011	MDH3:MDH1:MDH2:FUM1	6735:6094:6097:6099:6635:6106:6108
6108	malate metabolic process	3 out of 101 genes, 3.0%	3 out of 7288 background genes, 0.0%	0.00122	MDH3:MDH1:MDH2	6735:6094:6097:6099:6635:6108
6100	tricarboxylic acid cycle intermediate metabolic process	5 out of 101 genes, 5.0%	19 out of 7288 background genes, 0.3%	0.00218	MDH3:LSC2:MDH1:MDH2:FUM1	6735:6094:6097:6099:6635:6104:6106:6108
6118	electron transport	6 out of 101 genes, 5.9%	33 out of 7288 background genes, 0.5%	0.00236	SDH4:QCR7:RIP1:COX8:COX7:COX5A	9060:6121:6122:6123:6099:17062
16310	phosphorylation	11 out of 101 genes, 10.9%	148 out of 7288 background genes, 2.0%	0.00261	ATP3:SDH4:QCR7:RIP1:ATP2:YNK1:ATP14:COX8:COX7:COX5A:ATP15	15986:9060:1321:16070:6121:6122:6123:6164:6165:9142:6099:17062:9117:6259
6096	glycolysis	5 out of 101 genes, 5.0%	24 out of 7288 background genes, 0.3%	0.00754	CDC19:PGI1:PGK1:FBA1:PFK2	6090:6094:6096:6098
6793	phosphorus metabolic process	12 out of 101 genes, 11.9%	199 out of 7288 background genes, 2.7%	0.00825	ATP3:SDH4:QCR7:RIP1:ATP2:YNK1:ATP14:COX8:COX7:COX5A:VPH1:ATP15	15986:9060:1321:16070:6121:6122:6123:7035:6164:6165:9142:6099:17062:9117:6461:6797:6259
6796	phosphate metabolic process	12 out of 101 genes, 11.9%	199 out of 7288 background genes, 2.7%	0.00825	ATP3:SDH4:QCR7:RIP1:ATP2:YNK1:ATP14:COX8:COX7:COX5A:VPH1:ATP15	15986:9060:1321:16070:6121:6122:6123:7035:6164:6165:9142:6099:17062:9117:6461:6797:6259
9117	nucleotide metabolic process	9 out of 101 genes, 8.9%	109 out of 7288 background genes, 1.5%	0.00843	ATP3:PGI1:MDH3:PNC1:ATP2:YNK1:ATP14:NDE1:ATP15	19655:15986:6116:1321:183:6735:16070:6164:6165:6094:6096:9142:6348:6097:6098:6635:1300:1302:9117:19358:6108:6259
Component
GOID	GO_term	Cluster frequency	Background frequency	P-value	Gene(s) annotated to the term	Directly Annotated GOID List
8152	metabolic process	85 out of 101 genes, 84.2%	3509 out of 7288 background genes, 48.1%	1.8e-11	SSA1:CDC19:ATP3:HSP26:FES1:TPS1:ARA1:SSE2:PGI1:ILV6:GRX1:PGK1:MDH3:BMH2:SDH4:ATO3:QCR7:RIP1:RPL12A:PRB1:BMH1:PDA1:HSP12:PRE4:PNC1:OLE1:ACB1:ERG25:RNR4:TRX2:LSC2:RPL8A:SBP1:ERG11:ARG4:AYR1:HYR1:URA2:TIF2:OPI3:ATP2:HOM6:BAT2:FBA1:YNK1:MDH1:SBA1:MRP8:YEF3:ATP14:COX8:HMG1:PRE8:ERG13:NDE1:HSC82:PFK2:RPL20A:COX7:DSK2:PRE5:SIS1:PBI2:COX5A:POR1:LAT1:LEU4:PRE6:RPP2A:ARG1:MDH2:PEX11:STI1:VPH1:ALD4:GDH1:ALD…	6656:19655:15986:9098:6696:77:6116:103:6879:18065:43248:6260:6511:6261:6409:9060:1321:6446:30503:183:6626:30433:6555:30435:6735:723:30437:16070:6950:6121:84:6122:7103:6123:5975:7031:5977:7035:6888:6412:6413:6414:6090:6164:7039:19413:6165:1:6094:42493:11:6096:9142:6526:6631:6348:6097:6098:1402:6633:6811:6099:6457:6635:6458:6636:42026:19740:52:6566:53:16226:7005:17062:6890:19856:6207:6067:1300:7155…
44237	cellular metabolic process	83 out of 101 genes, 82.2%	3429 out of 7288 background genes, 47.0%	1.09e-10	SSA1:CDC19:ATP3:HSP26:FES1:TPS1:SSE2:PGI1:ILV6:GRX1:PGK1:MDH3:BMH2:SDH4:QCR7:RIP1:RPL12A:PRB1:BMH1:PDA1:HSP12:PRE4:PNC1:OLE1:ACB1:ERG25:RNR4:TRX2:LSC2:RPL8A:SBP1:ERG11:ARG4:AYR1:HYR1:URA2:TIF2:OPI3:ATP2:HOM6:BAT2:FBA1:YNK1:MDH1:SBA1:MRP8:YEF3:ATP14:COX8:HMG1:PRE8:ERG13:NDE1:HSC82:PFK2:RPL20A:COX7:DSK2:PRE5:SIS1:PBI2:COX5A:POR1:LAT1:LEU4:PRE6:RPP2A:ARG1:MDH2:PEX11:STI1:VPH1:ALD4:GDH1:ALD6:RPL5:ISU…	6656:19655:15986:9098:6696:77:6116:103:6879:18065:43248:6260:6511:6261:6409:9060:1321:6446:30503:183:6626:30433:6555:30435:6735:723:30437:16070:6950:6121:84:6122:7103:6123:5975:7031:5977:7035:6888:6412:6413:6414:6090:6164:7039:19413:6165:1:6094:42493:11:6096:9142:6526:6631:6348:6097:1402:6098:6633:6811:6099:6635:6457:6458:6636:42026:52:6566:53:16226:7005:17062:6890:19856:6207:6067:1300:7155:1302:…
6091	generation of precursor metabolites and energy	25 out of 101 genes, 24.8%	336 out of 7288 background genes, 4.6%	1.01e-09	CDC19:ATP3:TPS1:PGI1:PGK1:MDH3:BMH2:SDH4:QCR7:RIP1:BMH1:LSC2:ATP2:FBA1:MDH1:ATP14:COX8:NDE1:PFK2:COX7:COX5A:POR1:MDH2:FUM1:ATP15	19655:15986:77:6116:9060:1321:6735:30437:6950:6121:6122:6123:5975:5977:6090:6094:42493:6096:6097:1402:6098:6811:6099:6635:7005:17062:1300:7265:6104:6106:6108:5992:7124:51436
19752	carboxylic acid metabolic process	24 out of 101 genes, 23.8%	308 out of 7288 background genes, 4.2%	1.12e-09	CDC19:PGI1:ILV6:PGK1:MDH3:PDA1:OLE1:ACB1:ARG4:AYR1:URA2:HOM6:BAT2:FBA1:MDH1:LAT1:LEU4:ARG1:MDH2:PEX11:GDH1:ALD6:FAS2:FUM1	9098:18065:6555:6735:7031:6090:19413:1:6094:42493:6096:6526:6631:6097:6098:6633:6099:6635:6636:52:6566:53:19856:6207:16559:6537:9082:9083:19395:6106:6108:15909:6541:9090:6654
6082	organic acid metabolic process	24 out of 101 genes, 23.8%	308 out of 7288 background genes, 4.2%	1.12e-09	CDC19:PGI1:ILV6:PGK1:MDH3:PDA1:OLE1:ACB1:ARG4:AYR1:URA2:HOM6:BAT2:FBA1:MDH1:LAT1:LEU4:ARG1:MDH2:PEX11:GDH1:ALD6:FAS2:FUM1	9098:18065:6555:6735:7031:6090:19413:1:6094:42493:6096:6526:6631:6097:6098:6633:6099:6635:6636:52:6566:53:19856:6207:16559:6537:9082:9083:19395:6106:6108:15909:6541:9090:6654
6119	oxidative phosphorylation	10 out of 101 genes, 9.9%	46 out of 7288 background genes, 0.6%	2.11e-07	ATP3:SDH4:QCR7:RIP1:ATP2:ATP14:COX8:COX7:COX5A:ATP15	15986:9060:1321:6121:6122:6123:6099:17062
32787	monocarboxylic acid metabolic process	13 out of 101 genes, 12.9%	121 out of 7288 background genes, 1.7%	4.28e-06	CDC19:PGI1:PGK1:MDH3:PDA1:OLE1:ACB1:FBA1:LAT1:MDH2:PEX11:ALD6:FAS2	18065:6735:7031:6090:19413:1:6094:6096:6631:6097:6098:6633:6635:6636:16559:19395:6108:15909
9058	biosynthetic process	40 out of 101 genes, 39.6%	1220 out of 7288 background genes, 16.7%	1.46e-05	SSA1:ATP3:FES1:TPS1:PGI1:ILV6:PGK1:RPL12A:ERG25:RPL8A:ERG11:ARG4:AYR1:URA2:TIF2:OPI3:ATP2:HOM6:BAT2:FBA1:YNK1:MRP8:YEF3:ATP14:HMG1:ERG13:RPL20A:SIS1:LEU4:RPP2A:ARG1:MDH2:GDH1:ALD6:RPL5:RPL1A:FAS2:ATP15:TEF1:RPL11A	6656:15986:9098:6696:18065:6409:1321:6446:6626:6555:16070:6950:5975:6412:6413:6414:6164:19413:6165:6094:42493:6096:9142:6526:6098:6633:6457:42026:52:6566:53:19856:6207:9117:6537:9082:9083:27:60:42254:6108:5992:6541:6259:6616:9090:6654
9987	cellular process	89 out of 101 genes, 88.1%	4701 out of 7288 background genes, 64.5%	2.8e-05	SSA1:CDC19:ATP3:HSP26:FES1:CMD1:TPS1:SSE2:PGI1:ILV6:GRX1:PGK1:MDH3:SED1:BMH2:SDH4:QCR7:RIP1:RPL12A:PRB1:BMH1:PDA1:HSP12:PRE4:PNC1:OLE1:ACB1:ERG25:RNR4:TRX2:LSC2:RPL8A:SBP1:ERG11:ARG4:AYR1:HYR1:URA2:TIF2:VPS55:OPI3:ATP2:HOM6:BAT2:FBA1:YNK1:MDH1:SBA1:MRP8:YEF3:ATP14:COX8:ERV25:HMG1:PRE8:ERG13:NDE1:HSC82:PFK2:RPL20A:COX7:DSK2:PRE5:SIS1:PBI2:COX5A:POR1:LAT1:LEU4:EGT2:PRE6:RPP2A:ARG1:MDH2:PEX11:STI1:V…	6656:19655:15986:9098:6696:77:6116:103:6879:18065:43248:6260:6511:6261:6409:7067:9060:1321:6446:30503:183:6626:30433:6555:30435:6735:723:30437:16070:6950:6121:84:6122:7103:6123:5975:7031:5977:7035:6888:6412:6413:6414:6090:6164:45324:7039:19413:6165:1:2:6094:42493:11:6096:9142:6526:6631:6348:6097:1402:6098:6633:6811:6099:6635:6457:6458:6636:42026:52:6566:53:910:16226:7005:17062:6890:19856:6207:711…
44238	primary metabolic process	71 out of 101 genes, 70.3%	3207 out of 7288 background genes, 44.0%	3.23e-05	SSA1:CDC19:ATP3:HSP26:FES1:TPS1:ARA1:SSE2:PGI1:ILV6:PGK1:MDH3:BMH2:SDH4:QCR7:RPL12A:PRB1:BMH1:PRE4:PNC1:OLE1:ACB1:ERG25:RNR4:TRX2:LSC2:RPL8A:SBP1:ERG11:ARG4:AYR1:URA2:TIF2:OPI3:ATP2:HOM6:BAT2:FBA1:YNK1:MDH1:SBA1:MRP8:YEF3:ATP14:HMG1:PRE8:ERG13:NDE1:HSC82:PFK2:RPL20A:DSK2:PRE5:SIS1:PBI2:LEU4:PRE6:RPP2A:ARG1:MDH2:PEX11:STI1:VPH1:GDH1:RPL5:RPL1A:FAS2:FUM1:ATP15:TEF1:RPL11A	6656:19655:15986:9098:6696:77:6116:103:18065:43248:6260:6511:6261:6409:9060:1321:6446:30503:183:6626:30433:6555:30435:6735:723:30437:16070:6950:6121:84:6122:7103:5975:7031:5977:7035:6888:6412:6413:6414:6090:6164:7039:6165:1:6094:42493:11:6096:9142:6526:6631:6348:6097:1402:6098:6633:6099:6635:6457:6458:6636:42026:52:6566:53:17062:6890:19856:6207:1300:1302:9117:6461:16559:30162:7265:6537:19358:9082…
15980	energy derivation by oxidation of organic compounds	18 out of 101 genes, 17.8%	298 out of 7288 background genes, 4.1%	4.97e-05	CDC19:TPS1:PGI1:PGK1:MDH3:BMH2:SDH4:QCR7:RIP1:BMH1:LSC2:FBA1:MDH1:NDE1:PFK2:POR1:MDH2:FUM1	19655:77:6116:9060:6735:30437:6950:6121:6122:5975:5977:6090:6094:42493:6096:6097:1402:6098:6811:6099:6635:7005:17062:1300:7265:6104:6106:6108:5992:7124:51436
6732	coenzyme metabolic process	12 out of 101 genes, 11.9%	135 out of 7288 background genes, 1.9%	0.00013	ATP3:PGI1:MDH3:SDH4:PNC1:LSC2:ATP2:MDH1:ATP14:NDE1:FUM1:ATP15	19655:15986:6116:1321:183:6735:6121:6094:6096:6348:6097:6098:6099:6635:1300:1302:19358:6104:6106:6108
51186	cofactor metabolic process	13 out of 101 genes, 12.9%	168 out of 7288 background genes, 2.3%	0.00021	ATP3:PGI1:MDH3:SDH4:PNC1:LSC2:ATP2:MDH1:ATP14:NDE1:ISU1:FUM1:ATP15	19655:15986:6116:6879:1321:183:6735:6121:6094:6096:6348:6097:6098:6099:6635:16226:1300:1302:19358:6104:6106:6108
6090	pyruvate metabolic process	7 out of 101 genes, 6.9%	36 out of 7288 background genes, 0.5%	0.00022	CDC19:PGI1:PGK1:PDA1:FBA1:LAT1:MDH2	6090:6094:6096:6098:6108
5975	carbohydrate metabolic process	15 out of 101 genes, 14.9%	229 out of 7288 background genes, 3.1%	0.00023	CDC19:TPS1:ARA1:PGI1:PGK1:MDH3:BMH2:SDH4:BMH1:LSC2:FBA1:MDH1:PFK2:MDH2:FUM1	77:6735:30437:6950:6121:5975:5977:6090:6094:42493:6096:6097:1402:6098:6099:6635:7265:6104:6106:6108:5992:7124:51436
42773	ATP synthesis coupled electron transport	6 out of 101 genes, 5.9%	25 out of 7288 background genes, 0.3%	0.00041	SDH4:QCR7:RIP1:COX8:COX7:COX5A	9060:6121:6122:6123:6099:17062
42775	organelle ATP synthesis coupled electron transport	6 out of 101 genes, 5.9%	25 out of 7288 background genes, 0.3%	0.00041	SDH4:QCR7:RIP1:COX8:COX7:COX5A	9060:6121:6122:6123:6099:17062
44262	cellular carbohydrate metabolic process	14 out of 101 genes, 13.9%	209 out of 7288 background genes, 2.9%	0.00044	CDC19:TPS1:PGI1:PGK1:MDH3:BMH2:SDH4:BMH1:LSC2:FBA1:MDH1:PFK2:MDH2:FUM1	77:6735:30437:6950:6121:5975:5977:6090:6094:42493:6096:6097:1402:6098:6099:6635:7265:6104:6106:6108:5992:7124:51436
44249	cellular biosynthetic process	35 out of 101 genes, 34.7%	1143 out of 7288 background genes, 15.7%	0.00087	SSA1:ATP3:FES1:TPS1:PGI1:ILV6:PGK1:RPL12A:RPL8A:ARG4:AYR1:URA2:TIF2:ATP2:HOM6:BAT2:FBA1:YNK1:MRP8:YEF3:ATP14:RPL20A:SIS1:LEU4:RPP2A:ARG1:MDH2:GDH1:ALD6:RPL5:RPL1A:FAS2:ATP15:TEF1:RPL11A	15986:9098:18065:6409:1321:6446:6626:6555:16070:6950:5975:6412:6413:6414:6164:19413:6165:6094:42493:6096:9142:6526:6098:6633:6457:42026:52:6566:53:19856:6207:9117:6537:9082:9083:27:60:42254:6108:5992:6541:6259:6616:9090:6654
6066	alcohol metabolic process	12 out of 101 genes, 11.9%	163 out of 7288 background genes, 2.2%	0.00105	CDC19:PGI1:PGK1:ERG25:ERG11:FBA1:HMG1:ERG13:NDE1:PFK2:MDH2:ALD4	19655:6696:6116:6090:6094:6096:6098:6067:1300:6108
43648	dicarboxylic acid metabolic process	4 out of 101 genes, 4.0%	8 out of 7288 background genes, 0.1%	0.0011	MDH3:MDH1:MDH2:FUM1	6735:6094:6097:6099:6635:6106:6108
6108	malate metabolic process	3 out of 101 genes, 3.0%	3 out of 7288 background genes, 0.0%	0.00122	MDH3:MDH1:MDH2	6735:6094:6097:6099:6635:6108
6100	tricarboxylic acid cycle intermediate metabolic process	5 out of 101 genes, 5.0%	19 out of 7288 background genes, 0.3%	0.00218	MDH3:LSC2:MDH1:MDH2:FUM1	6735:6094:6097:6099:6635:6104:6106:6108
6118	electron transport	6 out of 101 genes, 5.9%	33 out of 7288 background genes, 0.5%	0.00236	SDH4:QCR7:RIP1:COX8:COX7:COX5A	9060:6121:6122:6123:6099:17062
16310	phosphorylation	11 out of 101 genes, 10.9%	148 out of 7288 background genes, 2.0%	0.00261	ATP3:SDH4:QCR7:RIP1:ATP2:YNK1:ATP14:COX8:COX7:COX5A:ATP15	15986:9060:1321:16070:6121:6122:6123:6164:6165:9142:6099:17062:9117:6259
6096	glycolysis	5 out of 101 genes, 5.0%	24 out of 7288 background genes, 0.3%	0.00754	CDC19:PGI1:PGK1:FBA1:PFK2	6090:6094:6096:6098
6793	phosphorus metabolic process	12 out of 101 genes, 11.9%	199 out of 7288 background genes, 2.7%	0.00825	ATP3:SDH4:QCR7:RIP1:ATP2:YNK1:ATP14:COX8:COX7:COX5A:VPH1:ATP15	15986:9060:1321:16070:6121:6122:6123:7035:6164:6165:9142:6099:17062:9117:6461:6797:6259
6796	phosphate metabolic process	12 out of 101 genes, 11.9%	199 out of 7288 background genes, 2.7%	0.00825	ATP3:SDH4:QCR7:RIP1:ATP2:YNK1:ATP14:COX8:COX7:COX5A:VPH1:ATP15	15986:9060:1321:16070:6121:6122:6123:7035:6164:6165:9142:6099:17062:9117:6461:6797:6259
9117	nucleotide metabolic process	9 out of 101 genes, 8.9%	109 out of 7288 background genes, 1.5%	0.00843	ATP3:PGI1:MDH3:PNC1:ATP2:YNK1:ATP14:NDE1:ATP15	19655:15986:6116:1321:183:6735:16070:6164:6165:6094:6096:9142:6348:6097:6098:6635:1300:1302:9117:19358:6108:6259
Bi-Cluster 14	score = 660
				Mean pattern, and conditions
YGR037C	ACB1	YGR037C
YPL061W	ALD6	YPL061W
YOR374W	ALD4	YOR374W
YIL062C	ARC15	YIL062C
YOL058W	ARG1	YOL058W
YHR018C	ARG4	YHR018C
YLR295C	ATP14	YLR295C
YPL271W	ATP15	YPL271W
YJR121W	ATP2	YJR121W
YBR039W	ATP3	YBR039W
YJR148W	BAT2	YJR148W
YER177W	BMH1	YER177W
YDR099W	BMH2	YDR099W
YNL052W	COX5A	YNL052W
YMR256C	COX7	YMR256C
YLR395C	COX8	YLR395C
YMR276W	DSK2	YMR276W
YNL327W	EGT2	YNL327W
YHR007C	ERG11	YHR007C
YGR060W	ERG25	YGR060W
YML012W	ERV25	YML012W
YPL231W	FAS2	YPL231W
YKL060C	FBA1	YKL060C
YPL262W	FUM1	YPL262W
YOR375C	GDH1	YOR375C
YML075C	HMG1	YML075C
YML126C	ERG13	YML126C
YJR139C	HOM6	YJR139C
[truncated: 476 more rows]
