# Supplementary material for: Determinants of Protein Abundance and Translation Efficiency in S. cerevisiae
Source: PLoS Comput Biol. 2007 Dec 21;3(12):e248. doi: 10.1371/journal.pcbi.0030248 (PMC2230678; doi:10.1371/journal.pcbi.0030248)
Supplement: Table S7 — (A) Partial correlations of amino acid frequencies and protein abundance for all genes. The correlations for the amino acids alanine and valine are significant and positive, and the correlations for asparagine and serine are significant and negative. (B) Partial correlations of the frequencies of amino acids and protein abundance for genes with low mRNA levels (lower 20%) and high protein abundance (top 20%). The correlations for the amino acids alanine and valine are positive but not significant (due to the low number of genes). (13 KB XLS) [file pcbi.0030248.st007.xls]

## Sheet: Sheet1
Table S5A: Partial correlations of amino acids frequencies and protein abundance for all genes.
The correlations for the amino acids ALA and VAL
are significant and positive, and the correlations for ASP and SER are significant and negative.
All genes
Amino acid	Partial correlation with protein abundance given mRNA levels		Frequencies of amino acids
	Correlation	P - value
ala	0.1514	0	0.057
arg	-0.0331	0.0442	0.0459
asn	-0.0877	9.2063e-08	0.0593
asp	0.0989	1.6577e-09	0.0602
cys	-0.0572	0.0005	0.0124
gln	-0.0113	0.4935	0.0408
glu	0.1523	0	0.0689
gly	0.0725	1.0317e-05	0.0523
his	-0.0531	0.0012	0.0213
ile	-0.0011	0.9477	0.0633
leu	0.0141	0.393	0.0936
lys	0.0459	0.0052	0.0785
met	-0.0783	1.8902e-06	0.0208
phe	-0.0291	0.077	0.0422
pro	-0.0513	0.0018	0.0431
ser	-0.1794	4.1254e-28	0.0837
thr	-0.0558	0.0007	0.0564
trp	-0.0445	0.0068	0.0101
tyr	-0.0082	0.6171	0.0327
val	0.1052	1.4382e-10	0.0574
Table S5B: Partial correlations of the frequencies of amino acids and protein
abundance for genes with low mRNA levels (lower 20%) and high protein aboundance (top 20%).
The correlations for the amino acids ALA and VAL are positive but not significant (due to the low number of genes).
Genes with low mRNA levels ( lower 20%) and high protein abundance (top 20%), 15 genes
Amino acid	Partial correlation with protein abundance given mRNA levels		Frequencies of amino acids
	Correlation	P - value
ala	0.1301	0.6575	0.0526
arg	-0.125	0.6703	0.037
asn	0.3473	0.2238	0.0524
asp	0.5072	0.0642	0.0706
cys	0.0116	0.9685	0.0149
gln	-0.2978	0.3012	0.0342
glu	-0.1249	0.6704	0.0765
gly	0.0558	0.8497	0.052
his	-0.2025	0.4876	0.0262
ile	-0.2966	0.3031	0.0598
leu	-0.347	0.2241	0.0982
lys	0.3153	0.2722	0.0766
met	-0.1684	0.5649	0.0232
phe	-0.2246	0.4402	0.0454
pro	-0.1965	0.5008	0.0453
ser	0.0004	0.9988	0.0782
thr	-0.0559	0.8495	0.055
trp	-0.5226	0.0552	0.0102
tyr	-0.5508	0.0412	0.0354
val	0.4459	0.11	0.0562
