# Supplementary material for: Determinants of Protein Abundance and Translation Efficiency in S. cerevisiae
Source: PLoS Comput Biol. 2007 Dec 21;3(12):e248. doi: 10.1371/journal.pcbi.0030248 (PMC2230678; doi:10.1371/journal.pcbi.0030248)
Supplement: Table S9 — Table includes the open reading frame (ORF), name, RTE, and description of each gene. Genes that are related with regulation are marked in blue. GO enrichments according to SGD for this group of genes appear below. (27 KB XLS) [file pcbi.0030248.st009.xls]

## Sheet: p_m_of_extream_ratio
Table S7: Genes with RTE > 2.5; the table includes the ORF, name, RTE, and description of each gene.Genes that are related with regulation are marked in blue.
GO enrichments according to SGD for this group of genes appear below.
ORF	Name	RTE	Description
YFL014W	HSP12	9.20872	Plasma membrane localized protein that protects membranes from desiccation; induced by heat shock, oxidative stress, osmostress, stationary phase entry, glucose depletion, oleate and alcohol; regulated by the HOG and Ras-Pka pathways
YLR327C	TMA10	3.91768	ein of unknown function that associates with ribosomes
YLR050C	non	3.5801	Putative protein of unknown function; green fluorescent protein (GFP)-fusion protein localizes to the endoplasmic reticulum; YLR050C is not an essential gene
YPR067W	ISA2	4.13532	Protein required for maturation of mitochondrial and cytosolic Fe/S proteins, localizes to the mitochondrial intermembrane space, overexpression of ISA2 suppresses grx5 mutations
YMR032W	HOF1	4.82992	Bud neck-localized, SH3 domain-containing protein required for cytokinesis; regulates actomyosin ring dynamics and septin localization; interacts with the formins, Bni1p and Bnr1p, and with Cyk3p, Vrp1p, and Bni5p
YBR258C	SHG1	3.30122	Subunit of the COMPASS (Set1C) complex, which methylates histone H3 on lysine 4 and is required in transcriptional silencing near telomeres
YPR100W	MRPL51	3.77899	Mitochondrial ribosomal protein of the large subunit
YOR319W	HSH49	4.03062	U2-snRNP associated splicing factor with similarity to the mammalian splicing factor SAP49; proposed to function as a U2-snRNP assembly factor along with Hsh155p and binding partner Cus1p; contains two RNA recognition motifs (RRM)
YGR074W	SMD1	2.97729	Core Sm protein Sm D1; part of heteroheptameric complex (with Smb1p, Smd2p, Smd3p, Sme1p, Smx3p, and Smx2p) that is part of the spliceosomal U1, U2, U4, and U5 snRNPs; homolog of human Sm D1
YKL063C	non	3.4011	Putative protein of unknown function; green fluorescent protein (GFP)-fusion protein localizes to the Golgi
YBR268W	MRPL37	3.06312	Mitochondrial ribosomal protein of the large subunit
YMR315W	non	4.94853	Putative protein of unknown function; green fluorescent protein (GFP)-fusion protein localizes to the cytoplasm and nucleus; YMR315W is not an essential gene
YER062C	HOR2	2.68142	One of two redundant DL-glycerol-3-phosphatases (RHR2/GPP1 encodes the other) involved in glycerol biosynthesis; induced in response to hyperosmotic stress and oxidative stress, and during the diauxic transition
YOL023W	IFM1	4.02782	Mitochondrial translation initiation factor 2
YFR010W	UBP6	2.89387	Ubiquitin-specific protease situated in the base subcomplex of the 26S proteasome, releases free ubiquitin from branched polyubiquitin chains; deletion causes hypersensitivity to cycloheximide and other toxic compounds
YDR070C	FMP16	3.34499	Putative protein of unknown function; the authentic, non-tagged protein is detected in highly purified mitochondria in high-throughput studies
YMR286W	MRPL33	2.59548	Mitochondrial ribosomal protein of the large subunit
YHL021C	FMP12	3.1145	Putative protein of unknown function; the authentic, non-tagged protein is detected in highly purified mitochondria in high-throughput studies
YER161C	SPT2	3.26029	Protein involved in negative regulation of transcription; required for RNA polyadenylation; exhibits regulated interactions with both histones and SWI-SNF components, has similarity to mammalian HMG1 proteins
YPL047W	SGF11	2.56685	Integral subunit of SAGA histone acetyltransferase complex, regulates transcription of a subset of SAGA-regulated genes, required for the Ubp8p association with SAGA and for H2B deubiquitylation
YDR063W	non	2.70945	Putative protein of unknown function; green fluorescent protein (GFP)-fusion protein localizes to the cytoplasm and nucleus; YDR063W is not an essential gene
YCR036W	RBK1	2.64268	Putative ribokinase
YBL015W	ACH1	3.88523	Acetyl-coA hydrolase, primarily localized to mitochondria; required for acetate utilization and for diploid pseudohyphal growth
YBR149W	ARA1	2.88186	Large subunit of NADP+ dependent arabinose dehydrogenase, involved in carbohydrate metabolism; small subunit is unidentified
YFR015C	GSY1	2.58829	Glycogen synthase with similarity to Gsy2p, the more highly expressed yeast homolog; expression induced by glucose limitation, nitrogen starvation, environmental stress, and entry into stationary phase
YGR254W	ENO1	2.95263	Enolase I, a phosphopyruvate hydratase that catalyzes the conversion of 2-phosphoglycerate to phosphoenolpyruvate during glycolysis and the reverse reaction during gluconeogenesis; expression is repressed in response to glucose
YNL045W	non	2.5403	Leucyl aminopeptidase (leukotriene A4 hydrolase) with epoxide hydrolase activity, metalloenzyme containing one zinc atom; role in vivo is not defined; green fluorescent protein (GFP)-fusion protein localizes to the cytoplasm and nucleus
YGR008C	STF2	2.76255	Protein involved in regulation of the mitochondrial F1F0-ATP synthase; Stf1p and Stf2p act as stabilizing factors that enhance inhibitory action of the Inh1p protein
YPR172W	non	2.51054	Protein of unknown function, transcriptionally activated by Yrm1p along with genes involved in multidrug resistance
YBR188C	NTC20	2.63353	Member of a complex, including Prp19p, that binds to the spliceosome; required for pre-mRNA splicing
YAL061W	non	2.86394	putative polyol dehydrogenase
YNL121C	TOM70	2.93427	Component of the TOM (translocase of outer membrane) complex responsible for recognition and initial import steps for all mitochondrially directed proteins; acts as a receptor for incoming precursor proteins
YML100W	TSL1	2.51926	Large subunit of trehalose 6-phosphate synthase (Tps1p)/phosphatase (Tps2p) complex, which converts uridine-5'-diphosphoglucose and glucose 6-phosphate to trehalose, homologous to Tps3p and may share function
YPL262W	FUM1	3.14269	Fumarase, converts fumaric acid to L-malic acid in the TCA cycle; cytosolic and mitochondrial localization determined by the N-terminal mitochondrial targeting sequence and protein conformation
YER081W	SER3	10.5487	-phosphoglycerate dehydrogenase, catalyzes the first step in serine and glycine biosynthesis; isozyme of Ser33p
YML020W	non	3.19762	ORF, Uncharacterized
YOR374W	ALD4	2.74727	Mitochondrial aldehyde dehydrogenase, required for growth on ethanol and conversion of acetaldehyde to acetate; activity is K+ dependent; utilizes NADP+ or NAD+ equally as coenzymes; expression is glucose repressed
YMR196W	non	3.08228	Putative protein of unknown function; green fluorescent protein (GFP)-fusion protein localizes to the cytoplasm; YMR196W is not an essential gene
YDR148C	KGD2	2.56152	Dihydrolipoyl transsuccinylase, a component of the mitochondrial alpha-ketoglutarate dehydrogenase complex, which catalyzes a step in the tricarboxylic acid (TCA) cycle, the oxidative decarboxylation of alpha-ketoglutarate to succinyl-CoA
YLR069C	MEF1	2.57398	Mitochondrial elongation factor involved in translational elongation
YNL103W	MET4	2.50186	Lecine-zipper transcriptional activator, responsible for the regulation of the sulfur amino acid pathway, requires different combinations of the auxiliary factors Cbf1p, Met28p, Met31p and Met32p
YPL058C	PDR12	3.5603	Plasma membrane weak-acid-inducible ATP-binding cassette (ABC) transporter, required for weak organic acid resistance, strongly induced by sorbate and benzoate, regulated by War1p, mutants exhibit sorbate hypersensitivity
YDR354W	TRP4	2.89387	Anthranilate phosphoribosyl transferase of the tryptophan biosynthetic pathway, catalyzes the phosphoribosylation of anthranilate, subject to the general control system of amino acid biosynthesis
YBR115C	LYS2	2.9302	Alpha aminoadipate reductase, catalyzes the reduction of alpha-aminoadipate to alpha-aminoadipate 6-semialdehyde, which is the fifth step in biosynthesis of lysine; activation requires posttranslational phosphopantetheinylation by Lys5p
YAL044C	GCV3	2.76446	H subunit of the mitochondrial glycine decarboxylase complex, required for the catabolism of glycine to 5,10-methylene-THF; expression is regulated by levels of levels of 5,10-methylene-THF in the cytoplasm
YOL058W	ARG1	3.81584	Arginosuccinate synthetase, catalyzes the formation of L-argininosuccinate from citrulline and L-aspartate in the arginine biosynthesis pathway; potential Cdc28p substrate
Go enrichments
Process
GOID	GO_term	Cluster frequency	Background frequency	P-value	Gene(s) annotated to the term	Directly Annotated GOID List
19752	carboxylic acid metabolic process	12 out of 46 genes, 26.1%	310 out of 7288 background genes, 4.3%	8.88e-05	GCV3:ACH1:LYS2:KGD2:TRP4:SER3:ENO1:MET4:ARG1:PDR12:FUM1:ISA2	6826:53:32889:723:6103:6106:45944:96:46685:46686:9102:19878:6083:6084:6094:42493:162:6096:6526:6810:9070:19541:6099:6730:15849:6546:52
6082	organic acid metabolic process	12 out of 46 genes, 26.1%	310 out of 7288 background genes, 4.3%	8.88e-05	GCV3:ACH1:LYS2:KGD2:TRP4:SER3:ENO1:MET4:ARG1:PDR12:FUM1:ISA2	6826:53:32889:723:6103:6106:45944:96:46685:46686:9102:19878:6083:6084:6094:42493:162:6096:6526:6810:9070:19541:6099:6730:15849:6546:52
Component
GOID	GO_term	Cluster frequency	Background frequency	P-value	Gene(s) annotated to the term	Directly Annotated GOID List
44424	intracellular part	44 out of 46 genes, 95.7%	5054 out of 7288 background genes, 69.3%	0.00106	GCV3:BDH2:ACH1:LYS2:ARA1:NTC20:SHG1:MRPL37:RBK1:YDR063W:FMP16:KGD2:TRP4:HOR2:SER3:SPT2:HSP12:UBP6:GSY1:STF2:SMD1:ENO1:FMP12:YKL063C:YLR050C:MEF1:TMA10:TSL1:HOF1:YMR196W:MRPL33:YMR315W:YNL045W:MET4:TOM70:IFM1:ARG1:HSH49:ALD4:SGF11:FUM1:ISA2:MRPL51:YPR172W	5773:5838:9353:5758:5685:5960:5686:5783:5759:5946:5794:48188:5886:124:142:42645:243:5634:5741:5742:31307:5840:15:46540:5737:5753:5762:5681:5682:5739:5829
5622	intracellular	44 out of 46 genes, 95.7%	5089 out of 7288 background genes, 69.8%	0.0014	GCV3:BDH2:ACH1:LYS2:ARA1:NTC20:SHG1:MRPL37:RBK1:YDR063W:FMP16:KGD2:TRP4:HOR2:SER3:SPT2:HSP12:UBP6:GSY1:STF2:SMD1:ENO1:FMP12:YKL063C:YLR050C:MEF1:TMA10:TSL1:HOF1:YMR196W:MRPL33:YMR315W:YNL045W:MET4:TOM70:IFM1:ARG1:HSH49:ALD4:SGF11:FUM1:ISA2:MRPL51:YPR172W	5773:5838:9353:5758:5685:5960:5686:5783:5759:5946:5794:48188:5886:124:142:42645:243:5634:5741:5742:31307:5840:15:46540:5753:5737:5762:5681:5682:5739:5829
44464	cell part	45 out of 46 genes, 97.8%	5496 out of 7288 background genes, 75.4%	0.00364	GCV3:BDH2:ACH1:LYS2:ARA1:NTC20:SHG1:MRPL37:RBK1:YDR063W:FMP16:KGD2:TRP4:HOR2:SER3:SPT2:HSP12:UBP6:GSY1:STF2:SMD1:ENO1:FMP12:YKL063C:YLR050C:MEF1:TMA10:TSL1:HOF1:YMR196W:MRPL33:YMR315W:YNL045W:MET4:TOM70:IFM1:ARG1:HSH49:ALD4:SGF11:PDR12:FUM1:ISA2:MRPL51:YPR172W	5773:5838:9353:5758:5685:5960:5686:5783:5759:5946:5794:48188:5886:124:142:42645:243:5634:5741:5742:31307:5840:15:46540:5753:5737:5762:5681:5682:5739:5829
5623	cell	45 out of 46 genes, 97.8%	5497 out of 7288 background genes, 75.4%	0.00367	GCV3:BDH2:ACH1:LYS2:ARA1:NTC20:SHG1:MRPL37:RBK1:YDR063W:FMP16:KGD2:TRP4:HOR2:SER3:SPT2:HSP12:UBP6:GSY1:STF2:SMD1:ENO1:FMP12:YKL063C:YLR050C:MEF1:TMA10:TSL1:HOF1:YMR196W:MRPL33:YMR315W:YNL045W:MET4:TOM70:IFM1:ARG1:HSH49:ALD4:SGF11:PDR12:FUM1:ISA2:MRPL51:YPR172W	5773:5838:9353:5758:5685:5960:5686:5783:5759:5946:5794:48188:5886:124:142:42645:243:5634:5741:5742:31307:5840:15:46540:5753:5737:5762:5681:5682:5739:5829
43227	membrane-bound organelle	36 out of 46 genes, 78.3%	3674 out of 7288 background genes, 50.4%	0.00957	GCV3:BDH2:ACH1:NTC20:SHG1:MRPL37:RBK1:YDR063W:FMP16:KGD2:TRP4:HOR2:SPT2:HSP12:GSY1:STF2:SMD1:ENO1:FMP12:YKL063C:YLR050C:MEF1:TMA10:MRPL33:YMR315W:YNL045W:MET4:TOM70:IFM1:HSH49:ALD4:SGF11:FUM1:ISA2:MRPL51:YPR172W	5773:9353:5758:5685:5960:5686:5783:5759:5794:48188:5886:124:42645:243:5634:5741:5742:31307:5840:15:46540:5753:5737:5762:5681:5682:5739:5829
43231	intracellular membrane-bound organelle	36 out of 46 genes, 78.3%	3674 out of 7288 background genes, 50.4%	0.00957	GCV3:BDH2:ACH1:NTC20:SHG1:MRPL37:RBK1:YDR063W:FMP16:KGD2:TRP4:HOR2:SPT2:HSP12:GSY1:STF2:SMD1:ENO1:FMP12:YKL063C:YLR050C:MEF1:TMA10:MRPL33:YMR315W:YNL045W:MET4:TOM70:IFM1:HSH49:ALD4:SGF11:FUM1:ISA2:MRPL51:YPR172W	5773:9353:5758:5685:5960:5686:5783:5759:5794:48188:5886:124:42645:243:5634:5741:5742:31307:5840:15:46540:5753:5737:5762:5681:5682:5739:5829
