# Supplementary material for: Determinants of Protein Abundance and Translation Efficiency in S. cerevisiae
Source: PLoS Comput Biol. 2007 Dec 21;3(12):e248. doi: 10.1371/journal.pcbi.0030248 (PMC2230678; doi:10.1371/journal.pcbi.0030248)
Supplement: Table S10 — Table includes the ORF, name, RTE, and description of each gene. Genes that are related to regulation are marked in blue. GO enrichments according to SGD for this group of genes appear below. (29 KB XLS) [file pcbi.0030248.st010.xls]

## Sheet: p_m_of_lowextream_ratio
Table S8: Genes with RTE < 0.45; the table includes the ORF, name, RTE, and description of each gene. Genes that are related to regulation are marked in blue.
GO enrichments according to SGD for this group of genes appear below.
ORF	Name	RTE
YFL004W	VTC2	0.391206	Vacuolar membrane protein involved in vacuolar polyphosphate accumulation; functions as a regulator of vacuolar H+-ATPase activity and vacuolar transporter chaperones; involved in protein localization and non-autophagic vacuolar fusion
YGR234W	YHB1	0.303549	Nitric oxide oxidoreductase, flavohemoglobin involved in nitric oxide detoxification; plays a role in the oxidative and nitrosative stress responses
YOR212W	STE4	0.43952	G protein beta subunit, forms a dimer with Ste18p to activate the mating signaling pathway, forms a heterotrimer with Gpa1p and Ste18p to dampen signaling; may recruit Rho1p to the polarized growth site during mating; contains WD40 repeats
YJL033W	HCA4	0.424548	Putative nucleolar DEAD box RNA helicase; high-copy number suppression of a U14 snoRNA processing mutant suggests an involvement in 18S rRNA synthesis
YMR276W	DSK2	0.448755	Nuclear-enriched ubiquitin-like polyubiquitin-binding protein, required for spindle pole body (SPB) duplication and for transit through the G2/M phase of the cell cycle, involved in proteolysis, interacts with the proteasome
YOL057W	non	0.428985	Putative metalloprotease
YBR023C	CHS3	0.433769	Chitin synthase III, catalyzes the transfer of N-acetylglucosamine (GlcNAc) to chitin; required for synthesis of the majority of cell wall chitin, the chitin ring during bud emergence, and spore wall chitosan
YOR153W	PDR5	0.315782	Short-lived membrane ABC (ATP-binding cassette) transporter, actively exports various drugs, expression regulated by Pdr1p; also involved in steroid transport, cation resistance, and cellular detoxification during exponential growth
YJL001W	PRE3	0.307147	20S proteasome beta-type subunit, responsible for cleavage after acidic residues in peptides
YGR014W	MSB2	0.395569	Mucin family member at the head of the Cdc42p- and MAP kinase-dependent filamentous growth signaling pathway; also functions as an osmosensor in parallel to the Sho1p-mediated pathway; potential Cdc28p substrate
YPL106C	SSE1	0.35824	ATPase that is a component of the heat shock protein Hsp90 chaperone complex; binds unfolded proteins; member of the heat shock protein 70 (HSP70) family; localized to the cytoplasm
YBL068W	PRS4	0.443191	5-phospho-ribosyl-1(alpha)-pyrophosphate synthetase, involved in nucleotide, histidine, and tryptophan biosynthesis; one of a five related enzymes, which are active as heteromultimeric complexes
YPL093W	NOG1	0.442577	Putative GTPase that associates with free 60S ribosomal subunits in the nucleolus and is required for 60S ribosomal subunit biogenesis; constituent of 66S pre-ribosomal particles; member of the ODN family of nucleolar G-proteins
YNL282W	POP3	0.312732	Subunit of both RNase MRP, which cleaves pre-rRNA, and nuclear RNase P, which cleaves tRNA precursors to generate mature 5' ends
YER008C	SEC3	0.380508	Non-essential subunit of the exocyst complex (Sec3p, Sec5p, Sec6p, Sec8p, Sec10p, Sec15p, Exo70p, Exo84p) which mediates targeting of post-Golgi vesicles to sites of active exocytosis; Sec3p specifically is a spatial landmark for secretion
YLL034C	RIX7	0.418413	Putative ATPase of the AAA family, required for export of pre-ribosomal large subunits from the nucleus; distributed between the nucleolus, nucleoplasm, and nuclear periphery depending on growth conditions
YDR177W	UBC1	0.407254	Ubiquitin-conjugating enzyme that mediates selective degradation of short-lived and abnormal proteins; plays a role in vesicle biogenesis and ER-associated protein degradation (ERAD); component of the cellular stress response
YOR160W	MTR10	0.397217	Nuclear import receptor, mediates the nuclear localization of proteins involved in mRNA-nucleus export; promotes dissociation of mRNAs from the nucleus-cytoplasm mRNA shuttling protein Npl3p
YMR243C	ZRC1	0.43407	Vacuolar membrane zinc transporter, transports zinc from the cytosol into the vacuole for storage; also has a role in resistance to zinc shock resulting from a sudden influx of zinc into the cytoplasm
YJL186W	MNN5	0.434974	Alpha-1,2-mannosyltransferase, responsible for addition of the second alpha-1,2-linked mannose of the branches on the mannan backbone of oligosaccharides, localizes to an early Golgi compartment
YHR200W	RPN10	0.342458	Non-ATPase base subunit of the 19S regulatory particle (RP) of the 26S proteasome; N-terminus plays a role in maintaining the structural integrity of the RP; binds selectively to polyubiquitin chains; homolog of the mammalian S5a protein
YDL128W	VCX1	0.423666	Vacuolar H+/Ca2+ exchanger involved in control of cytosolic Ca2+ concentration; has similarity to sodium/calcium exchangers, including the bovine Na+/Ca2+,K+ antiporter
YGR281W	YOR1	0.305237	Plasma membrane transporter of the ATP-binding cassette (ABC) family, mediates export of many different organic anions including oligomycin
YBR207W	FTH1	0.371388	Putative high affinity iron transporter involved in transport of intravacuolar stores of iron; forms complex with Fet5p; expression is regulated by iron; proposed to play indirect role in endocytosis
YBR162C	TOS1	0.39202	Covalently-bound cell wall protein of unknown function; identified as a cell cycle regulated SBF target gene; deletion mutants are highly resistant to treatment with beta-1,3-glucanase; has sequence similarity to YJL171C
YMR128W	ECM16	0.370103	Essential DEAH-box ATP-dependent RNA helicase specific to the U3 snoRNP, predominantly nucleolar in distribution, required for 18S rRNA synthesis
YOR207C	RET1	0.441964	Second-largest subunit of RNA polymerase III, which is responsible for the transcription of tRNA and 5S RNA genes, and other low molecular weight RNAs
YGR128C	UTP8	0.393927	Nucleolar protein required for export of tRNAs from the nucleus; also copurifies with the small subunit (SSU) processome containing the U3 snoRNA that is involved in processing of pre-18S rRNA
YDL185W	TFP1	0.406126	binding sites; protein precursor undergoes self-catalyzed splicing to yield the extein Tfp1p and the intein Vde (PI-SceI), which is a site-specific endonuclease
YJR048W	CYC1	0.348203	Cytochrome c, isoform 1; electron carrier of the mitochondrial intermembrane space that transfers electrons from ubiquinone-cytochrome c oxidoreductase to cytochrome c oxidase during cellular respiration
YGR279C	SCW4	0.353064	Cell wall protein with similarity to glucanases; scw4 scw10 double mutants exhibit defects in mating
YBL024W	NCL1	0.359983	S-adenosyl-L-methionine-dependent tRNA: m5C-methyltransferase, methylates cytosine to m5C at several positions in tRNAs and intron-containing pre-tRNAs; similar to Nop2p and human proliferation associated nucleolar protein p120
YJL079C	PRY1	0.436484	Protein of unknown function, has similarity to Pry2p and Pry3p and to the plant PR-1 class of pathogen related proteins
YEL055C	POL5	0.339151	Protein with sequence similarity to the human MybBP1A and weak sequence similar to B-type DNA polymerases, not required for chromosomal DNA replication; required for the synthesis of rRNA
YOR151C	RPB2	0.421908	RNA polymerase II second largest subunit B150, part of central core; similar to bacterial beta subunit
YDR077W	SED1	0.416099	Major stress-induced structural GPI-cell wall glycoprotein in stationary-phase cells, associates with translating ribosomes, possible role in mitochondrial genome maintenance; ORF contains two distinct variable minisatellites
YKL068W	NUP100	0.393927	Subunit of the nuclear pore complex (NPC) that is localized to both sides of the pore; contains a repetitive GLFG motif that interacts with mRNA export factor Mex67p and with karyopherin Kap95p; homologous to Nup116p
YPL178W	CBC2	0.436484	Small subunit of the heterodimeric cap binding complex that also contains Sto1p, component of the spliceosomal commitment complex; interacts with Npl3p, possibly to package mRNA for export from the nucleus; contains an RNA-binding motif
YKL164C	PIR1	0.217789	O-glycosylated protein required for cell wall stability; attached to the cell wall via beta-1,3-glucan; mediates mitochondrial translocation of Apn1p; expression regulated by the cell integrity pathway and by Swi5p during the cell cycle
YDR165W	TRM82	0.350382	Subunit of a tRNA methyltransferase complex composed of Trm8p and Trm82p that catalyzes 7-methylguanosine modification of tRNA
YBL016W	FUS3	0.368823	Mitogen-activated protein kinase involved in mating pheromone response; activated by phosphorylation by Ste7p; provides specificity during the mating vs. filamentous growth response by phosphorylating transcriptional and cytoplasmic targets
YMR229C	RRP5	0.317318	Protein required for the synthesis of both 18S and 5.8S rRNA; C-terminal region is crucial for the formation of 18S rRNA and N-terminal region is required for the 5.8S rRNA; component of small ribosomal subunit (SSU) processosome
YNR016C	ACC1	0.436786	Acetyl-CoA carboxylase, biotin containing enzyme that catalyzes the carboxylation of acetyl-CoA to form malonyl-CoA; required for de novo biosynthesis of long-chain fatty acids
YCL028W	RNQ1	0.442577	[PIN(+)] prion, an infectious protein conformation that is generally an ordered protein aggregate
YBR287W	ZSP1	0.293615	Protein of unknown function; mutation results in a zinc sensitive phenotype
YGR090W	UTP22	0.346758	Possible U3 snoRNP protein involved in maturation of pre-18S rRNA, based on computational analysis of large-scale protein-protein interaction data
YDR461W	MFA1	0.292803	Mating pheromone a-factor, made by a cells; interacts with alpha cells to induce cell cycle arrest and other responses leading to mating; biogenesis involves C-terminal modification, N-terminal proteolysis, and export; also encoded by MFA2
YOR133W	EFT1	0.21479	Elongation factor 2 (EF-2), also encoded by EFT2; catalyzes ribosomal translocation during protein synthesis; contains diphthamide, the unique posttranslationally modified histidine residue specifically ADP-ribosylated by diphtheria toxin
YBR067C	TIP1	0.310142	Major cell wall mannoprotein with possible lipase activity; transcription is induced by heat- and cold-shock; member of the Srp1p/Tip1p family of serine-alanine-rich proteins
YPL195W	APL5	0.099373	Delta adaptin-like subunit of the clathrin associated protein complex (AP-3); functions in transport of alkaline phosphatase to the vacuole via the alternate pathway, suppressor of loss of casein kinase 1 function
Go enrichments
Process
GOID	GO_term	Cluster frequency	Background frequency	P-value	Gene(s) annotated to the term	Directly Annotated GOID List
16043	cellular component organization and biogenesis	31 out of 50 genes, 62.0%	2186 out of 7288 background genes, 30.0%	0.00095	FUS3:NCL1:PRS4:CHS3:TIP1:FTH1:TFP1:SED1:TRM82:UBC1:SEC3:VTC2:MSB2:UTP22:UTP8:YOR1:HCA4:NUP100:PIR1:RIX7:ECM16:RRP5:DSK2:POP3:ACC1:MTR10:STE4:NOG1:SSE1:CBC2:APL5	750:30468:398:105:6403:6404:6406:6407:6408:6513:6409:30433:6379:723:30476:7103:42273:6886:7035:6887:6166:2:6998:6999:42493:6810:1402:6633:1403:6457:42026:42787:910:54:55:30488:6207:6893:16192:6314:6896:6897:7047:31684:162:6606:6607:6608:6609:6468:19538:16050:6827:42144:30490:6970:42254:7121:6038:7050:8104:8033:9847:6610:209:6611:6364:6365:6189:6904:6906
42254	ribosome biogenesis and assembly	11 out of 50 genes, 22.0%	330 out of 7288 background genes, 4.5%	0.00385	NCL1:PRS4:TRM82:UTP22:UTP8:HCA4:RIX7:ECM16:RRP5:POP3:NOG1	105:6379:42273:6166:54:55:6207:30488:162:30490:42254:8033:6364:6365:6189
Component
GOID	GO_term	Cluster frequency	Background frequency	P-value	Gene(s) annotated to the term	Directly Annotated GOID List
44464	cell part	50 out of 50 genes, 100.0%	5496 out of 7288 background genes, 75.4%	8.66e-05	FUS3:NCL1:PRS4:CHS3:TIP1:TOS1:FTH1:ZSP1:RNQ1:VCX1:TFP1:SED1:TRM82:UBC1:MFA1:POL5:SEC3:VTC2:MSB2:UTP22:UTP8:YHB1:SCW4:YOR1:RPN10:PRE3:HCA4:PRY1:MNN5:CYC1:NUP100:PIR1:RIX7:ECM16:RRP5:ZRC1:DSK2:POP3:ACC1:YOL057W:EFT1:RPB2:PDR5:MTR10:RET1:STE4:NOG1:SSE1:CBC2:APL5	5783:9277:5789:43332:45009:30123:30687:145:5730:324:502:5625:5643:5732:5628:329:5840:5737:5665:5576:5666:5739:5934:5829:5846:5935:5774:5758:5937:5759:5794:5886:19774:5887:131:221:243:5634:172:5635:5655:5834:8540:30427
5623	cell	50 out of 50 genes, 100.0%	5497 out of 7288 background genes, 75.4%	8.74e-05	FUS3:NCL1:PRS4:CHS3:TIP1:TOS1:FTH1:ZSP1:RNQ1:VCX1:TFP1:SED1:TRM82:UBC1:MFA1:POL5:SEC3:VTC2:MSB2:UTP22:UTP8:YHB1:SCW4:YOR1:RPN10:PRE3:HCA4:PRY1:MNN5:CYC1:NUP100:PIR1:RIX7:ECM16:RRP5:ZRC1:DSK2:POP3:ACC1:YOL057W:EFT1:RPB2:PDR5:MTR10:RET1:STE4:NOG1:SSE1:CBC2:APL5	5783:9277:5789:43332:45009:30123:30687:145:5730:5625:502:324:5643:5732:5628:5840:329:5737:5665:5576:5666:5739:5934:5829:5846:5935:5758:5774:5937:5759:5794:19774:5886:5887:131:221:243:5634:172:5635:5655:5834:8540:30427
