# Supplementary material for: Determinants of Protein Abundance and Translation Efficiency in S. cerevisiae
Source: PLoS Comput Biol. 2007 Dec 21;3(12):e248. doi: 10.1371/journal.pcbi.0030248 (PMC2230678; doi:10.1371/journal.pcbi.0030248)
Supplement: Table S11 — Subset of genes that exhibit counteracting regulatory trends at the transcriptional versus the translational levels. Each gene in the set has RTE < 1/1.5 and mSD/mYEPD > 1.5. For each gene, the table includes its ORF ID, name, RTE, and the ratio between the mRNA levels in SD and YEPD. (11 KB XLS) [file pcbi.0030248.st011.xls]

## Sheet: extream_ratio2
Table S9: Subset of genes that exhibit counteracting regulatory trends at the transcriptional
vs the translational levels. Each gene in the set has RTE < 1/1.5 and mSD/mYEPD > 1.5.
For each gene the table includes its ORF name, name, RTE, and the ratio between the mRNA levels
in SD and YEPD.
ORF	Name	[(p/m)SD] /[ (p/m)YEPD] = RTE	mSD/mYEPD
YEL047C	non	0.621575	1.58337
YPL265W	DIP5	0.555169	1.58997
YBR245C	ISW1	0.529242	1.54542
YBR241C	non	0.576343	1.70055
YIL128W	MET18	0.509446	1.5042
YDR502C	SAM2	0.618566	1.8391
YMR261C	TPS3	0.590496	1.80375
YHL020C	OPI1	0.546389	1.70055
YKL213C	DOA1	0.586011	1.91189
YGR061C	ADE6	0.575944	1.89211
YPR035W	GLN1	0.623301	2.0648
YPR065W	ROX1	0.451876	1.50316
YKL064W	MNR2	0.595841	2.0209
YJL079C	PRY1	0.436484	1.51047
YOR151C	RPB2	0.421908	1.51467
YDR077W	SED1	0.416099	1.52732
YGR202C	PCT1	0.55787	2.06194
YGR240C	PFK1	0.4938	1.85189
YJR077C	MIR1	0.477311	1.82134
YLR153C	ACS2	0.473685	1.82134
YJL130C	URA2	0.467164	1.83528
YKL068W	NUP100	0.393927	1.57571
YPL178W	CBC2	0.436484	1.81756
YDR165W	TRM82	0.350382	1.51782
YBL016W	FUS3	0.368823	1.5977
YGL077C	HNM1	0.595428	2.73967
YNR016C	ACC1	0.436786	2.08349
YCL028W	RNQ1	0.442577	2.12874
YEL071W	DLD3	0.646176	3.13182
YGR090W	UTP22	0.346758	1.78139
YDR461W	MFA1	0.292803	1.62225
YER091C	MET6	0.471392	2.74537
YOR133W	EFT1	0.21479	1.63014
YBR067C	TIP1	0.310142	2.35708
YLR130C	ZRT2	0.20547	2.247
YPL195W	APL5	0.099373	5.56353
