# Supplementary material for: Determinants of Protein Abundance and Translation Efficiency in S. cerevisiae
Source: PLoS Comput Biol. 2007 Dec 21;3(12):e248. doi: 10.1371/journal.pcbi.0030248 (PMC2230678; doi:10.1371/journal.pcbi.0030248)
Supplement: Table S12 — Subset of genes that exhibit counteracting regulatory trends at the transcriptional versus the translational levels. Each gene in the set has RTE > 1/1.5 and mSD/mYEPD < 1.5. For each gene, the table includes its ORF ID, name, RTE, and the ratio between the mRNA levels. (32 KB XLS) [file pcbi.0030248.st012.xls]

## Sheet: extream_ratio1
Table S10: Subset of genes that exhibit counteracting regulatory trends at the transcriptional
vs the translational levels. Each gene in the set has RTE > 1/1.5 and mSD/mYEPD < 1.5.
For each gene the table includes its ORF name, name, RTE, and the ratio between the mRNA levels
ORF	Name	[(p/m)SD] /[ (p/m)YEPD] = RTE	mSD/mYEPD	Description.
YMR011W	HXT2	2.09217	0.105843	High-affinity glucose transporter of the major facilitator superfamily, expression is induced by low levels of glucose and repressed by high levels of glucose
YLR327C	TMA10	3.91768	0.50874	Protein of unknown function that associates with ribosomes
YLR050C	non	3.5801	0.535887	Putative protein of unknown function; green fluorescent protein (GFP)-fusion protein localizes to the endoplasmic reticulum; YLR050C is not an essential gene (1, 2)
YDL083C	RPS16B	2.40327	0.436786	Protein component of the small (40S) ribosomal subunit; identical to Rps16Ap and has similarity to E. coli S9 and rat S16 ribosomal proteins (1)
YBR258C	SHG1	3.30122	0.61132	Subunit of the COMPASS (Set1C) complex, which methylates histone H3 on lysine 4 and is required in transcriptional silencing near telomeres (1, 2)
YGR074W	SMD1	2.97729	0.578344	Core Sm protein Sm D1; part of heteroheptameric complex (with Smb1p, Smd2p, Smd3p, Sme1p, Smx3p, and Smx2p) that is part of the spliceosomal U1, U2, U4, and U5 snRNPs; homolog of human Sm D1
YBR268W	MRPL37	3.06312	0.612593	Mitochondrial ribosomal protein of the large subunit
YNR022C	MRPL50	2.54736	0.550571	Mitochondrial ribosomal protein of the large subunit, not essential for mitochondrial translation
YER062C	HOR2	2.68142	0.582367	One of two redundant DL-glycerol-3-phosphatases (RHR2/GPP1 encodes the other) involved in glycerol biosynthesis; induced in response to hyperosmotic stress and oxidative stress, and during the diauxic transition
YPL010W	RET3	2.31659	0.515842	Zeta subunit of the coatomer complex (COPI), which coats Golgi-derived transport vesicles; involved in retrograde transport between Golgi and E
YFR010W	UBP6	2.89387	0.649319	Ubiquitin-specific protease situated in the base subcomplex of the 26S proteasome, releases free ubiquitin from branched polyubiquitin chains; deletion causes hypersensitivity to cycloheximide and other toxic compounds
YKL192C	ACP1	2.45037	0.554016	Mitochondrial matrix acyl carrier protein, involved in biosynthesis of octanoate, which is a precursor to lipoic acid; activated by phosphopantetheinylation catalyzed by Ppt2p
YDR040C	ENA1	2.5403	0.582367	P-type ATPase sodium pump, involved in Na+ and Li+ efflux to allow salt tolerance
YNL070W	TOM7	2.42334	0.556711	Component of the TOM (translocase of outer membrane) complex responsible for recognition and initial import steps for all mitochondrially directed proteins; promotes assembly and stability of the TOM complex
YGL068W	MNP1	2.23457	0.528509	Protein associated with the mitochondrial nucleoid; putative mitochondrial ribosomal protein with similarity to E. coli L7/L12 ribosomal protein; required for normal respiratory growth
YPR110C	RPC40	1.90396	0.479965	RNA polymerase subunit, common to RNA polymerase I and III
YLR367W	RPS22B	1.86736	0.473029	Protein component of the small (40S) ribosomal subunit; nearly identical to Rps22Ap and has similarity to E. coli S8 and rat S15a ribosomal proteins
YLR325C	RPL38	1.67249	0.42396	Protein component of the large (60S) ribosomal subunit, has similarity to rat L38 ribosomal protein
YER067W	non	2.28311	0.595016	Putative protein of unknown function; green fluorescent protein (GFP)-fusion protein localizes to the cytoplasm and nucleus; YER067W is not an essential gene
YPR108W	RPN7	1.95884	0.510506	Essential, non-ATPase regulatory subunit of the 26S proteasome, similar to another S. cerevisiae regulatory subunit, Rpn5p, as well as to mammalian proteasome subunits
YLR250W	SSP120	2.20687	0.577943	Protein of unknown function; green fluorescent protein (GFP)-fusion protein localizes to the cytoplasm in a punctate pattern
YDR343C	HXT6	1.84038	0.496891	High-affinity glucose transporter of the major facilitator superfamily, nearly identical to Hxt7p, expressed at high basal levels relative to other HXTs, repression of expression by high glucose requires SNF3
YLR264W	RPS28B	1.63014	0.455335	Protein component of the small (40S) ribosomal subunit; nearly identical to Rps28Ap and has similarity to rat S28 ribosomal protein
YOR285W	non	1.86607	0.525222	Protein of unknown function, localized to the mitochondrial outer membrane
YLR017W	MEU1	2.09217	0.599986	Methylthioadenosine phosphorylase (MTAP), catalyzes the initial step in the methionine salvage pathway; affects polyamine biosynthesis through regulation of ornithine decarboxylase (Spe1p) activity; regulates ADH2 gene expression
YJL136C	RPS21B	1.76174	0.505576	Protein component of the small (40S) ribosomal subunit; nearly identical to Rps21Bp and has similarity to rat S21 ribosomal protein
YLR218C	non	2.13022	0.621575	Putative protein of unknown function; green fluorescent protein (GFP)-fusion protein localizes to the cytoplasm; YLR218C is not essential; mutants exhibit glycogen storage defects and growth defects on a non-fermentable carbon source
YDR519W	FPR2	1.85832	0.548666	Membrane-bound peptidyl-prolyl cis-trans isomerase (PPIase), binds to the drugs FK506 and rapamycin; expression pattern suggests possible involvement in ER protein trafficking
YLR388W	RPS29A	1.72548	0.512989	Protein component of the small (40S) ribosomal subunit; nearly identical to Rps29Bp and has similarity to rat S29 and E. coli S14 ribosomal proteins
YDR245W	MNN10	2.02371	0.602904	Subunit of a Golgi mannosyltransferase complex also containing Anp1p, Mnn9p, Mnn11p, and Hoc1p that mediates elongation of the polysaccharide mannan backbone; membrane protein of the mannosyltransferase family
YHR047C	AAP1	1.63921	0.489032	Arginine/alanine aminopeptidase, overproduction stimulates glycogen accumulation
YLR048W	RPS0B	1.69819	0.515127	Protein component of the small (40S) ribosomal subunit, nearly identical to Rps0Ap; required for maturation of 18S rRNA along with Rps0Ap; deletion of either RPS0 gene reduces growth rate, deletion of both genes is lethal
YMR074C	non	1.967	0.598324	Putative protein of unknown function; green fluorescent protein (GFP)-fusion protein localizes to the nucleus and cytoplasm; YMR074C is not an essential gene
YOR253W	NAT5	1.78015	0.550571	Subunit of the N-terminal acetyltransferase NatA (Nat1p, Ard1p, Nat5p); N-terminally acetylates many proteins, which influences multiple processes such as the cell cycle, heat-shock resistance, mating, sporulation, and telomeric silencing
YOR286W	FMP31	1.82134	0.575944	Putative protein of unknown function; the authentic, non-tagged protein is detected in highly purified mitochondria in high-throughput studies
YOR163W	DDP1	1.51572	0.48063	Diadenosine polyphosphate hydrolase, member of the MutT family of nucleotide hydrolases with high specificity for diadenosine hexa- and pentaphosphates, required for efficient hydrolysis of diphosphorylated inositol polyphosphates
YKL180W	RPL17A	1.51362	0.487678	Protein component of the large (60S) ribosomal subunit, nearly identical to Rpl17Bp and has similarity to E. coli L22 and rat L17 ribosomal proteins; copurifies with the Dam1 complex (aka DASH complex)
YLR064W	non	1.73989	0.56175	Putative protein of unknown function; green fluorescent protein (GFP)-fusion protein localizes to the endoplasmic reticulum; YLR064W is not an essential gene
YPL211W	NIP7	1.54971	0.510152	Nucleolar protein required for 60S ribosome subunit biogenesis, constituent of 66S pre-ribosomal particles; physically interacts with Nop8p and the exosome subunit Rrp43p
YNL153C	GIM3	1.94531	0.641268	Subunit of the heterohexameric cochaperone prefoldin complex which binds specifically to cytosolic chaperonin and transfers target proteins to it
YNL301C	RPL18B	1.67133	0.553632	Protein component of the large (60S) ribosomal subunit, identical to Rpl18Ap and has similarity to rat L18 ribosomal protein
YPR128C	ANT1	1.94127	0.643049	Peroxisomal adenine nucleotide transporter; involved in beta-oxidation of medium-chain fatty acid; required for peroxisome proliferation
YOR265W	RBL2	1.70173	0.569197	Protein involved in microtubule morphogenesis, required for protection from excess free beta-tubulin; proposed to be involved the folding of beta-tubulin
YPR028W	YOP1	1.54757	0.522318	Membrane protein that interacts with Yip1p to mediate membrane traffic; overexpression results in cell death and accumulation of internal cell membranes; regulates vesicular traffic in stressed cells
YNL149C	PGA2	1.53475	0.51907	Essential protein required for maturation of Gas1p and Pho8p; involved in protein trafficking; GFP-fusion protein localizes to the ER and YFP-fusion protein to the nuclear envelope-ER network; null mutants have a cell separation defect
YOR158W	PET123	1.73267	0.591726	Mitochondrial ribosomal protein of the small subunit; PET123 exhibits genetic interactions with PET122, which encodes a COX3 mRNA-specific translational activator
YKL138C	MRPL31	1.77768	0.609205	Mitochondrial ribosomal protein of the large subunit
YOL012C	HTZ1	1.62563	0.566049	Histone variant H2AZ, exchanged for histone H2A in nucleosomes by the SWR1 complex; involved in transcriptional regulation through prevention of the spread of silent heterochromatin
YER112W	LSM4	1.69584	0.595016	Lsm (Like Sm) protein; part of heteroheptameric complexes (Lsm2p-7p and either Lsm1p or 8p): cytoplasmic Lsm1p complex involved in mRNA decay; nuclear Lsm8p complex part of U6 snRNP and possibly involved in processing tRNA, snoRNA, and rRNA
YDR503C	LPP1	1.87125	0.666649	Lipid phosphate phosphatase, catalyzes Mg(2+)-independent dephosphorylation of phosphatidic acid (PA), lysophosphatidic acid, and diacylglycerol pyrophosphate; involved in control of the cellular levels of phosphatidylinositol and PA
YMR188C	MRPS17	1.73989	0.622006	Mitochondrial ribosomal protein of the small subunit (1)
YFR001W	LOC1	1.64148	0.60794	Nuclear protein involved in asymmetric localization of ASH1 mRNA; binds double-stranded RNA in vitro; constituent of 66S pre-ribosomal particles
YKL160W	ELF1	1.71713	0.636397	Transcription elongation factor that contains a conserved zinc finger domain; implicated in the maintenance of proper chromatin structure in actively transcribed regions; deletion inhibits Brome mosaic virus (BMV) gene expression
YBR252W	DUT1	1.59218	0.59791	dUTPase, catalyzes hydrolysis of dUTP to dUMP and PPi, thereby preventing incorporation of uracil into DNA during replication; critical for the maintenance of genetic stability
YJL096W	MRPL49	1.57789	0.595841	Mitochondrial ribosomal protein of the large subunit
YOR004W	UTP23	1.63807	0.621144	Essential nucleolar protein that is a component of the SSU (small subunit) processome involved in 40S ribosomal subunit biogenesis; has homology to PINc domain protein Fcf1p, although the PINc domain of Utp23p is not required for function
YKL128C	PMU1	1.74957	0.663883	Putative phosphomutase, contains a region homologous to the active site of phsophomutases; overexpression of the gene suppresses the histidine auxotrophy of an ade3 ade16 ade17 triple mutant and the temperature sensitivity of a tps2 mutant
YPR017C	DSS4	1.7219	0.656561	Nucleotide release factor functioning in the post-Golgi secretory pathway, required for ER-to-Golgi transport, binds zinc, found both on membranes and in the cytosol; guanine nucleotide dissociation stimulator
YNL138W	SRV2	1.73147	0.661586	CAP (cyclase-associated protein) subunit of adenylyl cyclase complex; N-terminus binds adenylyl cyclase and facilitates activation by RAS; C-terminus binds ADP-actin monomers, facilitating regulation of actin dynamics and cell morphogenesis
YLR370C	ARC18	1.60659	0.621575	Subunit of the ARP2/3 complex, which is required for the motility and integrity of cortical actin patches
YMR260C	TIF11	1.51887	0.599155	Translation initiation factor eIF1A, essential protein that forms a complex with Sui1p (eIF1) and the 40S ribosomal subunit and scans for the start codon; C-terminus associates with Fun12p (eIF5B); N terminus interacts with eIF2 and eIF3
YLR216C	CPR6	1.53794	0.607097	Peptidyl-prolyl cis-trans isomerase (cyclophilin), catalyzes the cis-trans isomerization of peptide bonds N-terminal to proline residues; binds to Hsp82p and contributes to chaperone activity
YDR453C	TSA2	1.54757	0.626332	Stress inducible cytoplasmic thioredoxin peroxidase; cooperates with Tsa1p in the removal of reactive oxygen, nitrogen and sulfur species using thioredoxin as hydrogen donor; deletion enhances the mutator phenotype of tsa1 mutants
YDR012W	RPL4B	1.59438	0.653836	Protein component of the large (60S) ribosomal subunit, nearly identical to Rpl4Ap and has similarity to E. coli L4 and rat L4 ribosomal proteins (1, 2)
YDL072C	YET3	1.5042	0.624165	Protein of unknown function; YET3 null mutant decreases the level of secreted invertase; homolog of human BAP31 protein
YNL143C	non	1.54221	0.641713	Hypothetical protein
YLR043C	TRX1	1.50525	0.628942	Cytoplasmic thioredoxin isoenzyme of the thioredoxin system which protects cells against both oxidative and reductive stress, forms LMA1 complex with Pbi2p, acts as a cofactor for Tsa1p, required for ER-Golgi transport and vacuole inheritance
YKR006C	MRPL13	1.57353	0.663423	Mitochondrial ribosomal protein of the large subunit, not essential for mitochondrial translation
YGR180C	RNR4	1.51047	0.648869	Ribonucleotide-diphosphate reductase (RNR), small subunit; the RNR complex catalyzes the rate-limiting step in dNTP synthesis and is regulated by DNA replication and DNA damage checkpoint pathways via localization of the small subunits
