# Supplementary material for: Determinants of Protein Abundance and Translation Efficiency in S. cerevisiae
Source: PLoS Comput Biol. 2007 Dec 21;3(12):e248. doi: 10.1371/journal.pcbi.0030248 (PMC2230678; doi:10.1371/journal.pcbi.0030248)
Supplement: Table S13 — (A) The RTE of the genes that were reported by Lu et al. as genes with high TE. The table includes the name, ORF, and RTE of each gene. (B) The RTE of the 14 genes with extreme TE; in this case, the TE was calculated using the protein abundance of Ghaemmaghami et al. [2] and the mRNA levels of Holstege et al. [15] The table includes the name, ORF ID, RTE, TE, and TE rank (among all the genes) of each gene. (12 KB XLS) [file pcbi.0030248.st013.xls]

## Sheet: Sheet1
Table S11 A: The RTE of the genes that were reported by Lu et al. as genes with high TE.
The table includes the name, ORF, and RTE of each gene.
						Gene name	ORF	RTE
						ADH2	YMR303C	non
						ALD6	YPL061W	0.948684
						ILV5	YLR355C	non
						MET6	YER091C	0.471392
						LYS1	YIR034C	1.38032
						BMH2	YDR099W	1.38319
						RPS21A	YKR057W	1.17691
						APE3	YBR286W	non
						TOM1	YDR457W	non
						TOS4	YLR183C	non
						YLR422W	YLR422W	non
						SPO14	YKR031C	1.22689
						PMT4	YJR143C	non
						YCF1	YDR135C	0.934327
						YKR089C	YKR089C	non
						TIF34	YMR146C	non
Table S11 B: The RTE of the 14 genes with extreme TE ; in
this case the TE was calculated using the protein aboundance of Ghaemmaghami et al.
and the mRNA levels of Holstege et al.
The table includes the name, ORF, RTE, TE, and TE rank (among all the genes) of each gene.						Gene name	ORF	RTE	TE	Ranks
						PDC5	YLR134W	non	523333	1
						HSP82	YPL240C	0.900002	342308	2
						RNR1	YER070W	1.04464	195333	3
						PHO84	YML123C	non	152273	4
						LYS1	YIR034C	1.38032	86153.8	5
						CAR2	YLR438W	0.4938	80000	6
						MET6	YER091C	0.471392	75428.6	7
						A4DH	YGL256W	non	32.0513	3701
						DSE4	YNR067C	non	22.9643	3702
						RPS4A	YJR145C	1.29684	22.4706	3703
						RPT1	YKL145W	0.850274	12.8049	3704
						HSP10	YOR020C	non	12.314	3705
						RPL3	YOR063W	1.06142	12.2616	3706
						TEF2	YBR118W	1.11884	9.07258	3707
						TEF1	YPR080W	1.13524	7.58551	3708
